# Supplementary material for: New Thinking on Read-Aloud.
Source: Springer Nature journal article supplement (doi:10.1038/s41598-022-07628-z), 2001-01-01

# Computing microRNA-gene interaction networks in pan-cancer using miRDriver

Banabithi Bose, Matthew Moravec, and Serdar Bozdog

# Supplemental Figure S1

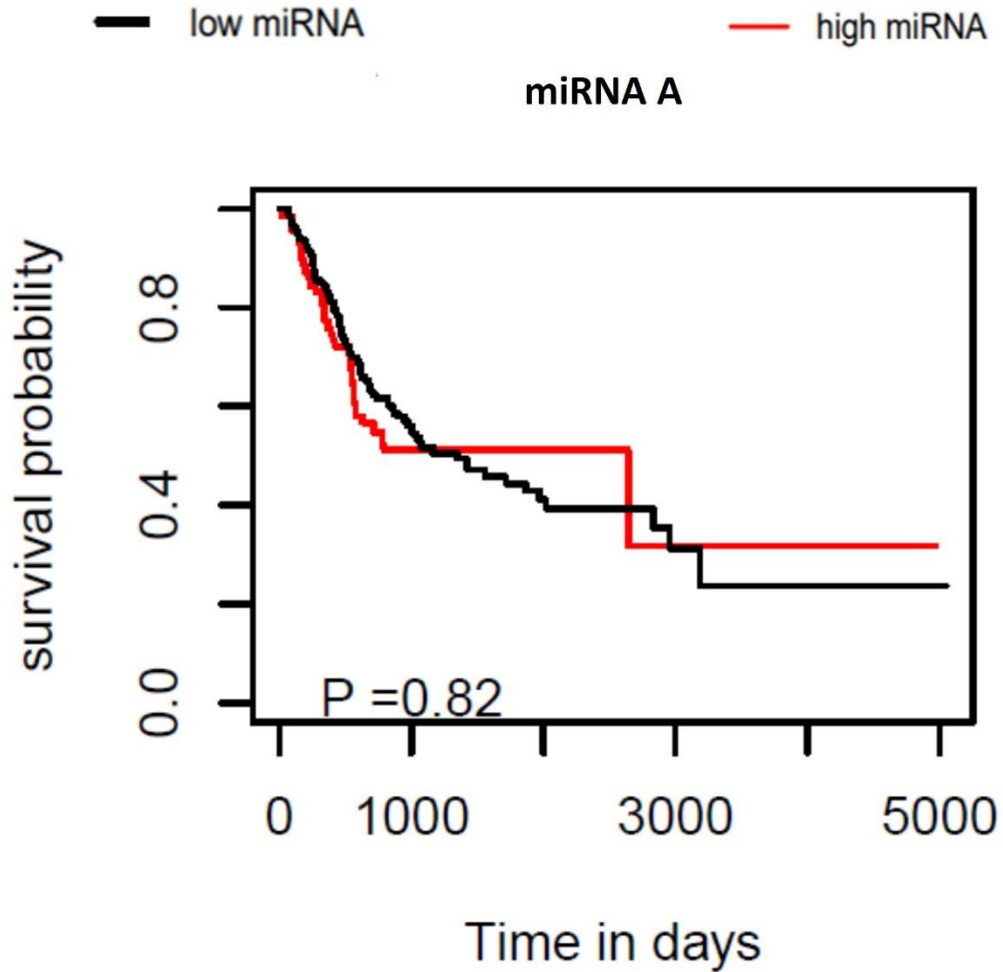

The *Adjusted Kaplan-Meier* survival plots for the computed miRNAs in high and low miRNA expression patient groups.

# Cancer Type: ACC

OS hsa-mir-1538

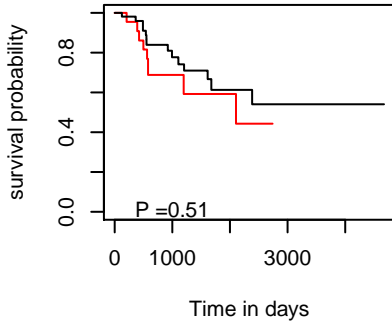

PFI hsa-mir-1538

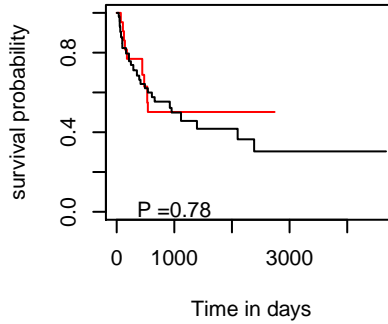

DFI hsa-mir-1538

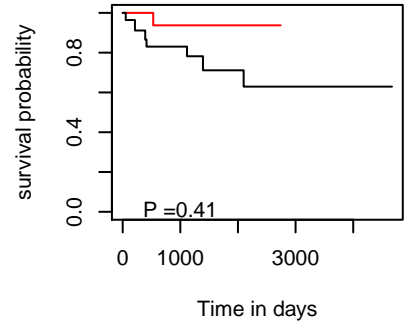

DSS hsa-mir-1538

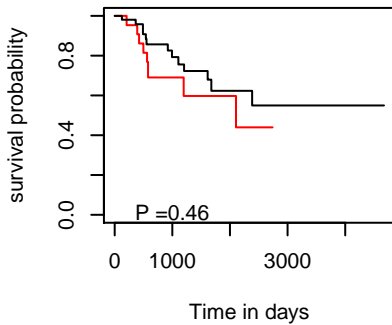

OS hsa-mir-153-2

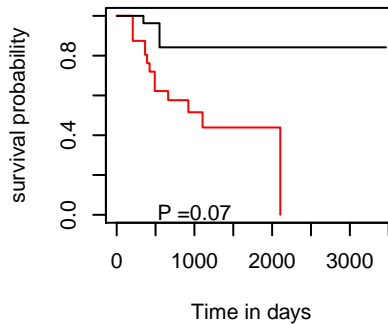

PFI hsa-mir-153-2

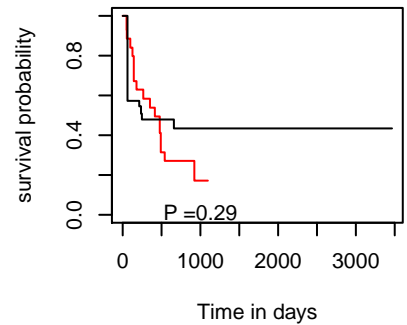

DFI hsa-mir-153-2

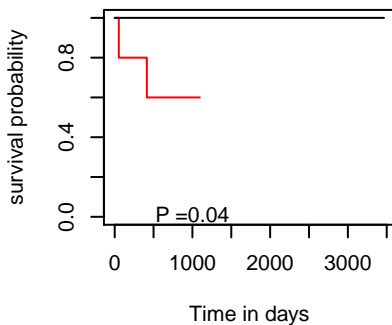

DSS hsa-mir-153-2

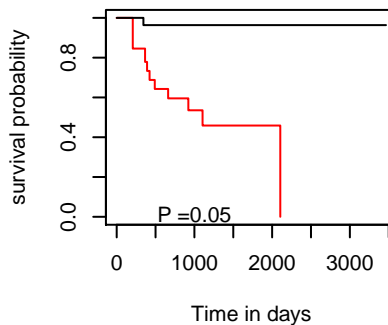

OS hsa-mir-6781

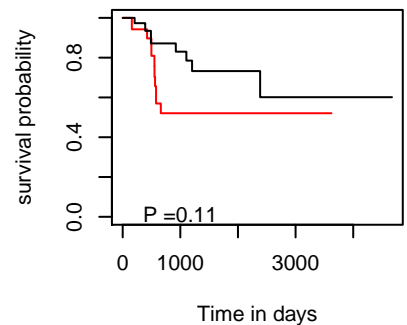

**PFI hsa-mir-6781**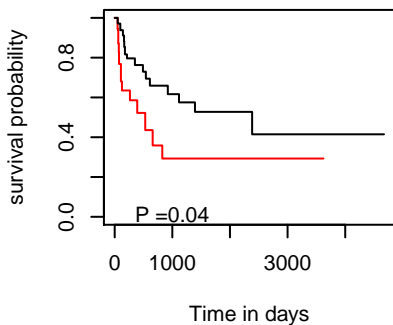**DFI hsa-mir-6781**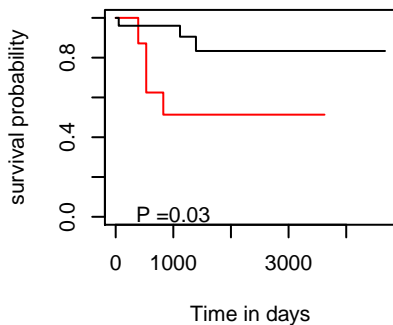**DSS hsa-mir-6781**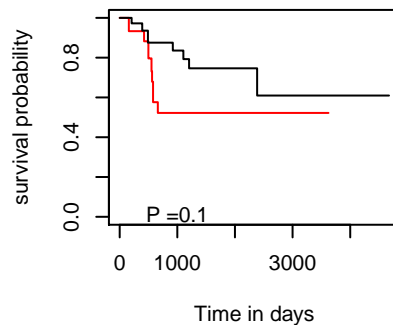**OS hsa-mir-6808**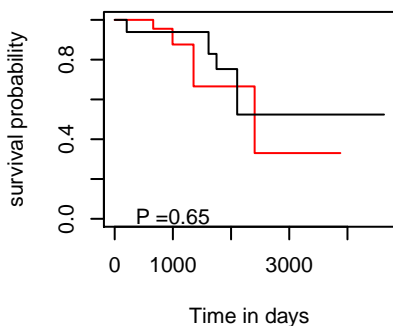**PFI hsa-mir-6808**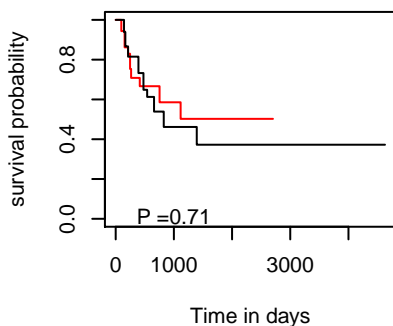**DFI hsa-mir-6808**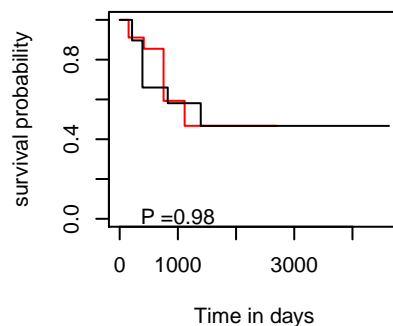**DSS hsa-mir-6808**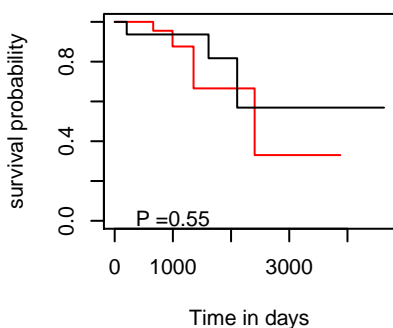**OS hsa-mir-3199-2**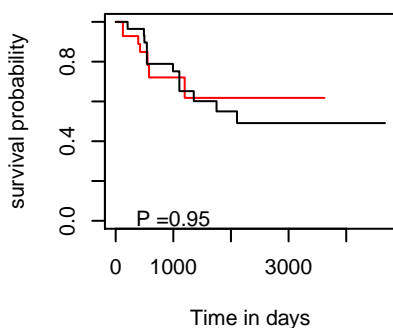**PFI hsa-mir-3199-2**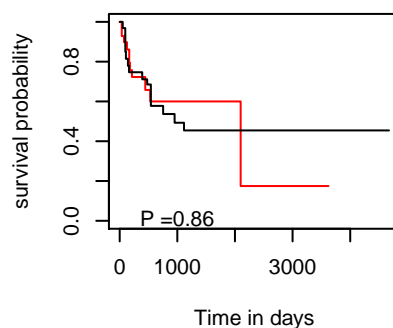

**DFI hsa-mir-3199-2**

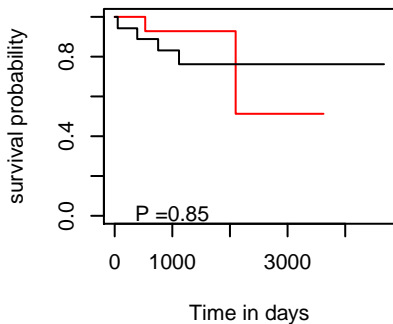

**DSS hsa-mir-3199-2**

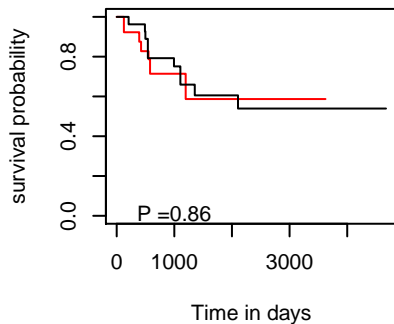

**OS hsa-mir-149**

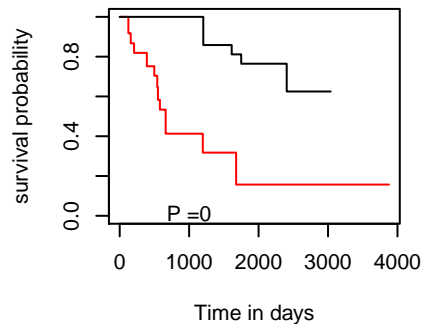

**PFI hsa-mir-149**

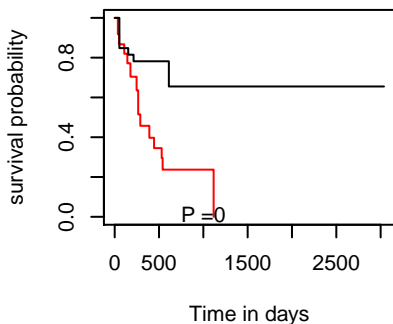

**DFI hsa-mir-149**

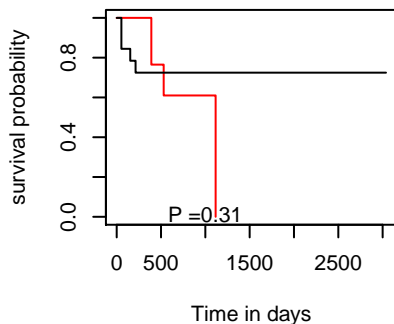

**DSS hsa-mir-149**

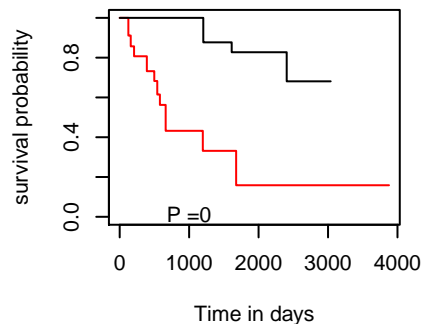

**OS hsa-mir-4786**

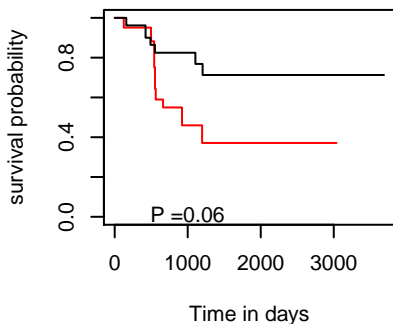

**PFI hsa-mir-4786**

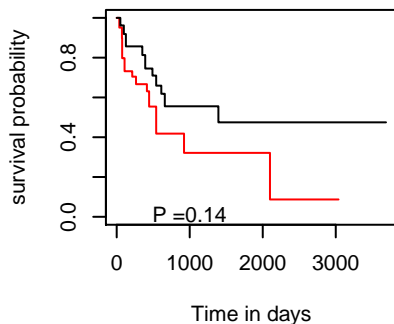

**DFI hsa-mir-4786**

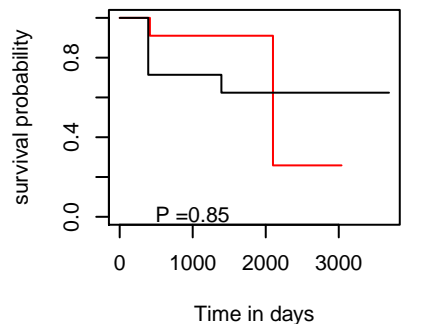

**DSS hsa-mir-4786**

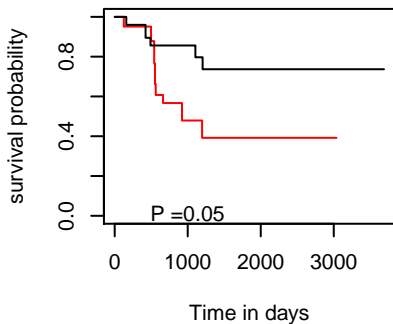

**OS hsa-mir-3913-1**

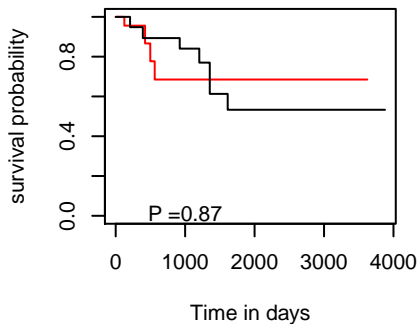

**PFI hsa-mir-3913-1**

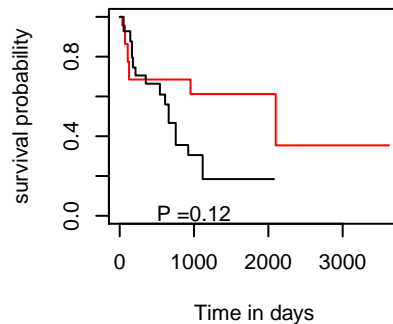

**DFI hsa-mir-3913-1**

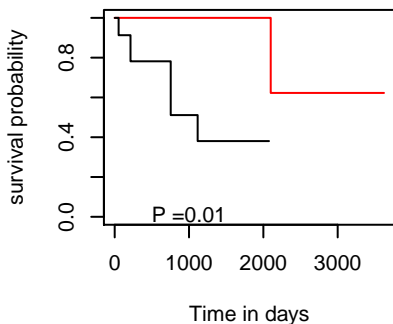

**DSS hsa-mir-3913-1**

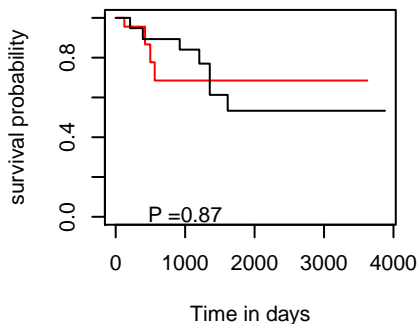

**OS hsa-mir-6502**

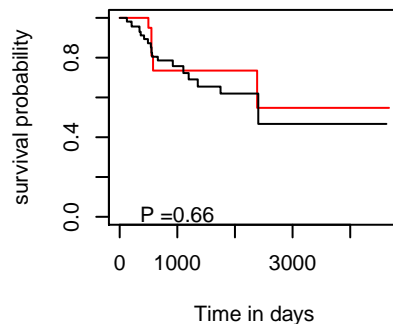

**PFI hsa-mir-6502**

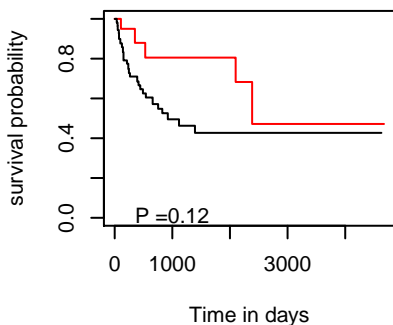

**DFI hsa-mir-6502**

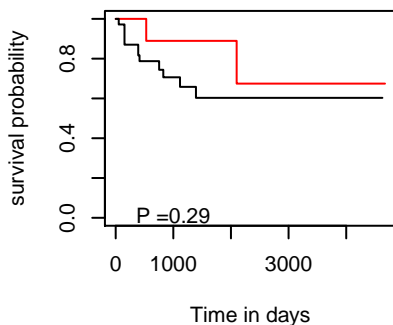

**DSS hsa-mir-6502**

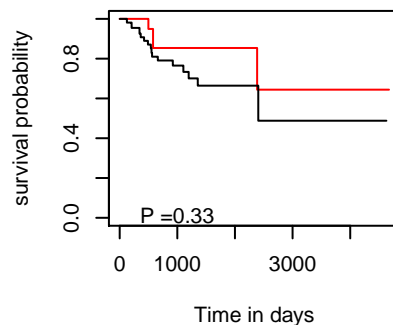

**OS hsa-mir-6880**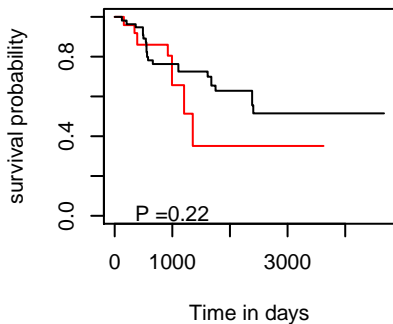**PFI hsa-mir-6880**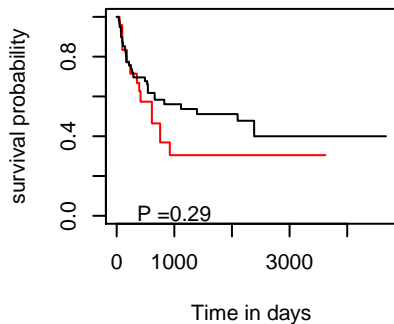**DFI hsa-mir-6880**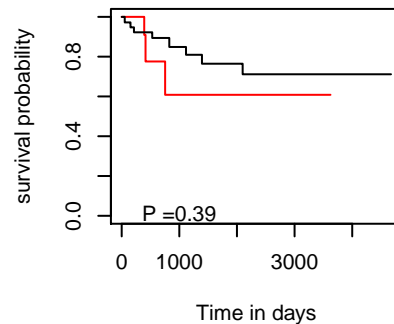**DSS hsa-mir-6880**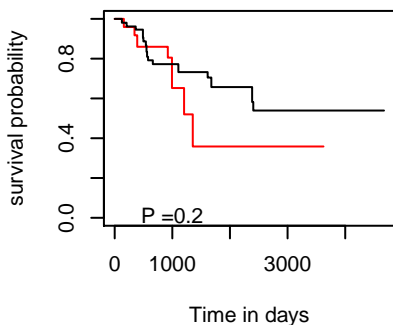**OS hsa-mir-6784**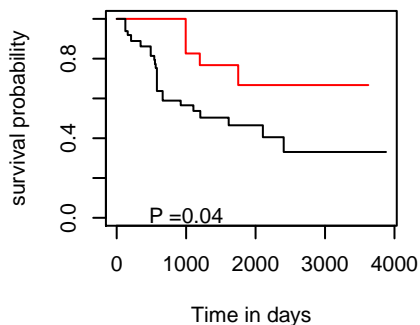**PFI hsa-mir-6784**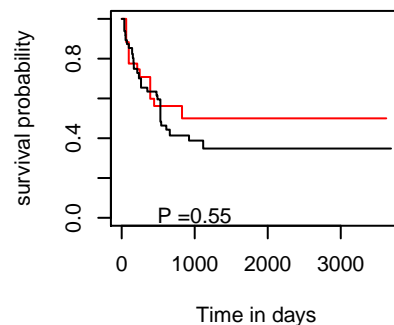**DFI hsa-mir-6784**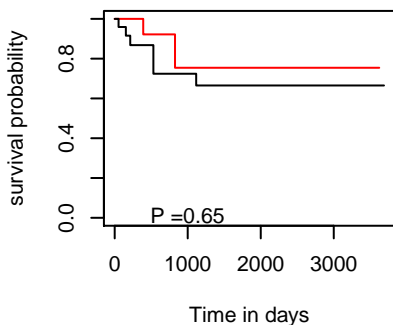**DSS hsa-mir-6784**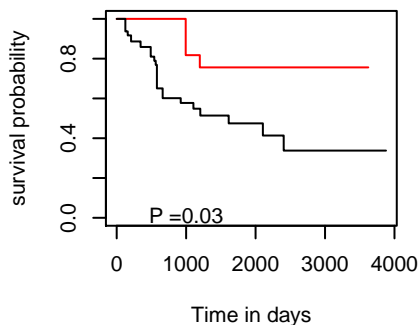**OS hsa-mir-6758**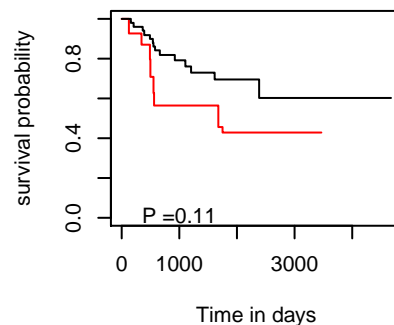

**PFI hsa-mir-6758**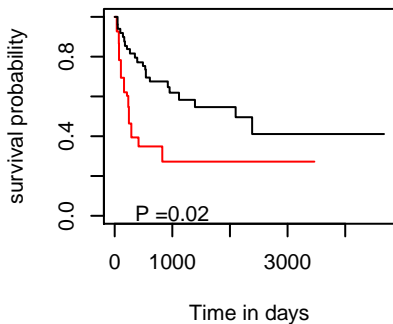**DFI hsa-mir-6758**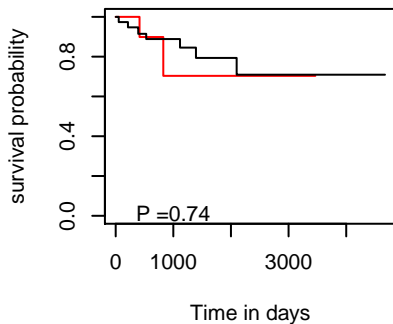**DSS hsa-mir-6758**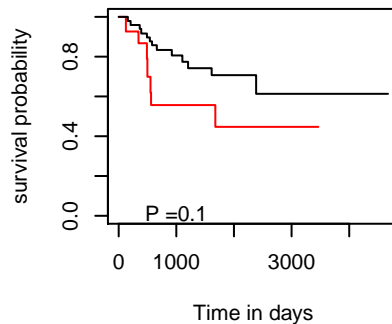**OS hsa-mir-1228**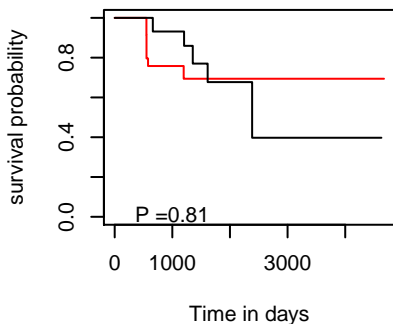**PFI hsa-mir-1228**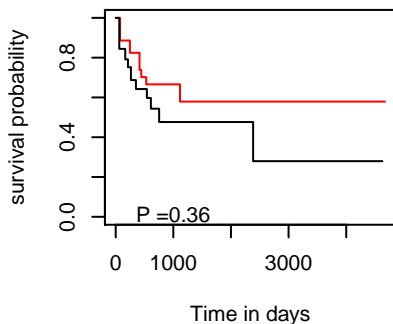**DFI hsa-mir-1228**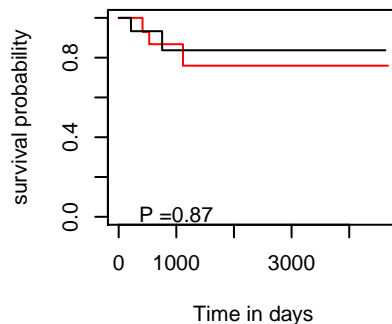**DSS hsa-mir-1228**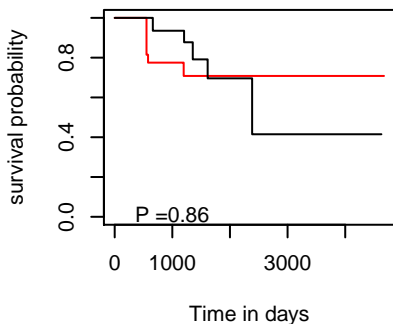**OS hsa-mir-3198-2**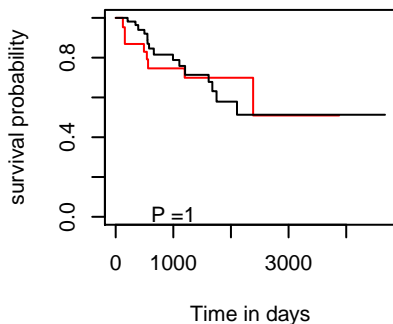**PFI hsa-mir-3198-2**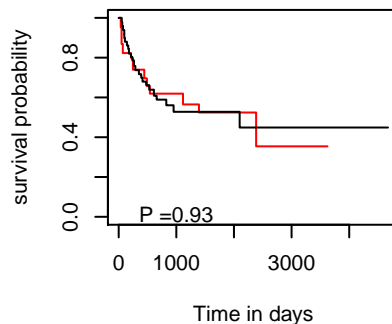

**DFI hsa-mir-3198-2**

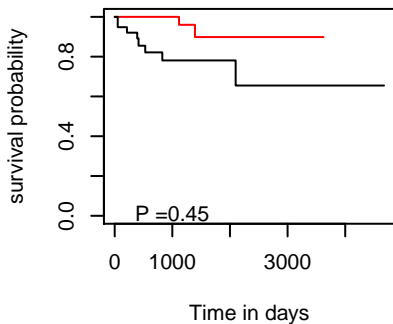

**DSS hsa-mir-3198-2**

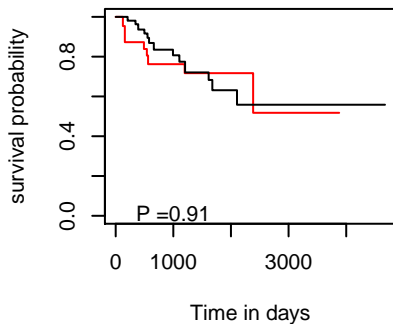

**OS hsa-mir-616**

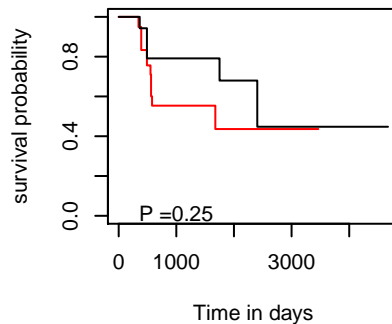

**PFI hsa-mir-616**

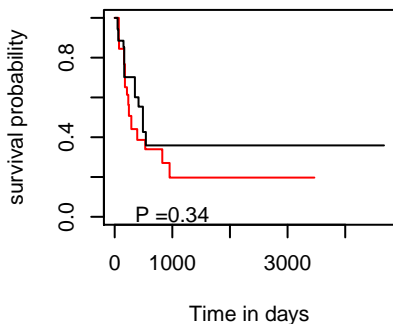

**DFI hsa-mir-616**

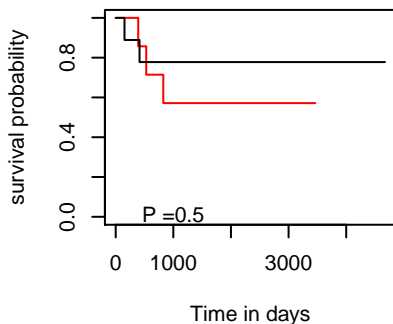

**DSS hsa-mir-616**

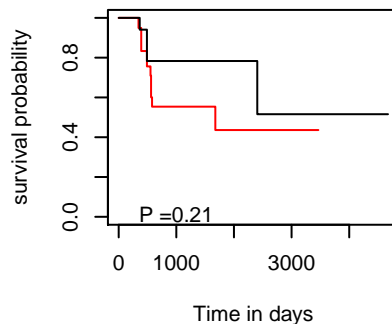

**OS hsa-mir-26a-2**

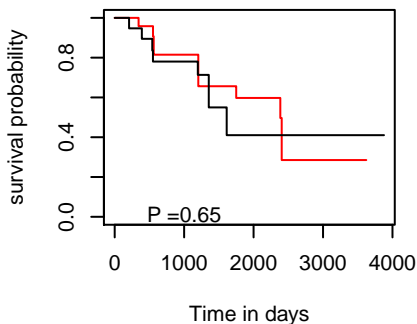

**PFI hsa-mir-26a-2**

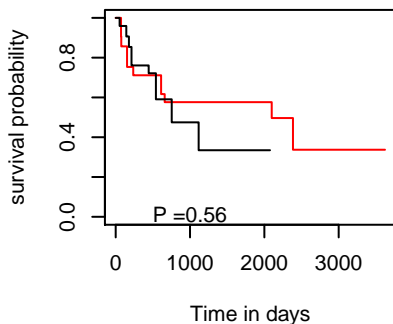

**DFI hsa-mir-26a-2**

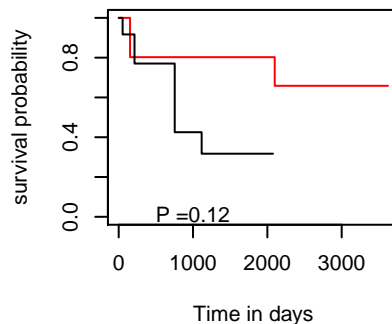

DSS hsa-mir-26a-2

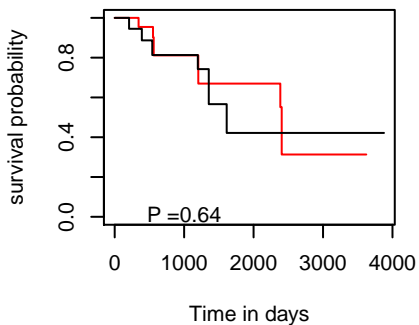

OS hsa-mir-4632

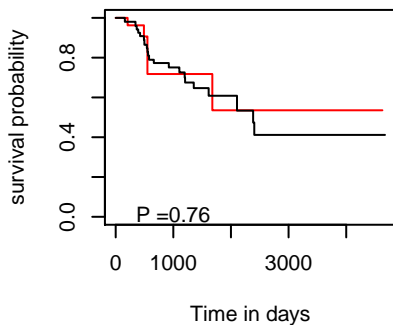

PFI hsa-mir-4632

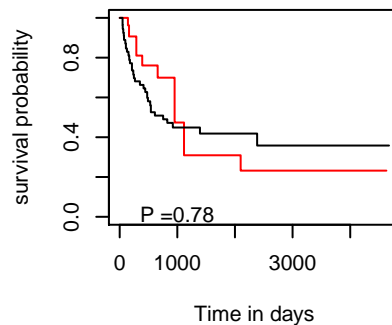

DFI hsa-mir-4632

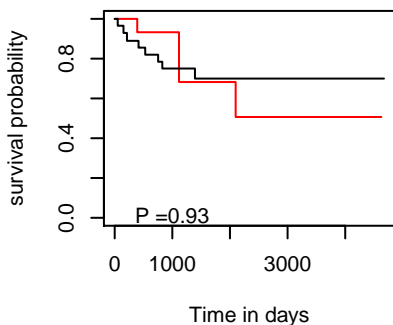

DSS hsa-mir-4632

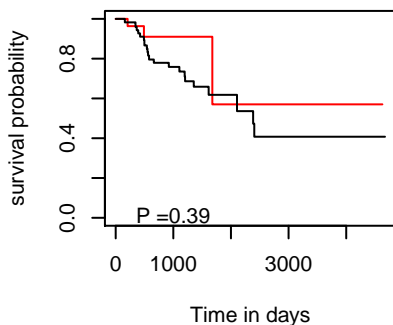

OS hsa-mir-6723

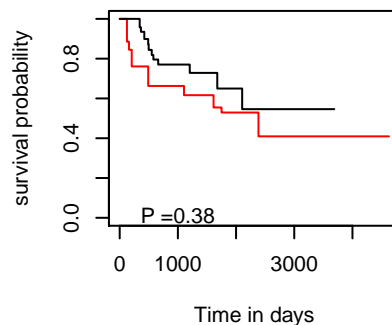

PFI hsa-mir-6723

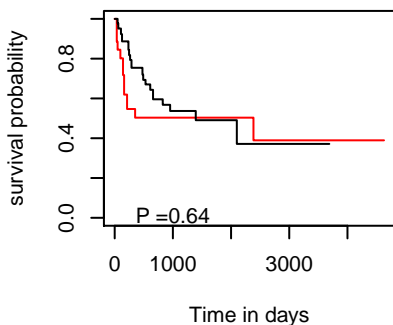

DFI hsa-mir-6723

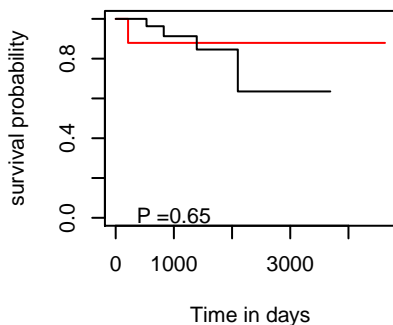

DSS hsa-mir-6723

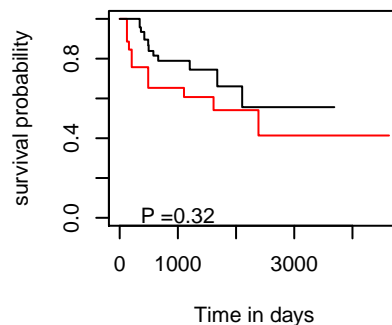

**OS hsa-mir-580**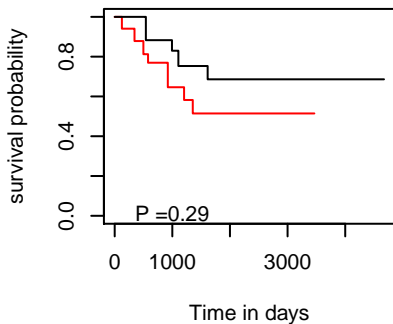**PFI hsa-mir-580**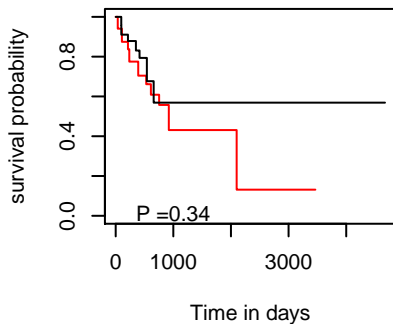**DFI hsa-mir-580**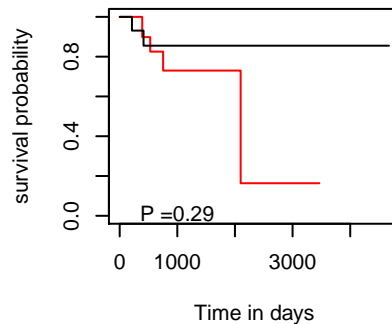**DSS hsa-mir-580**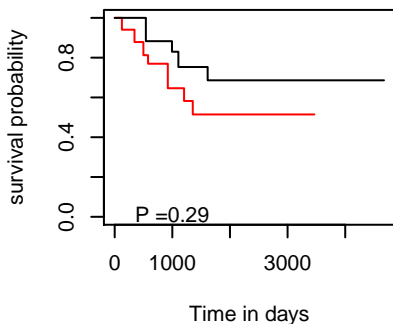**OS hsa-mir-34a**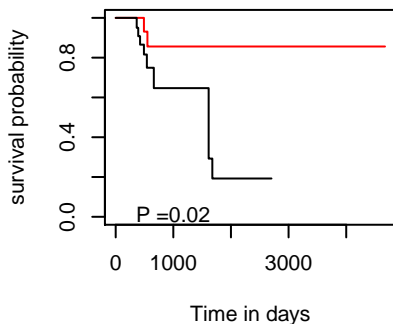**PFI hsa-mir-34a**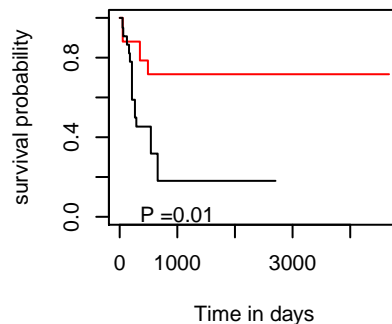**DFI hsa-mir-34a**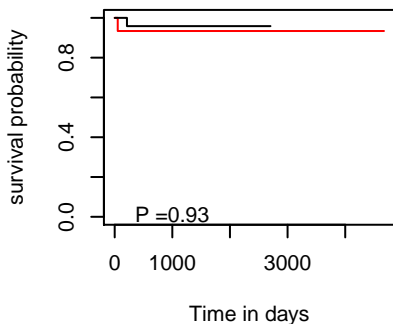**DSS hsa-mir-34a**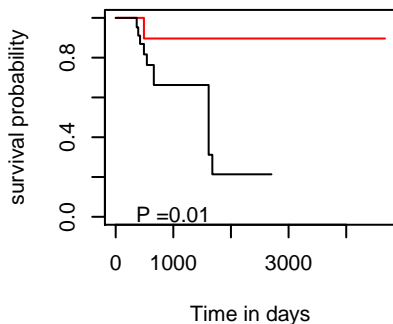**OS hsa-mir-148b**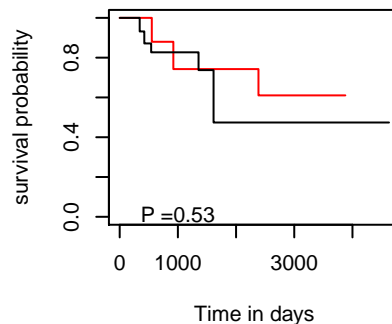

**PFI hsa-mir-148b**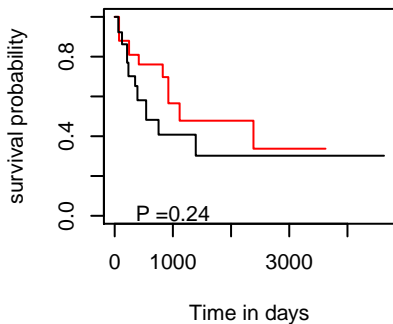**DFI hsa-mir-148b**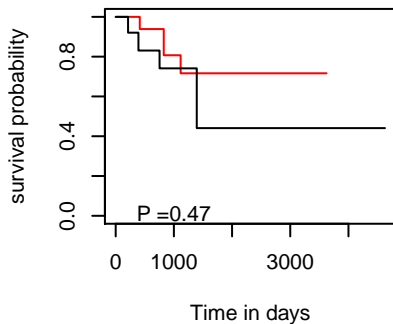**DSS hsa-mir-148b**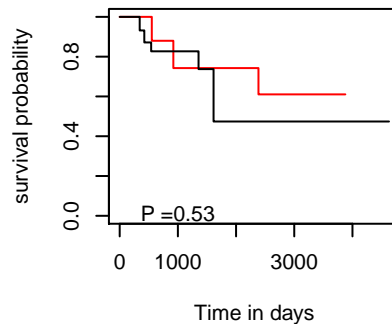**OS hsa-mir-200b**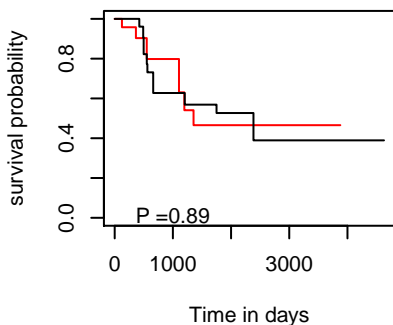**PFI hsa-mir-200b**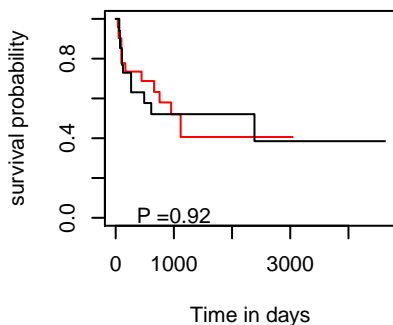**DFI hsa-mir-200b**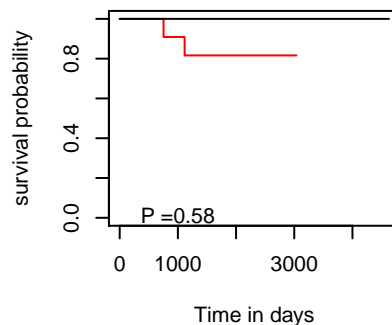**DSS hsa-mir-200b**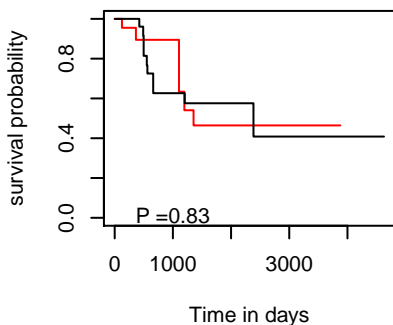**OS hsa-mir-34b**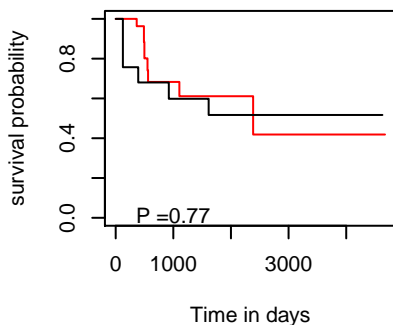**PFI hsa-mir-34b**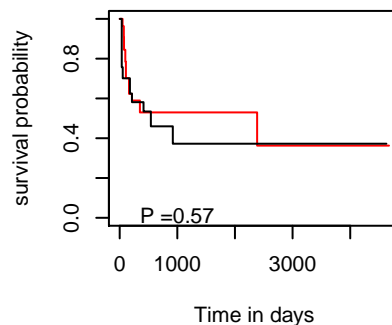

**DFI hsa-mir-34b**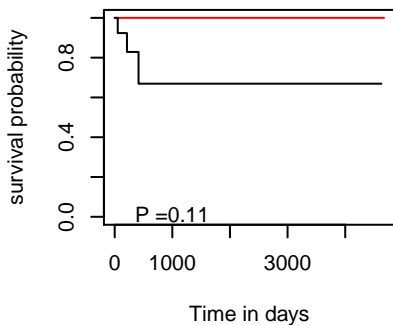**DSS hsa-mir-34b**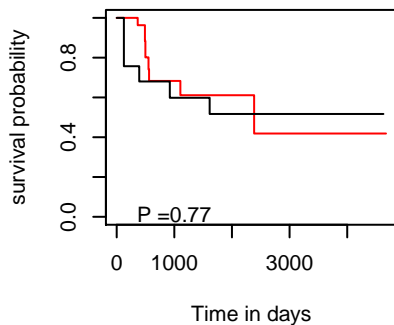**OS hsa-mir-5010**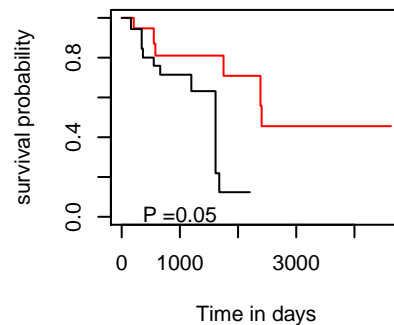**PFI hsa-mir-5010**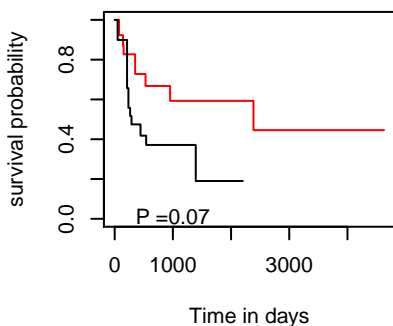**DFI hsa-mir-5010**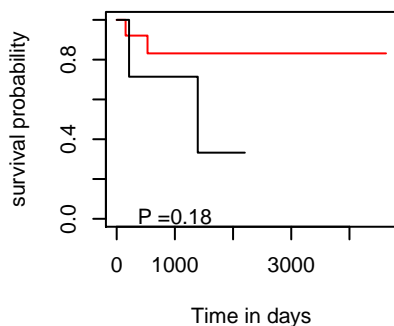**DSS hsa-mir-5010**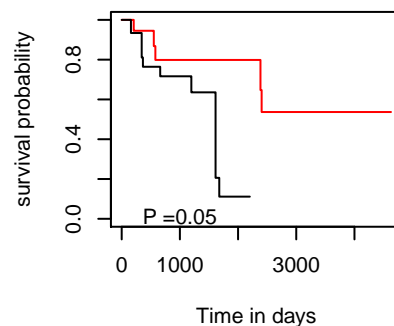**OS hsa-mir-429**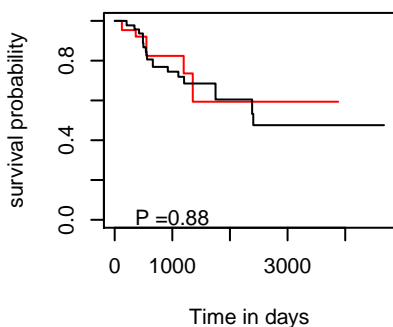**PFI hsa-mir-429**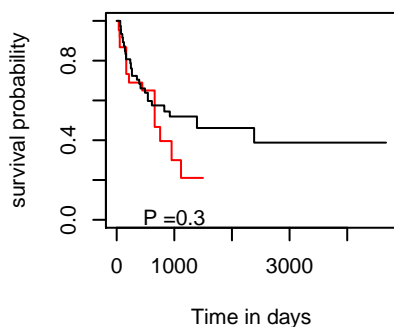**DFI hsa-mir-429**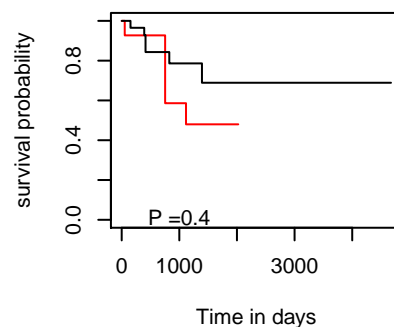

**DSS hsa-mir-429**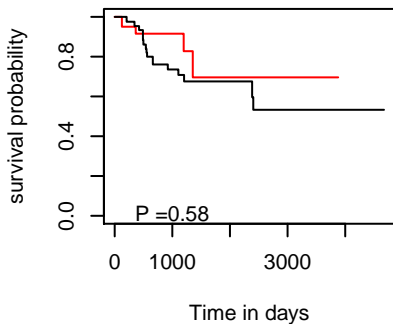**OS hsa-mir-1306**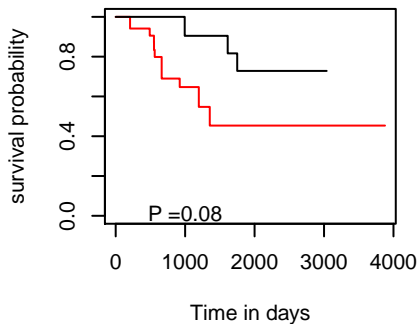**PFI hsa-mir-1306**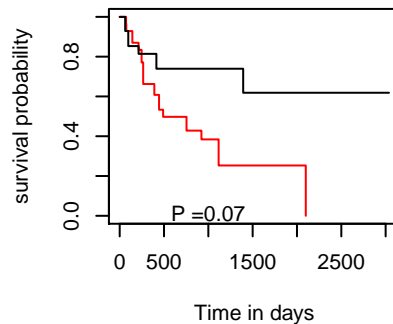**DFI hsa-mir-1306**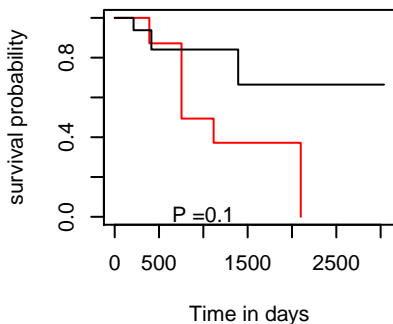**DSS hsa-mir-1306**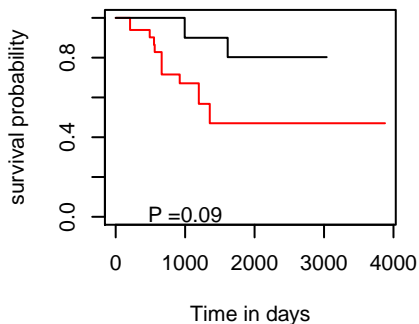**OS hsa-mir-185**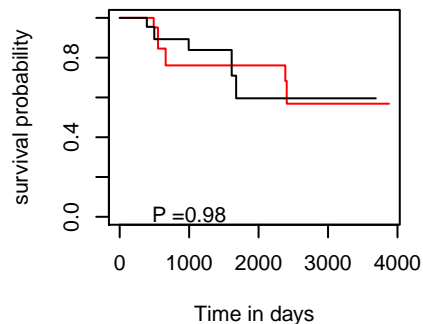**PFI hsa-mir-185**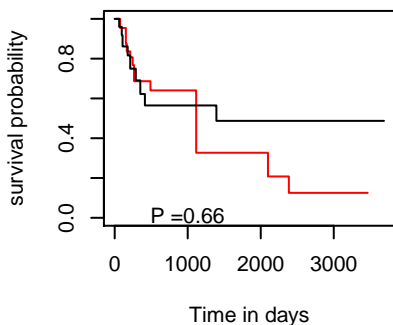**DFI hsa-mir-185**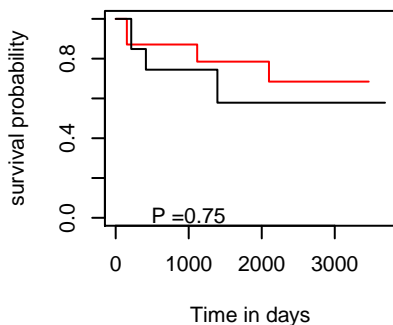**DSS hsa-mir-185**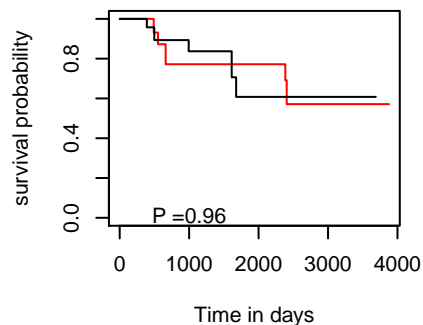

**OS hsa-mir-34c**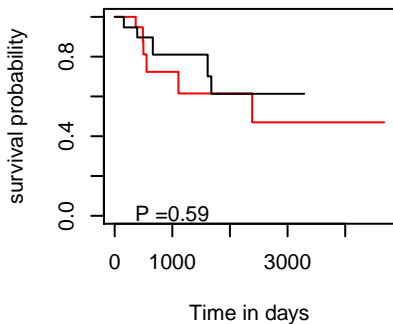**PFI hsa-mir-34c**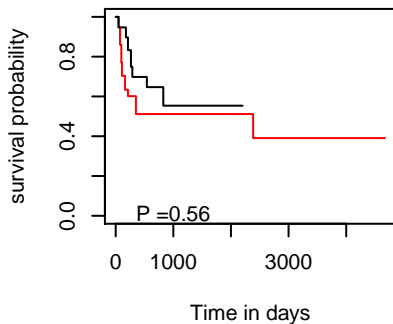**DFI hsa-mir-34c**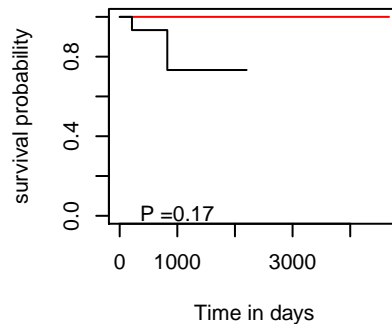**DSS hsa-mir-34c**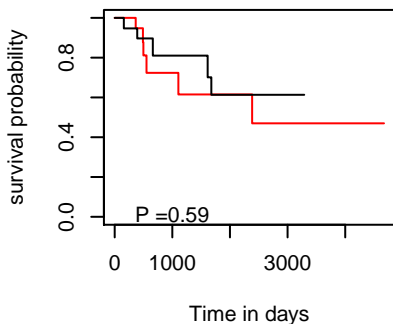**OS hsa-mir-6726**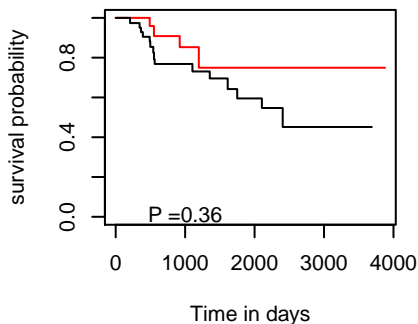**PFI hsa-mir-6726**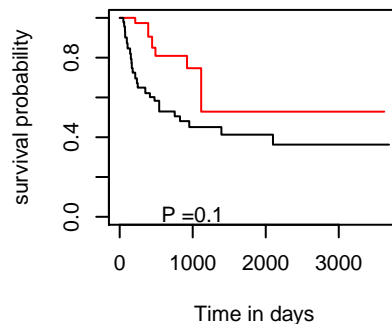**DFI hsa-mir-6726**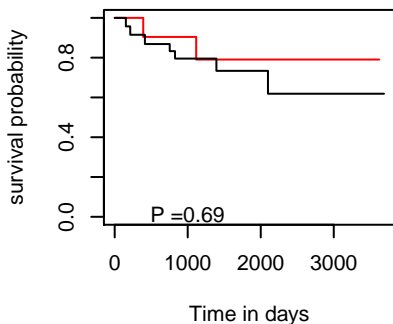**DSS hsa-mir-6726**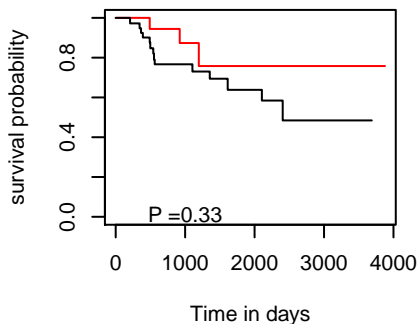**OS hsa-mir-6783**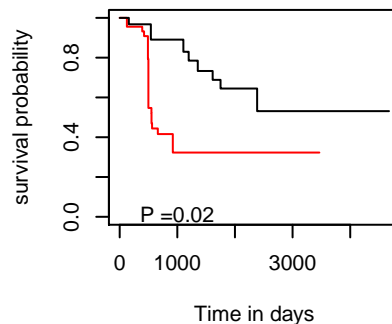

**PFI hsa-mir-6783**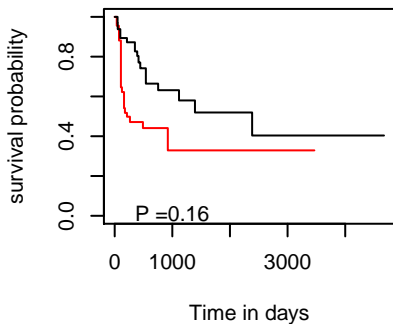**DFI hsa-mir-6783**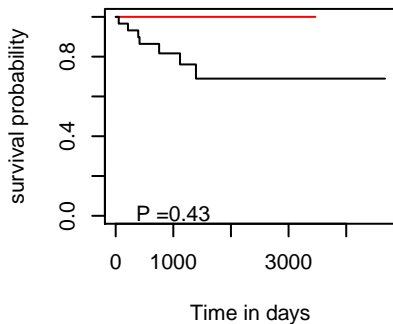**DSS hsa-mir-6783**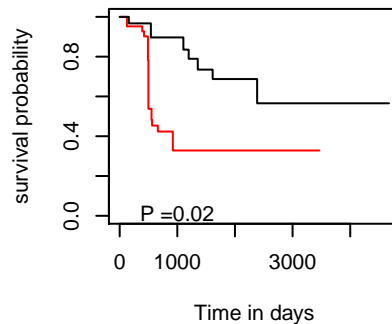**OS hsa-mir-1305**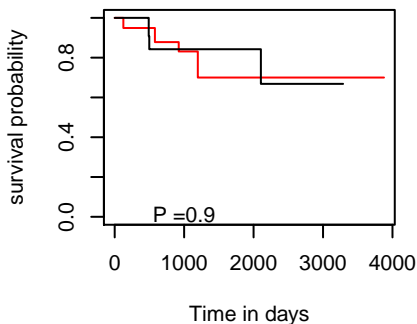**PFI hsa-mir-1305**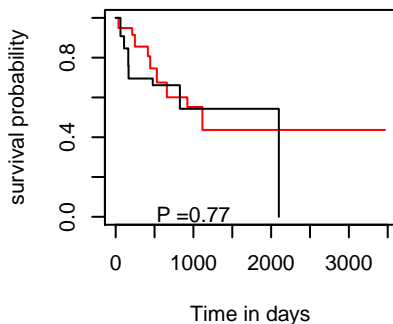**DFI hsa-mir-1305**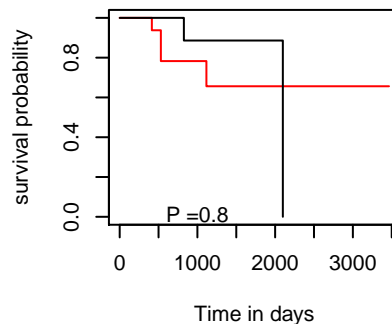**DSS hsa-mir-1305****OS hsa-mir-200a**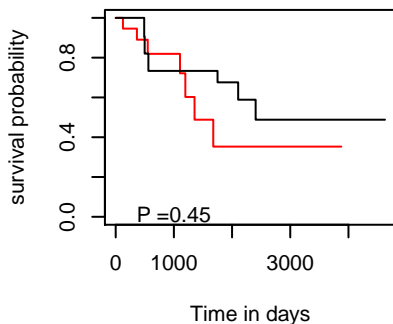**PFI hsa-mir-200a**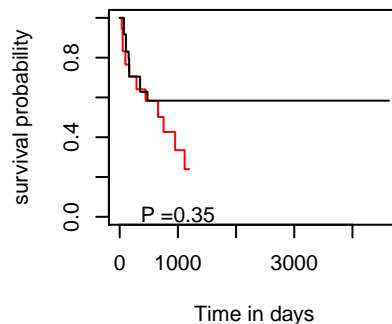

**DFI hsa-mir-200a**

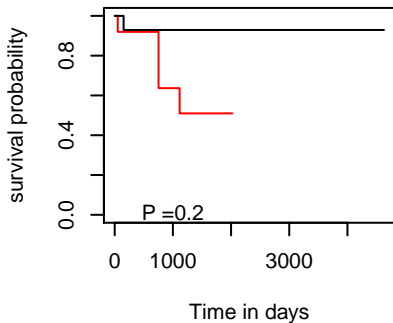

**DSS hsa-mir-200a**

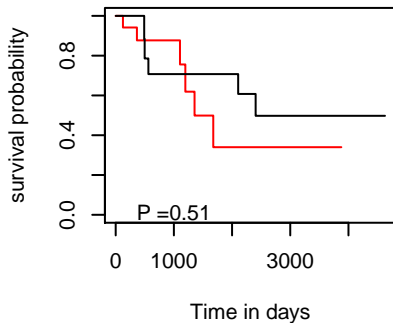

**OS hsa-mir-6782**

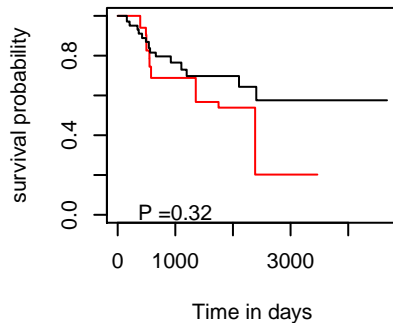

**PFI hsa-mir-6782**

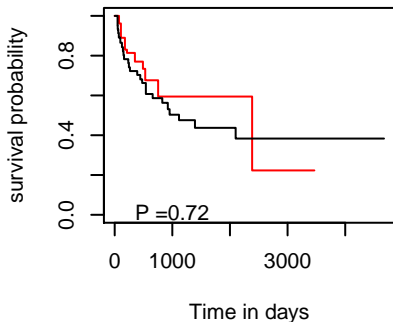

**DFI hsa-mir-6782**

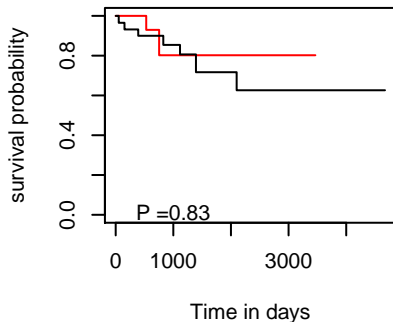

**DSS hsa-mir-6782**

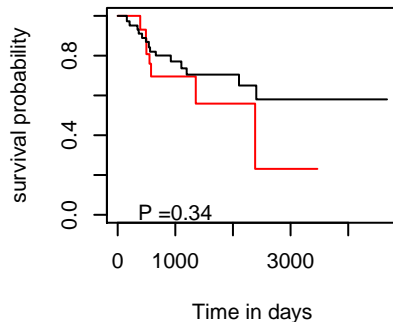

Supplement: MOESM10 [file 41598_2022_7628_MOESM10_ESM.pdf]
