# Supplementary material for: New Thinking on Read-Aloud.
Source: Springer Nature journal article supplement (doi:10.1038/s41598-022-07628-z), 2001-01-01

# Computing microRNA-gene interaction networks in pan-cancer using miRDriver

Banabithi Bose, Matthew Moravec, and Serdar Bozdag

# Supplemental Figure S2

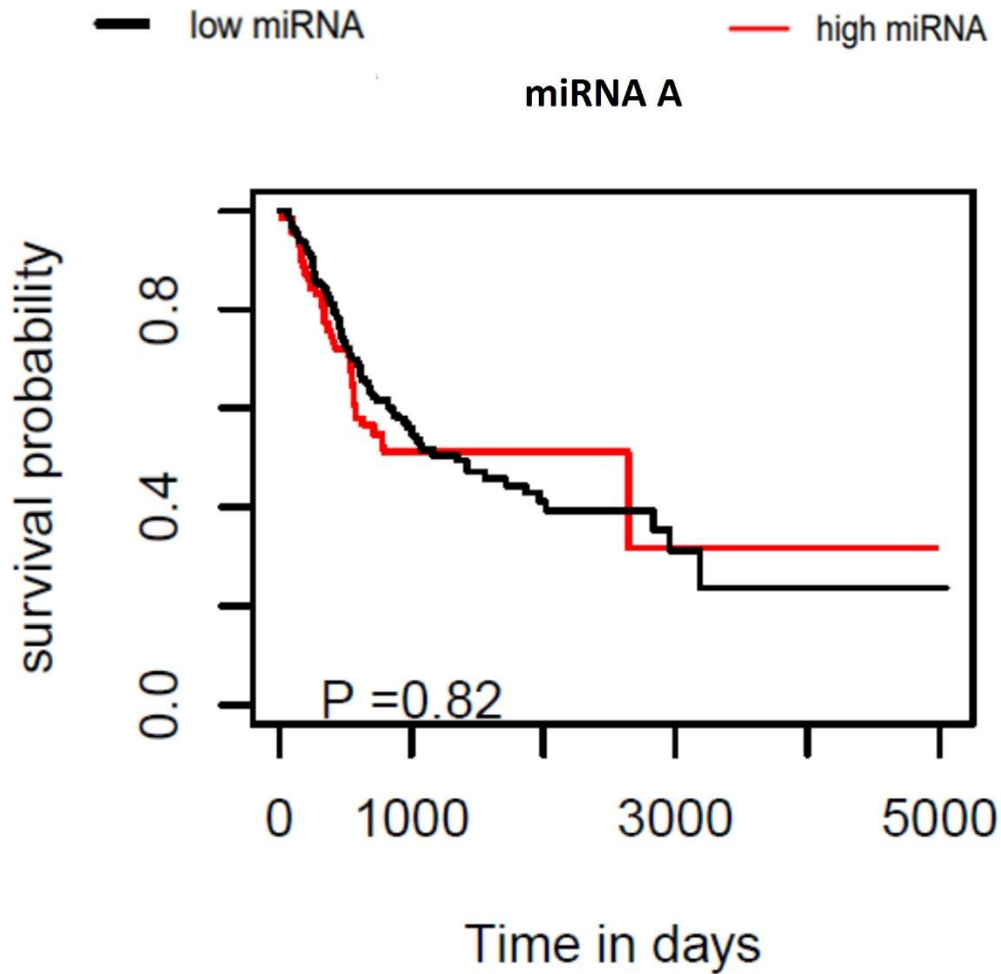

The *Adjusted Kaplan-Meier* survival plots for the computed miRNAs in high and low miRNA expression patient groups.

# Supplemental Figure S2

## Cancer Type: BLCA

OS hsa-mir-3680-2

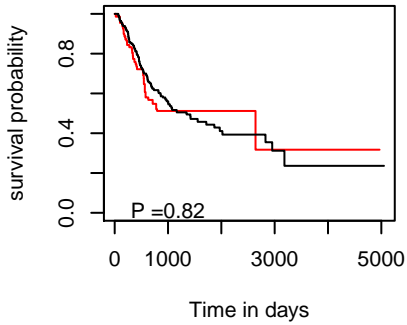

PFI hsa-mir-3680-2

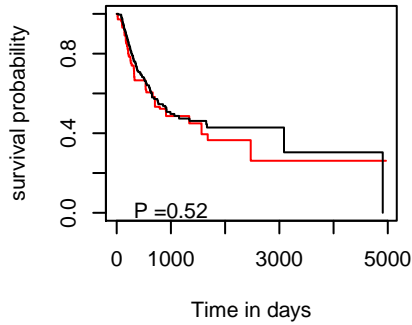

DFI hsa-mir-3680-2

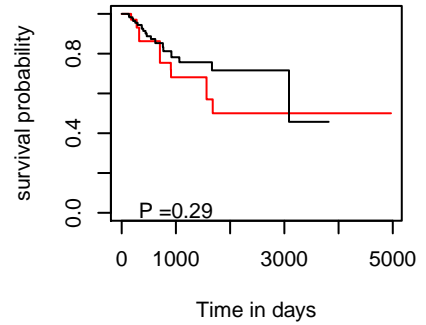

DSS hsa-mir-3680-2

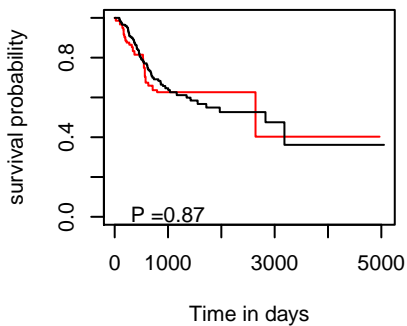

OS hsa-mir-6803

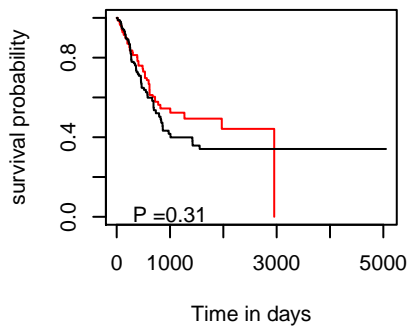

PFI hsa-mir-6803

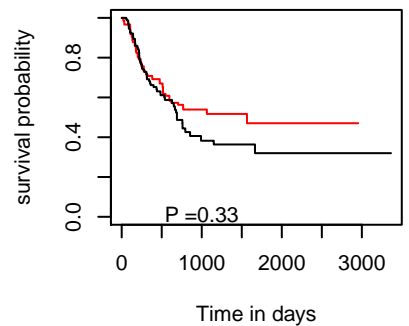

DFI hsa-mir-6803

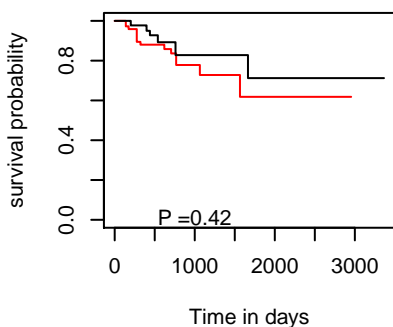

DSS hsa-mir-6803

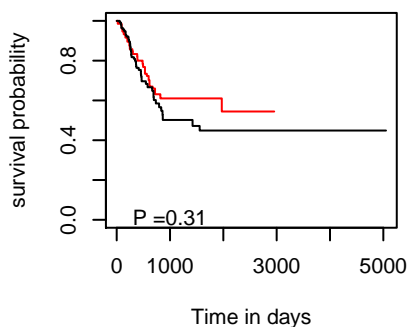

OS hsa-mir-3662

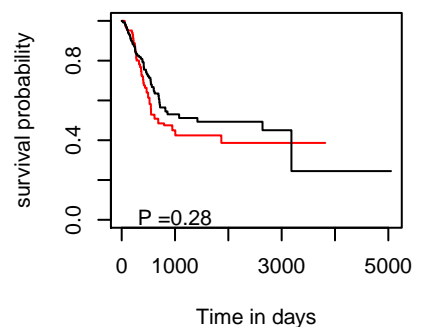

**PFI hsa-mir-3662**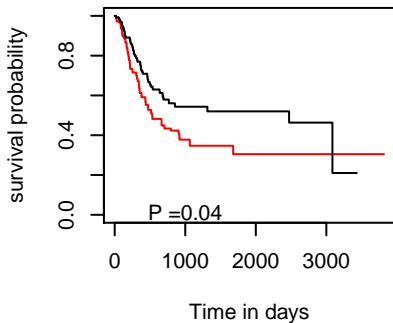**DFI hsa-mir-3662**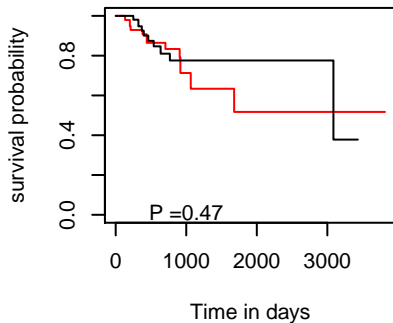**DSS hsa-mir-3662**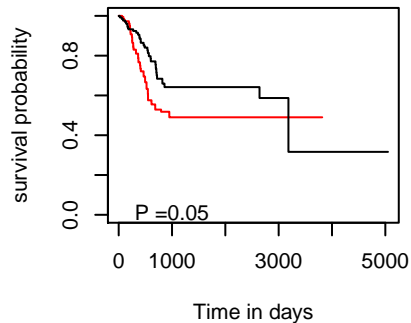**OS hsa-mir-16-1**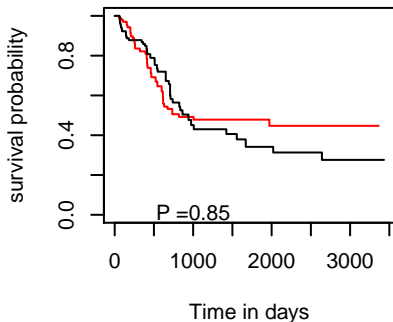**PFI hsa-mir-16-1**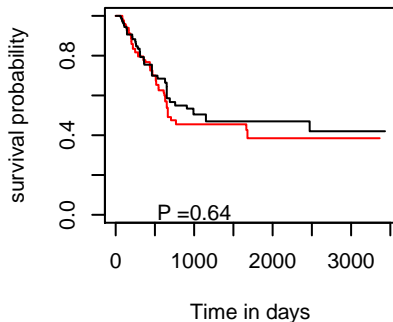**DFI hsa-mir-16-1**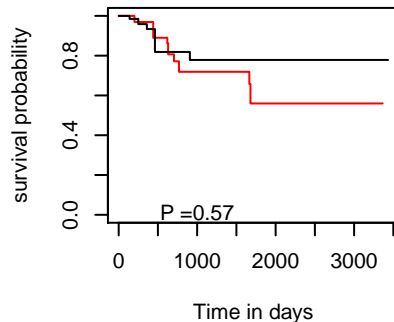**DSS hsa-mir-16-1**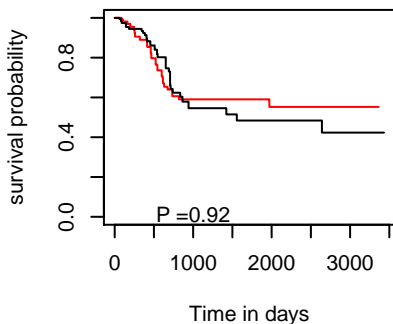**OS hsa-mir-3613**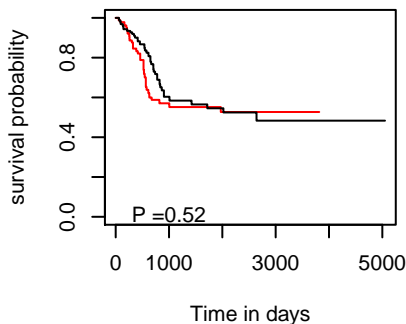**PFI hsa-mir-3613**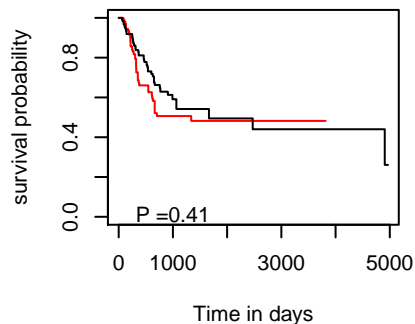

**DFI hsa-mir-3613**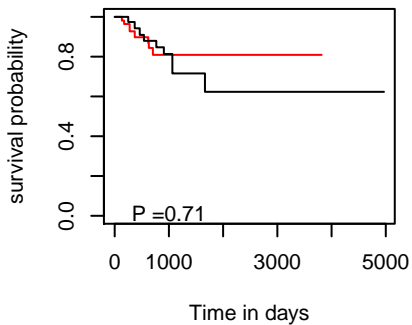**DSS hsa-mir-3613**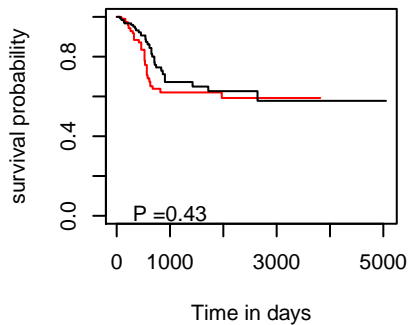**OS hsa-mir-1976**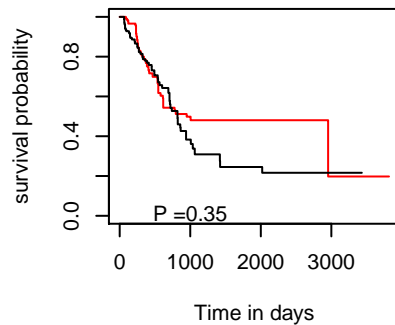**PFI hsa-mir-1976**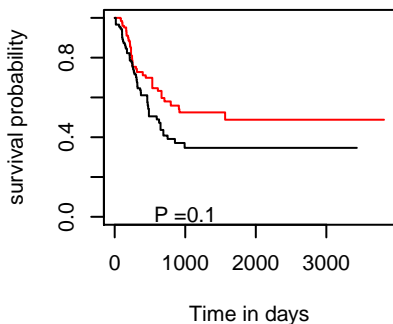**DFI hsa-mir-1976**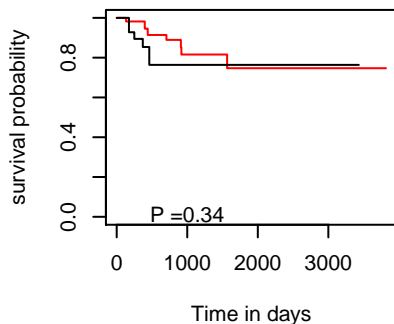**DSS hsa-mir-1976**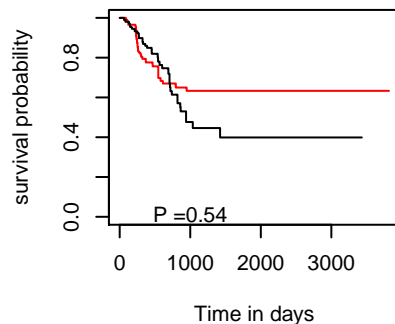**OS hsa-mir-185**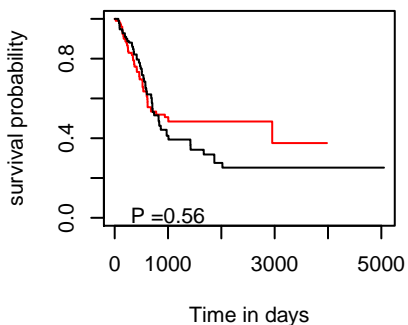**PFI hsa-mir-185**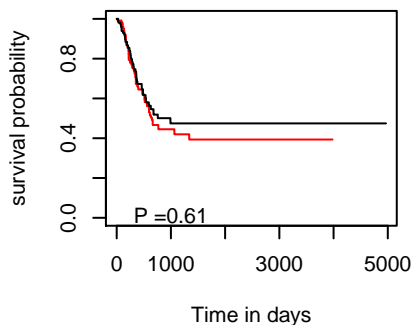**DFI hsa-mir-185**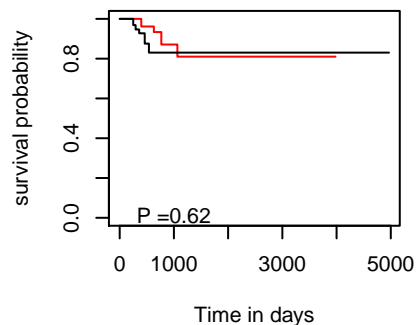

**DSS hsa-mir-185**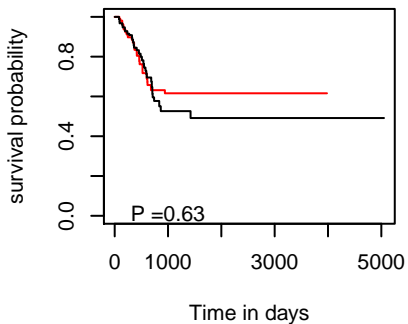**OS hsa-mir-5571**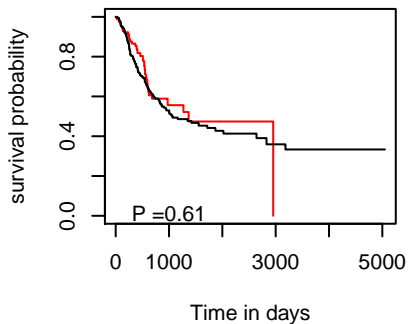**PFI hsa-mir-5571**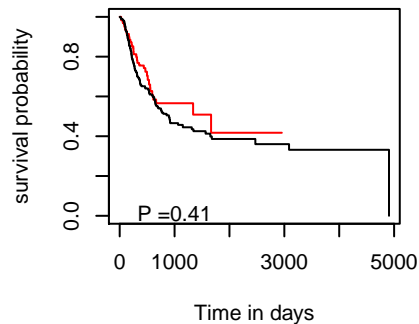**DFI hsa-mir-5571**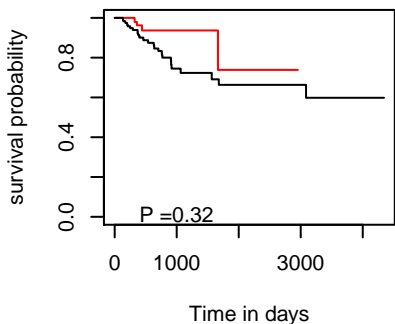**DSS hsa-mir-5571**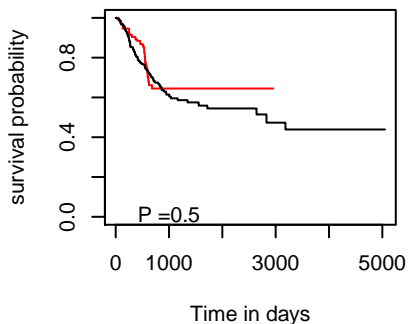**OS hsa-mir-6502**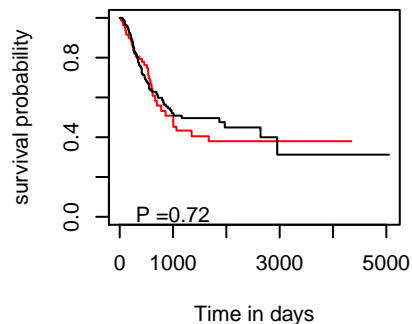**PFI hsa-mir-6502**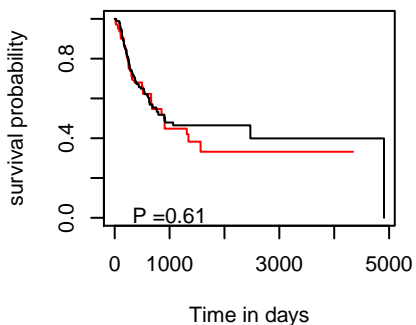**DFI hsa-mir-6502**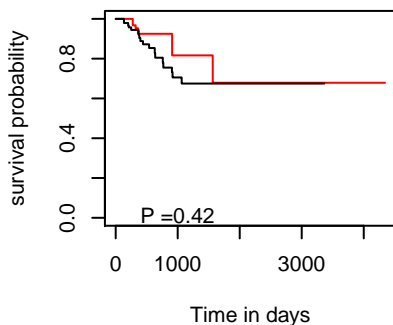**DSS hsa-mir-6502**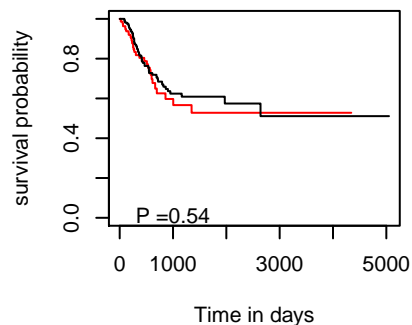

**OS hsa-mir-33a**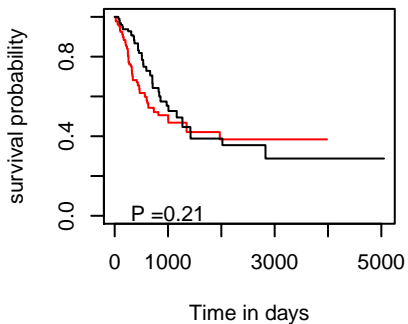**PFI hsa-mir-33a**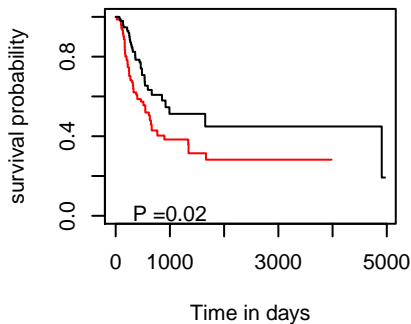**DFI hsa-mir-33a**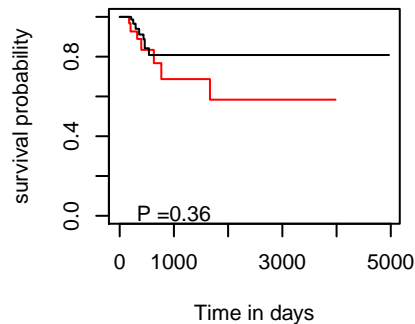**DSS hsa-mir-33a**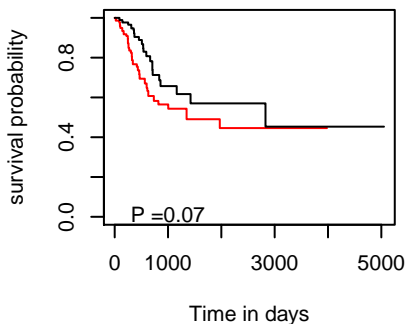**OS hsa-mir-627**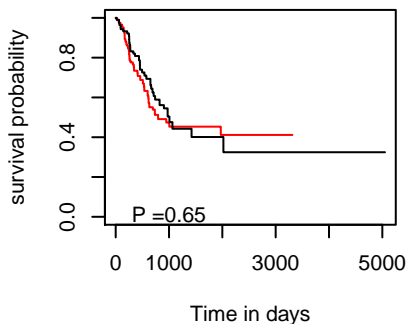**PFI hsa-mir-627**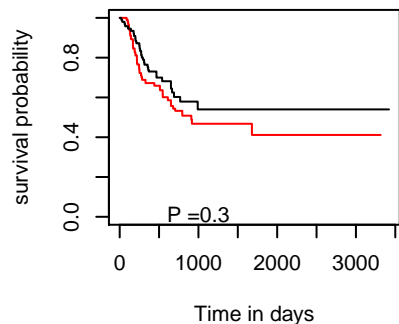**DFI hsa-mir-627**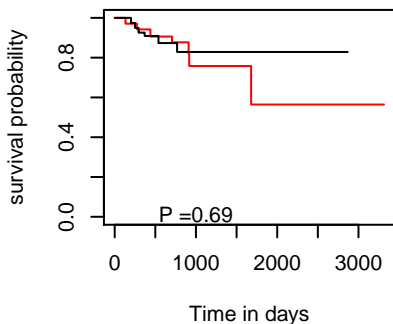**DSS hsa-mir-627**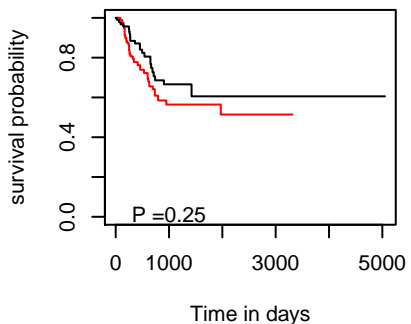**OS hsa-let-7a-2**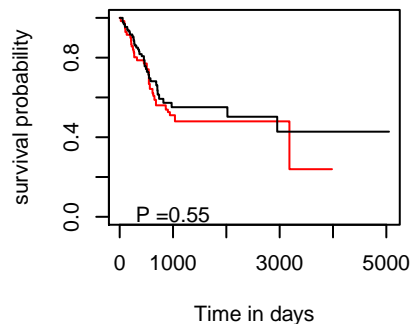

**PFI hsa-let-7a-2**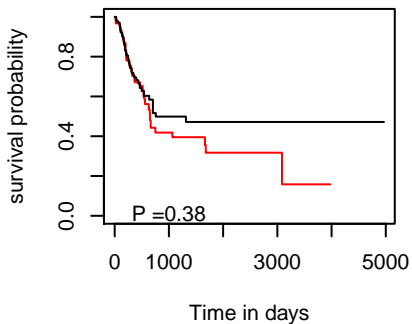**DFI hsa-let-7a-2**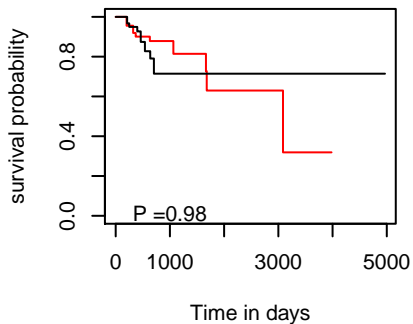**DSS hsa-let-7a-2**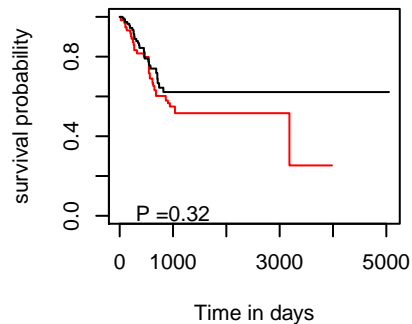**OS hsa-mir-100**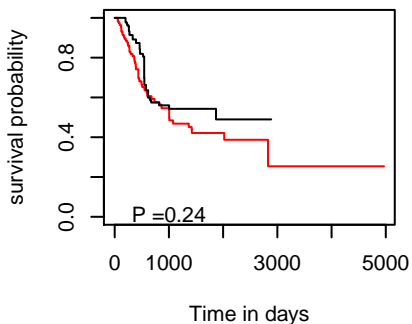**PFI hsa-mir-100**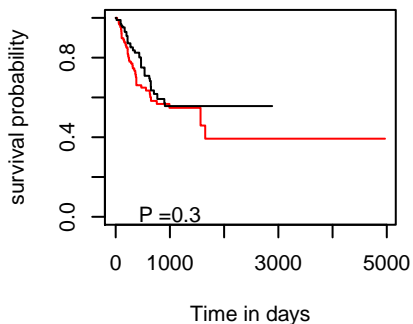**DFI hsa-mir-100**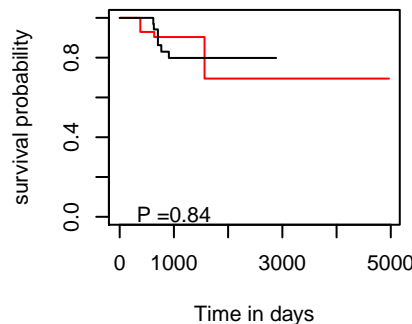**DSS hsa-mir-100**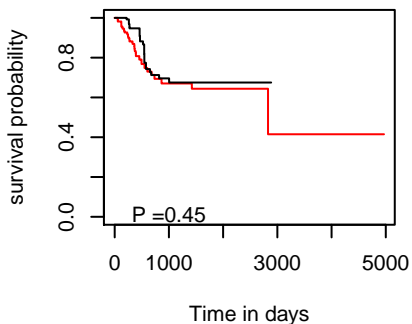**OS hsa-mir-4491**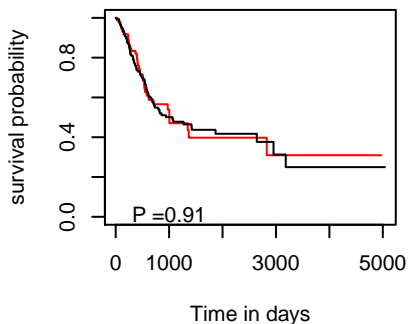**PFI hsa-mir-4491**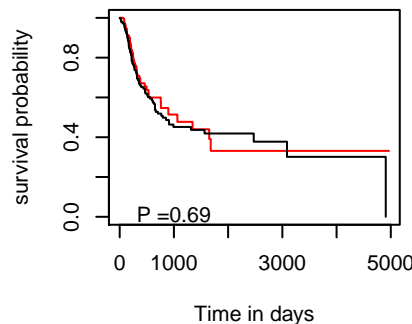

**DFI hsa-mir-4491**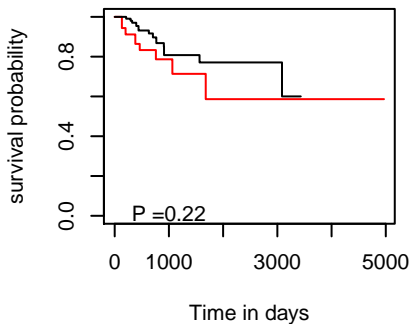**DSS hsa-mir-4491**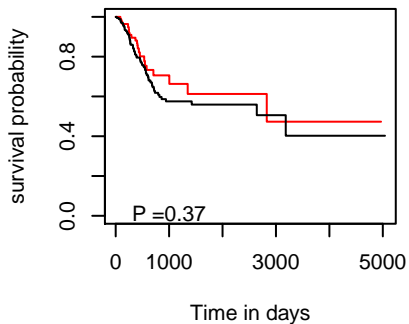**OS hsa-mir-144**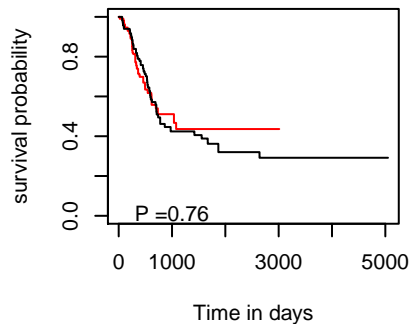**PFI hsa-mir-144**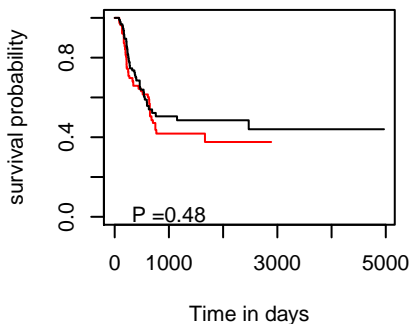**DFI hsa-mir-144**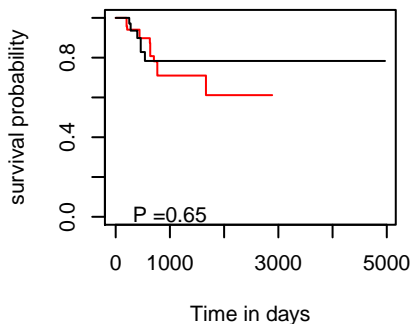**DSS hsa-mir-144**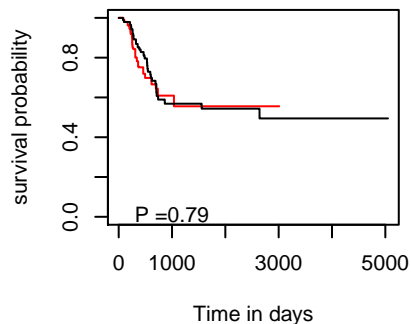**OS hsa-mir-3176**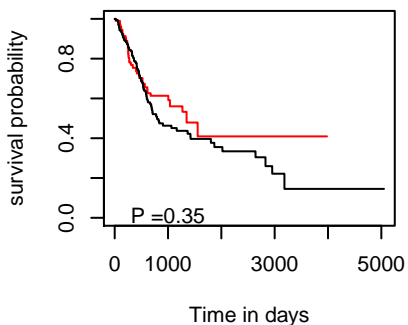**PFI hsa-mir-3176**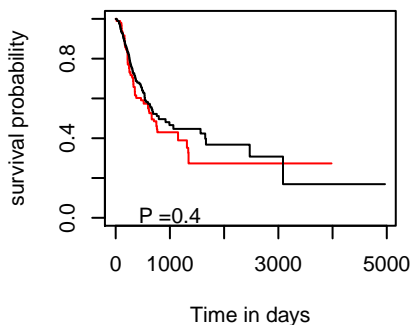**DFI hsa-mir-3176**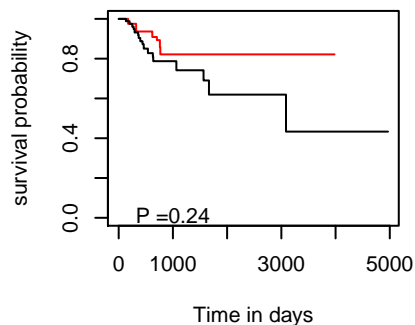

**DSS hsa-mir-3176**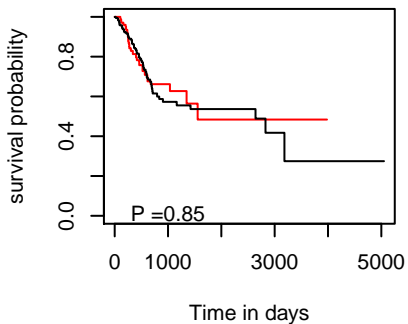**OS hsa-mir-876**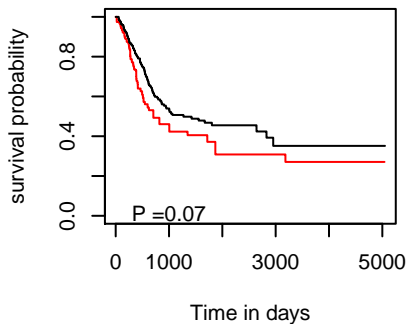**PFI hsa-mir-876**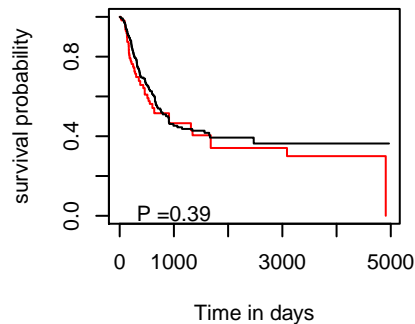**DFI hsa-mir-876**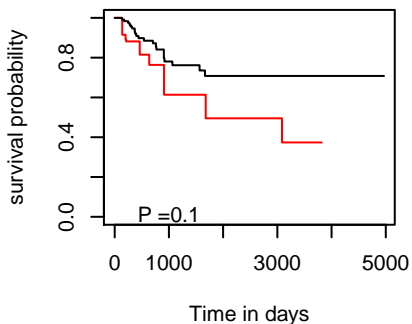**DSS hsa-mir-876**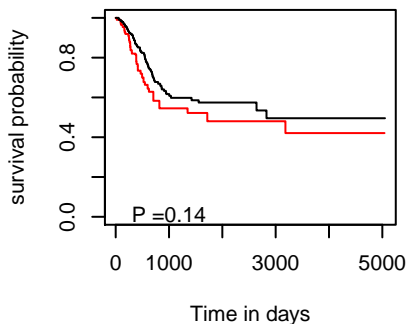**OS hsa-mir-3653**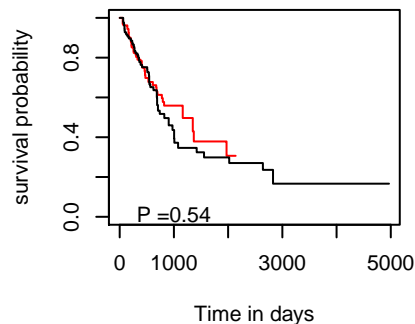**PFI hsa-mir-3653**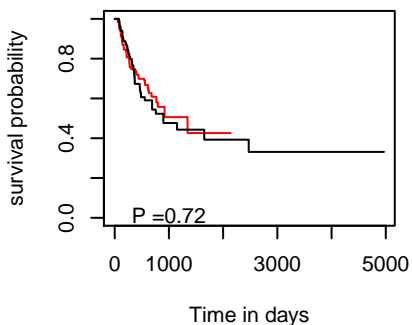**DFI hsa-mir-3653**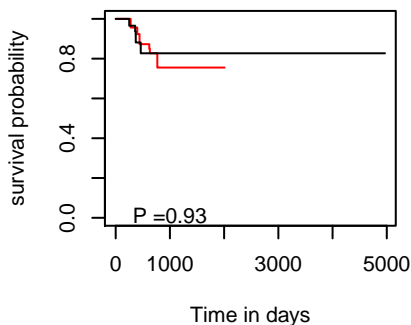**DSS hsa-mir-3653**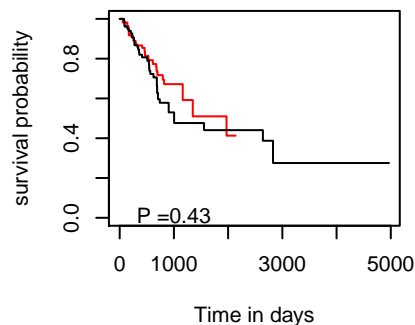

**OS hsa-mir-31**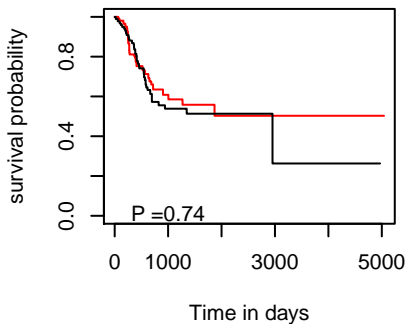**PFI hsa-mir-31**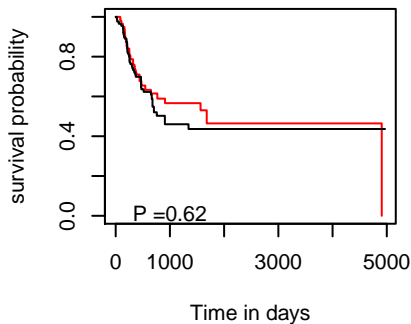**DFI hsa-mir-31**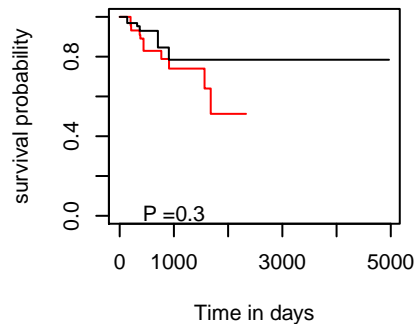**DSS hsa-mir-31**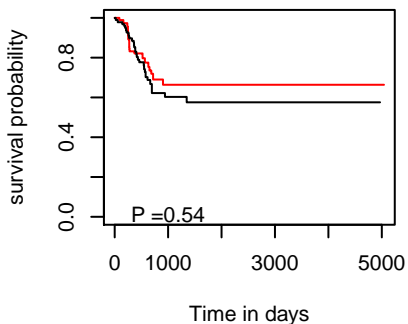**OS hsa-mir-873**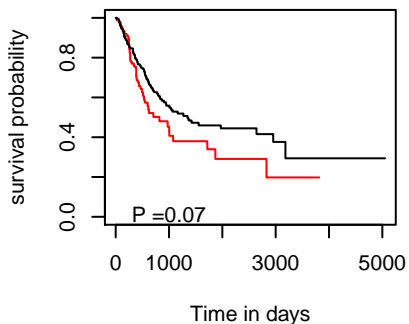**PFI hsa-mir-873**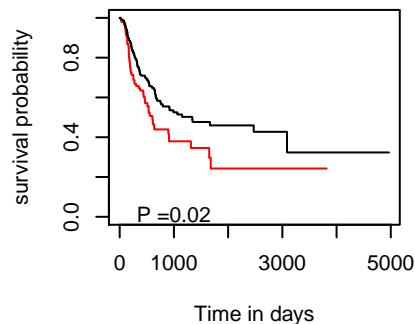**DFI hsa-mir-873**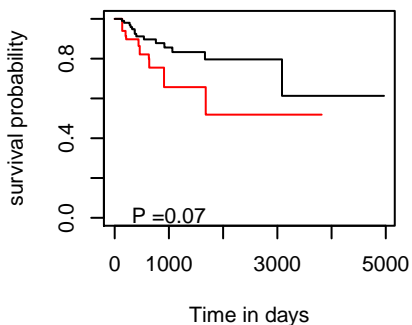**DSS hsa-mir-873**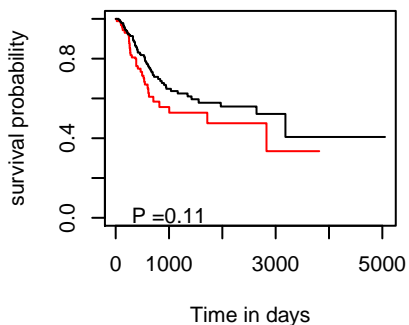**OS hsa-mir-6503**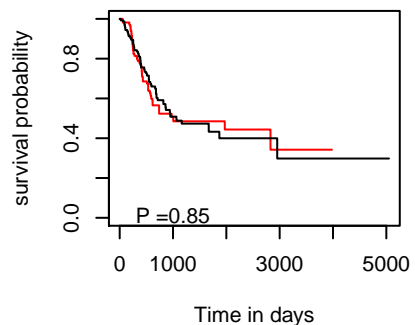

**PFI hsa-mir-6503**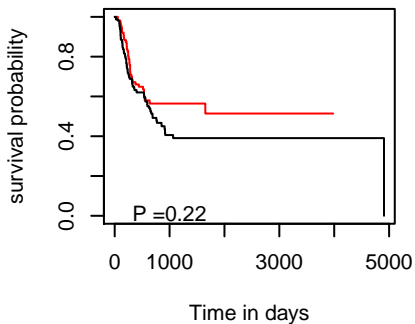**DFI hsa-mir-6503**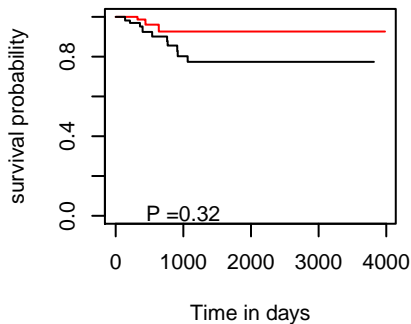**DSS hsa-mir-6503**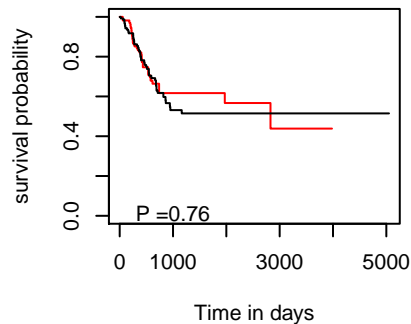**OS hsa-mir-708**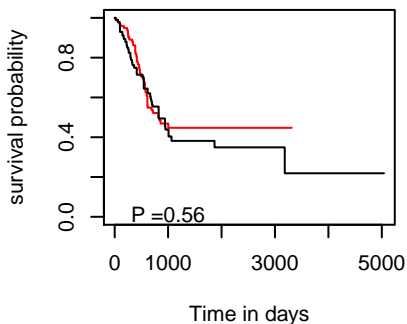**PFI hsa-mir-708**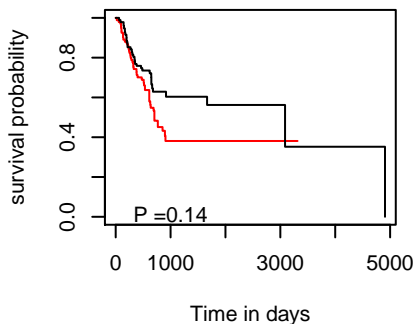**DFI hsa-mir-708**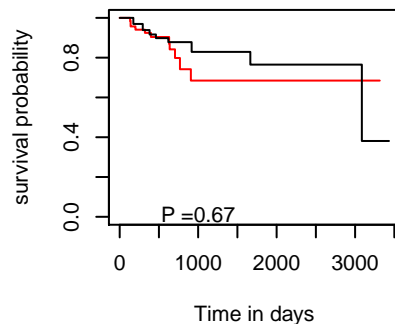**DSS hsa-mir-708**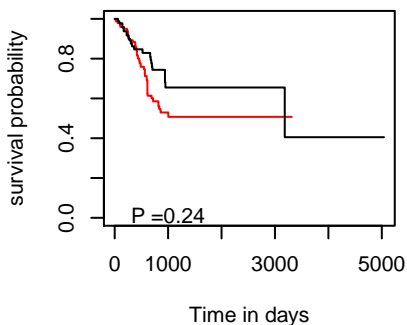**OS hsa-mir-139**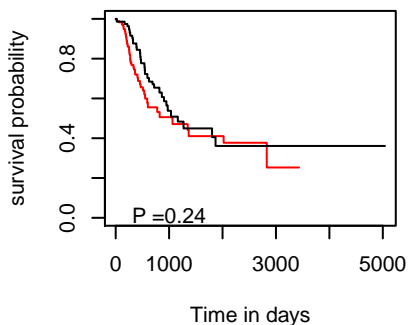**PFI hsa-mir-139**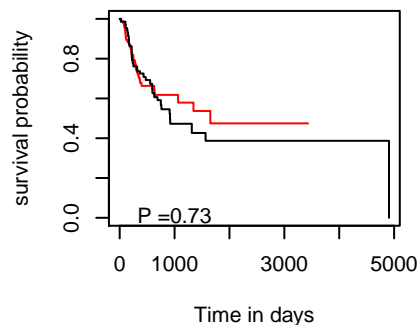

**DFI hsa-mir-139**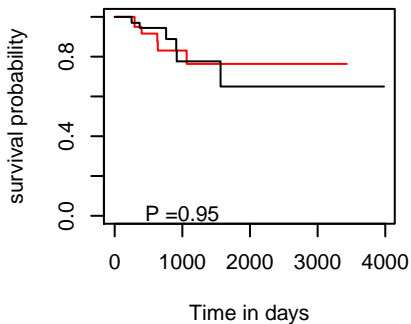**DSS hsa-mir-139**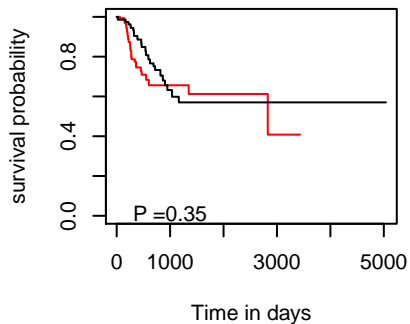**OS hsa-mir-548k**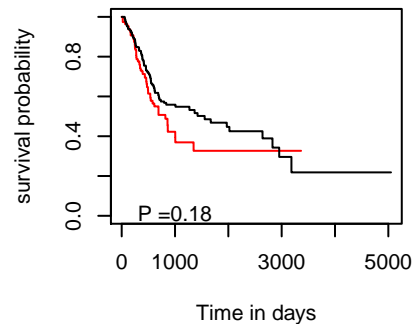**PFI hsa-mir-548k**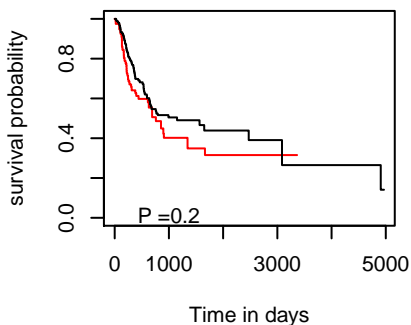**DFI hsa-mir-548k**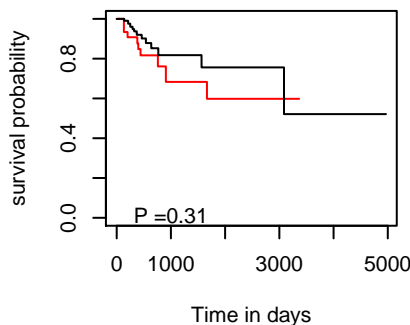**DSS hsa-mir-548k**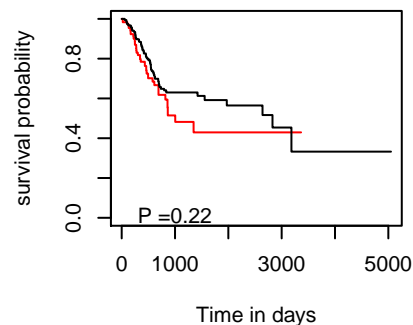**OS hsa-mir-4724**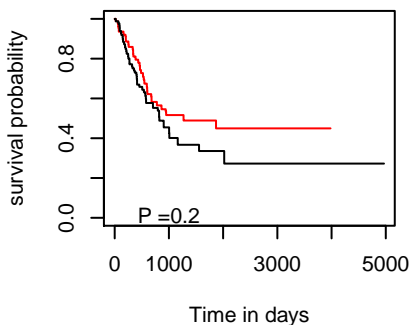**PFI hsa-mir-4724**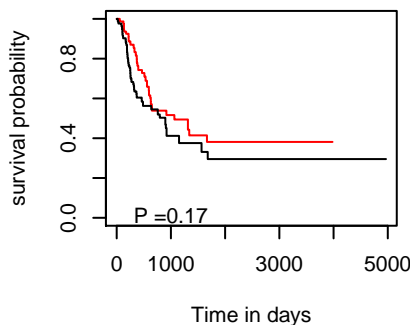**DFI hsa-mir-4724**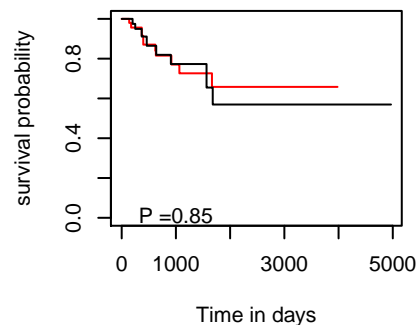

**DSS hsa-mir-4724**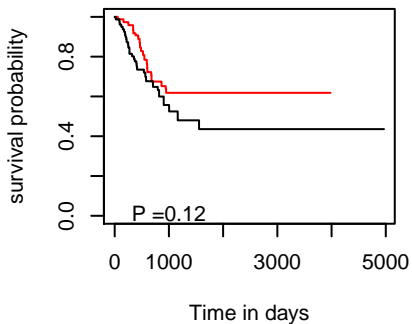**OS hsa-mir-423**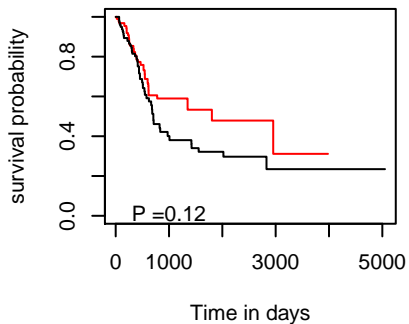**PFI hsa-mir-423**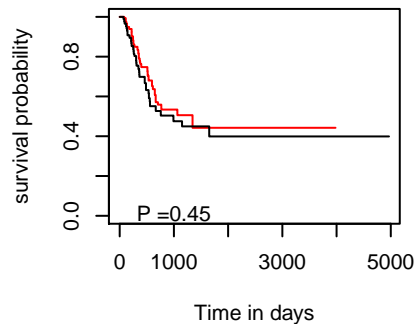**DFI hsa-mir-423**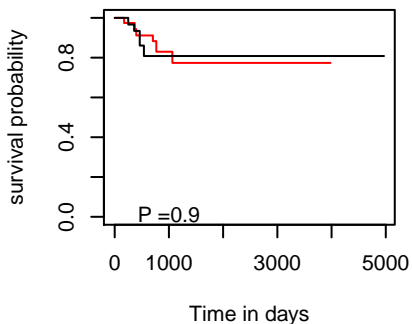**DSS hsa-mir-423**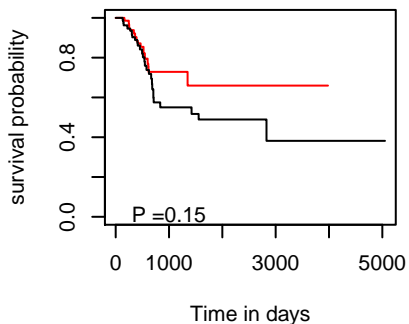**OS hsa-mir-486**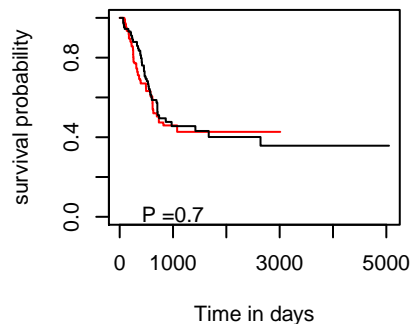**PFI hsa-mir-486**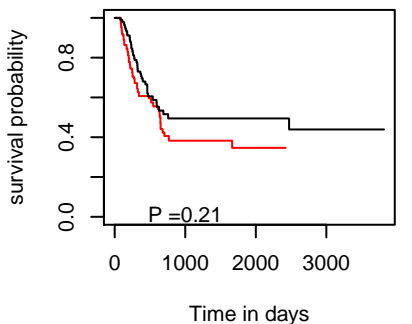**DFI hsa-mir-486**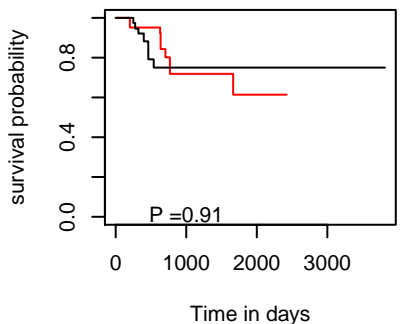**DSS hsa-mir-486**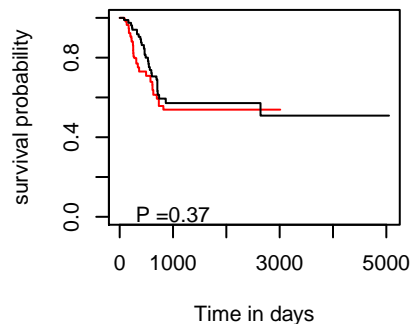

**OS hsa-mir-1227**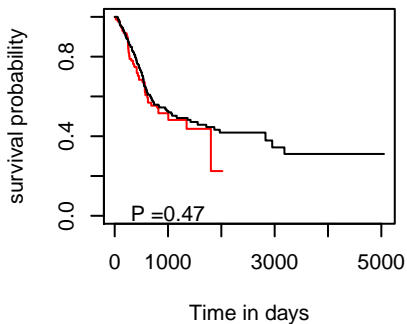**PFI hsa-mir-1227**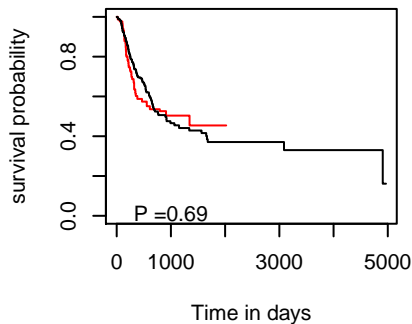**DFI hsa-mir-1227**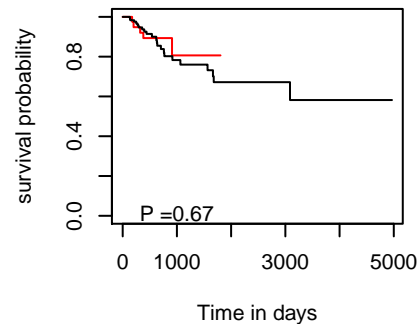**DSS hsa-mir-1227**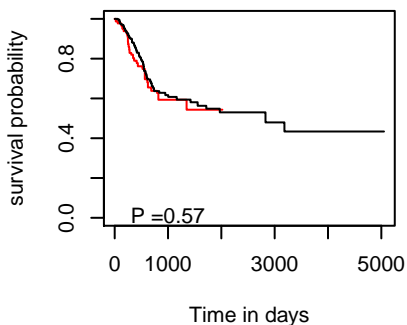**OS hsa-mir-1229**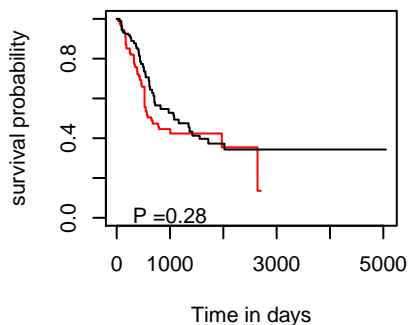**PFI hsa-mir-1229**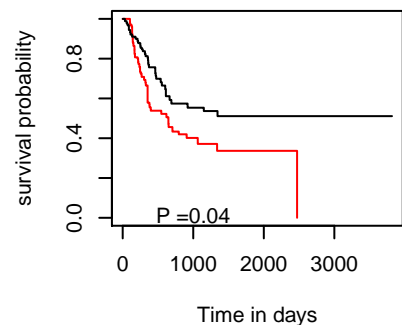**DFI hsa-mir-1229**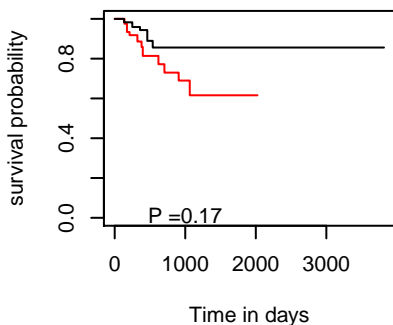**DSS hsa-mir-1229**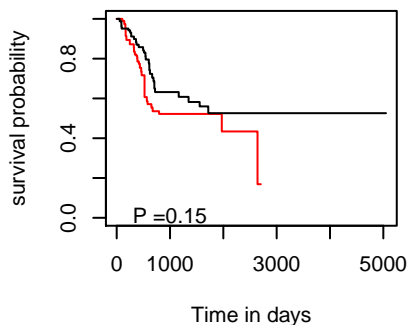**OS hsa-mir-4745**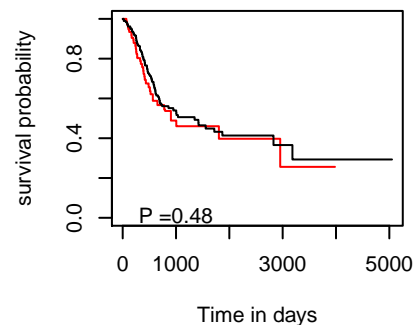

**PFI hsa-mir-4745**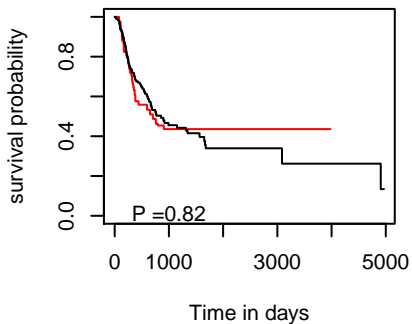**DFI hsa-mir-4745**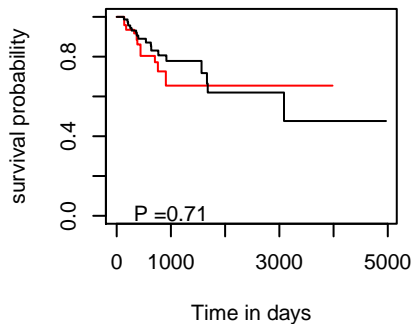**DSS hsa-mir-4745**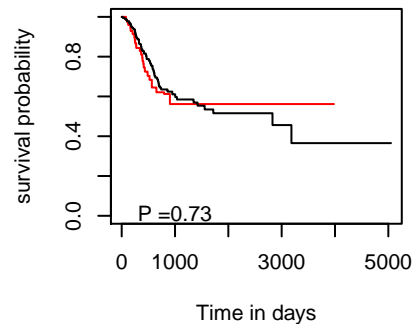**OS hsa-mir-6885**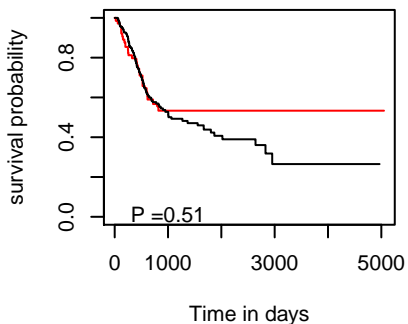**PFI hsa-mir-6885**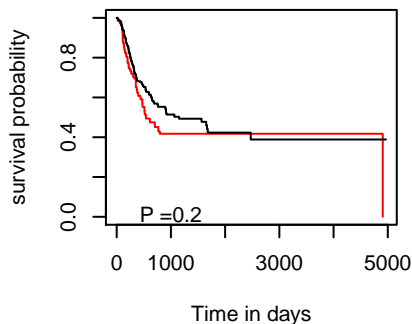**DFI hsa-mir-6885**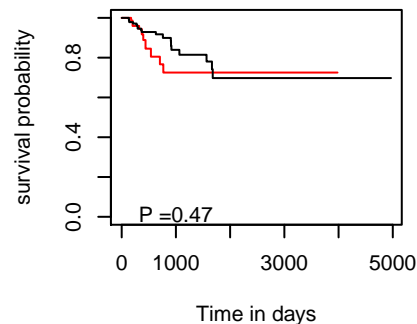**DSS hsa-mir-6885**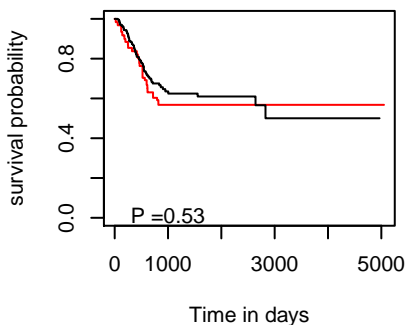**OS hsa-mir-153-2**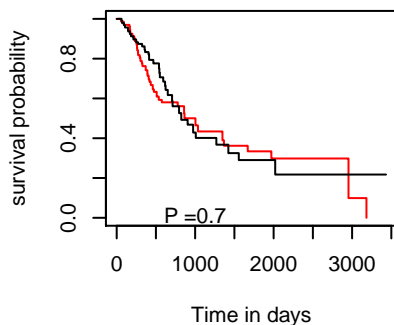**PFI hsa-mir-153-2**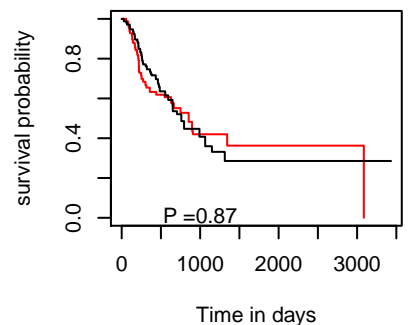

**DFI hsa-mir-153-2**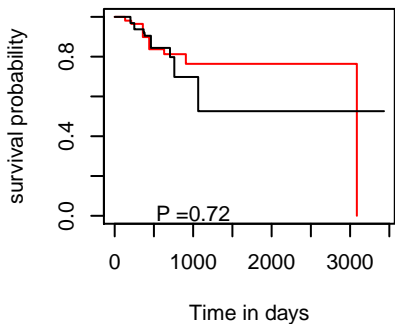**DSS hsa-mir-153-2**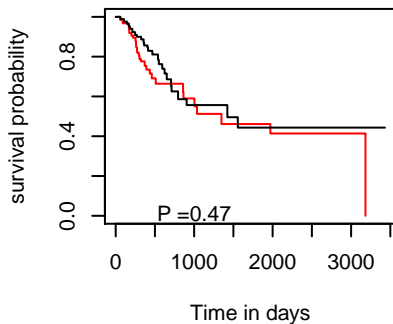**OS hsa-mir-3150b**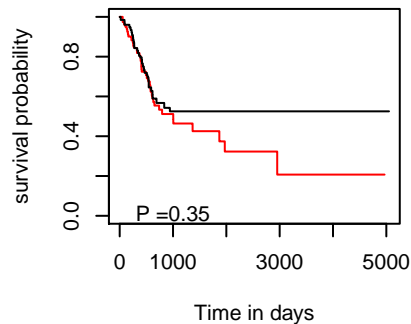**PFI hsa-mir-3150b**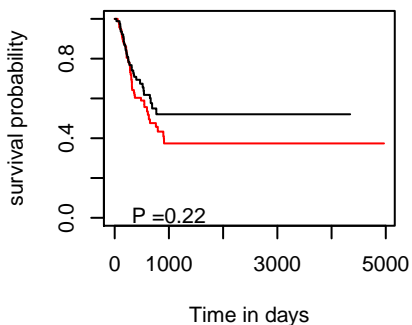**DFI hsa-mir-3150b**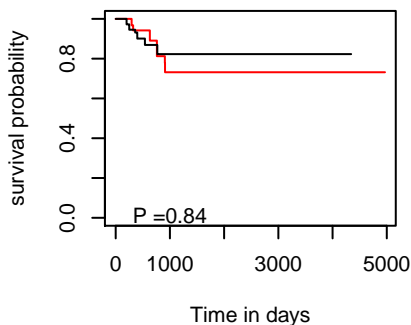**DSS hsa-mir-3150b**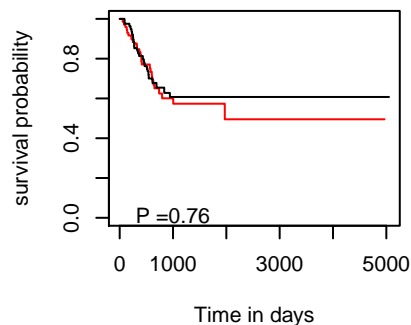**OS hsa-mir-378i**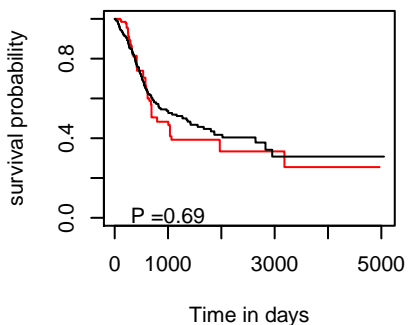**PFI hsa-mir-378i**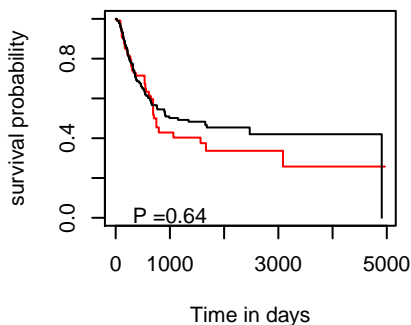**DFI hsa-mir-378i**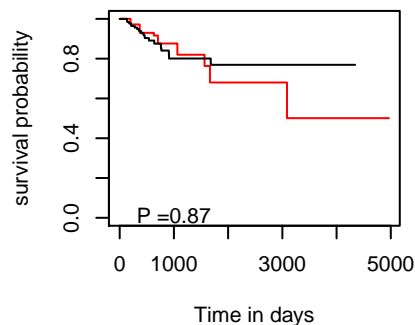

**DSS hsa-mir-378i**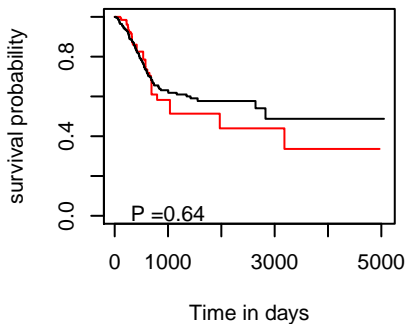**OS hsa-mir-449a**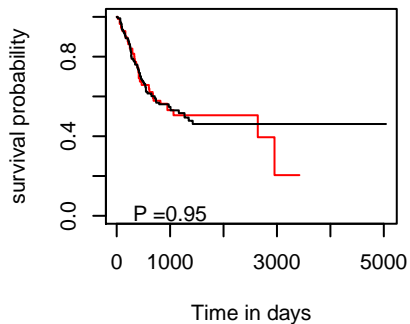**PFI hsa-mir-449a**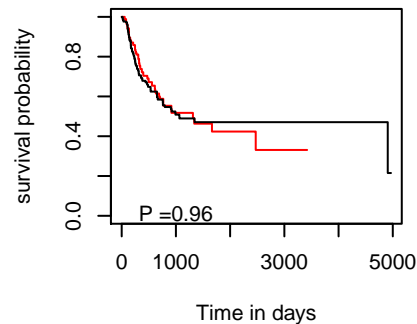**DFI hsa-mir-449a**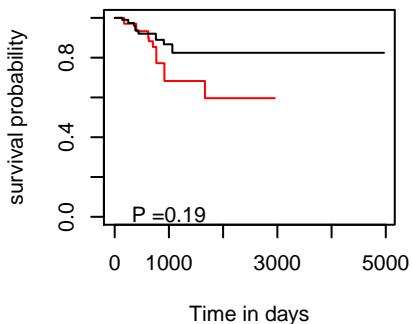**DSS hsa-mir-449a**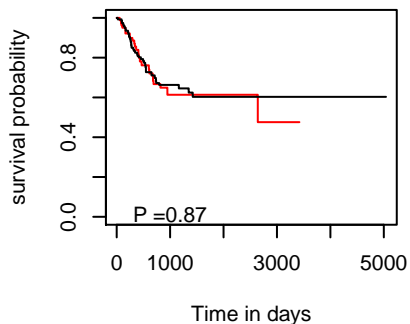**OS hsa-mir-4791**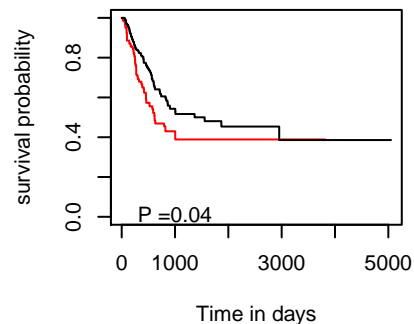**PFI hsa-mir-4791**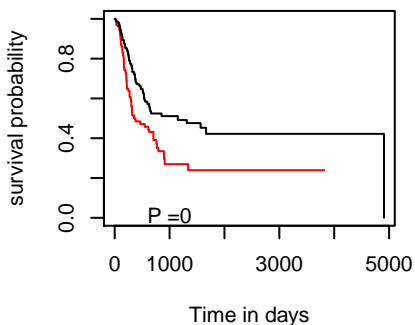**DFI hsa-mir-4791**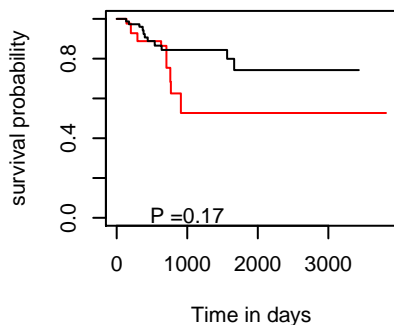**DSS hsa-mir-4791**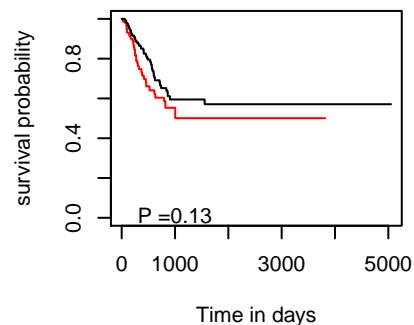

**OS hsa-mir-5683**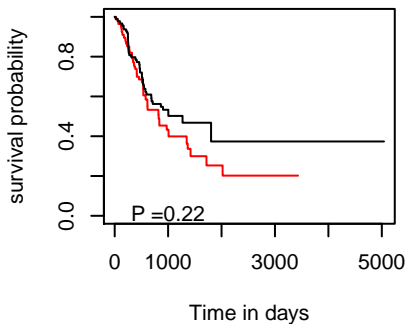**PFI hsa-mir-5683**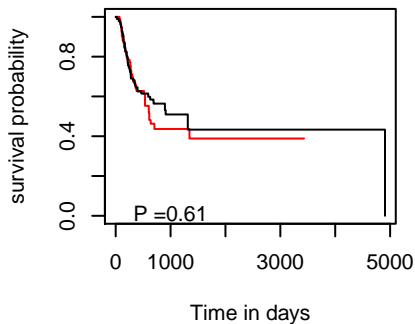**DFI hsa-mir-5683**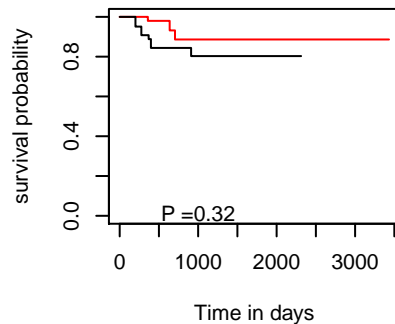**DSS hsa-mir-5683**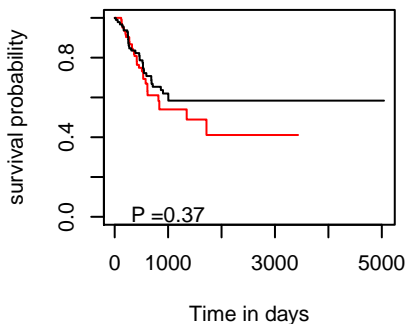**OS hsa-mir-5703**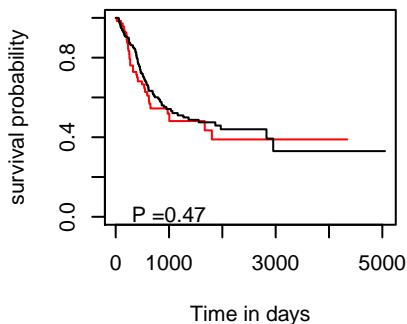**PFI hsa-mir-5703**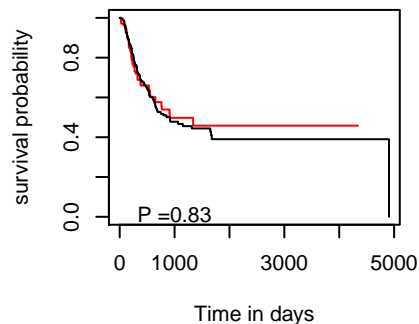**DFI hsa-mir-5703**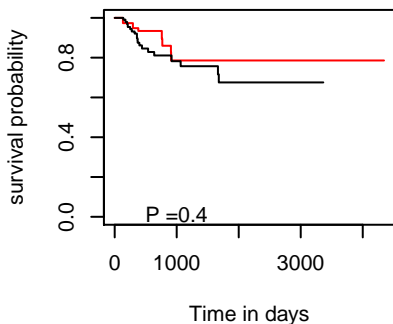**DSS hsa-mir-5703**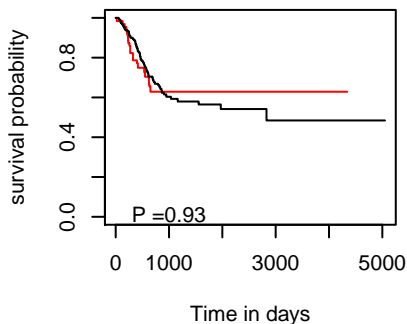**OS hsa-mir-6510**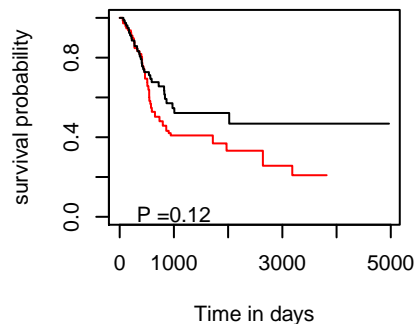

**PFI hsa-mir-6510**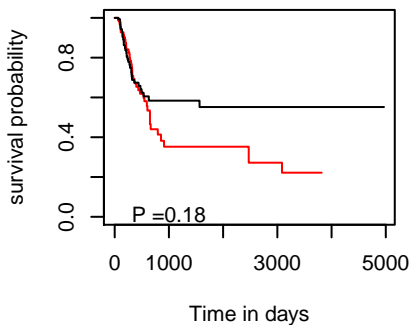**DFI hsa-mir-6510**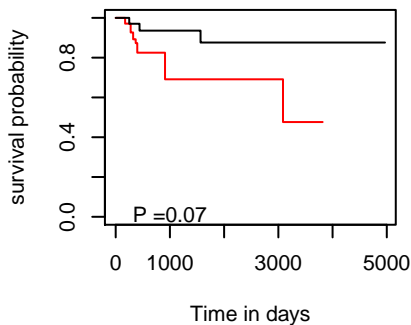**DSS hsa-mir-6510**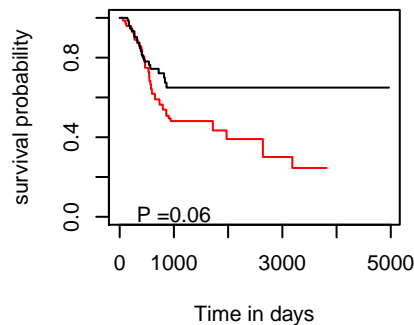**OS hsa-mir-7-3**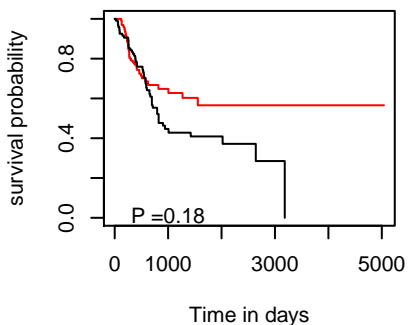**PFI hsa-mir-7-3**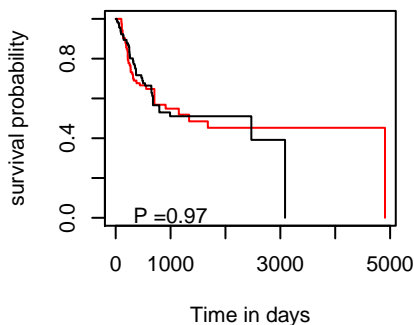**DFI hsa-mir-7-3**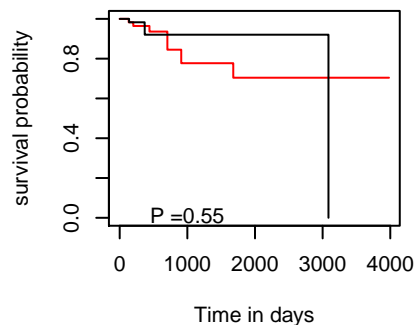**DSS hsa-mir-7-3**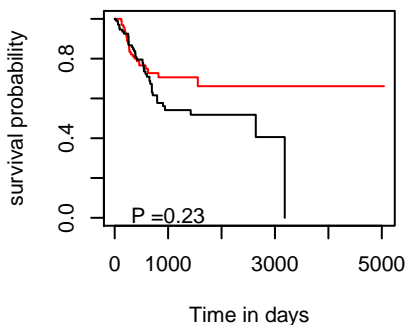**OS hsa-mir-15a**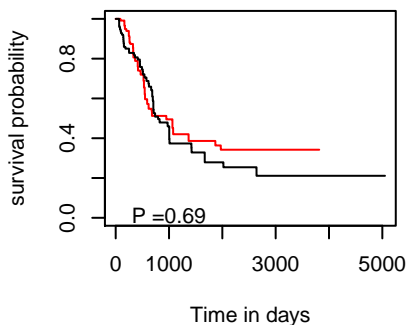**PFI hsa-mir-15a**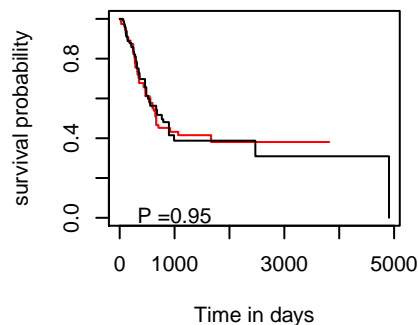

**DFI hsa-mir-15a**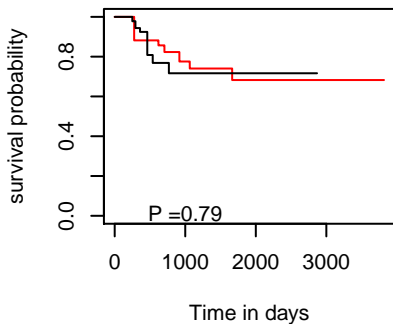**DSS hsa-mir-15a**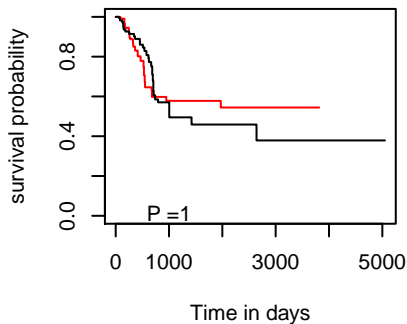**OS hsa-let-7a-3**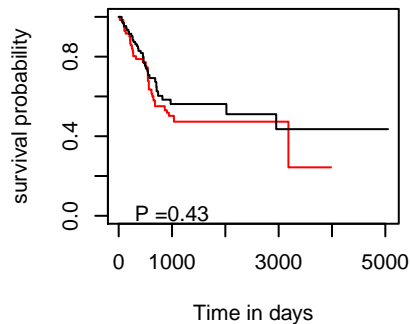**PFI hsa-let-7a-3**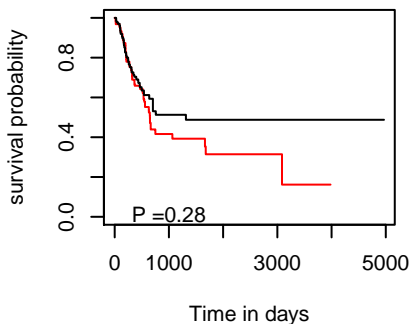**DFI hsa-let-7a-3**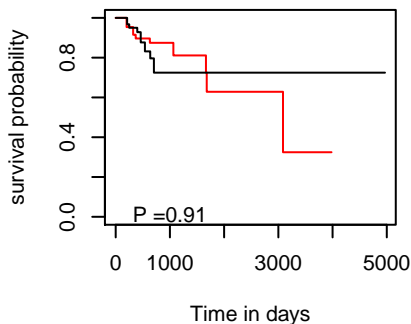**DSS hsa-let-7a-3**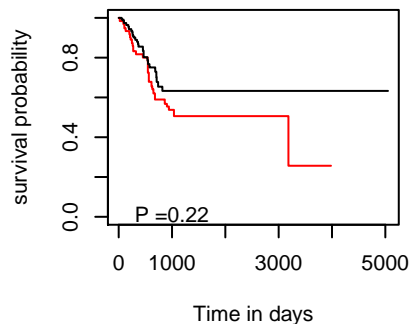**OS hsa-mir-4647**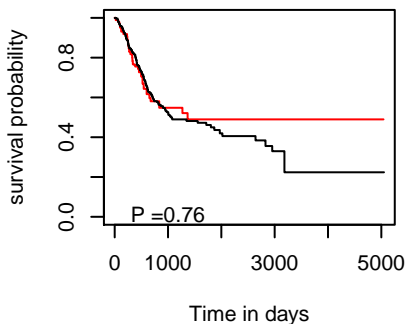**PFI hsa-mir-4647**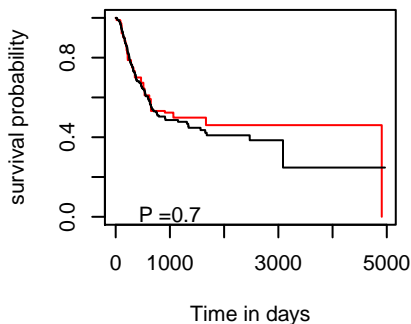**DFI hsa-mir-4647**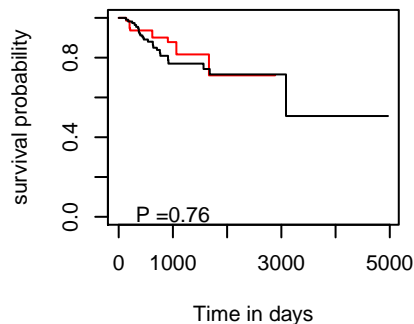

**DSS hsa-mir-4647**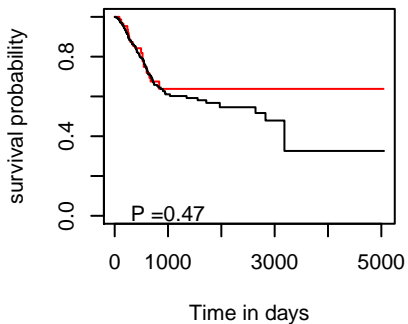**OS hsa-mir-943**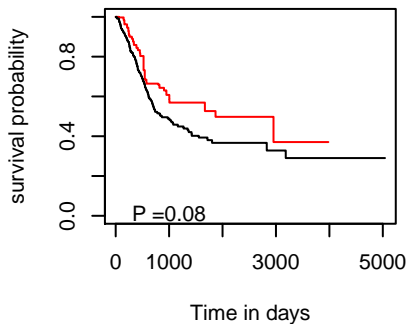**PFI hsa-mir-943**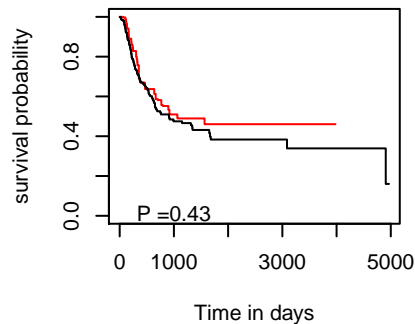**DFI hsa-mir-943**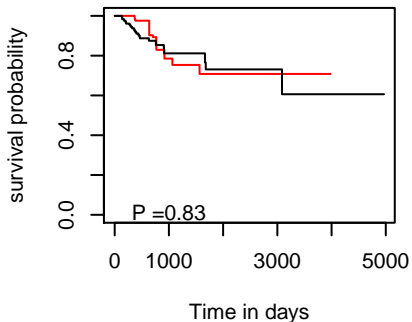**DSS hsa-mir-943**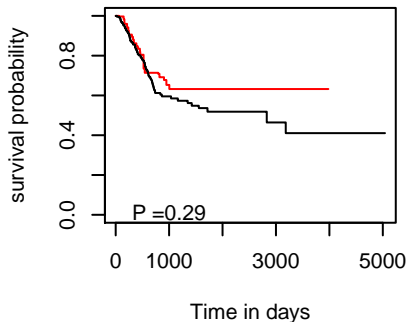**OS hsa-mir-4662a**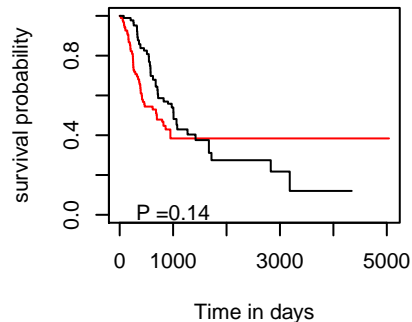**PFI hsa-mir-4662a**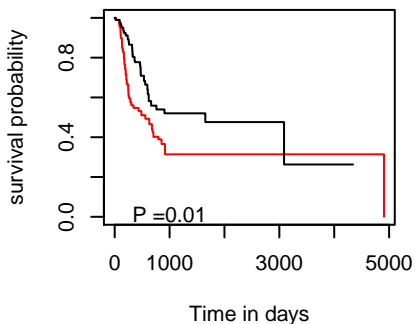**DFI hsa-mir-4662a**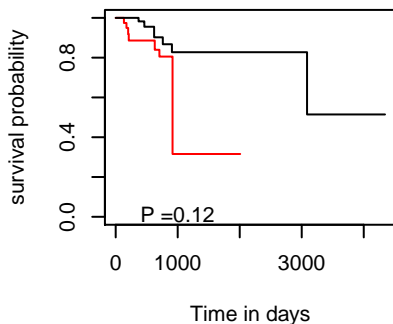**DSS hsa-mir-4662a**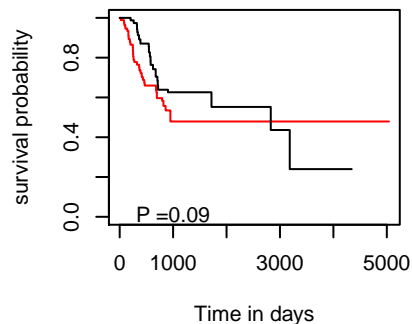

**OS hsa-mir-885**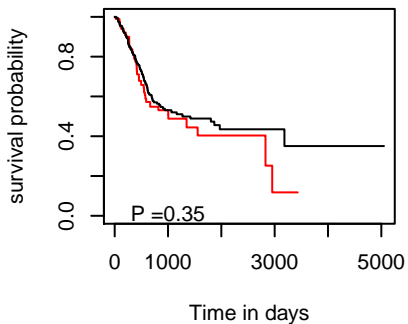**PFI hsa-mir-885**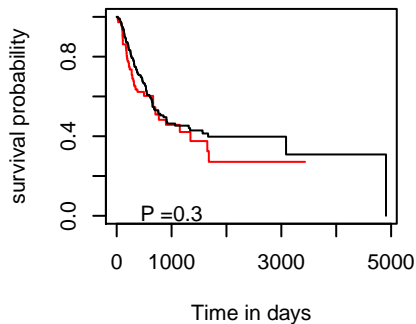**DFI hsa-mir-885**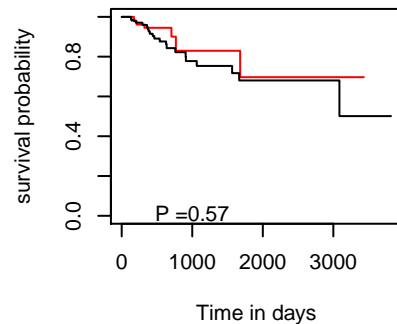**DSS hsa-mir-885**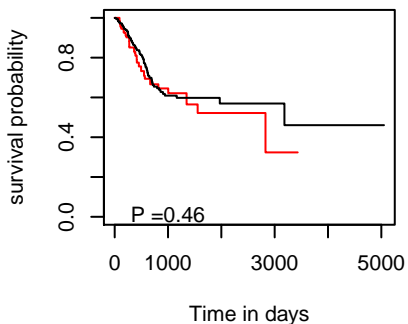**OS hsa-mir-1247**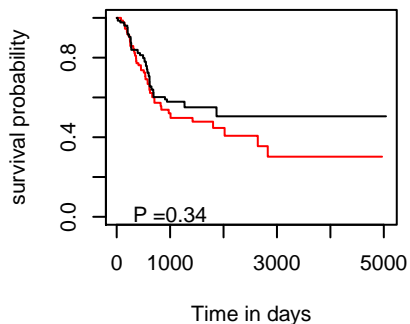**PFI hsa-mir-1247**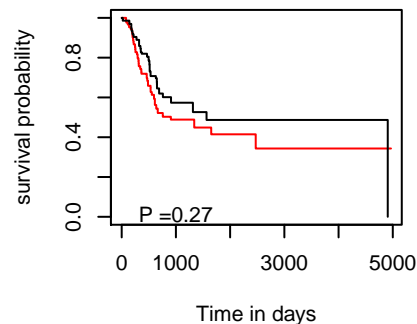**DFI hsa-mir-1247**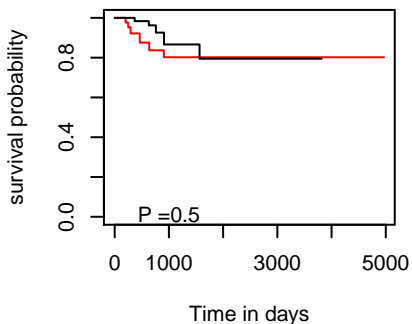**DSS hsa-mir-1247**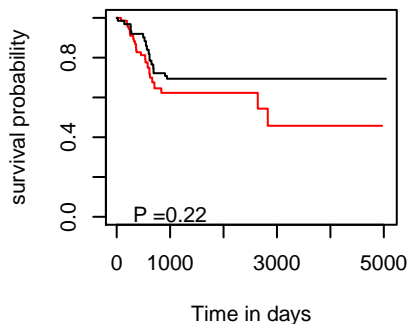**OS hsa-mir-301b**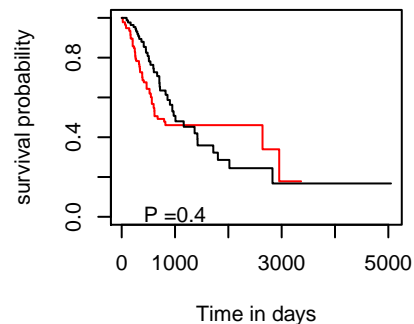

**PFI hsa-mir-301b**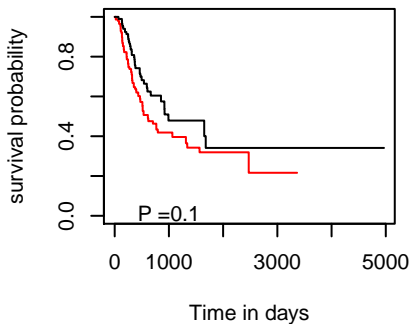**DFI hsa-mir-301b**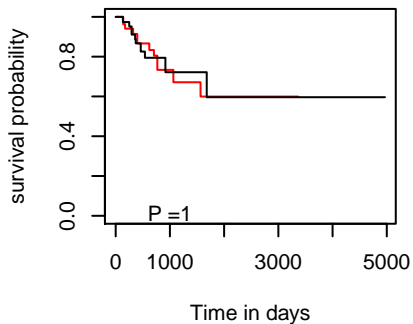**DSS hsa-mir-301b**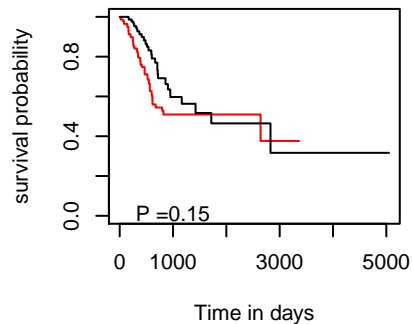**OS hsa-mir-4732**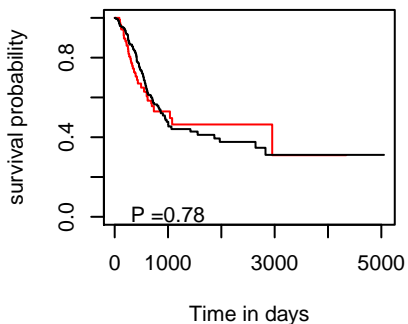**PFI hsa-mir-4732**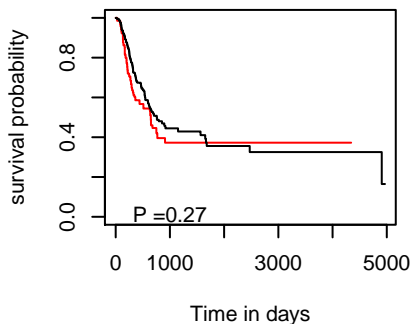**DFI hsa-mir-4732**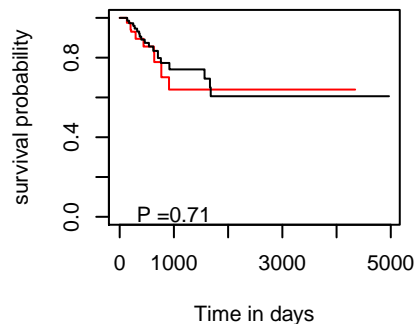**DSS hsa-mir-4732**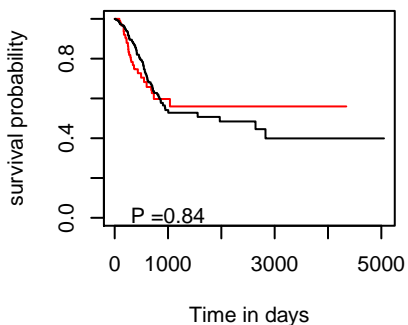**OS hsa-mir-4733**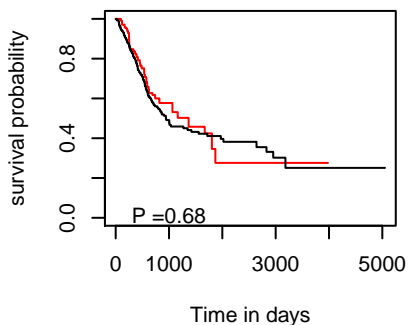**PFI hsa-mir-4733**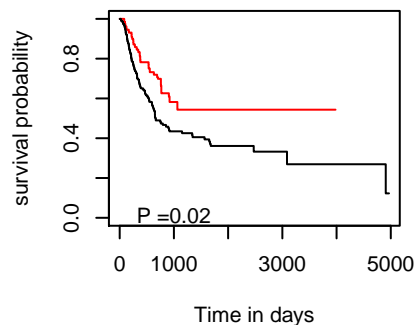

**DFI hsa-mir-4733**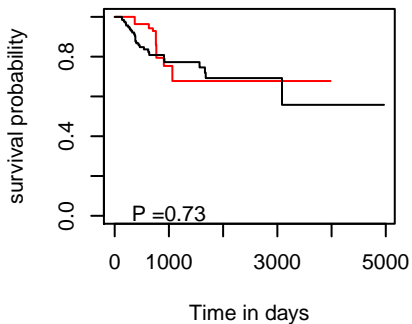**DSS hsa-mir-4733**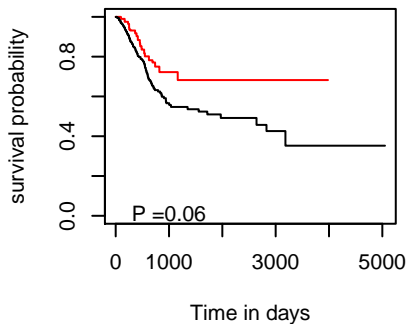**OS hsa-mir-1306**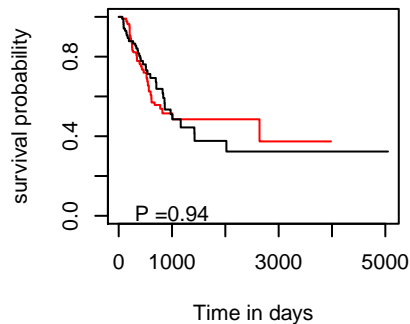**PFI hsa-mir-1306**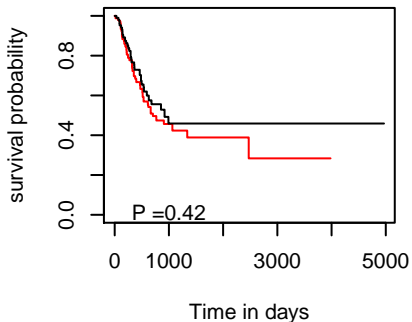**DFI hsa-mir-1306**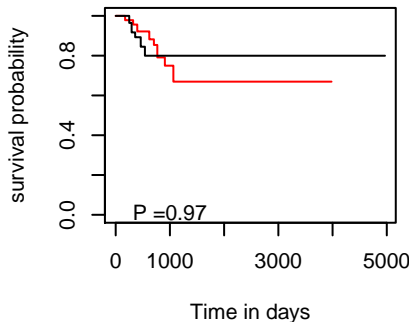**DSS hsa-mir-1306**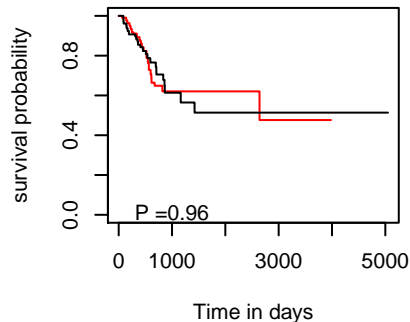**OS hsa-mir-6818**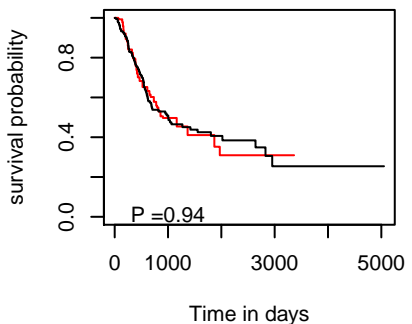**PFI hsa-mir-6818**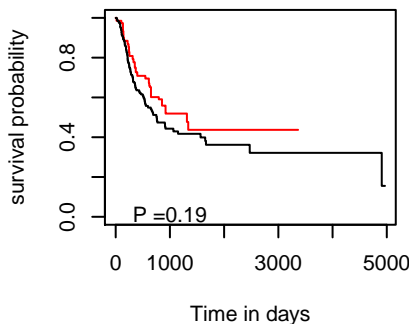**DFI hsa-mir-6818**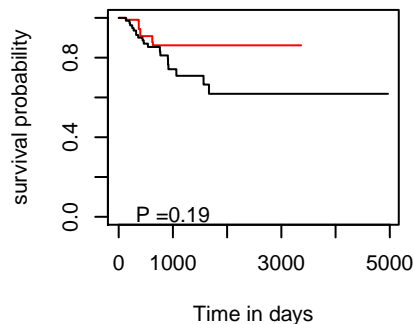



**OS hsa-mir-203b**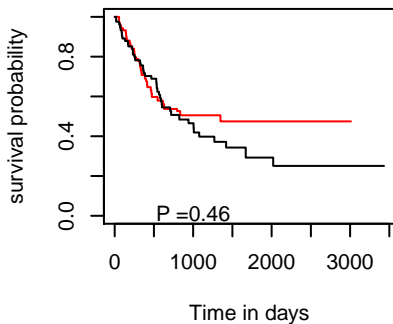**PFI hsa-mir-203b**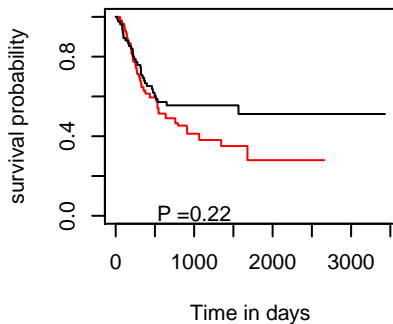**DFI hsa-mir-203b**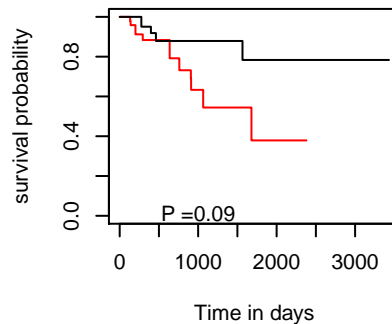**DSS hsa-mir-203b**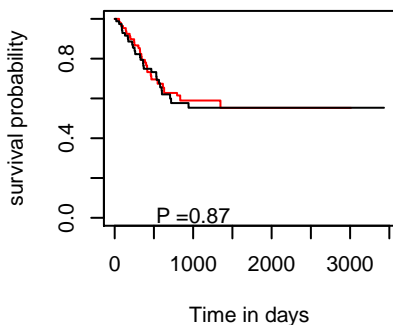**OS hsa-mir-3200**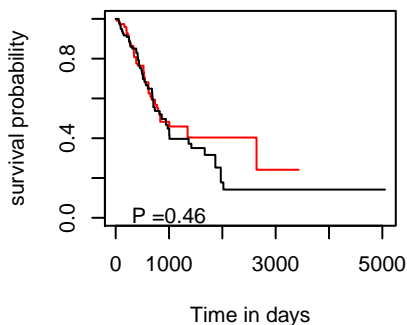**PFI hsa-mir-3200**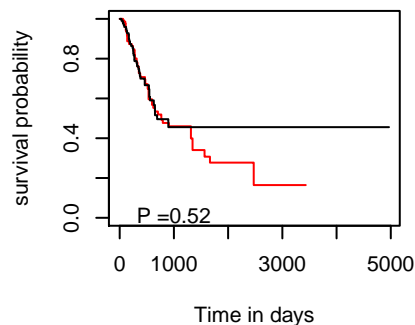**DFI hsa-mir-3200**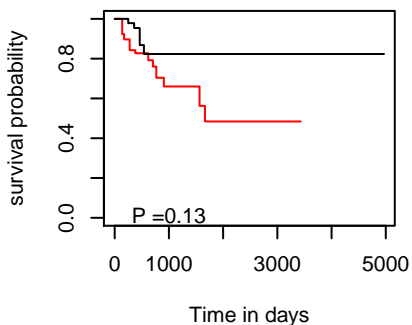**DSS hsa-mir-3200**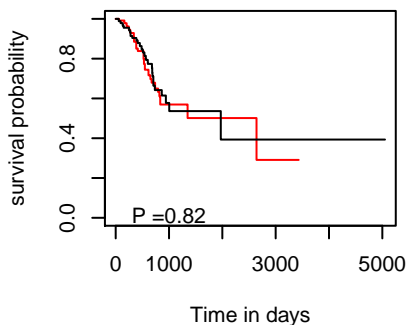**OS hsa-mir-6844**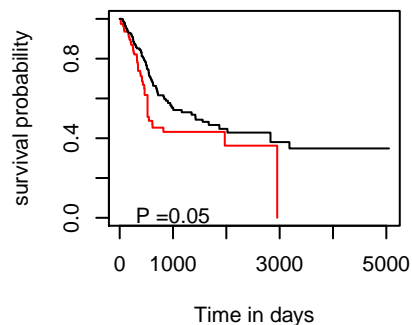

**PFI hsa-mir-6844**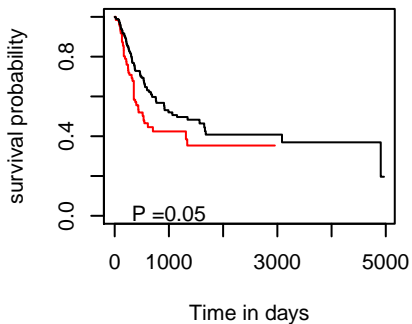**DFI hsa-mir-6844**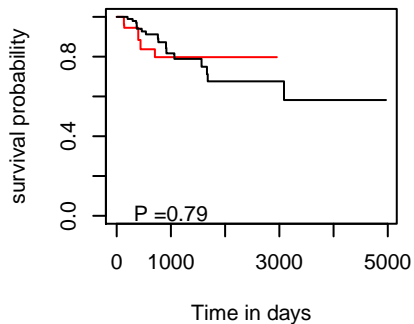**DSS hsa-mir-6844**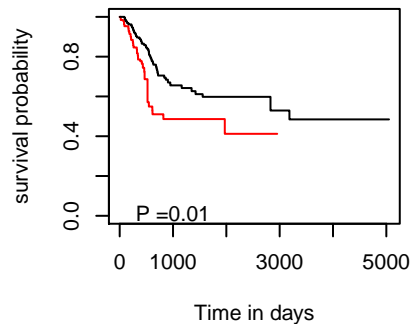**OS hsa-mir-4746**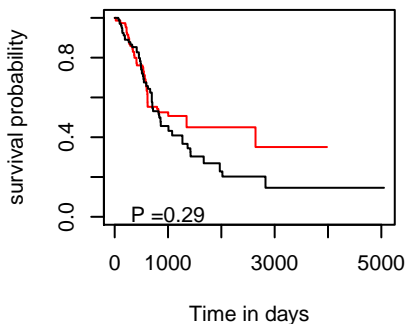**PFI hsa-mir-4746**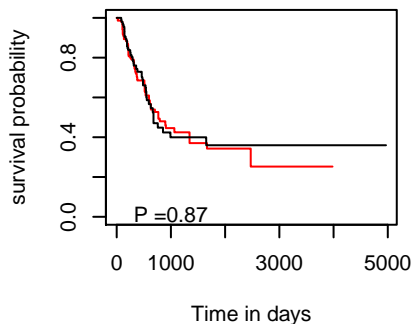**DFI hsa-mir-4746**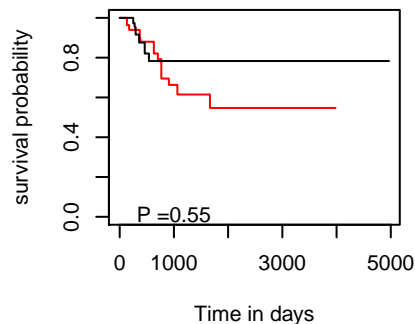**DSS hsa-mir-4746**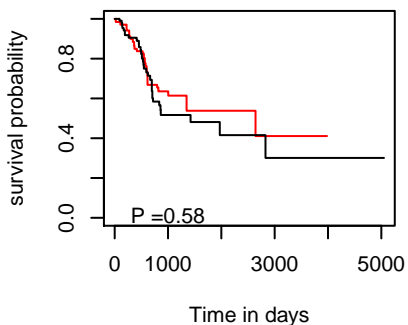**OS hsa-mir-451a**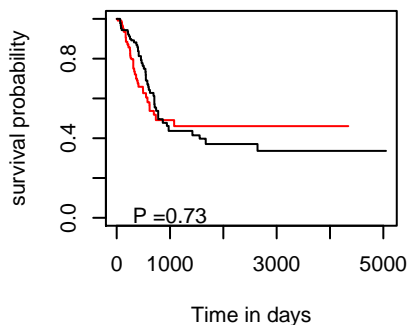**PFI hsa-mir-451a**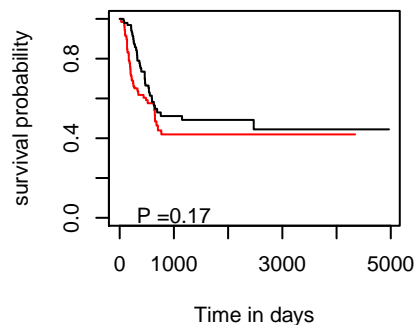

**DFI hsa-mir-451a**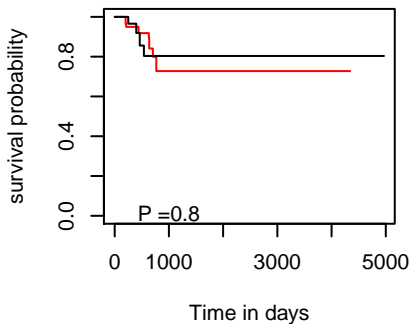**DSS hsa-mir-451a**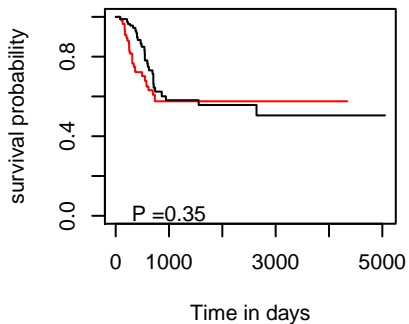**OS hsa-mir-6805**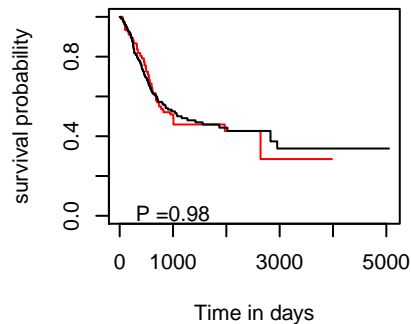**PFI hsa-mir-6805**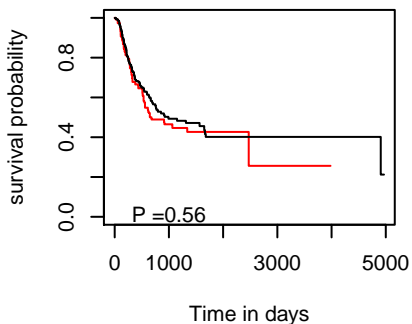**DFI hsa-mir-6805**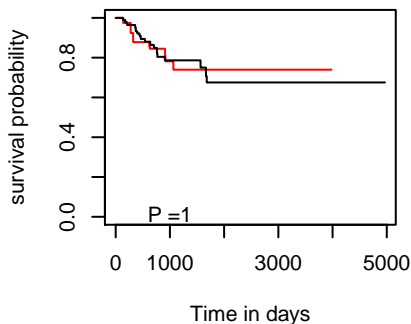**DSS hsa-mir-6805**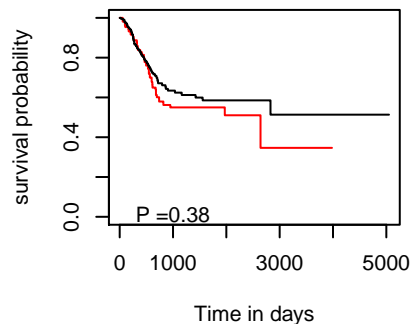**OS hsa-mir-6731**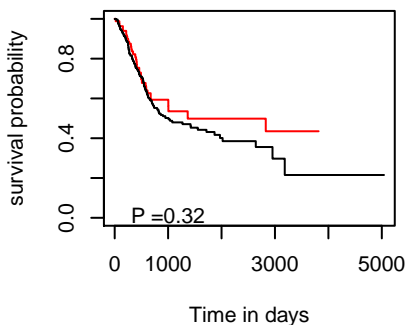**PFI hsa-mir-6731**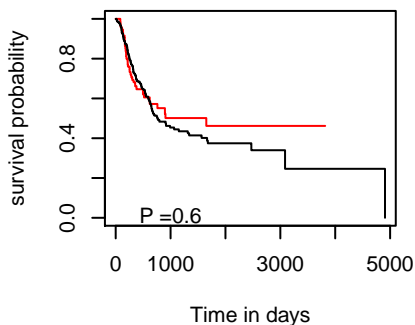**DFI hsa-mir-6731**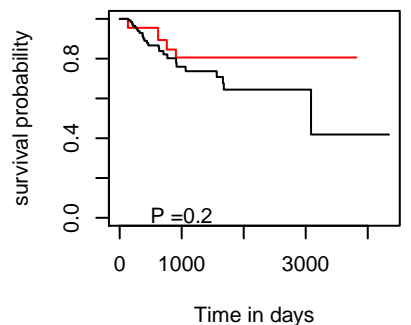

**DSS hsa-mir-6731**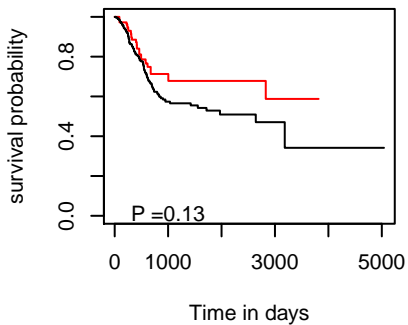**OS hsa-mir-6754**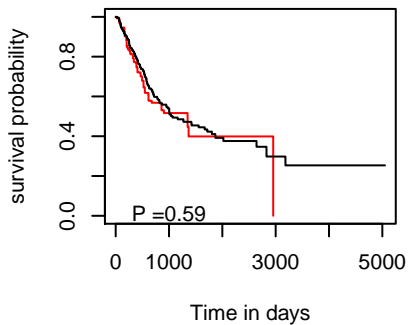**PFI hsa-mir-6754**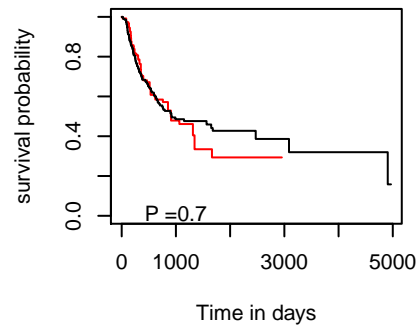**DFI hsa-mir-6754**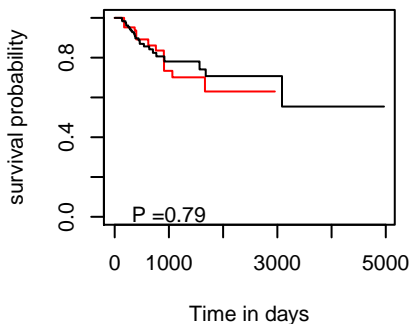**DSS hsa-mir-6754**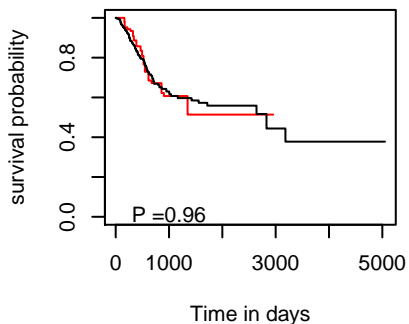**OS hsa-mir-940**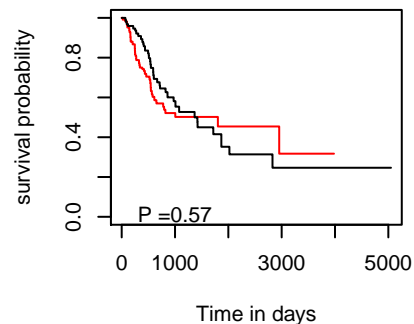**PFI hsa-mir-940**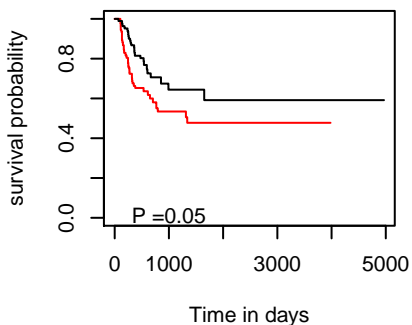**DFI hsa-mir-940**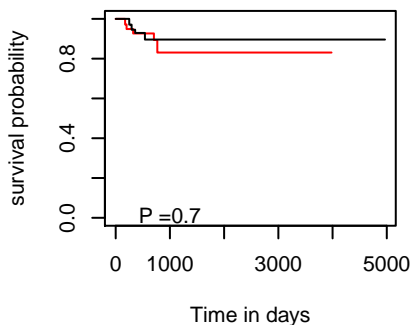**DSS hsa-mir-940**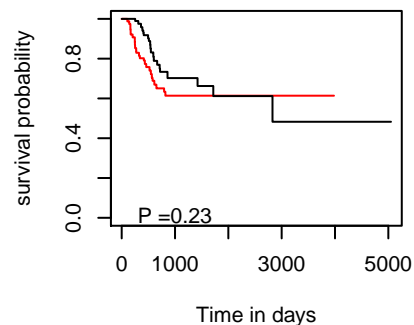

**OS hsa-mir-3618**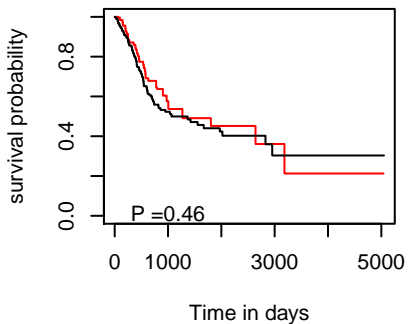**PFI hsa-mir-3618**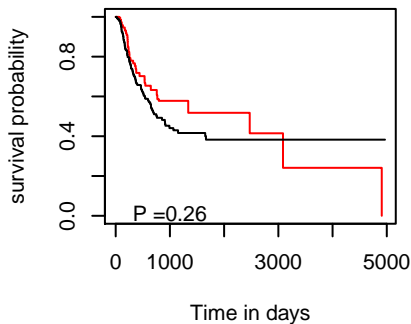**DFI hsa-mir-3618**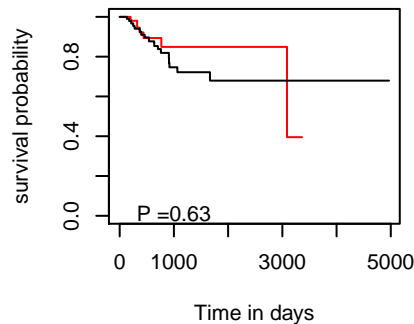**DSS hsa-mir-3618**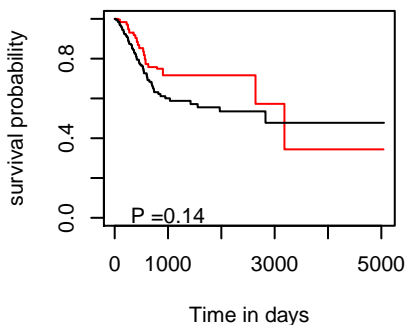**OS hsa-mir-3177**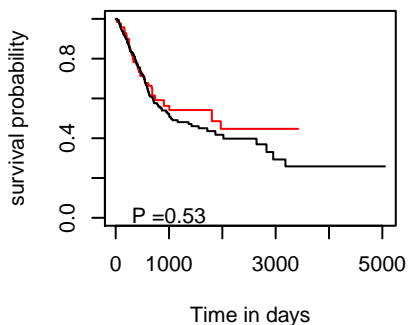**PFI hsa-mir-3177**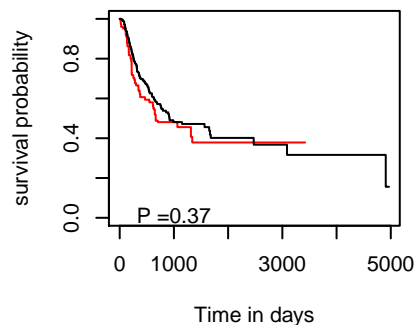**DFI hsa-mir-3177**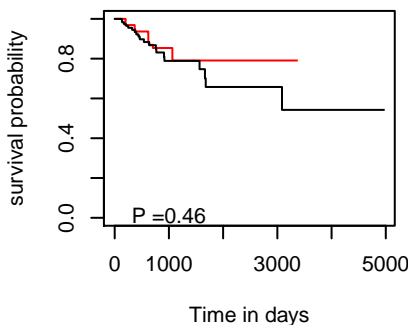**DSS hsa-mir-3177**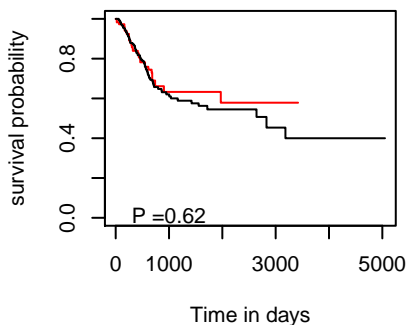**OS hsa-mir-3610**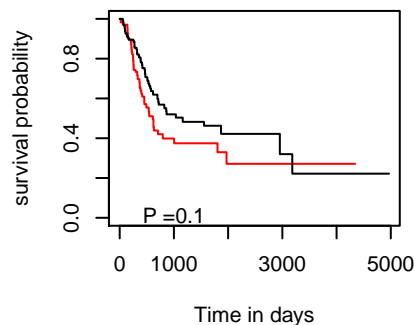

**PFI hsa-mir-3610**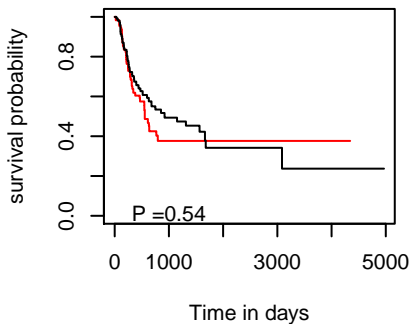**DFI hsa-mir-3610**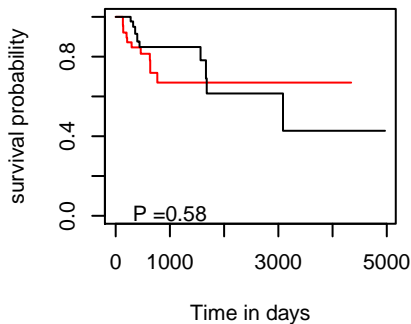**DSS hsa-mir-3610**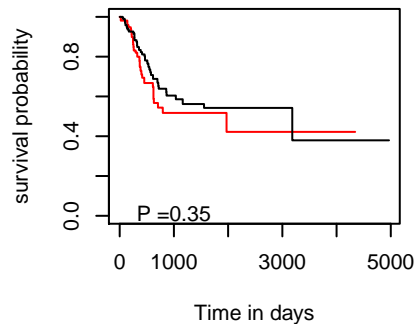**OS hsa-mir-3677**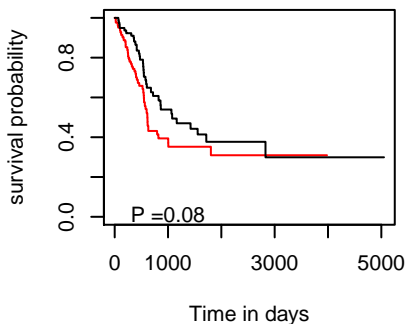**PFI hsa-mir-3677**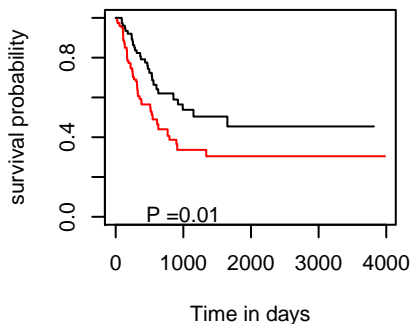**DFI hsa-mir-3677**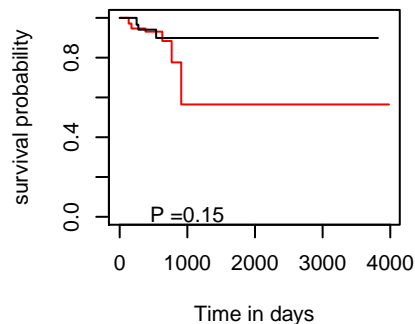**DSS hsa-mir-3677**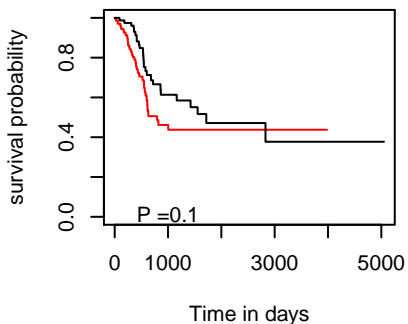**OS hsa-mir-3064**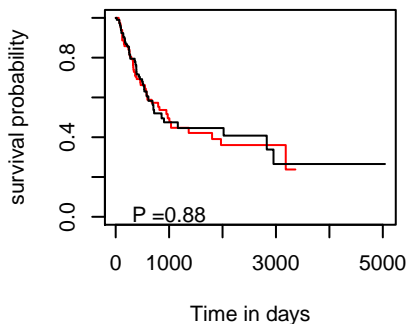**PFI hsa-mir-3064**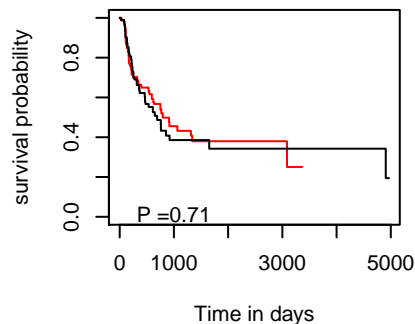

**DFI hsa-mir-3064**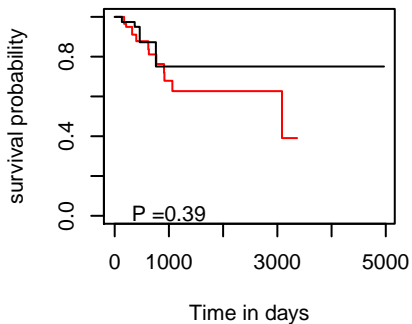**DSS hsa-mir-3064**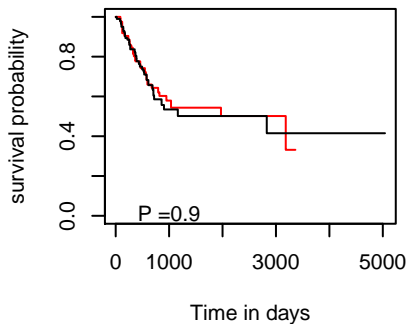**OS hsa-mir-320d-1**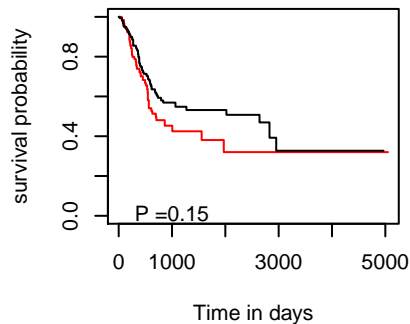**PFI hsa-mir-320d-1**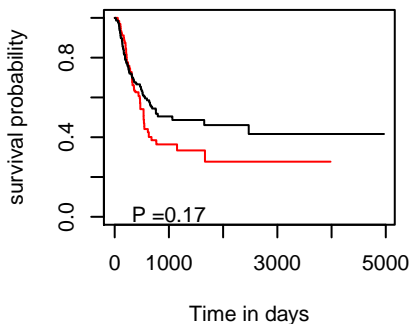**DFI hsa-mir-320d-1**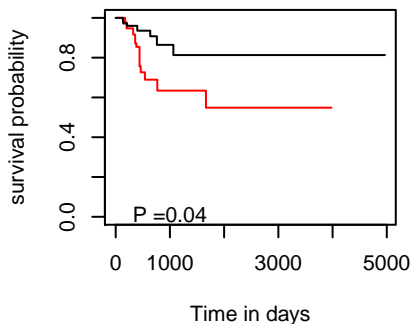**DSS hsa-mir-320d-1**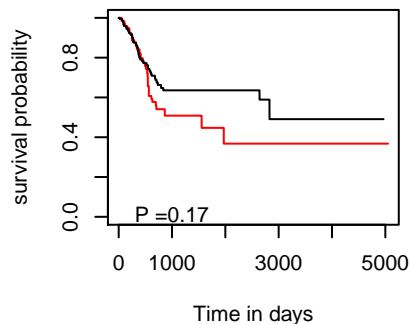**OS hsa-mir-3140**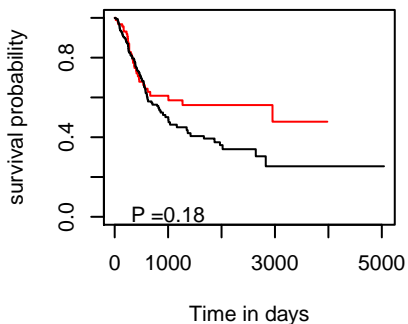**PFI hsa-mir-3140**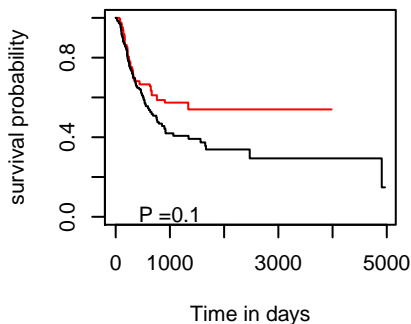**DFI hsa-mir-3140**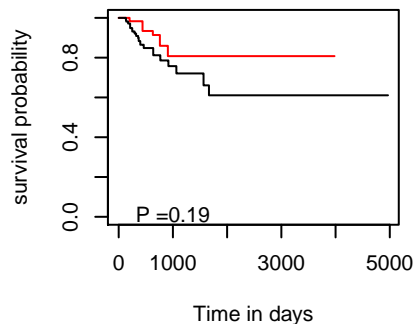

**DSS hsa-mir-3140**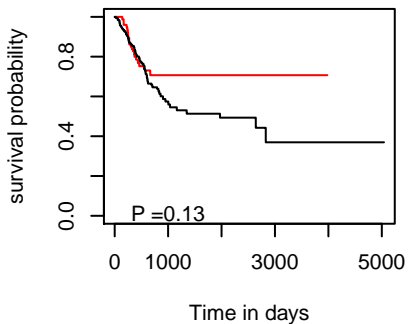**OS hsa-mir-4660**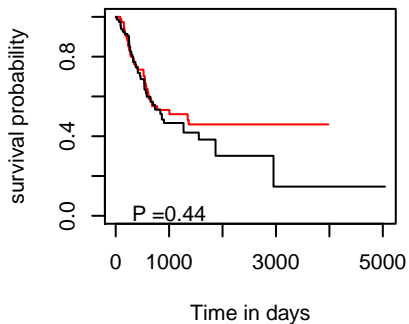**PFI hsa-mir-4660**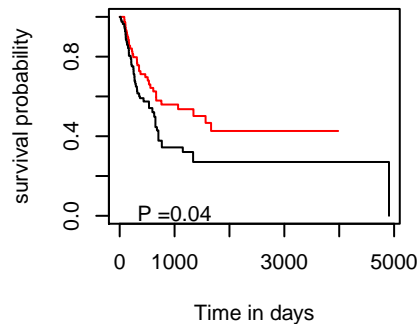**DFI hsa-mir-4660**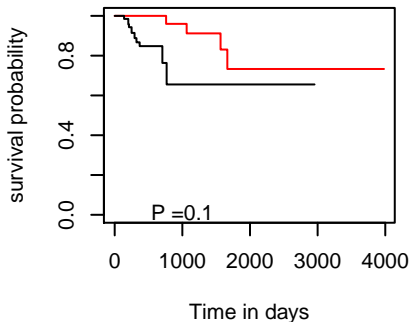**DSS hsa-mir-4660**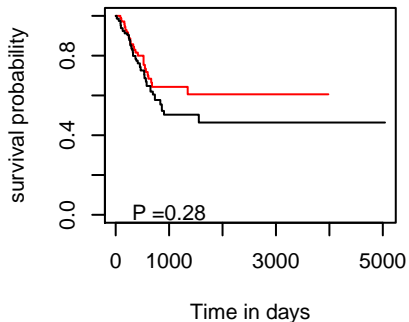**OS hsa-mir-4524a**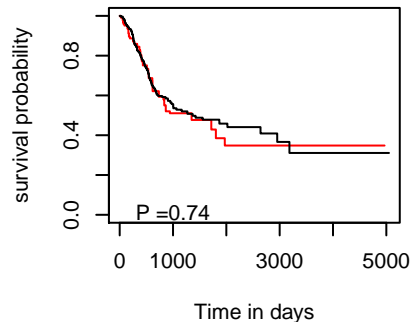**PFI hsa-mir-4524a**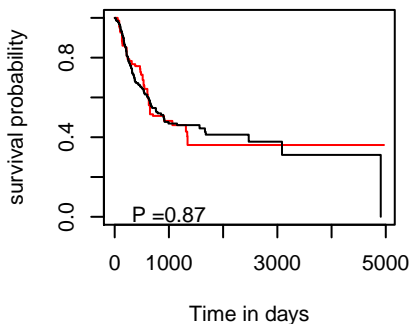**DFI hsa-mir-4524a**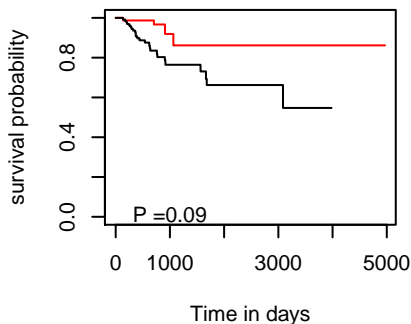**DSS hsa-mir-4524a**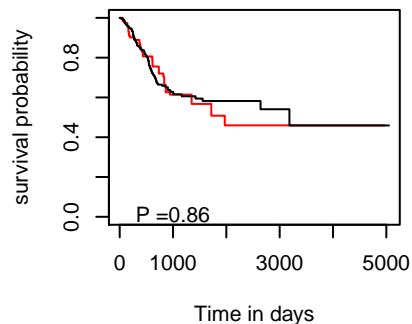

**OS hsa-mir-3664**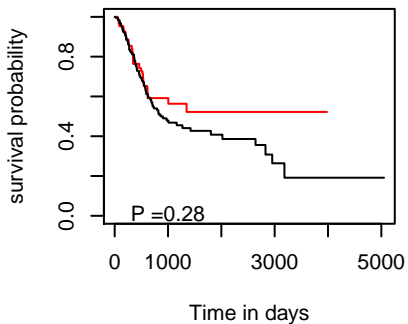**PFI hsa-mir-3664**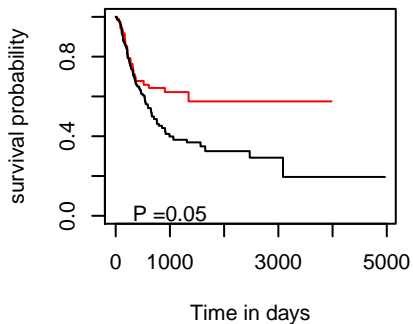**DFI hsa-mir-3664**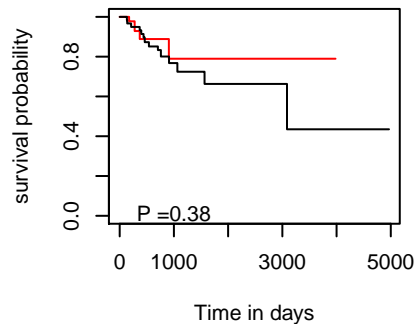**DSS hsa-mir-3664**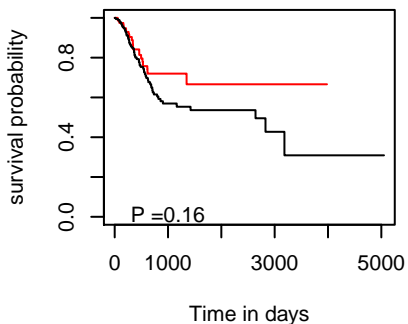**OS hsa-mir-30e**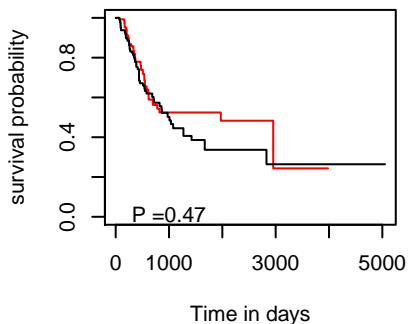**PFI hsa-mir-30e**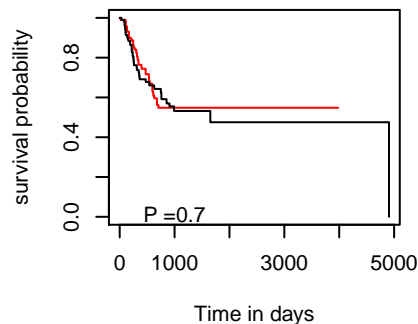**DFI hsa-mir-30e**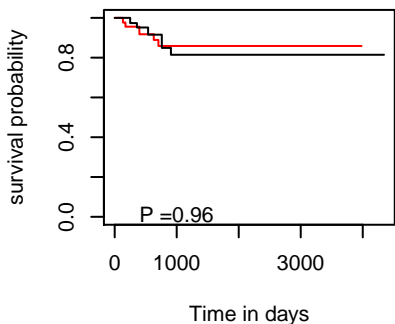**DSS hsa-mir-30e**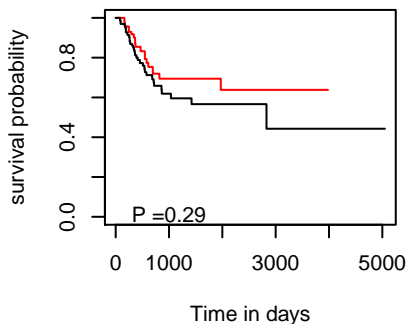**OS hsa-mir-3917**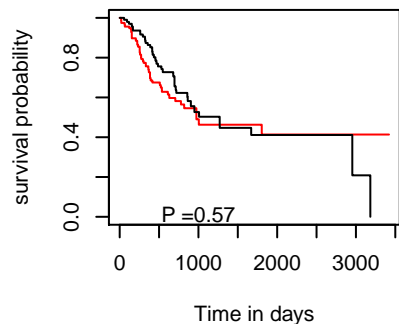

**PFI hsa-mir-3917**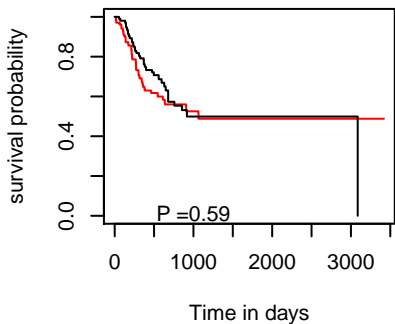**DFI hsa-mir-3917**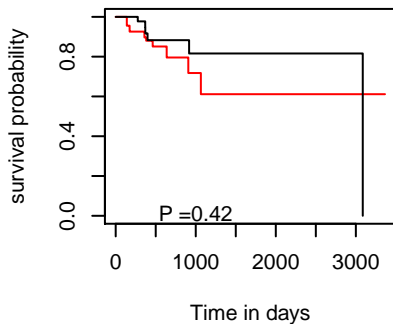**DSS hsa-mir-3917**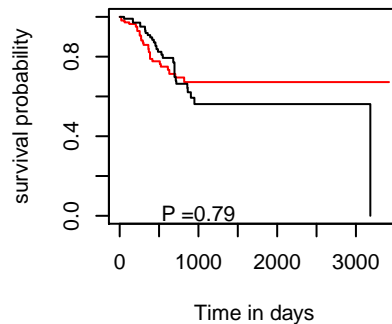**OS hsa-mir-491**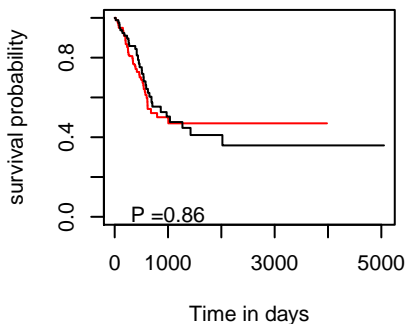**PFI hsa-mir-491**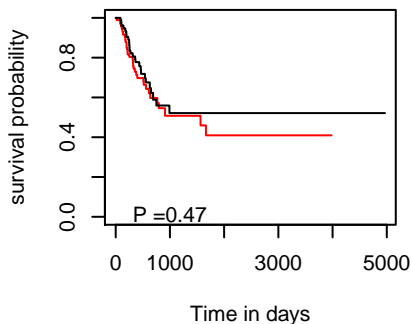**DFI hsa-mir-491**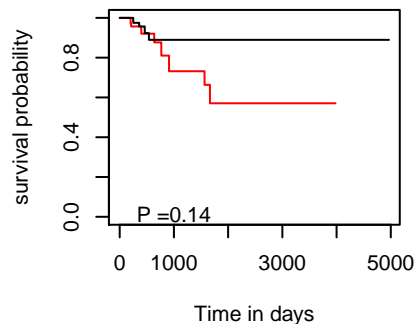**DSS hsa-mir-491**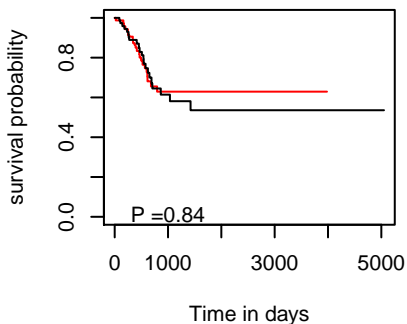**OS hsa-mir-365b**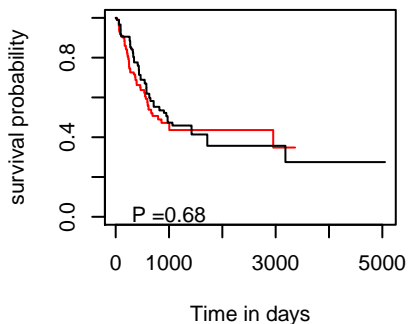**PFI hsa-mir-365b**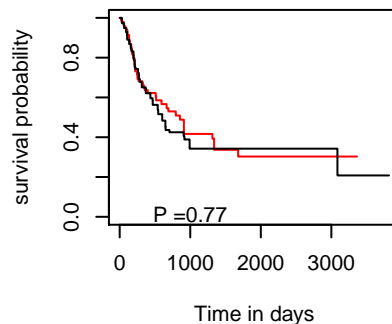

**DFI hsa-mir-365b**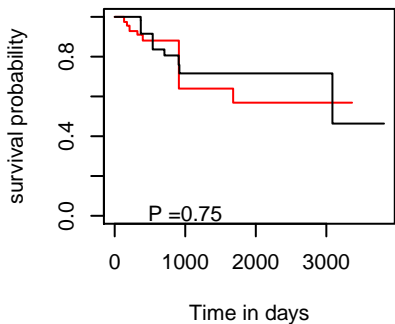**DSS hsa-mir-365b**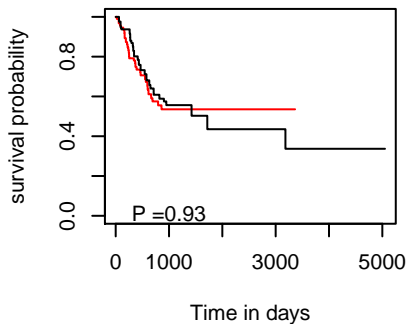**OS hsa-mir-7705**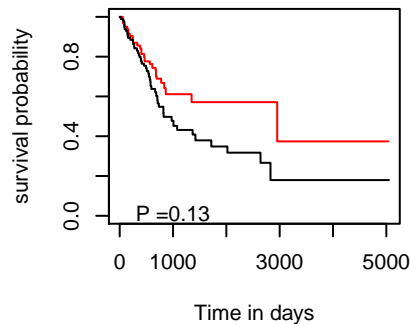**PFI hsa-mir-7705**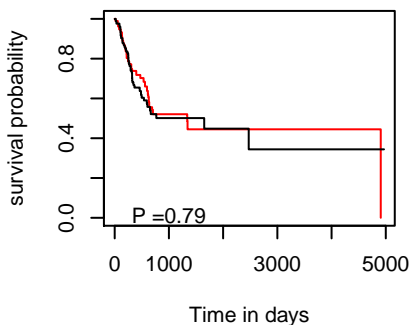**DFI hsa-mir-7705**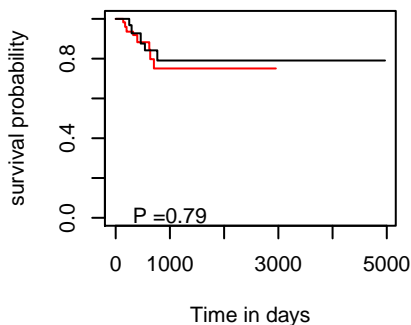**DSS hsa-mir-7705**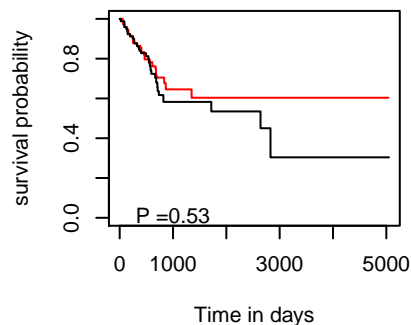**OS hsa-mir-4755**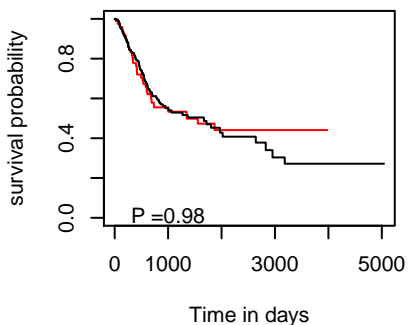**PFI hsa-mir-4755**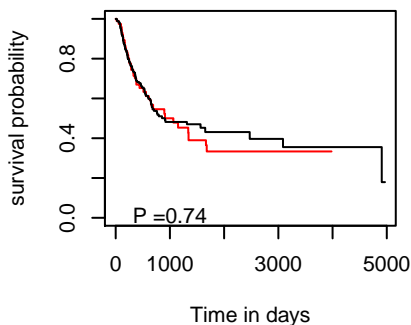**DFI hsa-mir-4755**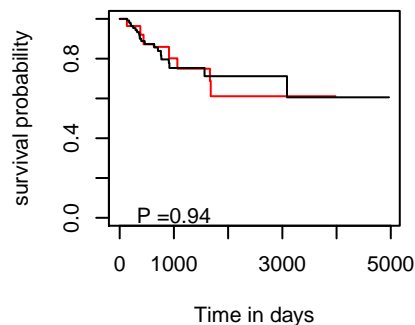

**DSS hsa-mir-4755**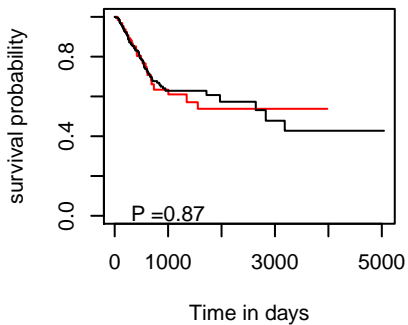**OS hsa-mir-5680**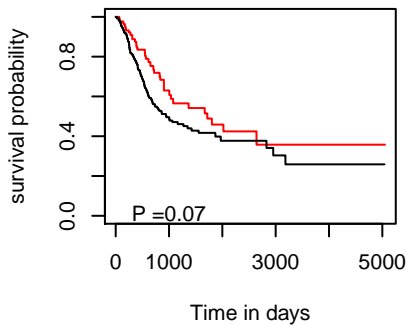**PFI hsa-mir-5680**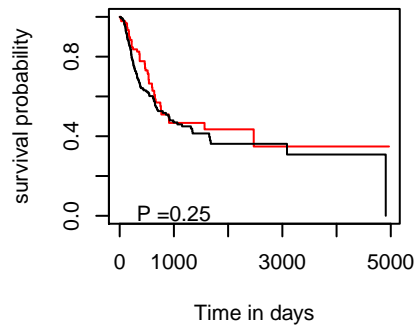**DFI hsa-mir-5680**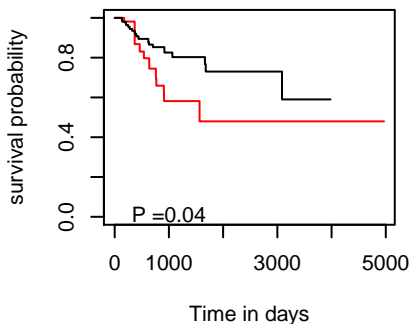**DSS hsa-mir-5680**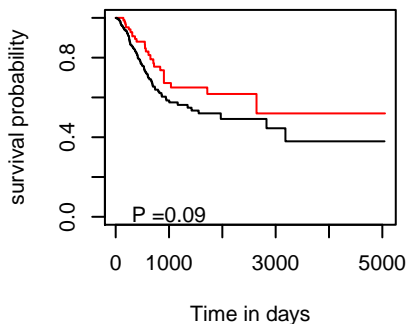**OS hsa-mir-5003**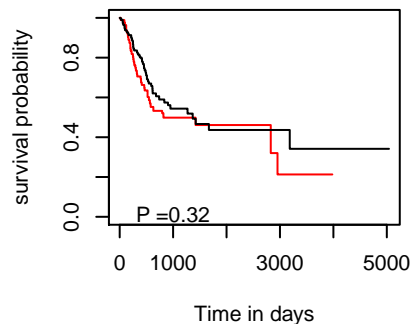**PFI hsa-mir-5003**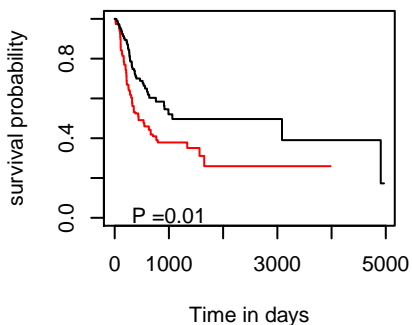**DFI hsa-mir-5003**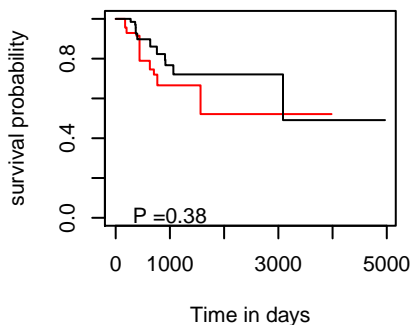**DSS hsa-mir-5003**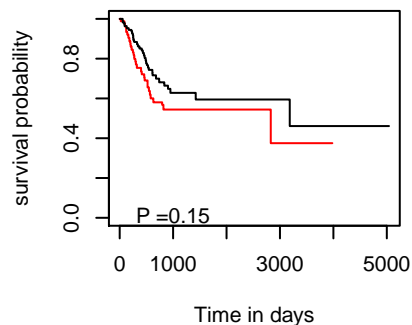

**OS hsa-mir-92b**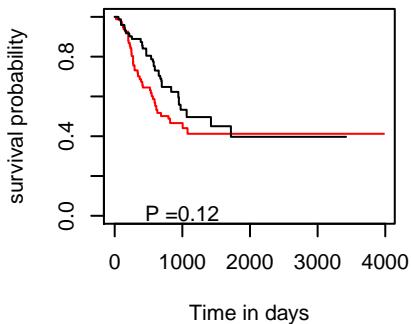**PFI hsa-mir-92b**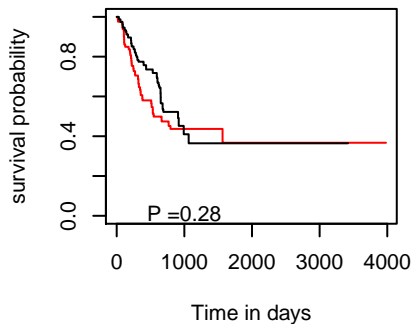**DFI hsa-mir-92b**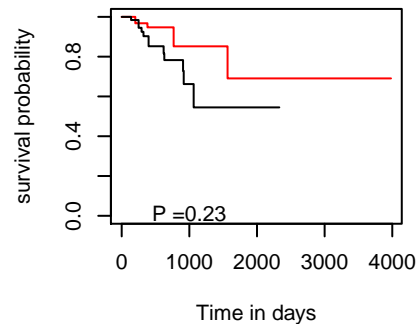**DSS hsa-mir-92b**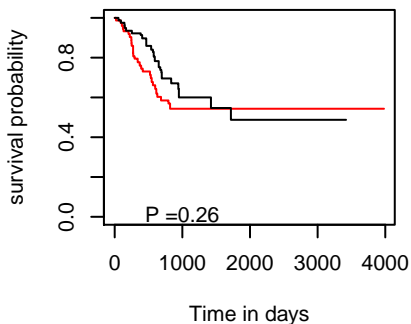**OS hsa-let-7b**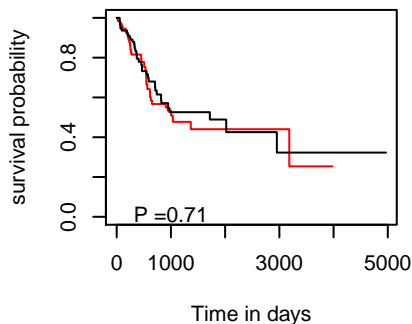**PFI hsa-let-7b**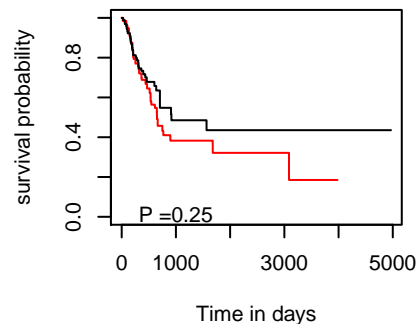**DFI hsa-let-7b**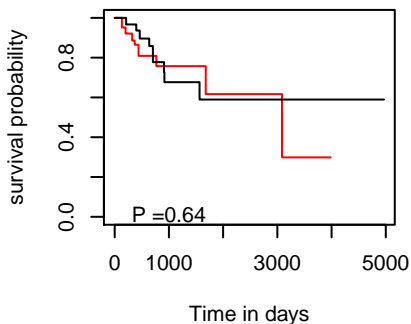**DSS hsa-let-7b**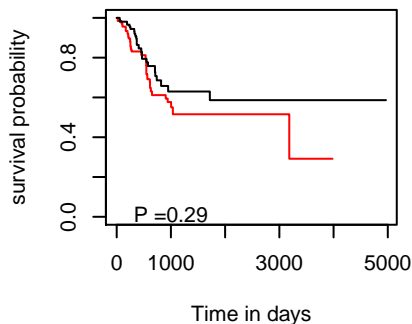**OS hsa-mir-3920**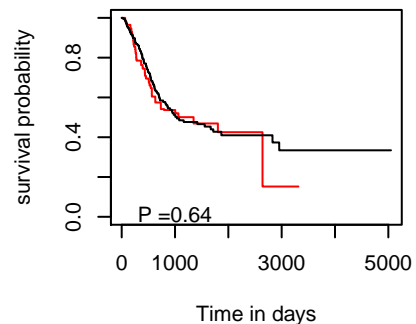

**PFI hsa-mir-3920**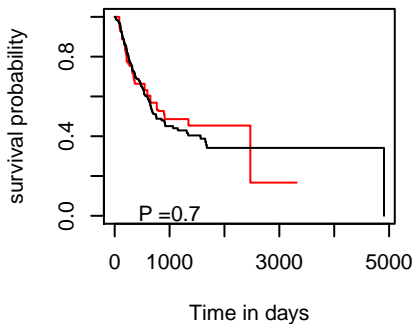**DFI hsa-mir-3920**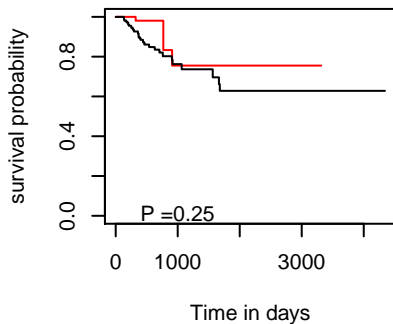**DSS hsa-mir-3920**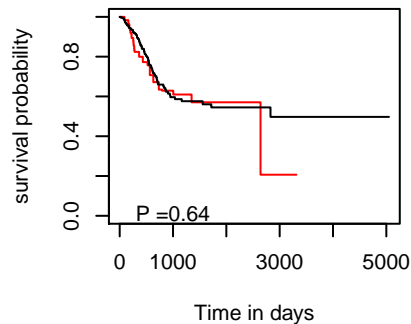**OS hsa-mir-30c-1**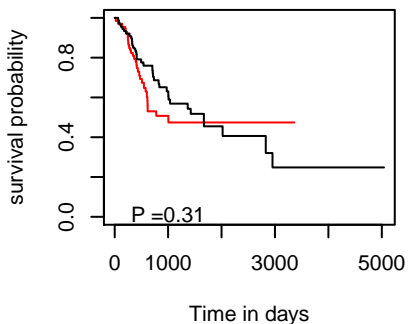**PFI hsa-mir-30c-1**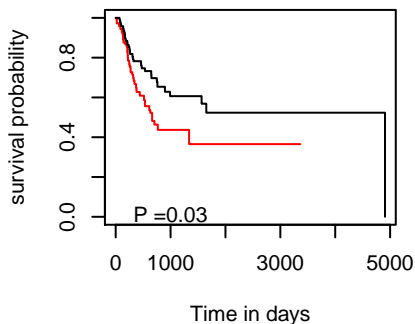**DFI hsa-mir-30c-1**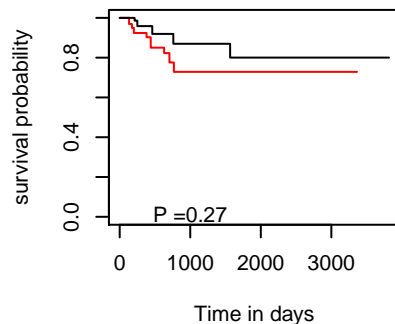**DSS hsa-mir-30c-1**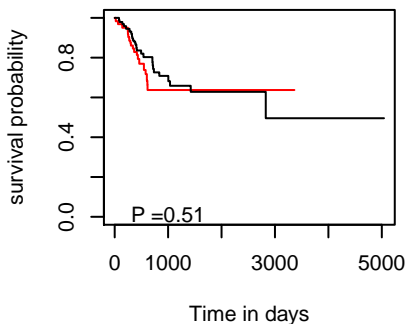**OS hsa-mir-4443**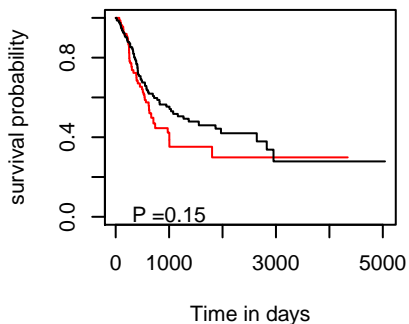**PFI hsa-mir-4443**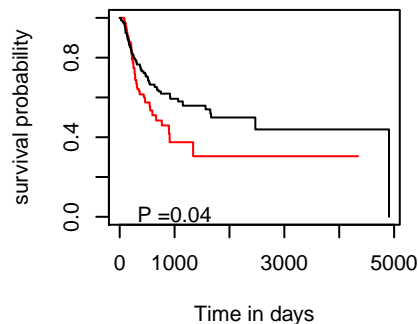

**DFI hsa-mir-4443**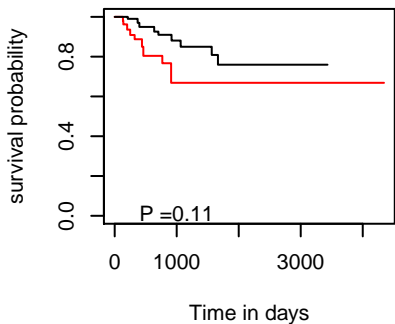**DSS hsa-mir-4443**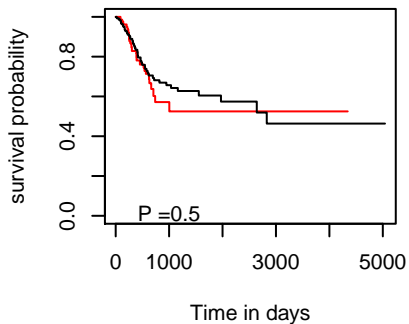**OS hsa-mir-4766**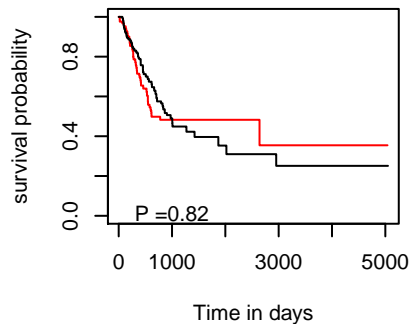**PFI hsa-mir-4766**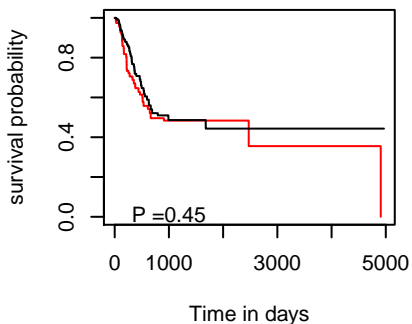**DFI hsa-mir-4766**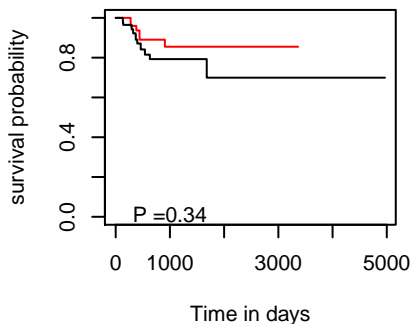**DSS hsa-mir-4766**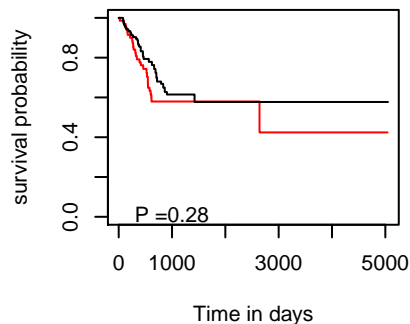**OS hsa-mir-4691**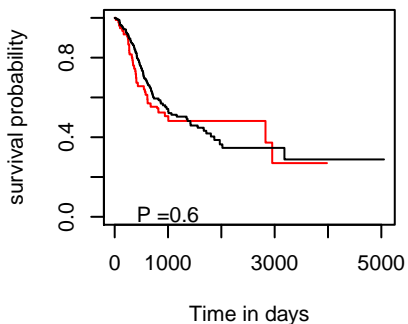**PFI hsa-mir-4691**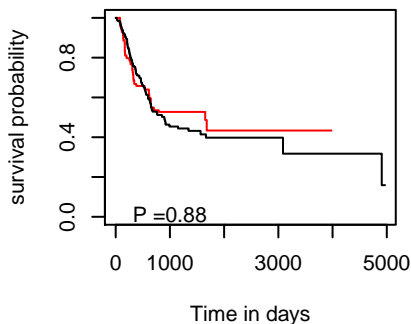**DFI hsa-mir-4691**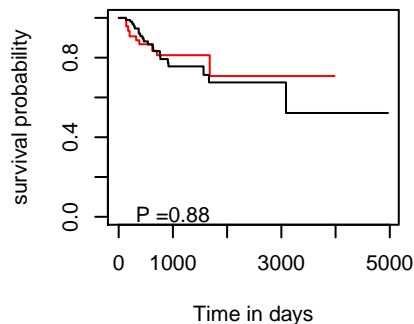

**DSS hsa-mir-4691**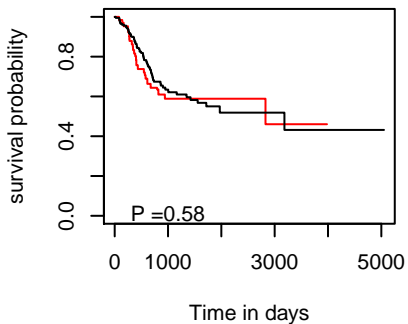**OS hsa-mir-548d-1**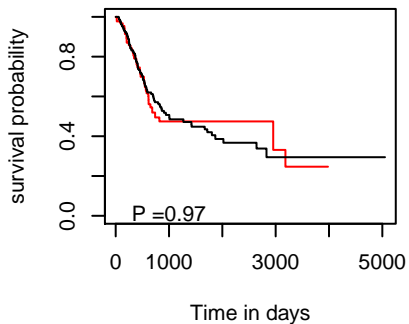**PFI hsa-mir-548d-1**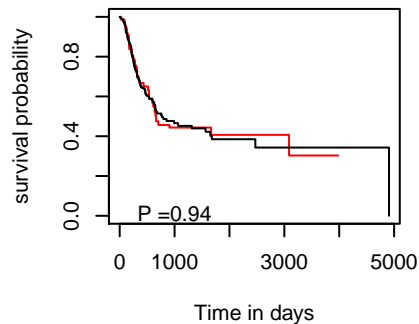**DFI hsa-mir-548d-1**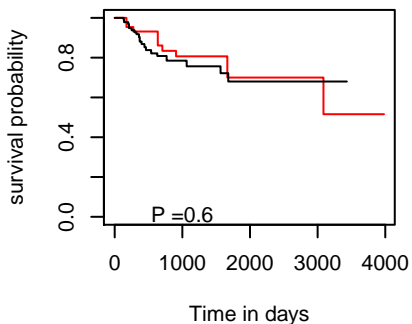**DSS hsa-mir-548d-1**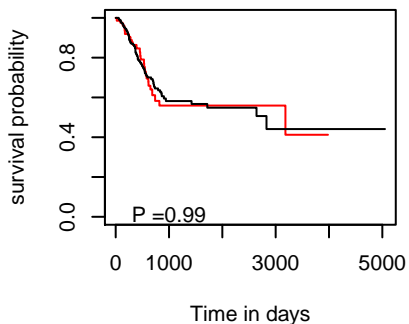**OS hsa-mir-34b**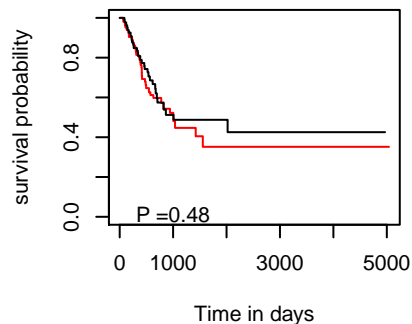**PFI hsa-mir-34b**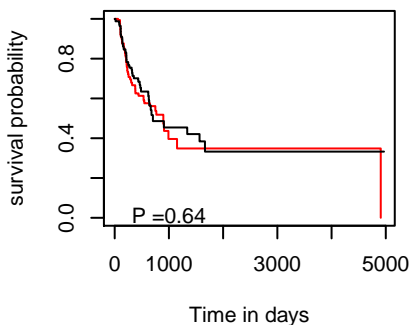**DFI hsa-mir-34b**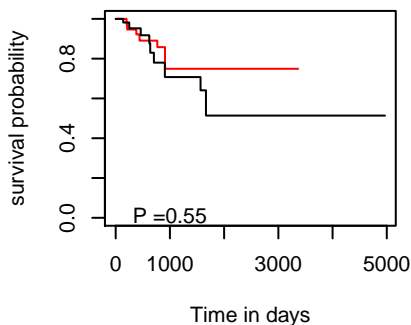**DSS hsa-mir-34b**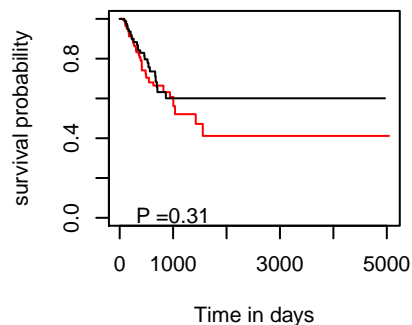

**OS hsa-mir-675**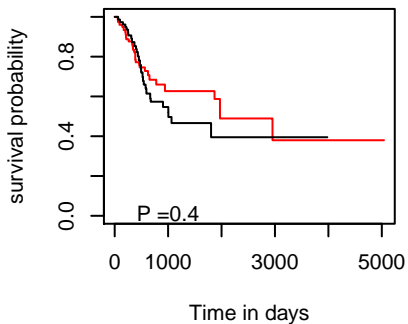**PFI hsa-mir-675**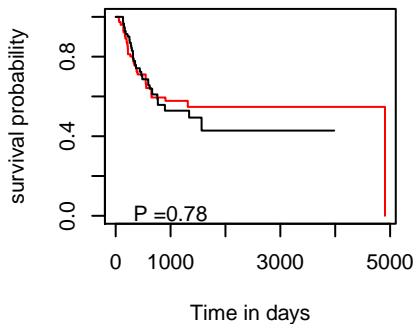**DFI hsa-mir-675**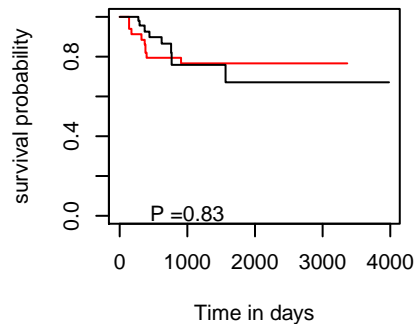**DSS hsa-mir-675**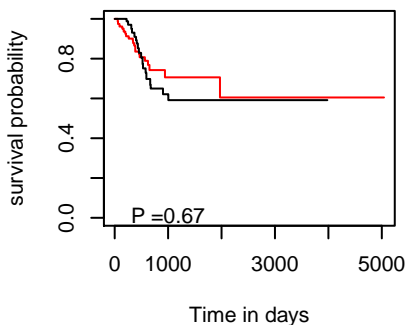**OS hsa-mir-449b**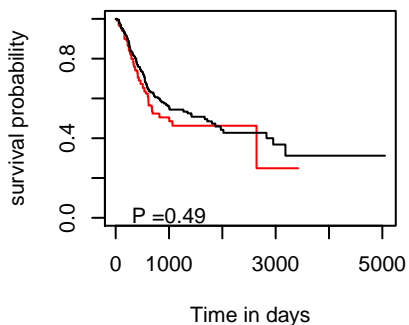**PFI hsa-mir-449b**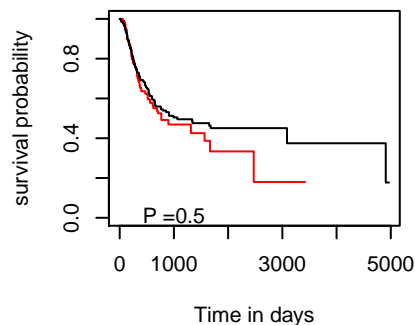**DFI hsa-mir-449b**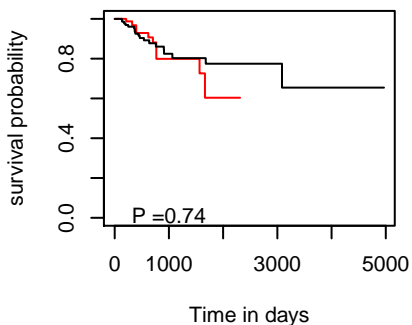**DSS hsa-mir-449b**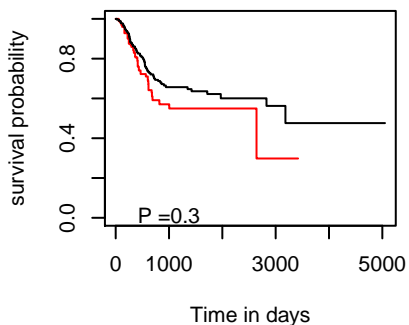**OS hsa-mir-135a-1**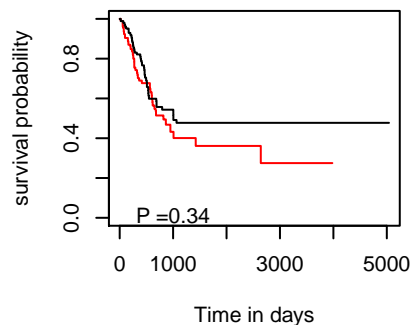

**PFI hsa-mir-135a-1**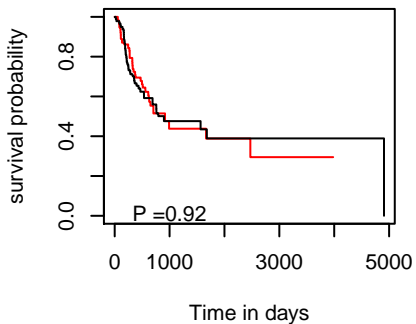**DFI hsa-mir-135a-1**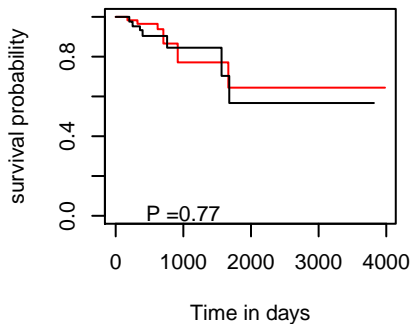**DSS hsa-mir-135a-1**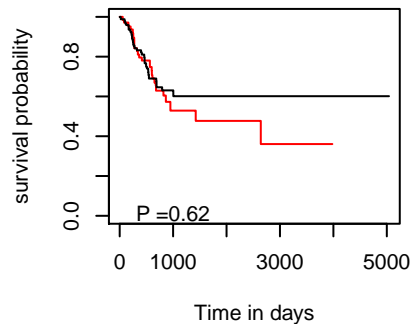**OS hsa-mir-193a**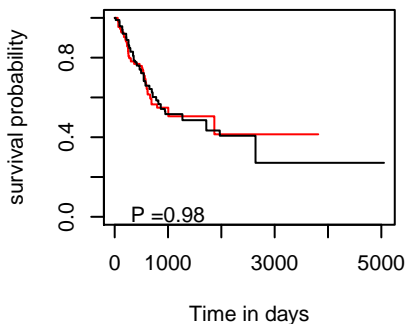**PFI hsa-mir-193a**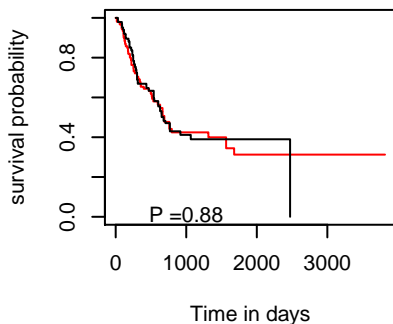**DFI hsa-mir-193a**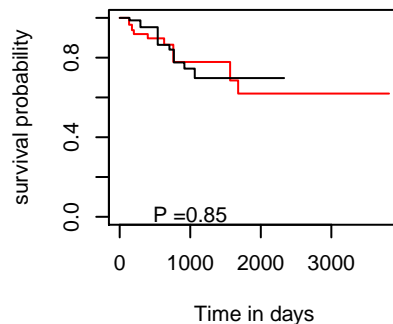**DSS hsa-mir-193a**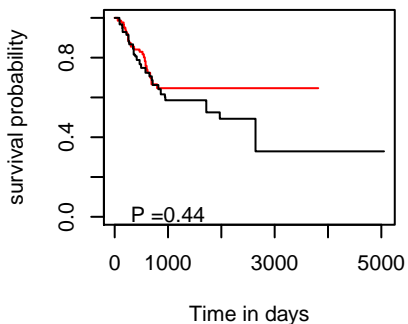**OS hsa-mir-4523**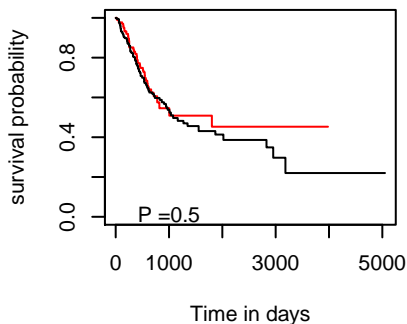**PFI hsa-mir-4523**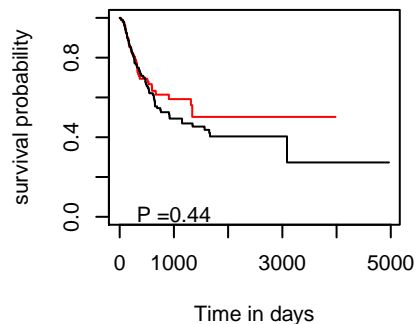

**DFI hsa-mir-4523**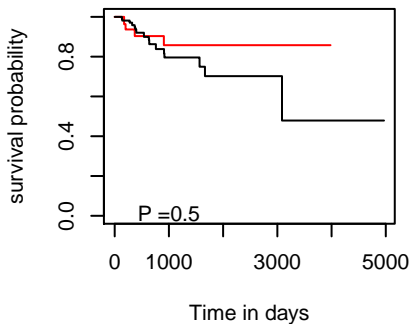**DSS hsa-mir-4523**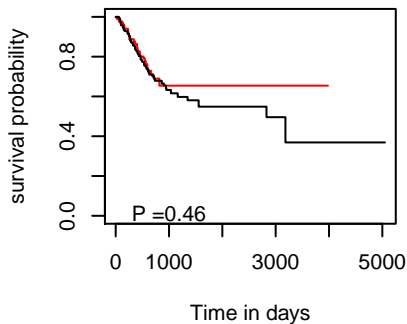**OS hsa-mir-5698**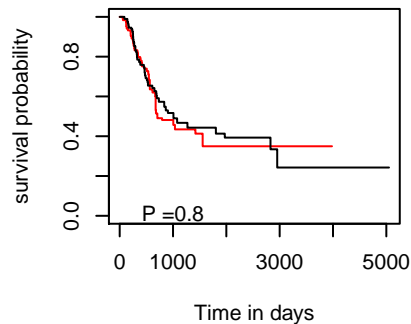**PFI hsa-mir-5698**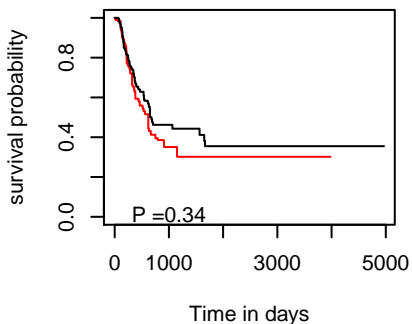**DFI hsa-mir-5698**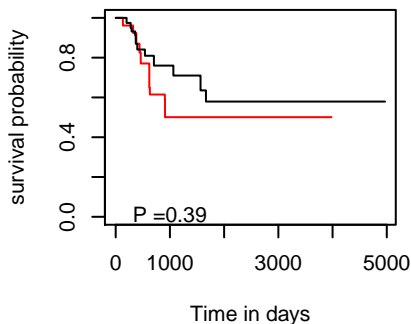**DSS hsa-mir-5698**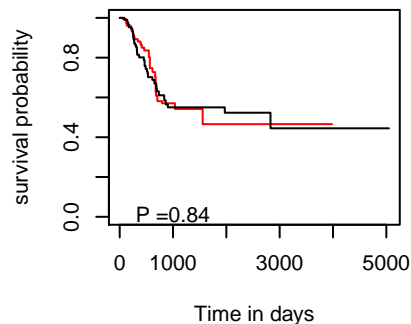**OS hsa-mir-3136**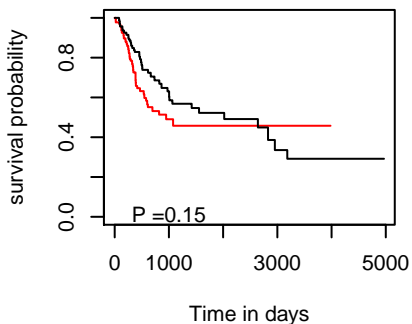**PFI hsa-mir-3136**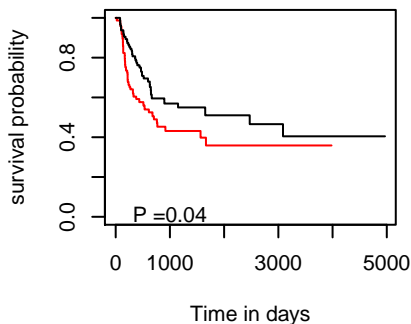**DFI hsa-mir-3136**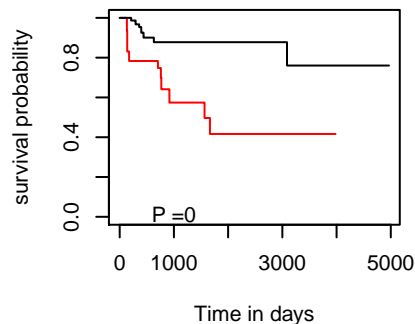

**DSS hsa-mir-3136**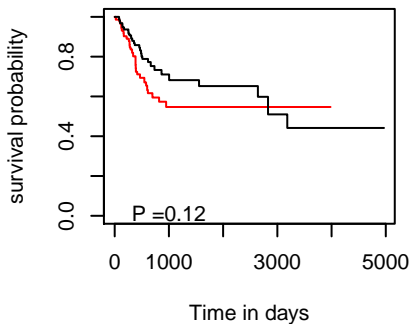**OS hsa-mir-1305**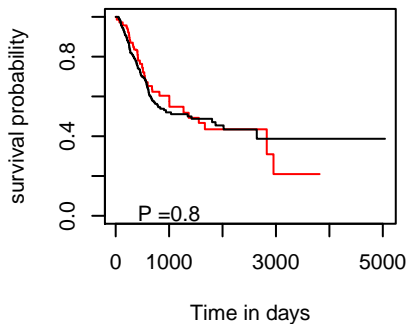**PFI hsa-mir-1305**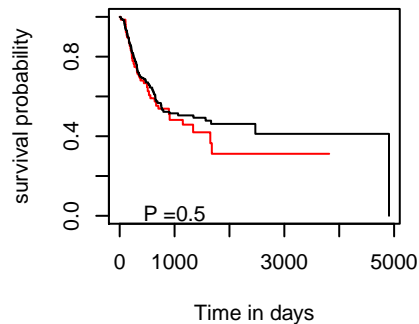**DFI hsa-mir-1305**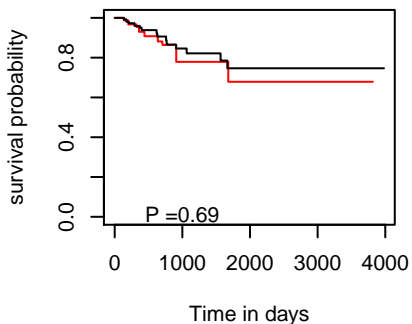**DSS hsa-mir-1305**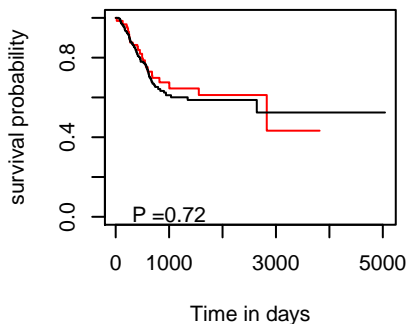**OS hsa-mir-125b-1**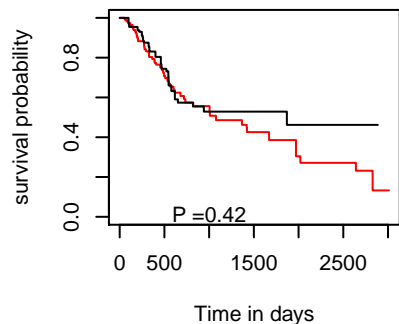**PFI hsa-mir-125b-1**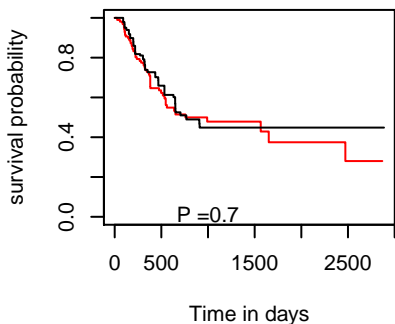**DFI hsa-mir-125b-1**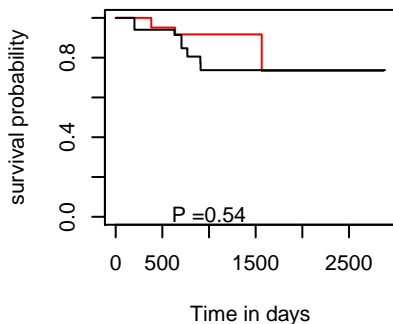**DSS hsa-mir-125b-1**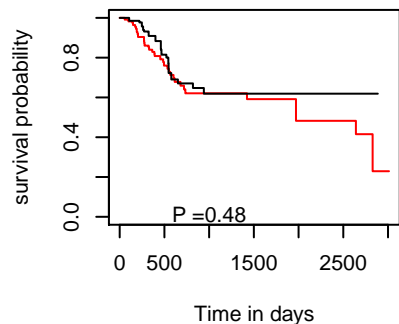

**OS hsa-mir-4444-2**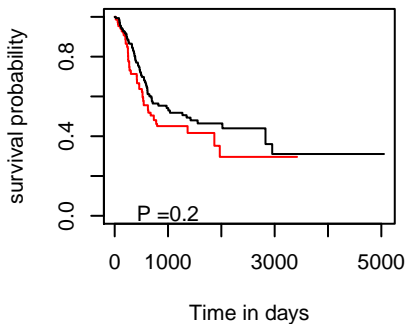**PFI hsa-mir-4444-2**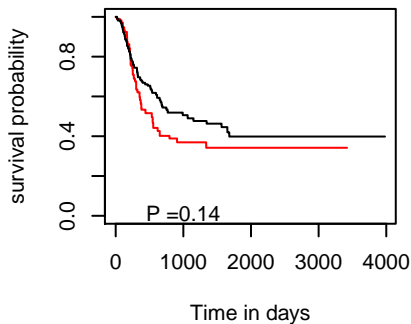**DFI hsa-mir-4444-2**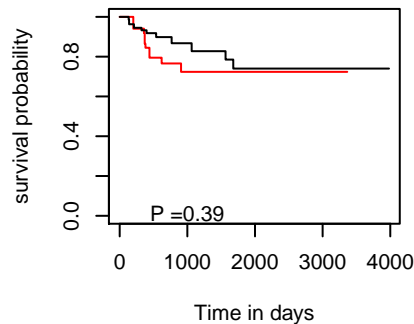**DSS hsa-mir-4444-2**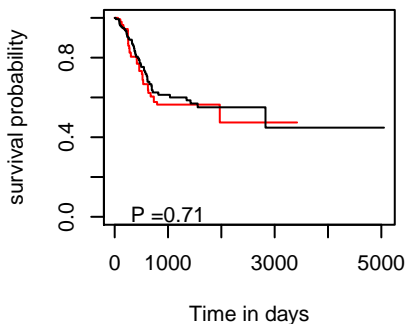**OS hsa-mir-3942**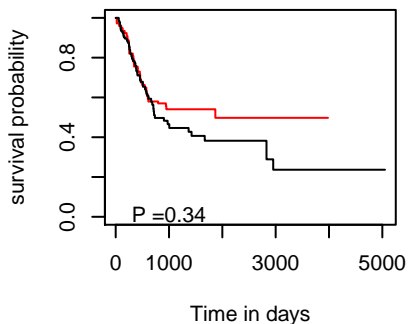**PFI hsa-mir-3942**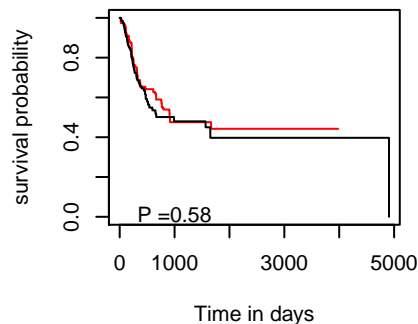**DFI hsa-mir-3942**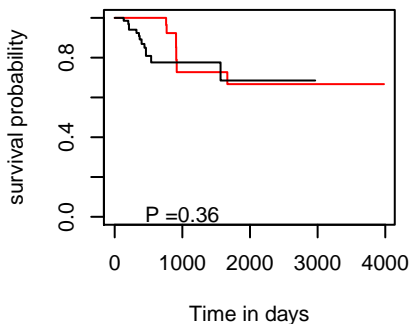**DSS hsa-mir-3942**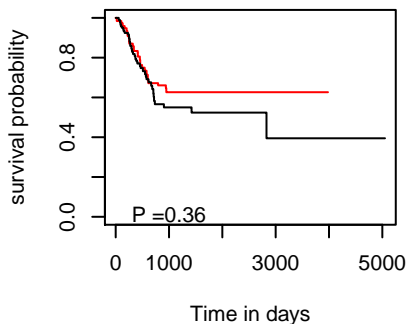**OS hsa-mir-581**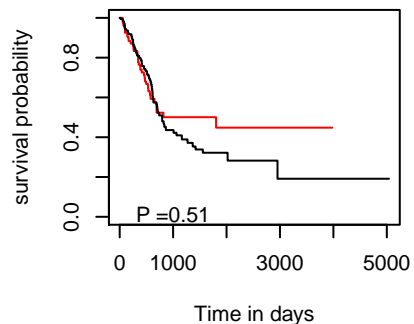

**PFI hsa-mir-581**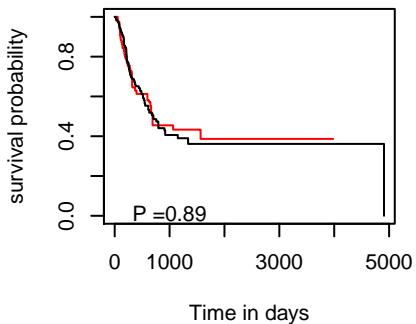**DFI hsa-mir-581**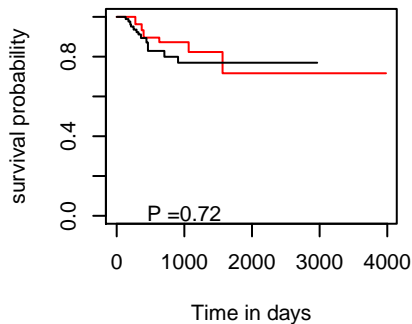**DSS hsa-mir-581**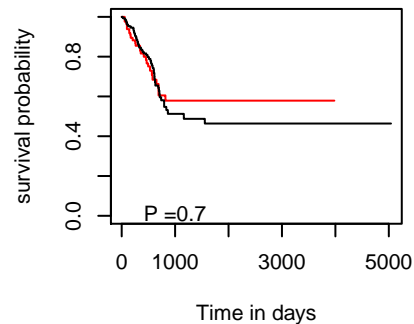**OS hsa-mir-632**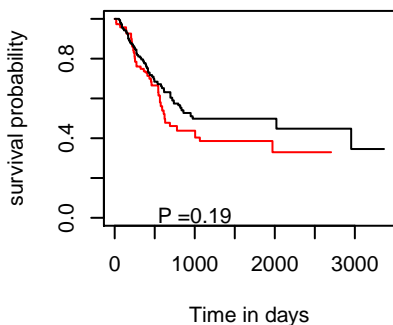**PFI hsa-mir-632**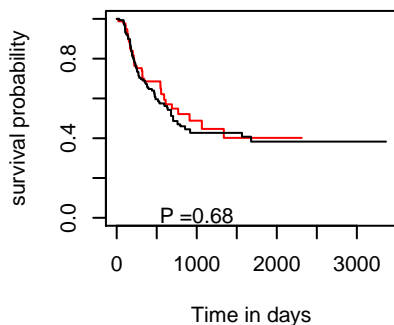**DFI hsa-mir-632**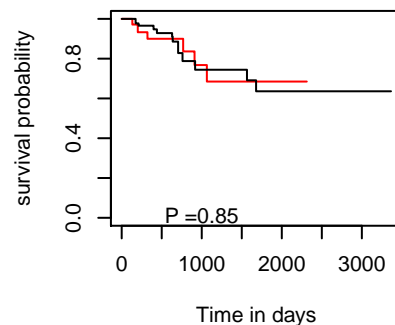**DSS hsa-mir-632**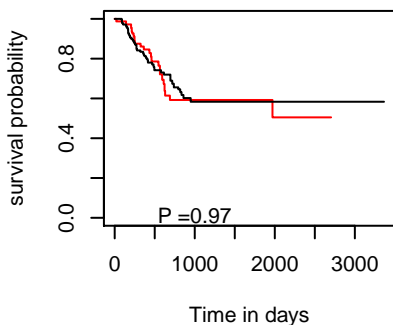**OS hsa-mir-4522**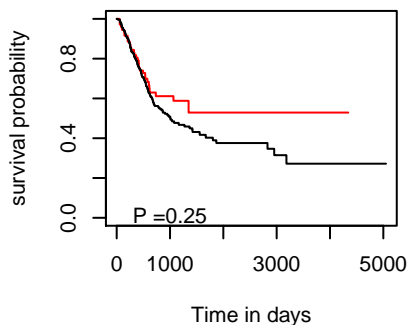**PFI hsa-mir-4522**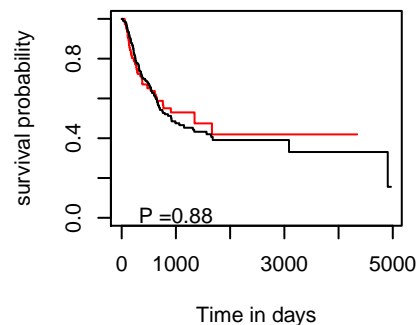

**DFI hsa-mir-4522**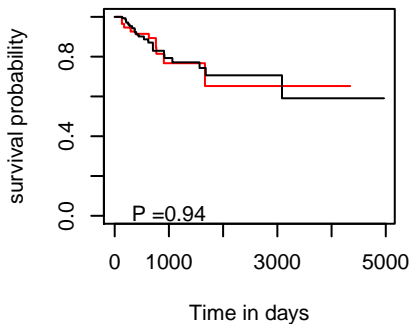**DSS hsa-mir-4522**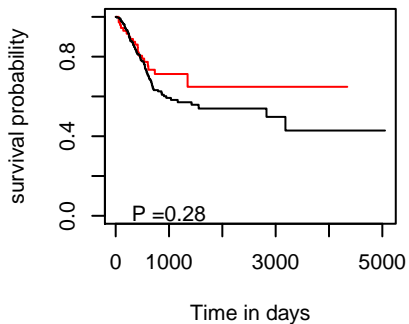**OS hsa-mir-3193**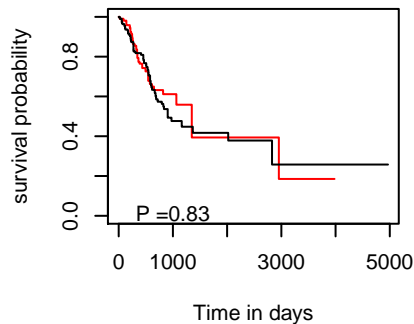**PFI hsa-mir-3193**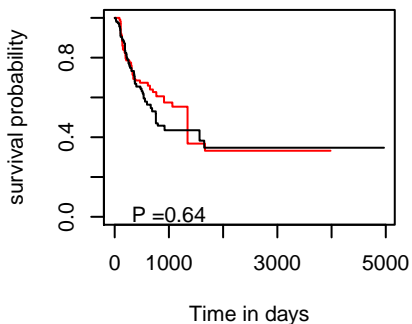**DFI hsa-mir-3193**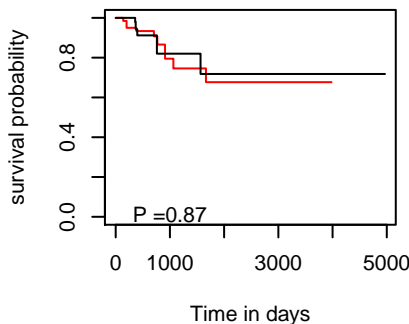**DSS hsa-mir-3193**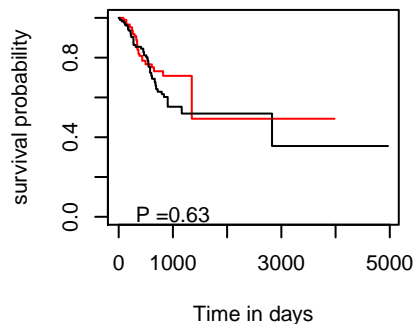**OS hsa-mir-744**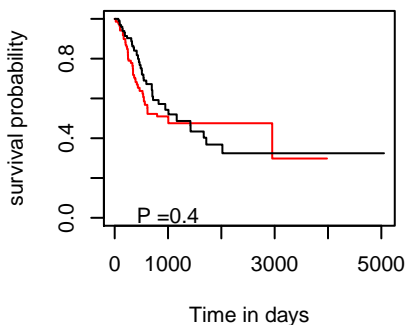**PFI hsa-mir-744**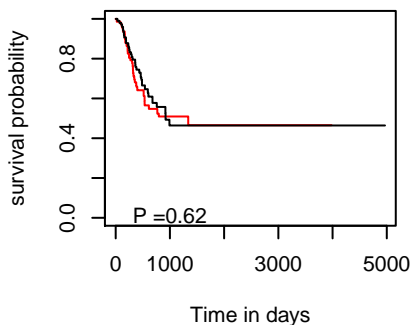**DFI hsa-mir-744**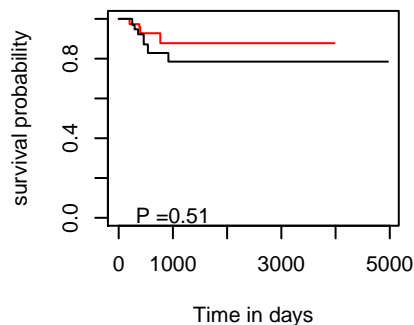

**DSS hsa-mir-744**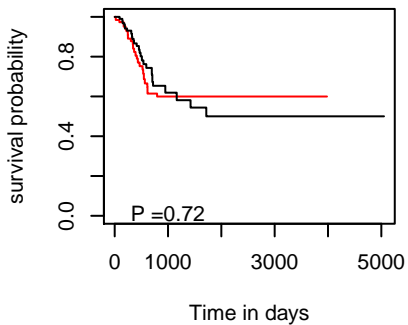**OS hsa-mir-2115**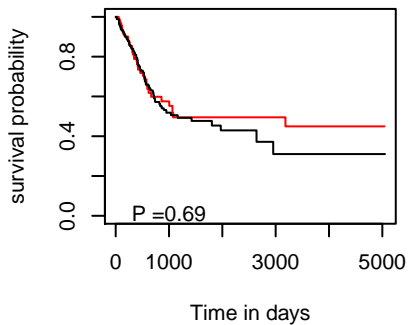**PFI hsa-mir-2115**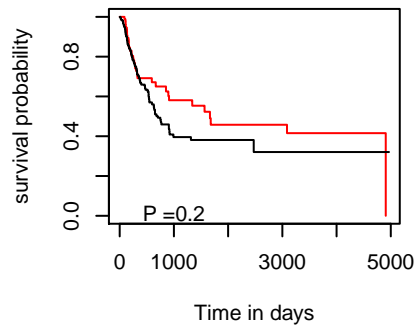**DFI hsa-mir-2115**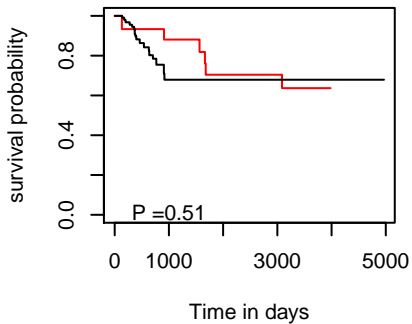**DSS hsa-mir-2115**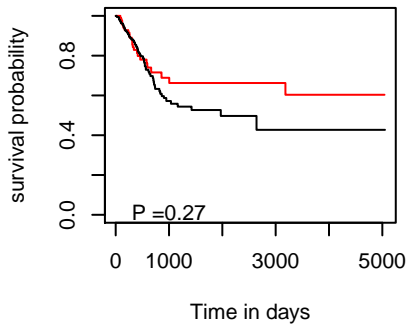**OS hsa-mir-4645**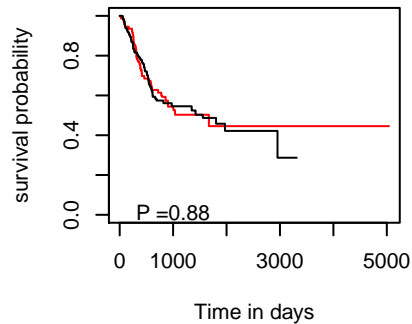**PFI hsa-mir-4645**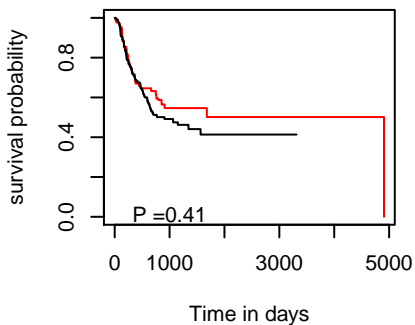**DFI hsa-mir-4645**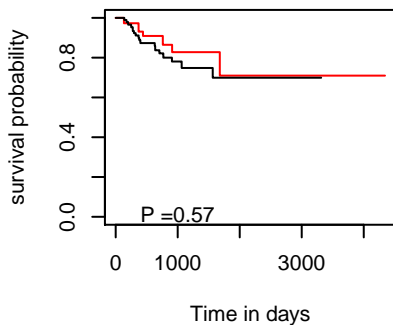**DSS hsa-mir-4645**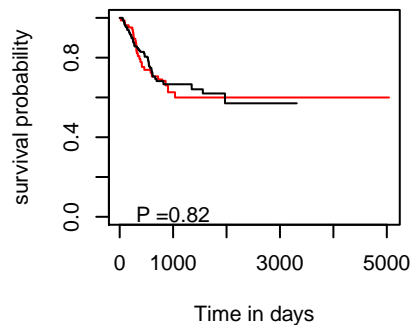

**OS hsa-mir-597**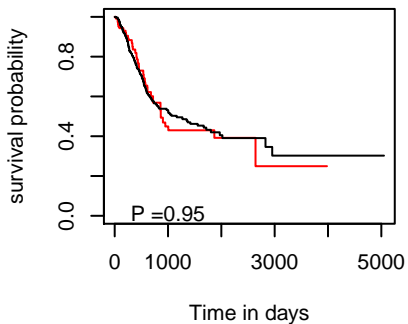**PFI hsa-mir-597**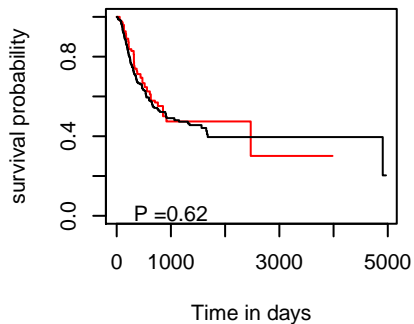**DFI hsa-mir-597**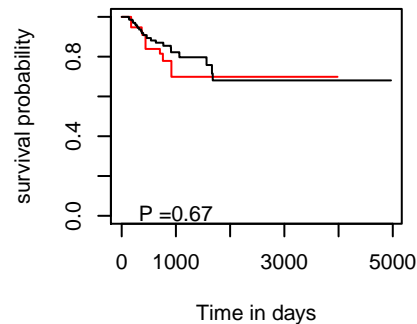**DSS hsa-mir-597**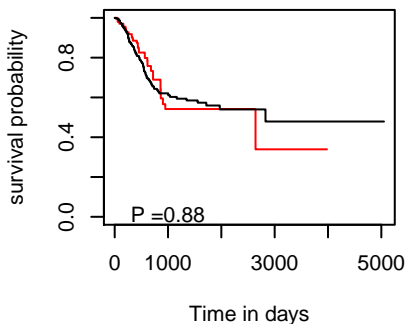**OS hsa-mir-1269b**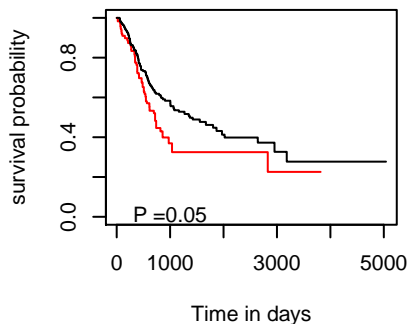**PFI hsa-mir-1269b**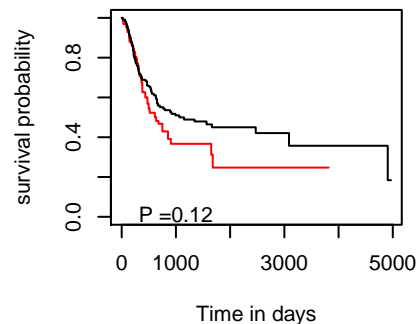**DFI hsa-mir-1269b**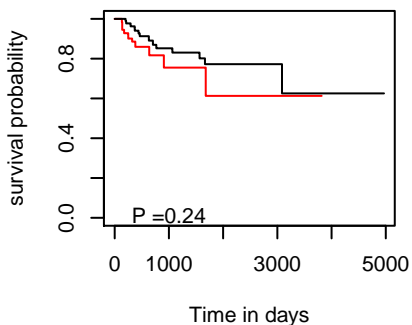**DSS hsa-mir-1269b**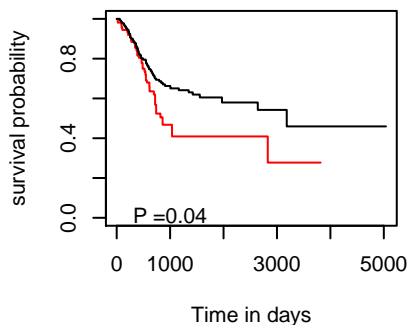**OS hsa-mir-3940**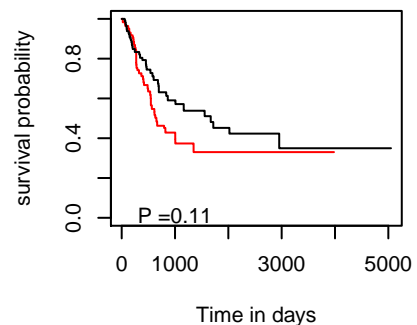

**PFI hsa-mir-3940**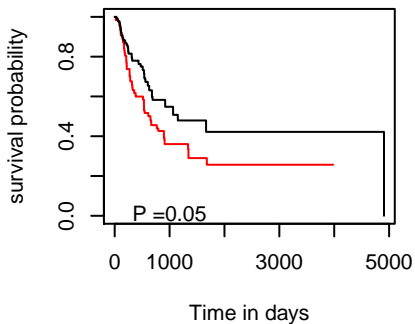**DFI hsa-mir-3940**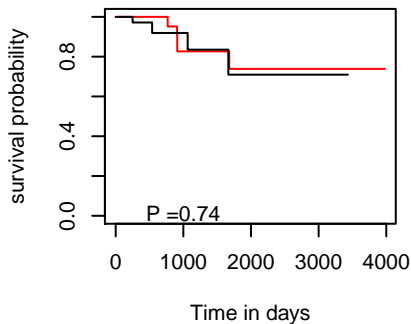**DSS hsa-mir-3940**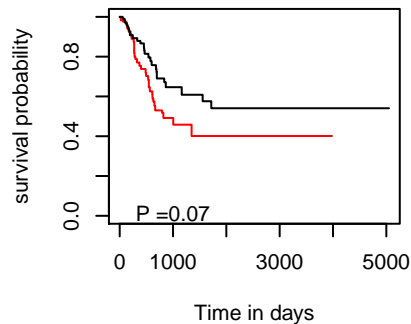**OS hsa-mir-5699**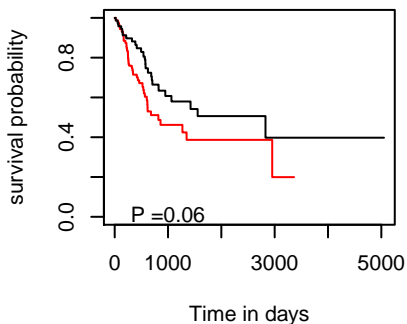**PFI hsa-mir-5699**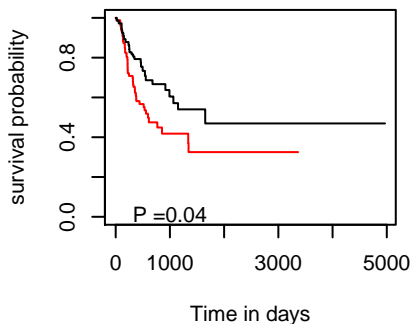**DFI hsa-mir-5699**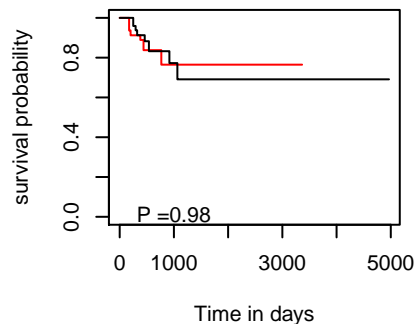**DSS hsa-mir-5699**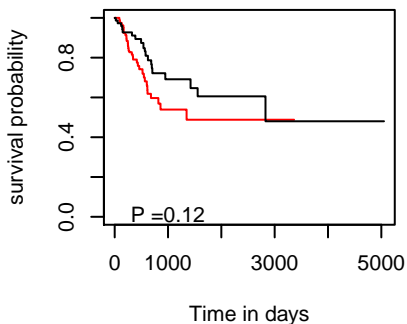**OS hsa-mir-548d-2**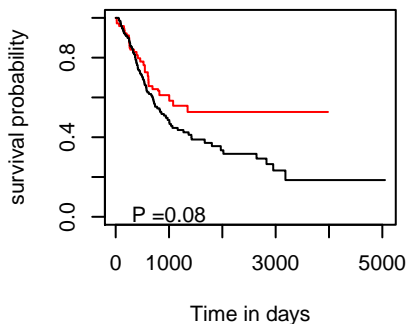**PFI hsa-mir-548d-2**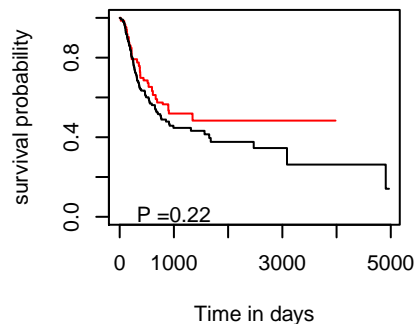

**DFI hsa-mir-548d-2**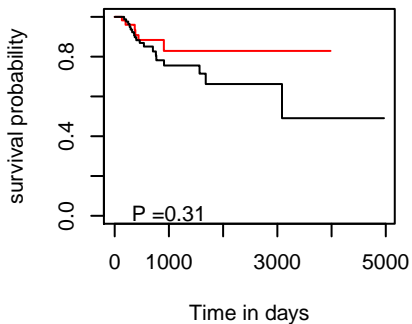**DSS hsa-mir-548d-2**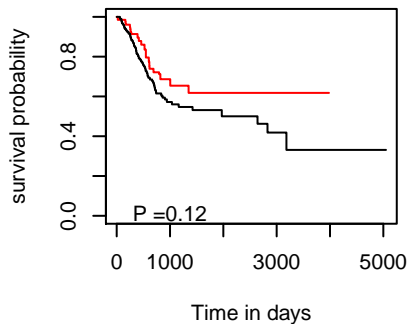**OS hsa-mir-3187**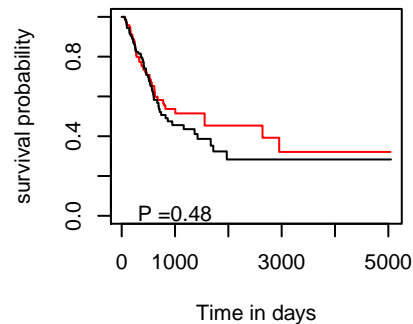**PFI hsa-mir-3187**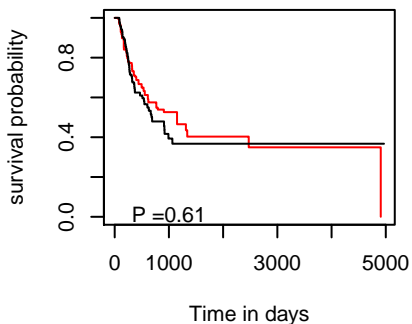**DFI hsa-mir-3187**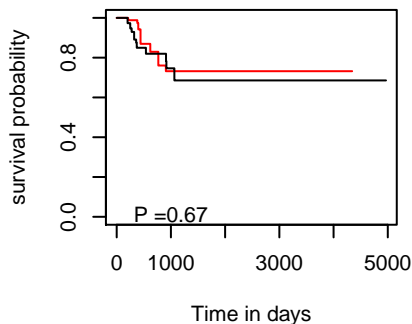**DSS hsa-mir-3187**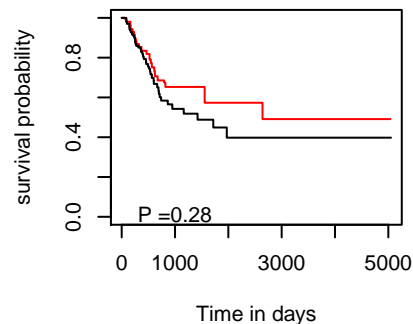**OS hsa-mir-1284**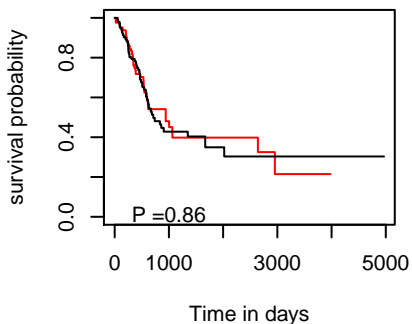**PFI hsa-mir-1284**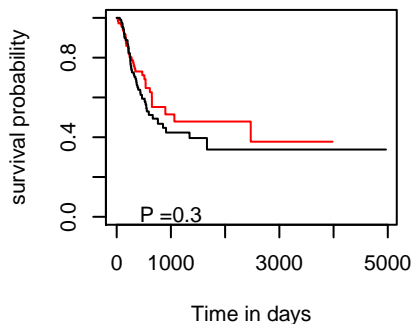**DFI hsa-mir-1284**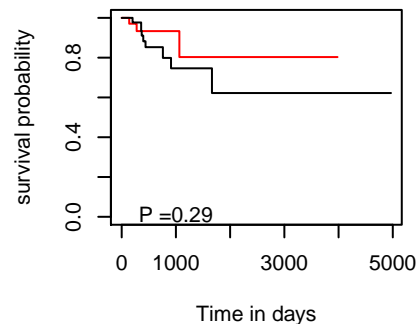

**DSS hsa-mir-1284**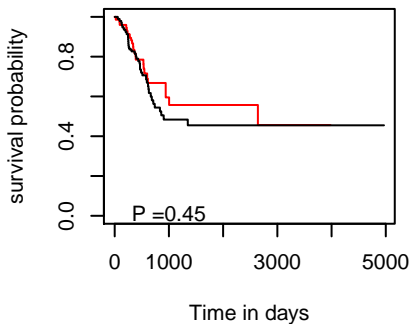**OS hsa-mir-3667**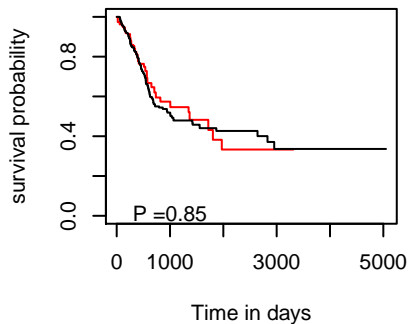**PFI hsa-mir-3667**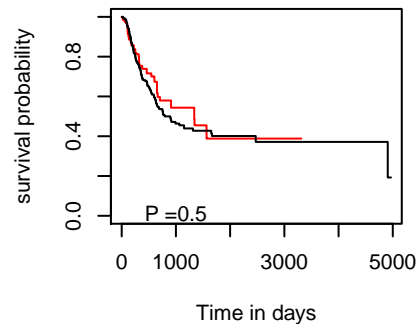**DFI hsa-mir-3667**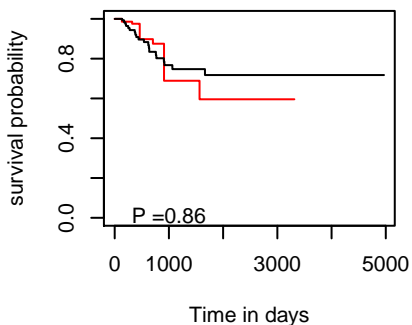**DSS hsa-mir-3667**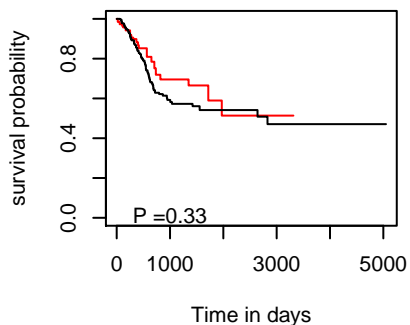**OS hsa-mir-4762**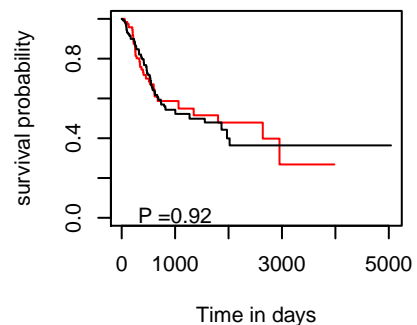**PFI hsa-mir-4762**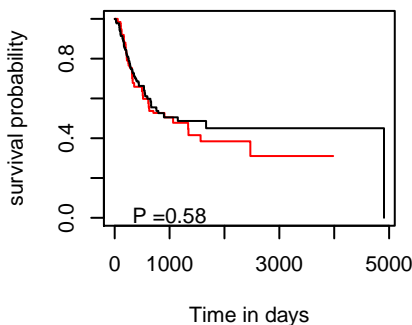**DFI hsa-mir-4762**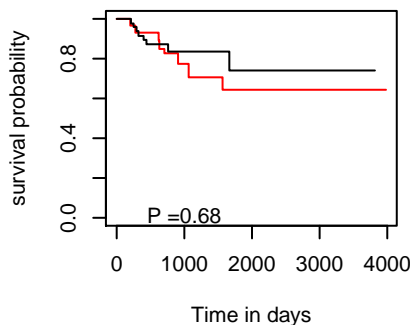**DSS hsa-mir-4762**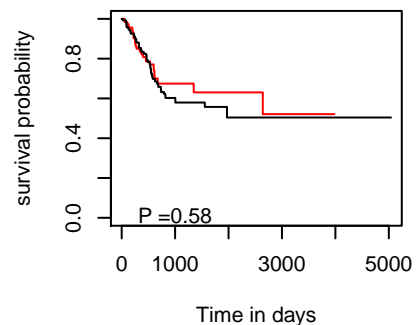

**OS hsa-mir-7113**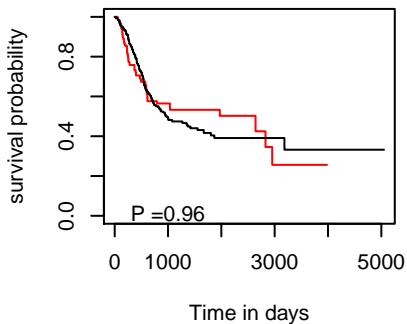**PFI hsa-mir-7113**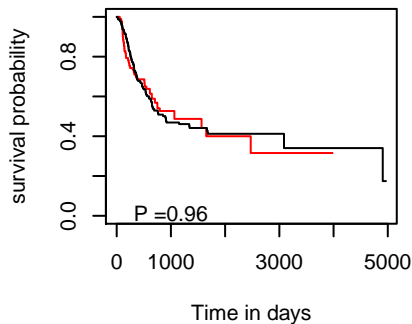**DFI hsa-mir-7113**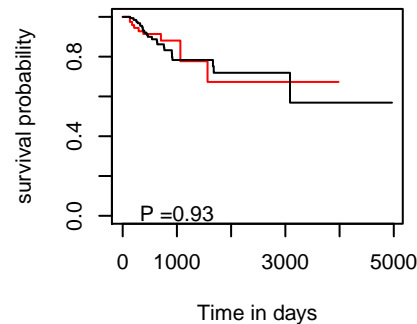**DSS hsa-mir-7113**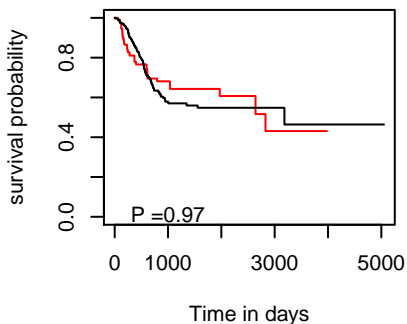**OS hsa-mir-103a-1**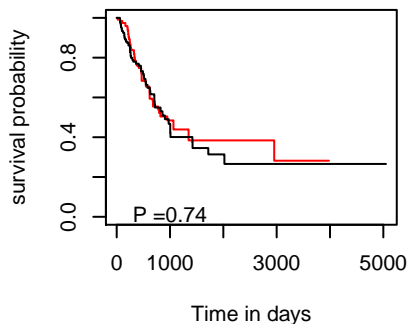**PFI hsa-mir-103a-1**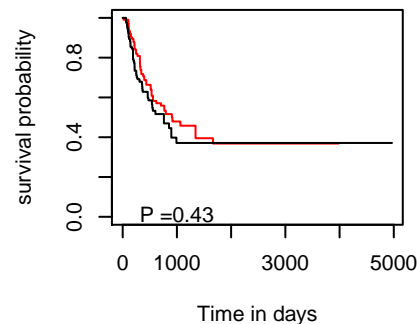**DFI hsa-mir-103a-1**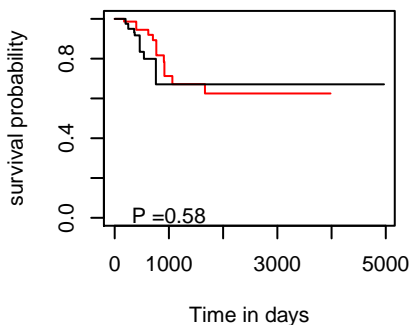**DSS hsa-mir-103a-1**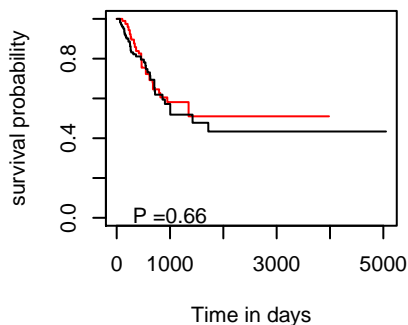**OS hsa-mir-378d-2**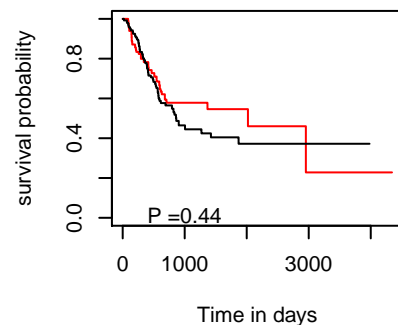

**PFI hsa-mir-378d-2**

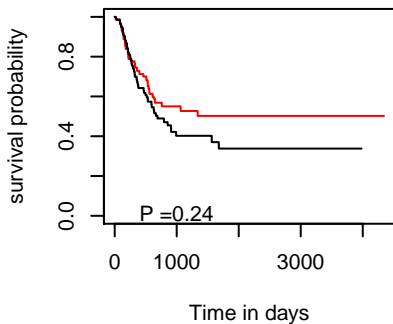

**DFI hsa-mir-378d-2**

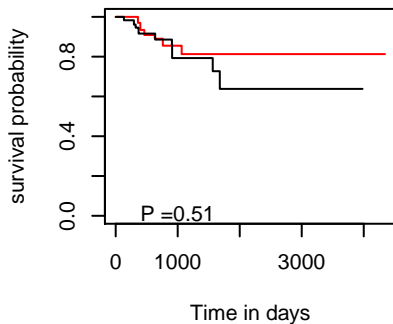

**DSS hsa-mir-378d-2**

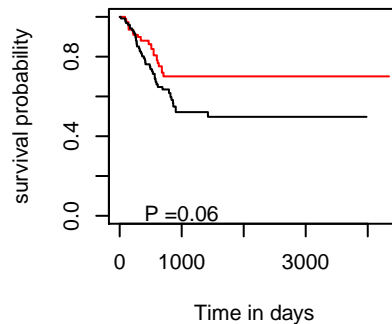

**OS hsa-mir-1249**

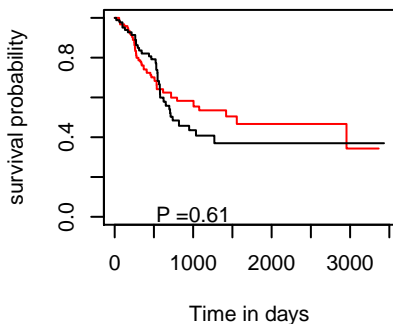

**PFI hsa-mir-1249**

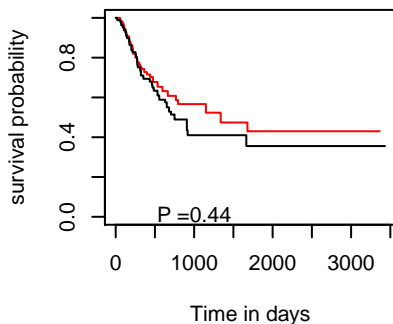

**DFI hsa-mir-1249**

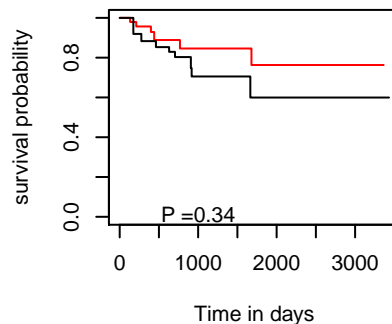

**DSS hsa-mir-1249**

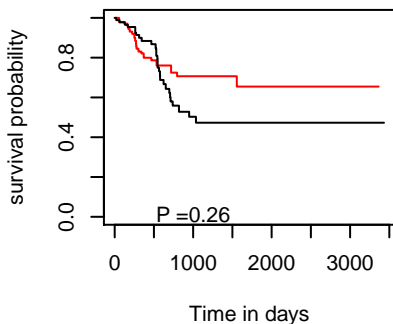

**OS hsa-mir-4728**

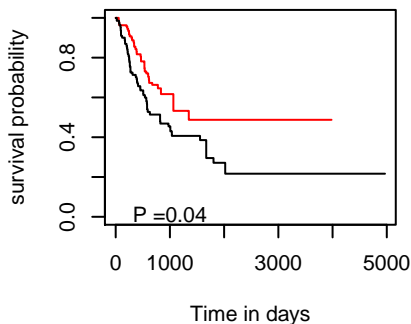

**PFI hsa-mir-4728**

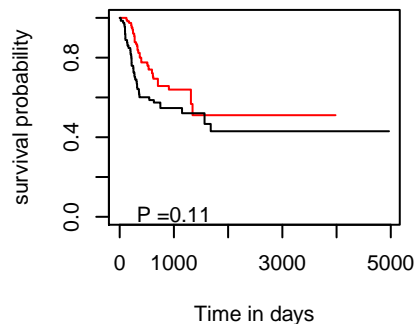

**DFI hsa-mir-4728**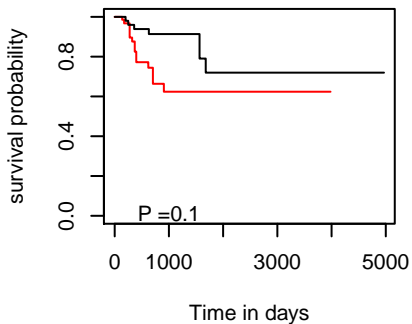**DSS hsa-mir-4728**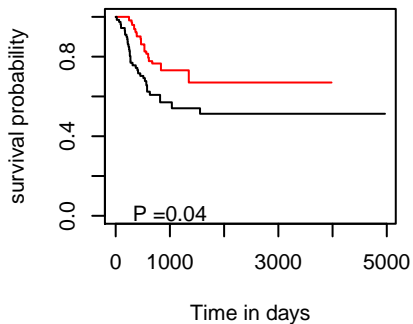**OS hsa-mir-210**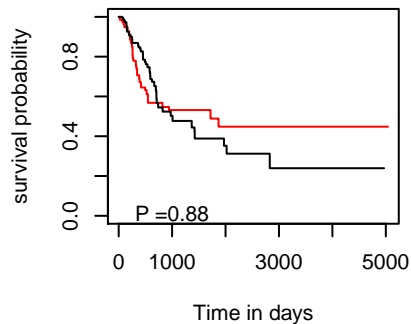**PFI hsa-mir-210**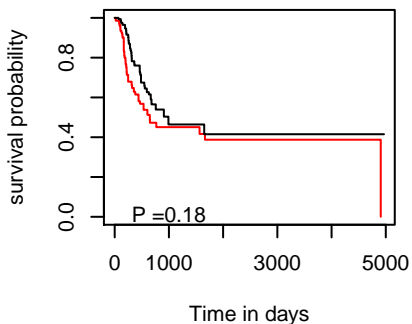**DFI hsa-mir-210**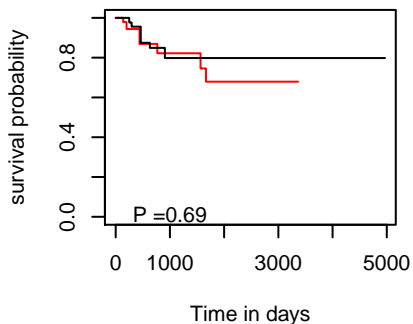**DSS hsa-mir-210**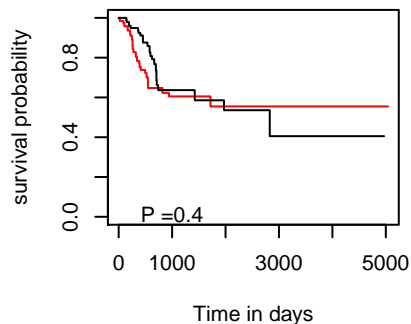**OS hsa-mir-218-2**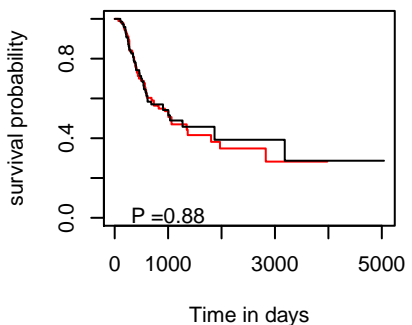**PFI hsa-mir-218-2**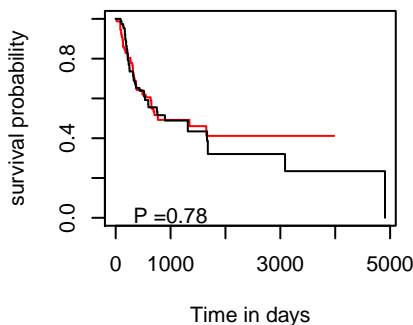**DFI hsa-mir-218-2**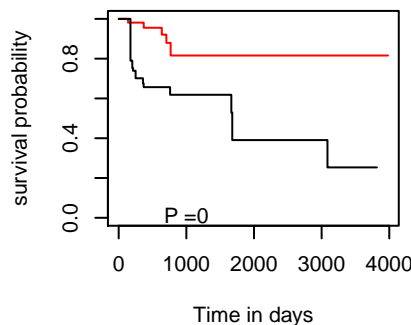

DSS hsa-mir-218-2

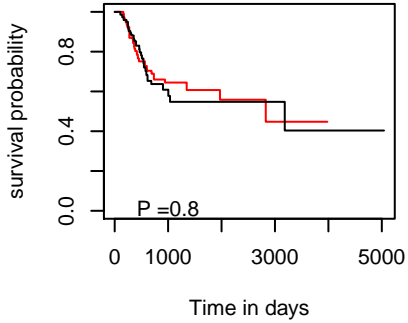

OS hsa-mir-6511b-1

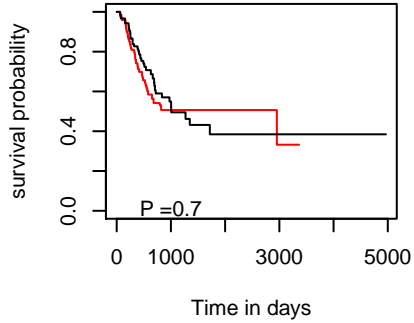

PFI hsa-mir-6511b-1

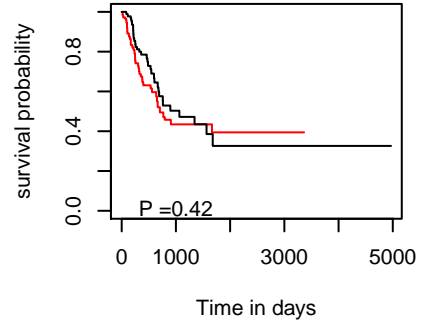

DFI hsa-mir-6511b-1

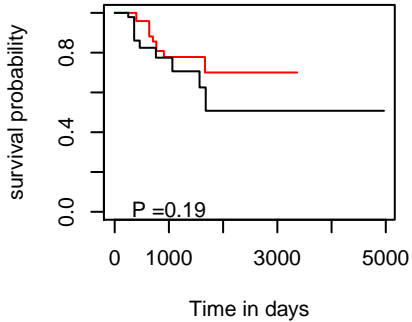

DSS hsa-mir-6511b-1

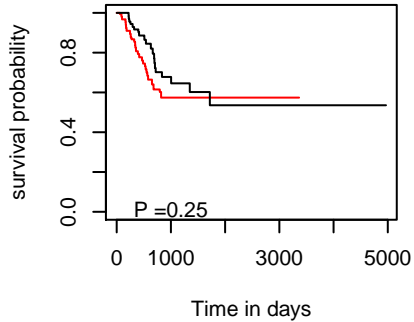

Supplement: MOESM11 [file 41598_2022_7628_MOESM11_ESM.pdf]
