# Supplementary material for: New Thinking on Read-Aloud.
Source: Springer Nature journal article supplement (doi:10.1038/s41598-022-07628-z), 2001-01-01

# Computing microRNA-gene interaction networks in pan-cancer using miRDriver

Banabithi Bose, Matthew Moravec, and Serdar Bozdog

# Supplemental Figure S3

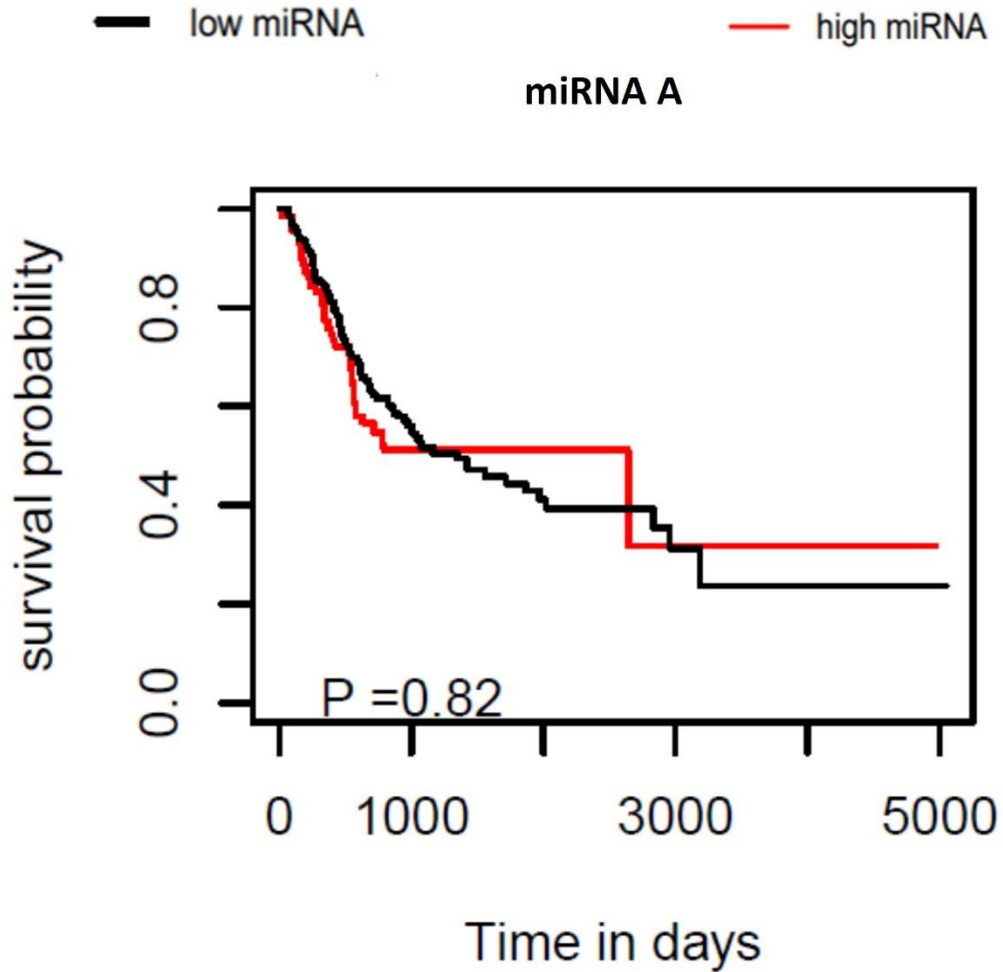

The *Adjusted Kaplan-Meier* survival plots for the computed miRNAs in high and low miRNA expression patient groups.

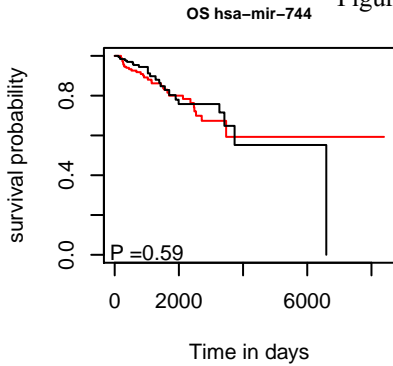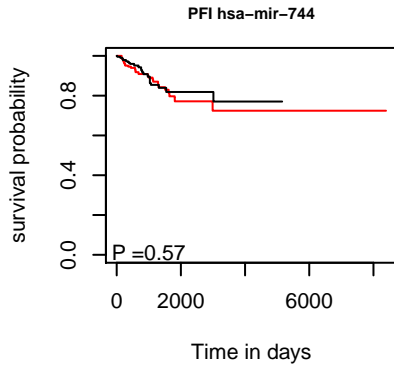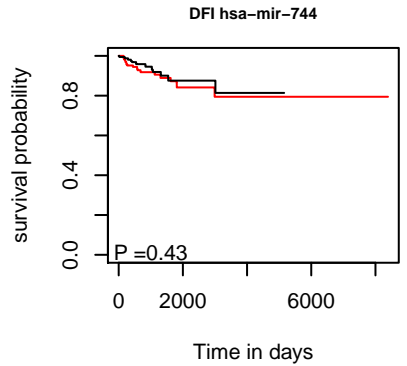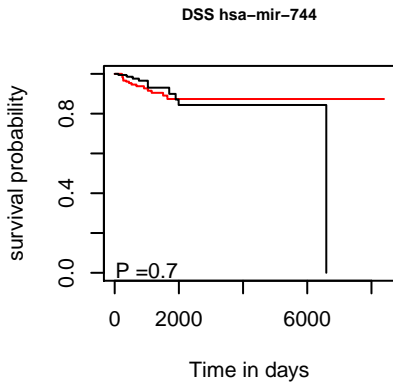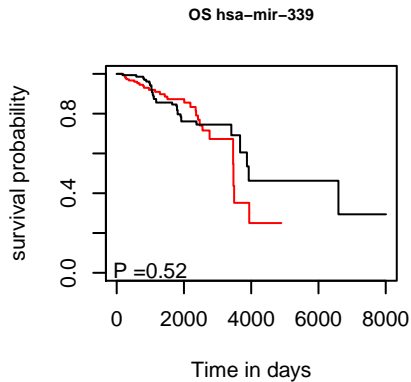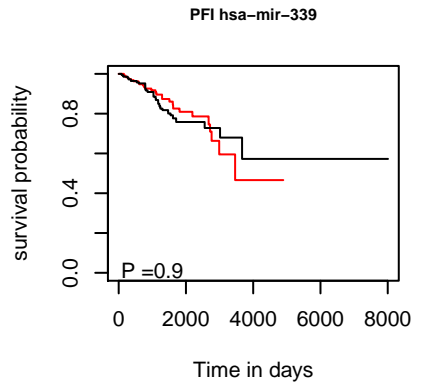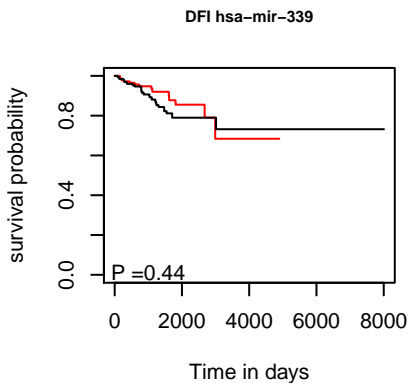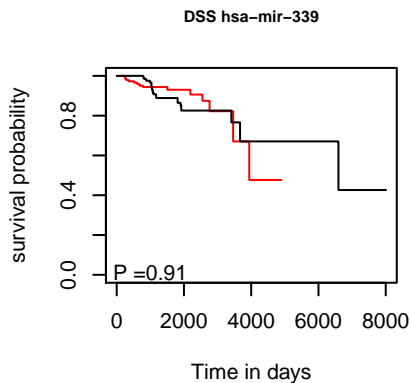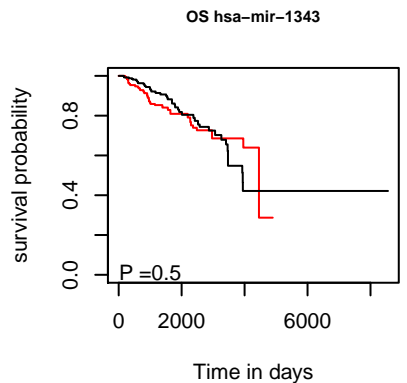

**PFI hsa-mir-1343**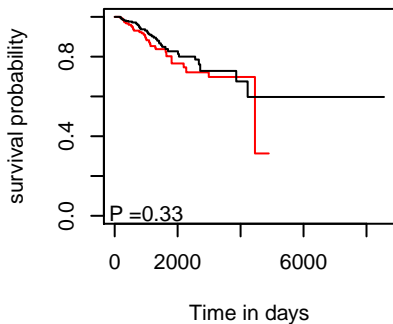**DFI hsa-mir-1343**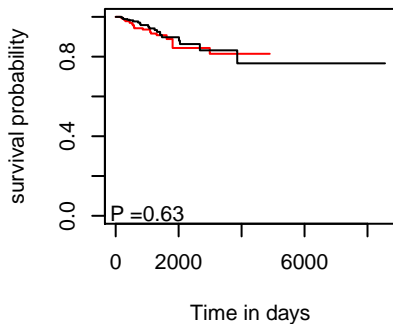**DSS hsa-mir-1343**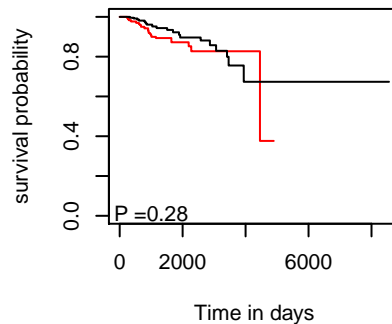**OS hsa-mir-4522**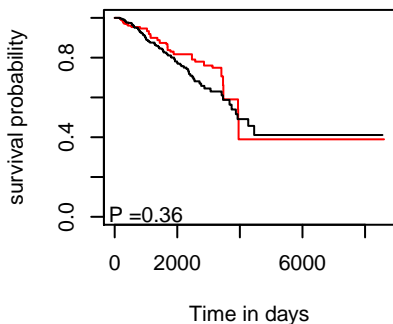**PFI hsa-mir-4522**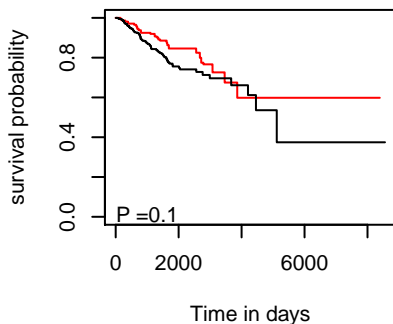**DFI hsa-mir-4522**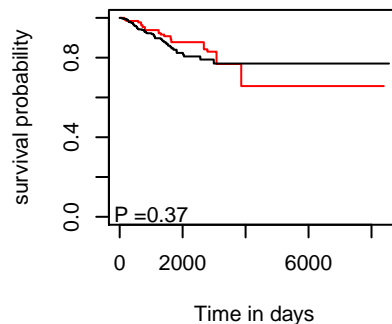**DSS hsa-mir-4522**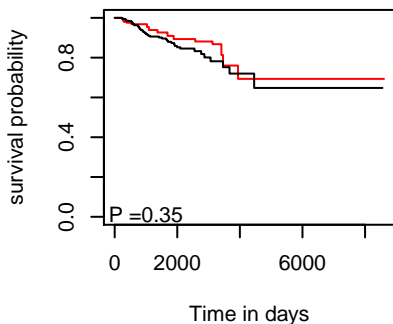**OS hsa-mir-642a**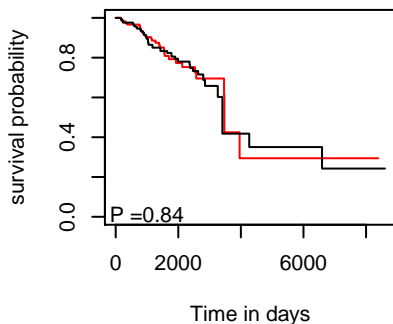**PFI hsa-mir-642a**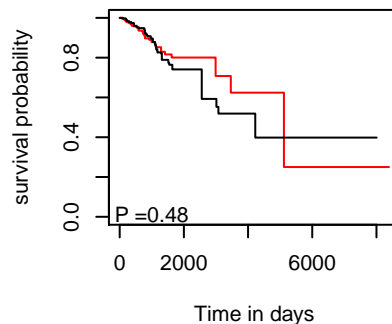



**DSS hsa-mir-769**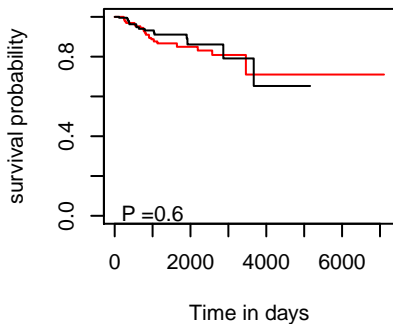**OS hsa-mir-3190**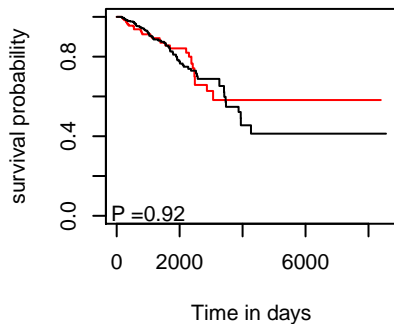**PFI hsa-mir-3190**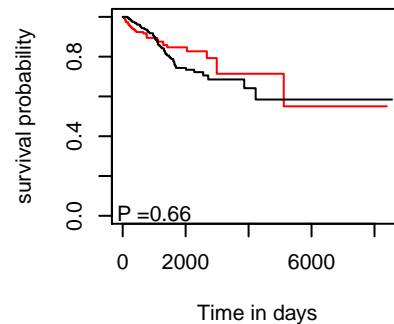**DFI hsa-mir-3190**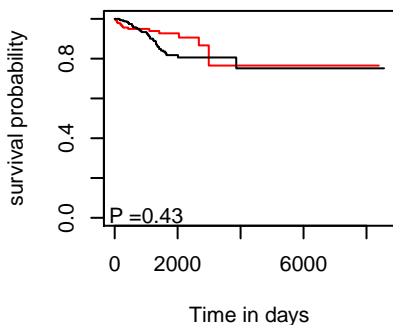**DSS hsa-mir-3190**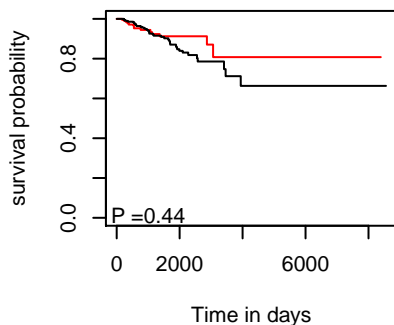**OS hsa-mir-320e**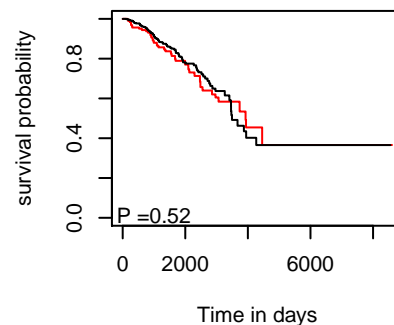**PFI hsa-mir-320e**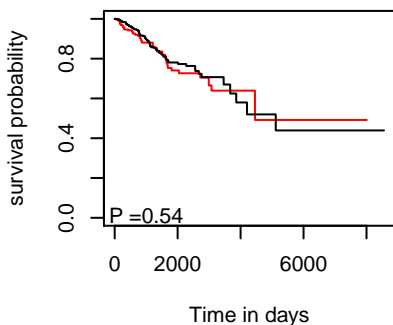**DFI hsa-mir-320e**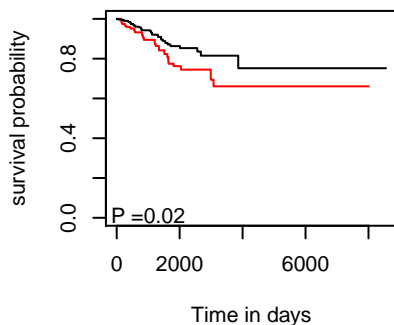**DSS hsa-mir-320e**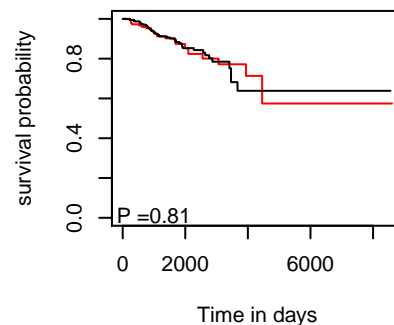

**OS hsa-mir-3191**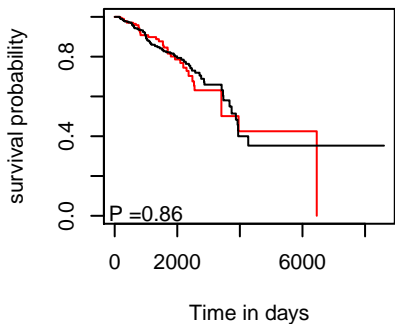**PFI hsa-mir-3191**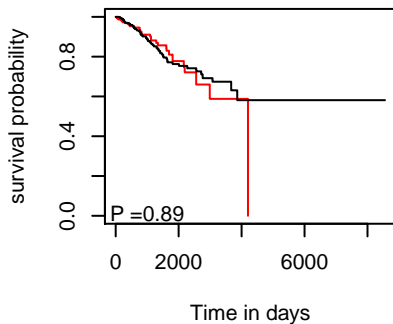**DFI hsa-mir-3191**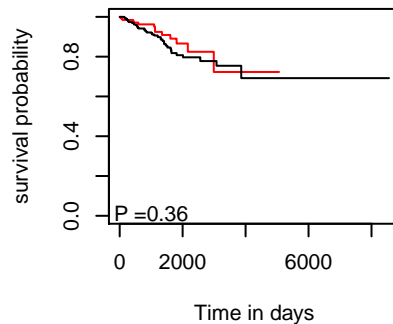**DSS hsa-mir-3191**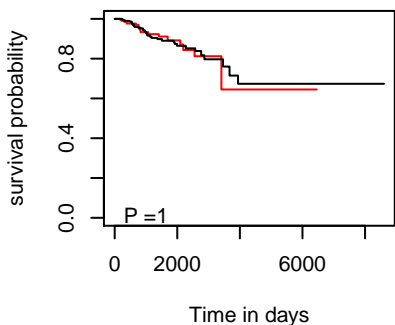**OS hsa-mir-1291**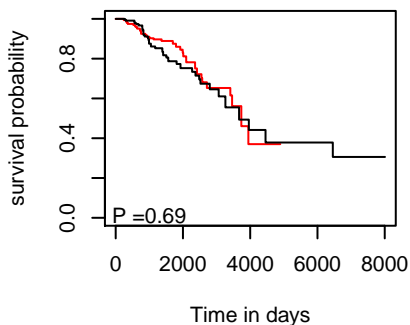**PFI hsa-mir-1291**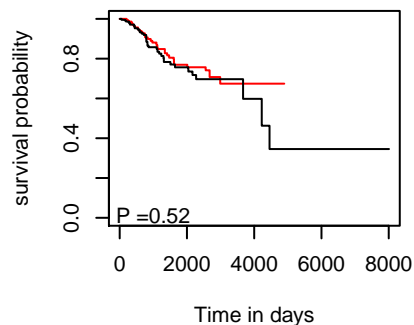**DFI hsa-mir-1291**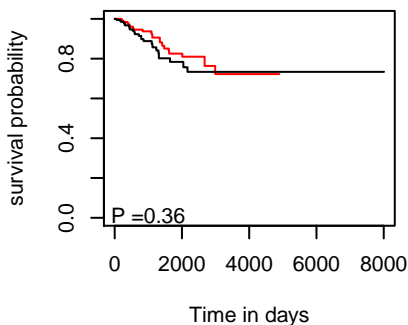**DSS hsa-mir-1291**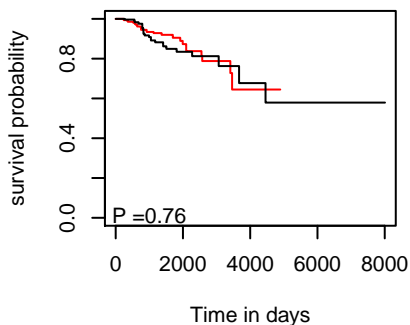**OS hsa-mir-31**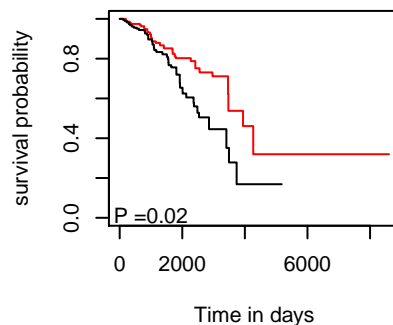

**PFI hsa-mir-31**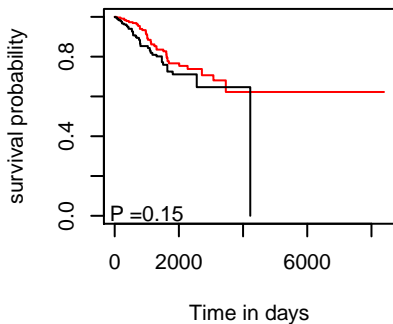**DFI hsa-mir-31**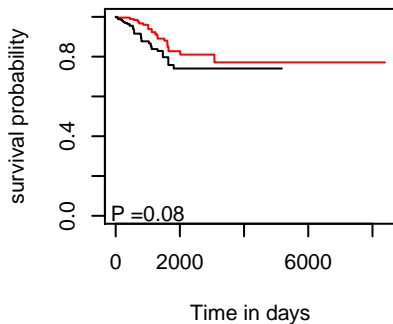**DSS hsa-mir-31**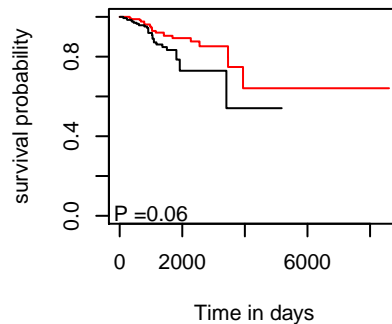**OS hsa-mir-1224**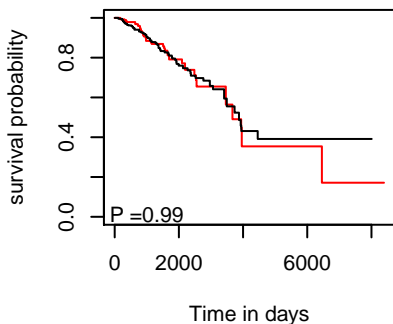**PFI hsa-mir-1224**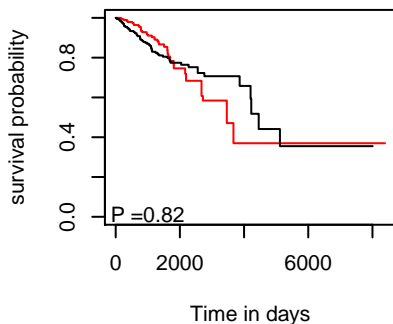**DFI hsa-mir-1224**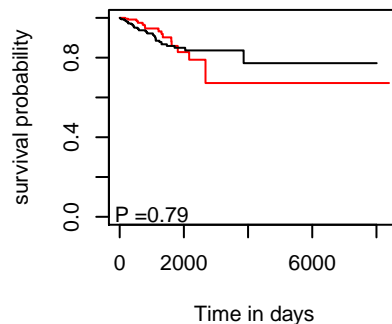**DSS hsa-mir-1224**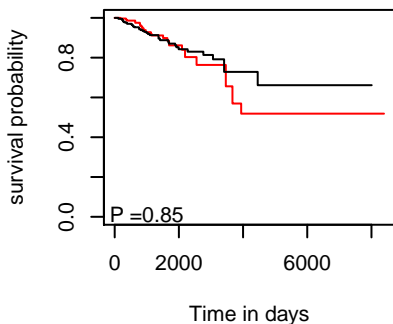**OS hsa-let-7b**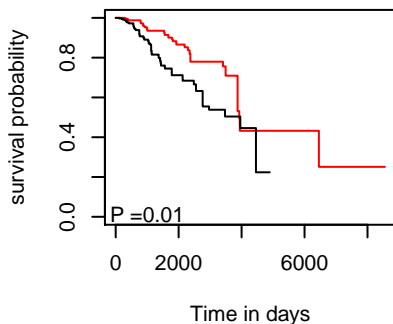**PFI hsa-let-7b**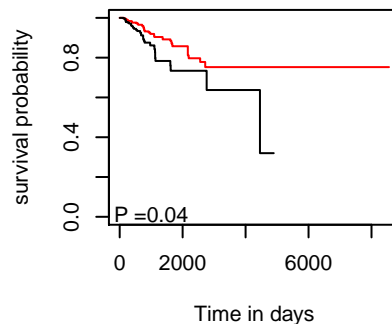





**OS hsa-mir-582**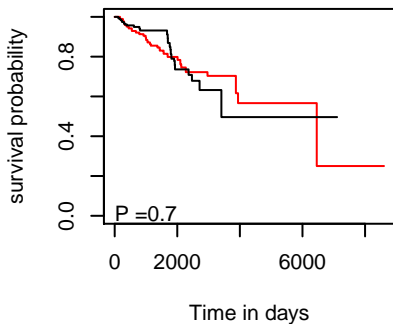**PFI hsa-mir-582**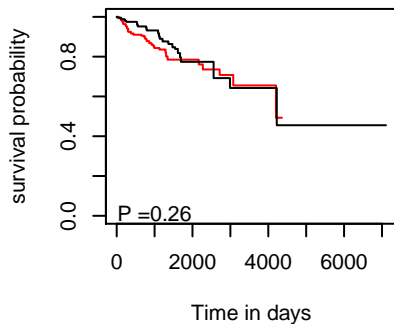**DFI hsa-mir-582**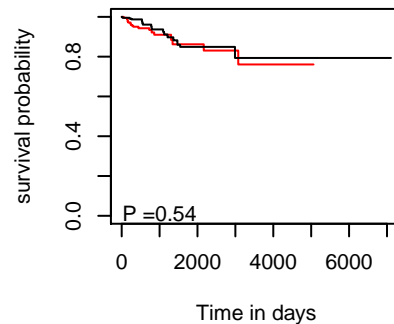**DSS hsa-mir-582**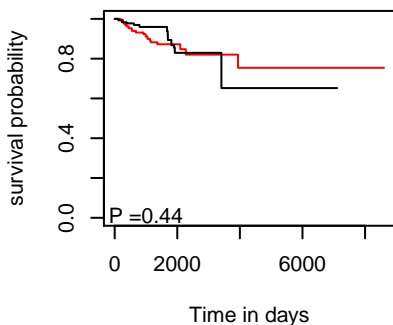**OS hsa-mir-1910**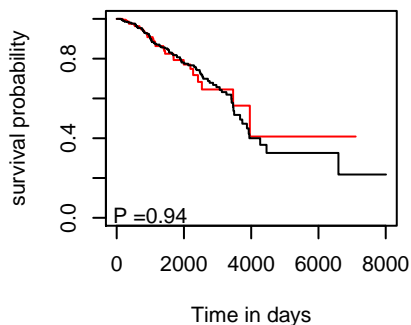**PFI hsa-mir-1910**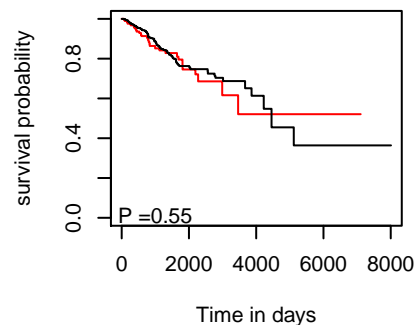**DFI hsa-mir-1910**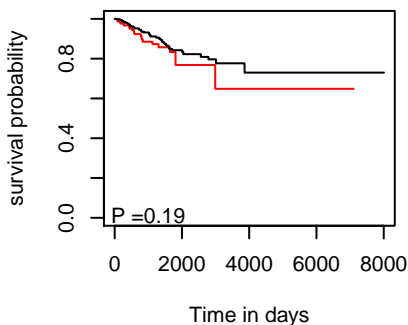**DSS hsa-mir-1910**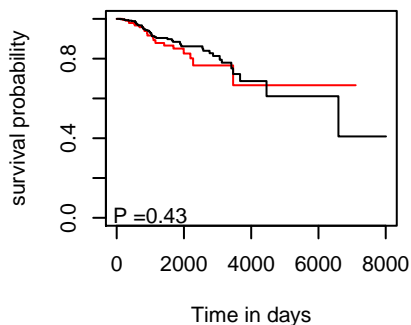**OS hsa-mir-449b**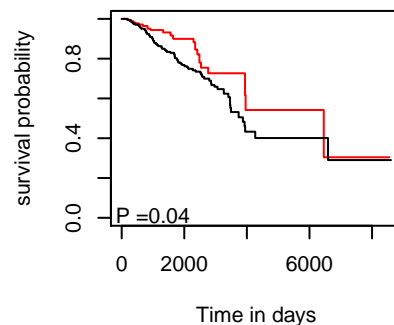

**PFI hsa-mir-449b**

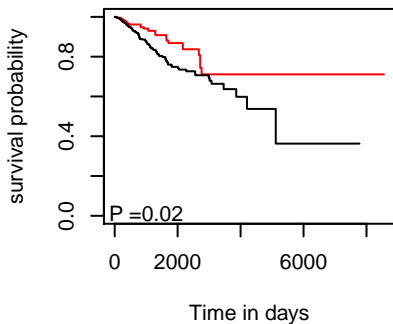

**DFI hsa-mir-449b**

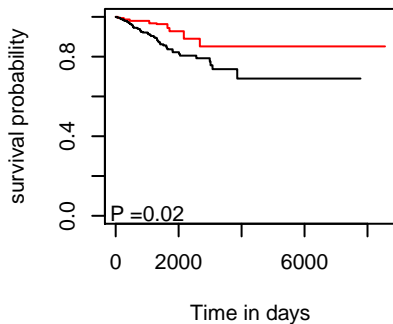

**DSS hsa-mir-449b**

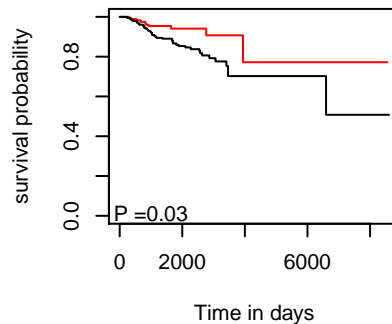

**OS hsa-let-7a-3**

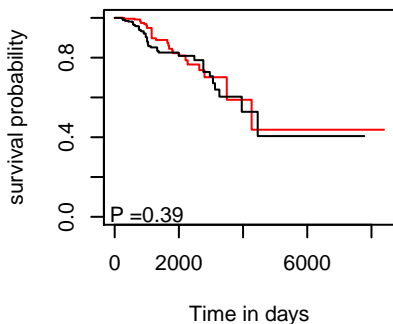

**PFI hsa-let-7a-3**

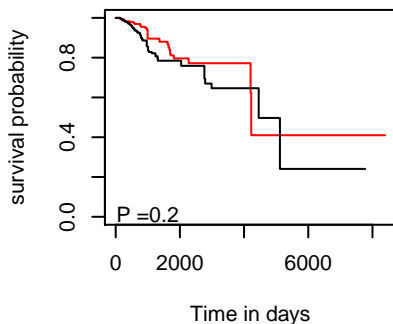

**DFI hsa-let-7a-3**

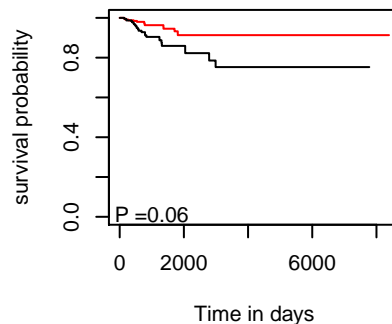

**DSS hsa-let-7a-3**

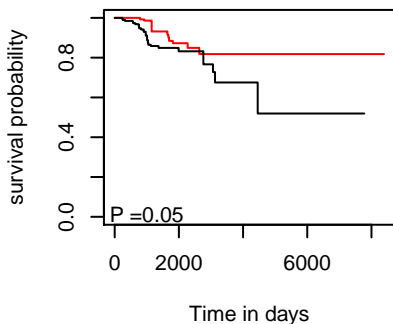

**OS hsa-mir-4763**

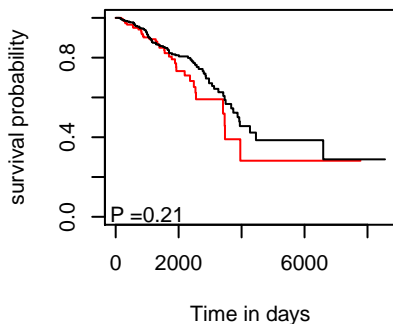

**PFI hsa-mir-4763**

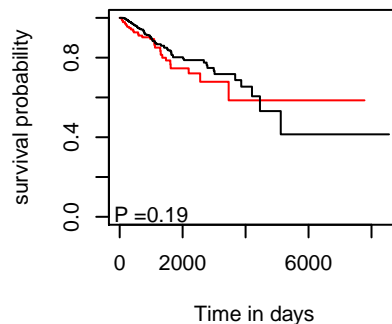

**DFI hsa-mir-4763**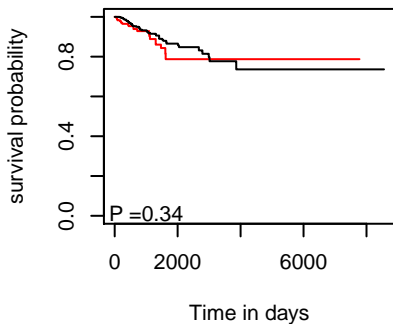**DSS hsa-mir-4763**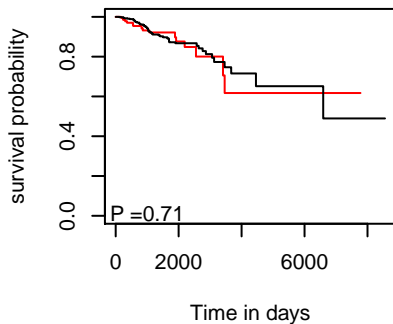**OS hsa-mir-7854**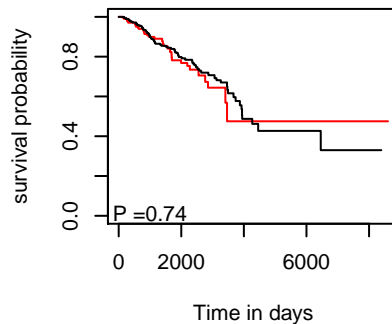**PFI hsa-mir-7854**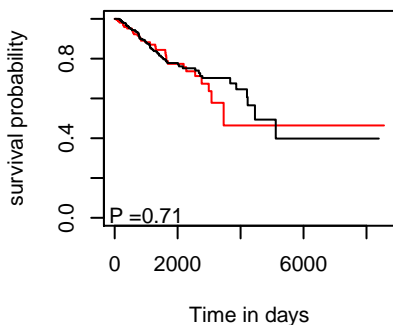**DFI hsa-mir-7854**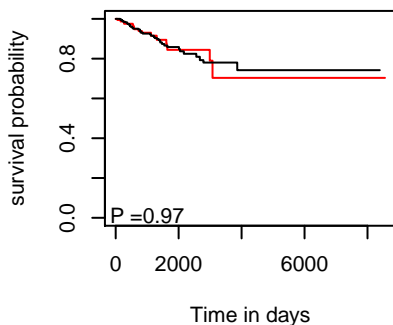**DSS hsa-mir-7854**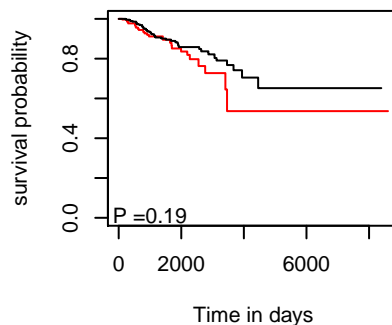**OS hsa-mir-3913-1**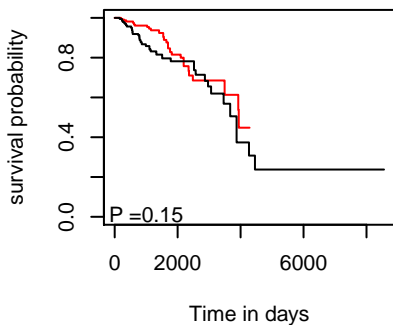**PFI hsa-mir-3913-1**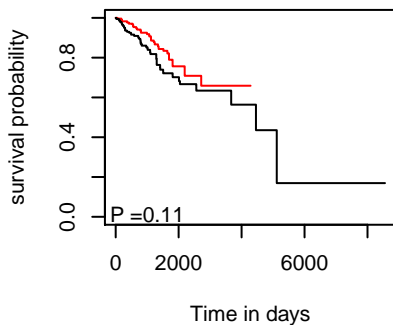**DFI hsa-mir-3913-1**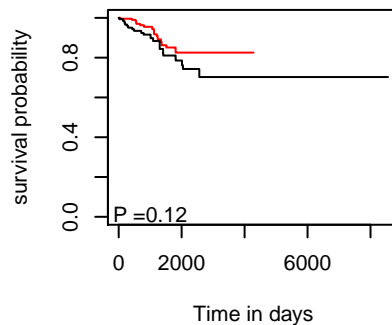

**DSS hsa-mir-3913-1**

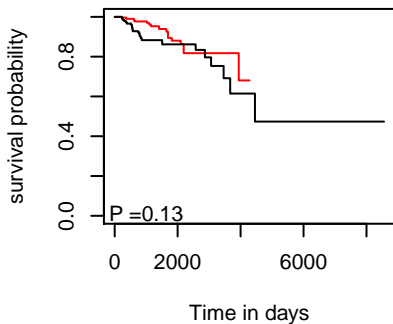

**OS hsa-mir-6502**

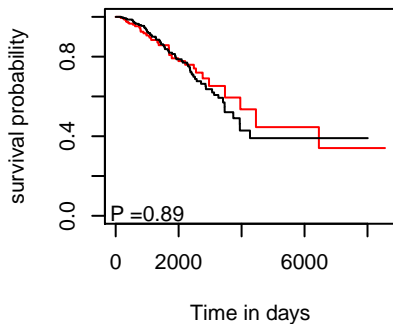

**PFI hsa-mir-6502**

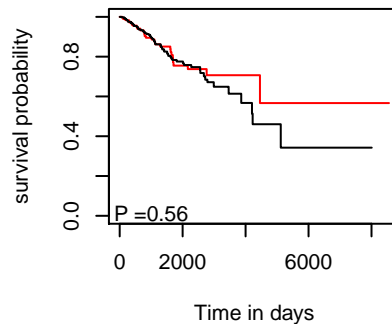

**DFI hsa-mir-6502**

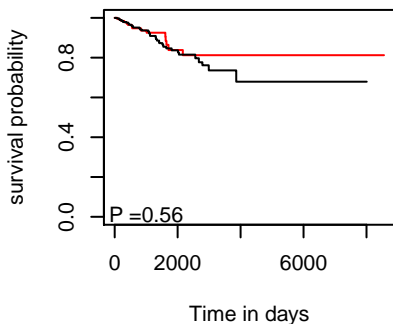

**DSS hsa-mir-6502**

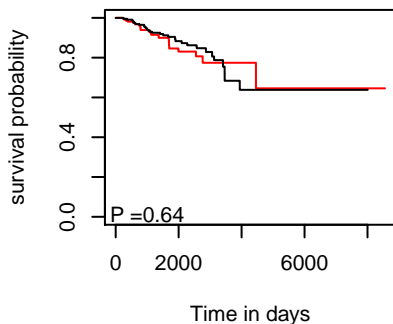

**OS hsa-mir-449a**

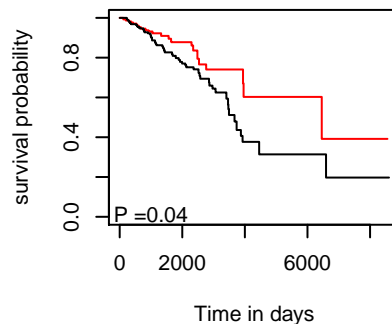

**PFI hsa-mir-449a**

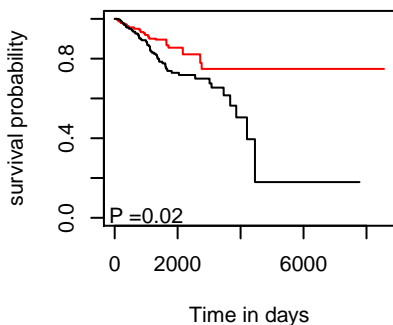

**DFI hsa-mir-449a**

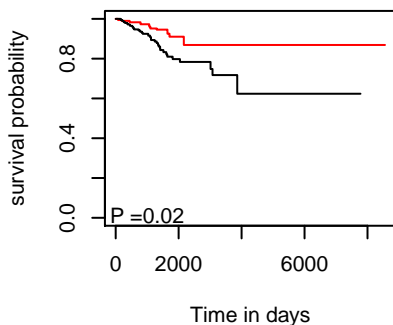

**DSS hsa-mir-449a**

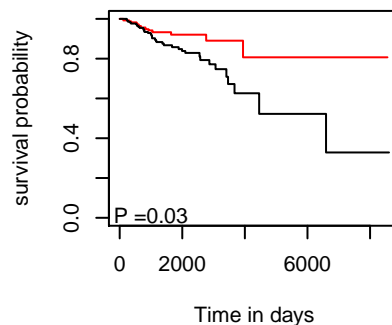

**OS hsa-mir-3678**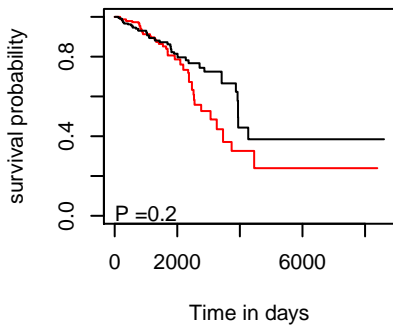**PFI hsa-mir-3678**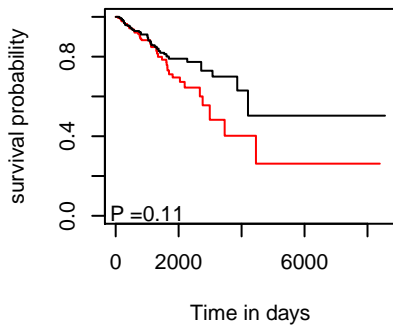**DFI hsa-mir-3678**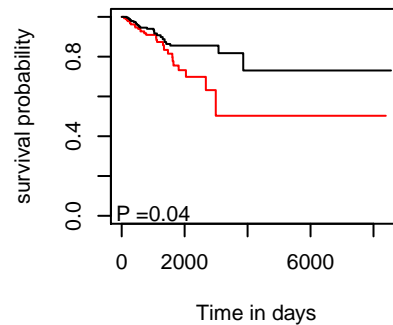**DSS hsa-mir-3678**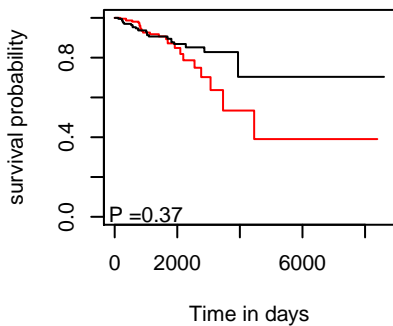**OS hsa-mir-142**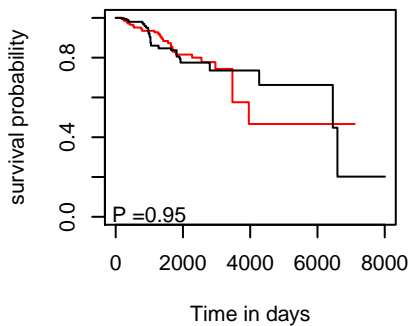**PFI hsa-mir-142**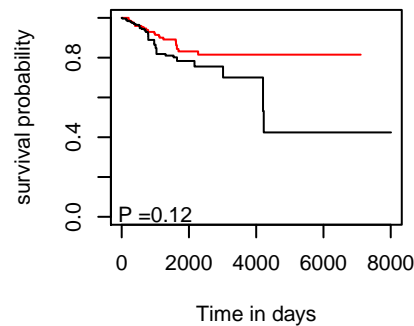**DFI hsa-mir-142**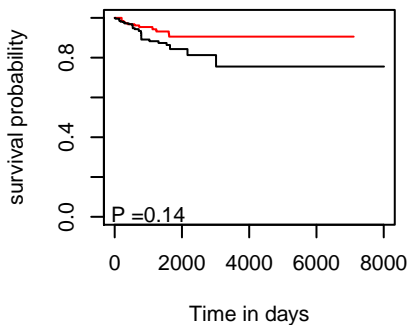**DSS hsa-mir-142**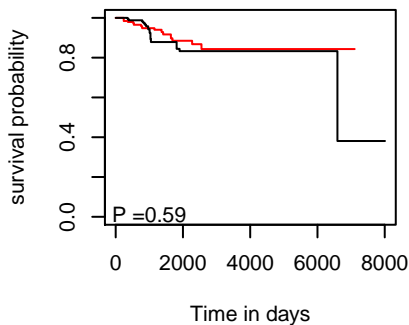**OS hsa-mir-152**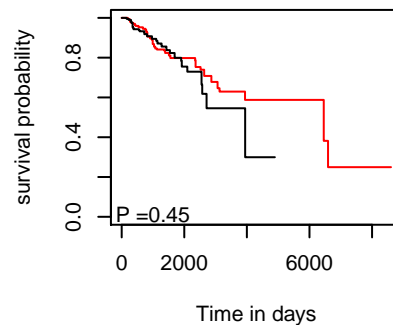

**PFI hsa-mir-152**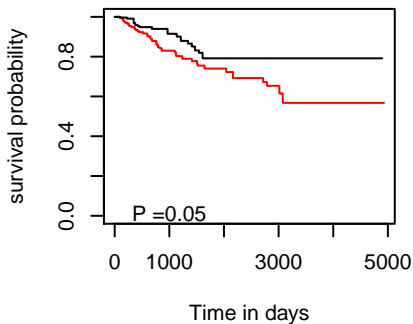**DFI hsa-mir-152**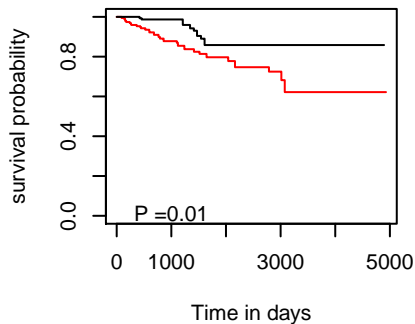**DSS hsa-mir-152**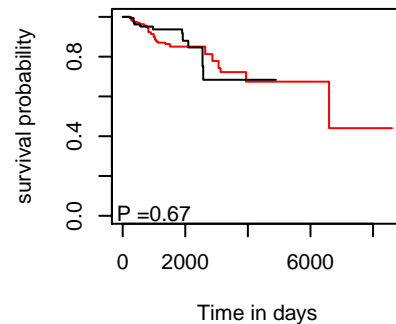**OS hsa-mir-21**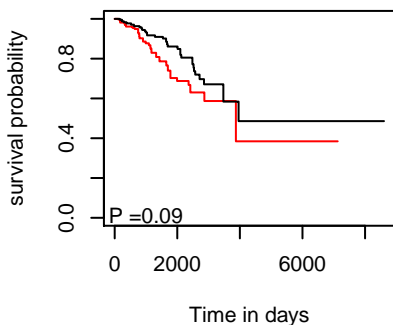**PFI hsa-mir-21**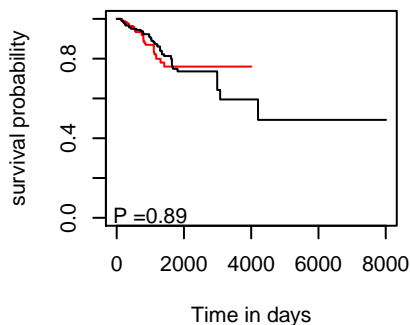**DFI hsa-mir-21**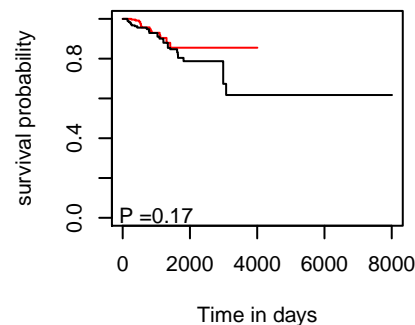**DSS hsa-mir-21**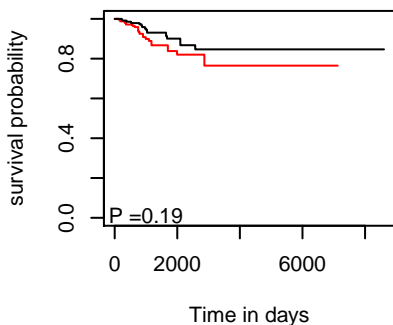**OS hsa-mir-3064**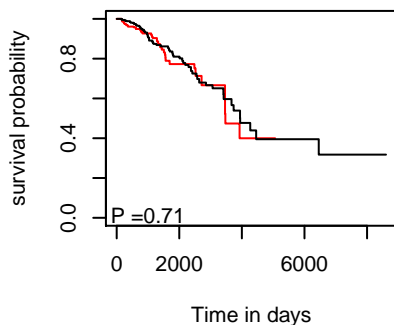**PFI hsa-mir-3064**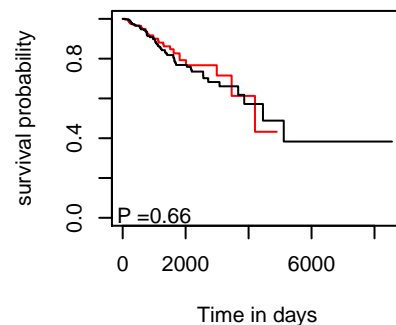

**DFI hsa-mir-3064**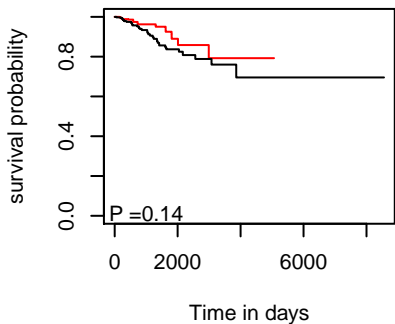**DSS hsa-mir-3064**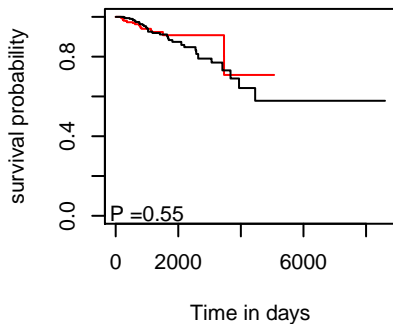**OS hsa-mir-338**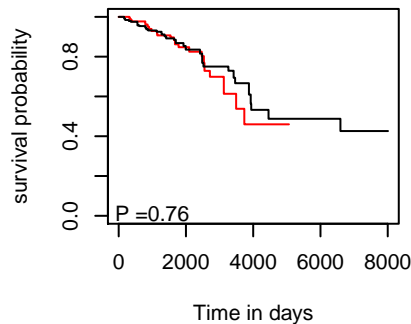**PFI hsa-mir-338**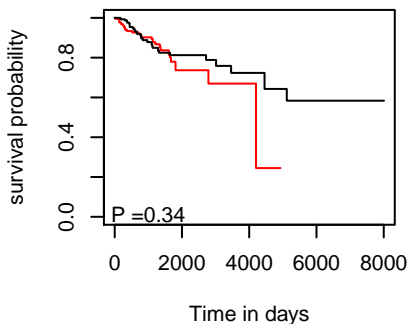**DFI hsa-mir-338**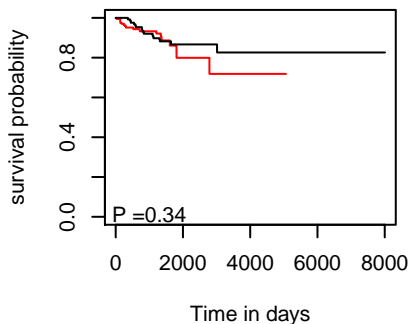**DSS hsa-mir-338**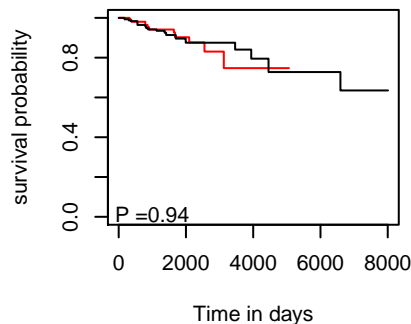**OS hsa-mir-3615**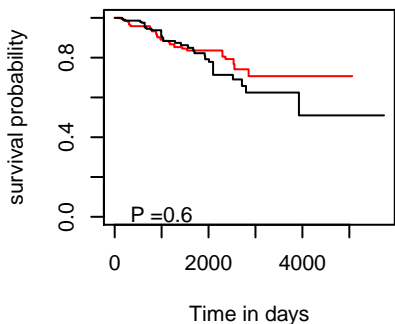**PFI hsa-mir-3615**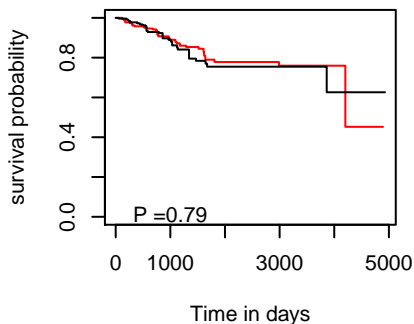**DFI hsa-mir-3615**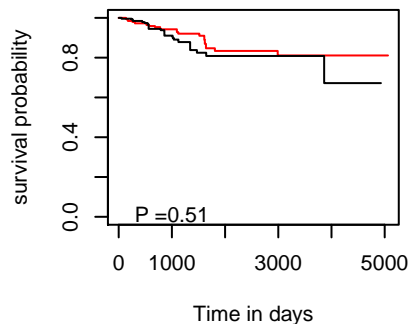

**DSS hsa-mir-3615**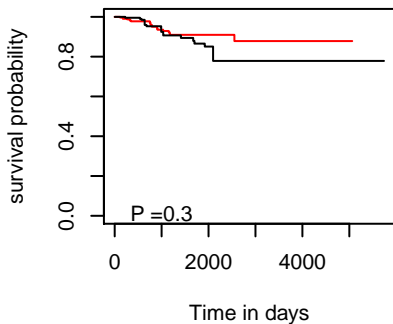**OS hsa-mir-454**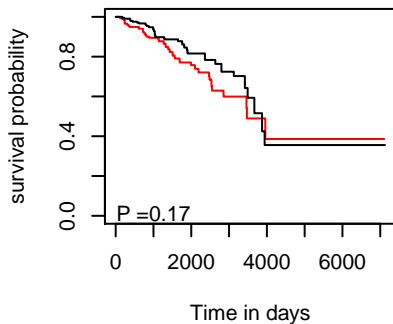**PFI hsa-mir-454**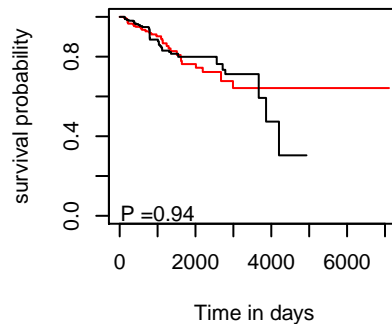**DFI hsa-mir-454**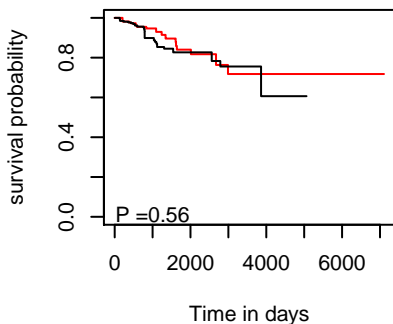**DSS hsa-mir-454**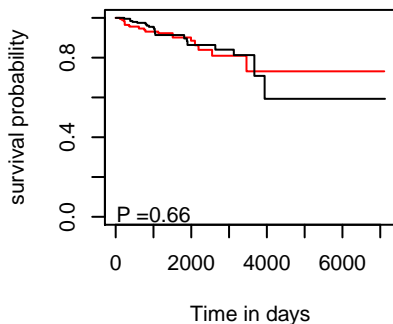**OS hsa-mir-4726**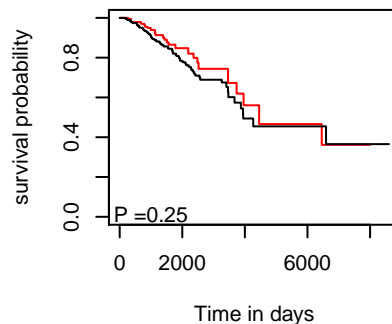**PFI hsa-mir-4726**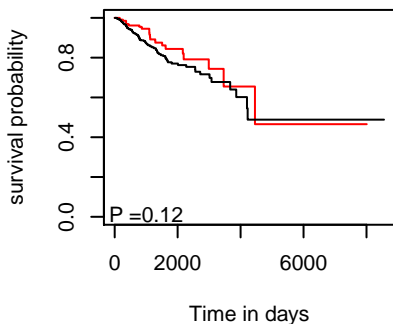**DFI hsa-mir-4726**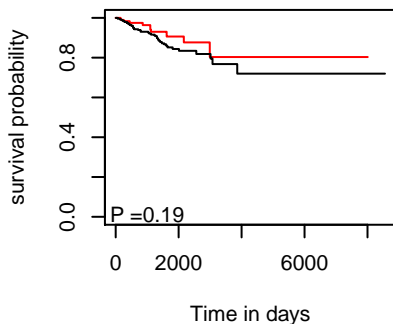**DSS hsa-mir-4726**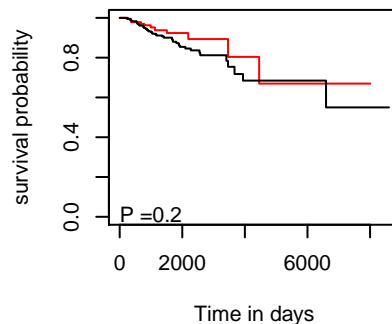

**OS hsa-mir-4728**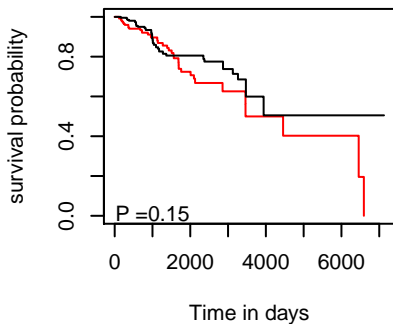**PFI hsa-mir-4728**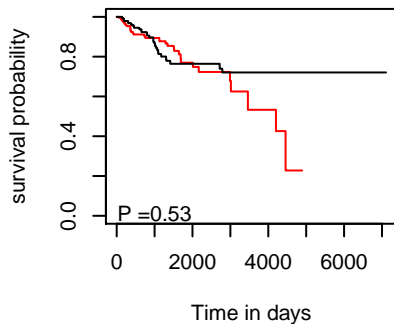**DFI hsa-mir-4728**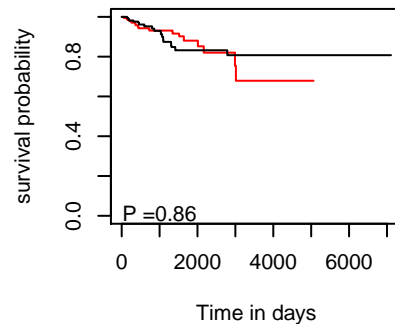**DSS hsa-mir-4728**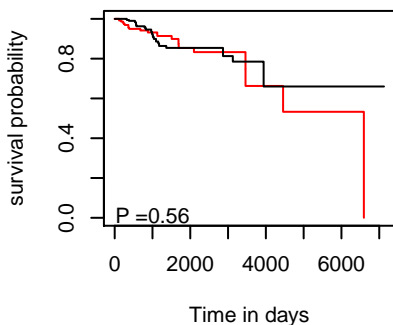**OS hsa-mir-5010**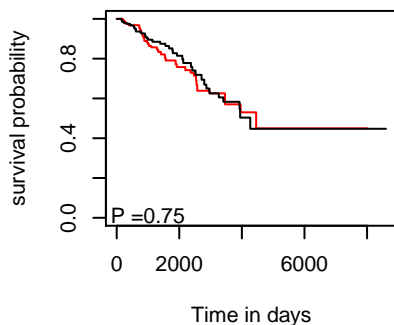**PFI hsa-mir-5010**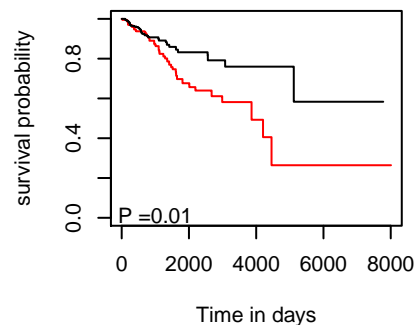**DFI hsa-mir-5010**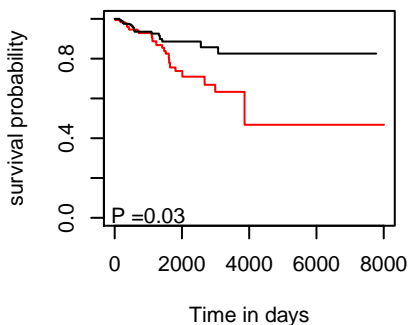**DSS hsa-mir-5010**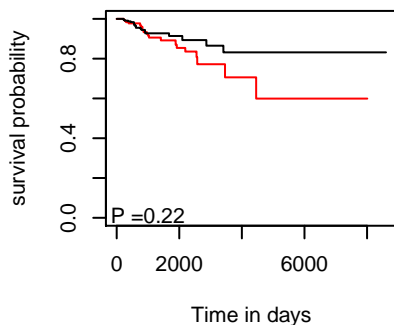**OS hsa-mir-636**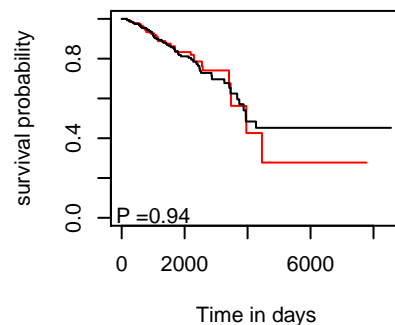

**PFI hsa-mir-636**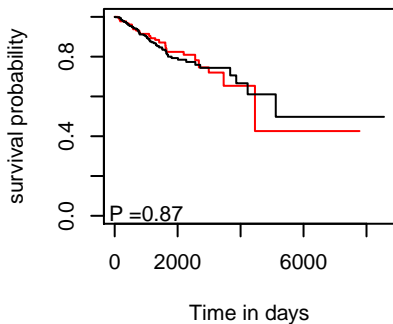**DFI hsa-mir-636**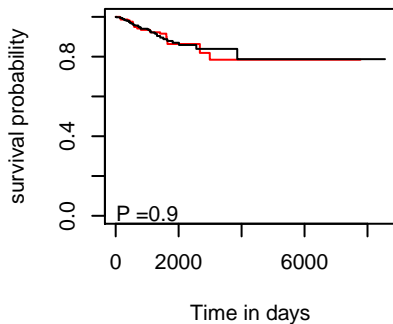**DSS hsa-mir-636**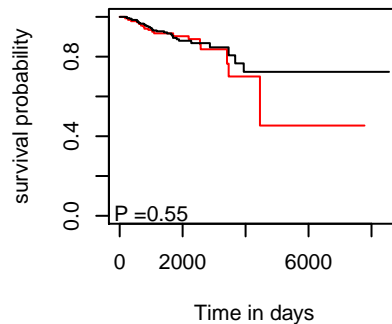**OS hsa-mir-6781**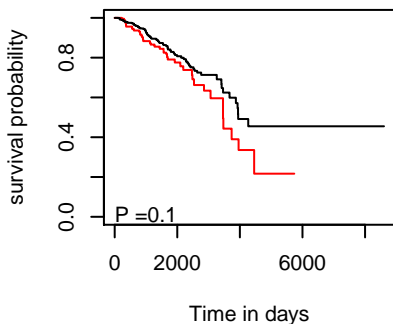**PFI hsa-mir-6781**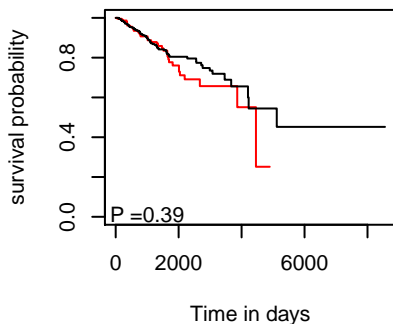**DFI hsa-mir-6781**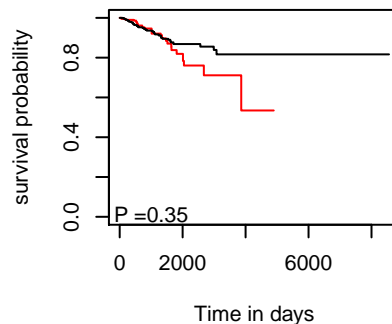**DSS hsa-mir-6781**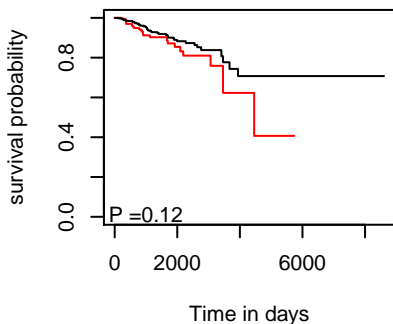**OS hsa-mir-6783**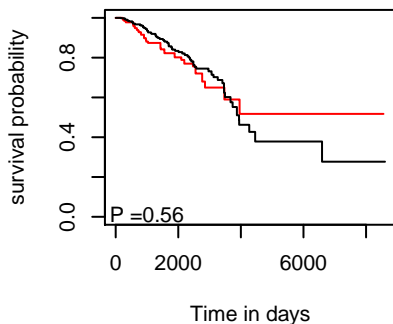**PFI hsa-mir-6783**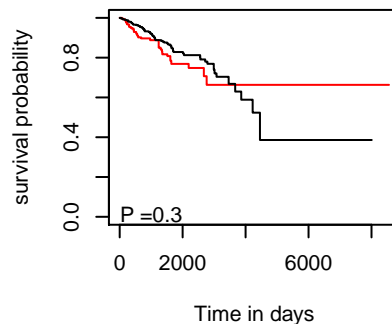

**DFI hsa-mir-6783**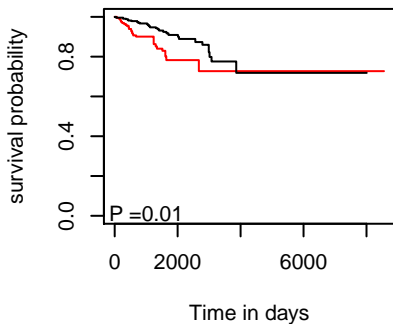**DSS hsa-mir-6783**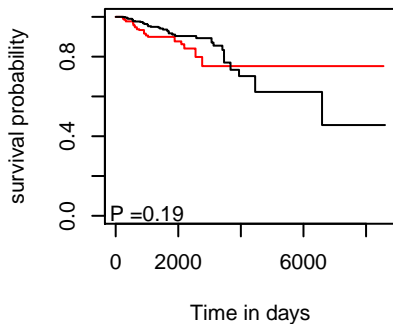**OS hsa-mir-4714**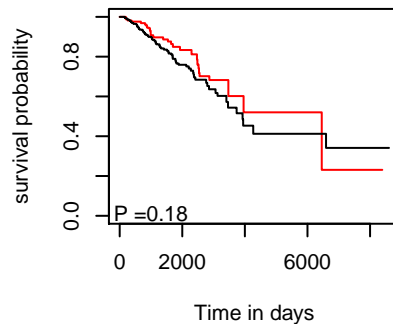**PFI hsa-mir-4714**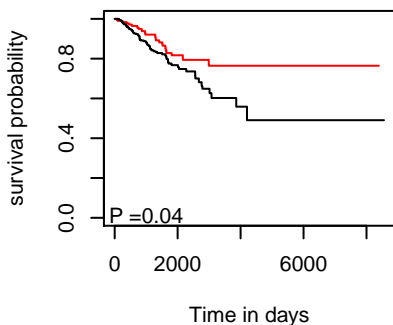**DFI hsa-mir-4714**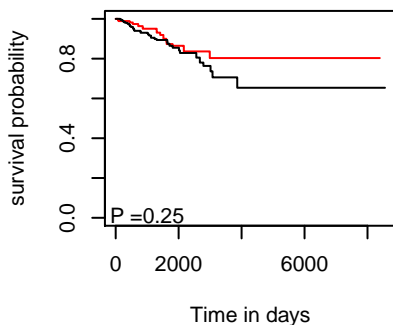**DSS hsa-mir-4714**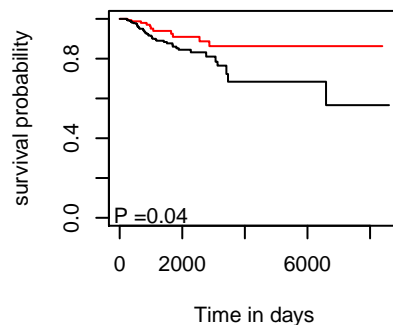**OS hsa-mir-3691**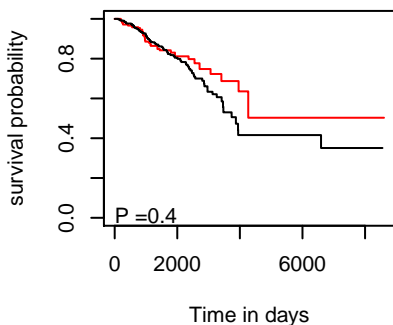**PFI hsa-mir-3691**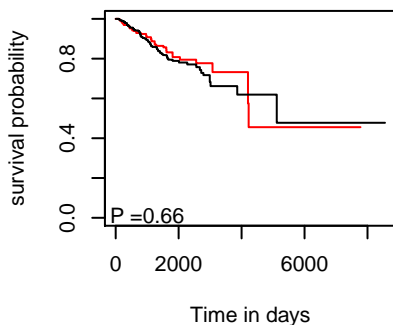**DFI hsa-mir-3691**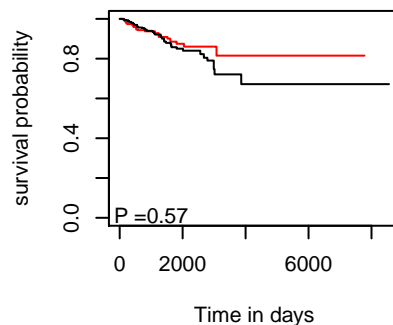



**OS hsa-mir-6720**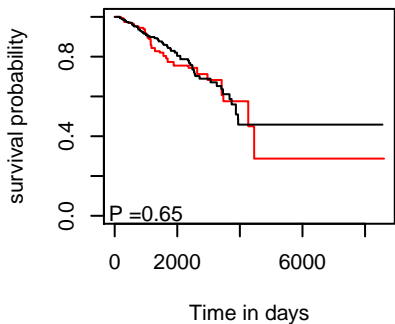**PFI hsa-mir-6720**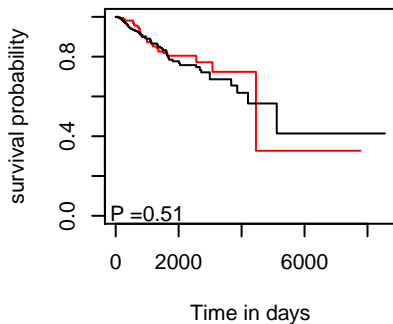**DFI hsa-mir-6720**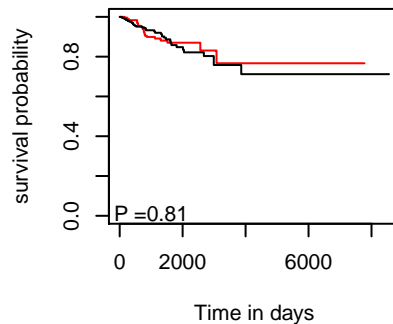**DSS hsa-mir-6720**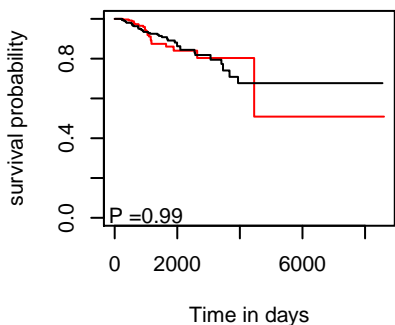**OS hsa-mir-153-2**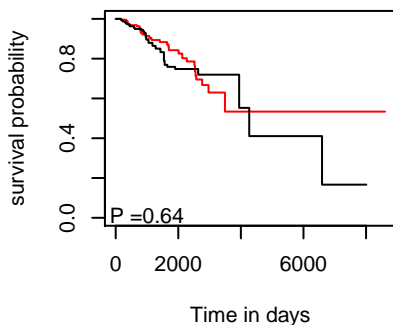**PFI hsa-mir-153-2**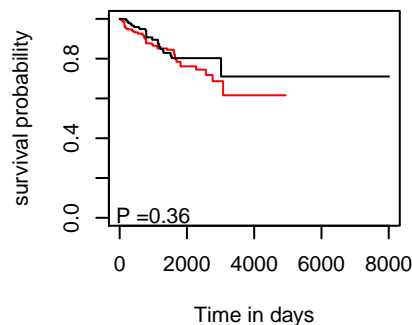**DFI hsa-mir-153-2**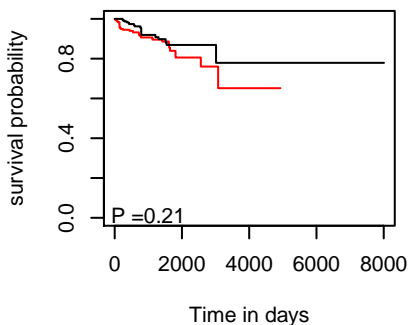**DSS hsa-mir-153-2**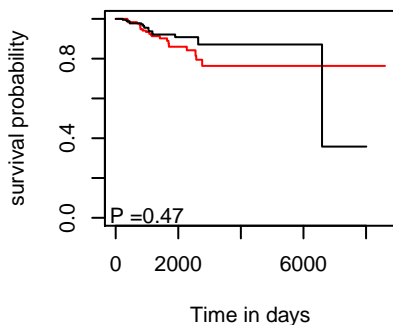**OS hsa-mir-4746**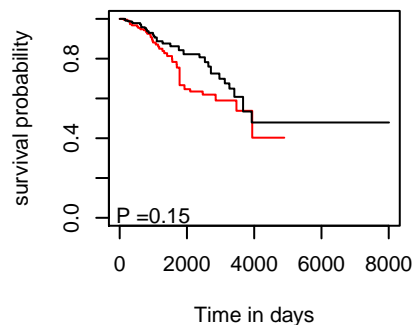

**PFI hsa-mir-4746**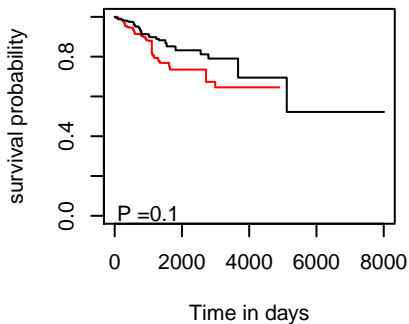**DFI hsa-mir-4746**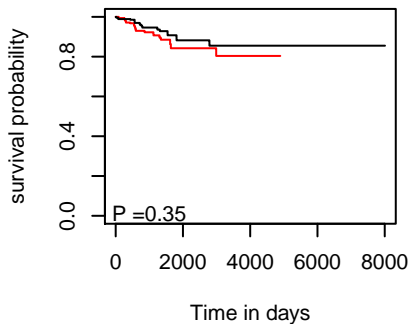**DSS hsa-mir-4746**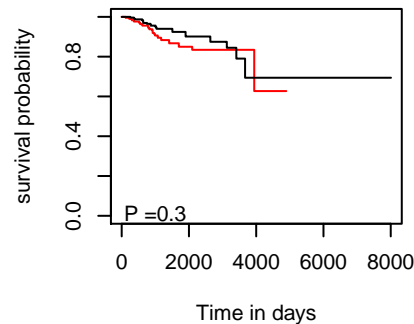**OS hsa-mir-3940**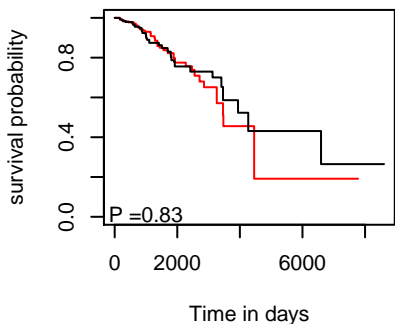**PFI hsa-mir-3940**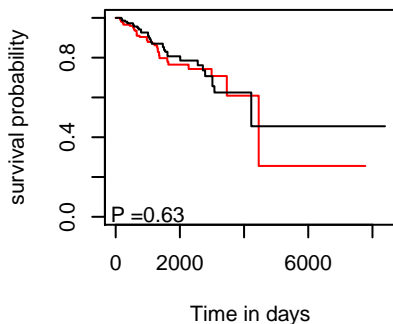**DFI hsa-mir-3940**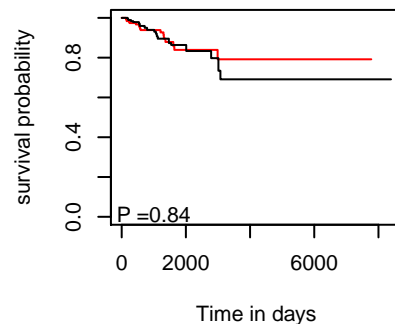**DSS hsa-mir-3940**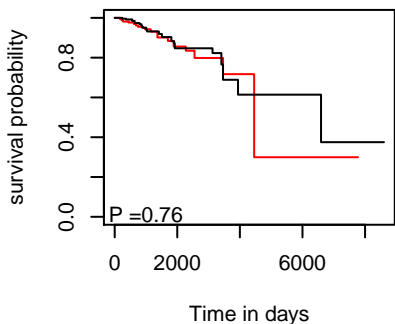**OS hsa-mir-5708**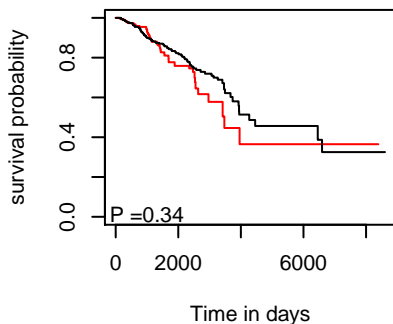**PFI hsa-mir-5708**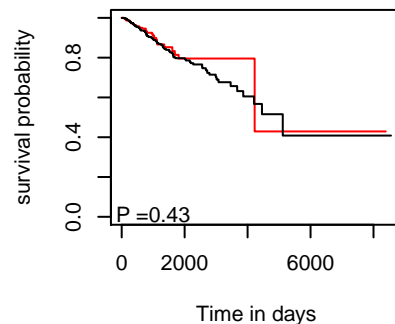

**DFI hsa-mir-5708**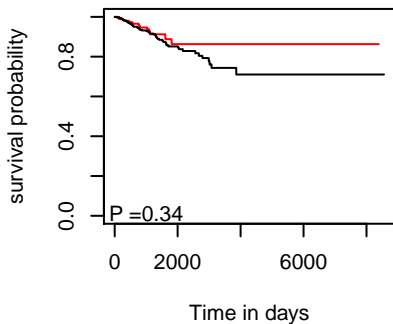**DSS hsa-mir-5708**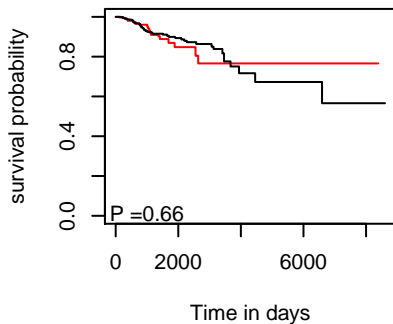**OS hsa-mir-4661**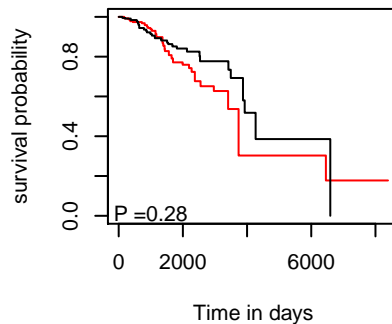**PFI hsa-mir-4661**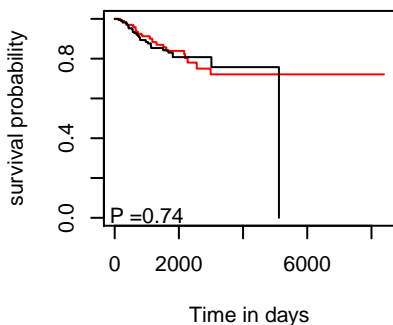**DFI hsa-mir-4661**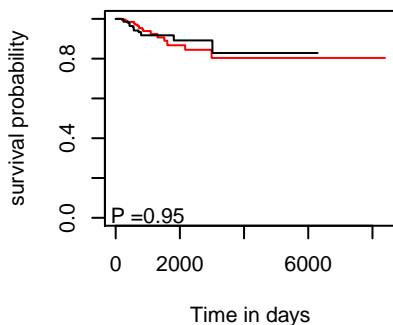**DSS hsa-mir-4661**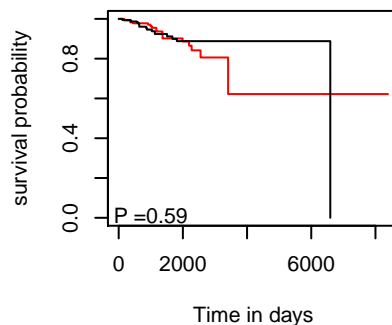**OS hsa-mir-6516**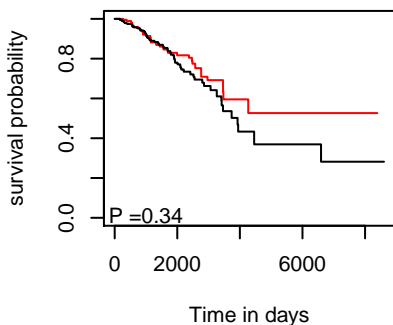**PFI hsa-mir-6516**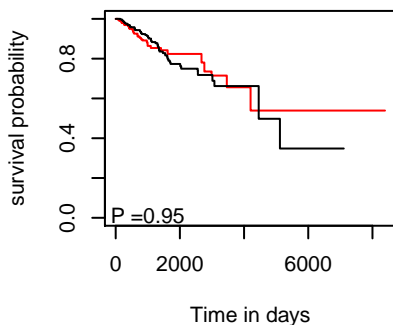**DFI hsa-mir-6516**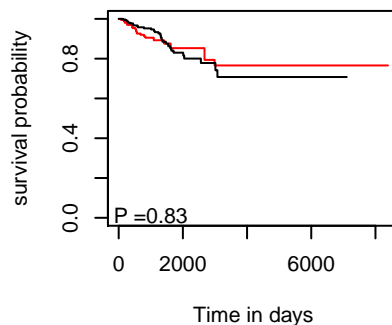

**DSS hsa-mir-6516**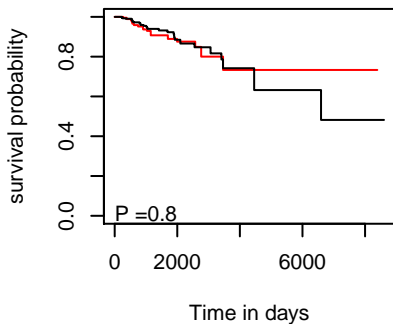**OS hsa-mir-3187**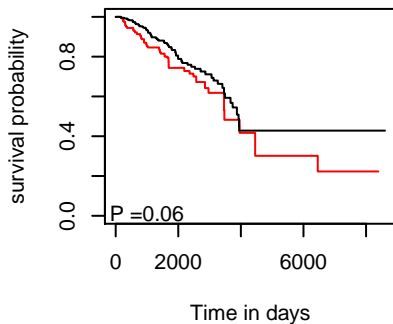**PFI hsa-mir-3187**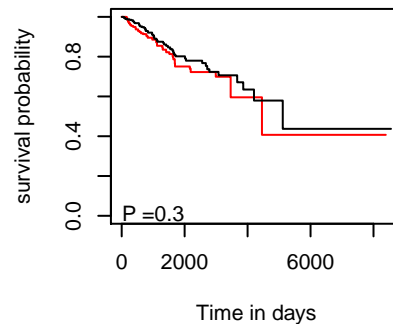**DFI hsa-mir-3187**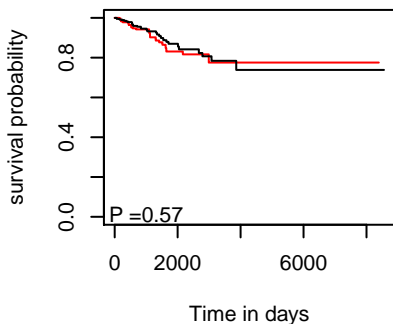**DSS hsa-mir-3187**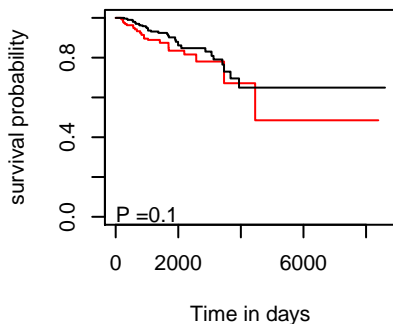**OS hsa-mir-6510**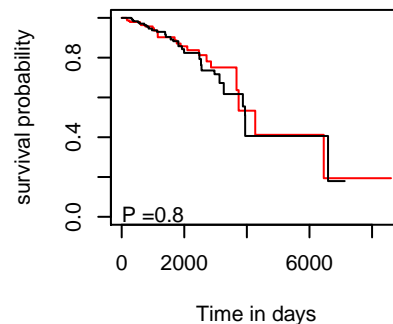**PFI hsa-mir-6510**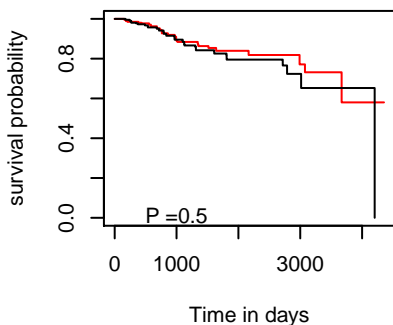**DFI hsa-mir-6510**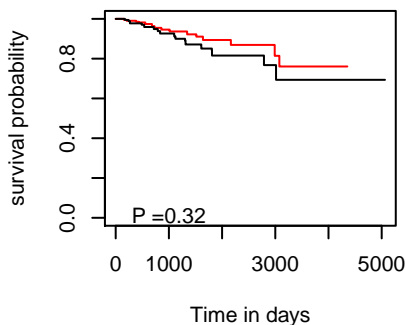**DSS hsa-mir-6510**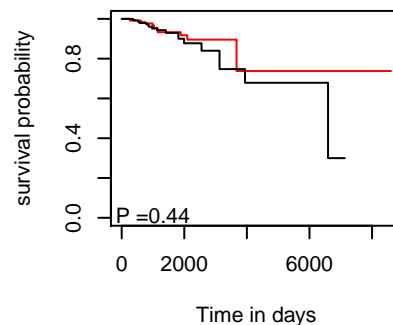

**OS hsa-mir-125b-2**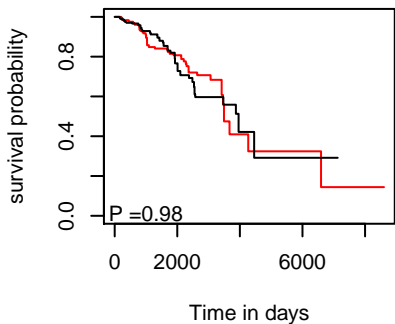**PFI hsa-mir-125b-2**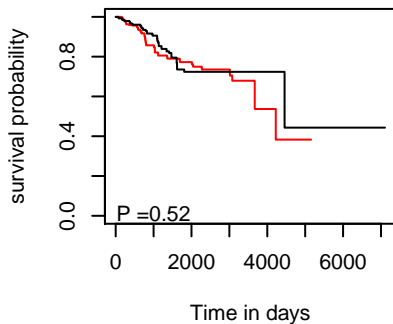**DFI hsa-mir-125b-2**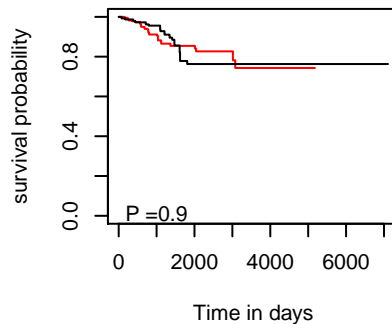**DSS hsa-mir-125b-2**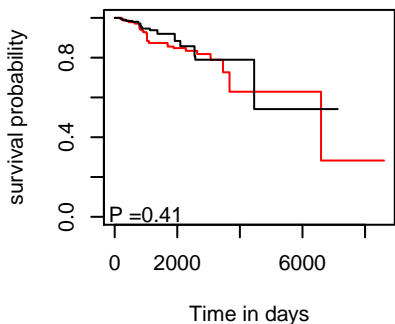**OS hsa-mir-3619**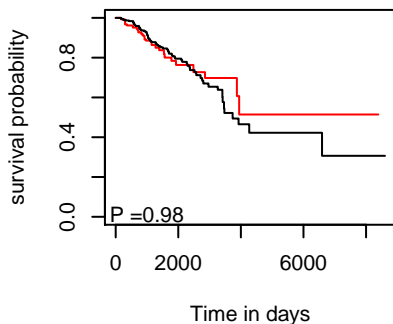**PFI hsa-mir-3619**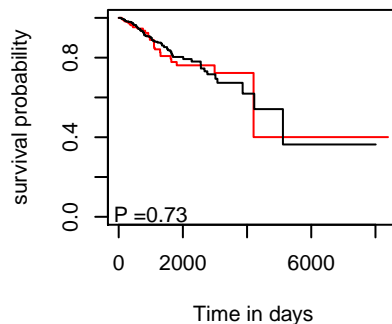**DFI hsa-mir-3619**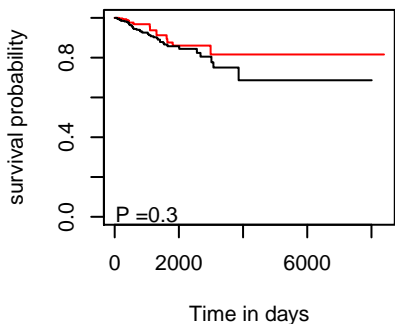**DSS hsa-mir-3619**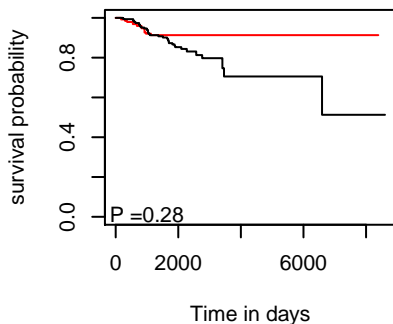**OS hsa-mir-3614**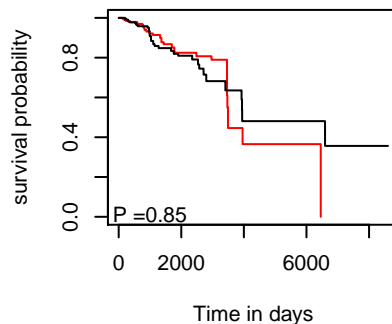

**PFI hsa-mir-3614**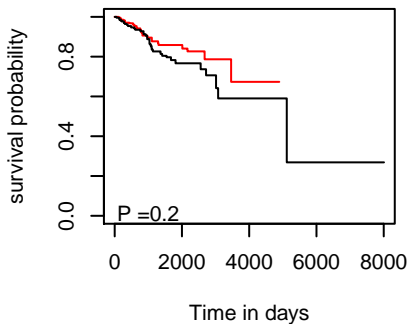**DFI hsa-mir-3614**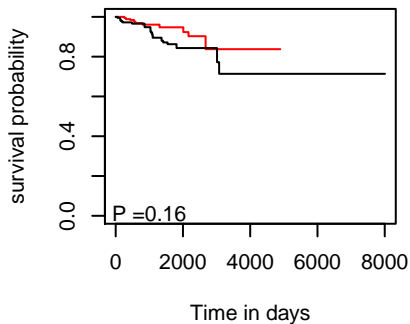**DSS hsa-mir-3614**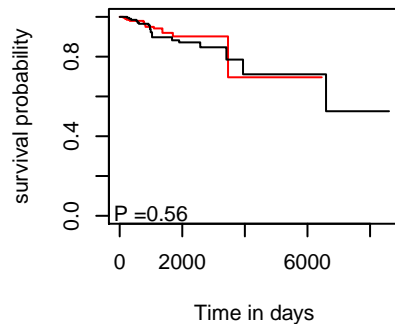**OS hsa-mir-194-2**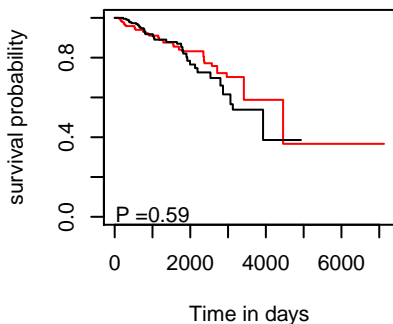**PFI hsa-mir-194-2**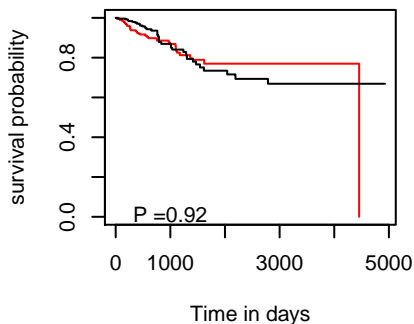**DFI hsa-mir-194-2**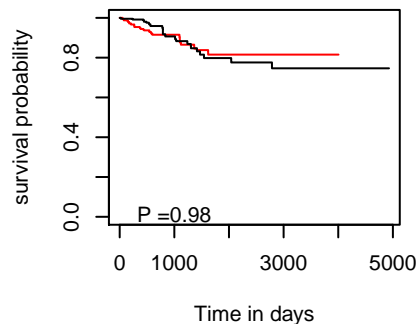**DSS hsa-mir-194-2**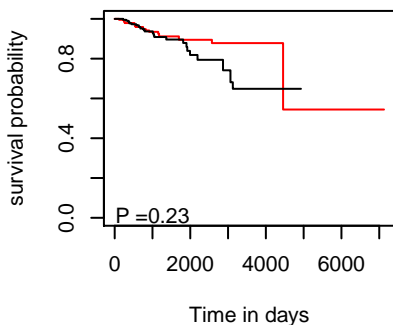**OS hsa-mir-6761**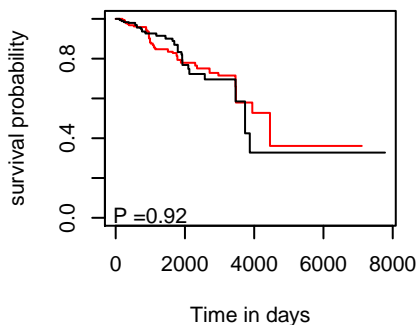**PFI hsa-mir-6761**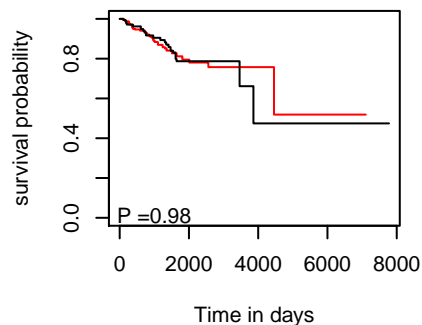

**DFI hsa-mir-6761**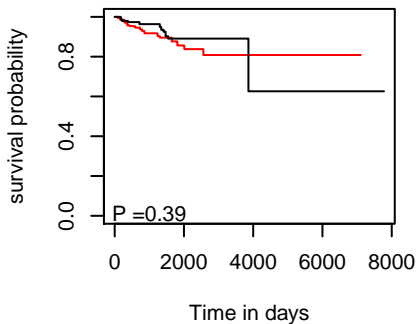**DSS hsa-mir-6761**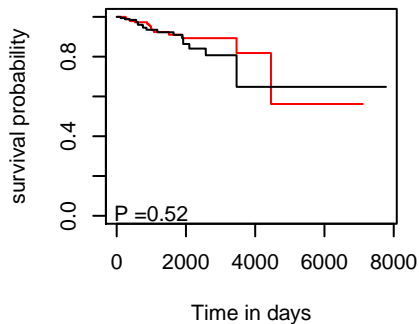**OS hsa-mir-3065**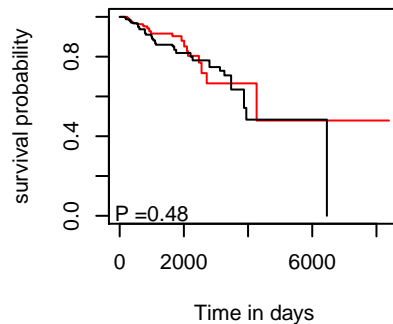**PFI hsa-mir-3065**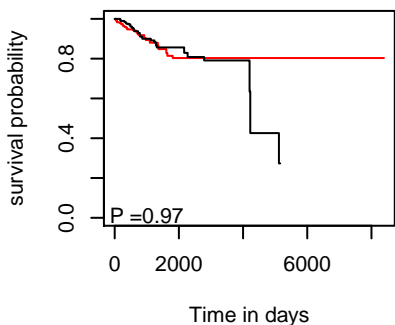**DFI hsa-mir-3065**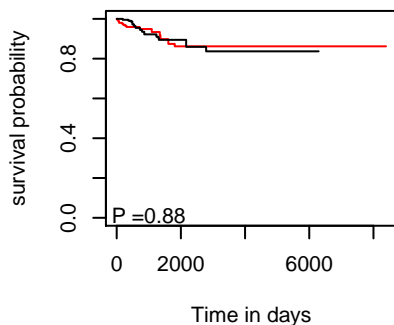**DSS hsa-mir-3065**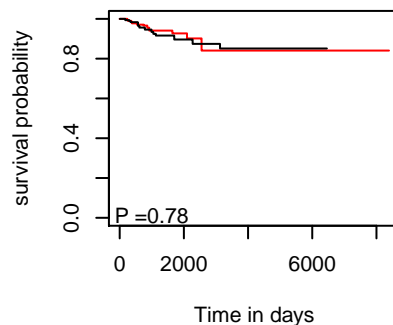**OS hsa-mir-326**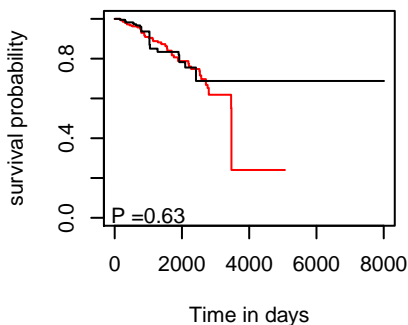**PFI hsa-mir-326**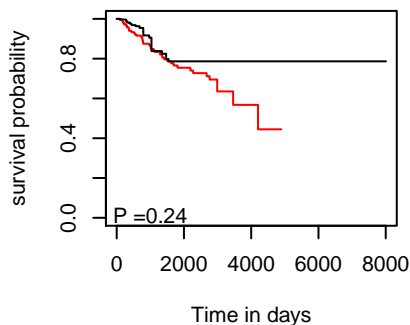**DFI hsa-mir-326**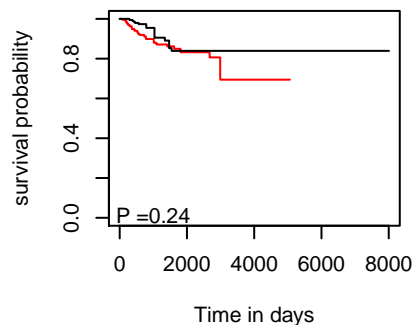

**DSS hsa-mir-326**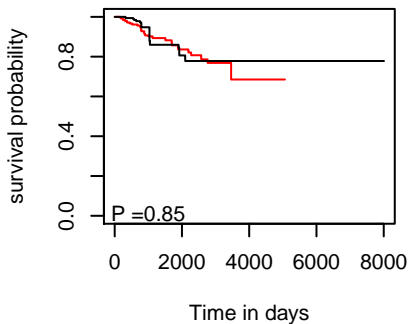**OS hsa-mir-6860**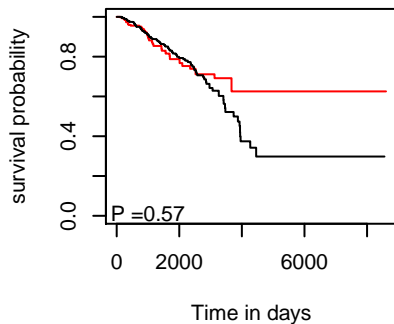**PFI hsa-mir-6860**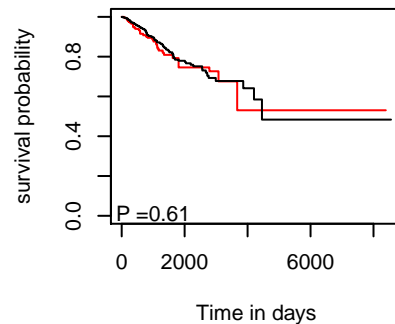**DFI hsa-mir-6860**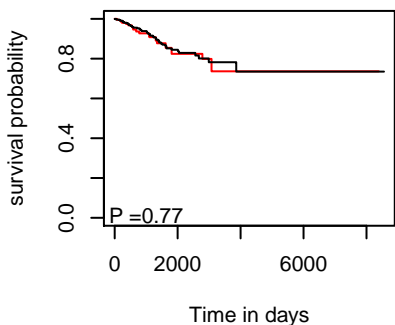**DSS hsa-mir-6860**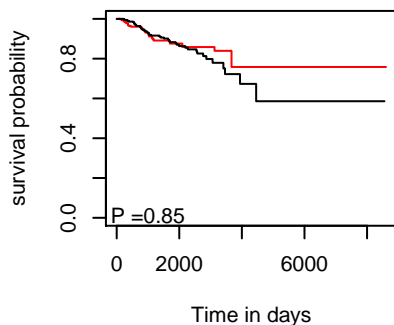**OS hsa-mir-3150b**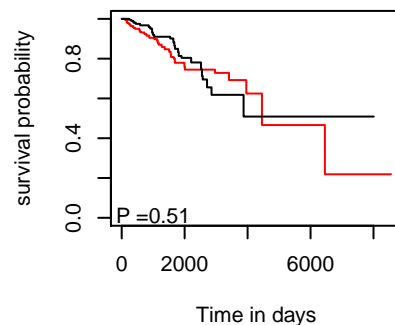**PFI hsa-mir-3150b**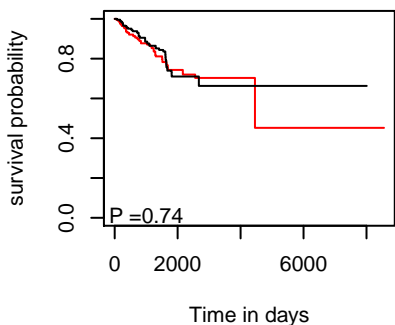**DFI hsa-mir-3150b**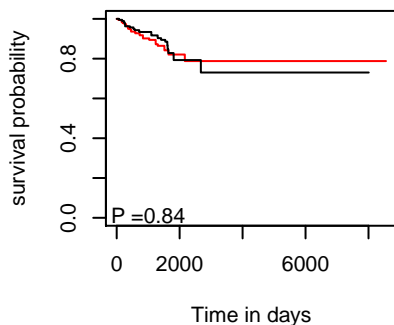**DSS hsa-mir-3150b**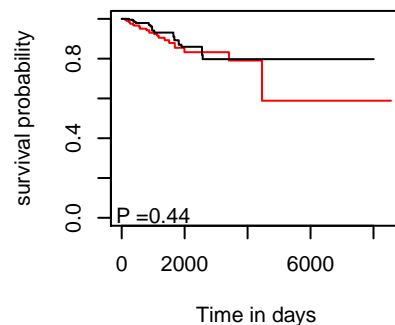

**OS hsa-mir-5680**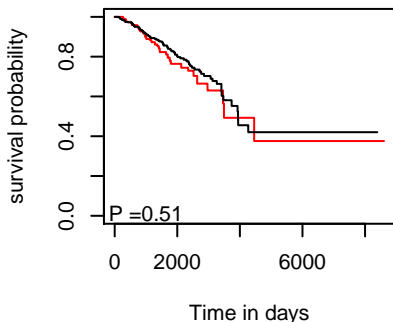**PFI hsa-mir-5680**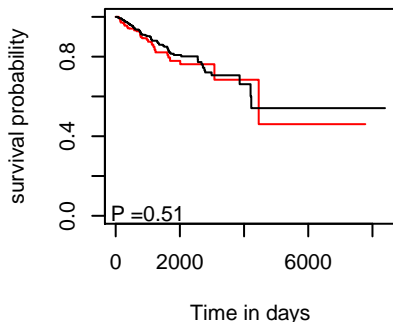**DFI hsa-mir-5680**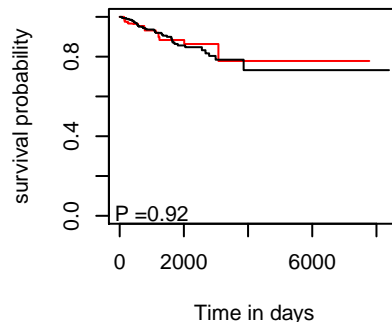**DSS hsa-mir-5680**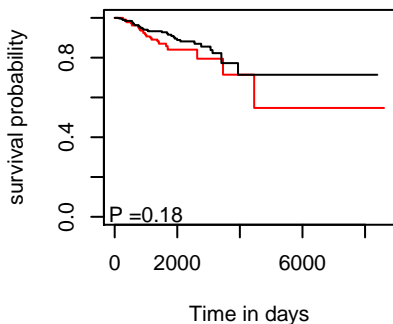**OS hsa-mir-139**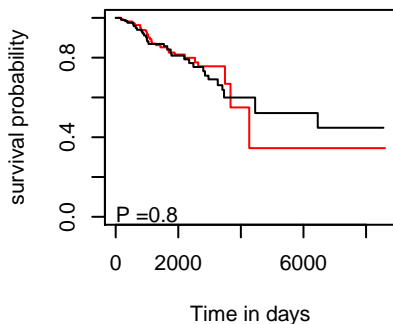**PFI hsa-mir-139**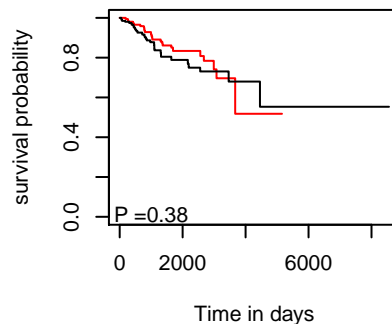**DFI hsa-mir-139**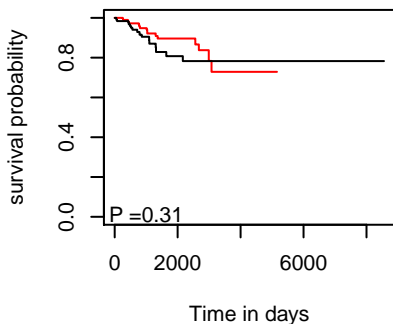**DSS hsa-mir-139**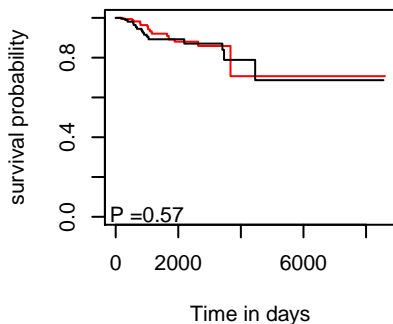**OS hsa-mir-196a-1**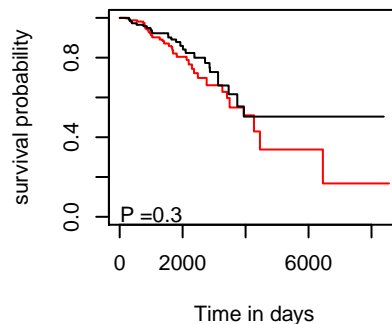

**PFI hsa-mir-196a-1**

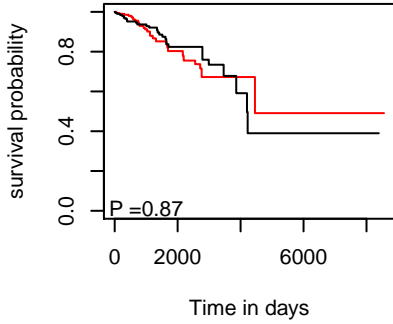

**DFI hsa-mir-196a-1**

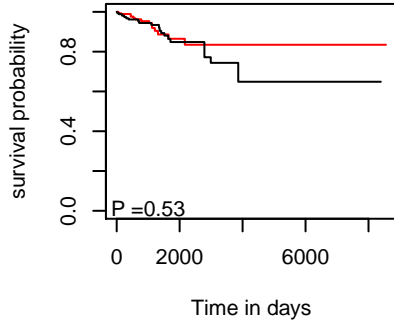

**DSS hsa-mir-196a-1**

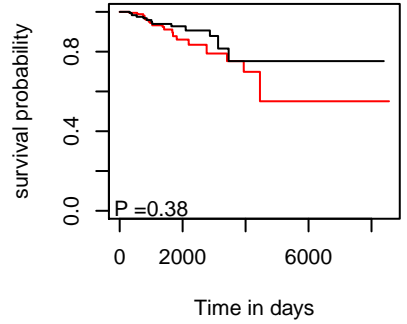

**OS hsa-mir-5579**

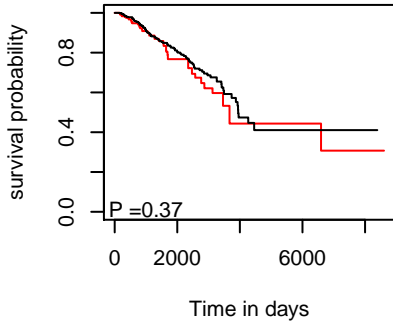

**PFI hsa-mir-5579**

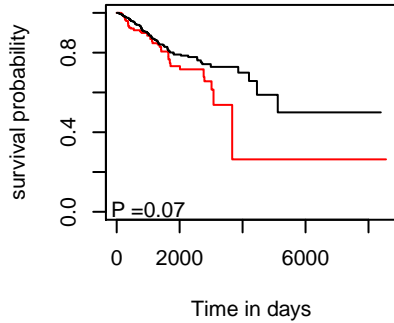

**DFI hsa-mir-5579**

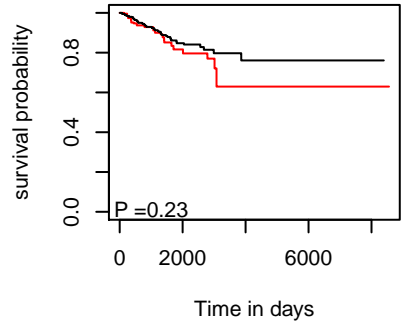

**DSS hsa-mir-5579**

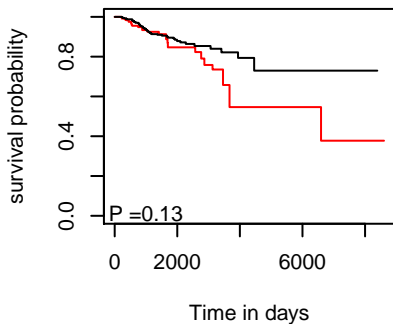

**OS hsa-mir-99a**

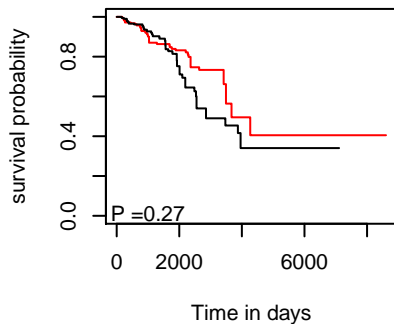

**PFI hsa-mir-99a**

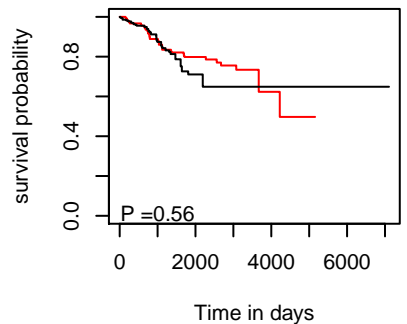

**DFI hsa-mir-99a**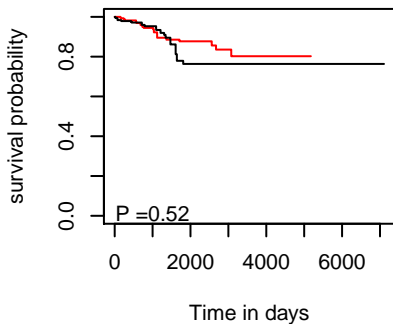**DSS hsa-mir-99a**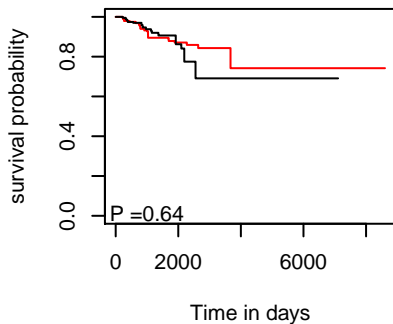**OS hsa-mir-30b**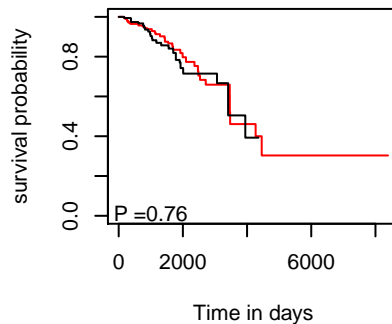**PFI hsa-mir-30b**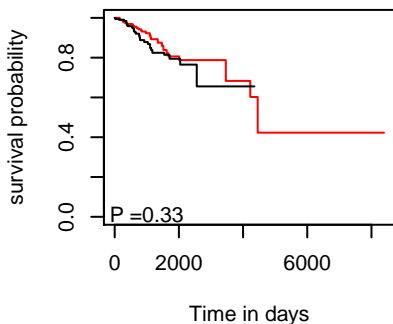**DFI hsa-mir-30b**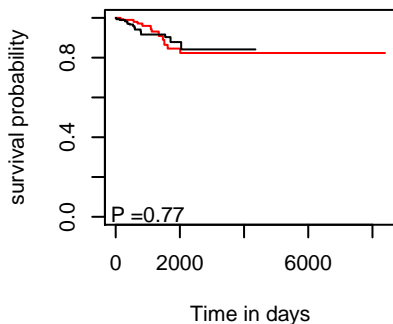**DSS hsa-mir-30b**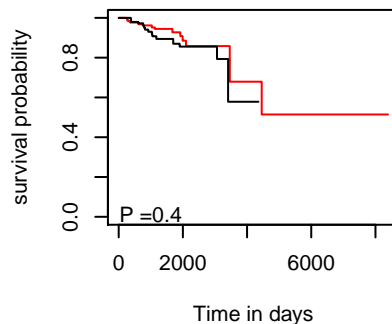**OS hsa-mir-4664**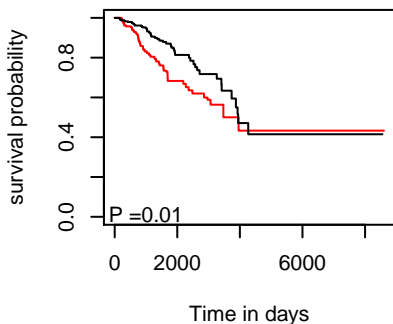**PFI hsa-mir-4664**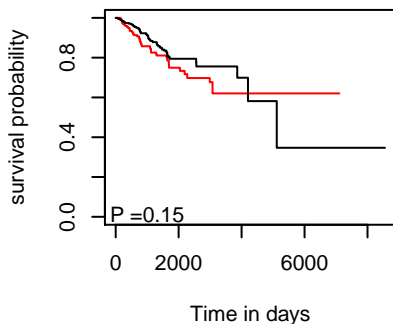**DFI hsa-mir-4664**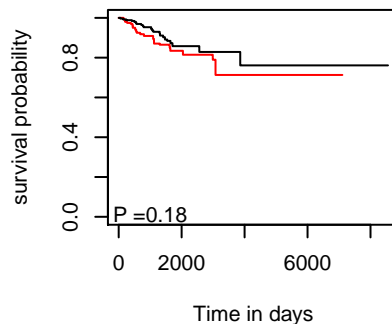

**DSS hsa-mir-4664**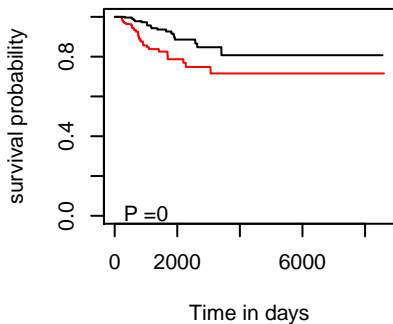**OS hsa-mir-3610**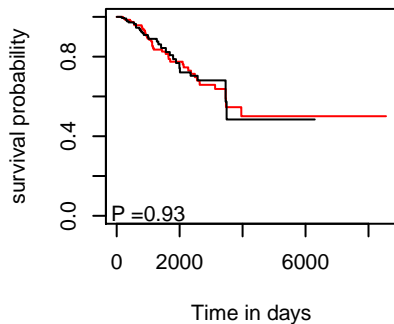**PFI hsa-mir-3610**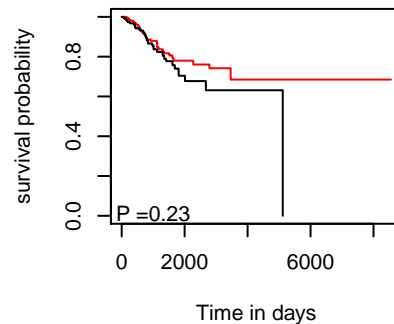**DFI hsa-mir-3610**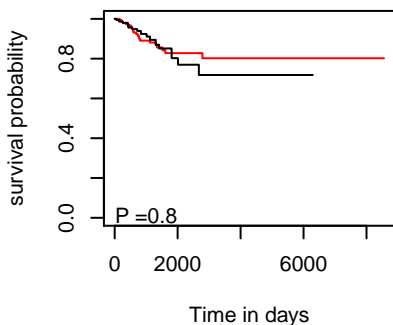**DSS hsa-mir-3610**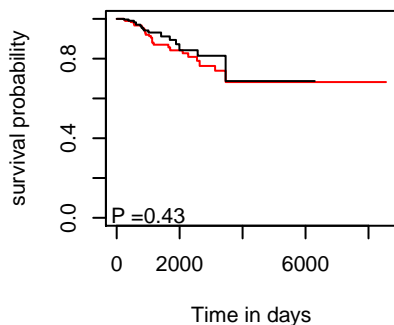**OS hsa-let-7c**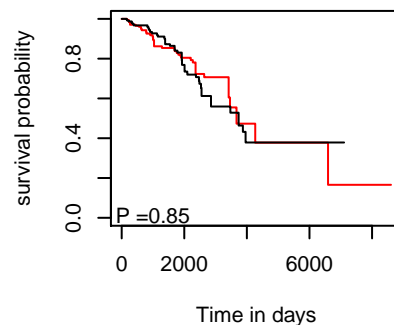**PFI hsa-let-7c**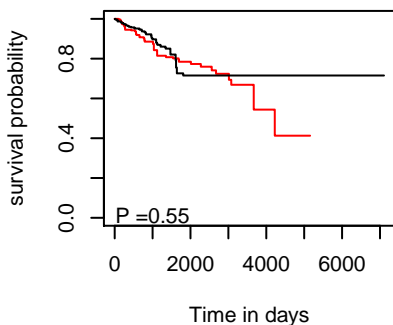**DFI hsa-let-7c**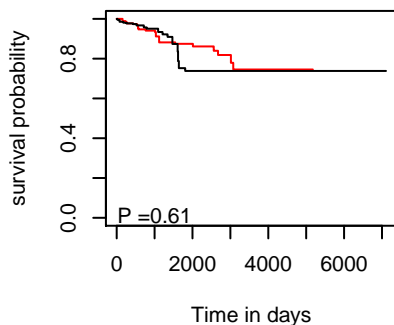**DSS hsa-let-7c**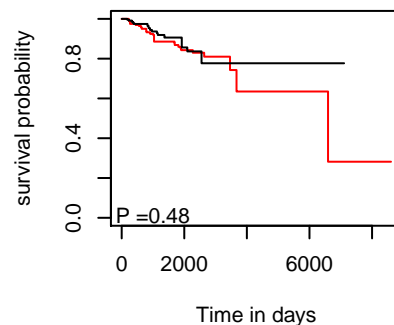

**OS hsa-mir-3664**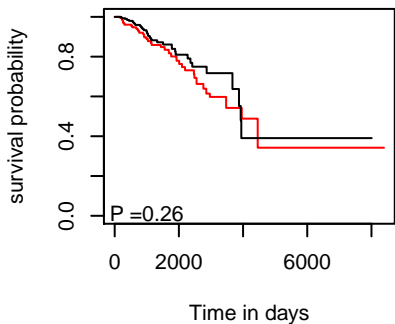**PFI hsa-mir-3664**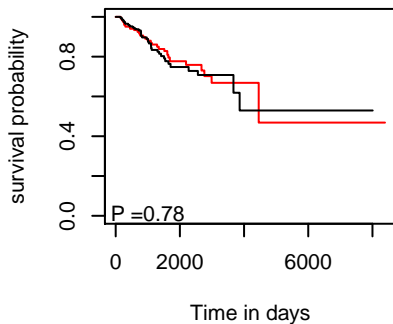**DFI hsa-mir-3664**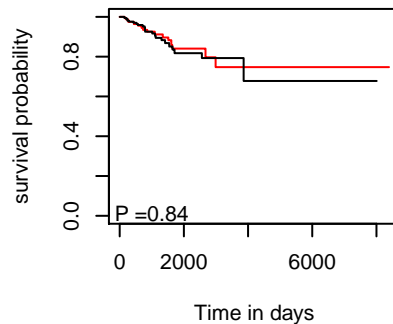**DSS hsa-mir-3664**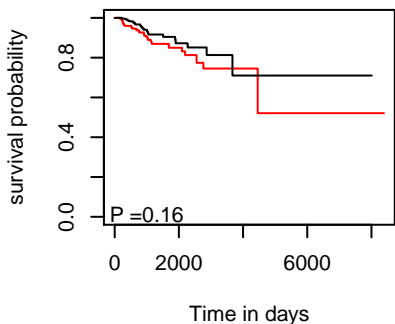**OS hsa-mir-548k**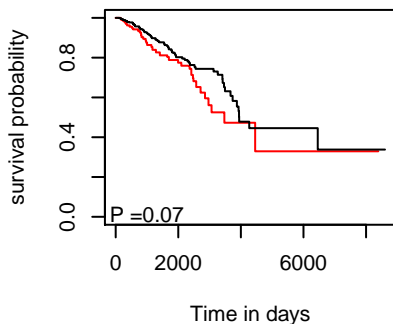**PFI hsa-mir-548k**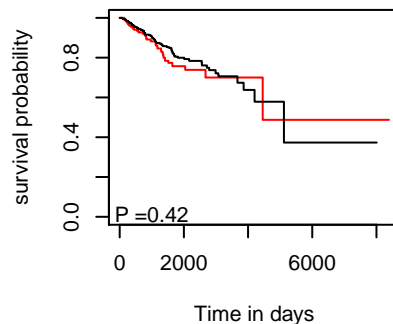**DFI hsa-mir-548k**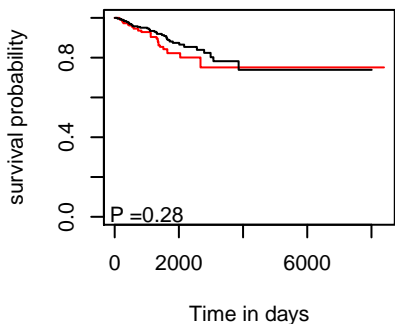**DSS hsa-mir-548k**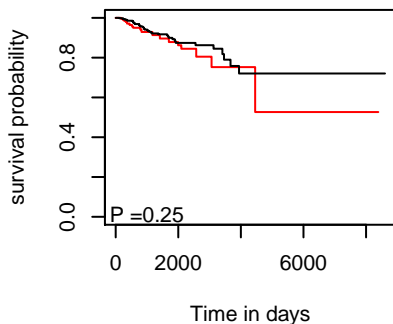**OS hsa-mir-708**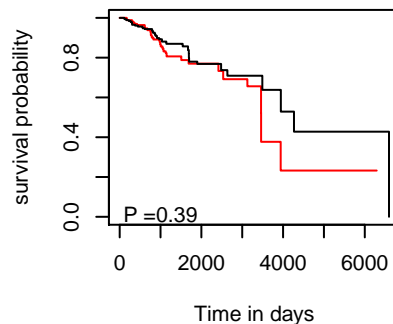

**PFI hsa-mir-708**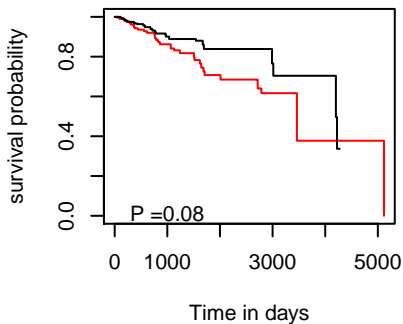**DFI hsa-mir-708**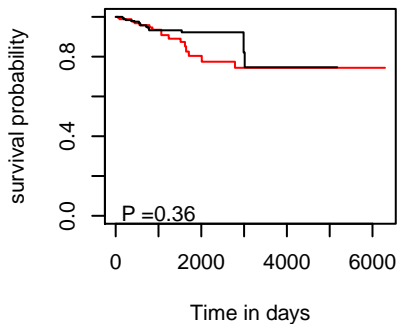**DSS hsa-mir-708**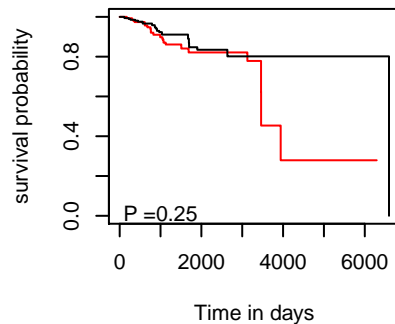**OS hsa-mir-4662a**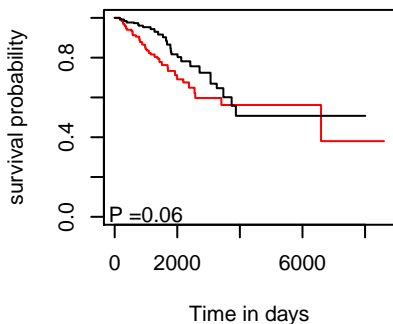**PFI hsa-mir-4662a**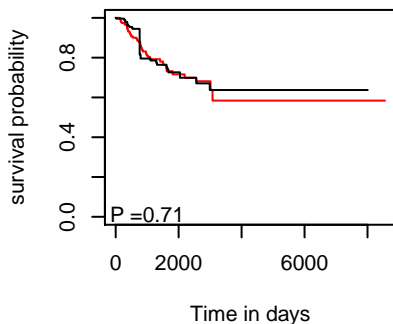**DFI hsa-mir-4662a**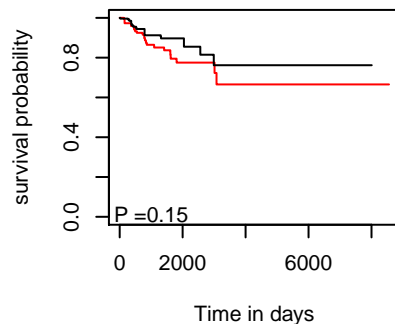**DSS hsa-mir-4662a**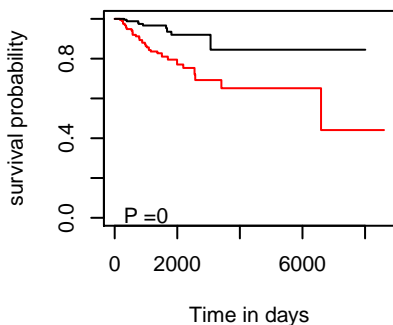**OS hsa-mir-937**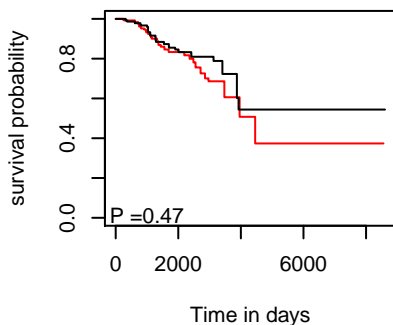**PFI hsa-mir-937**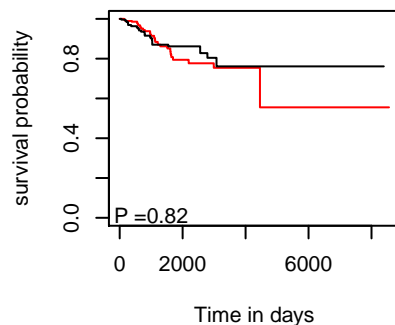

**DFI hsa-mir-937**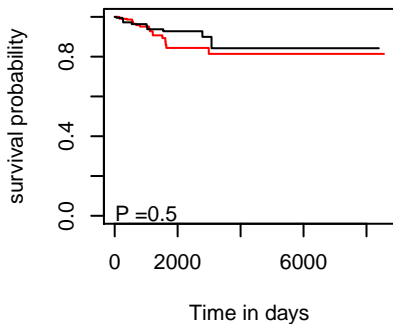**DSS hsa-mir-937**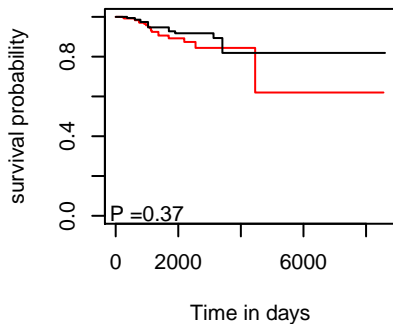**OS hsa-mir-6844**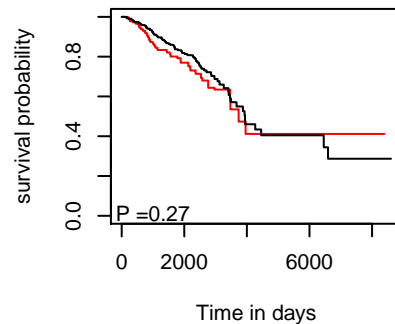**PFI hsa-mir-6844**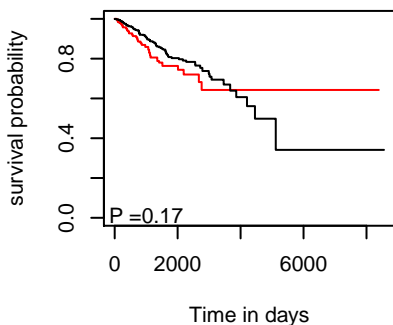**DFI hsa-mir-6844**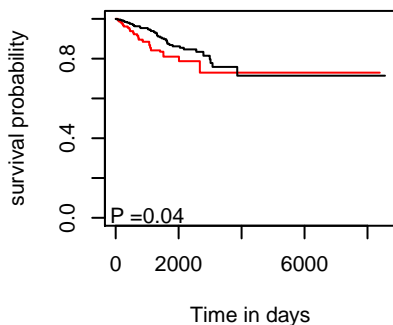**DSS hsa-mir-6844**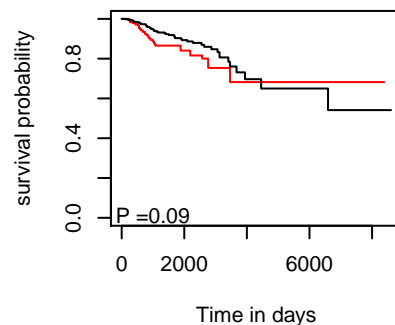**OS hsa-mir-192**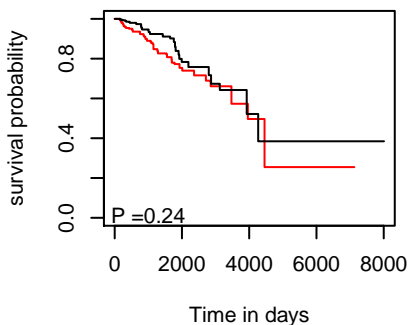**PFI hsa-mir-192**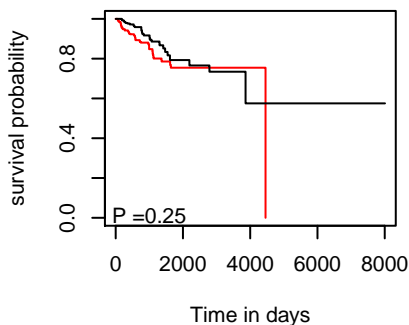**DFI hsa-mir-192**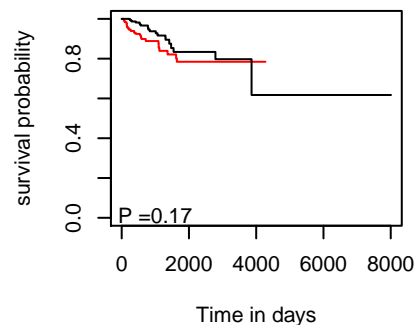

**DSS hsa-mir-192**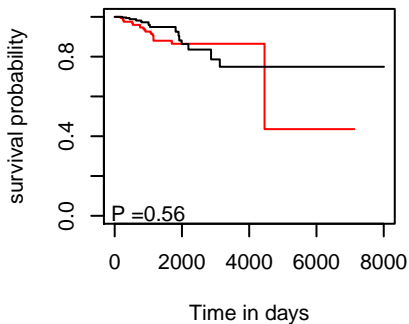**OS hsa-mir-7705**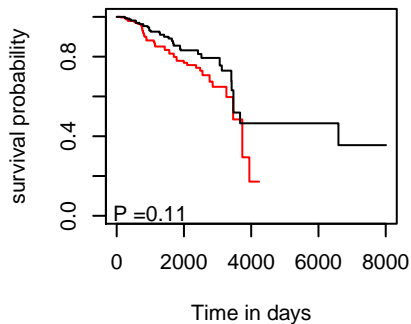**PFI hsa-mir-7705**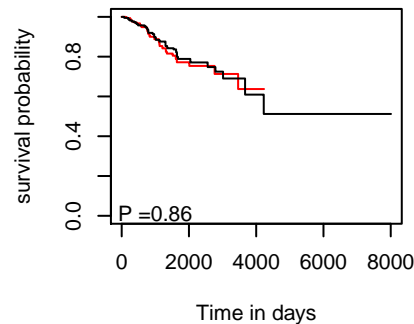**DFI hsa-mir-7705**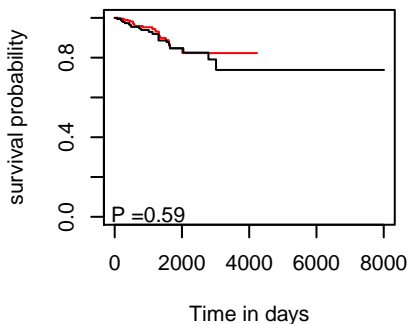**DSS hsa-mir-7705**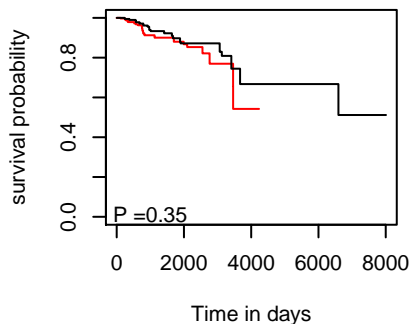**OS hsa-mir-4758**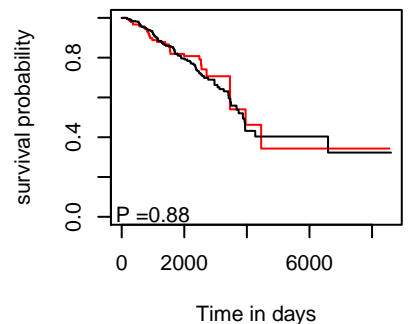**PFI hsa-mir-4758**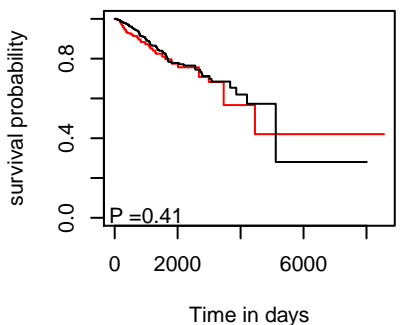**DFI hsa-mir-4758**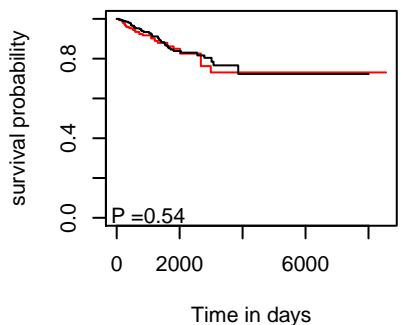**DSS hsa-mir-4758**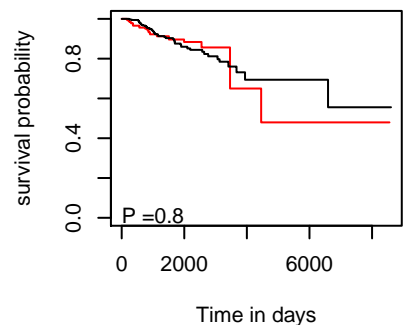

**OS hsa-mir-671**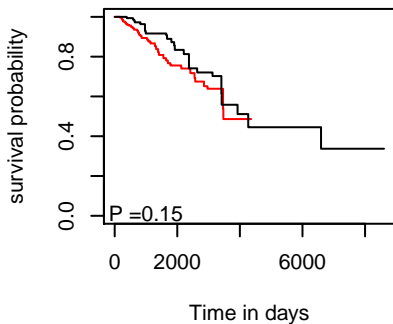**PFI hsa-mir-671**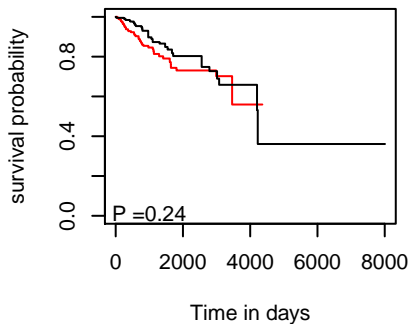**DFI hsa-mir-671**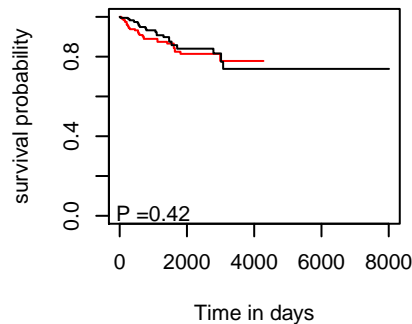**DSS hsa-mir-671**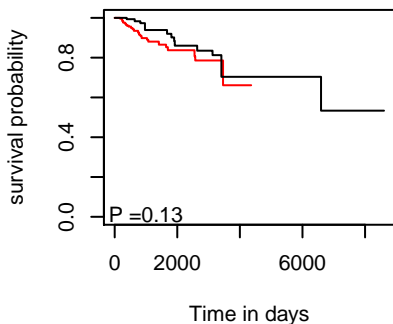**OS hsa-mir-30d**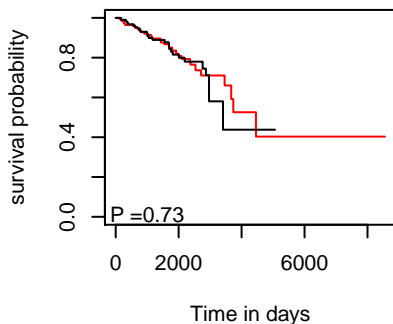**PFI hsa-mir-30d**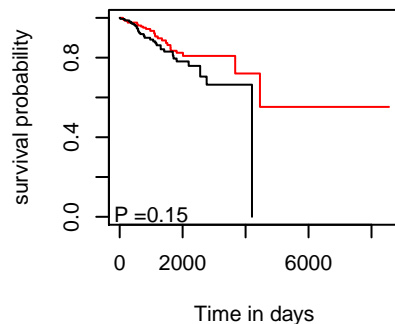**DFI hsa-mir-30d**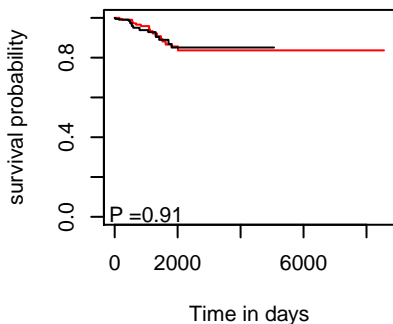**DSS hsa-mir-30d**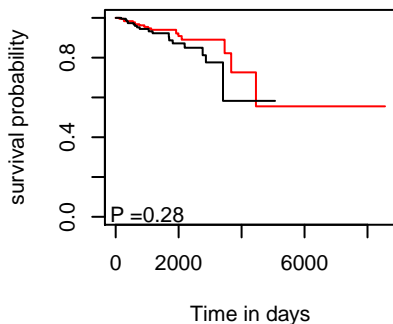**OS hsa-mir-675**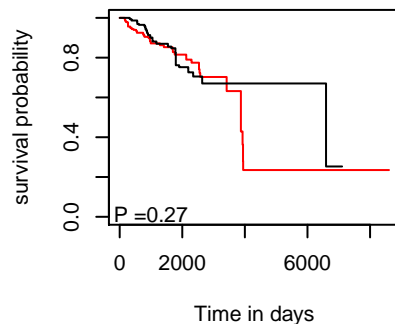

**PFI hsa-mir-675**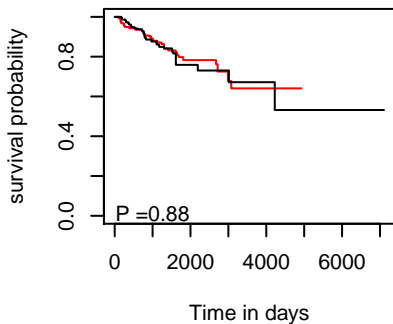**DFI hsa-mir-675**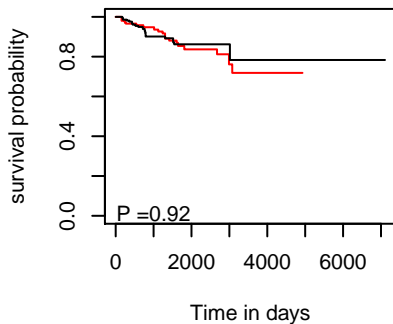**DSS hsa-mir-675**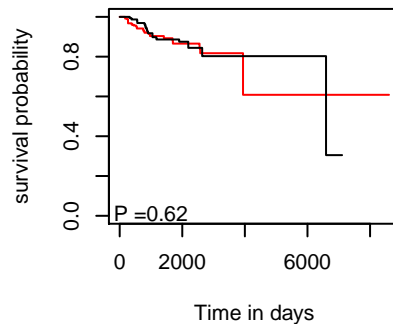**OS hsa-mir-6514**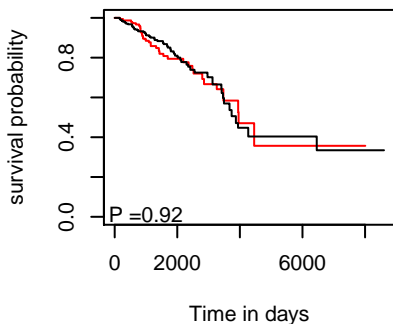**PFI hsa-mir-6514**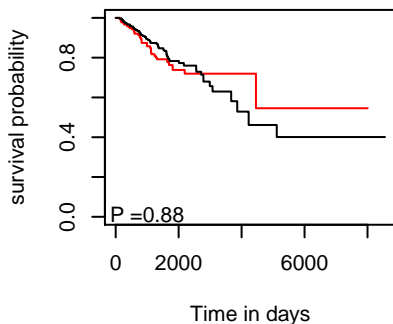**DFI hsa-mir-6514**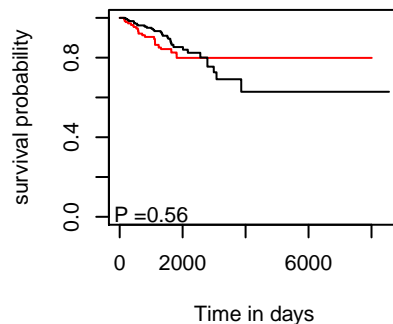**DSS hsa-mir-6514**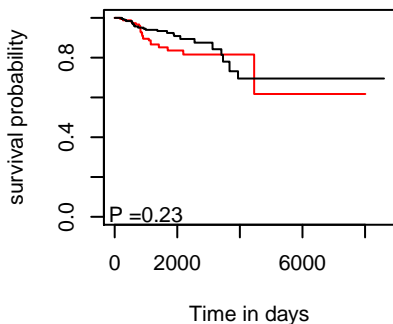**OS hsa-mir-6748**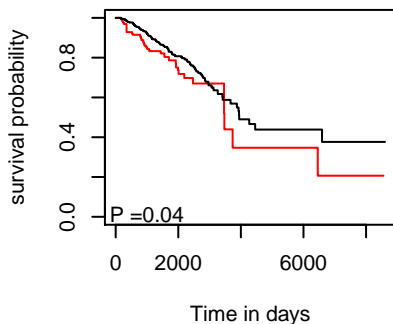**PFI hsa-mir-6748**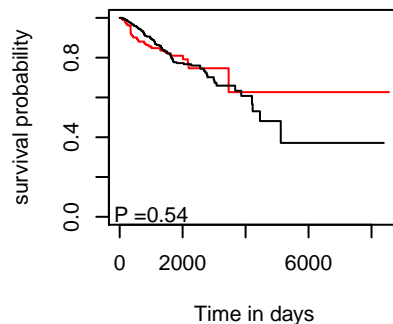

**DFI hsa-mir-6748**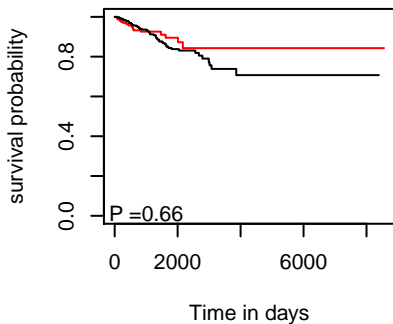**DSS hsa-mir-6748**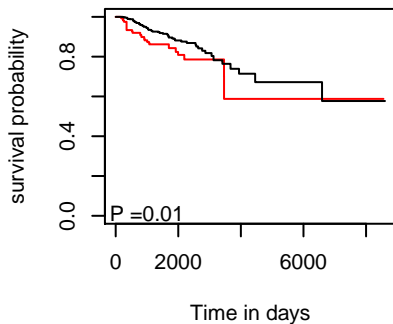**OS hsa-mir-3150a**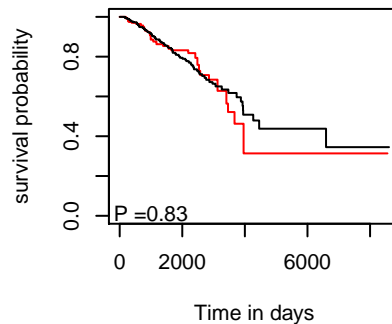**PFI hsa-mir-3150a**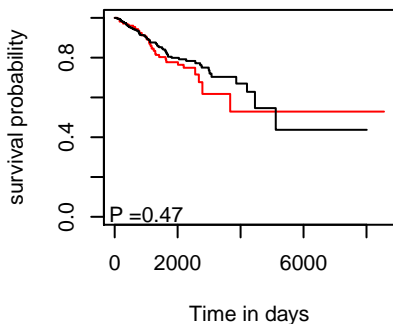**DFI hsa-mir-3150a**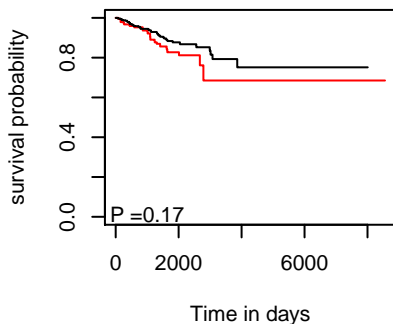**DSS hsa-mir-3150a**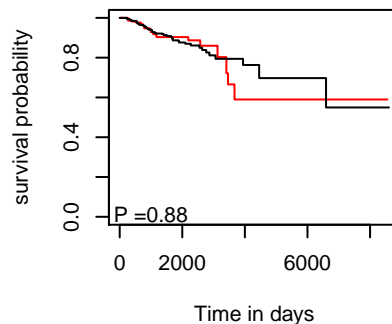**OS hsa-mir-10a**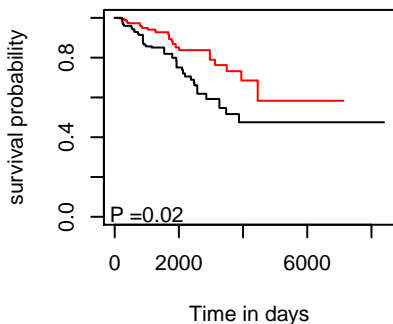**PFI hsa-mir-10a**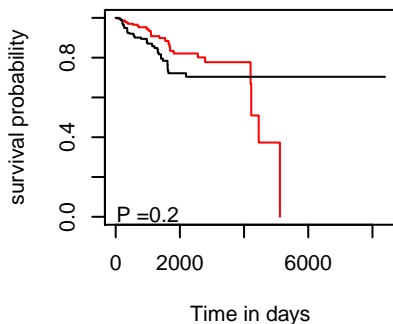**DFI hsa-mir-10a**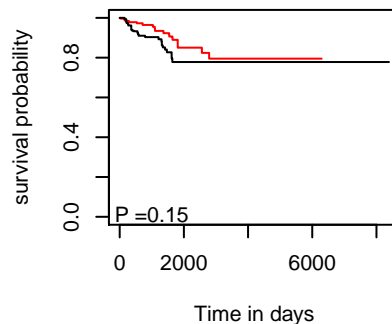

**DSS hsa-mir-10a**

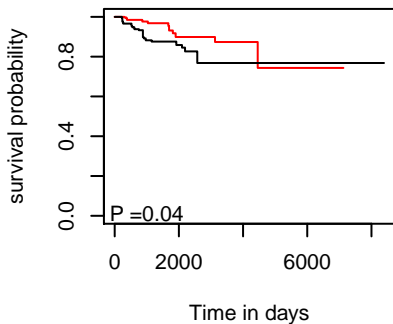

**OS hsa-mir-6879**

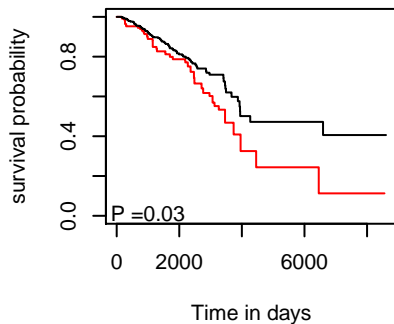

**PFI hsa-mir-6879**

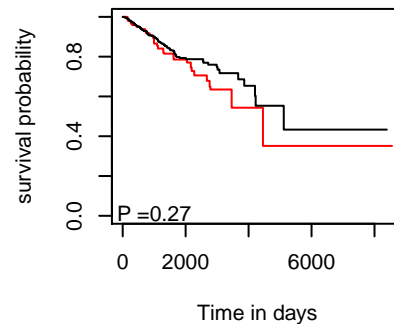

**DFI hsa-mir-6879**

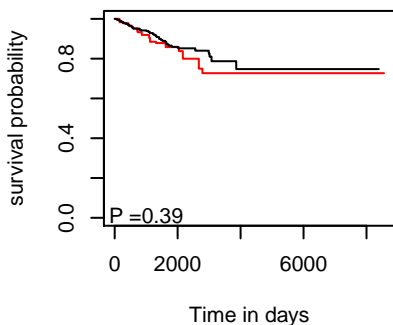

**DSS hsa-mir-6879**

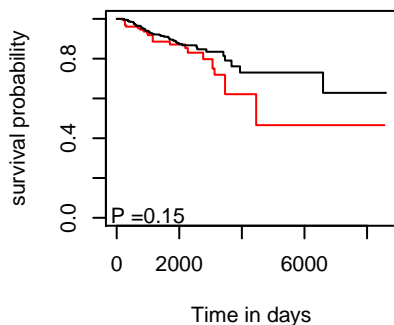

**OS hsa-mir-4453**

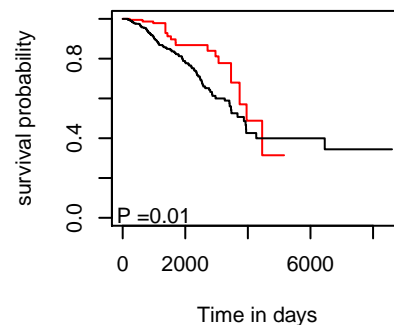

**PFI hsa-mir-4453**

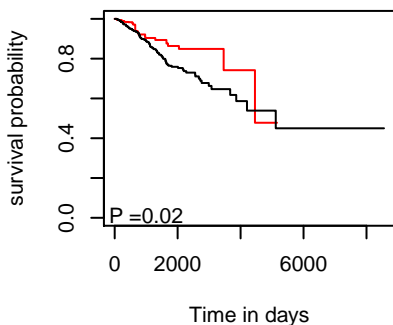

**DFI hsa-mir-4453**

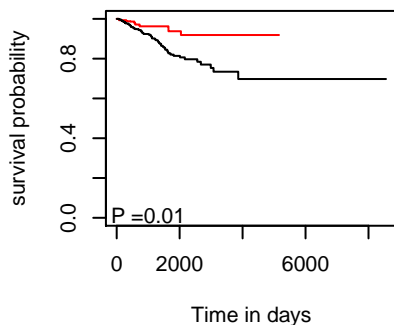

**DSS hsa-mir-4453**

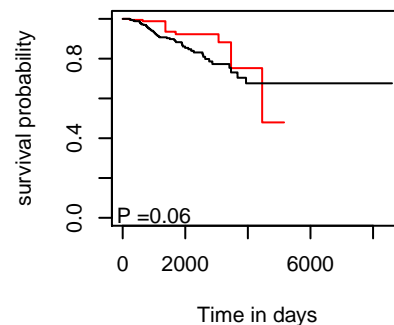

**OS hsa-mir-210**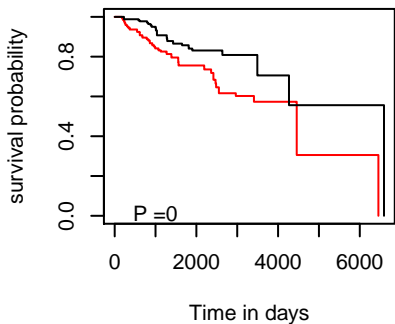**PFI hsa-mir-210**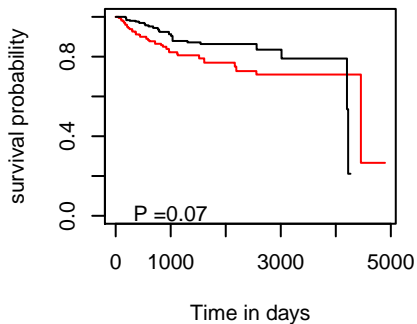**DFI hsa-mir-210**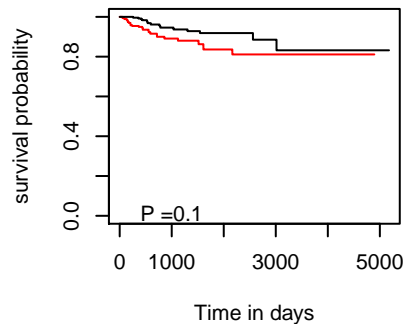**DSS hsa-mir-210**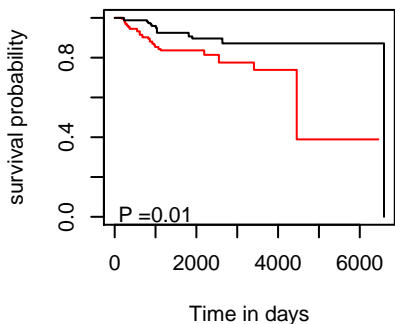**OS hsa-mir-5691**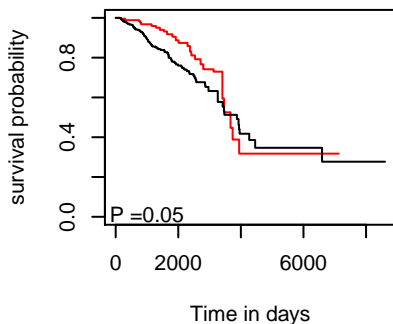**PFI hsa-mir-5691**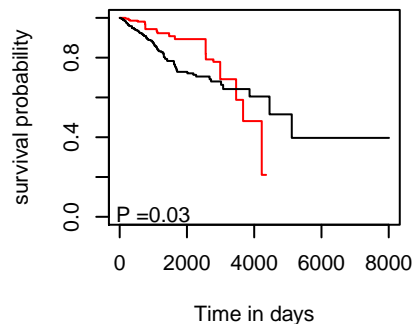**DFI hsa-mir-5691**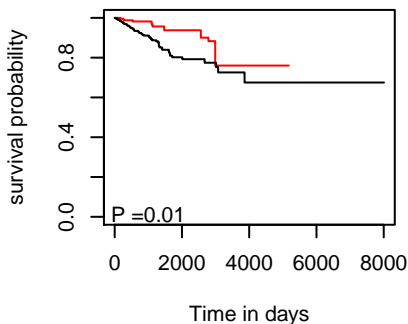**DSS hsa-mir-5691**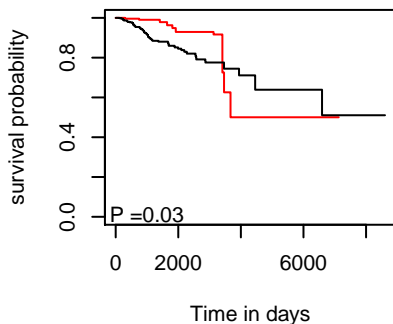**OS hsa-mir-6747**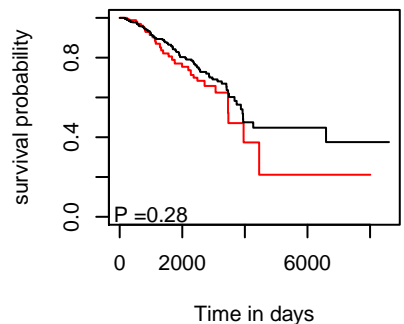

**PFI hsa-mir-6747**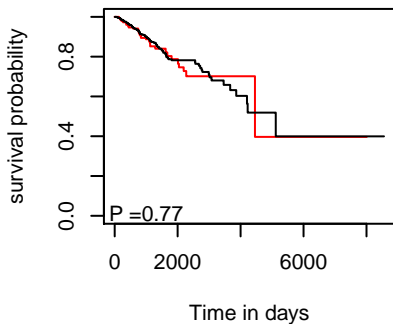**DFI hsa-mir-6747**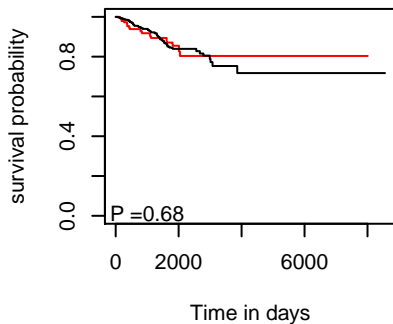**DSS hsa-mir-6747**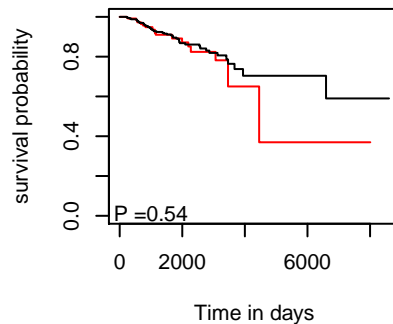**OS hsa-mir-7155**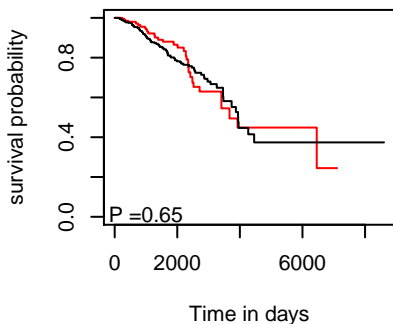**PFI hsa-mir-7155**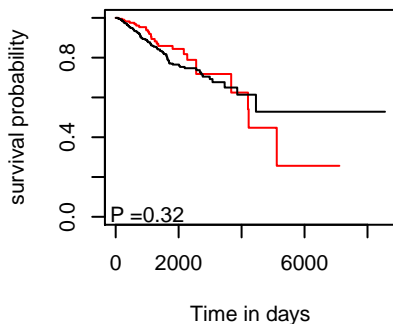**DFI hsa-mir-7155**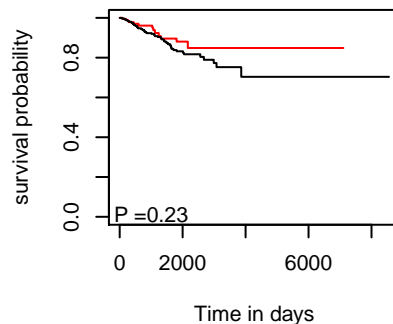**DSS hsa-mir-7155**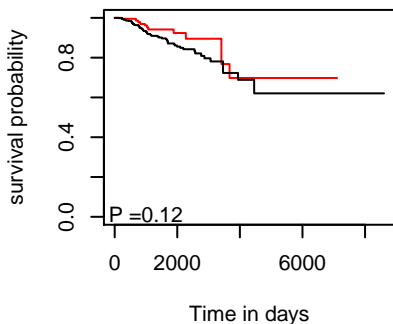**OS hsa-mir-3687**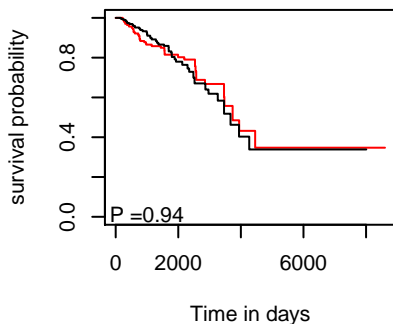**PFI hsa-mir-3687**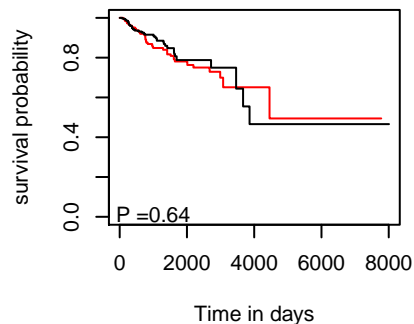

**DFI hsa-mir-3687**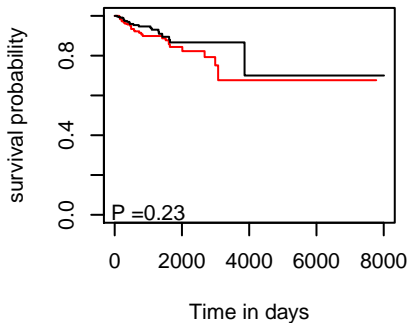**DSS hsa-mir-3687**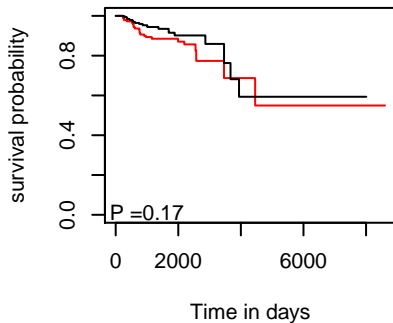**OS hsa-mir-151a**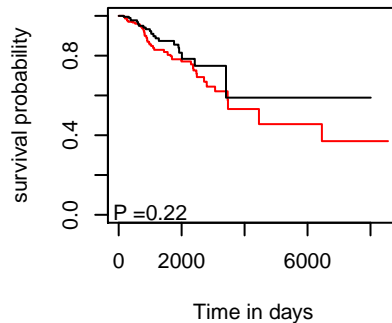**PFI hsa-mir-151a**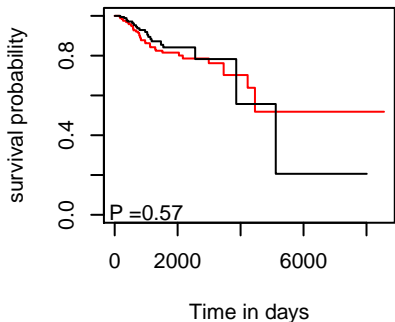**DFI hsa-mir-151a**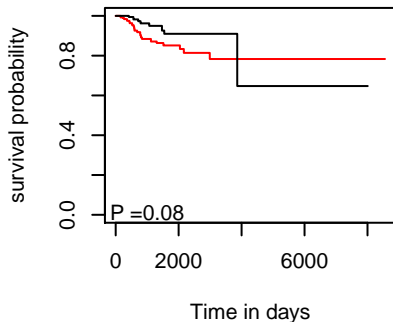**DSS hsa-mir-151a**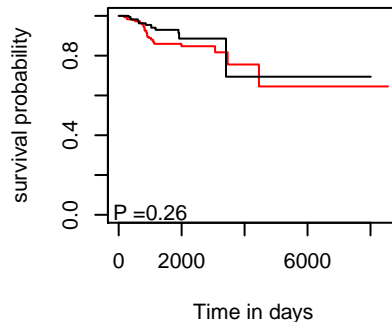**OS hsa-mir-3136**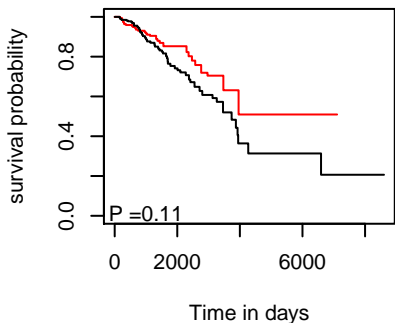**PFI hsa-mir-3136**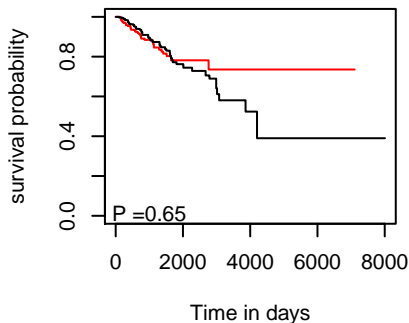**DFI hsa-mir-3136**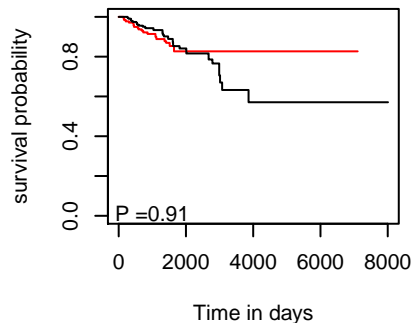

DSS hsa-mir-3136

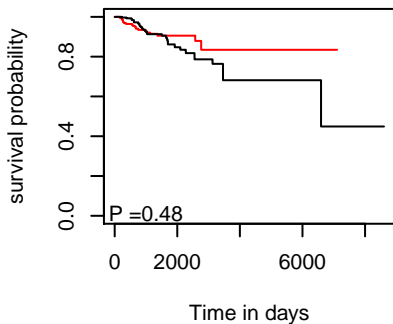

OS hsa-mir-548t

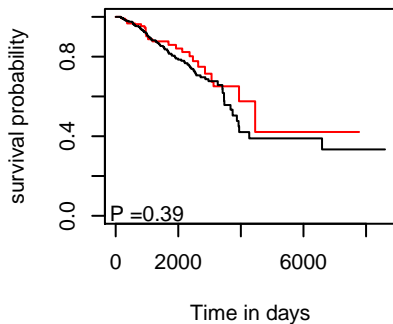

PFI hsa-mir-548t

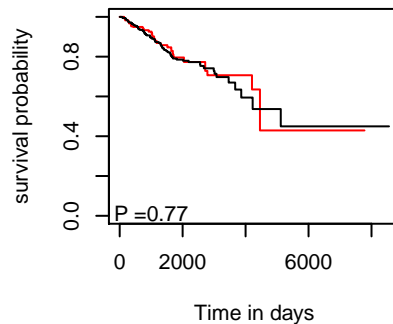

DFI hsa-mir-548t

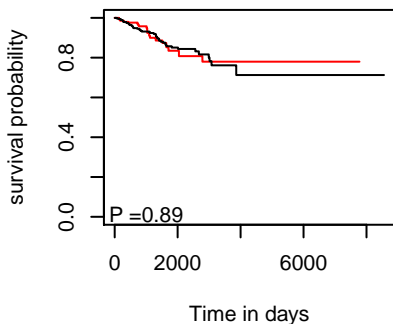

DSS hsa-mir-548t

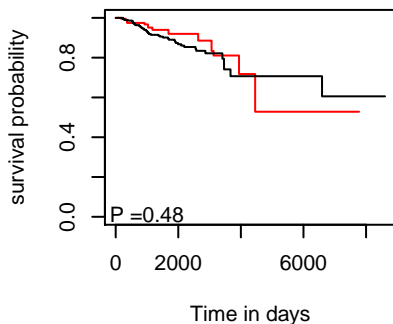

OS hsa-mir-8072

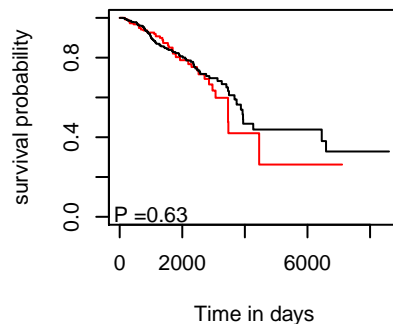

PFI hsa-mir-8072

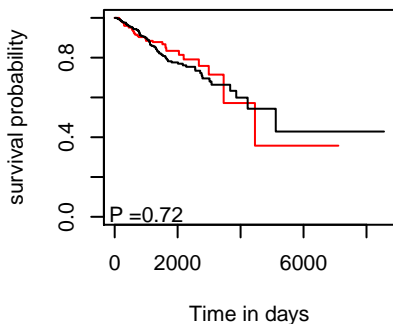

DFI hsa-mir-8072

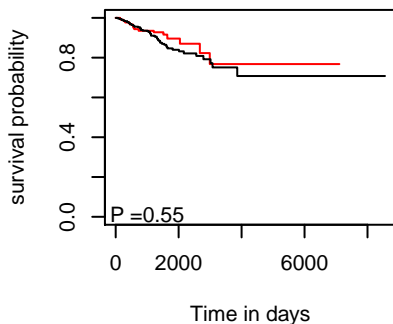

DSS hsa-mir-8072

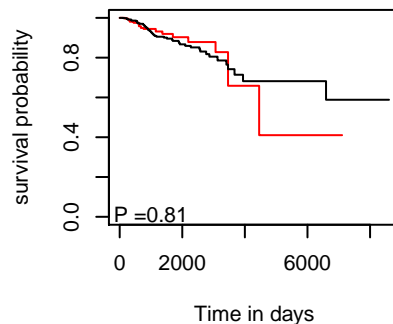

**OS hsa-mir-4443**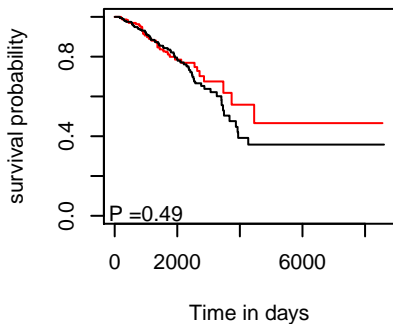**PFI hsa-mir-4443**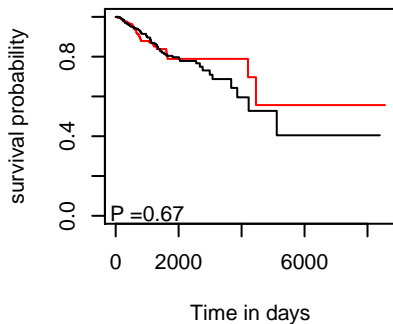**DFI hsa-mir-4443**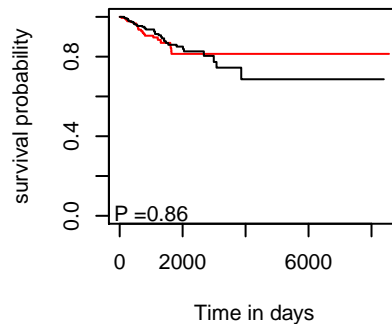**DSS hsa-mir-4443**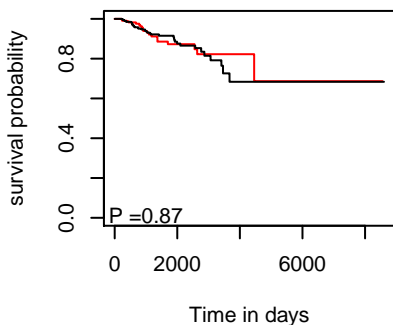**OS hsa-mir-4787**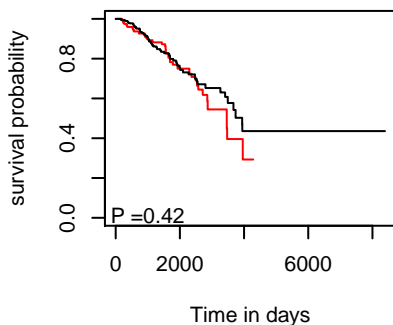**PFI hsa-mir-4787**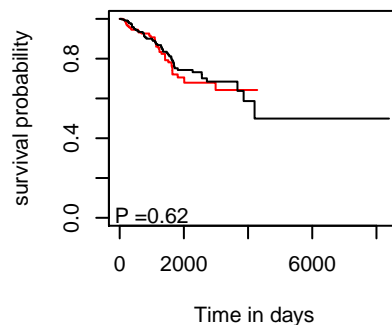**DFI hsa-mir-4787**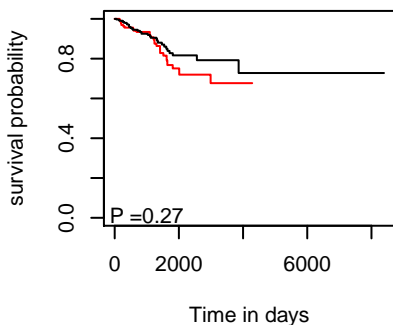**DSS hsa-mir-4787**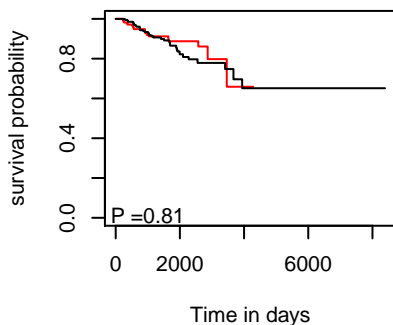**OS hsa-mir-516a-2**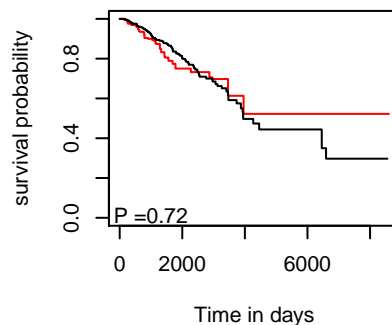

**PFI hsa-mir-516a-2**

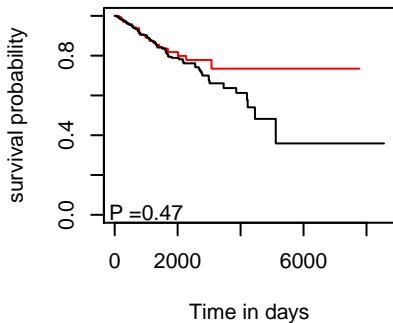

**DFI hsa-mir-516a-2**

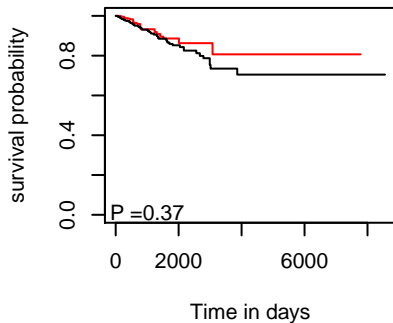

**DSS hsa-mir-516a-2**

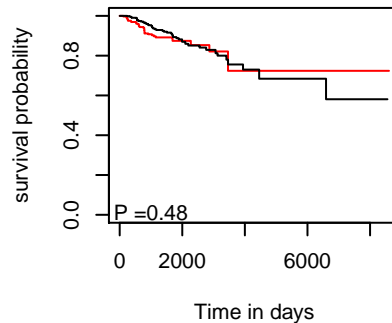

**OS hsa-mir-522**

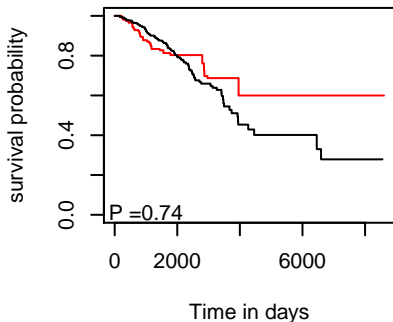

**PFI hsa-mir-522**

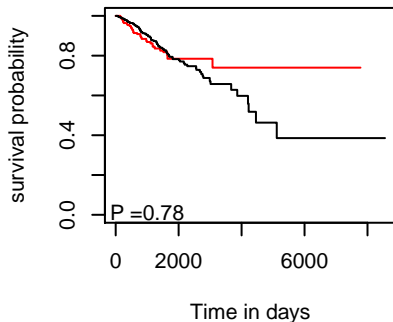

**DFI hsa-mir-522**

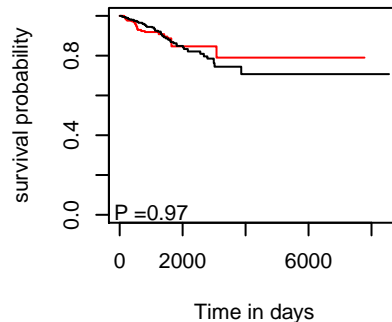

**DSS hsa-mir-522**

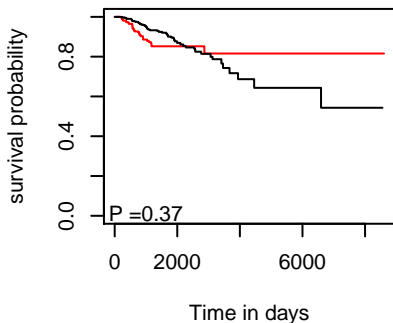

**OS hsa-mir-526b**

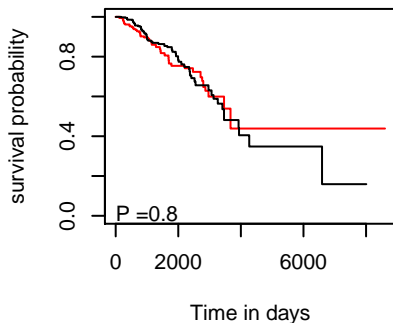

**PFI hsa-mir-526b**

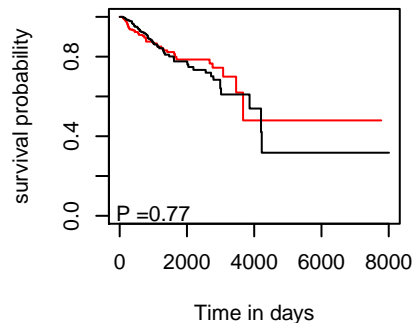



**DSS hsa-mir-135a-1**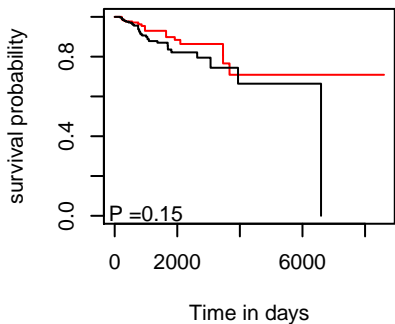**OS hsa-mir-425**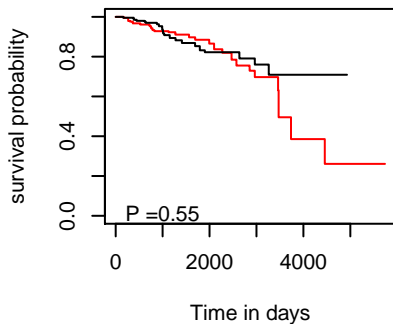**PFI hsa-mir-425**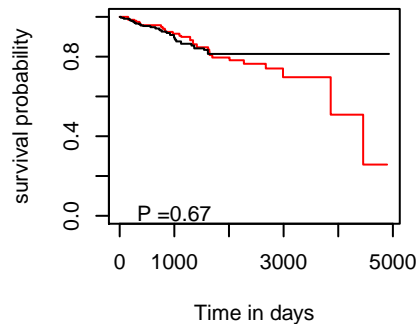**DFI hsa-mir-425**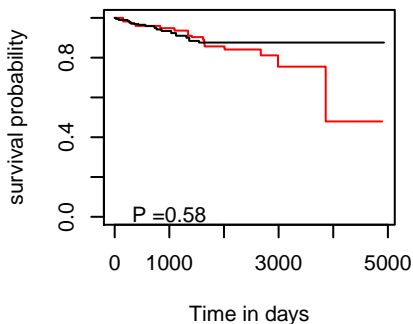**DSS hsa-mir-425**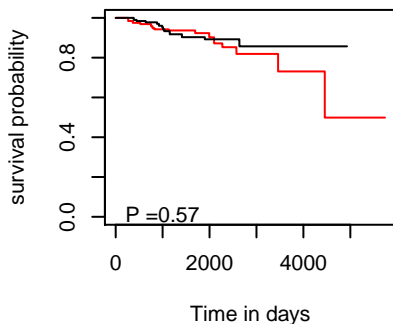**OS hsa-mir-138-1**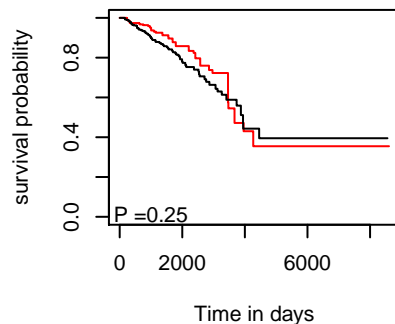**PFI hsa-mir-138-1**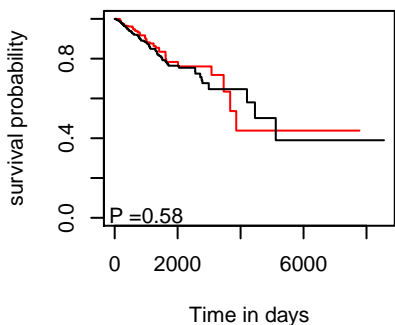**DFI hsa-mir-138-1**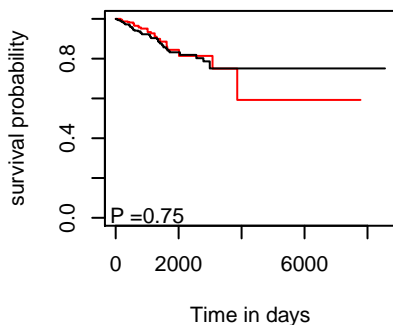**DSS hsa-mir-138-1**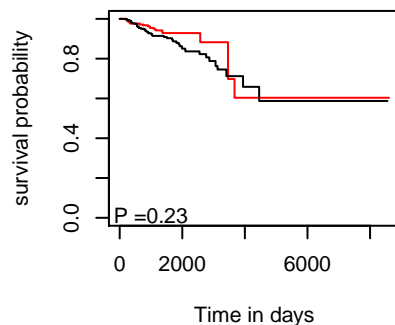

**OS hsa-mir-7-3**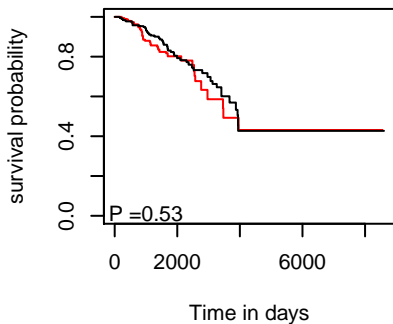**PFI hsa-mir-7-3**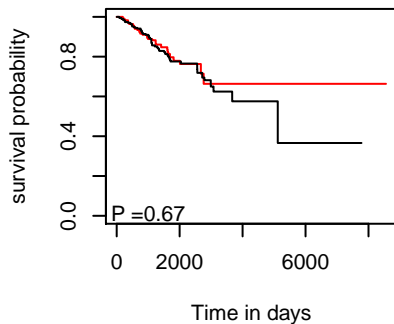**DFI hsa-mir-7-3**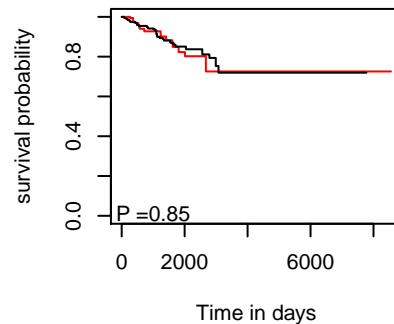**DSS hsa-mir-7-3**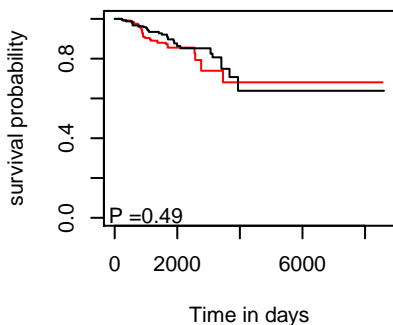**OS hsa-mir-2115**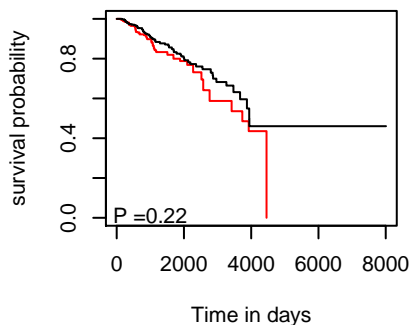**PFI hsa-mir-2115**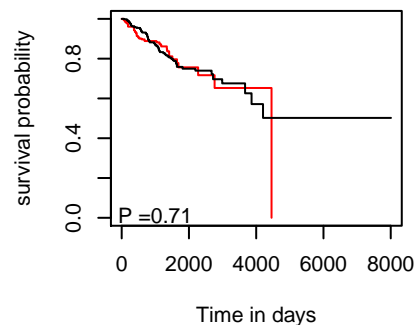**DFI hsa-mir-2115**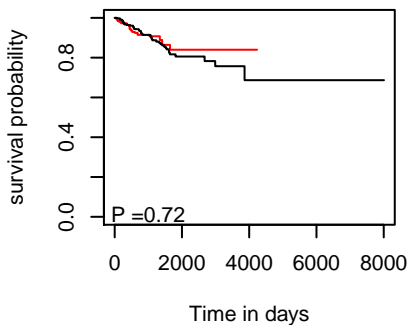**DSS hsa-mir-2115**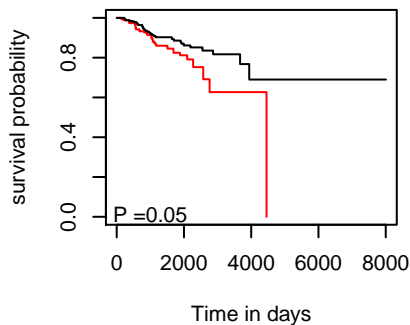**OS hsa-mir-203b**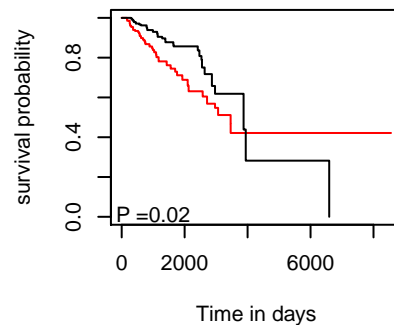

**PFI hsa-mir-203b**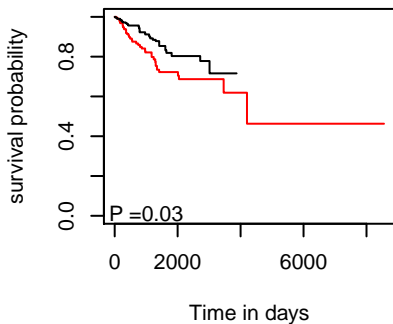**DFI hsa-mir-203b**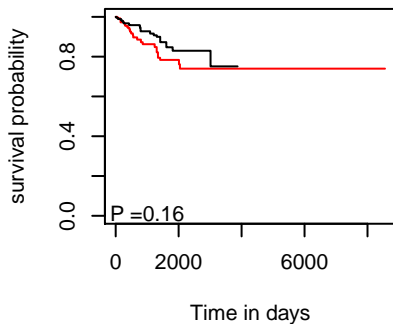**DSS hsa-mir-203b**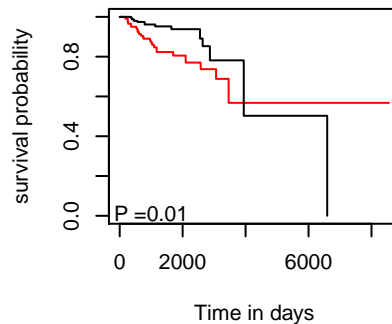**OS hsa-mir-3173**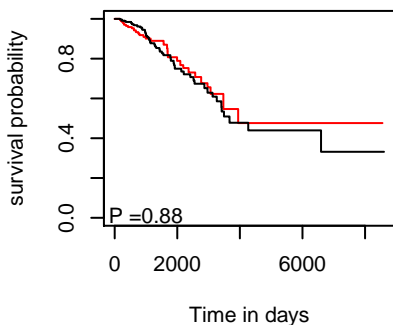**PFI hsa-mir-3173**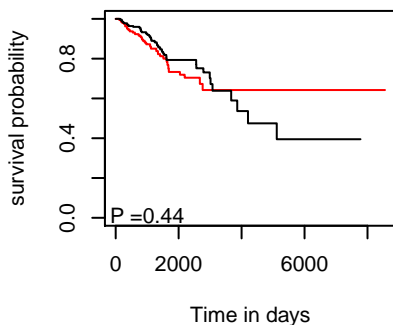**DFI hsa-mir-3173**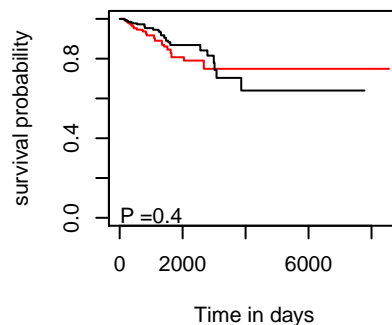**DSS hsa-mir-3173**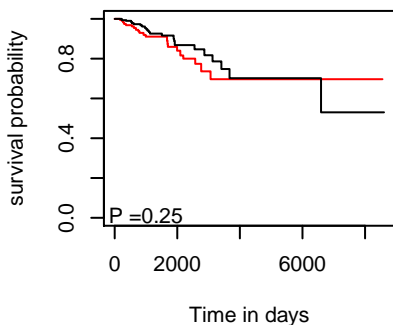**OS hsa-mir-345**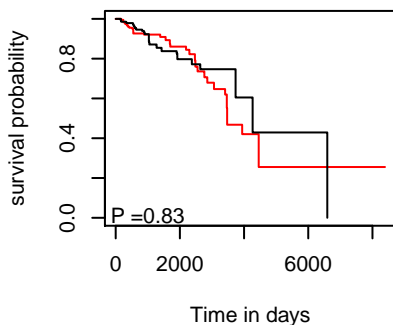**PFI hsa-mir-345**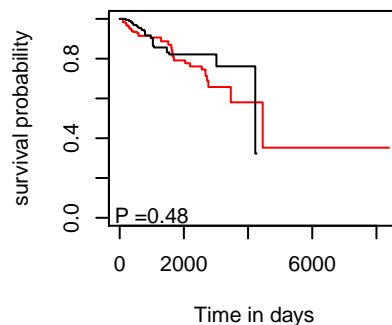

**DFI hsa-mir-345**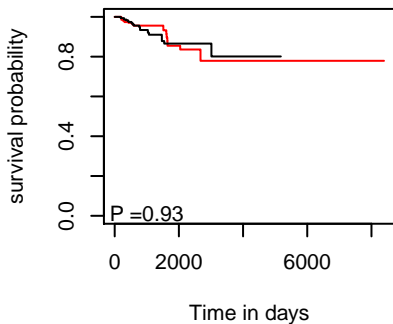**DSS hsa-mir-345**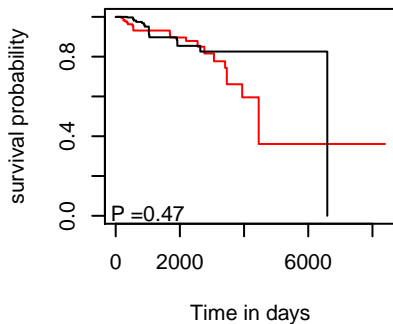**OS hsa-mir-299**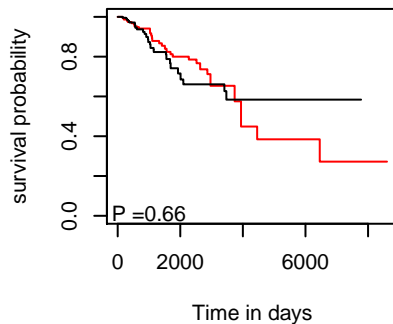**PFI hsa-mir-299**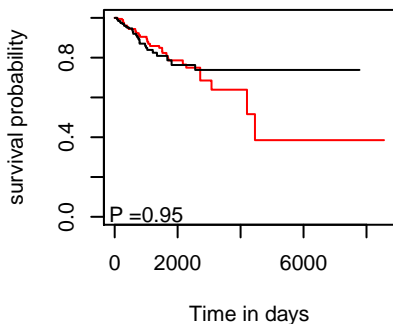**DFI hsa-mir-299**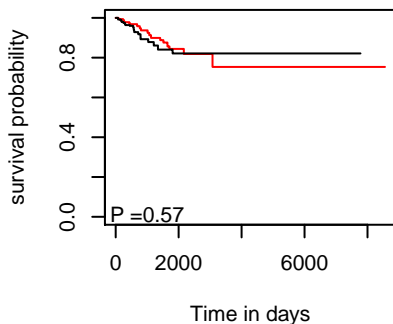**DSS hsa-mir-299**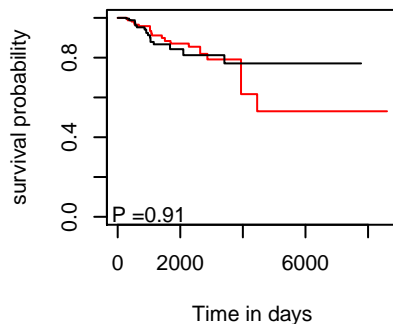**OS hsa-mir-381**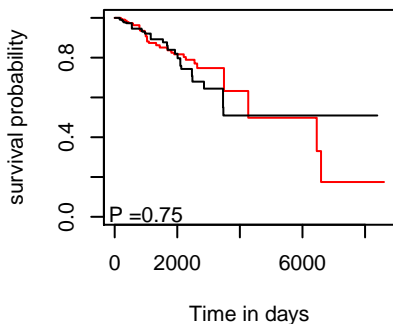**PFI hsa-mir-381**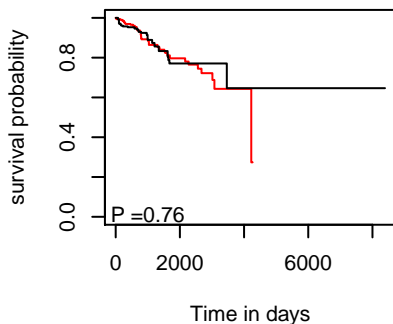**DFI hsa-mir-381**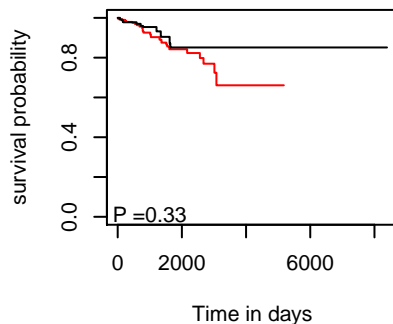

**DSS hsa-mir-381**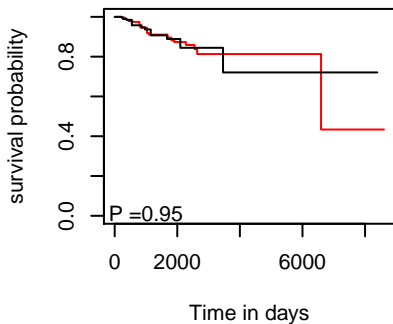**OS hsa-mir-383**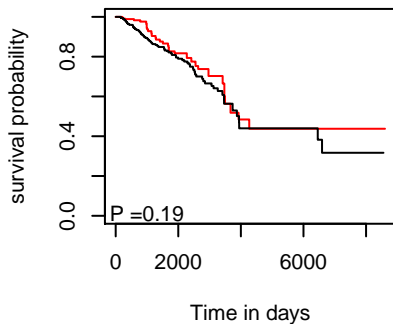**PFI hsa-mir-383**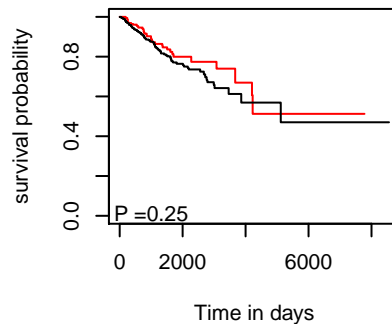**DFI hsa-mir-383**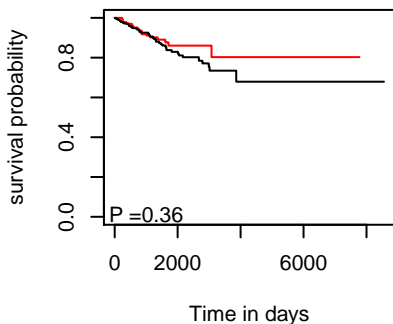**DSS hsa-mir-383**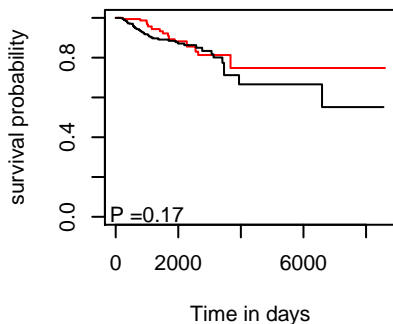**OS hsa-mir-151b**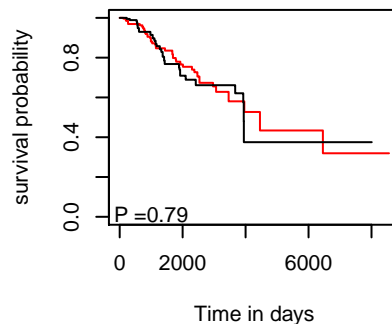**PFI hsa-mir-151b**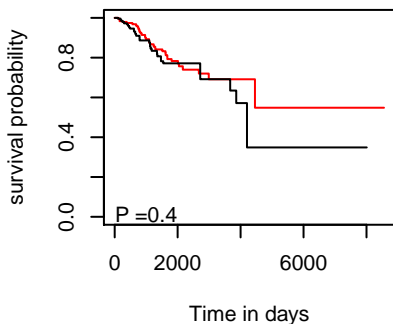**DFI hsa-mir-151b**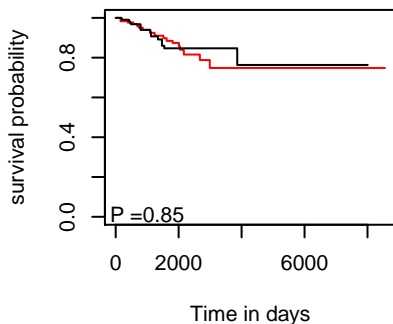**DSS hsa-mir-151b**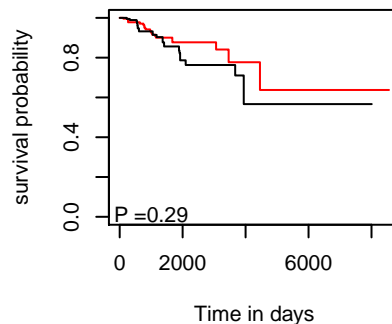

**OS hsa-mir-337**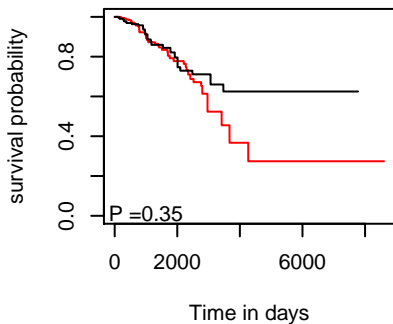**PFI hsa-mir-337**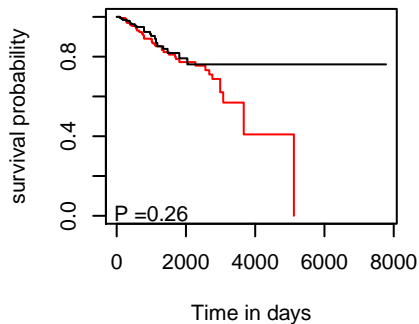**DFI hsa-mir-337**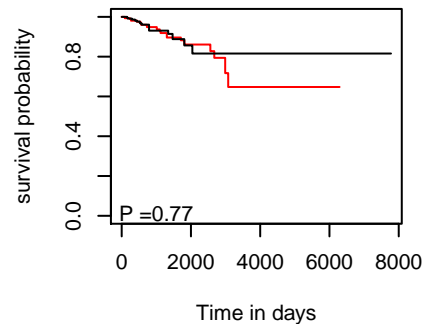**DSS hsa-mir-337**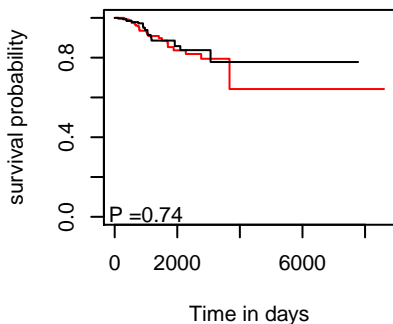**OS hsa-mir-342**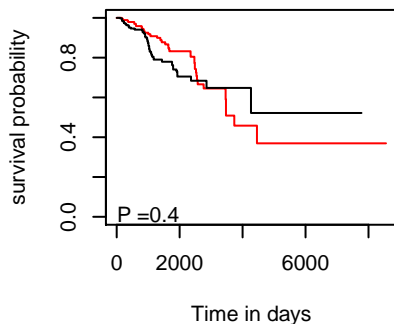**PFI hsa-mir-342**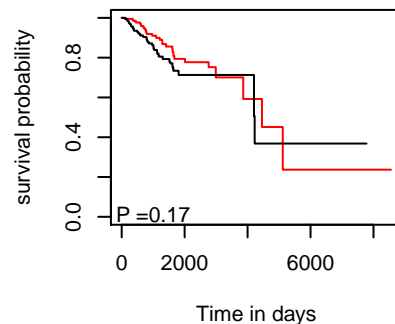**DFI hsa-mir-342**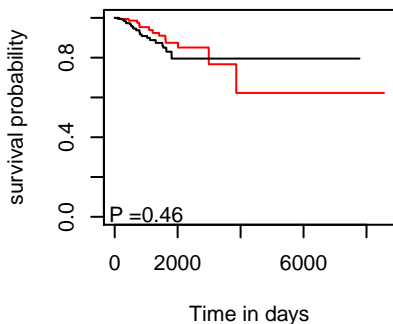**DSS hsa-mir-342**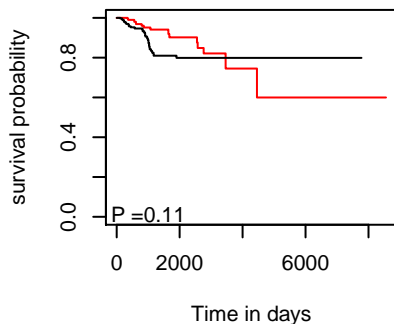**OS hsa-mir-376c**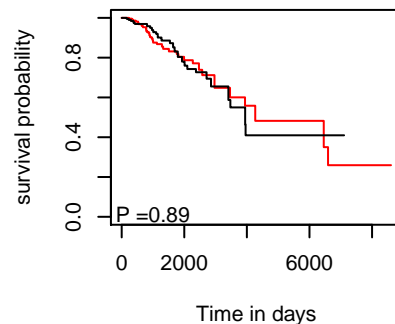



**DFI hsa-mir-654**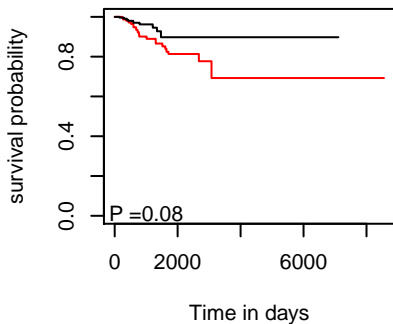**DSS hsa-mir-654**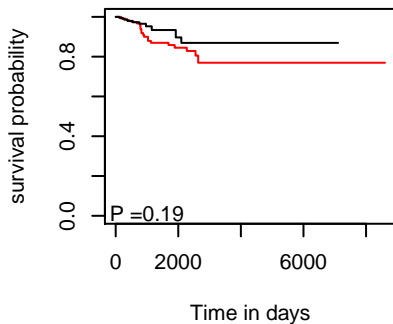**OS hsa-mir-191**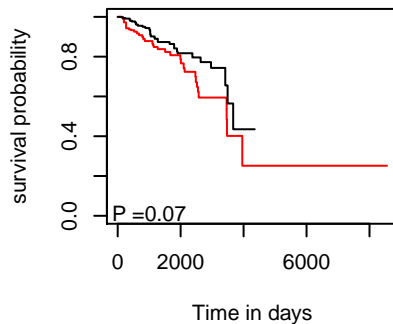**PFI hsa-mir-191**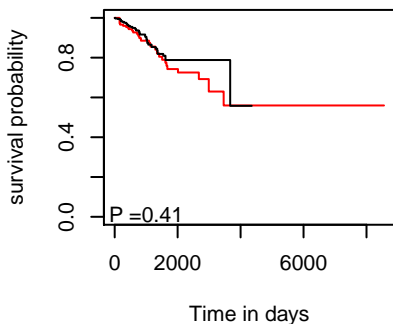**DFI hsa-mir-191**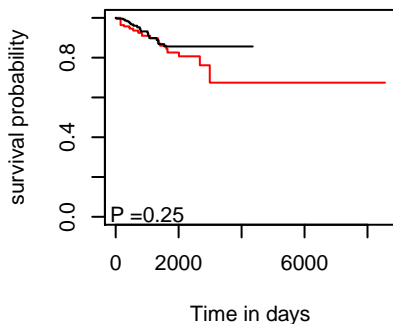**DSS hsa-mir-191**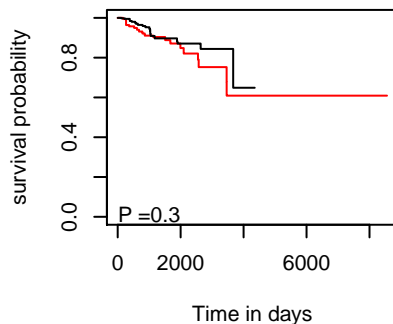**OS hsa-mir-4510**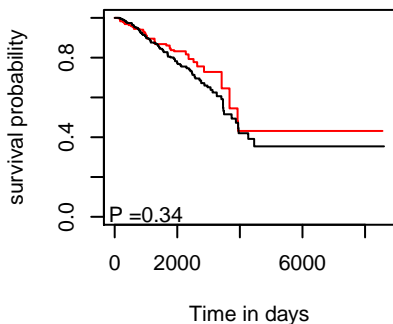**PFI hsa-mir-4510**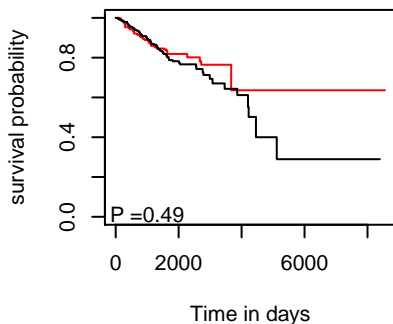**DFI hsa-mir-4510**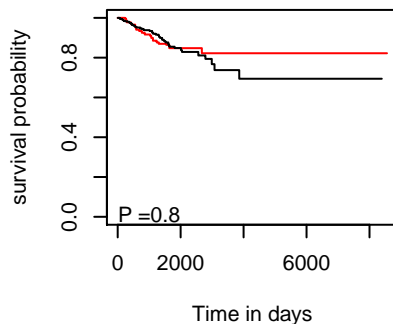

**DSS hsa-mir-4510**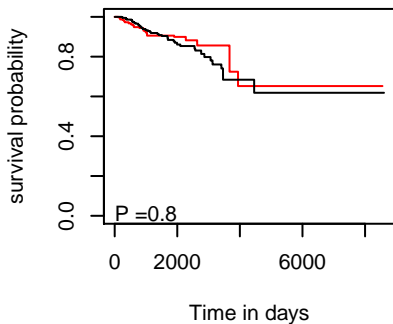**OS hsa-mir-625**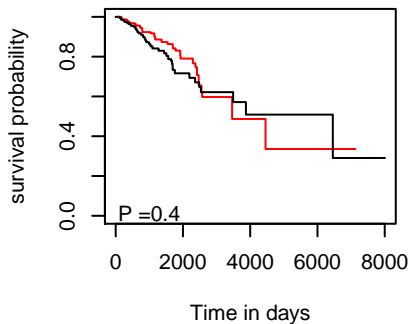**PFI hsa-mir-625**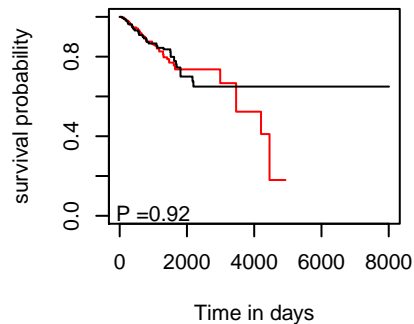**DFI hsa-mir-625**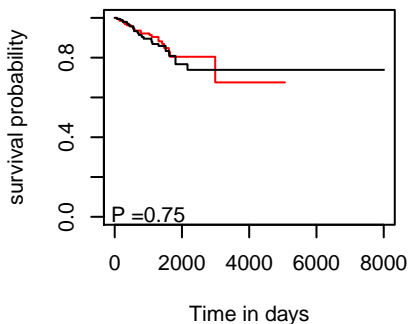**DSS hsa-mir-625**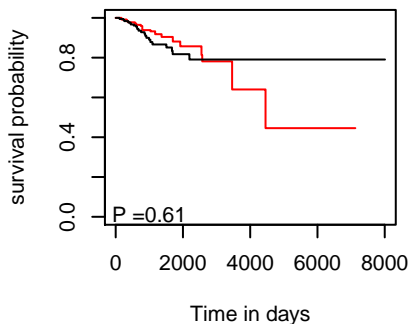**OS hsa-mir-6762**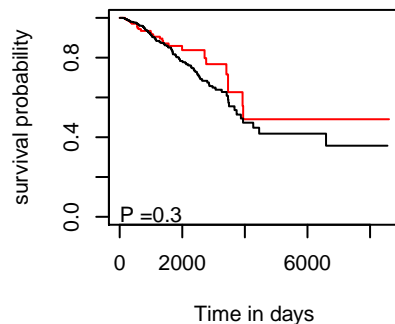**PFI hsa-mir-6762**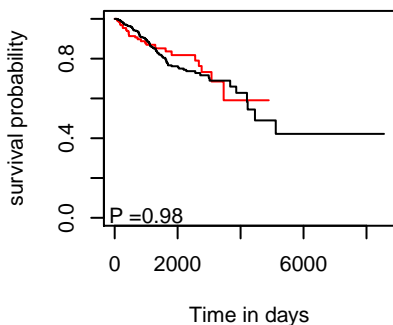**DFI hsa-mir-6762**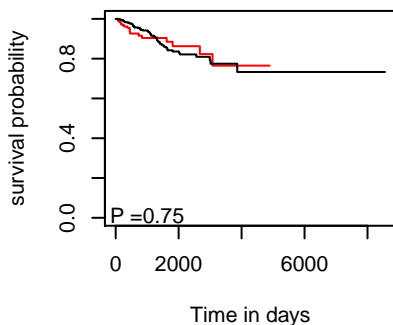**DSS hsa-mir-6762**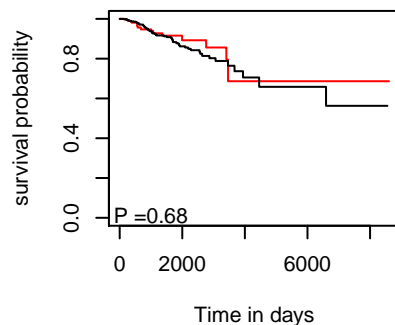

**OS hsa-mir-5694**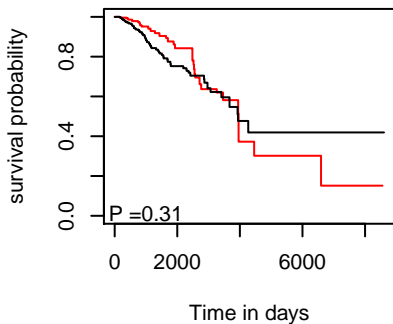**PFI hsa-mir-5694**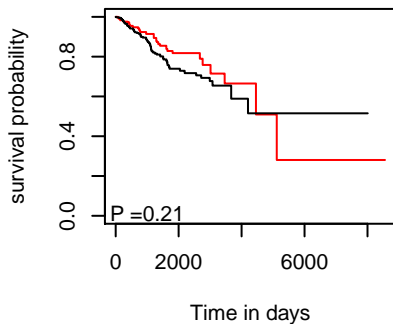**DFI hsa-mir-5694**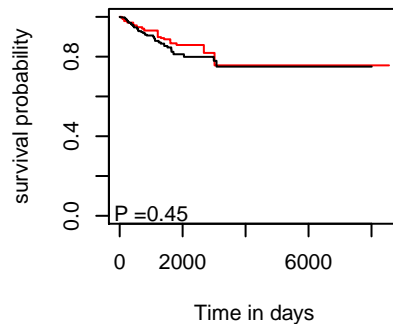**DSS hsa-mir-5694**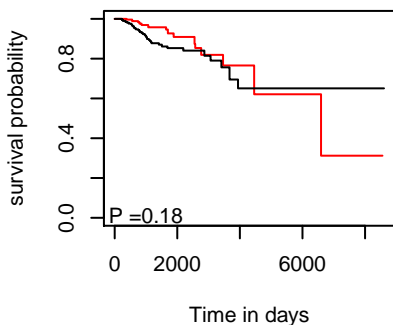**OS hsa-mir-656**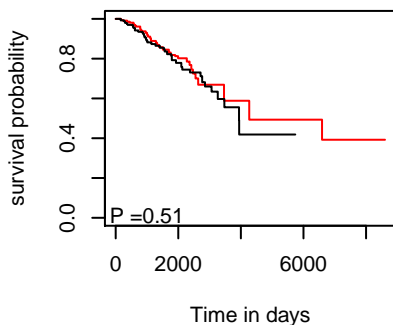**PFI hsa-mir-656**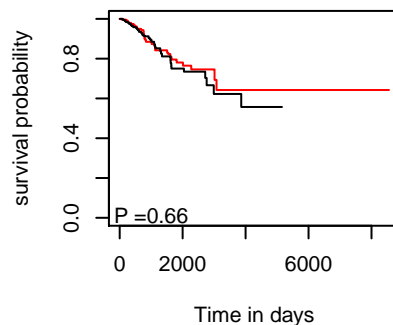**DFI hsa-mir-656**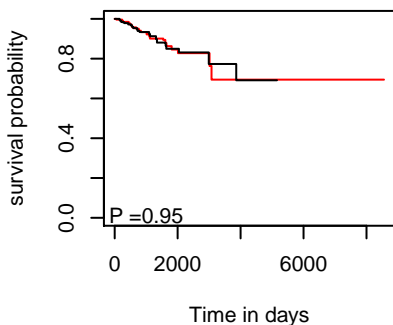**DSS hsa-mir-656**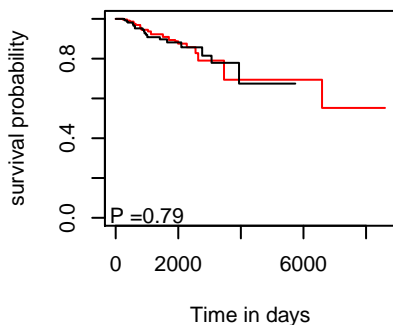**OS hsa-mir-6764**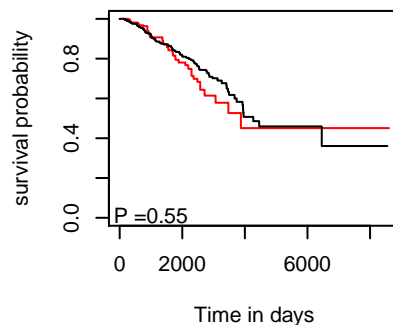

**PFI hsa-mir-6764**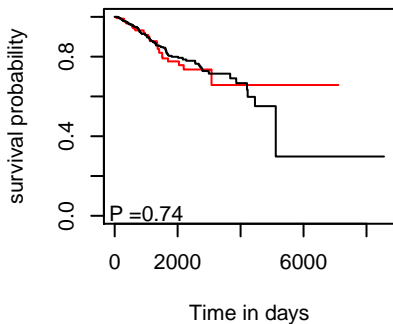**DFI hsa-mir-6764**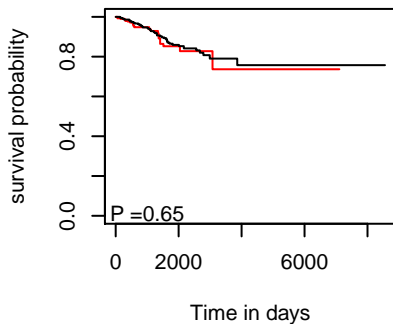**DSS hsa-mir-6764**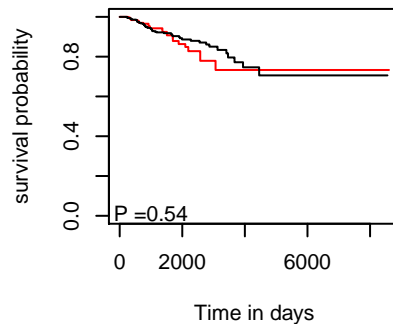**OS hsa-mir-4745**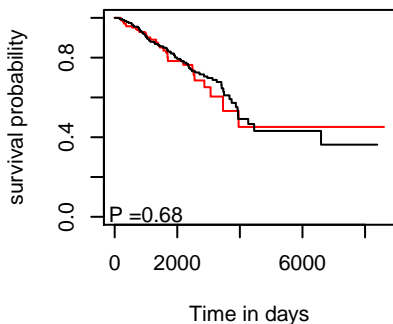**PFI hsa-mir-4745**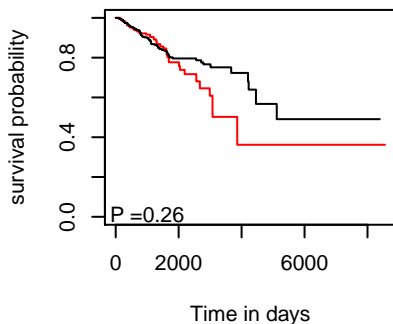**DFI hsa-mir-4745**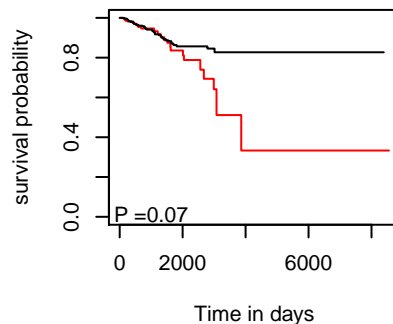**DSS hsa-mir-4745**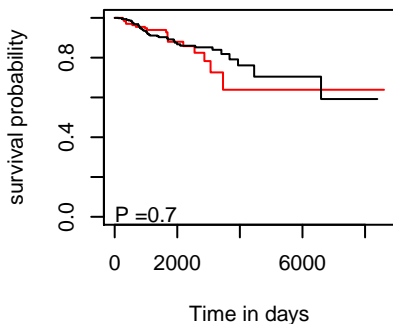**OS hsa-mir-382**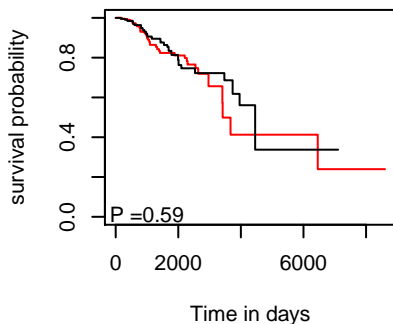**PFI hsa-mir-382**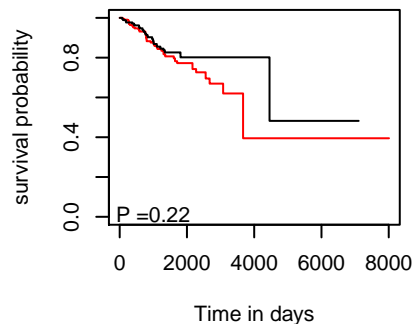

**DFI hsa-mir-382**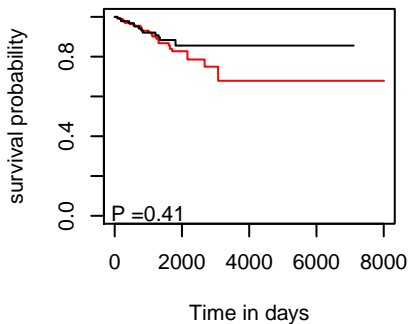**DSS hsa-mir-382**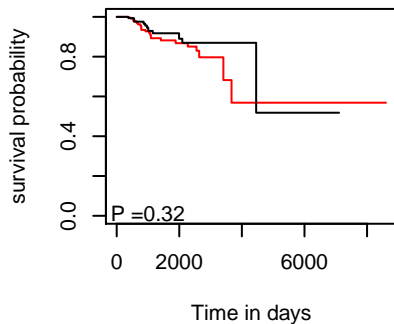**OS hsa-mir-4709**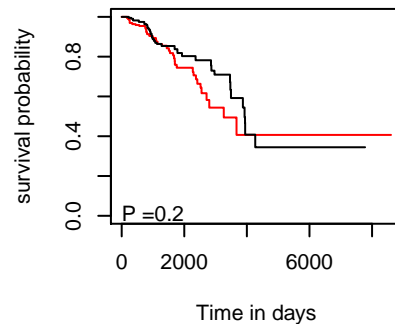**PFI hsa-mir-4709**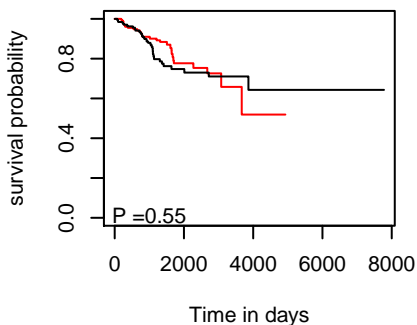**DFI hsa-mir-4709**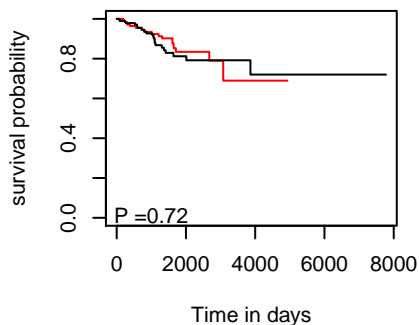**DSS hsa-mir-4709**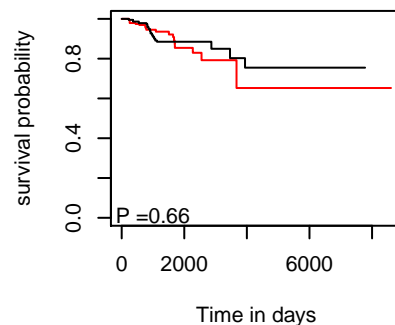**OS hsa-mir-627**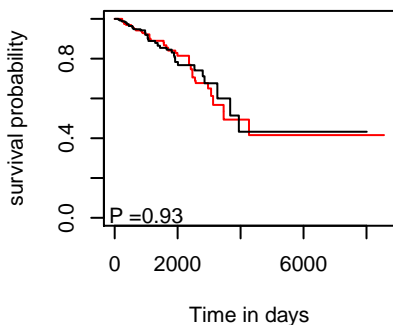**PFI hsa-mir-627**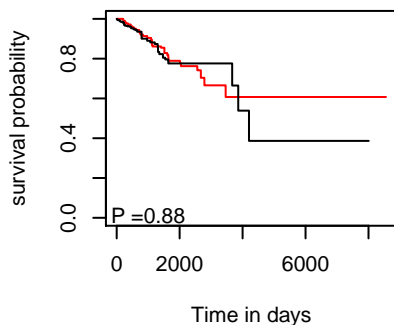**DFI hsa-mir-627**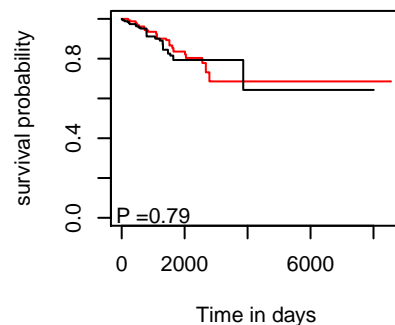

**DSS hsa-mir-627**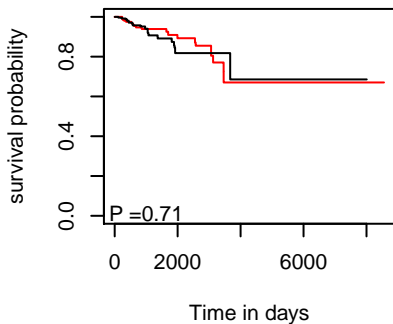**OS hsa-mir-1287**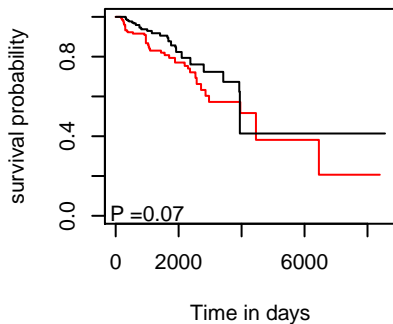**PFI hsa-mir-1287**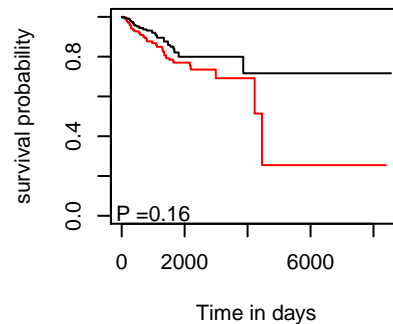**DFI hsa-mir-1287**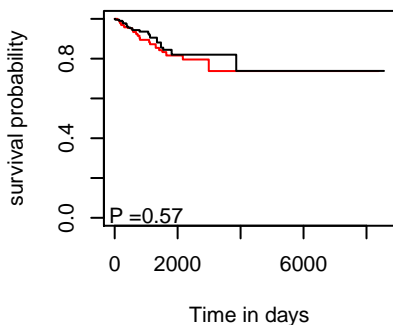**DSS hsa-mir-1287**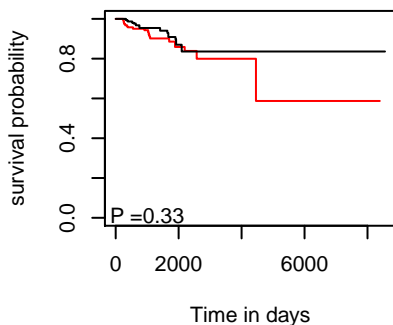**OS hsa-mir-320d-1**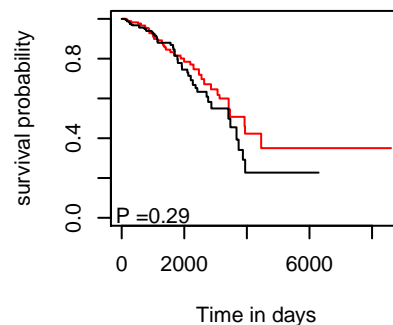**PFI hsa-mir-320d-1**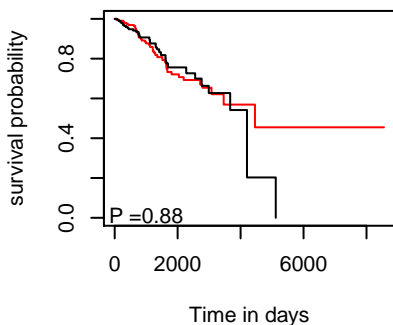**DFI hsa-mir-320d-1**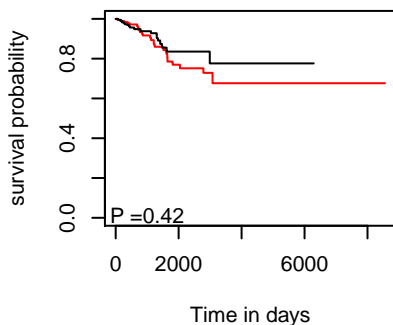**DSS hsa-mir-320d-1**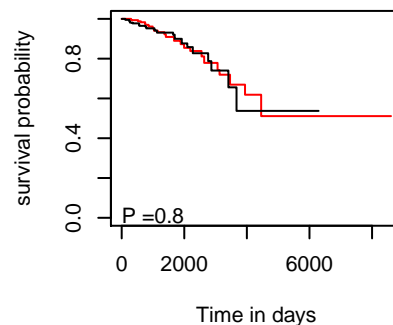

**OS hsa-mir-1247**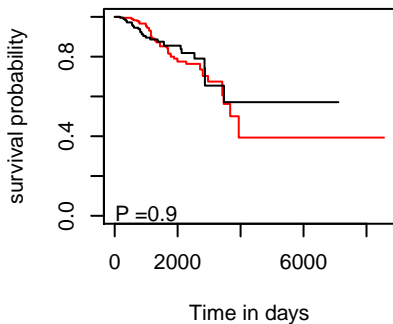**PFI hsa-mir-1247**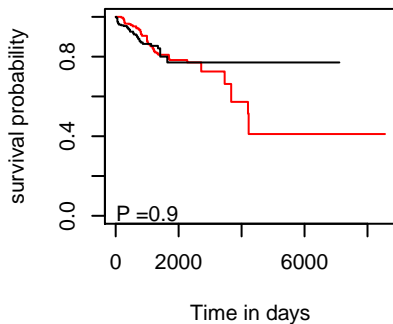**DFI hsa-mir-1247**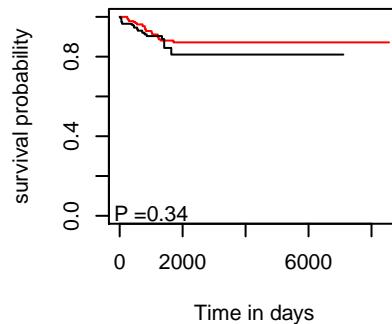**DSS hsa-mir-1247**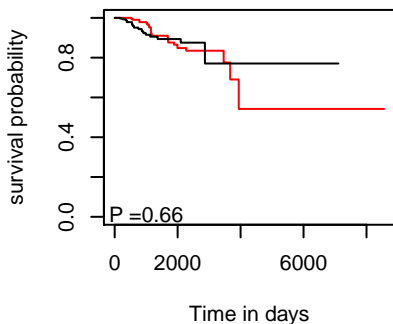**OS hsa-mir-4326**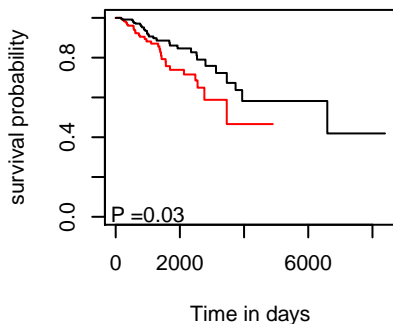**PFI hsa-mir-4326**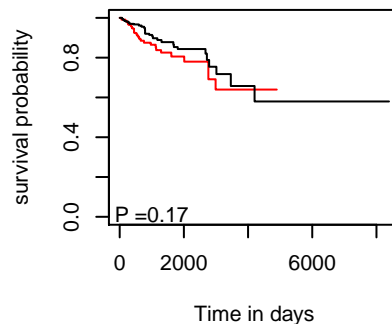**DFI hsa-mir-4326**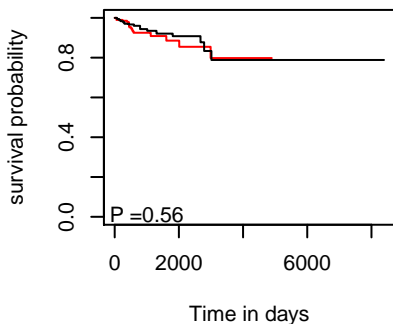**DSS hsa-mir-4326**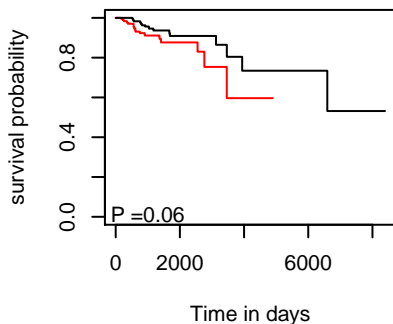**OS hsa-mir-378d-2**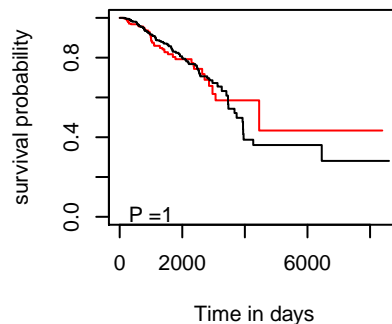

**PFI hsa-mir-378d-2**

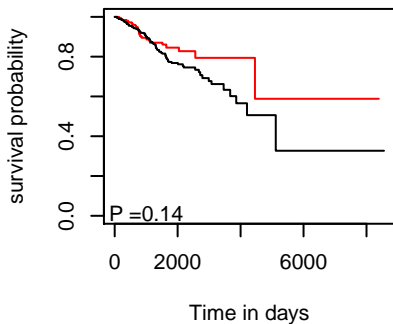

**DFI hsa-mir-378d-2**

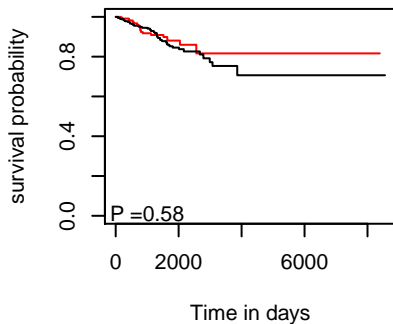

**DSS hsa-mir-378d-2**

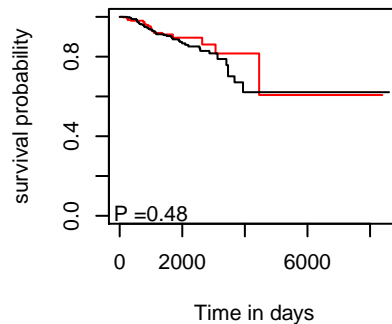

**OS hsa-mir-6715a**

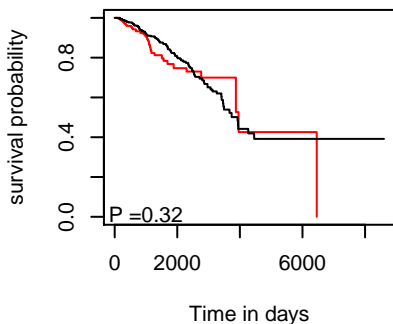

**PFI hsa-mir-6715a**

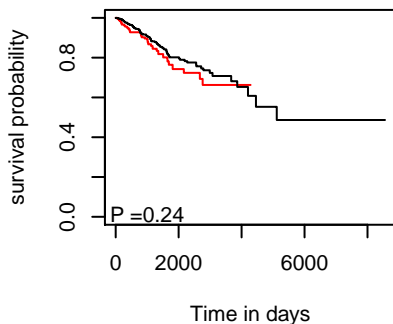

**DFI hsa-mir-6715a**

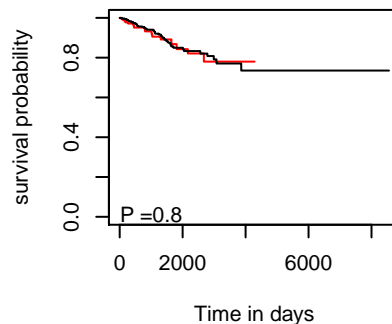

**DSS hsa-mir-6715a**

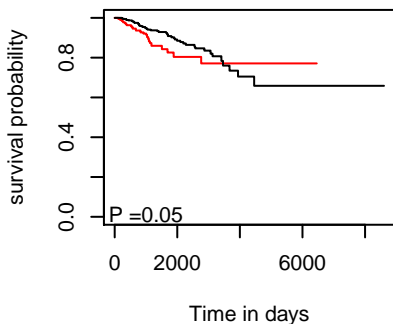

**OS hsa-mir-548v**

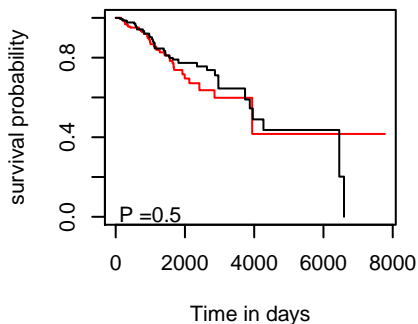

**PFI hsa-mir-548v**

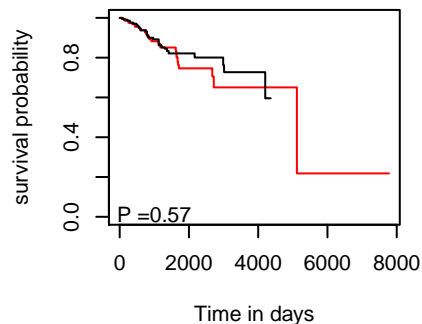

**DFI hsa-mir-548v**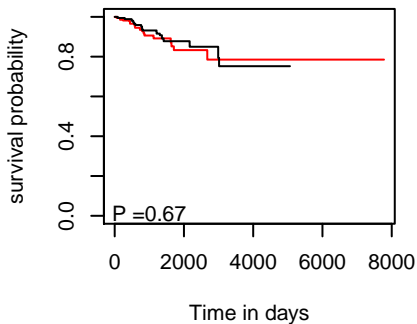**DSS hsa-mir-548v**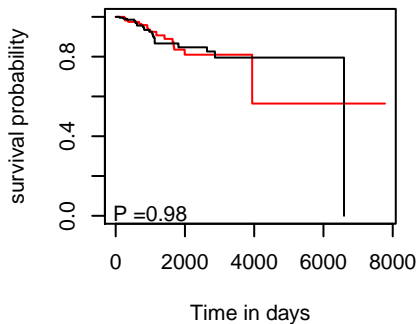**OS hsa-mir-146b**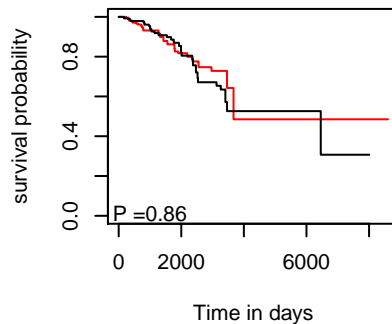**PFI hsa-mir-146b**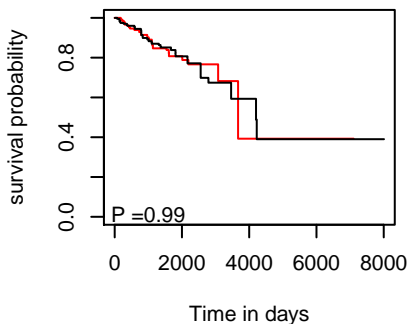**DFI hsa-mir-146b**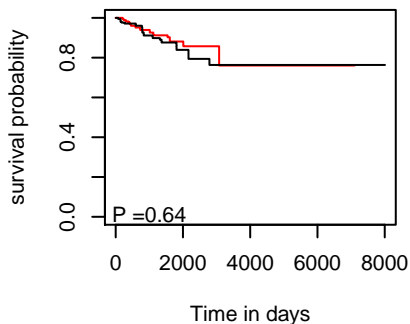**DSS hsa-mir-146b**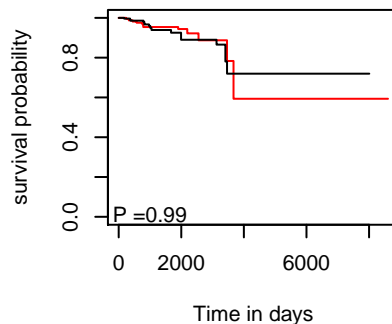**OS hsa-mir-320a**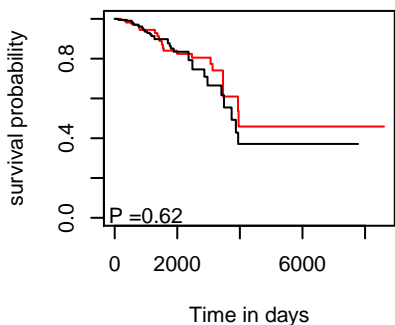**PFI hsa-mir-320a**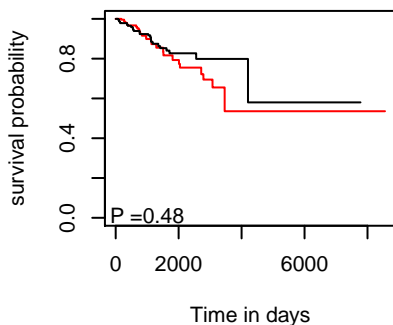**DFI hsa-mir-320a**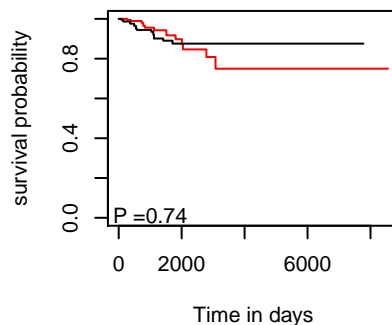

**DSS hsa-mir-320a**

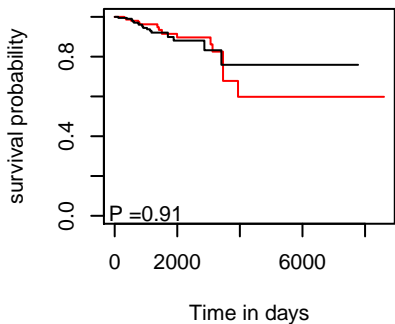

**OS hsa-mir-378c**

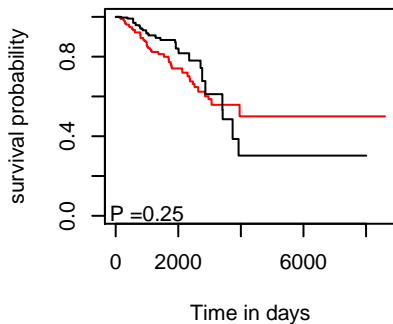

**PFI hsa-mir-378c**

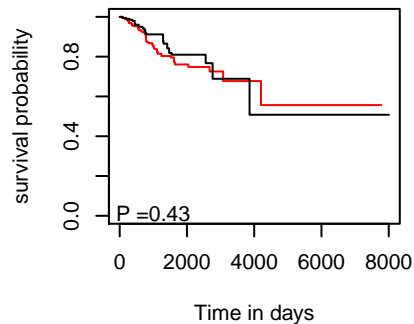

**DFI hsa-mir-378c**

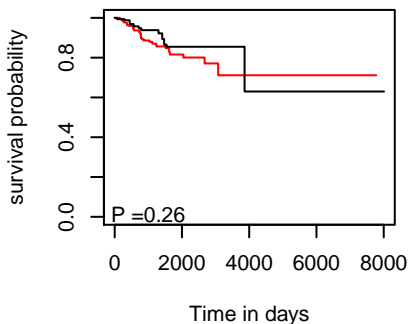

**DSS hsa-mir-378c**

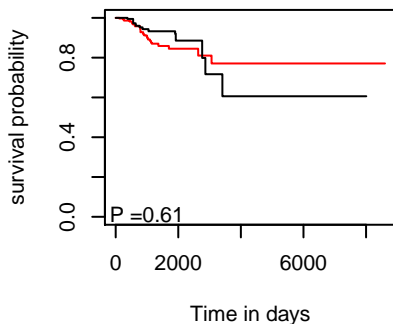

**OS hsa-mir-4532**

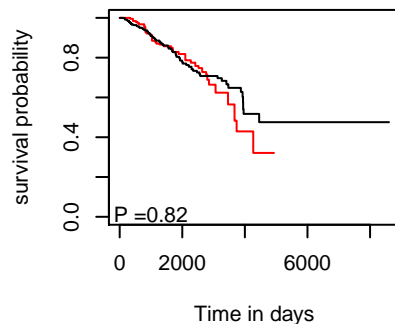

**PFI hsa-mir-4532**

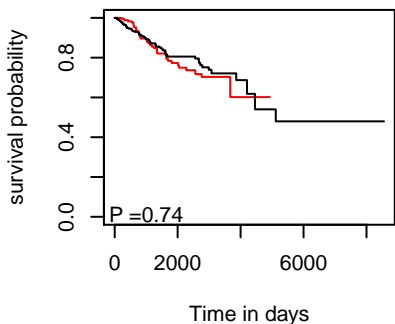

**DFI hsa-mir-4532**

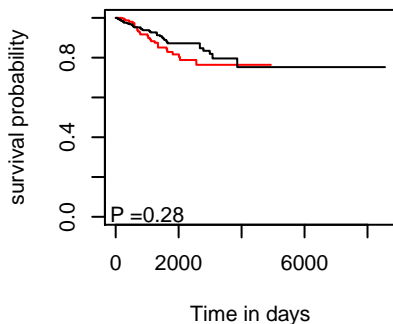

**DSS hsa-mir-4532**

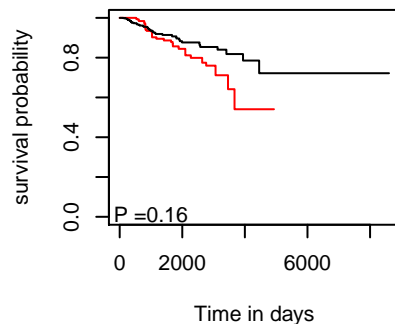

**OS hsa-mir-6803**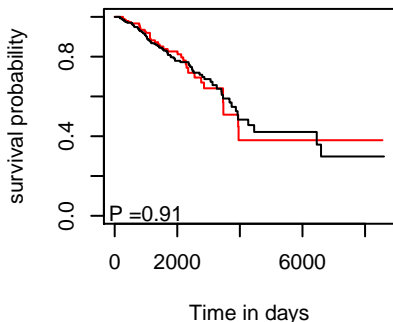**PFI hsa-mir-6803**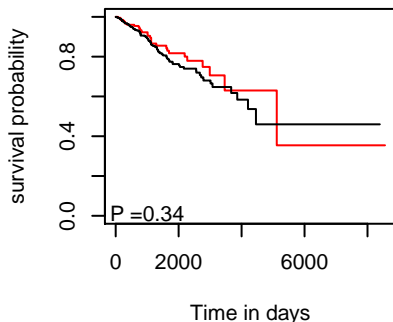**DFI hsa-mir-6803**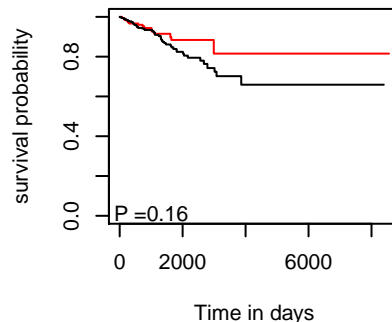**DSS hsa-mir-6803**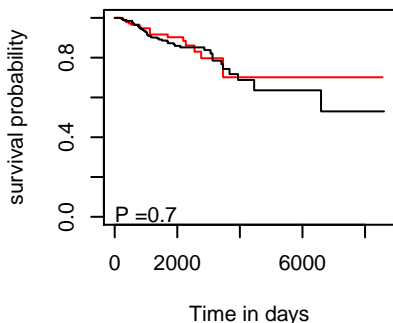**OS hsa-mir-147b**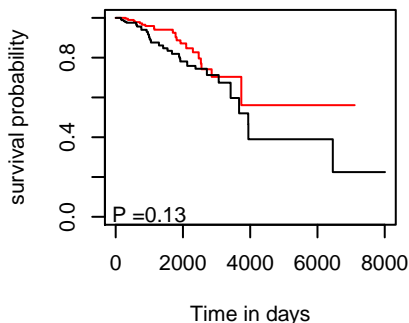**PFI hsa-mir-147b**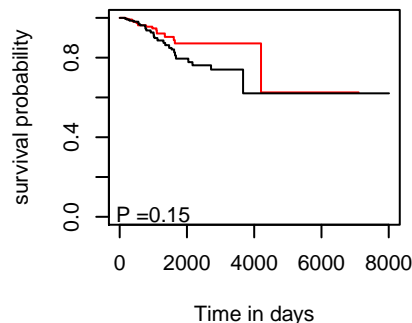**DFI hsa-mir-147b**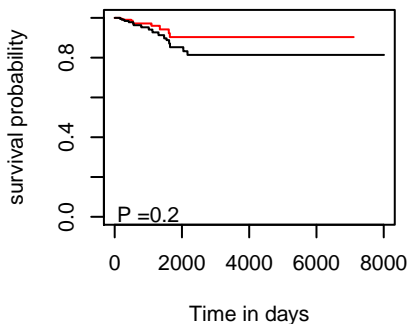**DSS hsa-mir-147b**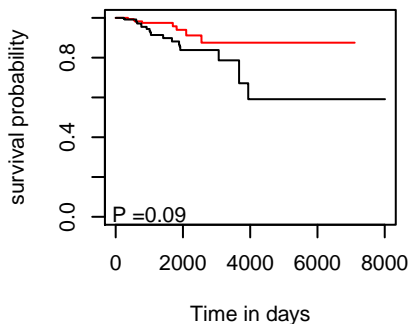**OS hsa-mir-487b**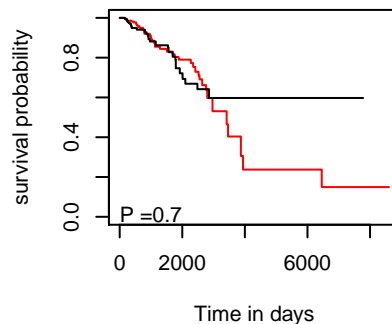

**PFI hsa-mir-487b**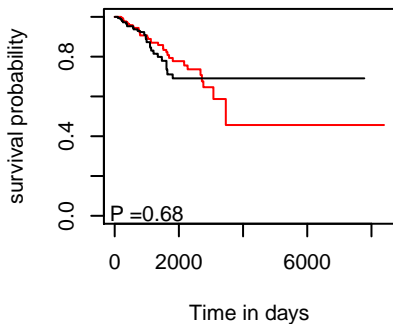**DFI hsa-mir-487b**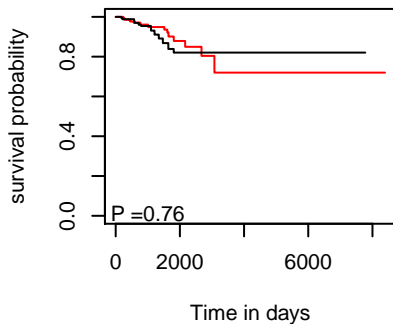**DSS hsa-mir-487b**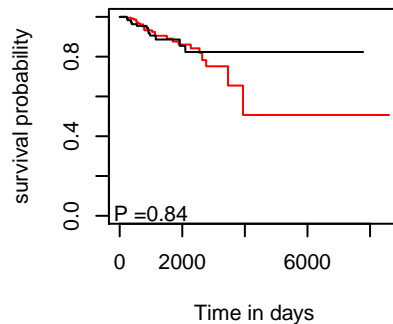**OS hsa-mir-376a-2**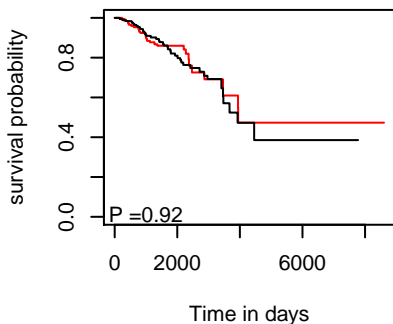**PFI hsa-mir-376a-2**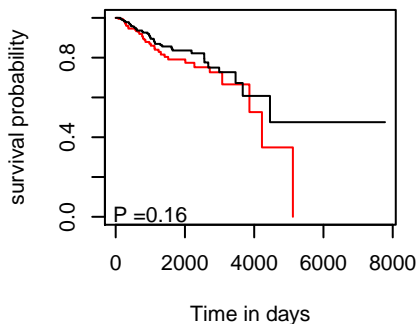**DFI hsa-mir-376a-2**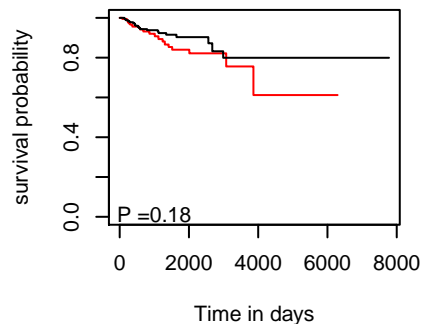**DSS hsa-mir-376a-2**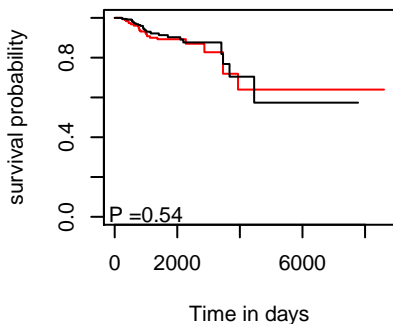**OS hsa-mir-412**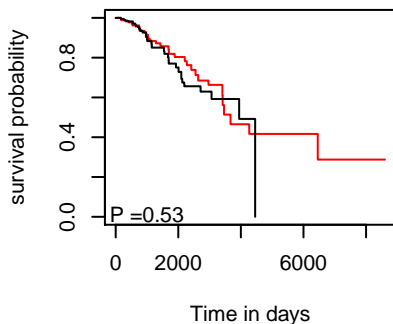**PFI hsa-mir-412**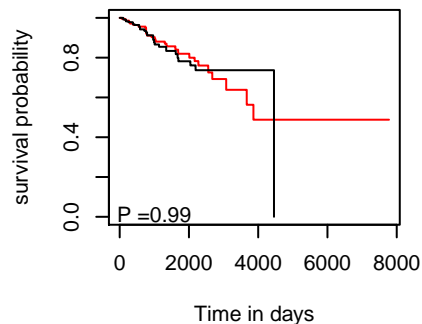

**DFI hsa-mir-412**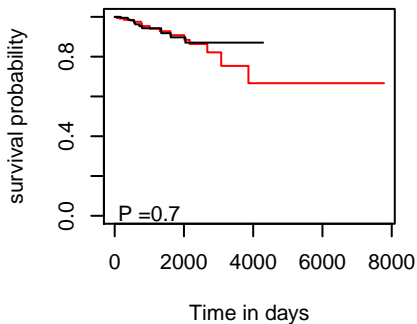**DSS hsa-mir-412**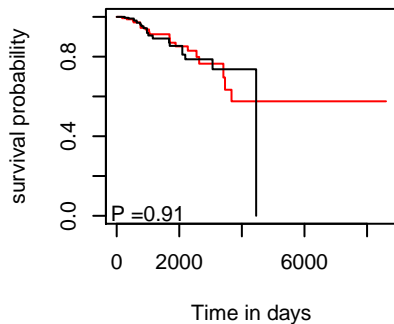**OS hsa-mir-431**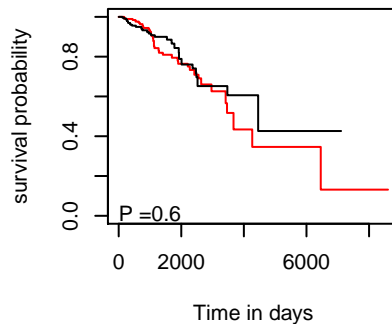**PFI hsa-mir-431**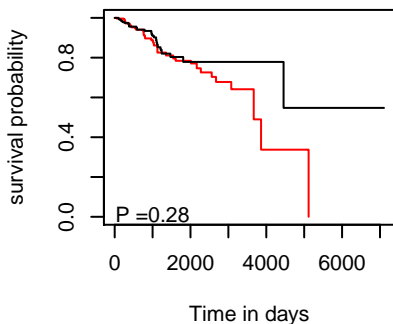**DFI hsa-mir-431**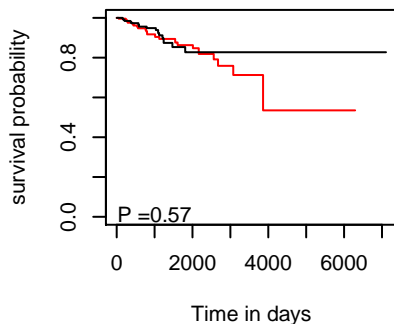**DSS hsa-mir-431**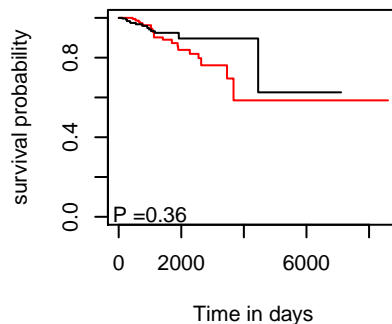**OS hsa-mir-493**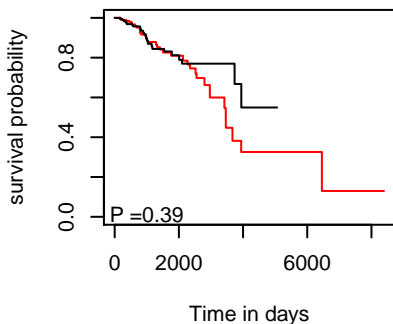**PFI hsa-mir-493**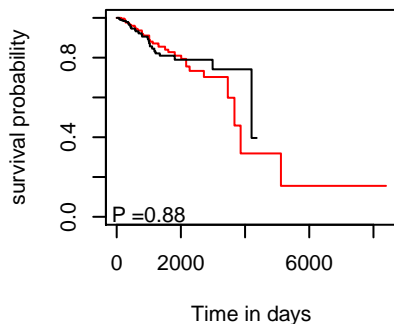**DFI hsa-mir-493**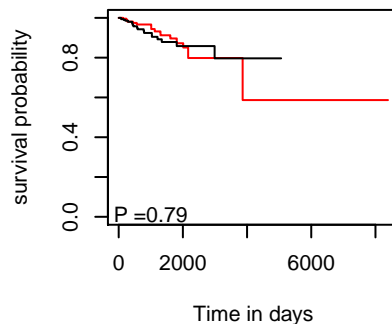

**DSS hsa-mir-493**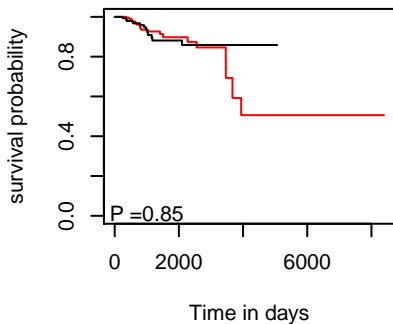**OS hsa-mir-494**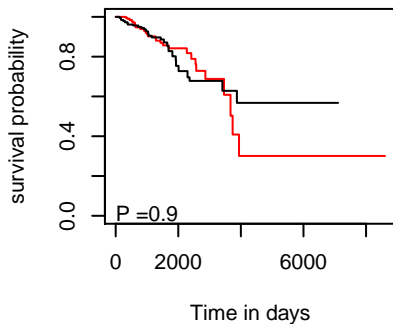**PFI hsa-mir-494**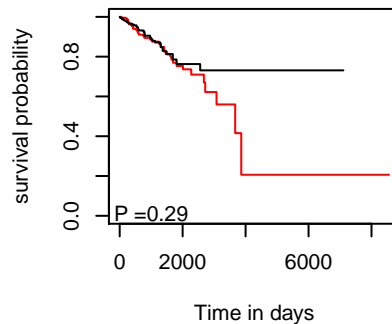**DFI hsa-mir-494**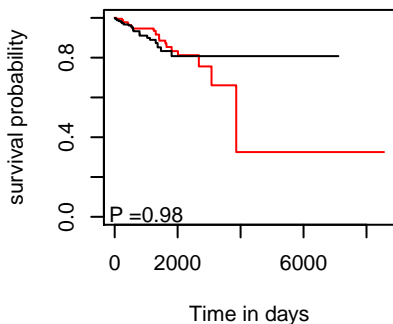**DSS hsa-mir-494**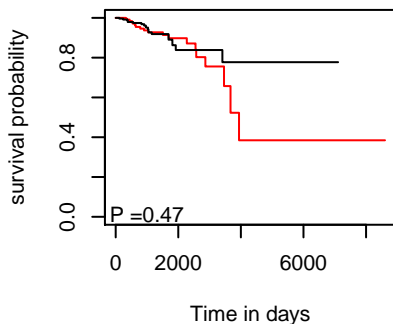**OS hsa-mir-543**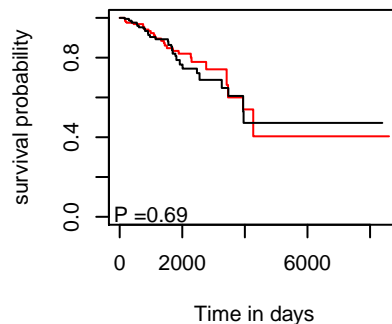**PFI hsa-mir-543**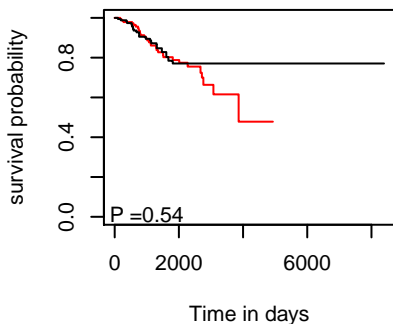**DFI hsa-mir-543**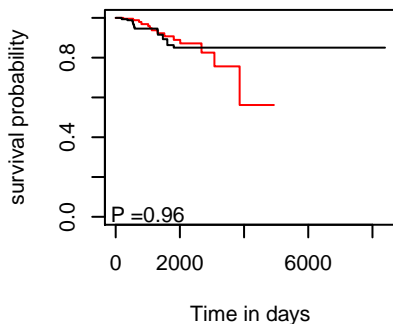**DSS hsa-mir-543**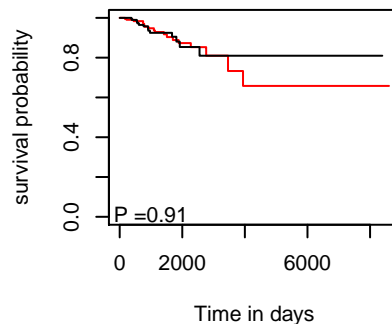

**OS hsa-mir-598**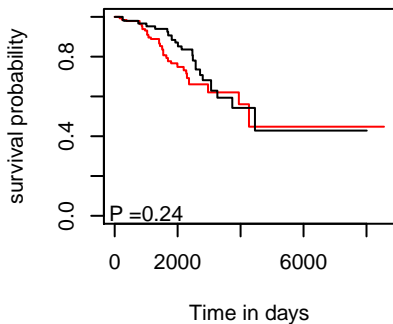**PFI hsa-mir-598**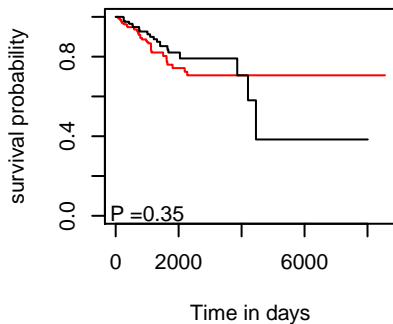**DFI hsa-mir-598**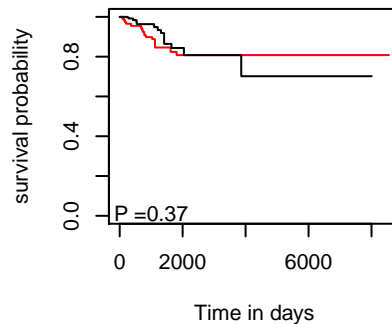**DSS hsa-mir-598**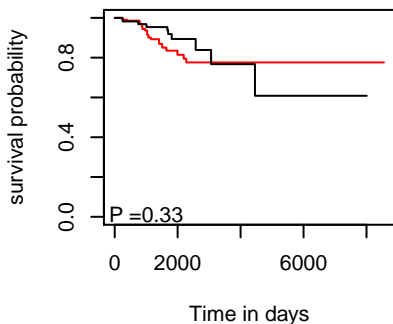**OS hsa-mir-628**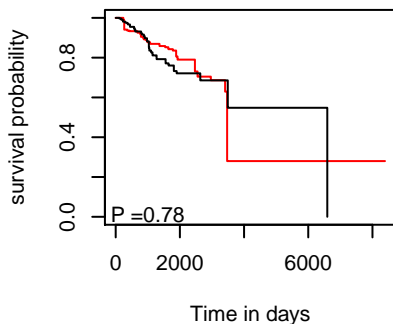**PFI hsa-mir-628**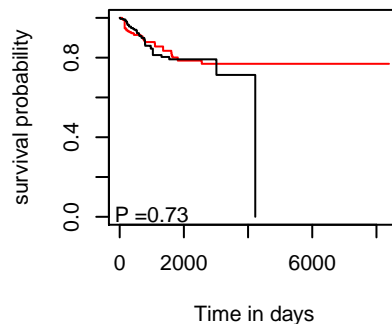**DFI hsa-mir-628**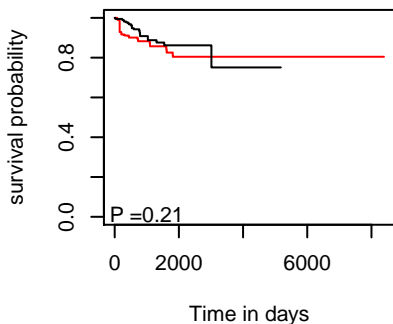**DSS hsa-mir-628**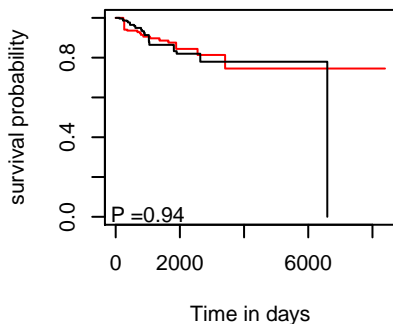**OS hsa-mir-1304**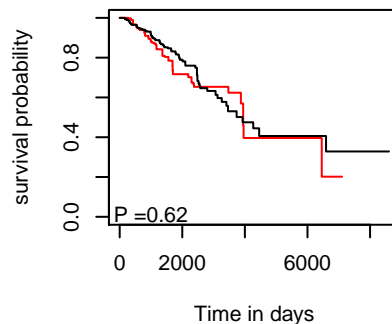

**PFI hsa-mir-1304**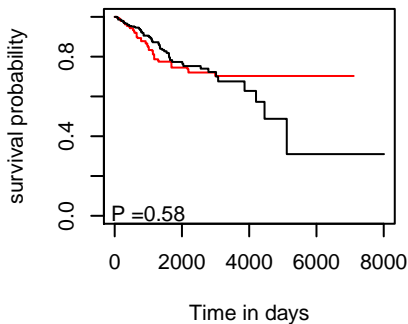**DFI hsa-mir-1304**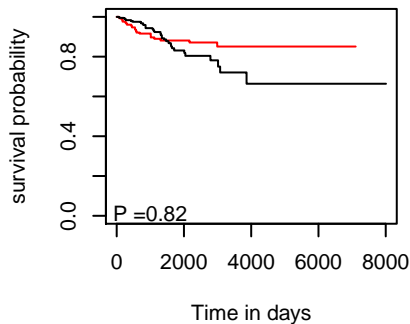**DSS hsa-mir-1304**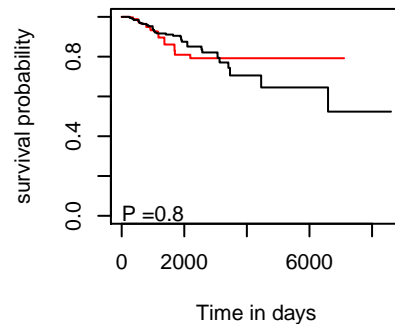**OS hsa-mir-6843**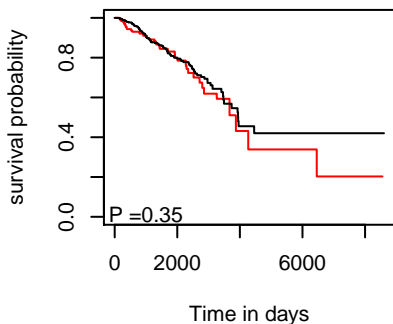**PFI hsa-mir-6843**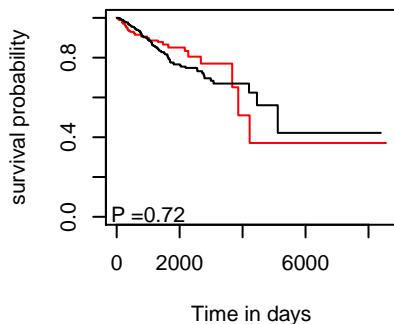**DFI hsa-mir-6843**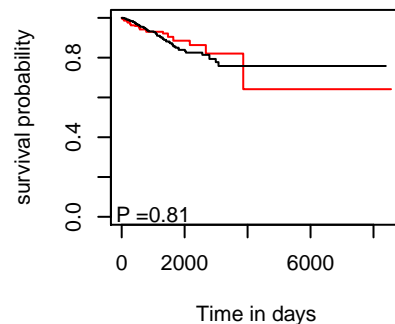**DSS hsa-mir-6843**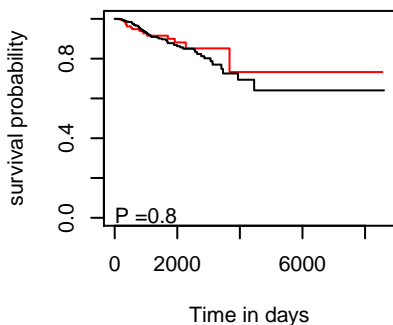**OS hsa-mir-127**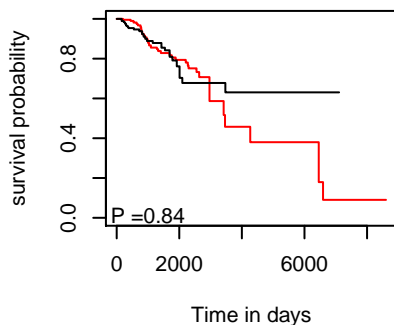**PFI hsa-mir-127**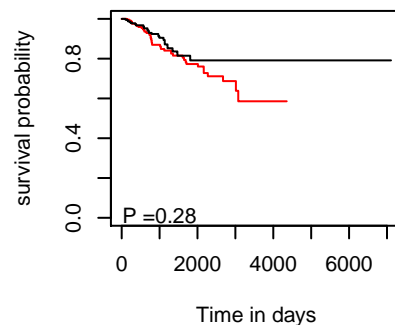

**DFI hsa-mir-127**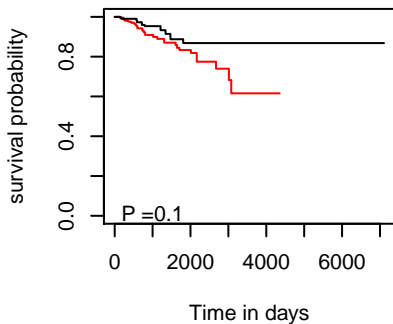**DSS hsa-mir-127**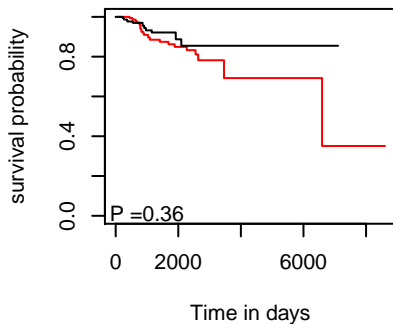**OS hsa-mir-432**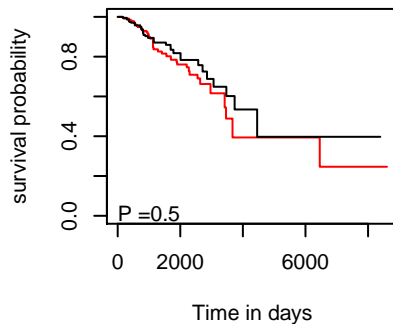**PFI hsa-mir-432**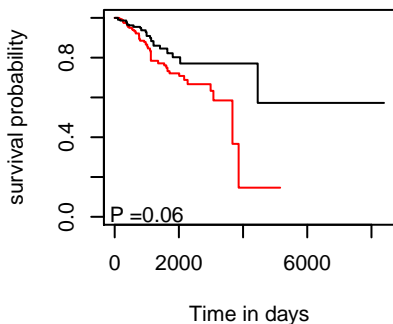**DFI hsa-mir-432**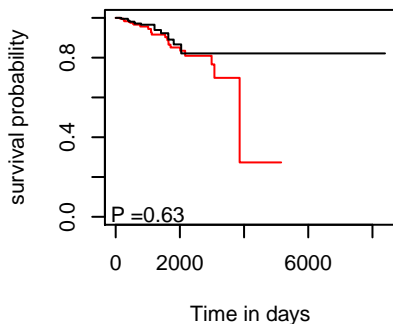**DSS hsa-mir-432**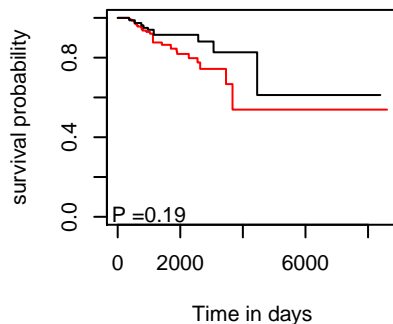**OS hsa-mir-495**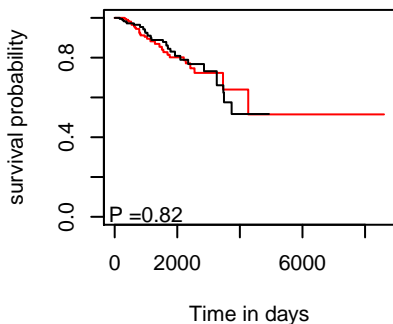**PFI hsa-mir-495**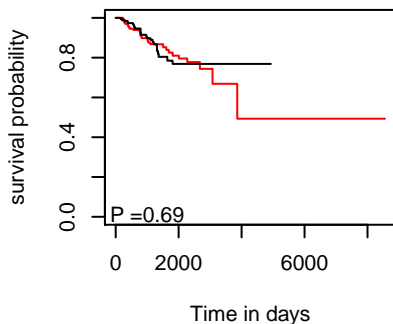**DFI hsa-mir-495**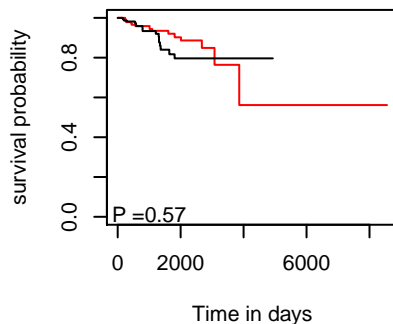

**DSS hsa-mir-495**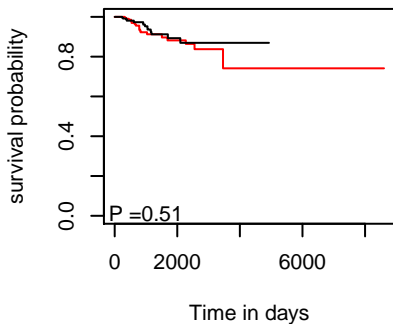**OS hsa-mir-485**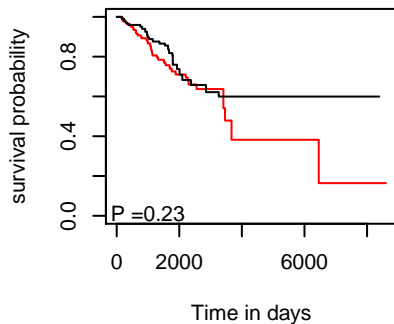**PFI hsa-mir-485**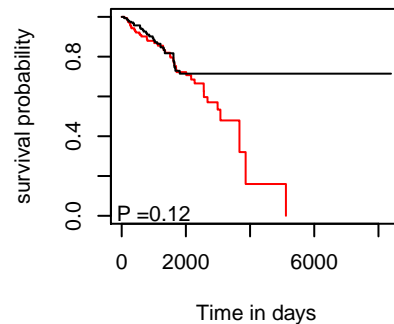**DFI hsa-mir-485**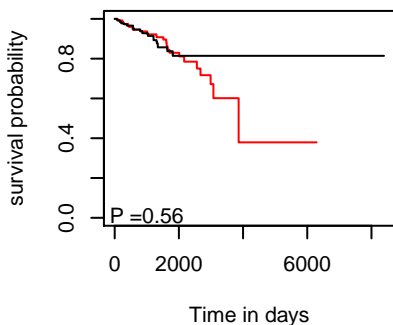**DSS hsa-mir-485**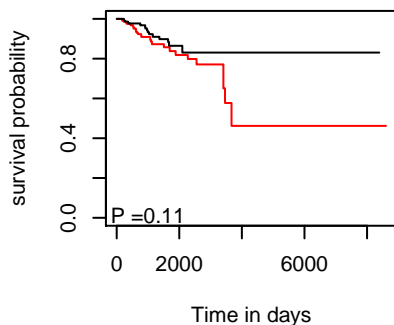**OS hsa-mir-496**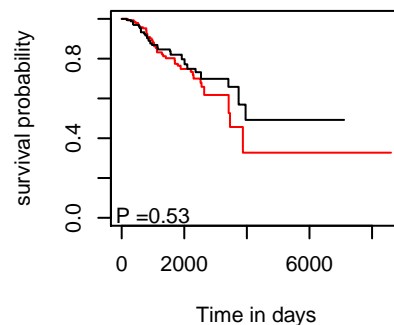**PFI hsa-mir-496**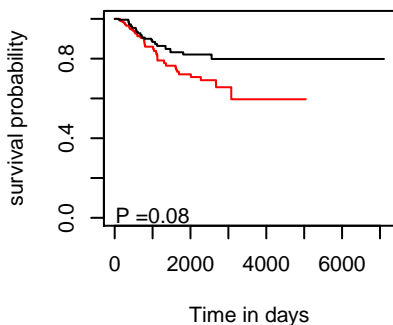**DFI hsa-mir-496**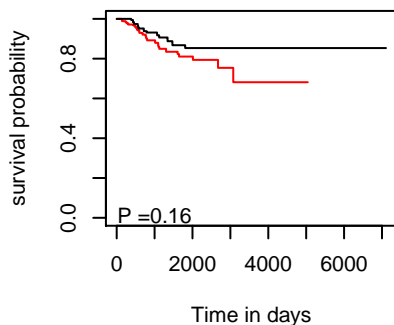**DSS hsa-mir-496**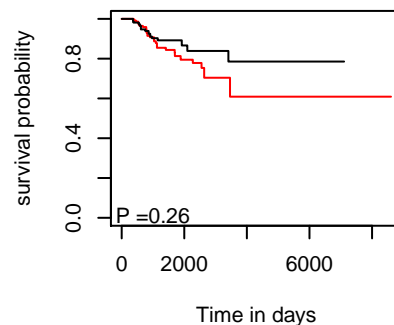

**OS hsa-mir-1226**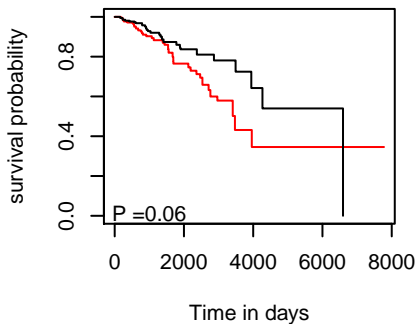**PFI hsa-mir-1226**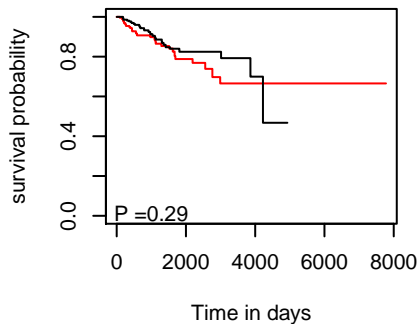**DFI hsa-mir-1226**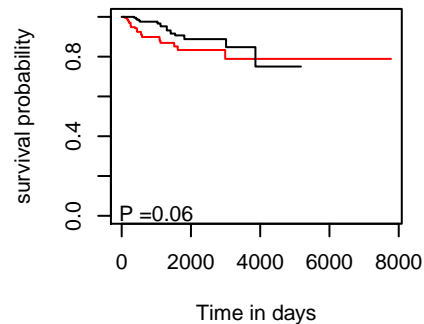**DSS hsa-mir-1226**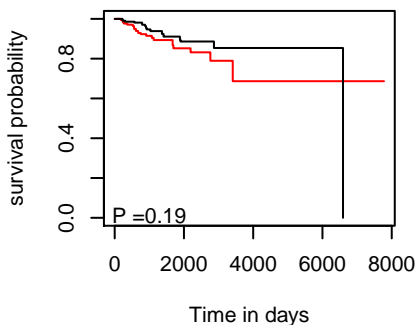**OS hsa-let-7g**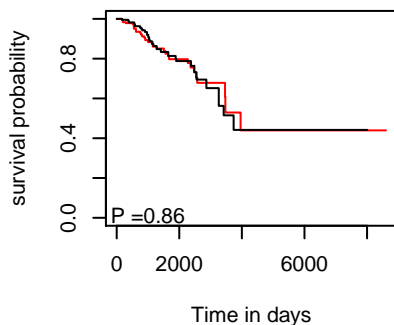**PFI hsa-let-7g**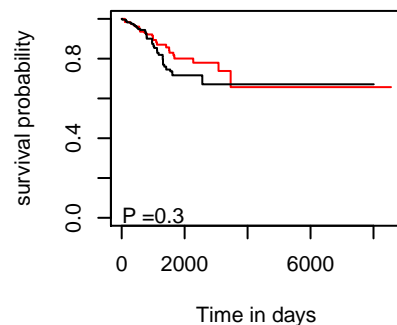**DFI hsa-let-7g**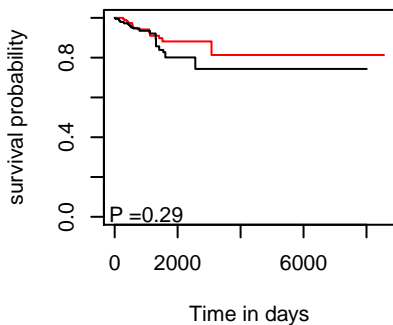**DSS hsa-let-7g**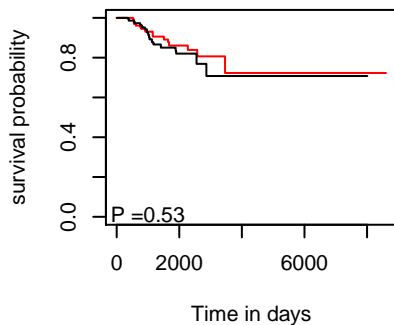**OS hsa-mir-100**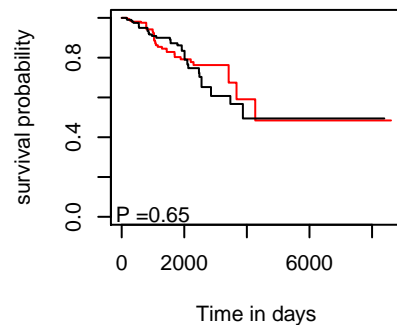

**PFI hsa-mir-100**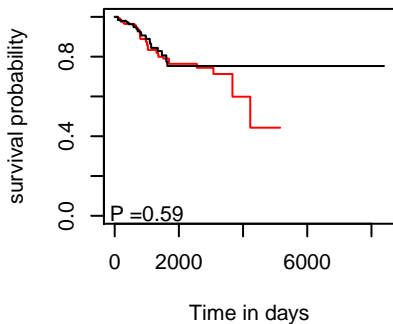**DFI hsa-mir-100**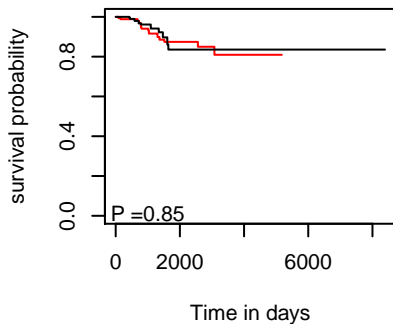**DSS hsa-mir-100**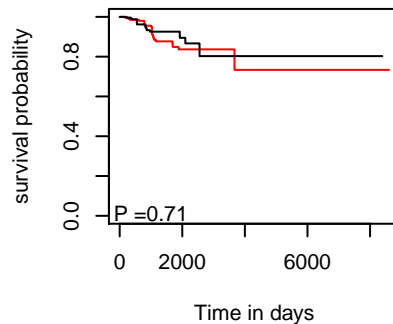**OS hsa-mir-125b-1**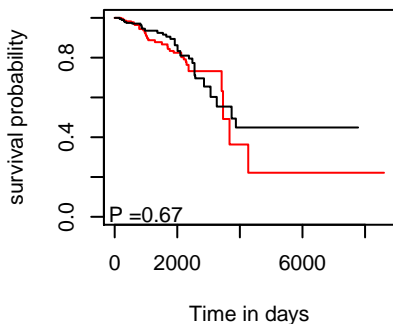**PFI hsa-mir-125b-1**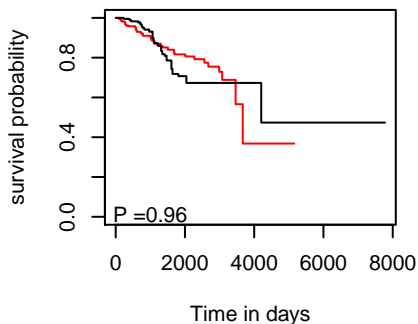**DFI hsa-mir-125b-1**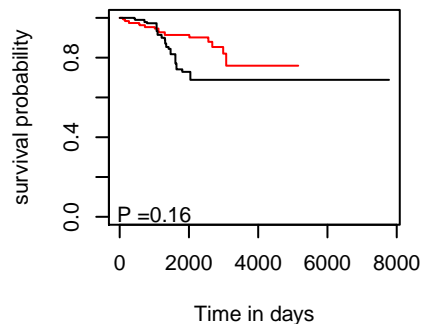**DSS hsa-mir-125b-1**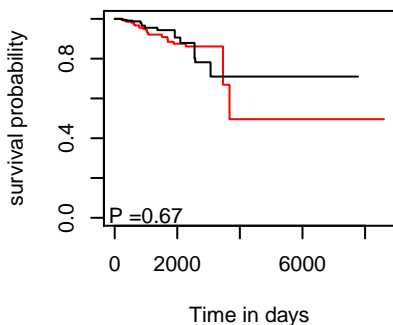**OS hsa-mir-1266**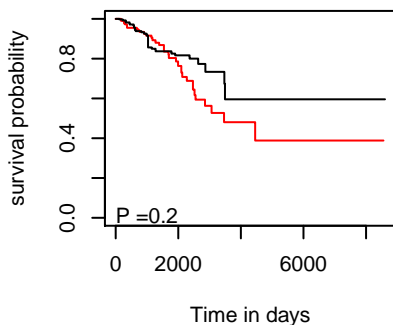**PFI hsa-mir-1266**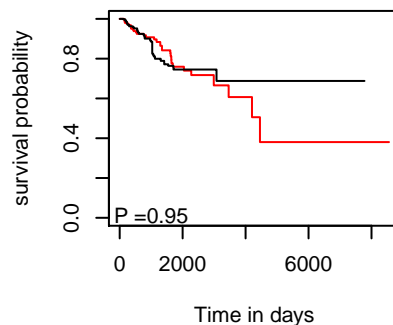

**DFI hsa-mir-1266**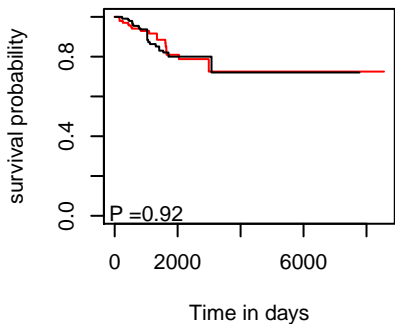**DSS hsa-mir-1266**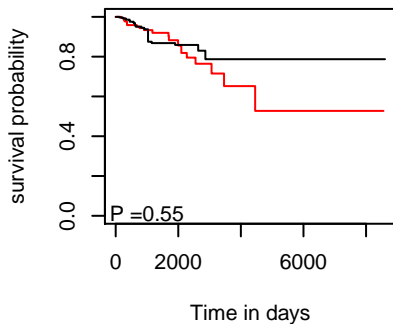**OS hsa-mir-296**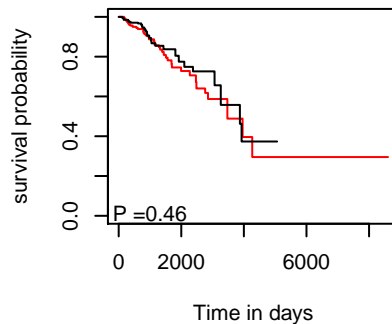**PFI hsa-mir-296**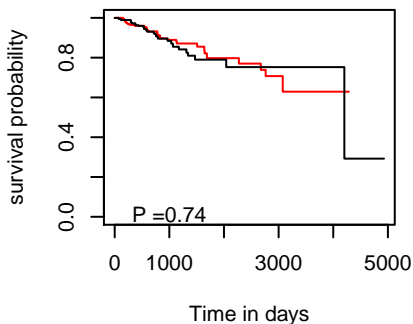**DFI hsa-mir-296**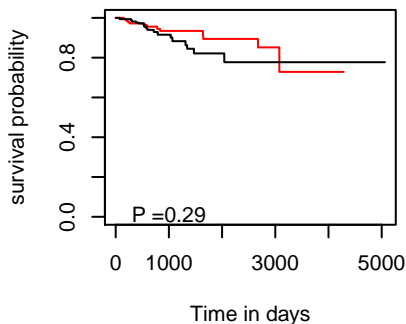**DSS hsa-mir-296**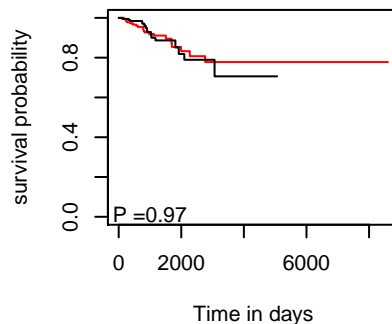**OS hsa-mir-34b**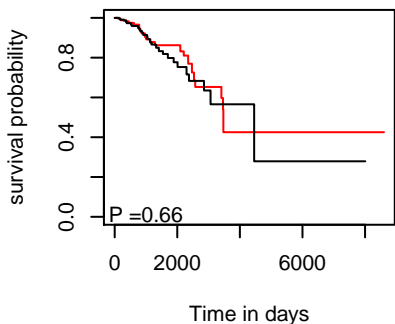**PFI hsa-mir-34b**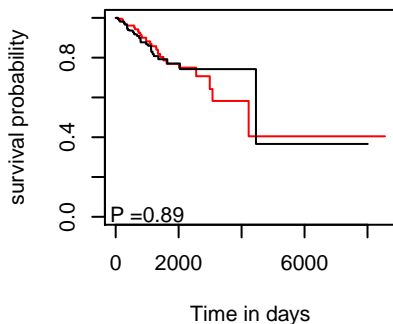**DFI hsa-mir-34b**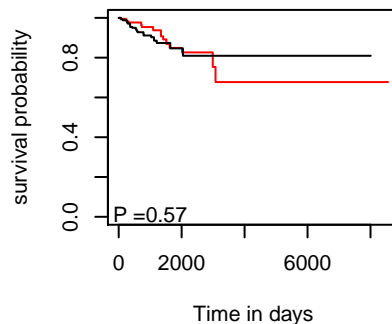



**OS hsa-mir-4491**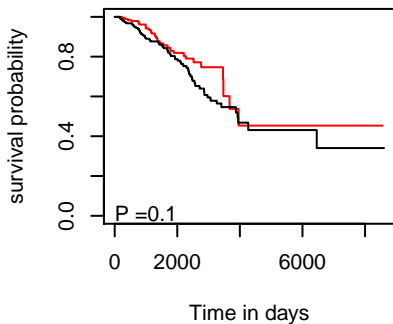**PFI hsa-mir-4491**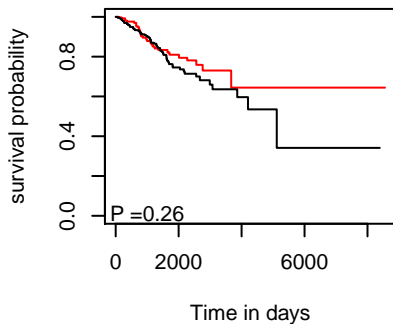**DFI hsa-mir-4491**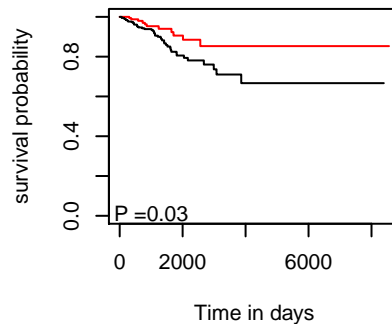**DSS hsa-mir-4491**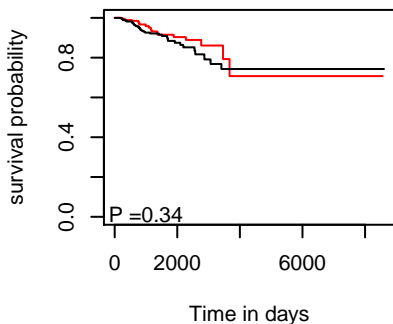**OS hsa-mir-4492**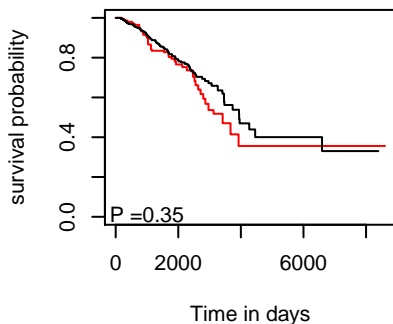**PFI hsa-mir-4492**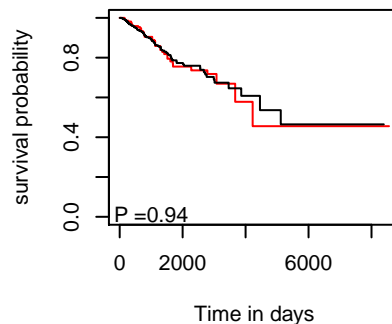**DFI hsa-mir-4492**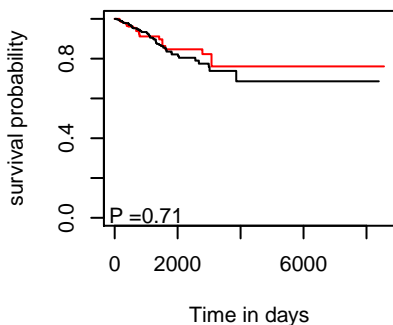**DSS hsa-mir-4492**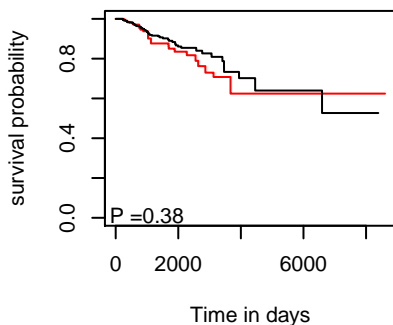**OS hsa-mir-6716**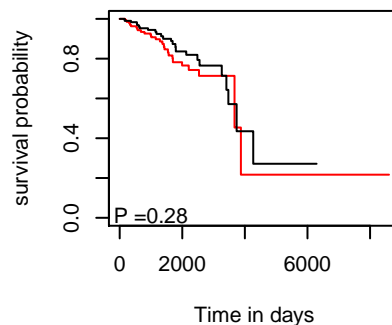

**PFI hsa-mir-6716**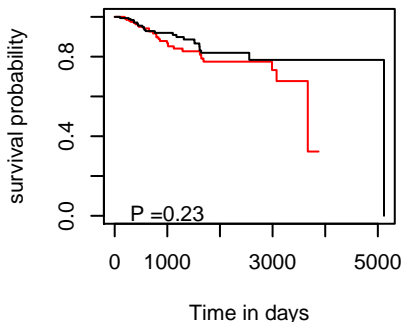**DFI hsa-mir-6716**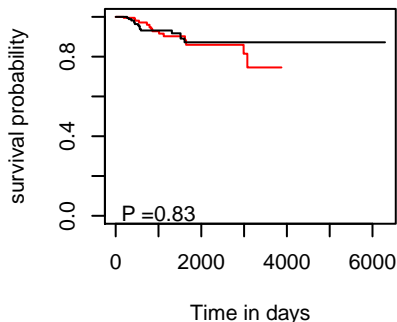**DSS hsa-mir-6716**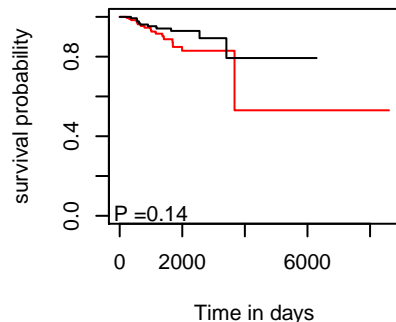**OS hsa-mir-7641-1**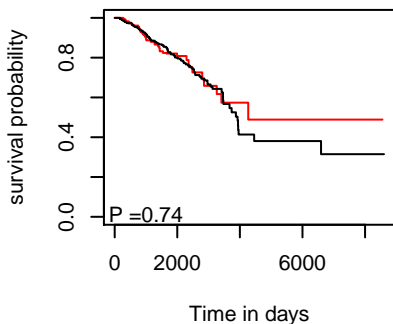**PFI hsa-mir-7641-1**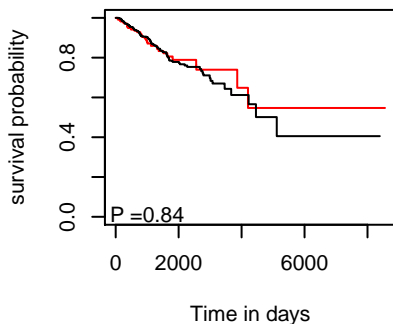**DFI hsa-mir-7641-1**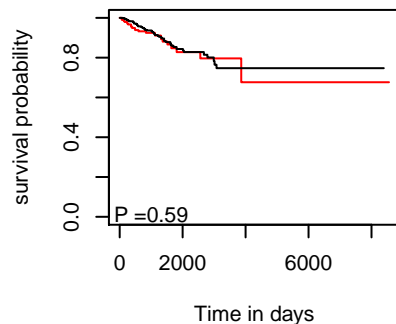**DSS hsa-mir-7641-1**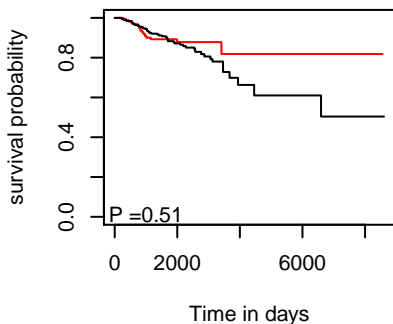**OS hsa-mir-758**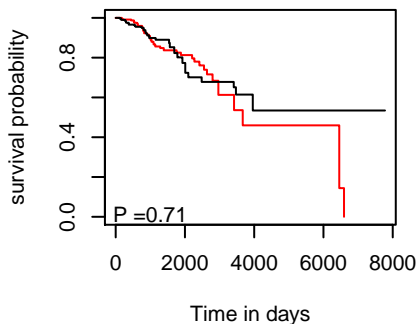**PFI hsa-mir-758**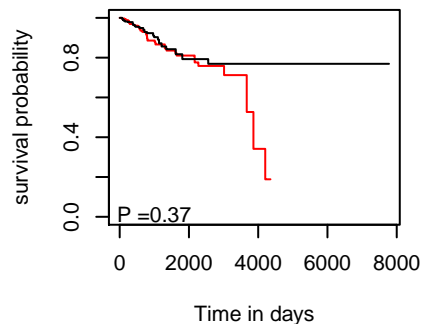

**DFI hsa-mir-758**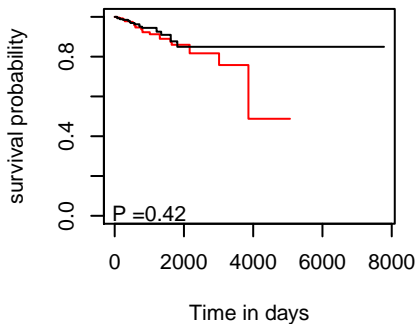**DSS hsa-mir-758**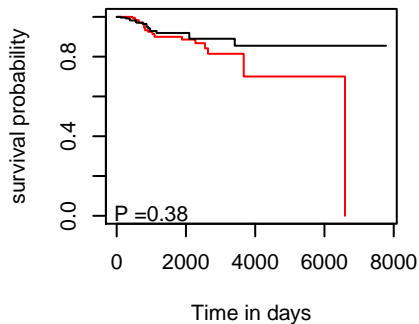**OS hsa-mir-3622a**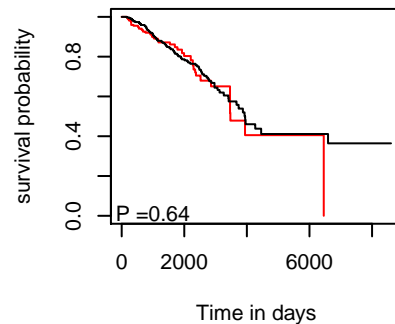**PFI hsa-mir-3622a**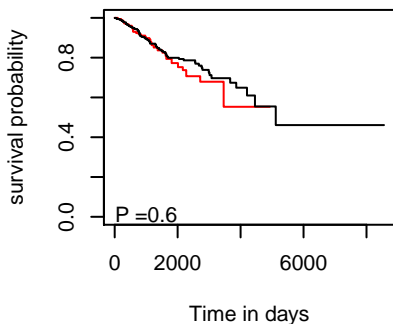**DFI hsa-mir-3622a**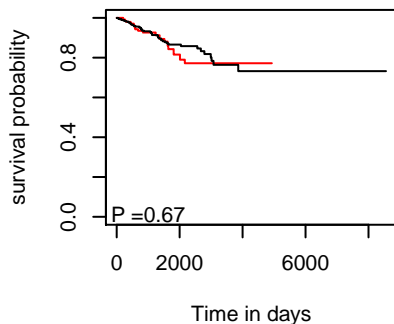**DSS hsa-mir-3622a**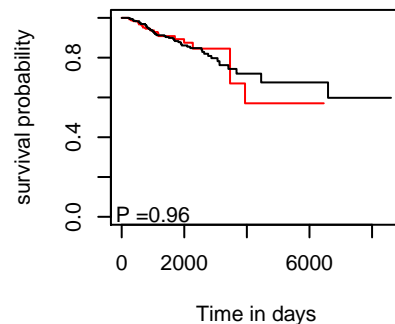**OS hsa-mir-15a**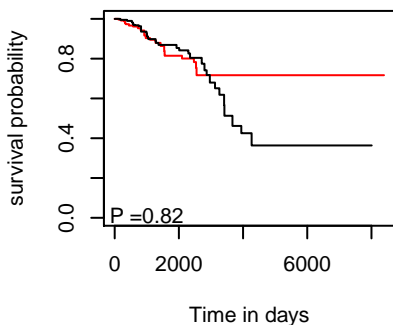**PFI hsa-mir-15a**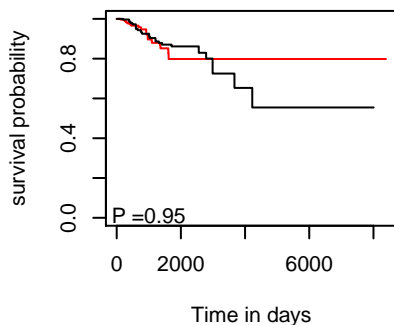**DFI hsa-mir-15a**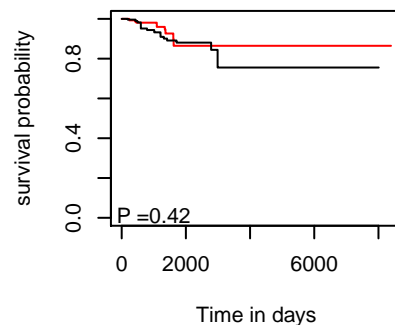

**DSS hsa-mir-15a**

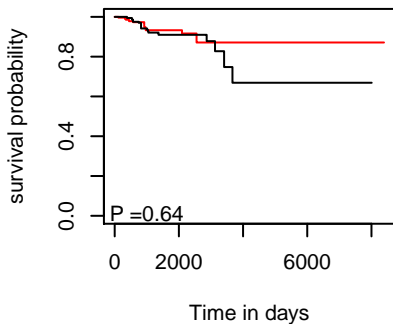

**OS hsa-mir-16-1**

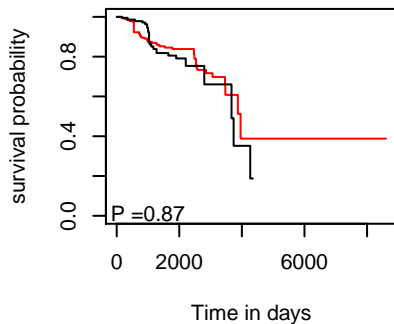

**PFI hsa-mir-16-1**

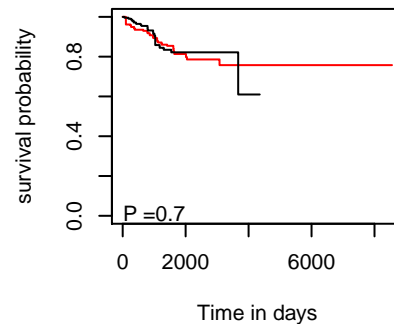

**DFI hsa-mir-16-1**

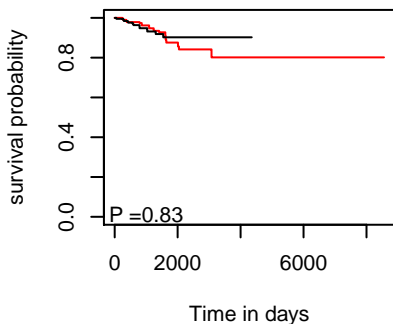

**DSS hsa-mir-16-1**

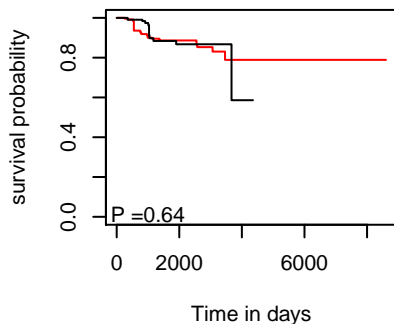

**OS hsa-mir-411**

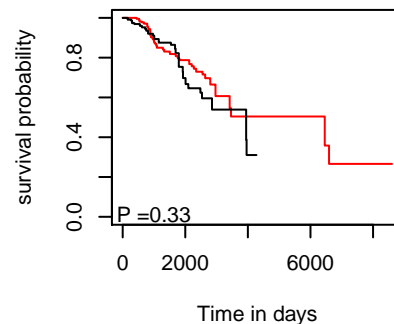

**PFI hsa-mir-411**

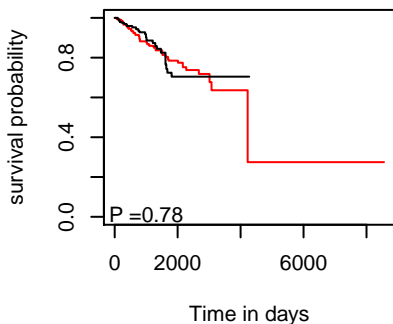

**DFI hsa-mir-411**

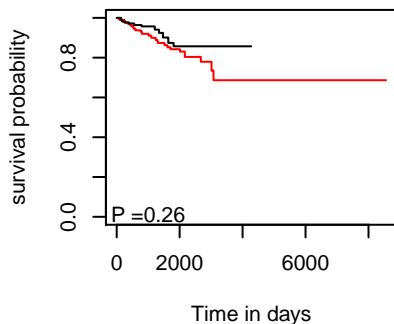

**DSS hsa-mir-411**

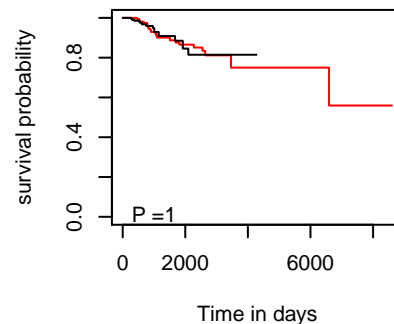

**OS hsa-mir-4454**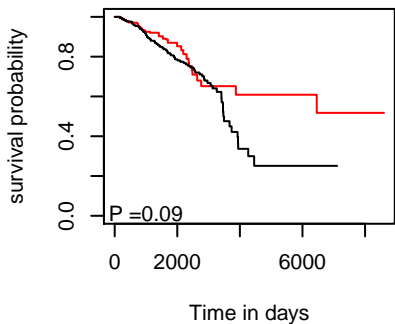**PFI hsa-mir-4454**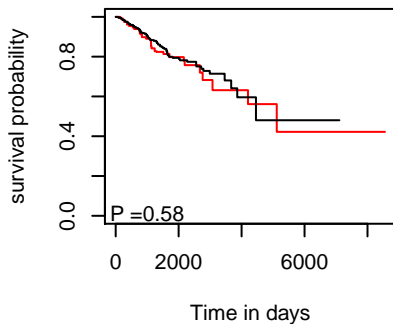**DFI hsa-mir-4454**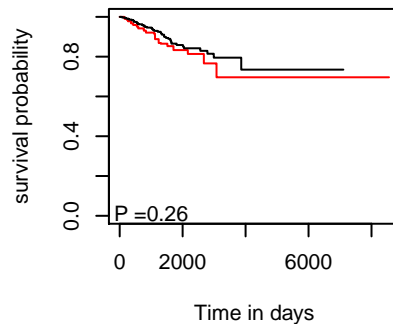**DSS hsa-mir-4454**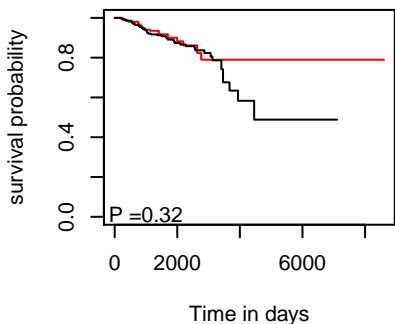**OS hsa-mir-30a**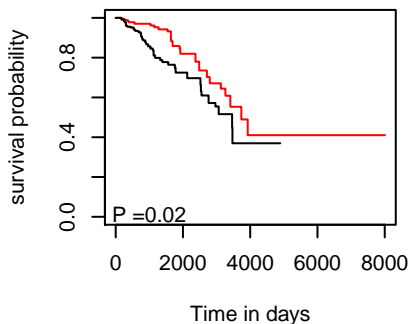**PFI hsa-mir-30a**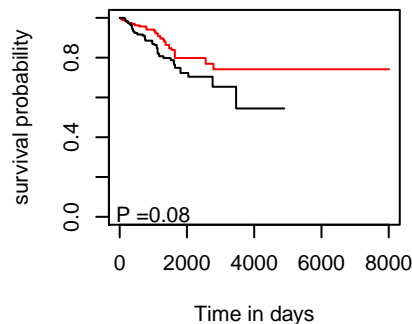**DFI hsa-mir-30a**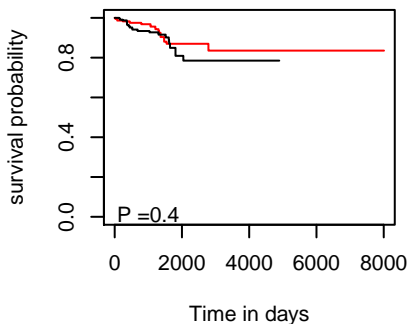**DSS hsa-mir-30a**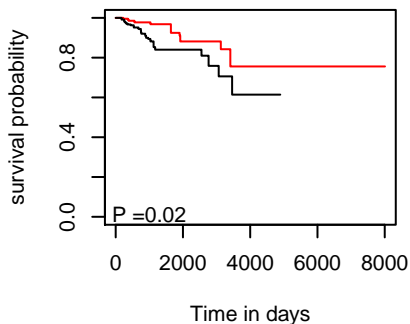**OS hsa-mir-301a**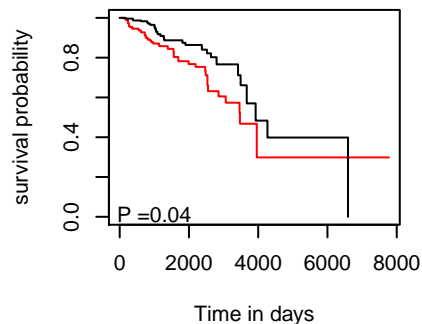

**PFI hsa-mir-301a**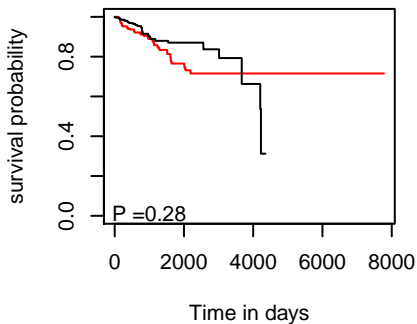**DFI hsa-mir-301a**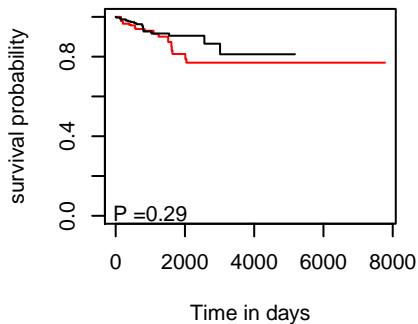**DSS hsa-mir-301a**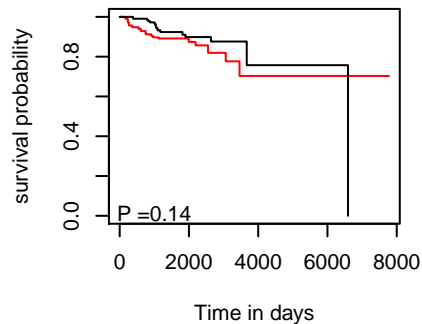**OS hsa-mir-6868**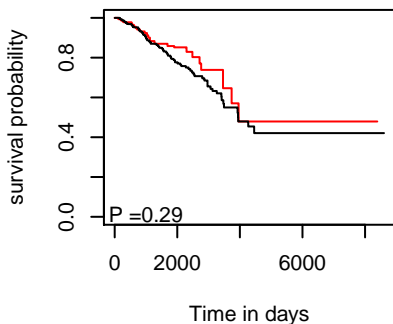**PFI hsa-mir-6868**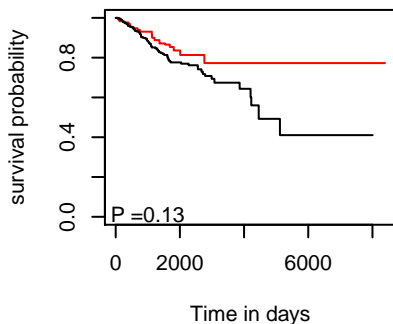**DFI hsa-mir-6868**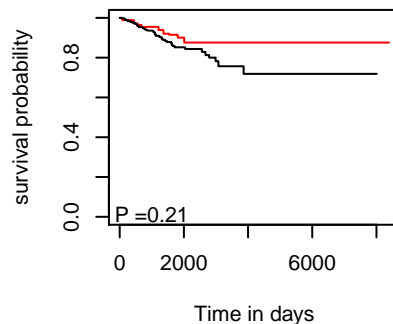**DSS hsa-mir-6868**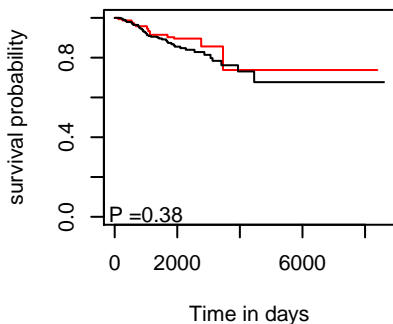**OS hsa-mir-6842**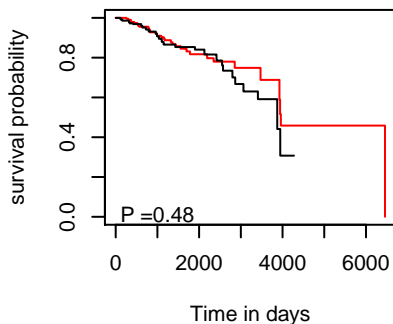**PFI hsa-mir-6842**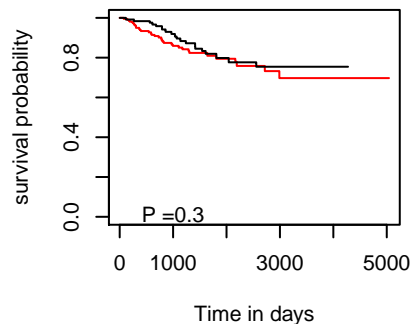



DSS hsa-let-7a-2

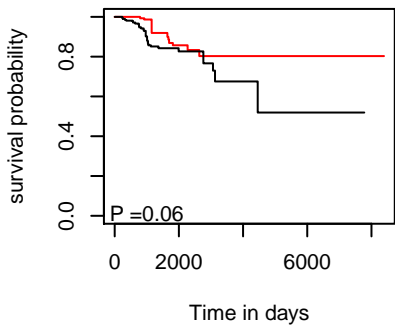

Supplement: MOESM12 [file 41598_2022_7628_MOESM12_ESM.pdf]
