# Supplementary material for: New Thinking on Read-Aloud.
Source: Springer Nature journal article supplement (doi:10.1038/s41598-022-07628-z), 2001-01-01

# Computing microRNA-gene interaction networks in pan-cancer using miRDriver

Banabithi Bose, Matthew Moravec, and Serdar Bozdog

# Supplemental Figure S4

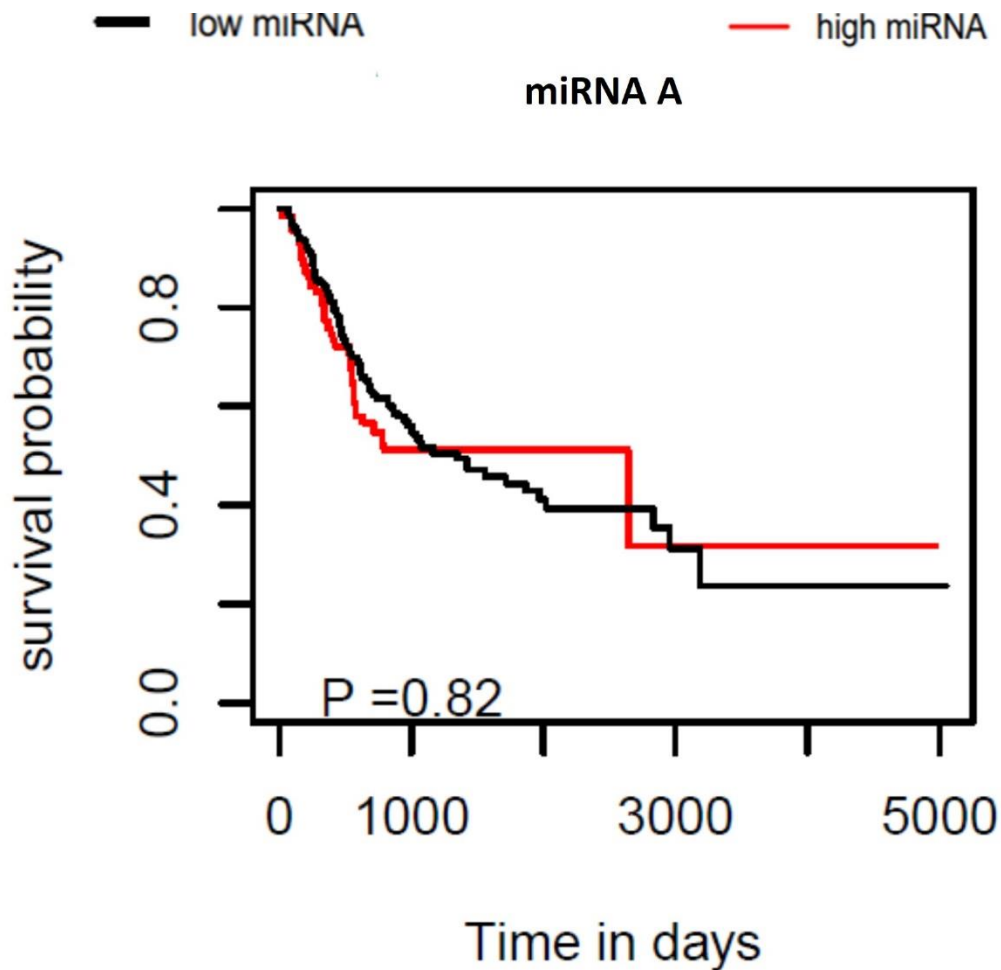

The *Adjusted Kaplan-Meier* survival plots for the computed miRNAs in high and low miRNA expression patient groups.

# Supplemental Figure S4

# Cancer Type: CESC

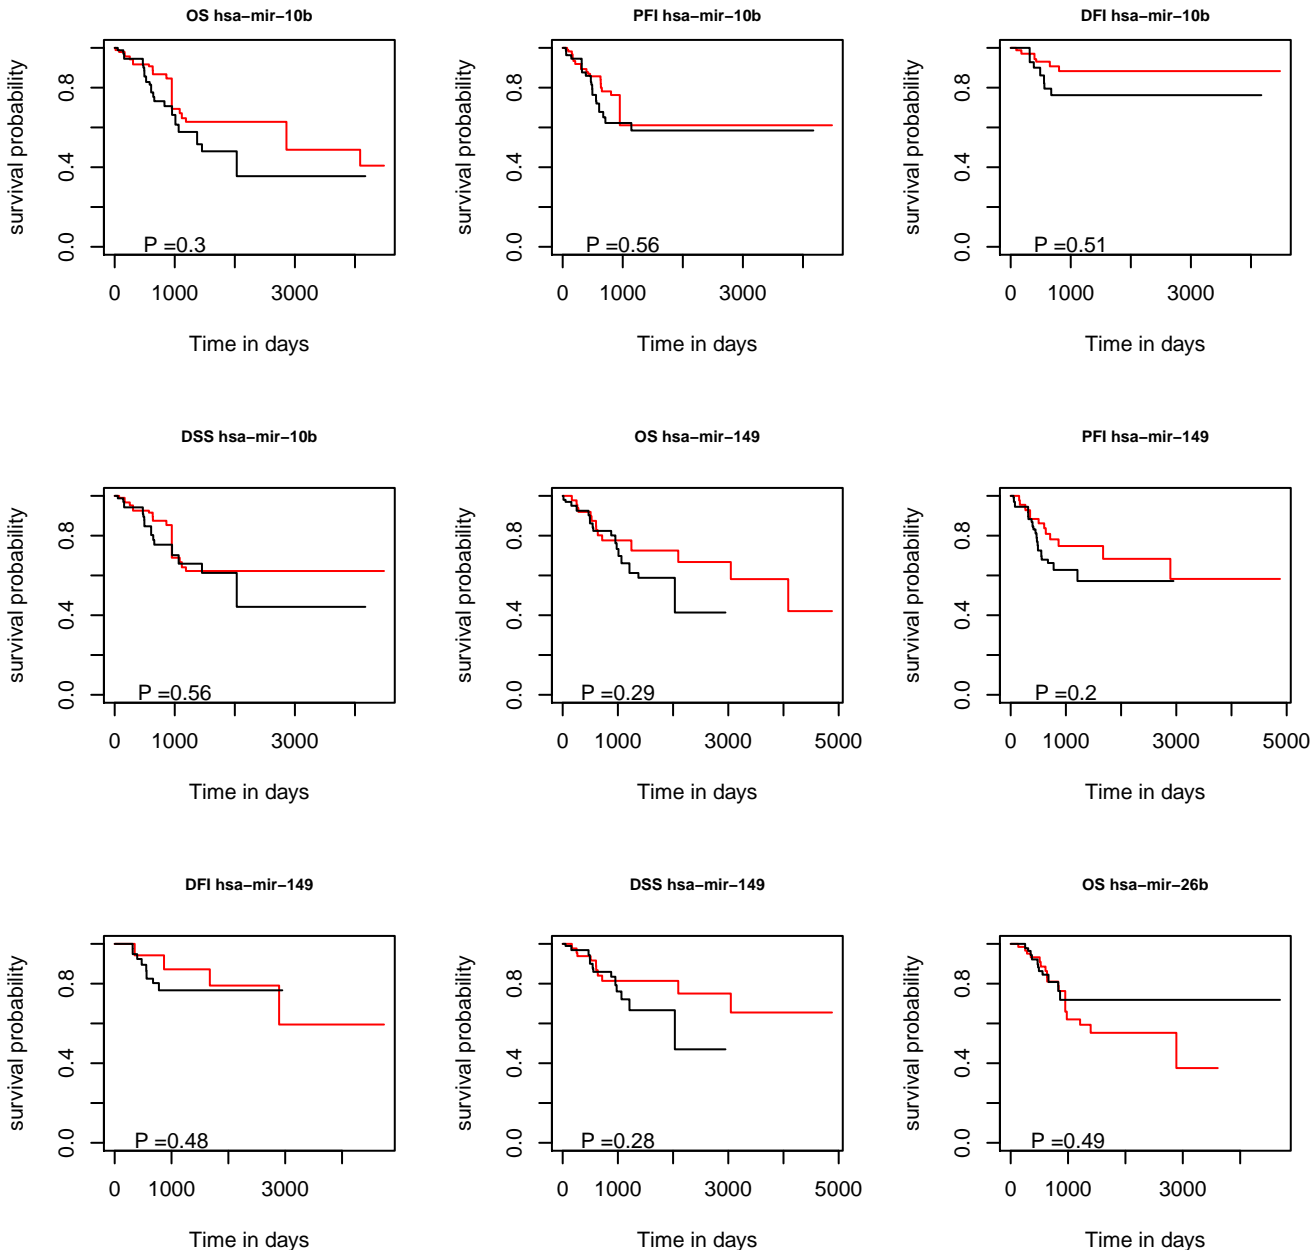

**PFI hsa-mir-26b**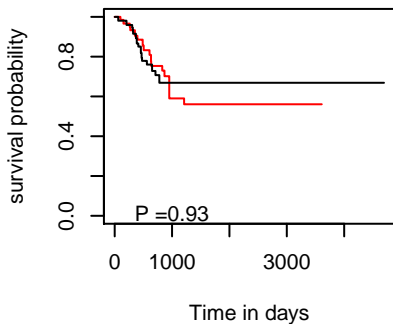**DFI hsa-mir-26b**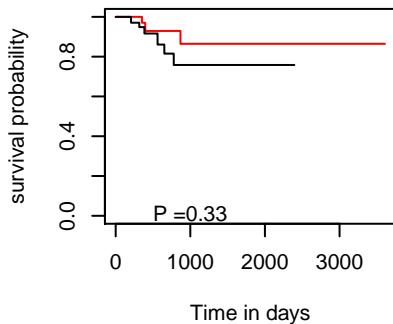**DSS hsa-mir-26b**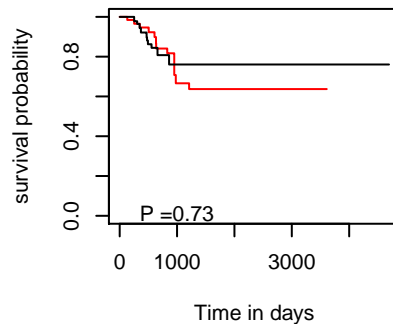**OS hsa-mir-4777**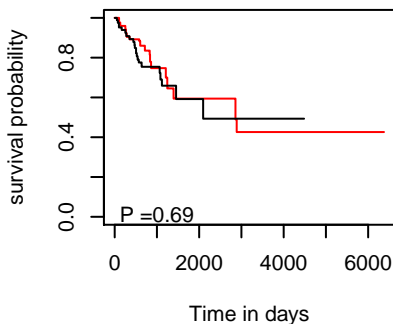**PFI hsa-mir-4777**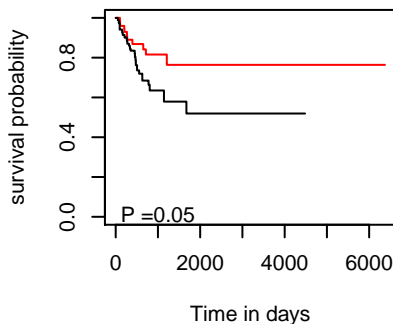**DFI hsa-mir-4777**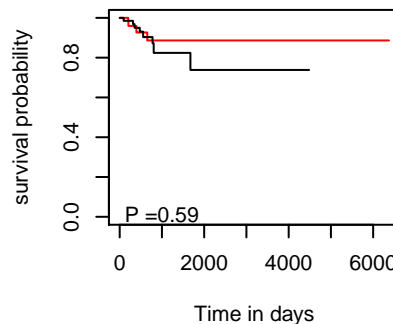**DSS hsa-mir-4777**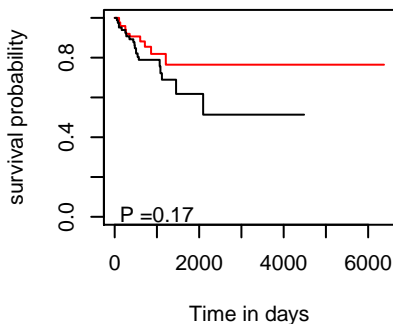**OS hsa-mir-5001**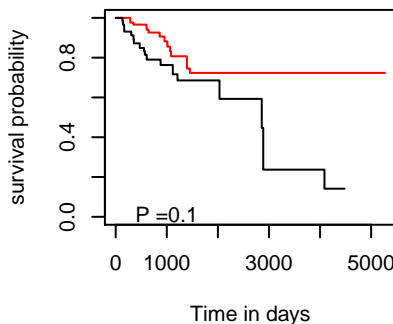**PFI hsa-mir-5001**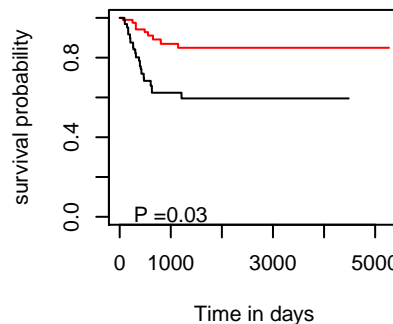

**DFI hsa-mir-5001**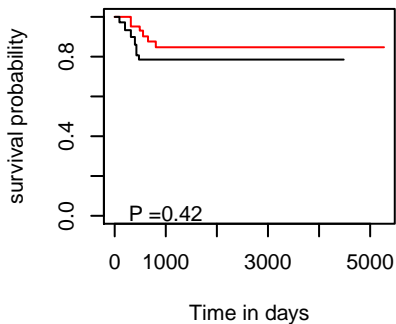**DSS hsa-mir-5001**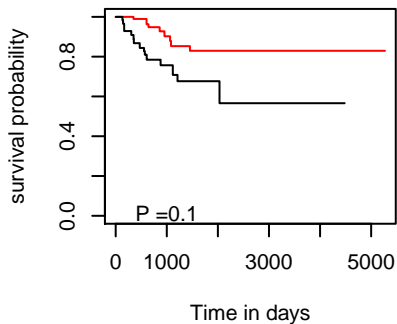**OS hsa-mir-5703**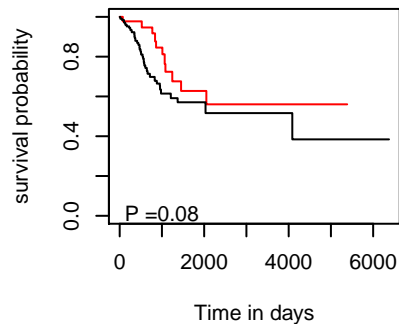**PFI hsa-mir-5703**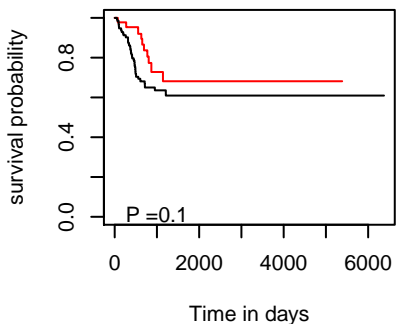**DFI hsa-mir-5703**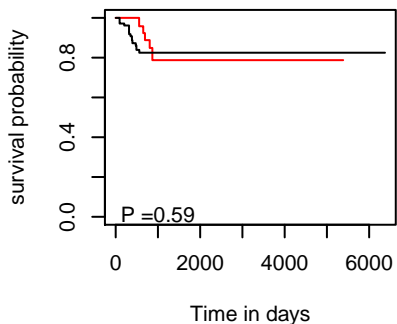**DSS hsa-mir-5703**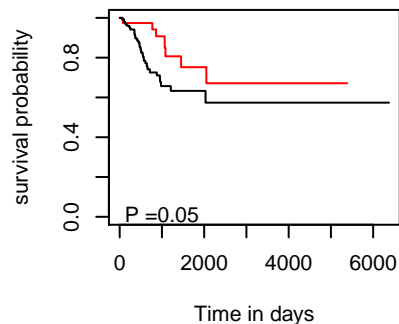**OS hsa-mir-6810**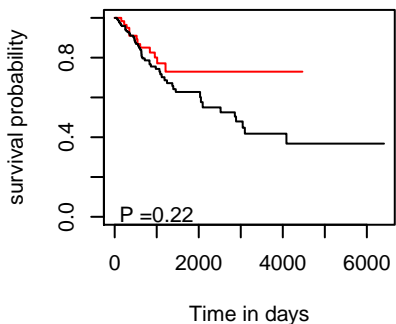**PFI hsa-mir-6810**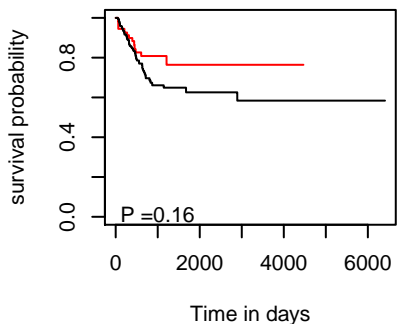**DFI hsa-mir-6810**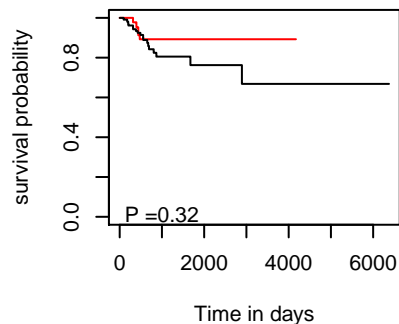

**DSS hsa-mir-6810**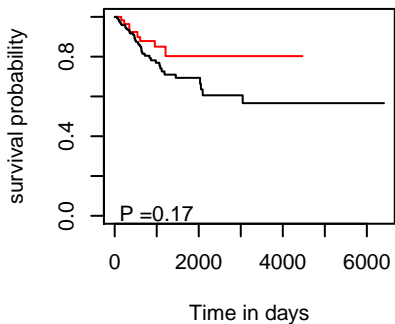**OS hsa-mir-101-2**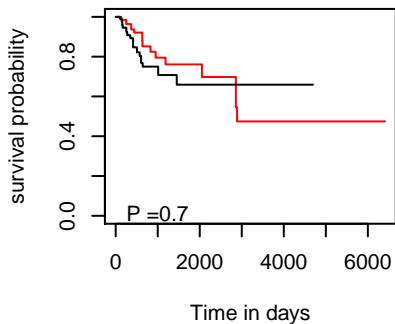**PFI hsa-mir-101-2**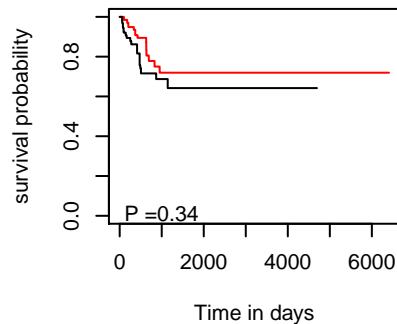**DFI hsa-mir-101-2**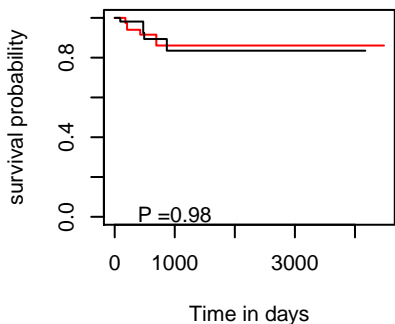**DSS hsa-mir-101-2**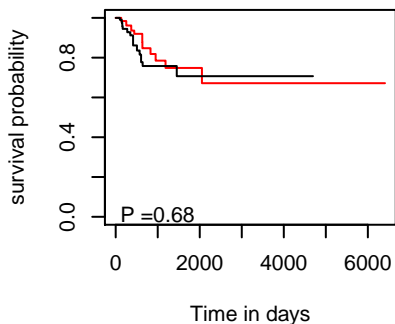**OS hsa-mir-4665**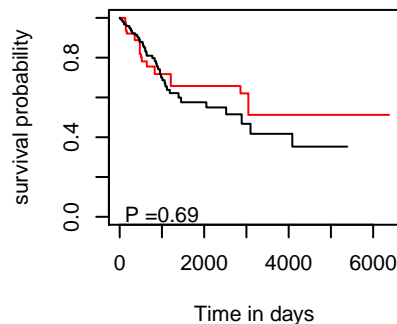**PFI hsa-mir-4665**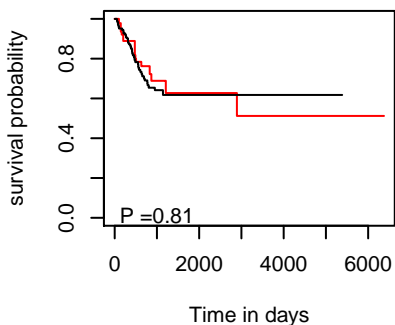**DFI hsa-mir-4665**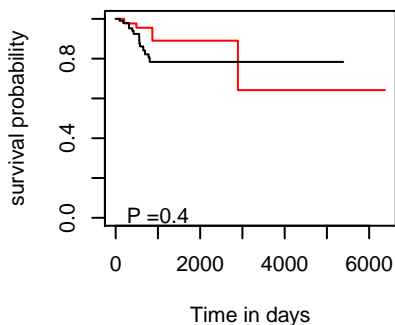**DSS hsa-mir-4665**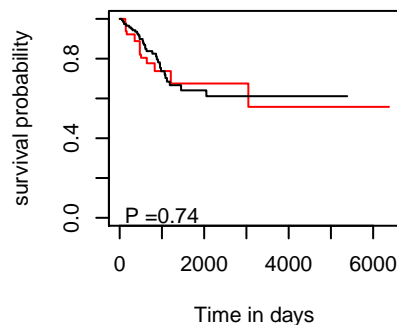

**OS hsa-mir-3667**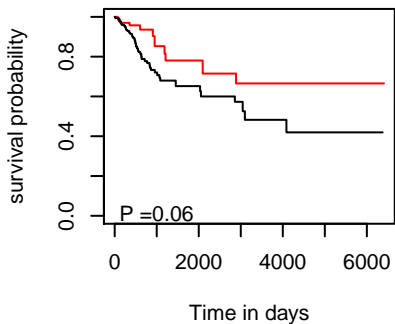**PFI hsa-mir-3667**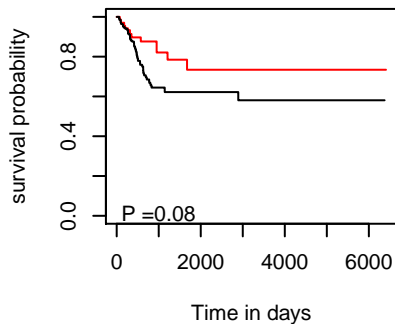**DFI hsa-mir-3667**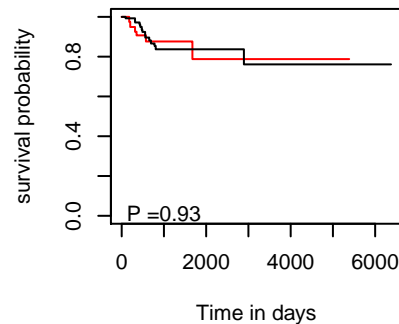**DSS hsa-mir-3667**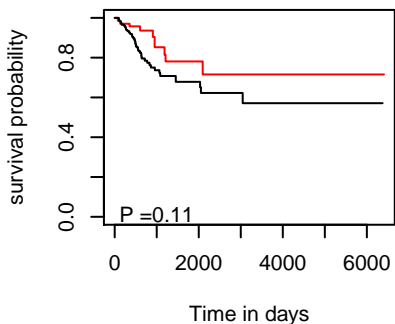**OS hsa-mir-6716**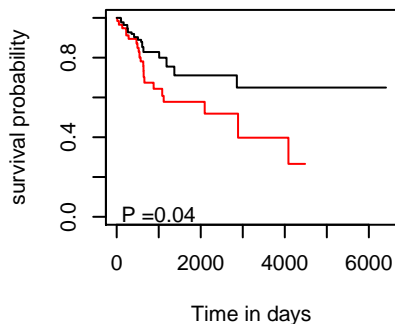**PFI hsa-mir-6716**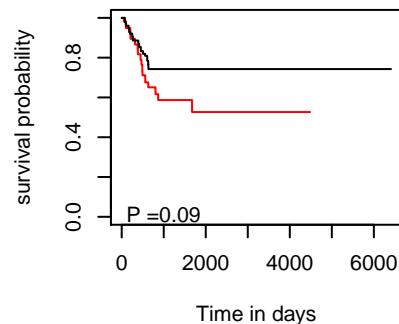**DFI hsa-mir-6716**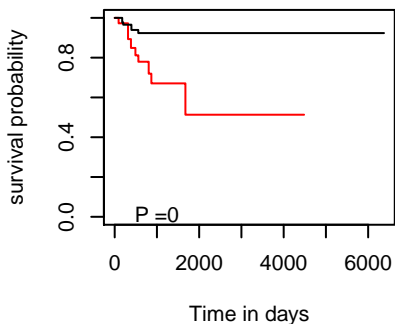**DSS hsa-mir-6716**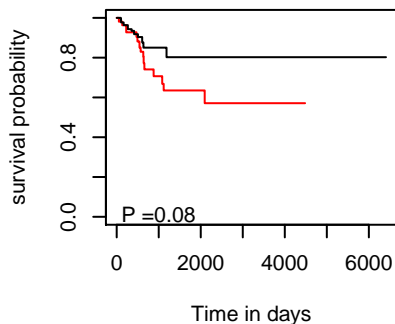**OS hsa-mir-499a**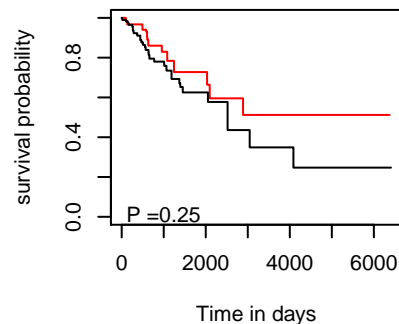

**PFI hsa-mir-499a**

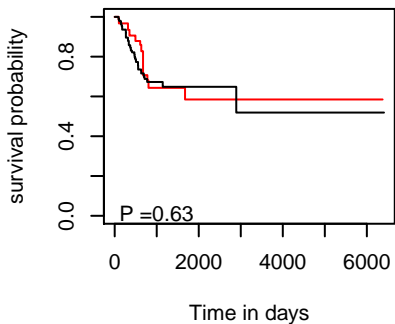

**DFI hsa-mir-499a**

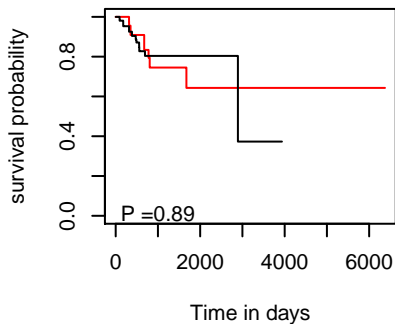

**DSS hsa-mir-499a**

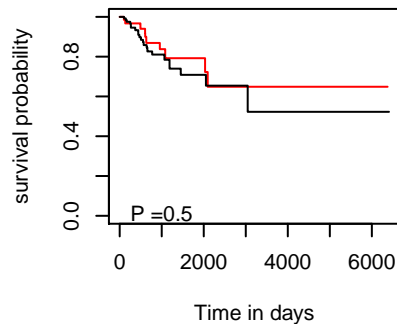

**OS hsa-mir-9-3**

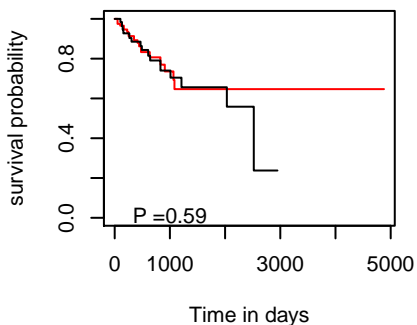

**PFI hsa-mir-9-3**

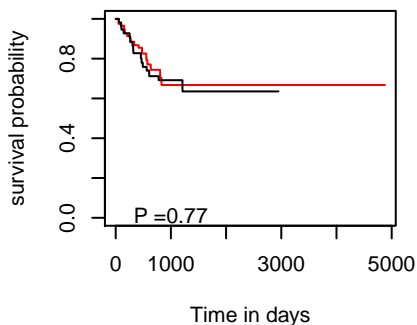

**DFI hsa-mir-9-3**

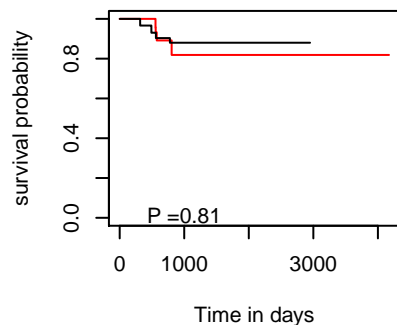

**DSS hsa-mir-9-3**

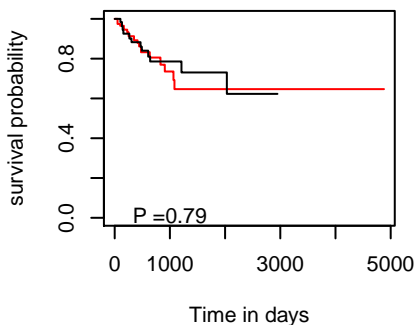

**OS hsa-mir-375**

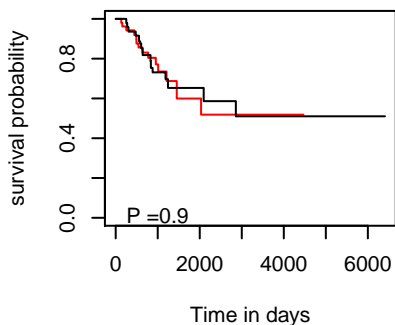

**PFI hsa-mir-375**

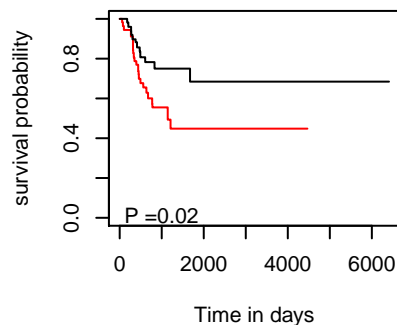

**DFI hsa-mir-375**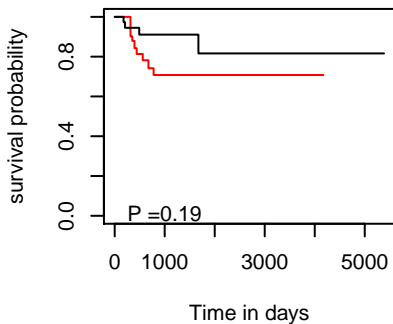**DSS hsa-mir-375**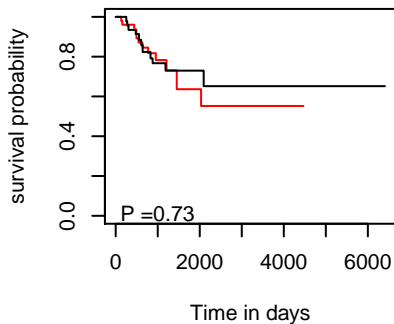**OS hsa-mir-4775**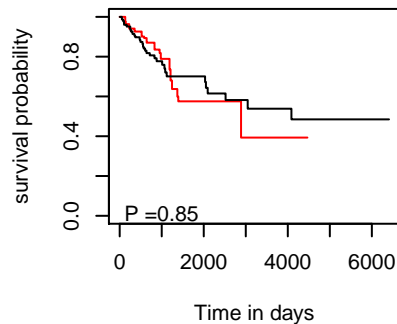**PFI hsa-mir-4775**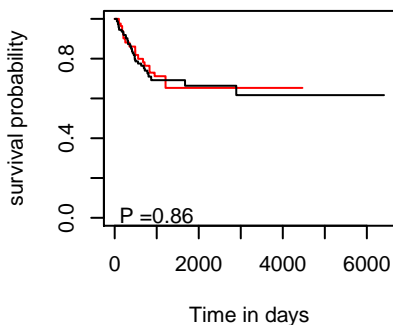**DFI hsa-mir-4775**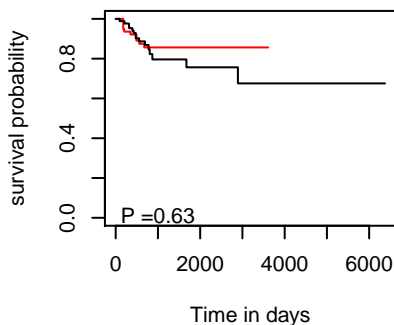**DSS hsa-mir-4775**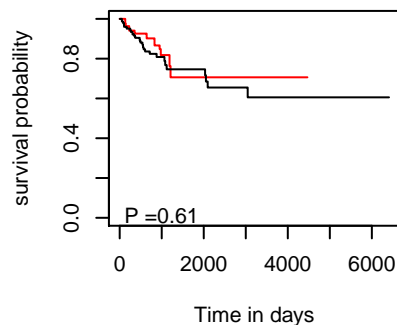**OS hsa-mir-6510**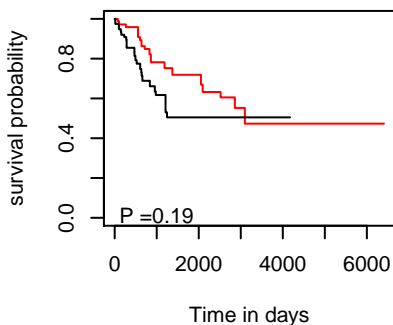**PFI hsa-mir-6510**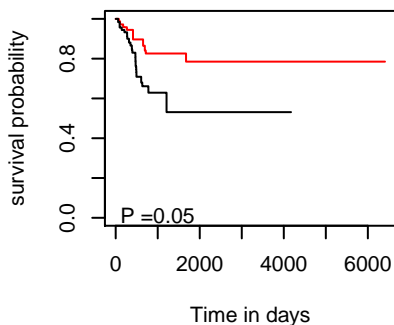**DFI hsa-mir-6510**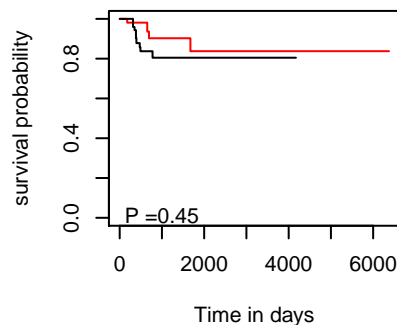

**DSS hsa-mir-6510**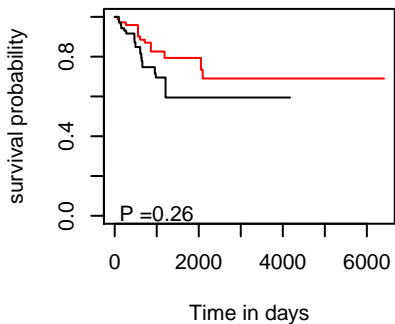**OS hsa-mir-1246**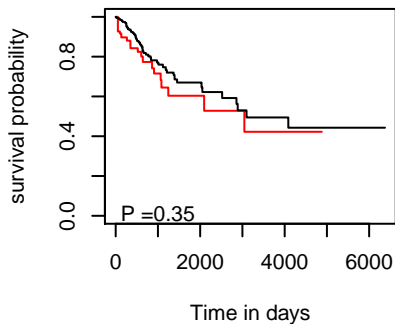**PFI hsa-mir-1246**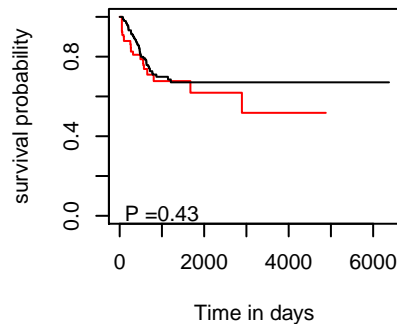**DFI hsa-mir-1246**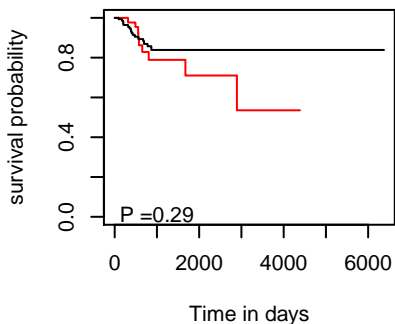**DSS hsa-mir-1246**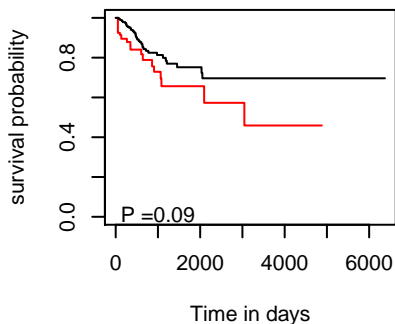**OS hsa-mir-6516**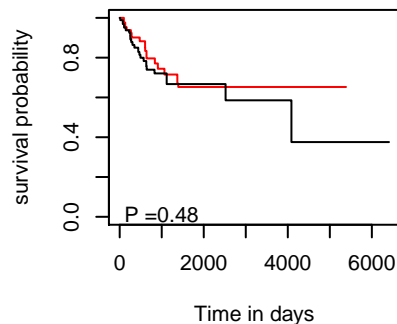**PFI hsa-mir-6516**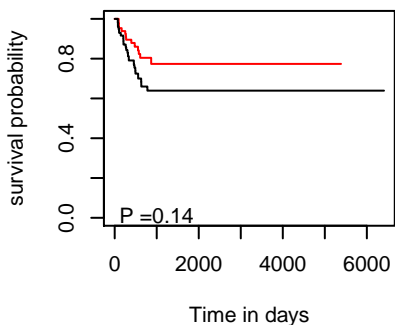**DFI hsa-mir-6516**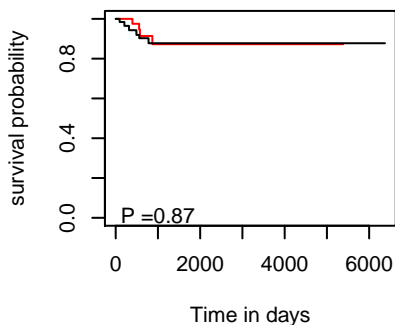**DSS hsa-mir-6516**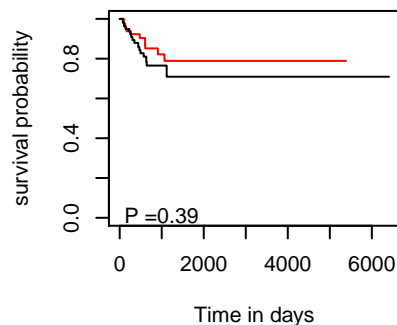

**OS hsa-mir-137**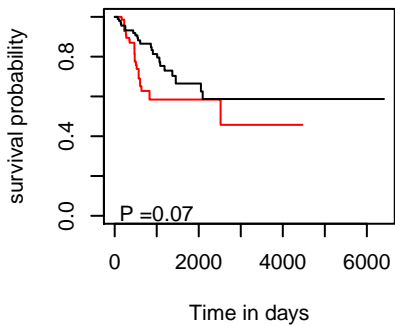**PFI hsa-mir-137**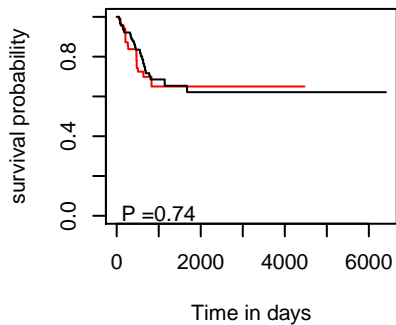**DFI hsa-mir-137**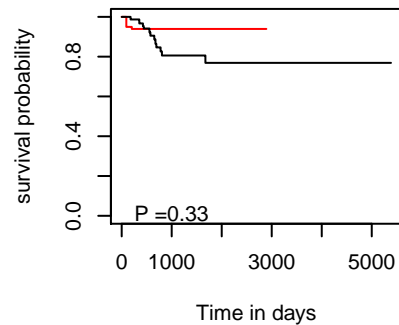**DSS hsa-mir-137**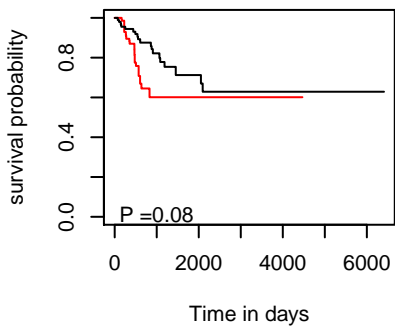**OS hsa-mir-877**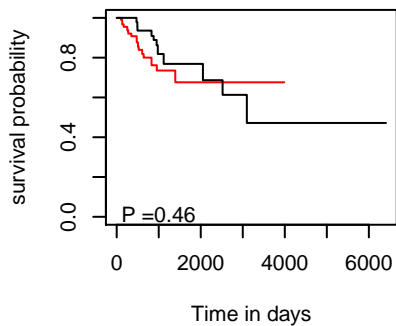**PFI hsa-mir-877**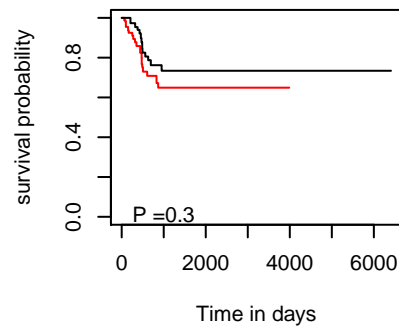**DFI hsa-mir-877**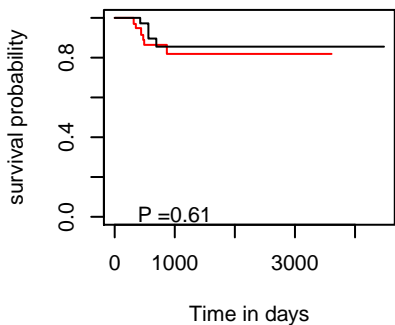**DSS hsa-mir-877**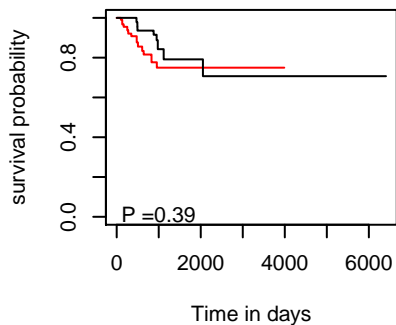**OS hsa-mir-153-1**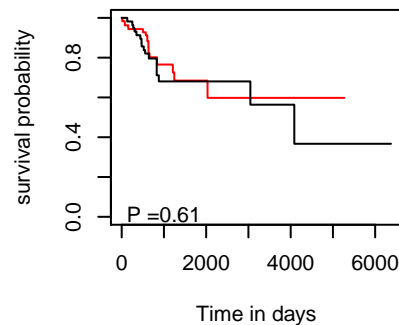

**PFI hsa-mir-153-1**

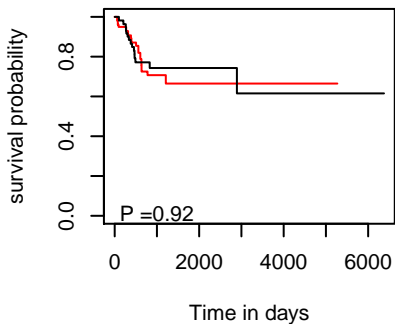

**DFI hsa-mir-153-1**

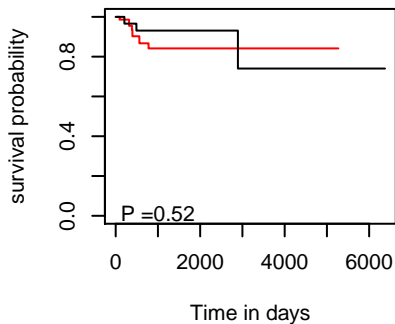

**DSS hsa-mir-153-1**

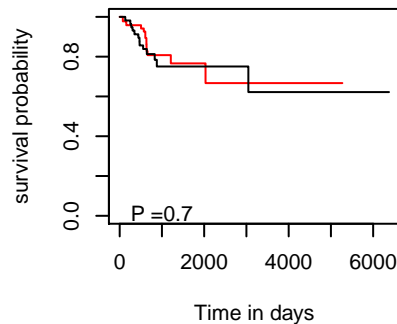

**OS hsa-mir-2355**

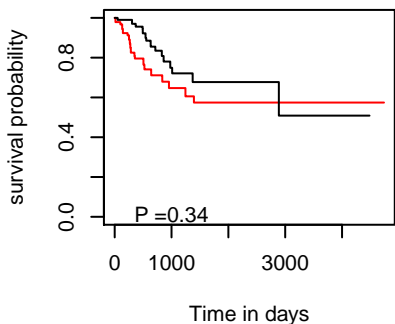

**PFI hsa-mir-2355**

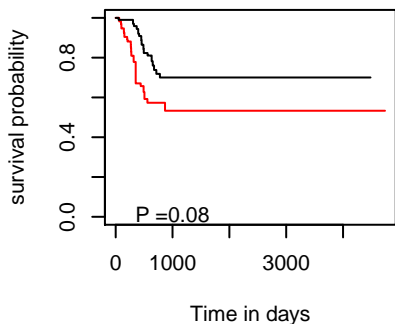

**DFI hsa-mir-2355**

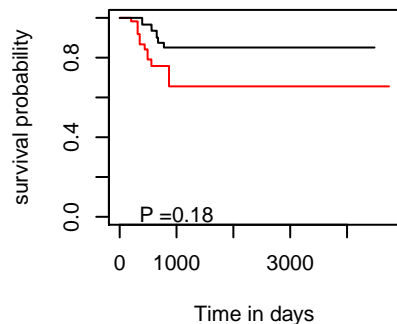

**DSS hsa-mir-2355**

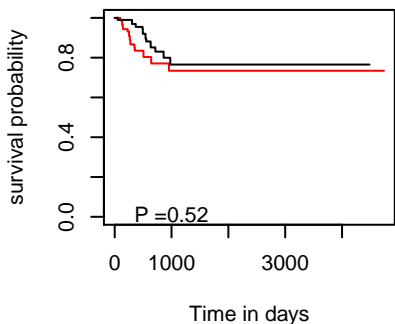

**OS hsa-mir-4491**

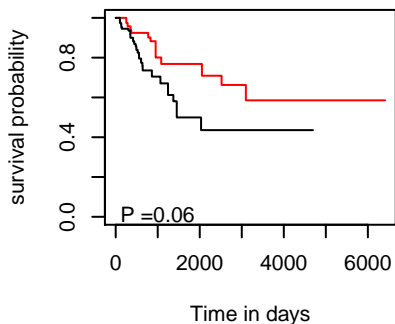

**PFI hsa-mir-4491**

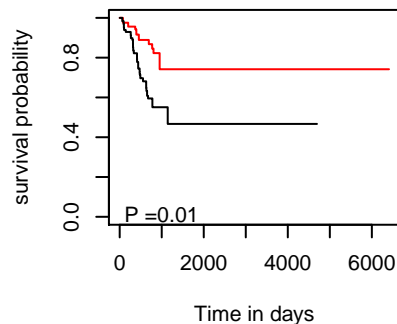

**DFI hsa-mir-4491**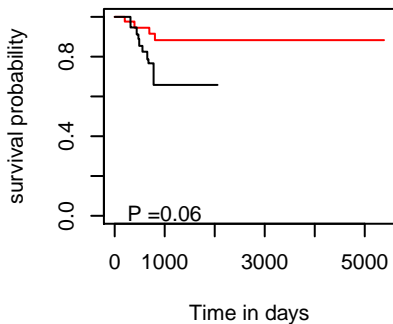**DSS hsa-mir-4491**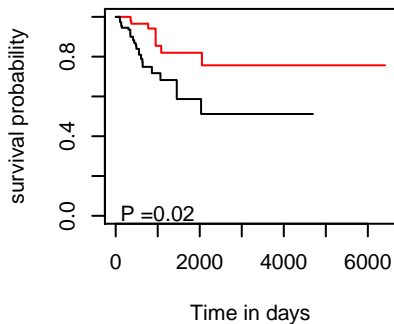**OS hsa-mir-5684**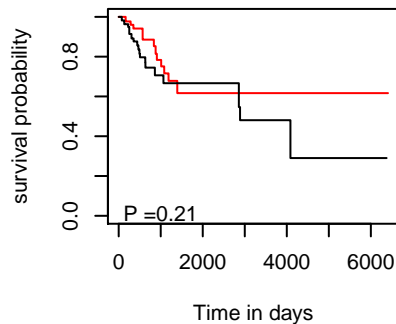**PFI hsa-mir-5684**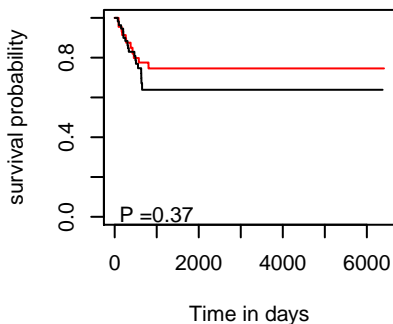**DFI hsa-mir-5684**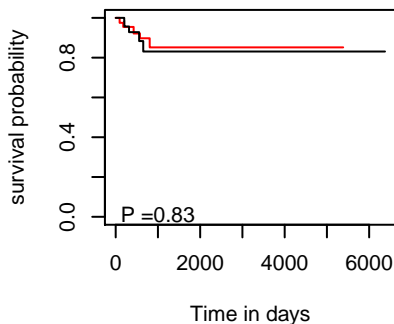**DSS hsa-mir-5684**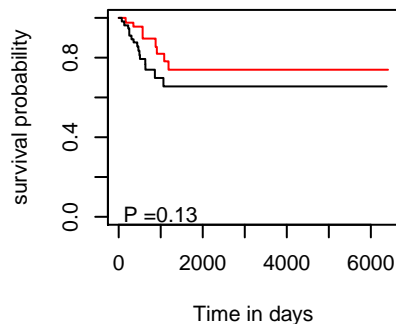**OS hsa-mir-1343**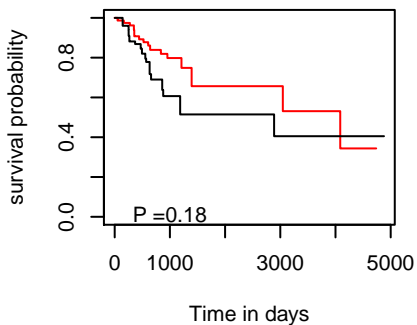**PFI hsa-mir-1343**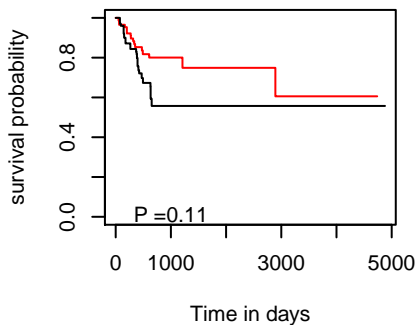**DFI hsa-mir-1343**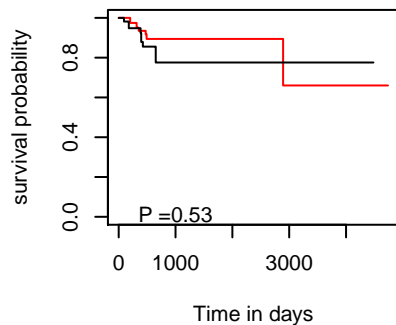

**DSS hsa-mir-1343**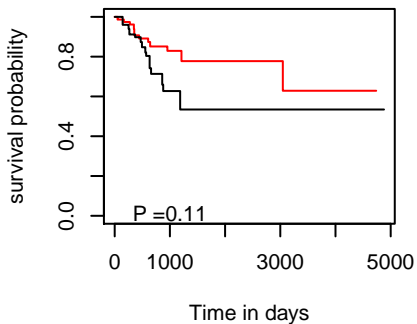**OS hsa-mir-624**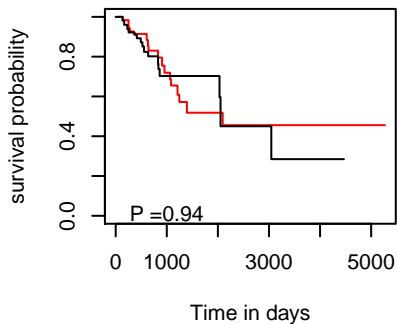**PFI hsa-mir-624**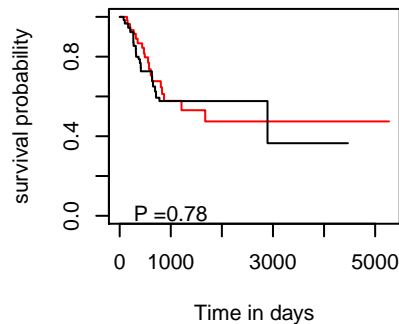**DFI hsa-mir-624**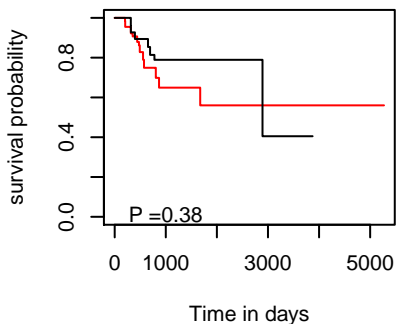**DSS hsa-mir-624**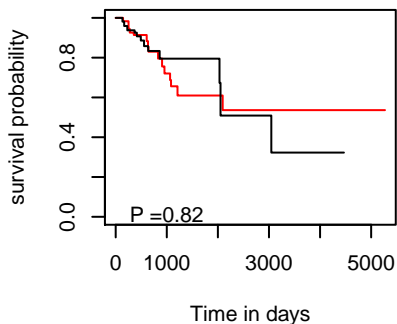**OS hsa-mir-3193**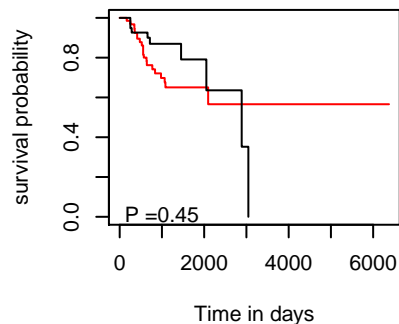**PFI hsa-mir-3193**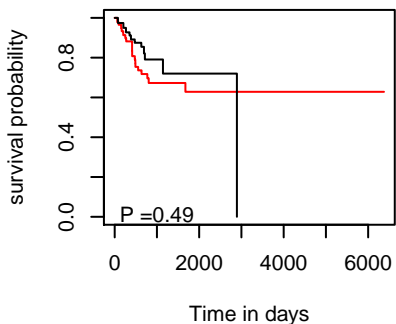**DFI hsa-mir-3193**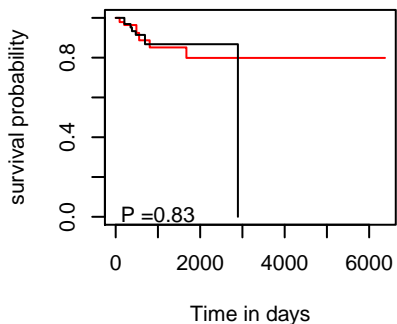**DSS hsa-mir-3193**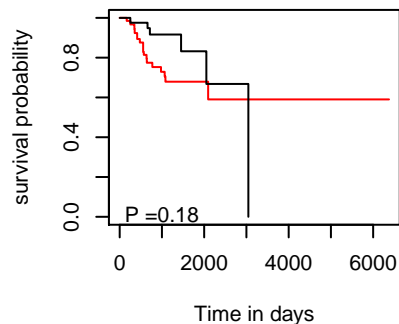

**OS hsa-mir-4466**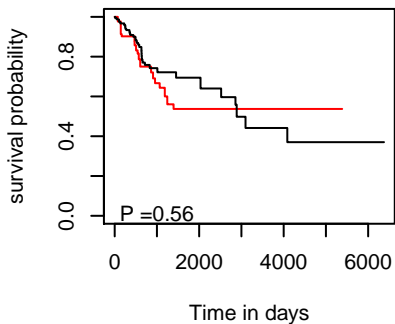**PFI hsa-mir-4466**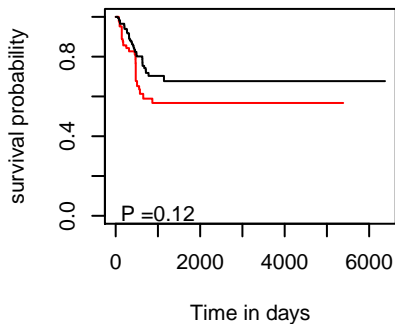**DFI hsa-mir-4466**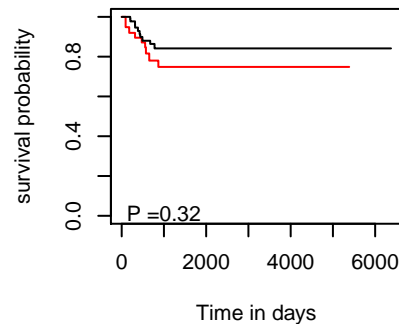**DSS hsa-mir-4466**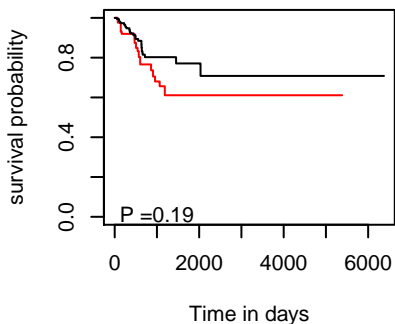**OS hsa-mir-3130-1**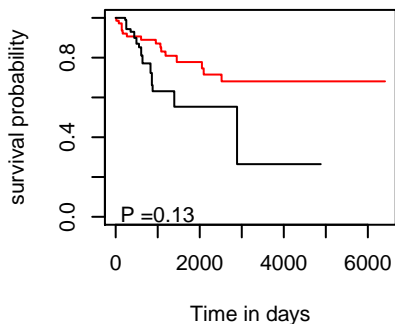**PFI hsa-mir-3130-1**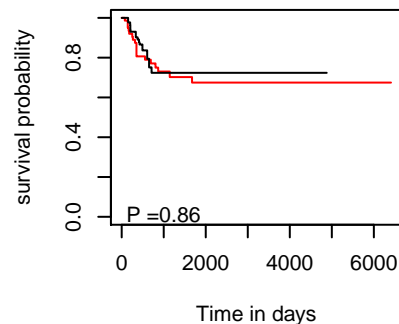**DFI hsa-mir-3130-1**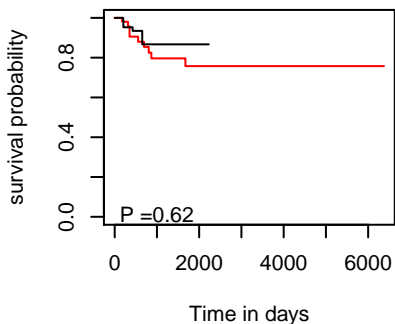**DSS hsa-mir-3130-1**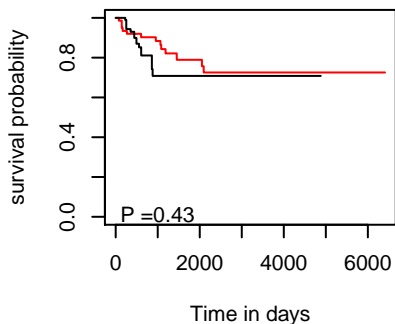**OS hsa-mir-1268b**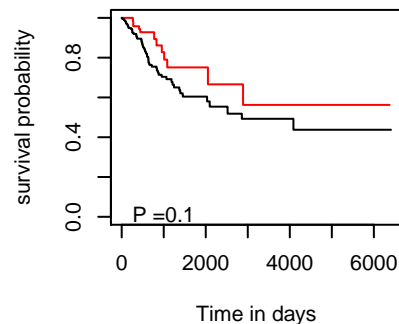



**DFI hsa-mir-4713**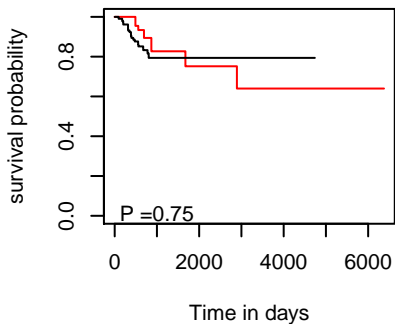**DSS hsa-mir-4713**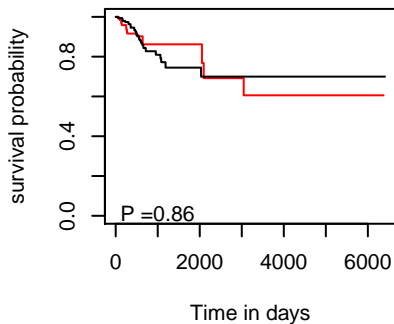**OS hsa-mir-636**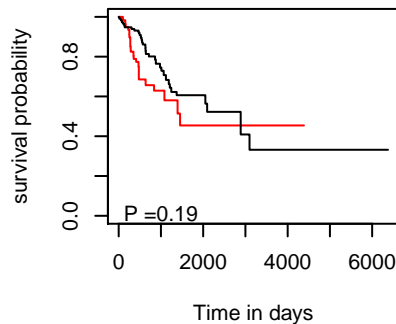**PFI hsa-mir-636**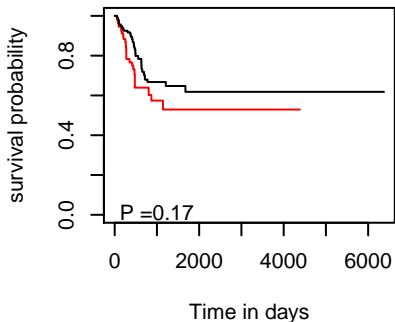**DFI hsa-mir-636**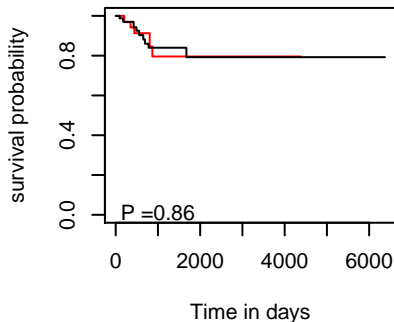**DSS hsa-mir-636**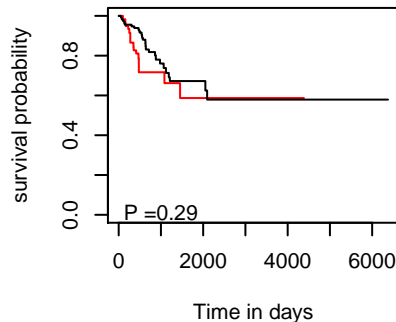**OS hsa-mir-100**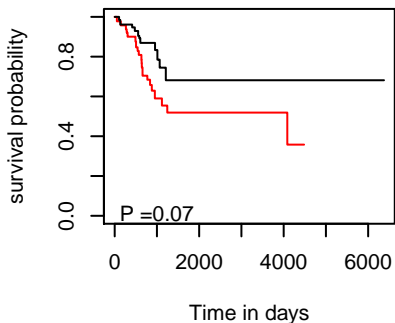**PFI hsa-mir-100**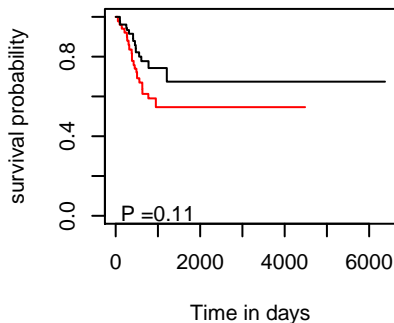**DFI hsa-mir-100**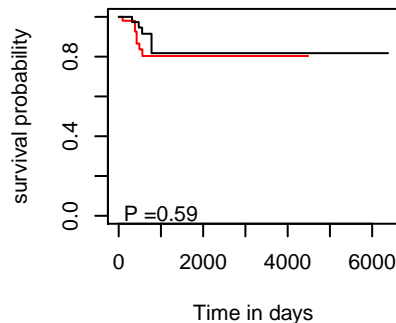

**DSS hsa-mir-100**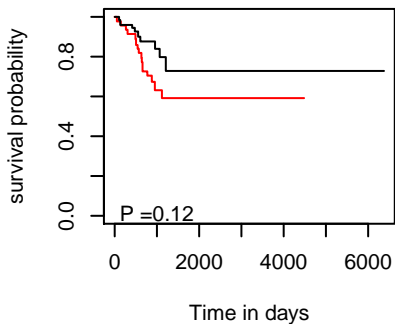**OS hsa-mir-3920**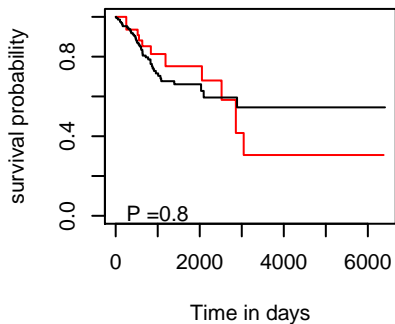**PFI hsa-mir-3920**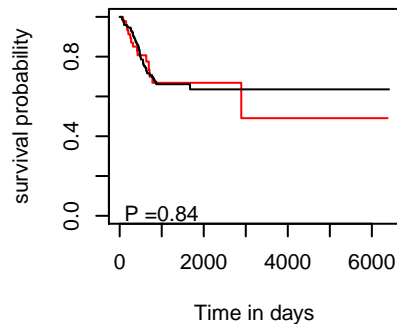**DFI hsa-mir-3920**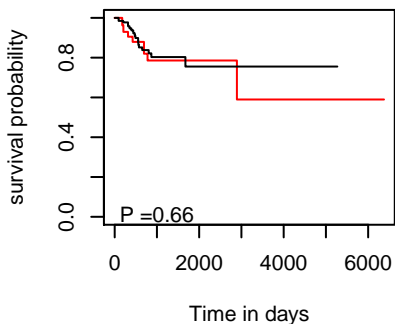**DSS hsa-mir-3920**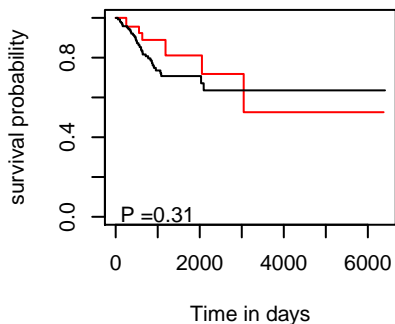**OS hsa-mir-4492**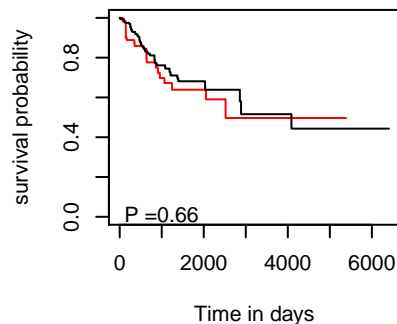**PFI hsa-mir-4492**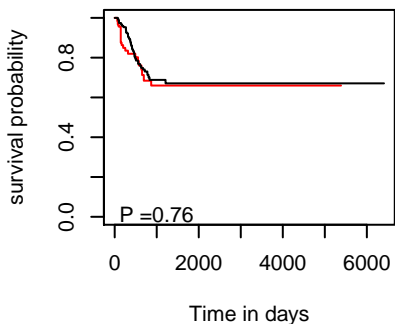**DFI hsa-mir-4492**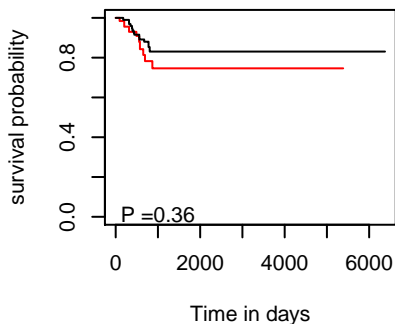**DSS hsa-mir-4492**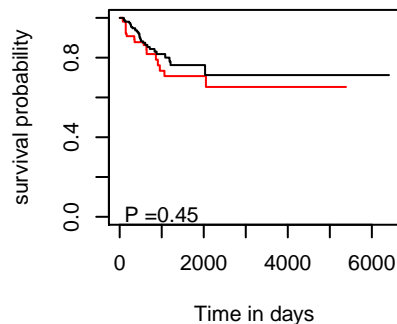

**OS hsa-mir-34b**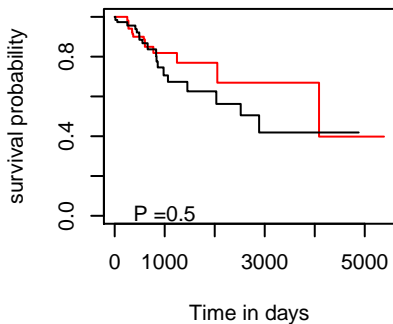**PFI hsa-mir-34b**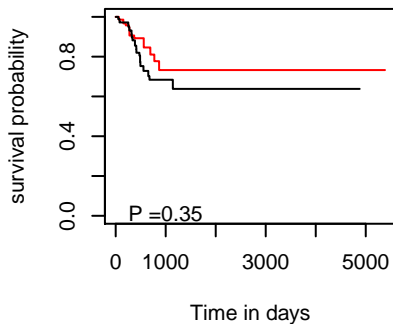**DFI hsa-mir-34b**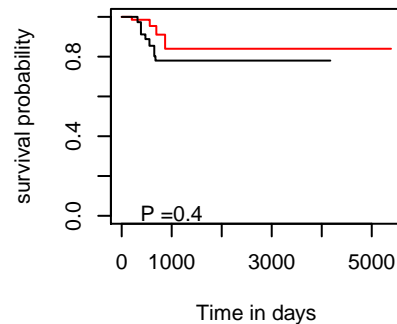**DSS hsa-mir-34b**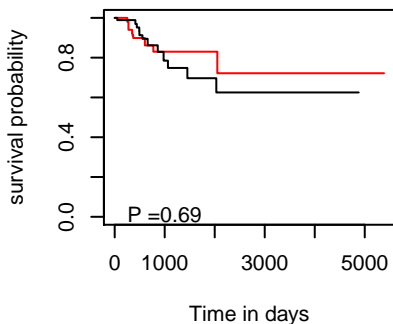**OS hsa-mir-3174**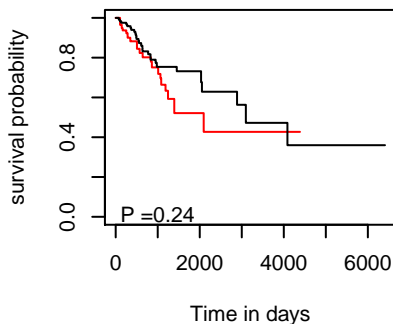**PFI hsa-mir-3174**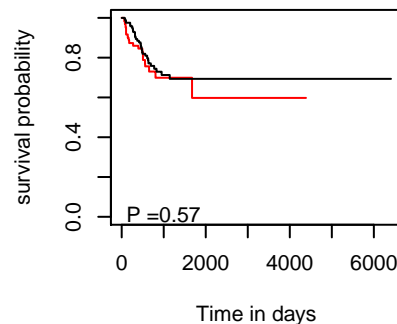**DFI hsa-mir-3174**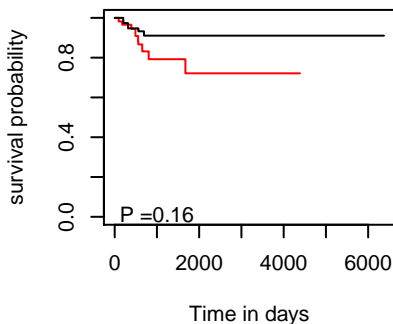**DSS hsa-mir-3174**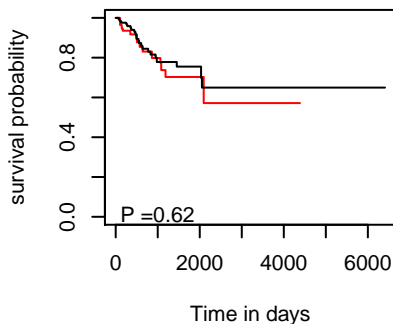**OS hsa-mir-4714**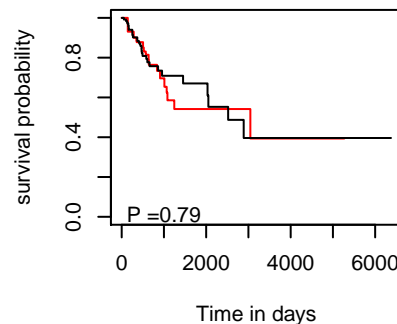

**PFI hsa-mir-4714**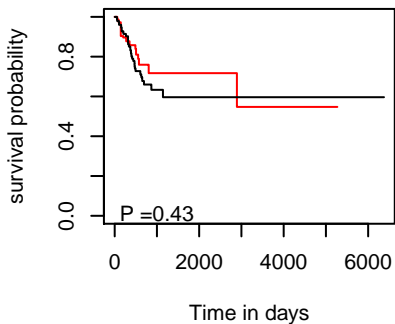**DFI hsa-mir-4714**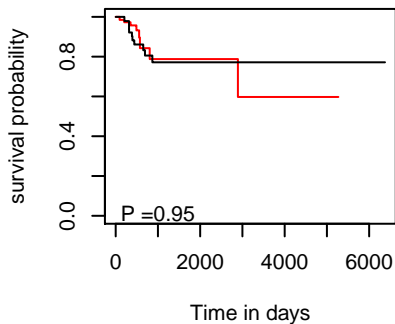**DSS hsa-mir-4714**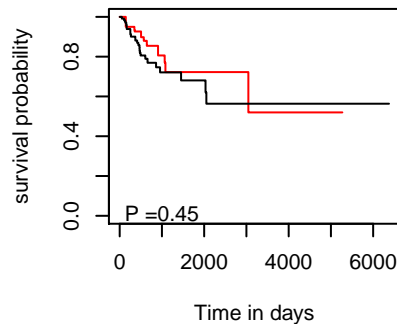**OS hsa-mir-138-2**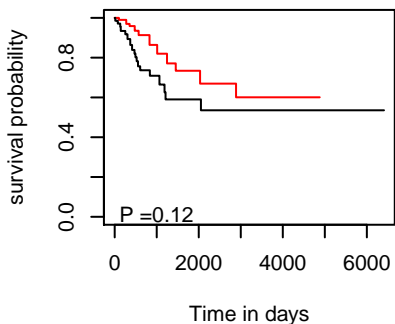**PFI hsa-mir-138-2**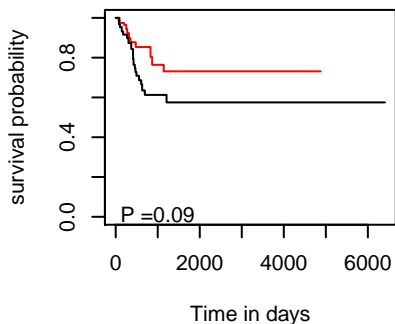**DFI hsa-mir-138-2**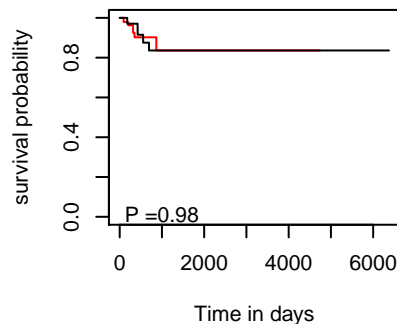**DSS hsa-mir-138-2**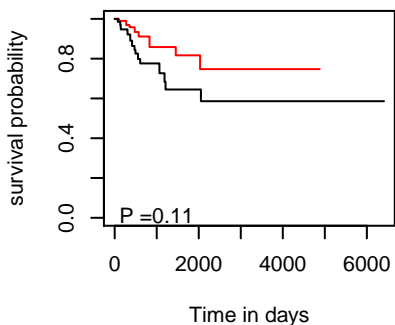**OS hsa-mir-942**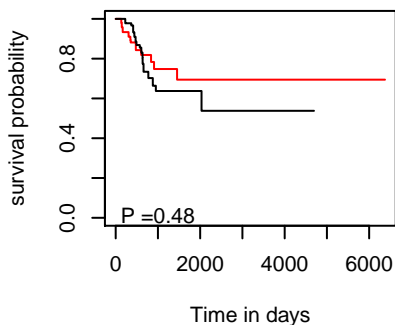**PFI hsa-mir-942**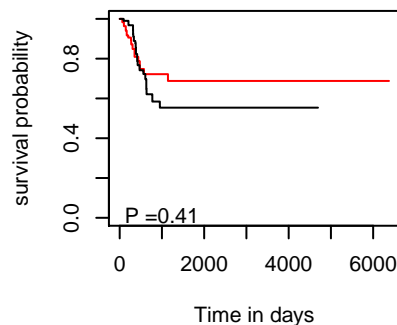

**DFI hsa-mir-942**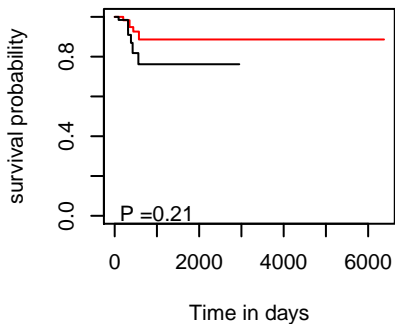**DSS hsa-mir-942**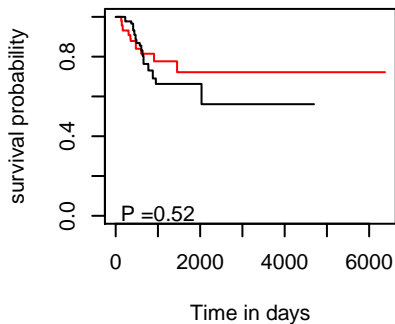**OS hsa-mir-1179**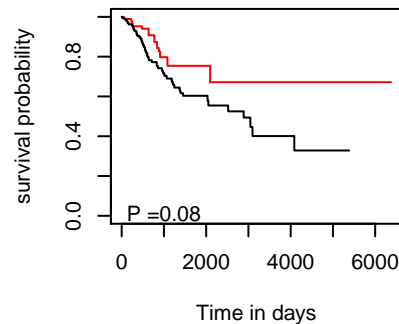**PFI hsa-mir-1179**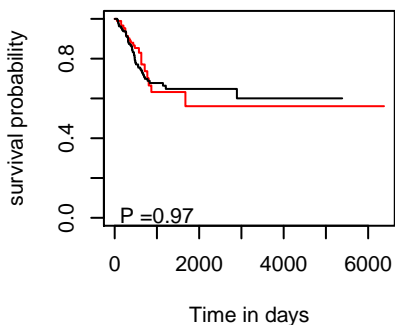**DFI hsa-mir-1179**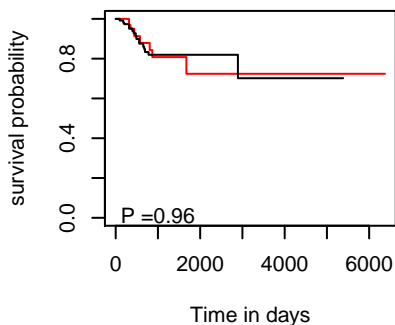**DSS hsa-mir-1179**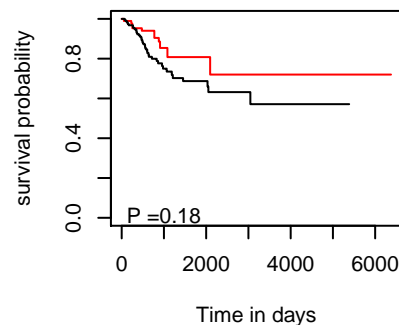**OS hsa-let-7a-2**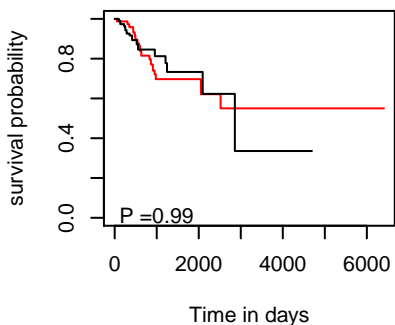**PFI hsa-let-7a-2**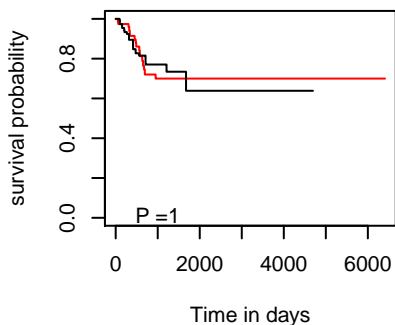**DFI hsa-let-7a-2**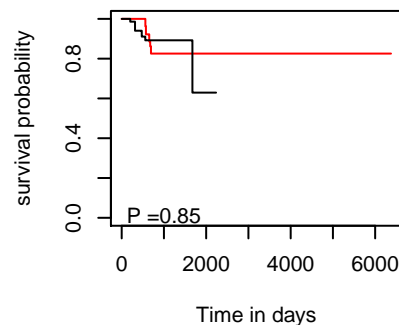

**DSS hsa-let-7a-2**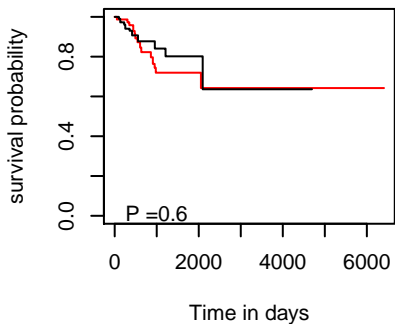**OS hsa-mir-3664**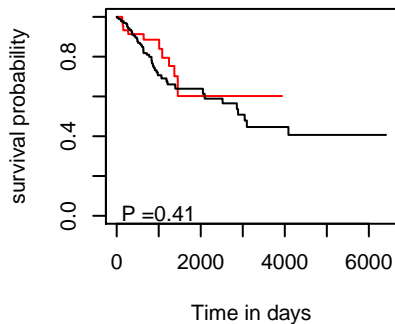**PFI hsa-mir-3664**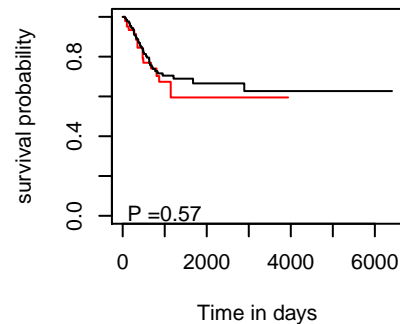**DFI hsa-mir-3664**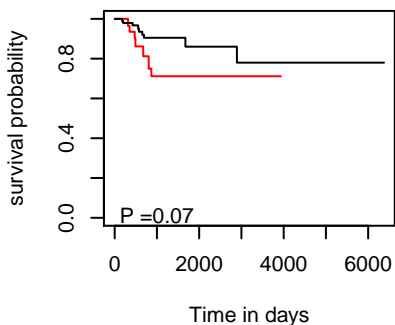**DSS hsa-mir-3664**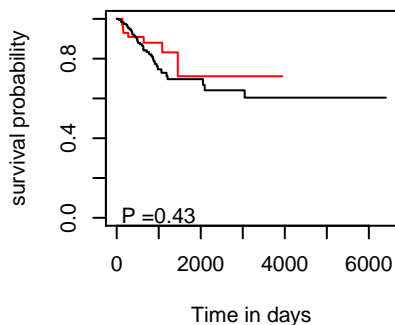**OS hsa-mir-6802**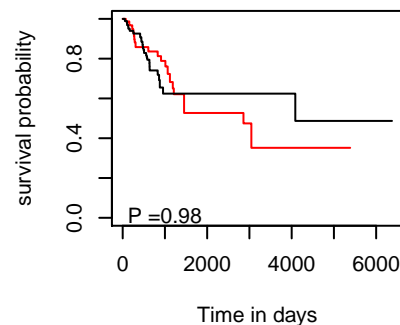**PFI hsa-mir-6802**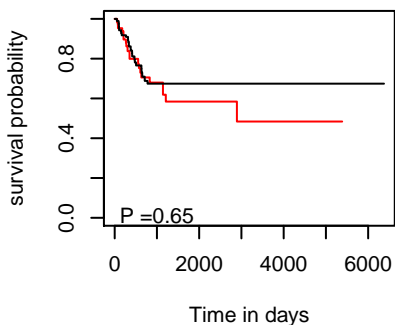**DFI hsa-mir-6802**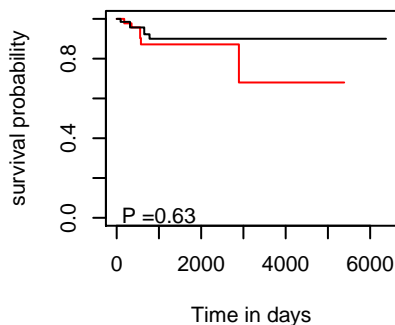**DSS hsa-mir-6802**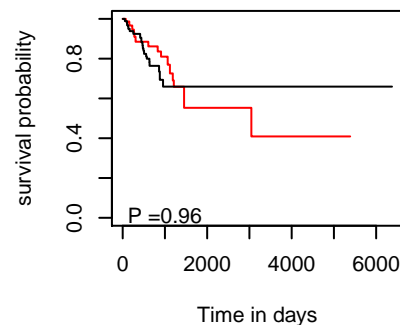

**OS hsa-mir-6868**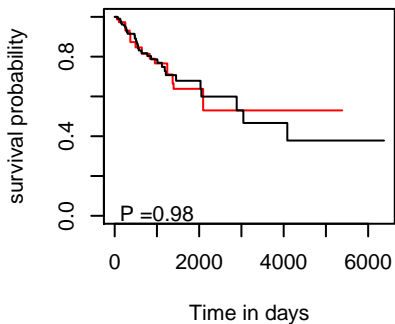**PFI hsa-mir-6868**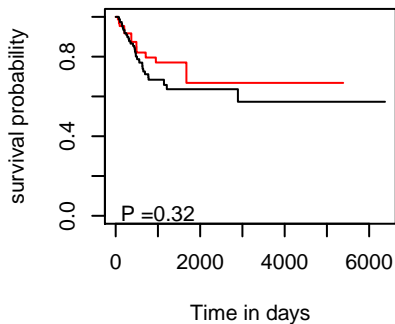**DFI hsa-mir-6868**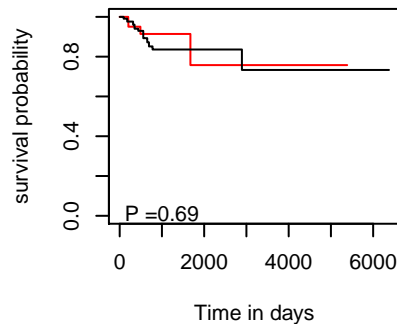**DSS hsa-mir-6868**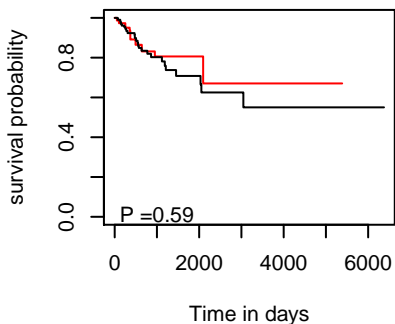**OS hsa-mir-6821**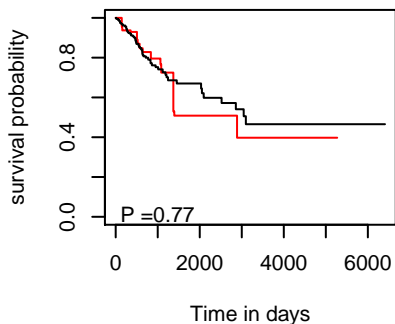**PFI hsa-mir-6821**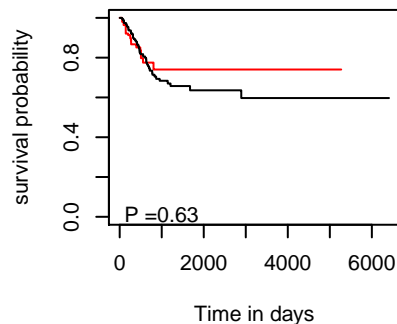**DFI hsa-mir-6821**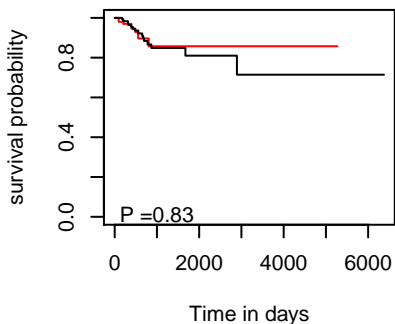**DSS hsa-mir-6821**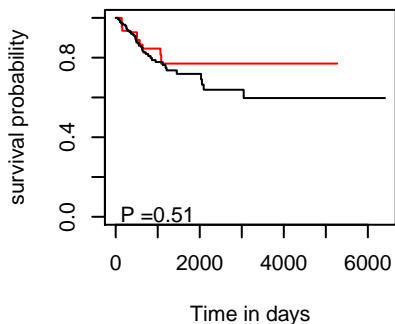**OS hsa-mir-7704**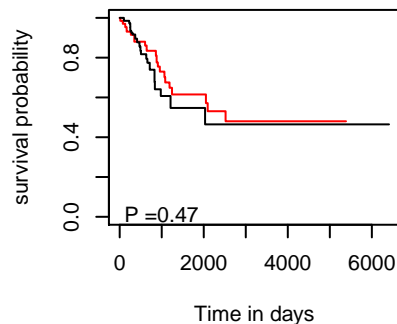

**PFI hsa-mir-7704**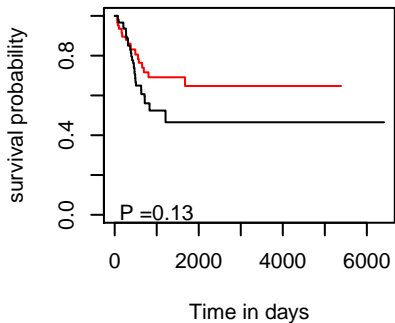**DFI hsa-mir-7704**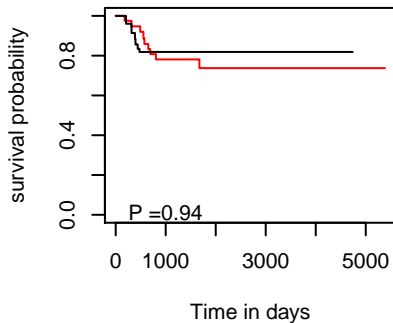**DSS hsa-mir-7704**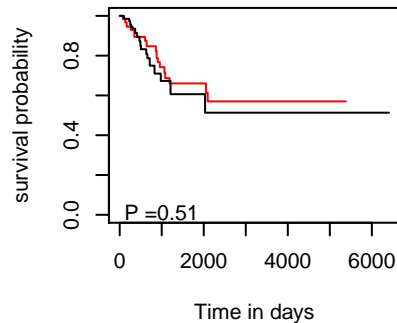**OS hsa-mir-7641-1**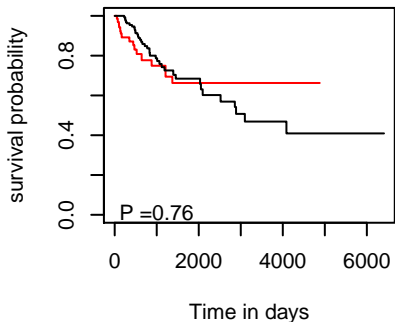**PFI hsa-mir-7641-1**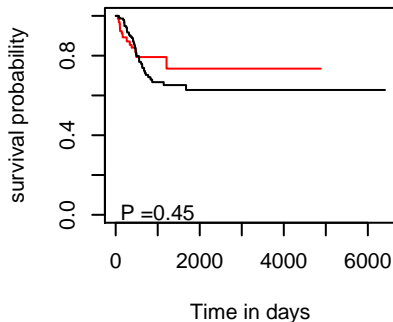**DFI hsa-mir-7641-1**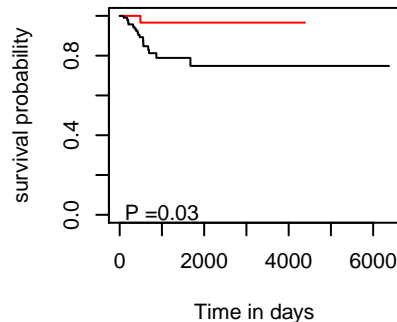**DSS hsa-mir-7641-1**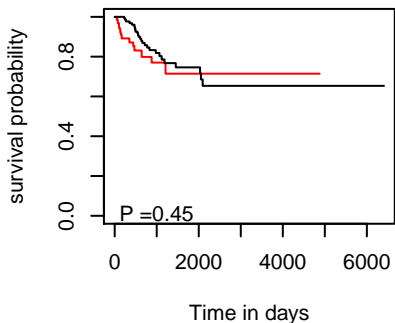**OS hsa-mir-125b-1**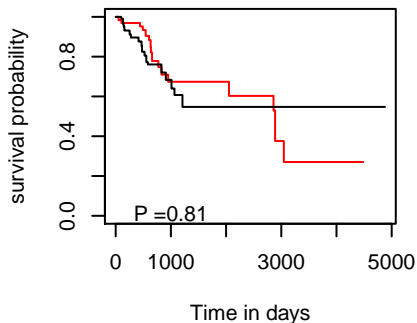**PFI hsa-mir-125b-1**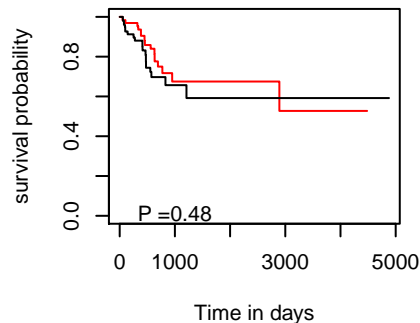

**DFI hsa-mir-125b-1**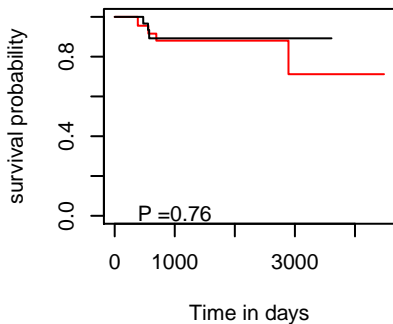**DSS hsa-mir-125b-1**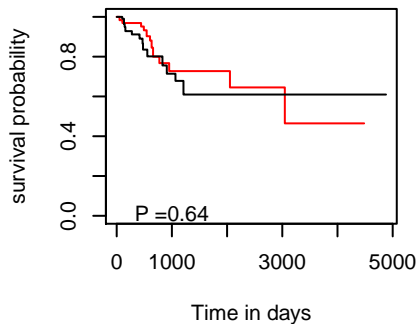**OS hsa-mir-548k**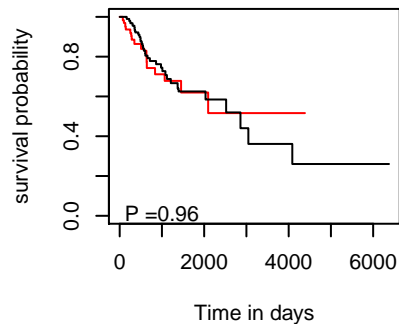**PFI hsa-mir-548k**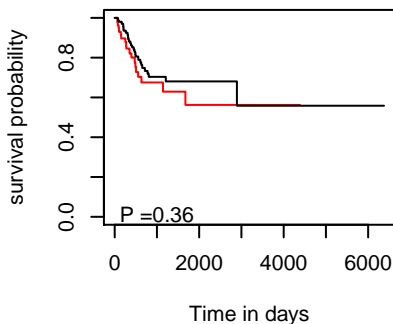**DFI hsa-mir-548k**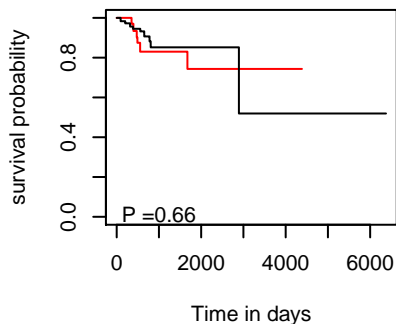**DSS hsa-mir-548k**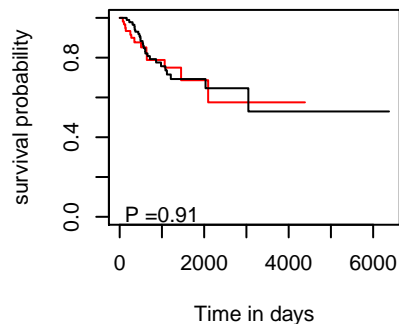**OS hsa-mir-4776-2**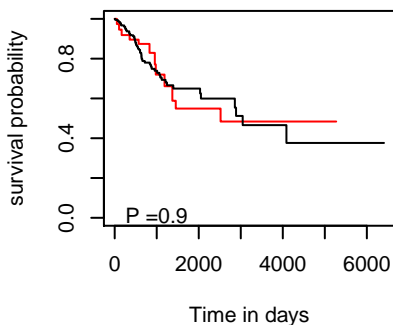**PFI hsa-mir-4776-2**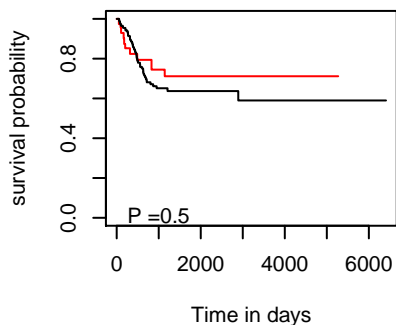**DFI hsa-mir-4776-2**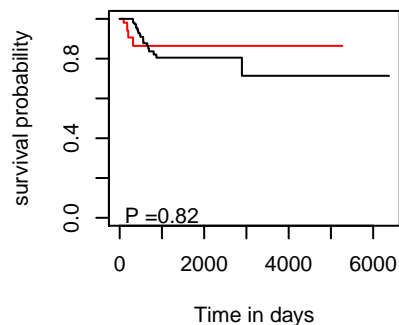

DSS hsa-mir-4776-2

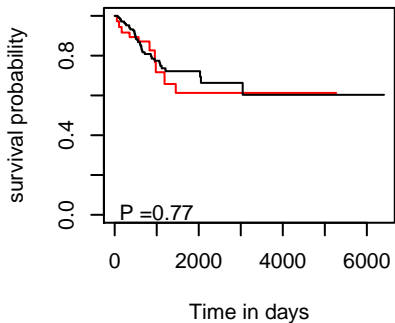

OS hsa-mir-6513

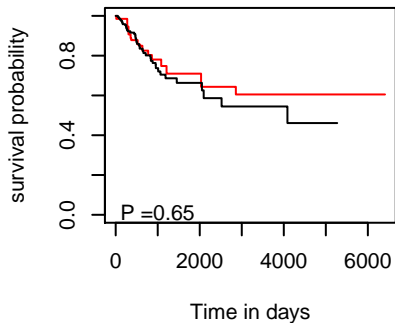

PFI hsa-mir-6513

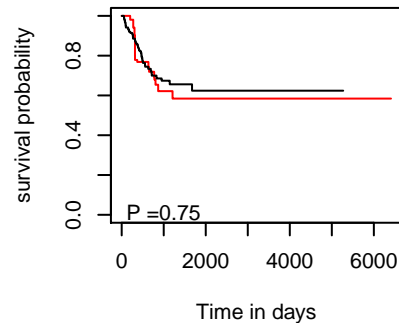

DFI hsa-mir-6513

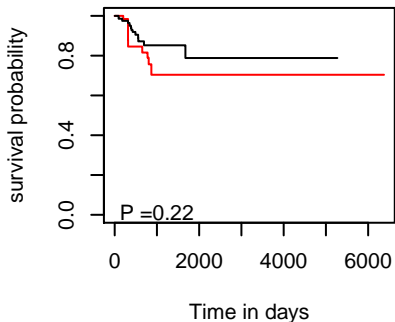

DSS hsa-mir-6513

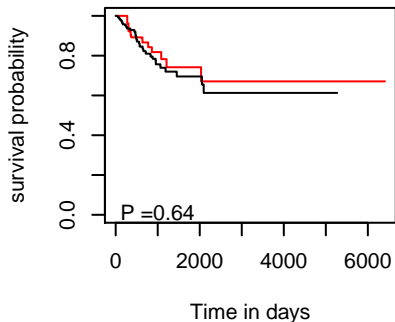

OS hsa-mir-136

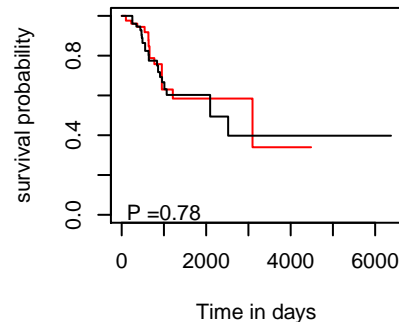

PFI hsa-mir-136

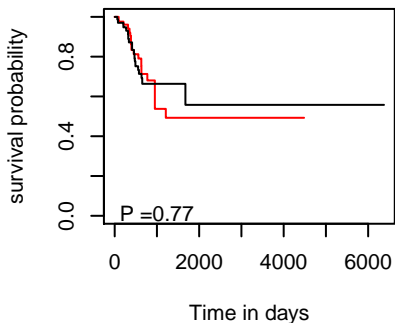

DFI hsa-mir-136

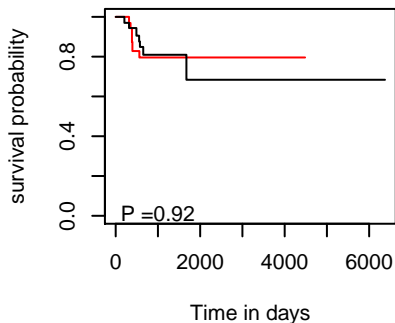

DSS hsa-mir-136

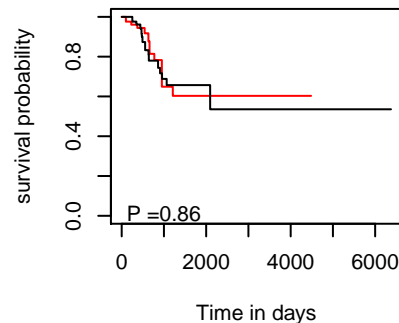

**OS hsa-mir-381**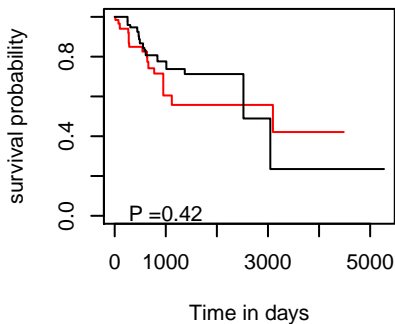**PFI hsa-mir-381**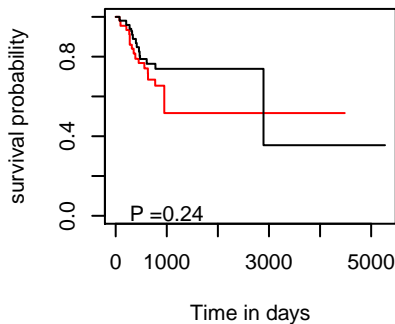**DFI hsa-mir-381**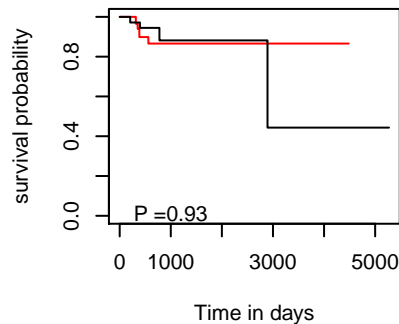**DSS hsa-mir-381**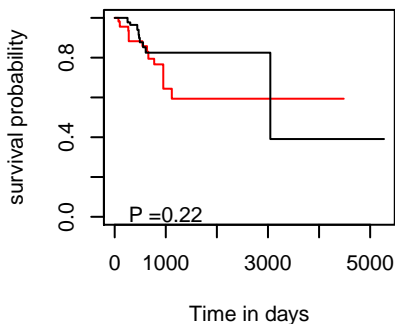**OS hsa-mir-1248**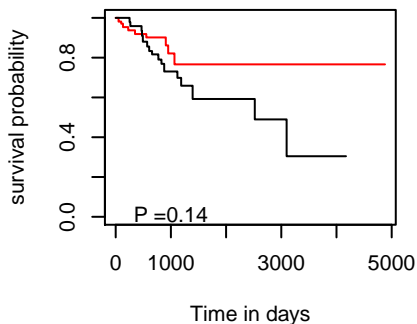**PFI hsa-mir-1248**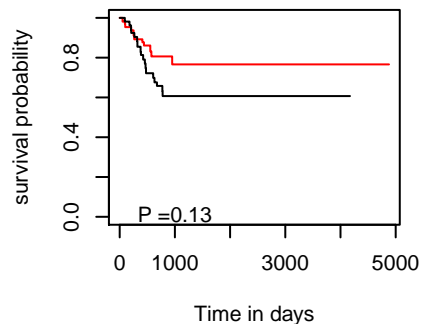**DFI hsa-mir-1248**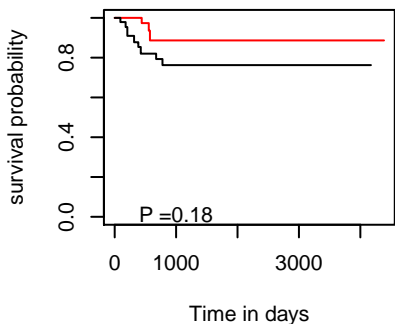**DSS hsa-mir-1248**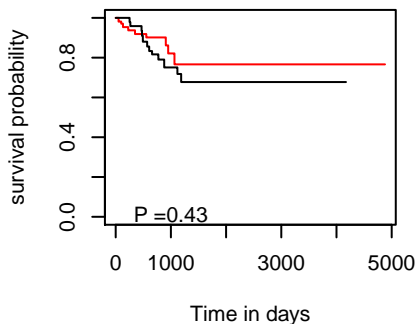**OS hsa-mir-15b**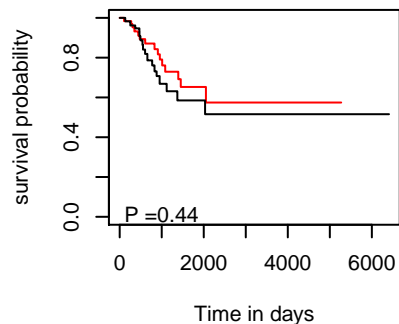

**PFI hsa-mir-15b**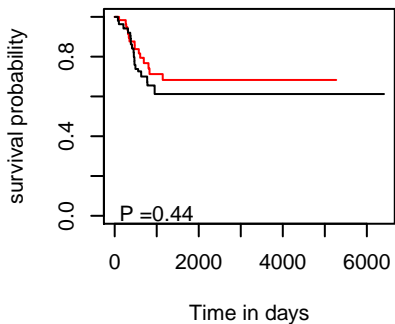**DFI hsa-mir-15b**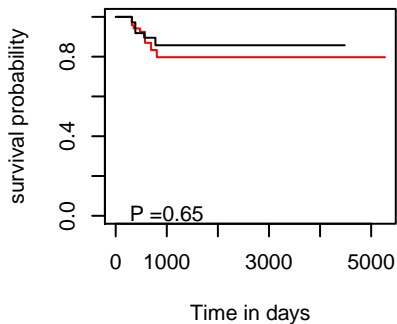**DSS hsa-mir-15b**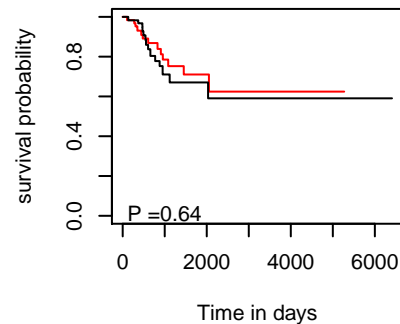**OS hsa-mir-3913-1**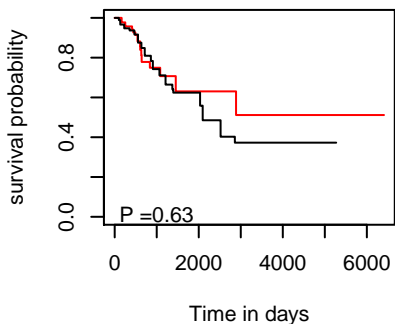**PFI hsa-mir-3913-1**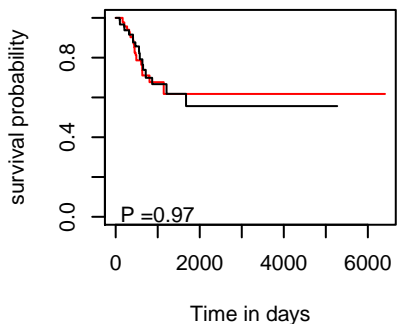**DFI hsa-mir-3913-1**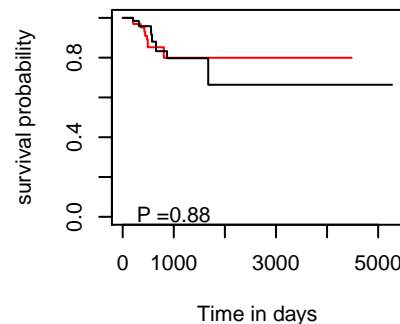**DSS hsa-mir-3913-1**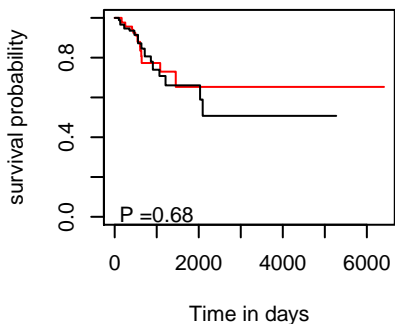**OS hsa-mir-937**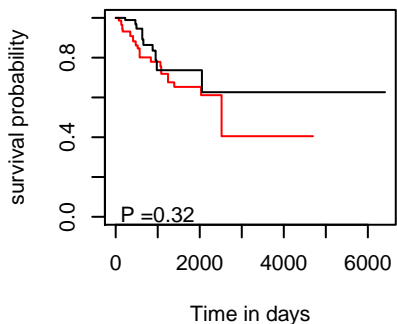**PFI hsa-mir-937**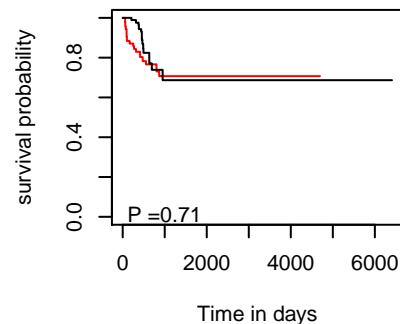

**DFI hsa-mir-937**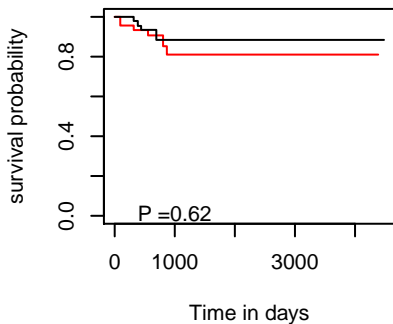**DSS hsa-mir-937**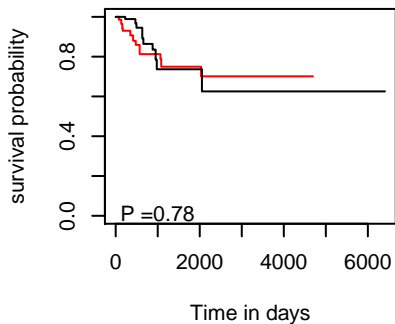**OS hsa-mir-4786**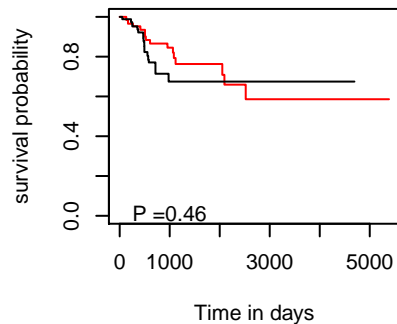**PFI hsa-mir-4786**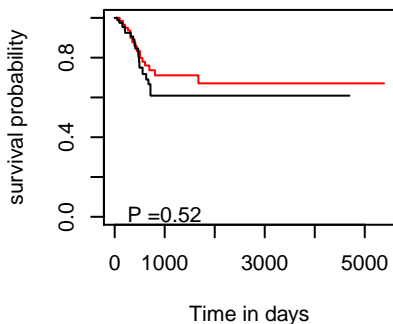**DFI hsa-mir-4786**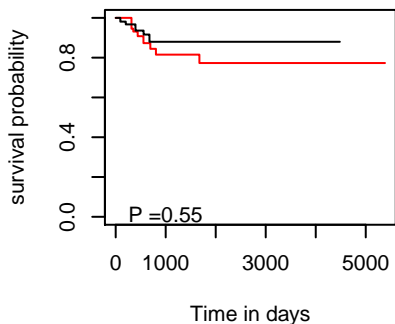**DSS hsa-mir-4786**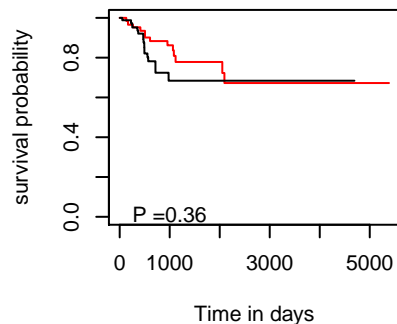**OS hsa-mir-3678**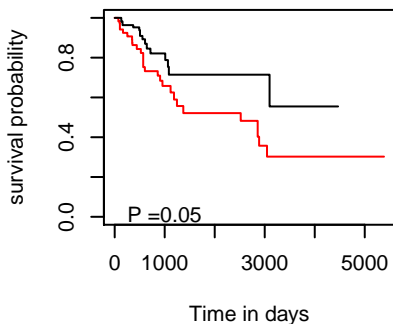**PFI hsa-mir-3678**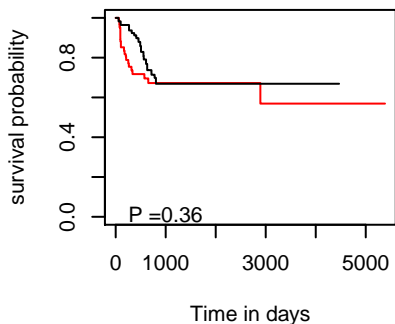**DFI hsa-mir-3678**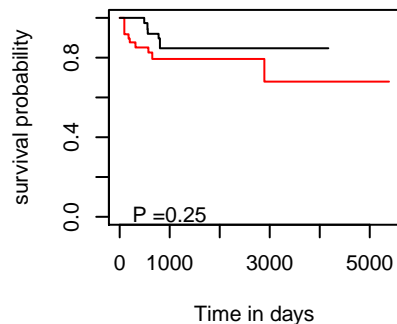

**DSS hsa-mir-3678**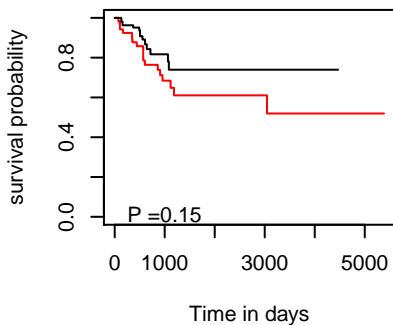**OS hsa-mir-7845**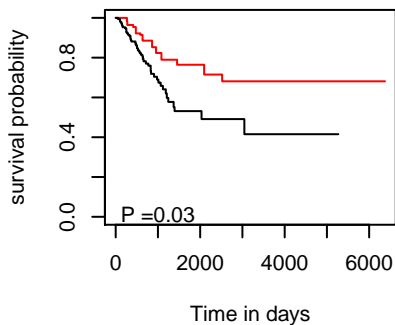**PFI hsa-mir-7845**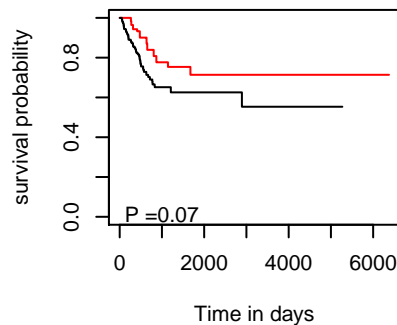**DFI hsa-mir-7845**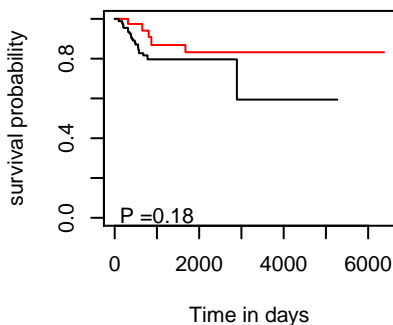**DSS hsa-mir-7845**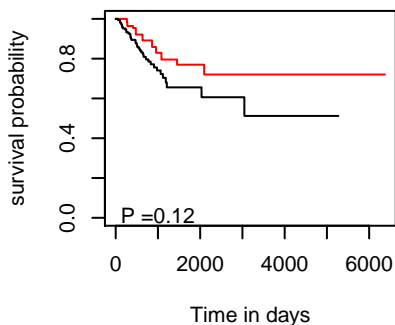**OS hsa-mir-4664**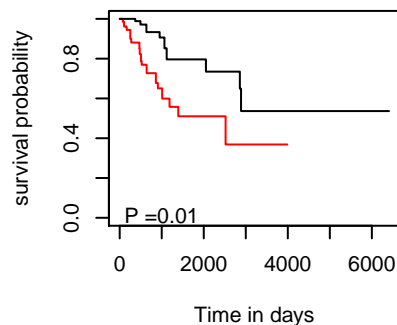**PFI hsa-mir-4664**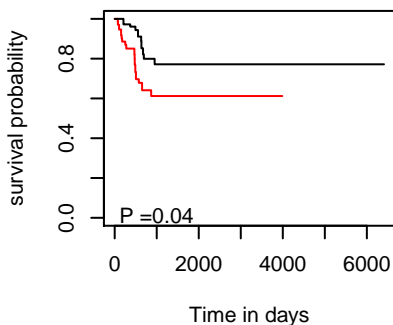**DFI hsa-mir-4664**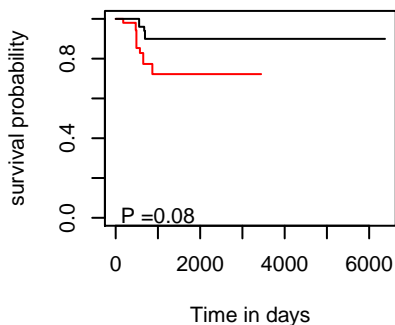**DSS hsa-mir-4664**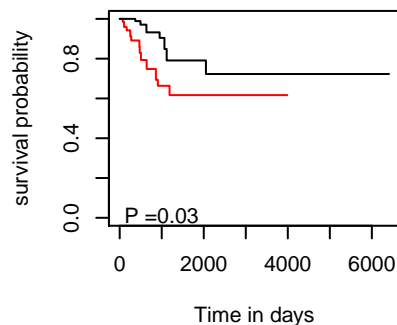

**OS hsa-mir-7-2**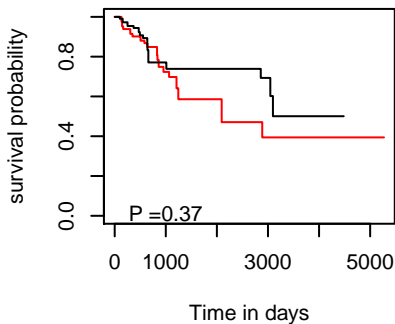**PFI hsa-mir-7-2**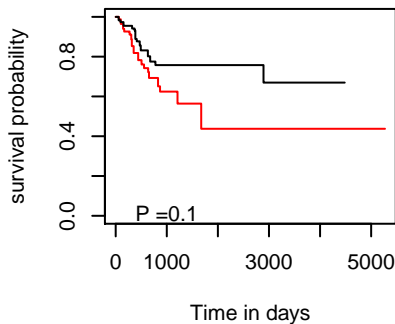**DFI hsa-mir-7-2**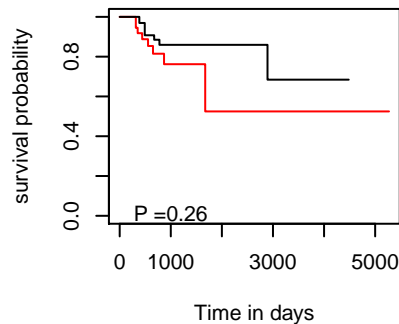**DSS hsa-mir-7-2**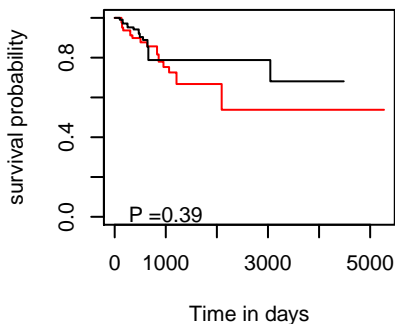**OS hsa-mir-551a**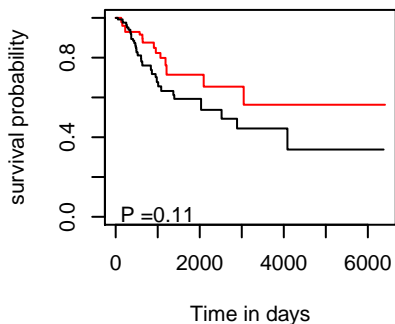**PFI hsa-mir-551a**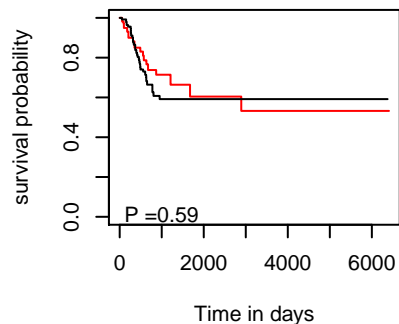**DFI hsa-mir-551a**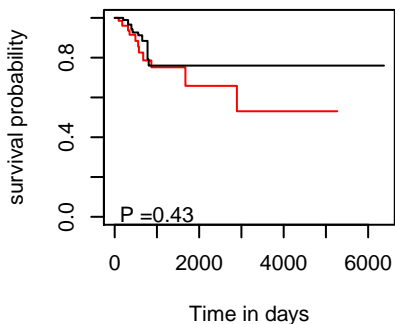**DSS hsa-mir-551a**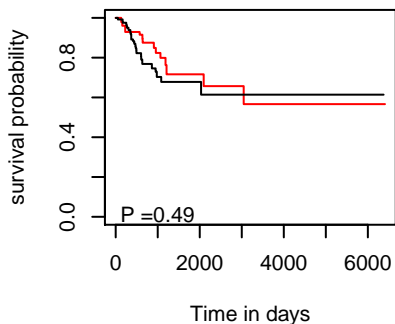**OS hsa-mir-6726**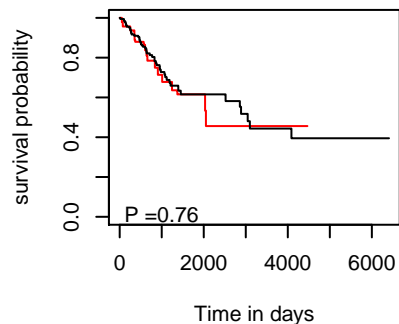

**PFI hsa-mir-6726**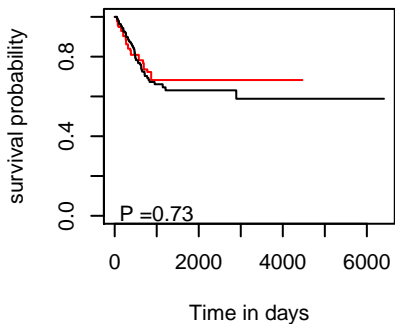**DFI hsa-mir-6726**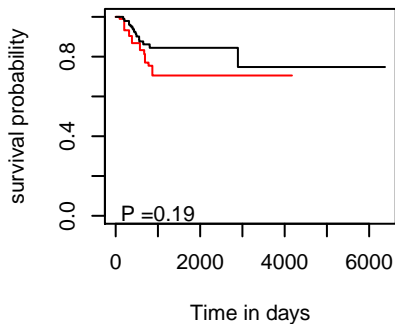**DSS hsa-mir-6726**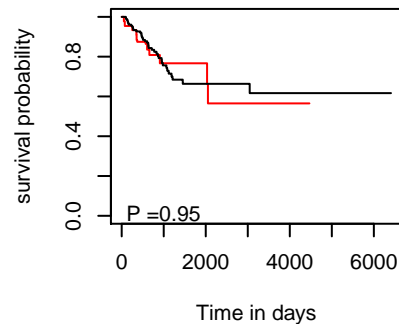**OS hsa-mir-6808**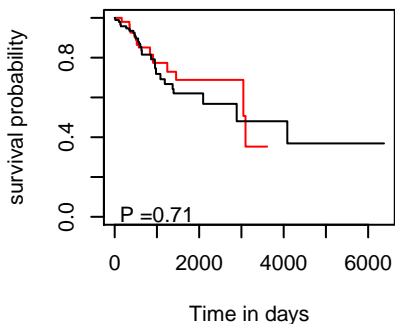**PFI hsa-mir-6808**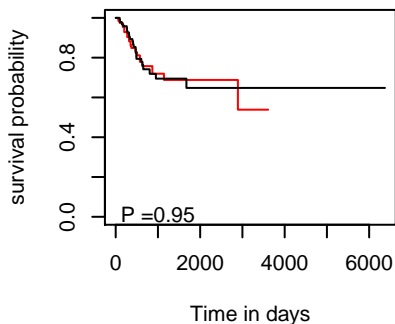**DFI hsa-mir-6808**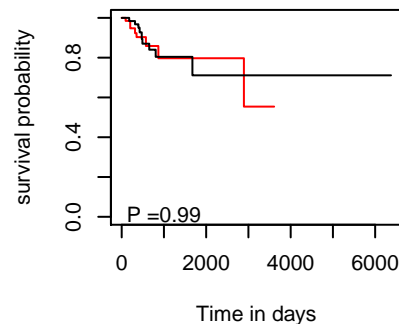**DSS hsa-mir-6808**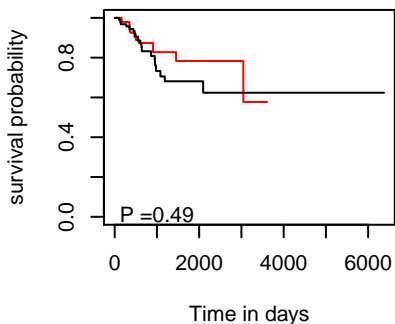**OS hsa-mir-3136**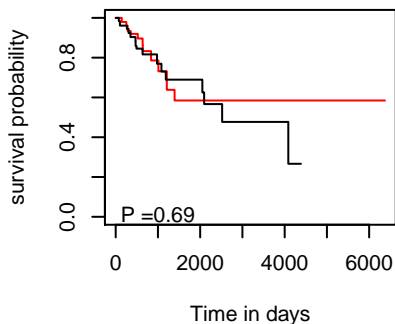**PFI hsa-mir-3136**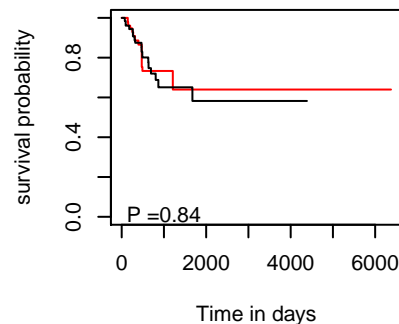

**DFI hsa-mir-3136**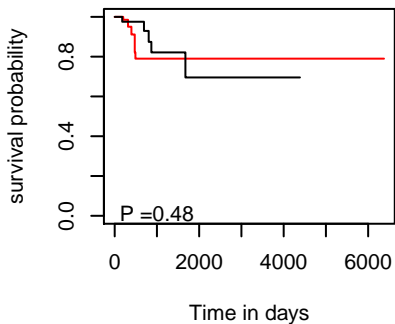**DSS hsa-mir-3136**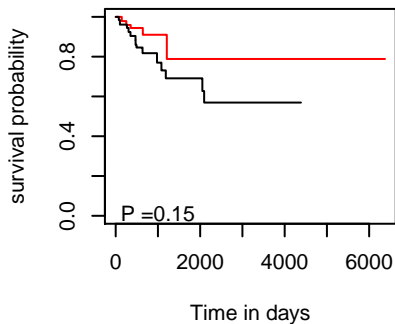**OS hsa-mir-30b**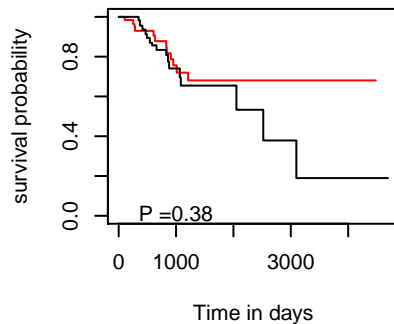**PFI hsa-mir-30b**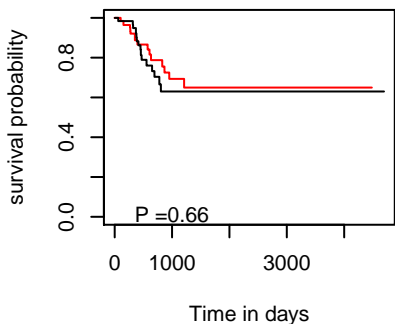**DFI hsa-mir-30b**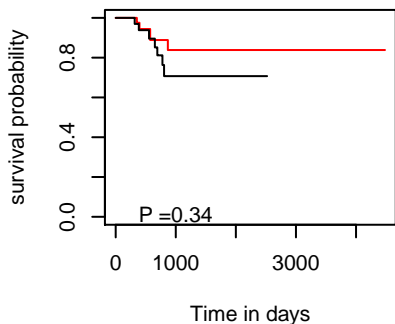**DSS hsa-mir-30b**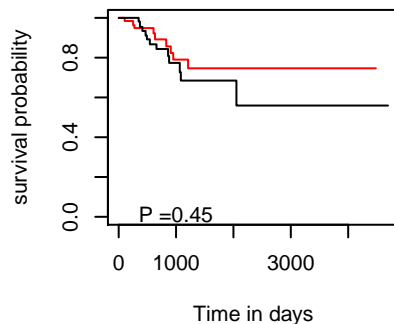**OS hsa-mir-34c**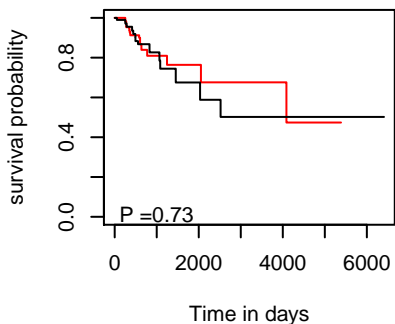**PFI hsa-mir-34c**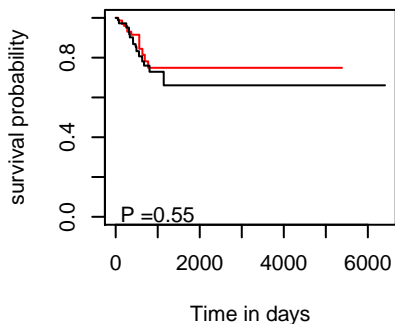**DFI hsa-mir-34c**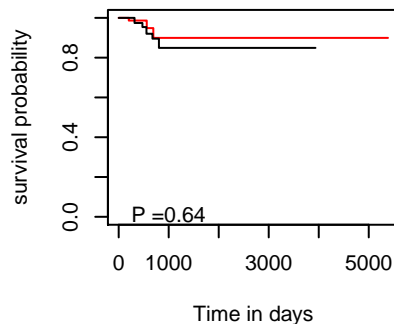

**DSS hsa-mir-34c**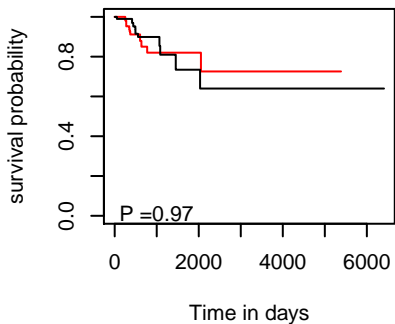**OS hsa-mir-551b**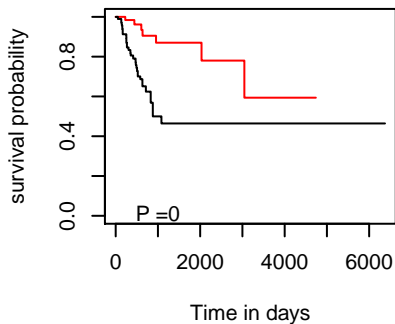**PFI hsa-mir-551b**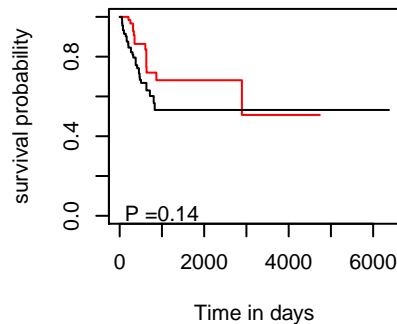**DFI hsa-mir-551b**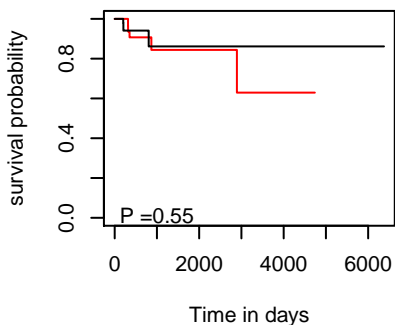**DSS hsa-mir-551b**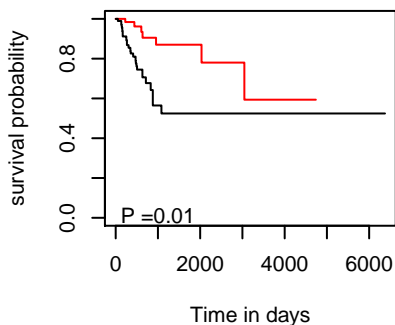**OS hsa-mir-3064**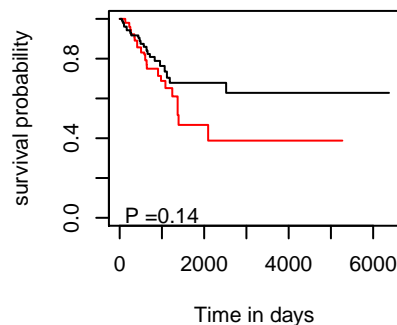**PFI hsa-mir-3064**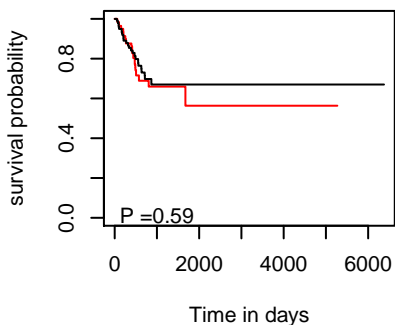**DFI hsa-mir-3064**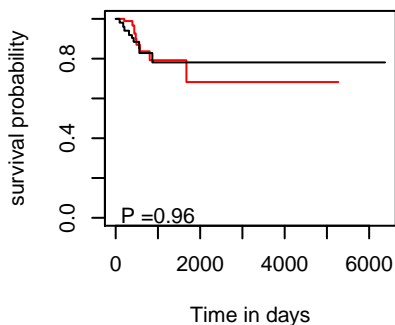**DSS hsa-mir-3064**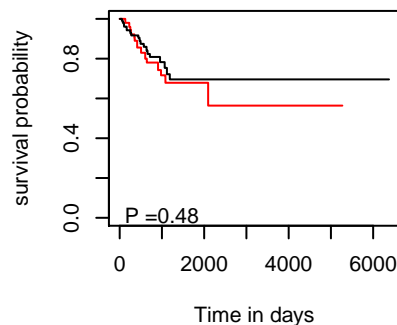

**OS hsa-mir-346**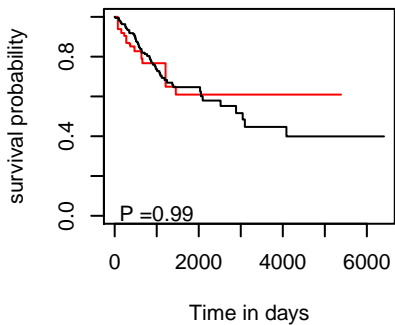**PFI hsa-mir-346**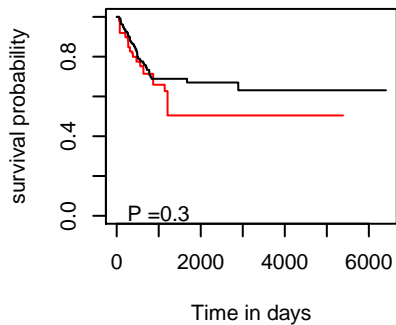**DFI hsa-mir-346**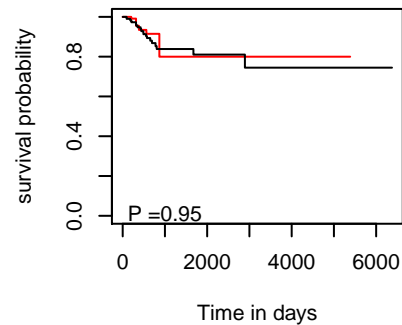**DSS hsa-mir-346**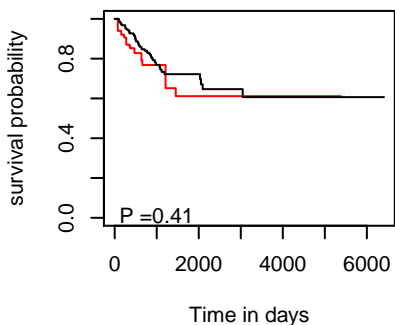**OS hsa-mir-3065**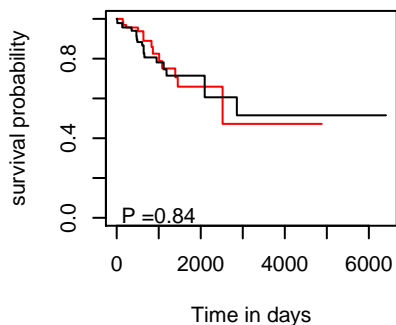**PFI hsa-mir-3065**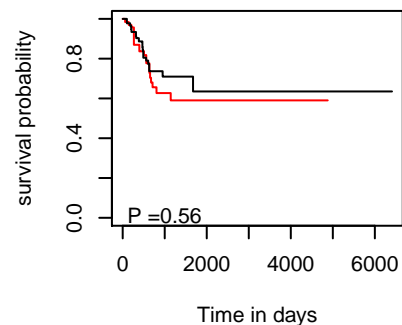**DFI hsa-mir-3065**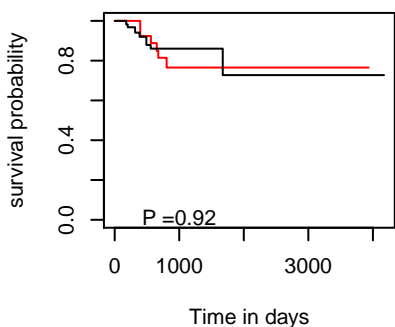**DSS hsa-mir-3065**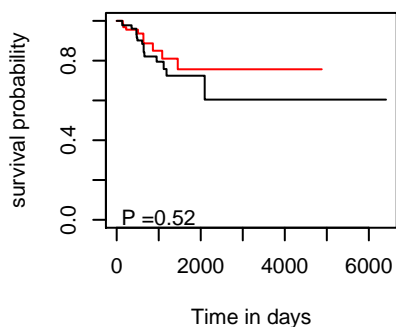**OS hsa-mir-4738**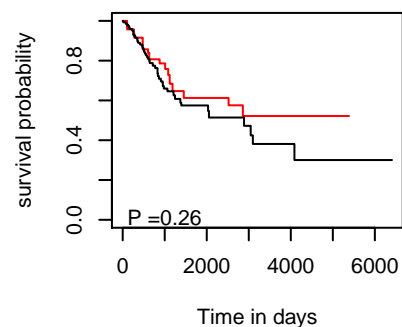

**PFI hsa-mir-4738**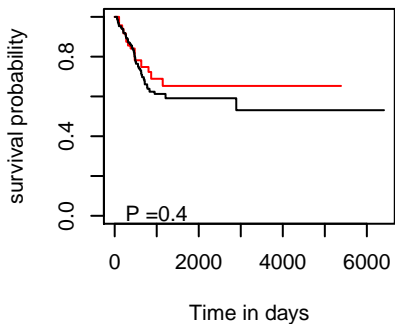**DFI hsa-mir-4738**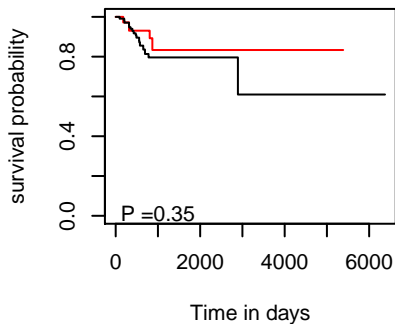**DSS hsa-mir-4738**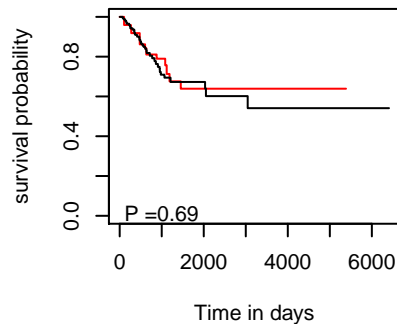**OS hsa-mir-628**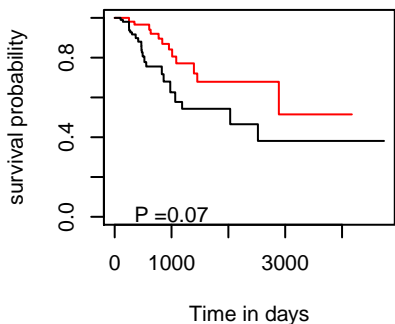**PFI hsa-mir-628**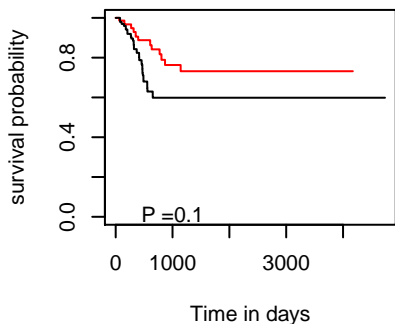**DFI hsa-mir-628**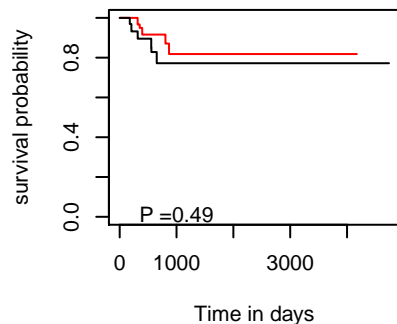**DSS hsa-mir-628**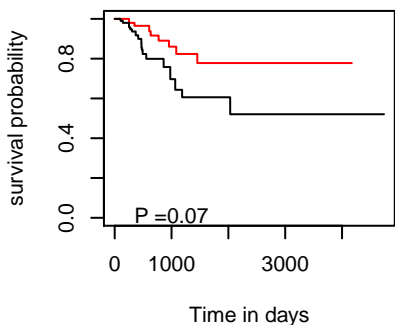**OS hsa-mir-92b**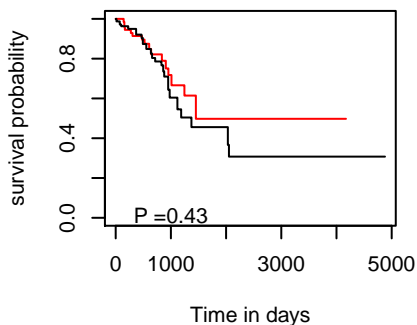**PFI hsa-mir-92b**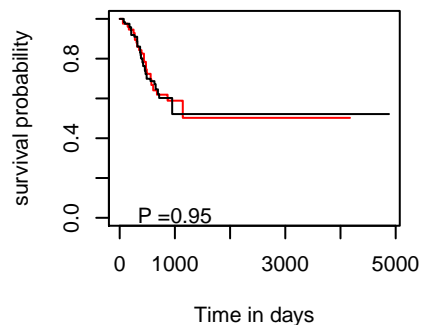

**DFI hsa-mir-92b**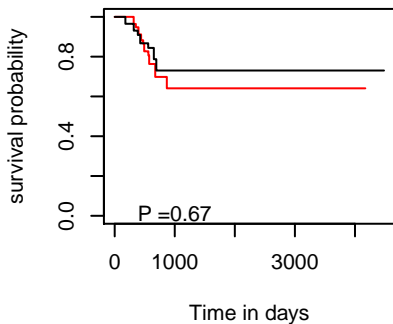**DSS hsa-mir-92b**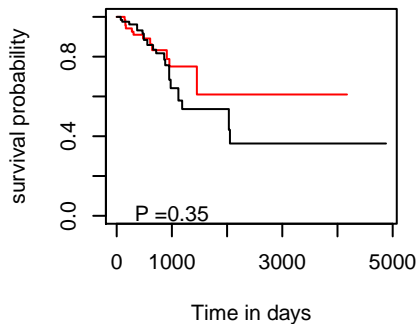**OS hsa-mir-1224**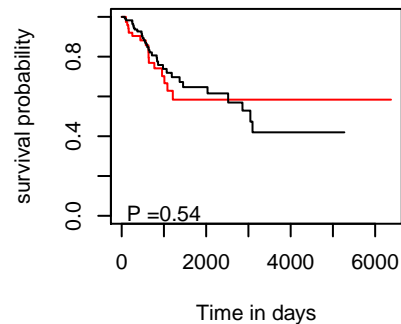**PFI hsa-mir-1224**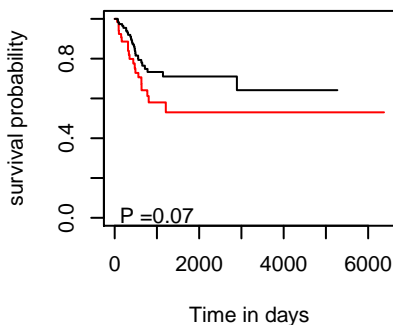**DFI hsa-mir-1224**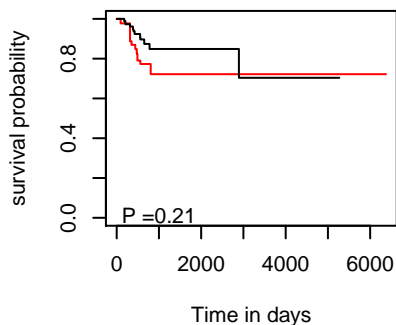**DSS hsa-mir-1224**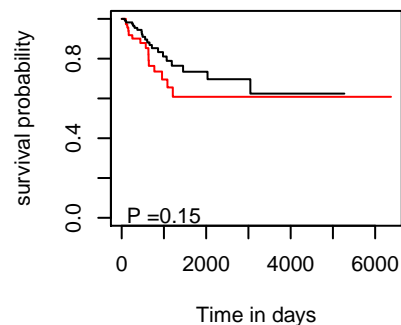**OS hsa-mir-3615**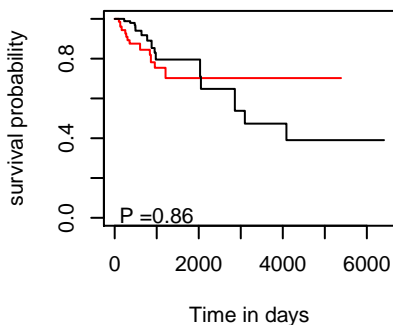**PFI hsa-mir-3615**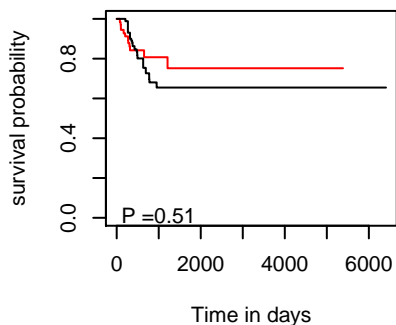**DFI hsa-mir-3615**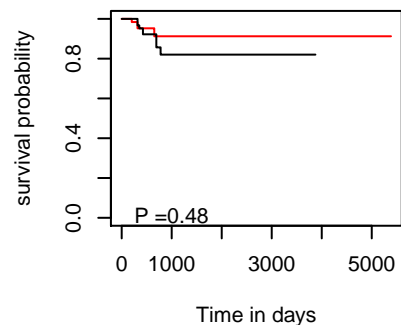

**DSS hsa-mir-3615**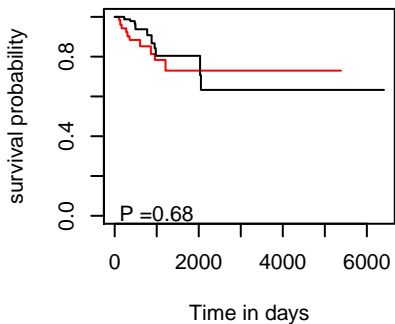**OS hsa-mir-6737**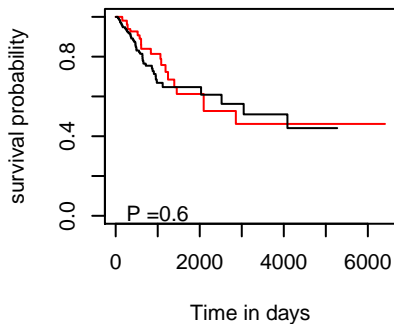**PFI hsa-mir-6737**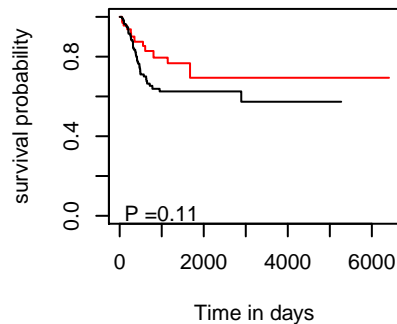**DFI hsa-mir-6737**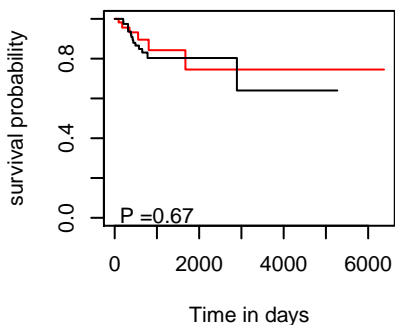**DSS hsa-mir-6737**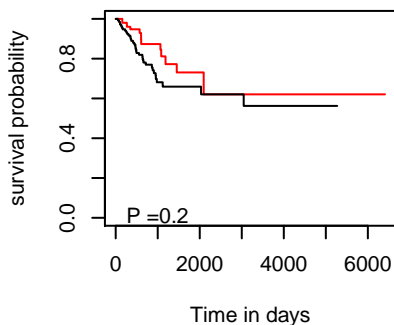**OS hsa-mir-548d-2**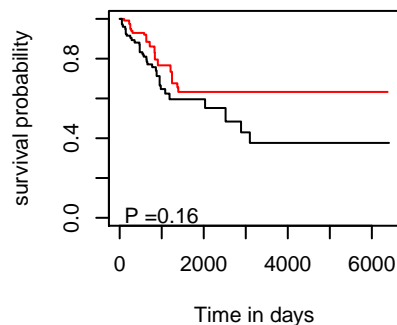**PFI hsa-mir-548d-2**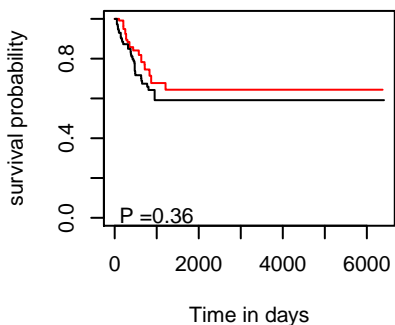**DFI hsa-mir-548d-2**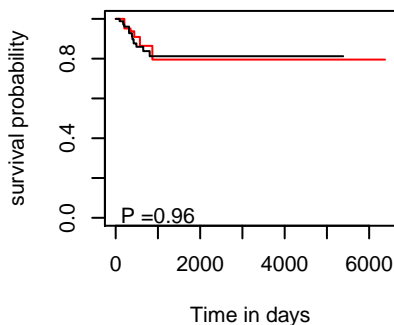**DSS hsa-mir-548d-2**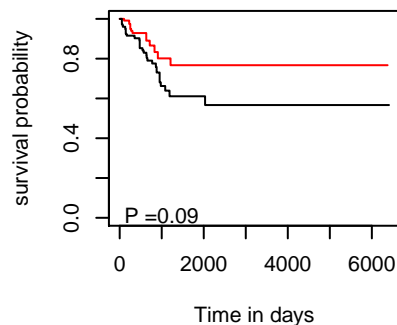

**OS hsa-mir-6730**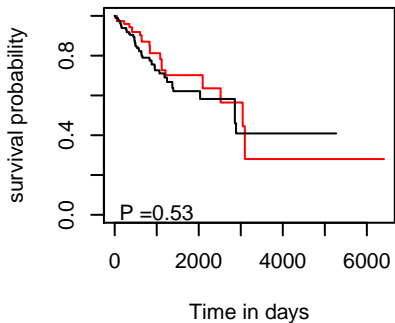**PFI hsa-mir-6730**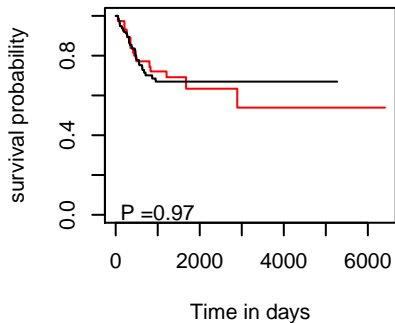**DFI hsa-mir-6730**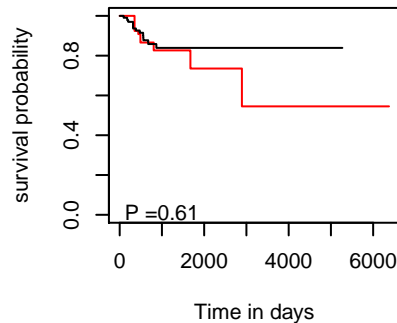**DSS hsa-mir-6730**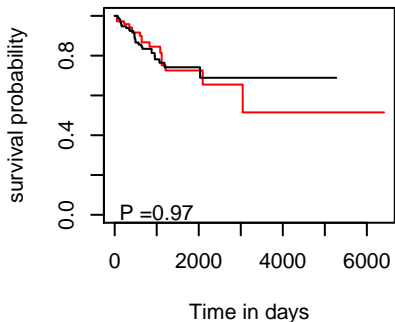**OS hsa-mir-147b**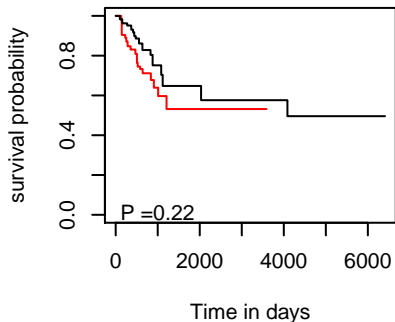**PFI hsa-mir-147b**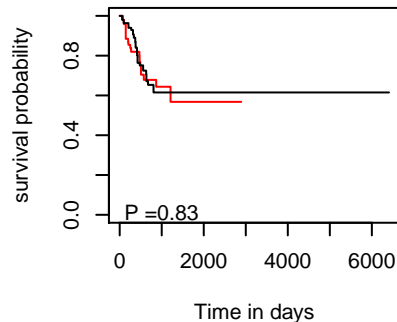**DFI hsa-mir-147b**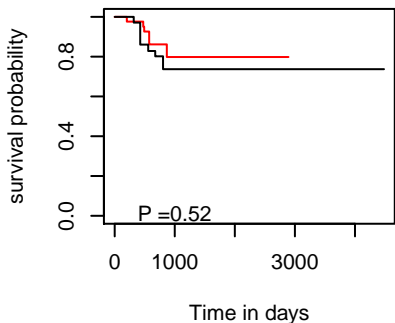**DSS hsa-mir-147b**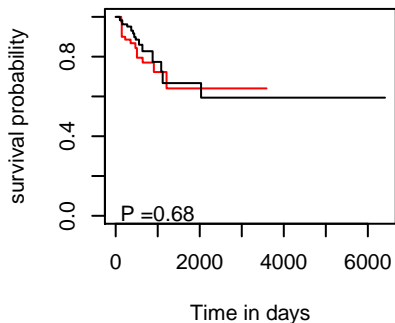**OS hsa-mir-9-1**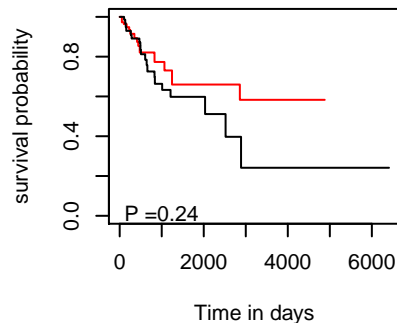

**PFI hsa-mir-9-1**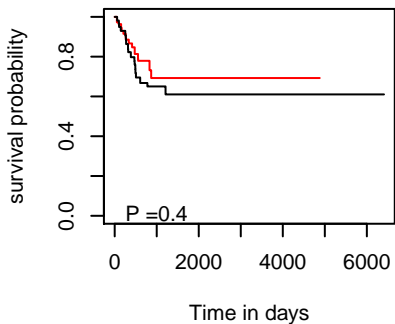**DFI hsa-mir-9-1**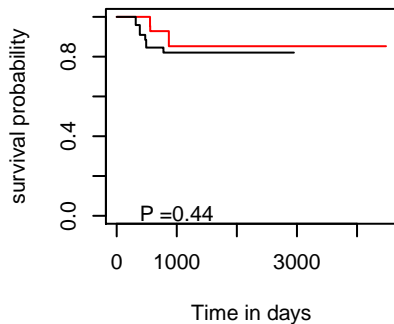**DSS hsa-mir-9-1**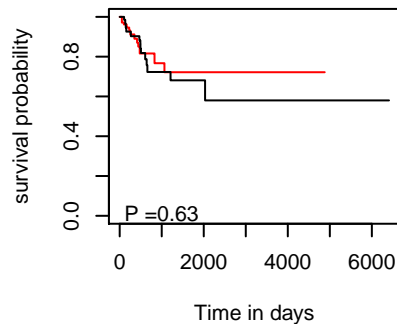**OS hsa-mir-197**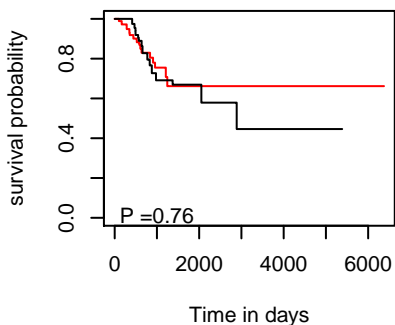**PFI hsa-mir-197**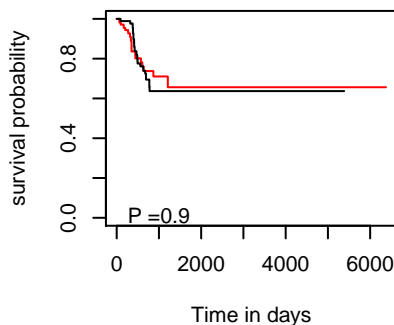**DFI hsa-mir-197**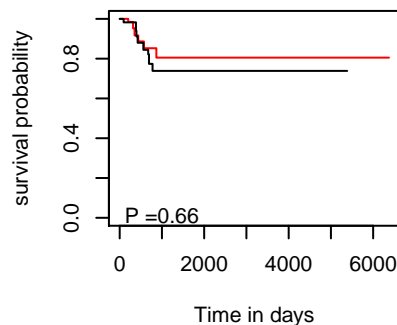**DSS hsa-mir-197**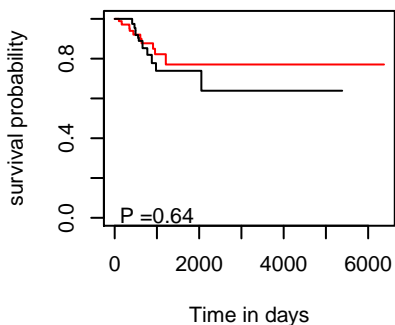**OS hsa-mir-30d**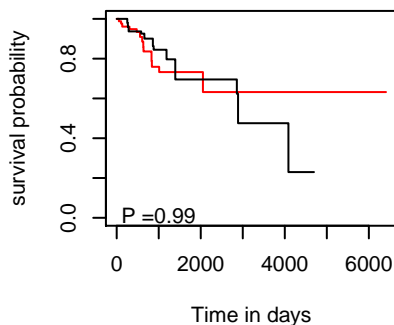**PFI hsa-mir-30d**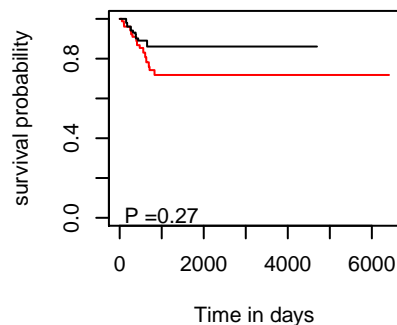

DFI hsa-mir-30d

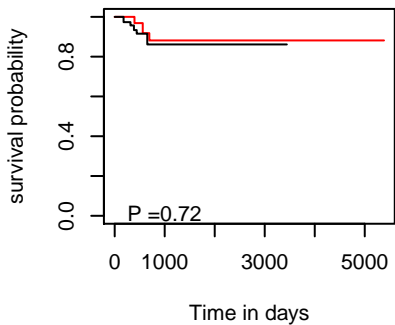

DSS hsa-mir-30d

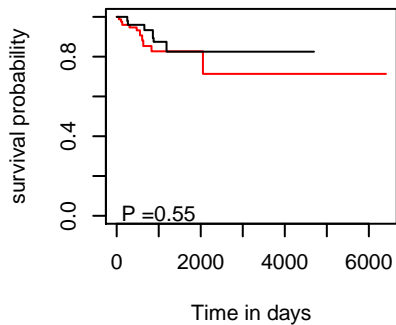

Supplement: MOESM13 [file 41598_2022_7628_MOESM13_ESM.pdf]
