# Supplementary material for: New Thinking on Read-Aloud.
Source: Springer Nature journal article supplement (doi:10.1038/s41598-022-07628-z), 2001-01-01

# Computing microRNA-gene interaction networks in pan-cancer using miRDriver

Banabithi Bose, Matthew Moravec, and Serdar Bozdog

# Supplemental Figure S5

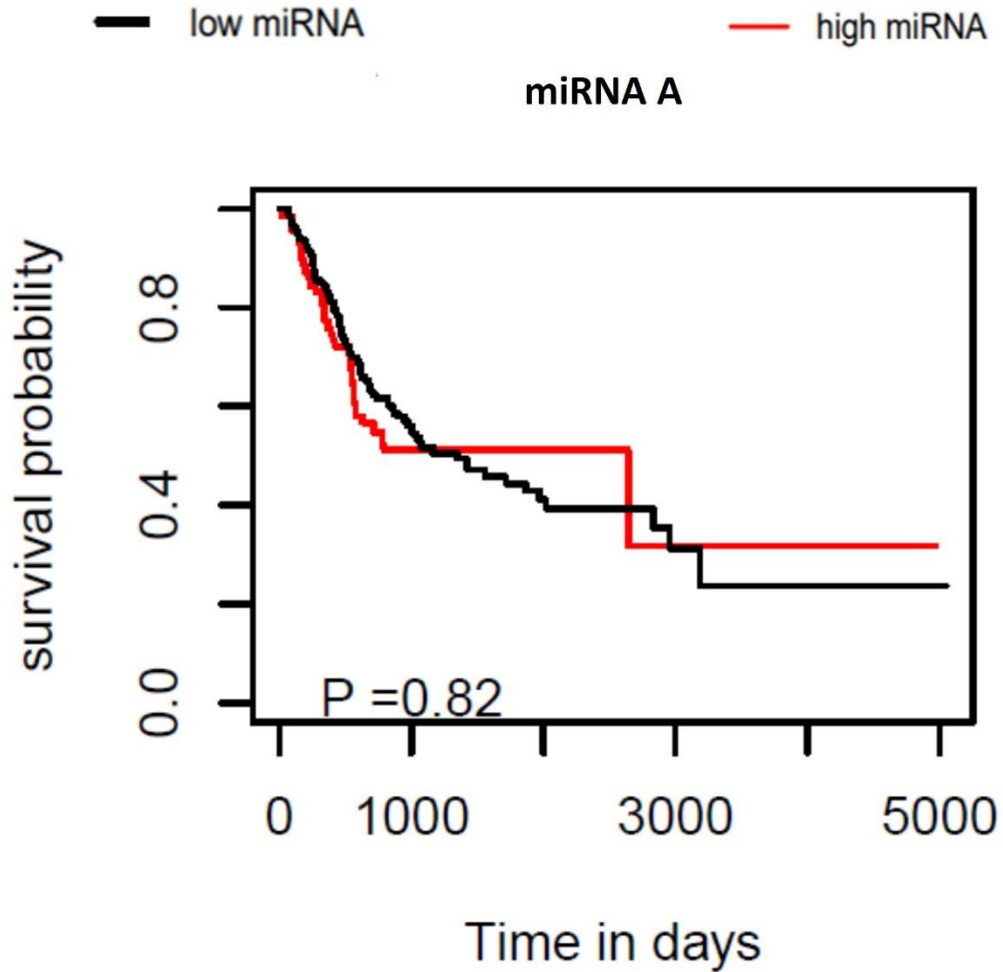

The *Adjusted Kaplan-Meier* survival plots for the computed miRNAs in high and low miRNA expression patient groups.

# Supplemental Figure S5

# Cancer Type: DLBC

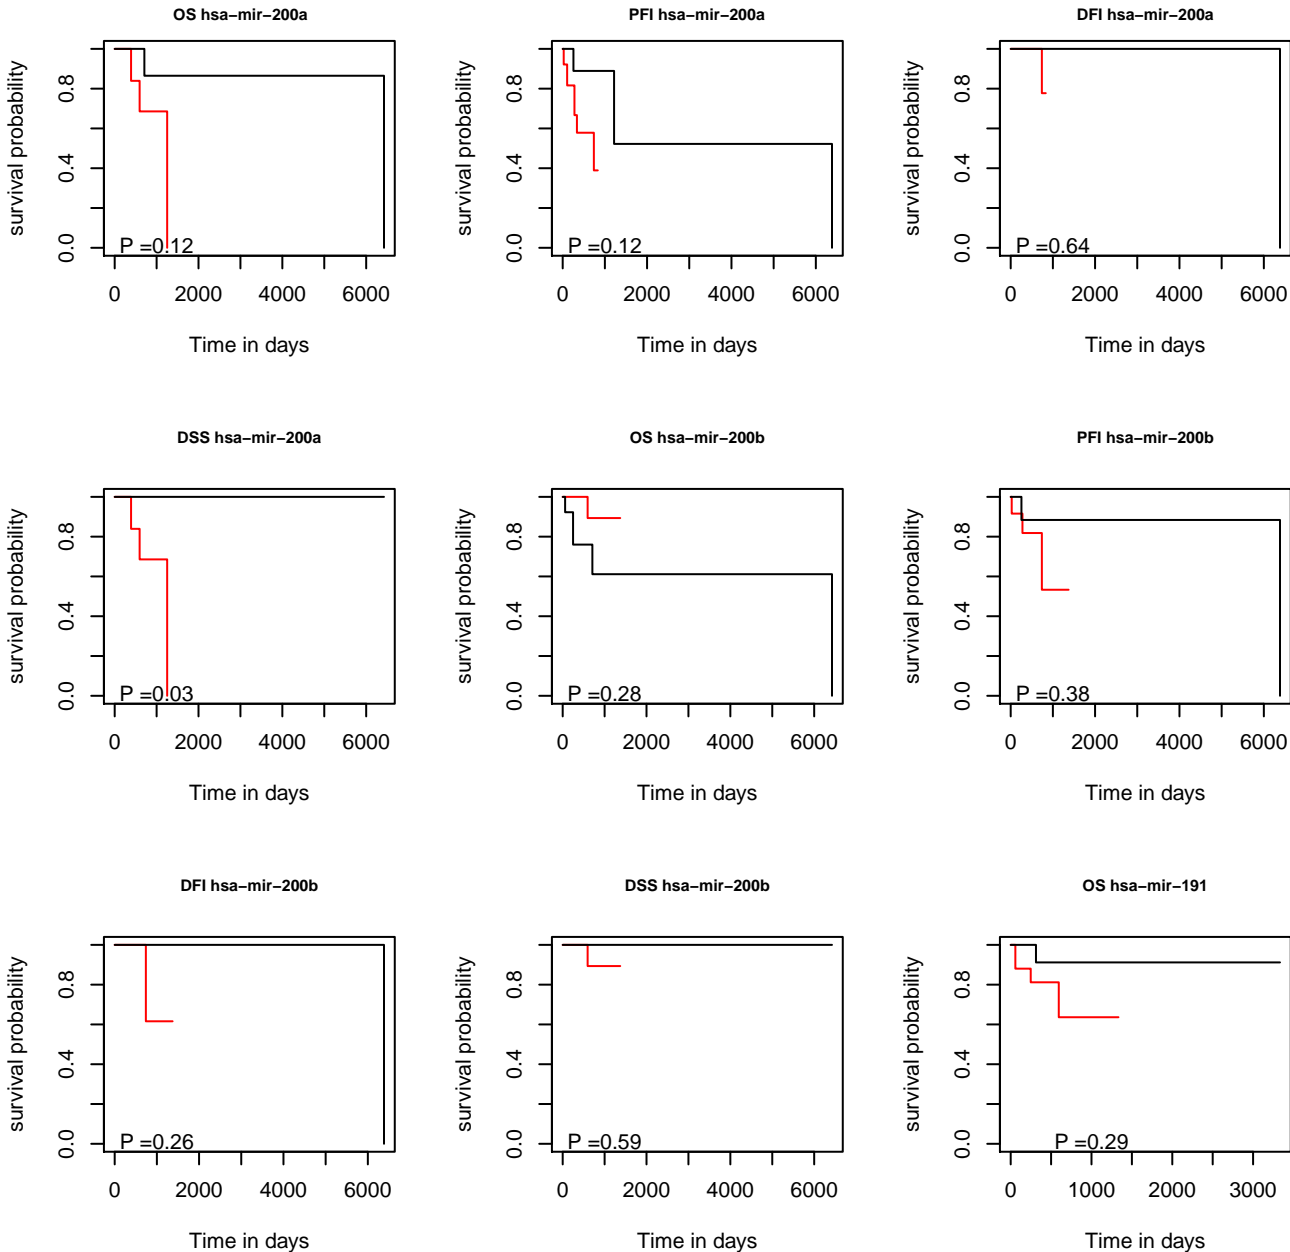

**PFI hsa-mir-191**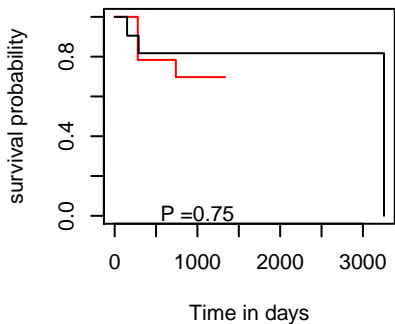**OS hsa-mir-4784**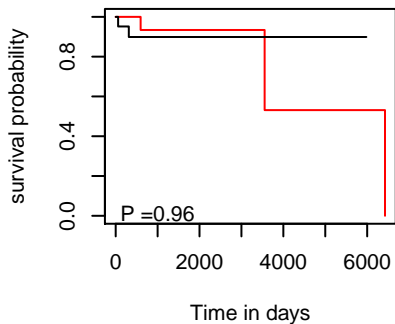**PFI hsa-mir-4784**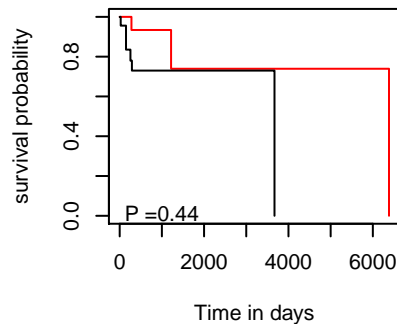**DFI hsa-mir-4784**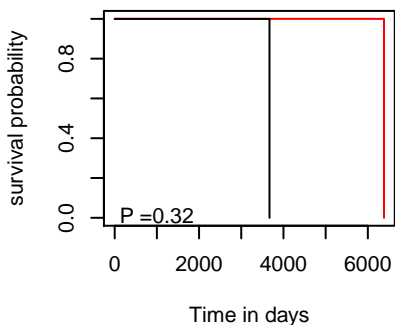**DSS hsa-mir-4784**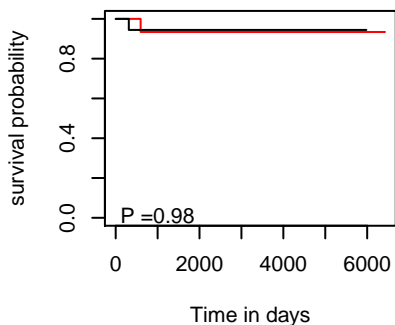**OS hsa-mir-346**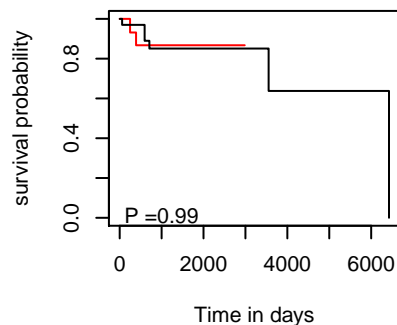**PFI hsa-mir-346**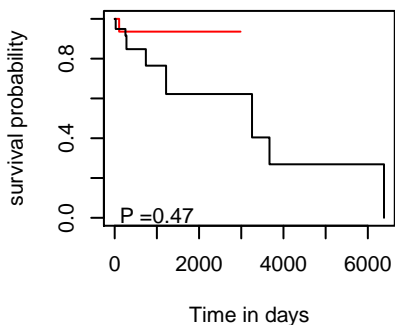**DFI hsa-mir-346**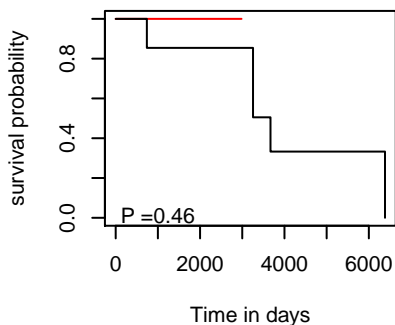**DSS hsa-mir-346**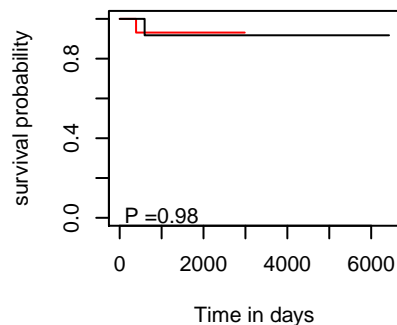

**OS hsa-mir-429**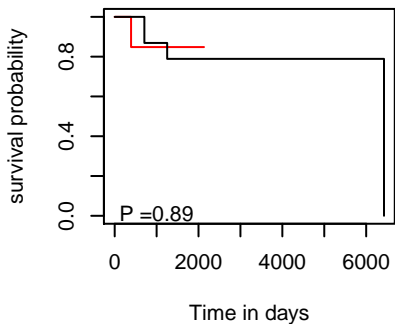**PFI hsa-mir-429**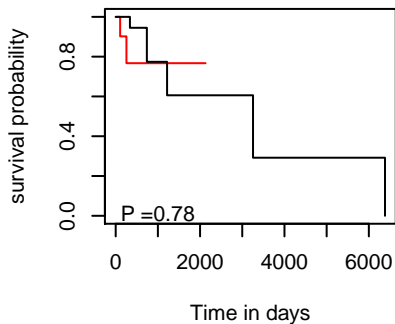**DFI hsa-mir-429**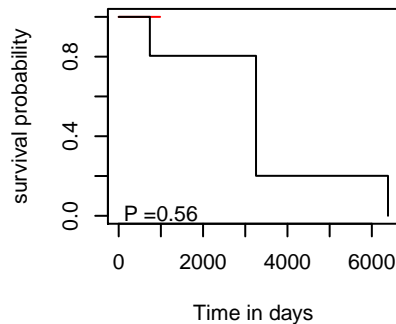**DSS hsa-mir-429**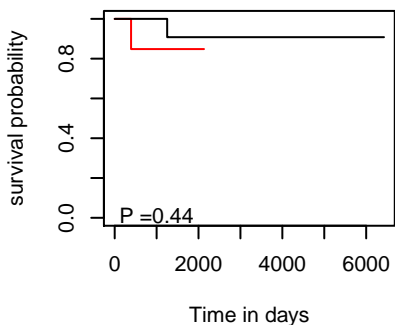**OS hsa-mir-425**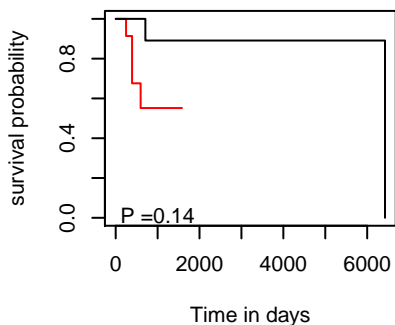**PFI hsa-mir-425**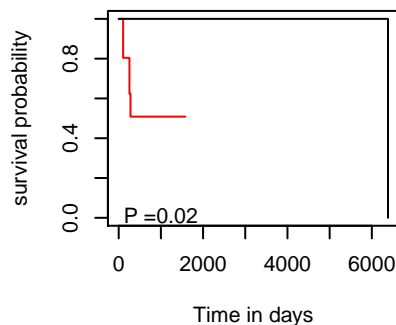**DFI hsa-mir-425**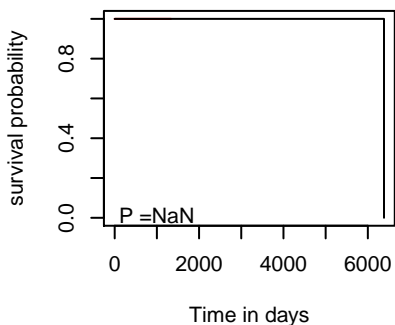**DSS hsa-mir-425**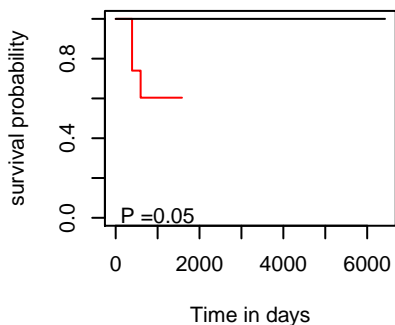**OS hsa-mir-147b**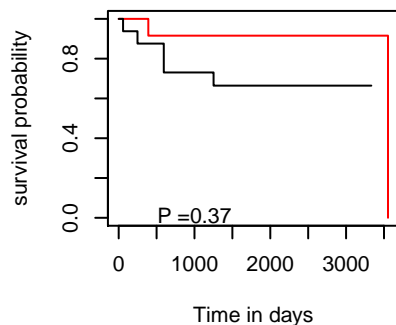

**PFI hsa-mir-147b**

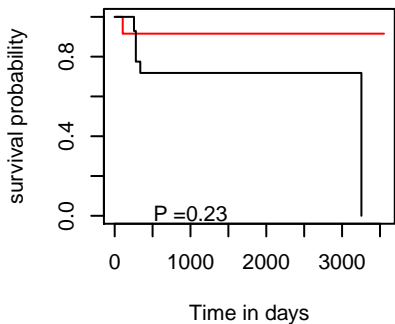

**DFI hsa-mir-147b**

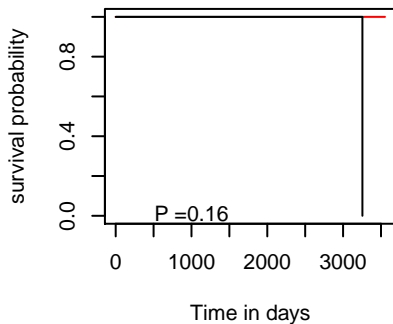

**DSS hsa-mir-147b**

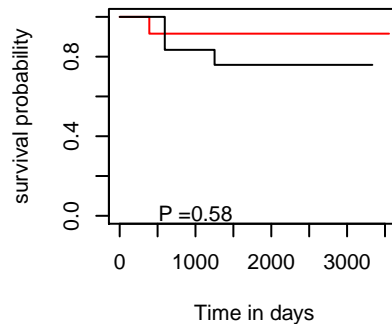

**OS hsa-mir-1226**

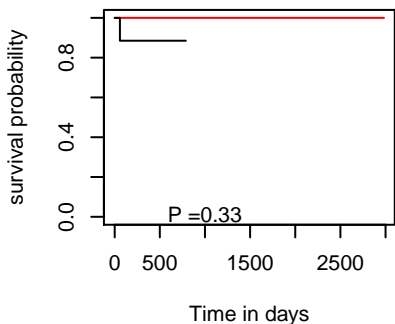

**PFI hsa-mir-1226**

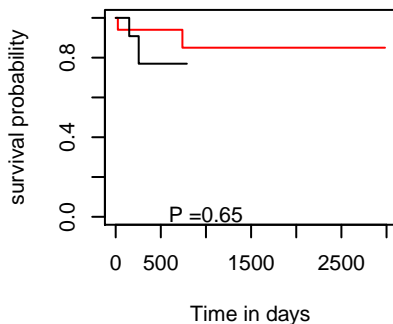

**DFI hsa-mir-1226**

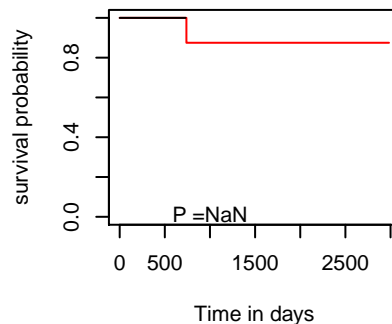

**DSS hsa-mir-1226**

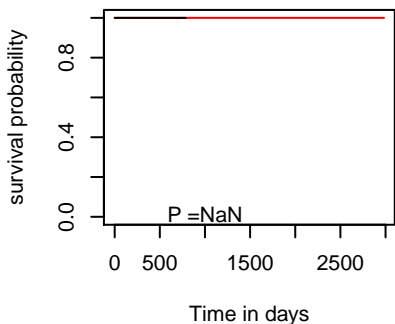

**OS hsa-mir-551a**

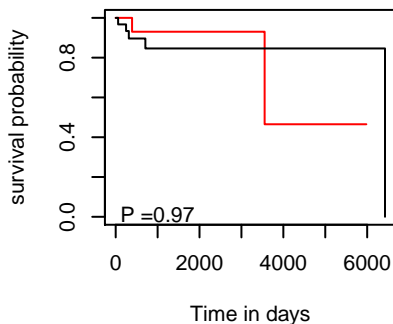

**PFI hsa-mir-551a**

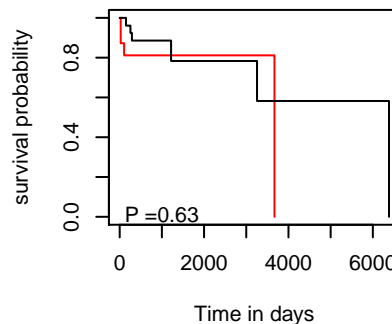

**DFI hsa-mir-551a**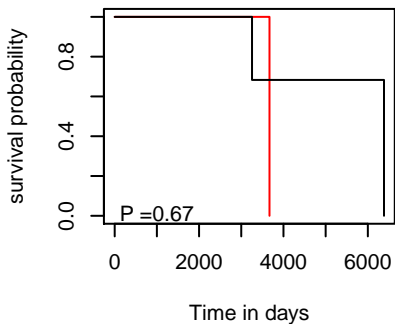**DSS hsa-mir-551a**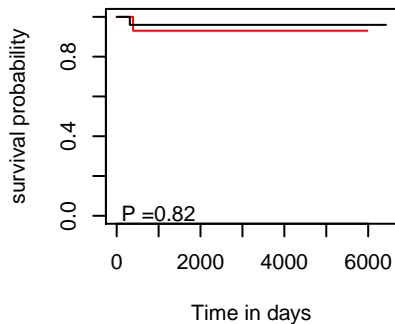**OS hsa-mir-6726**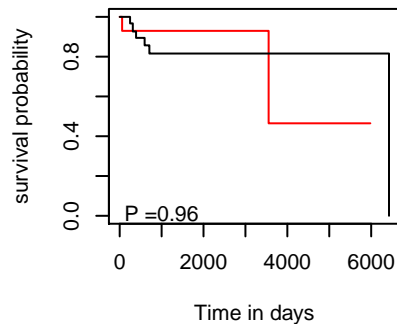**PFI hsa-mir-6726**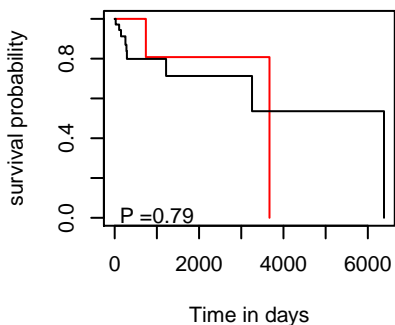**DFI hsa-mir-6726**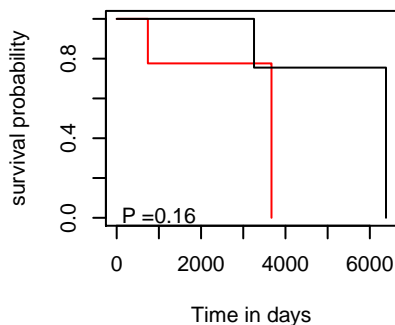**DSS hsa-mir-6726**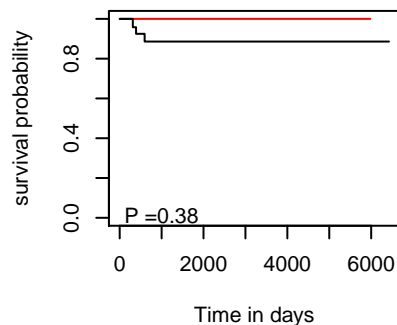**OS hsa-mir-4662a**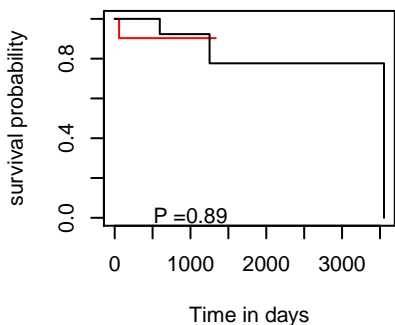**PFI hsa-mir-4662a**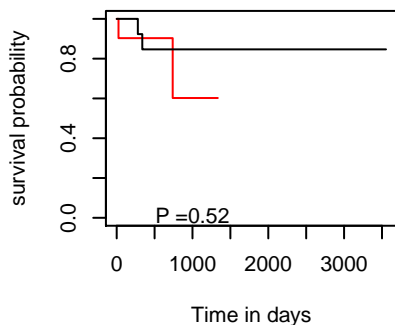**DFI hsa-mir-4662a**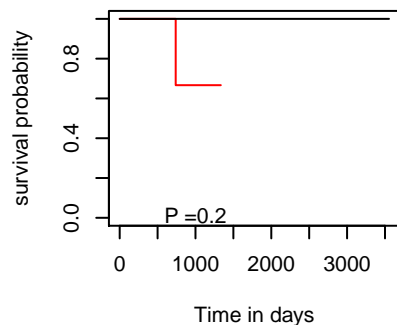

**DSS hsa-mir-4662a**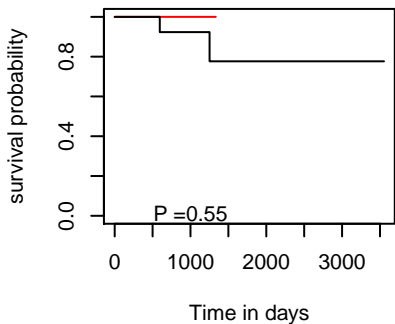**OS hsa-mir-6833**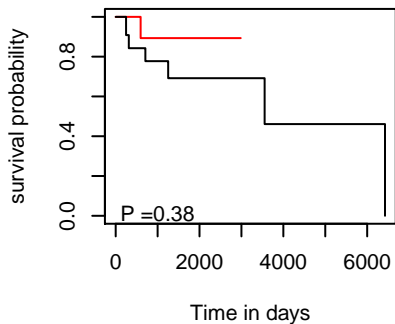**PFI hsa-mir-6833**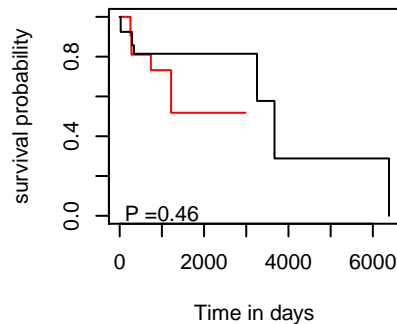**DFI hsa-mir-6833**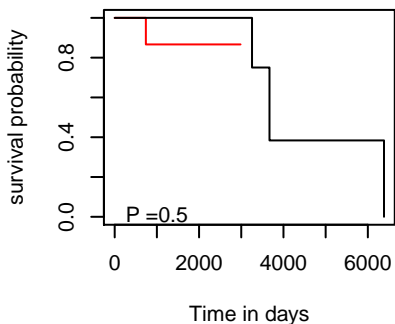**DSS hsa-mir-6833**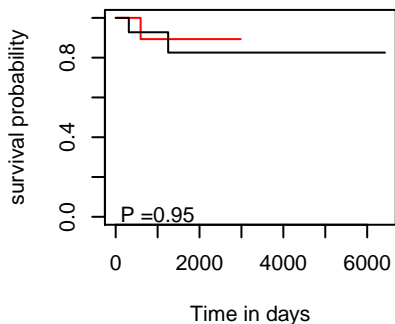**OS hsa-mir-6723**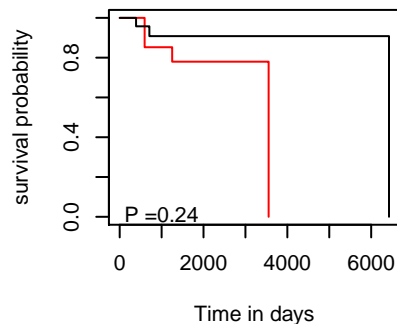**PFI hsa-mir-6723**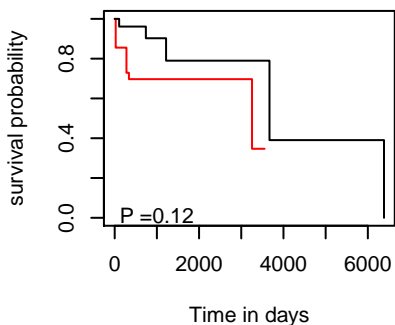**DFI hsa-mir-6723**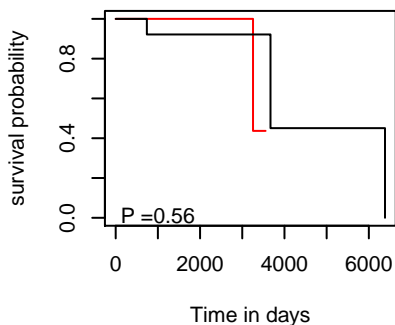**DSS hsa-mir-6723**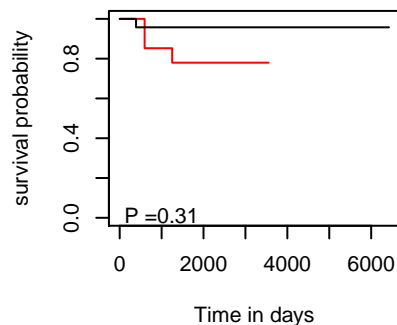

**OS hsa-mir-6803**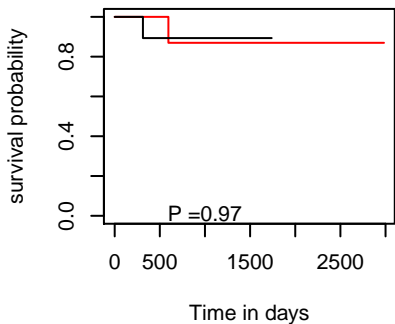**PFI hsa-mir-6803**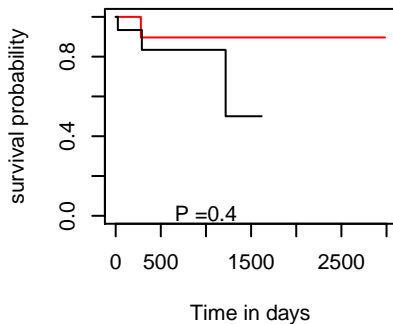**DFI hsa-mir-6803**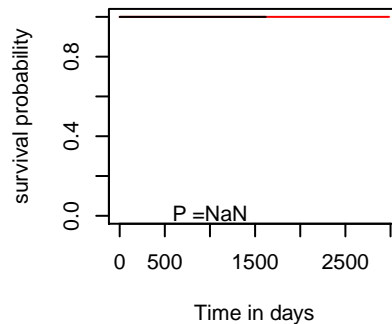**DSS hsa-mir-6803**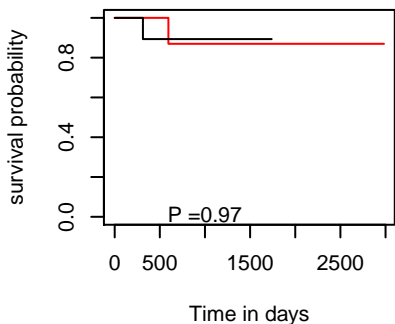**OS hsa-mir-6844**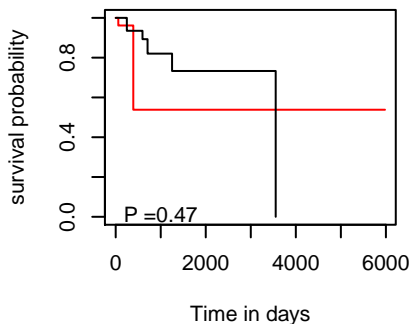**PFI hsa-mir-6844**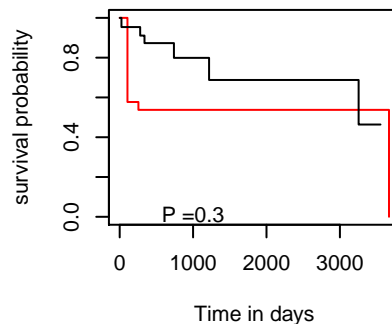**DFI hsa-mir-6844**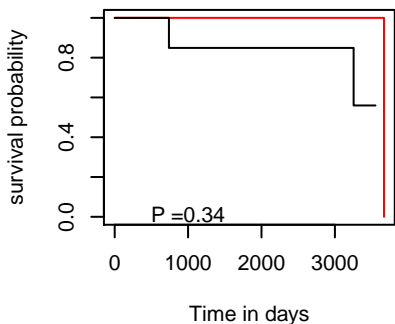**DSS hsa-mir-6844**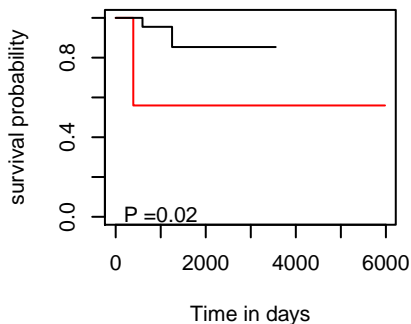**OS hsa-mir-6808**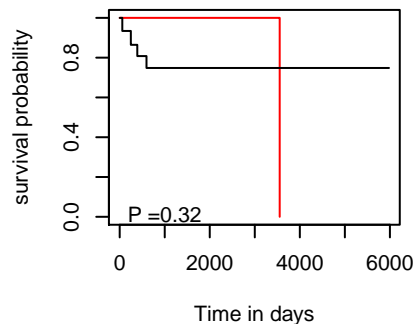

**PFI hsa-mir-6808**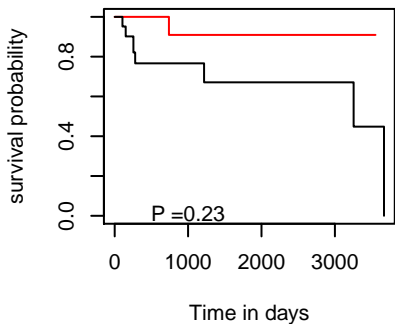**DFI hsa-mir-6808**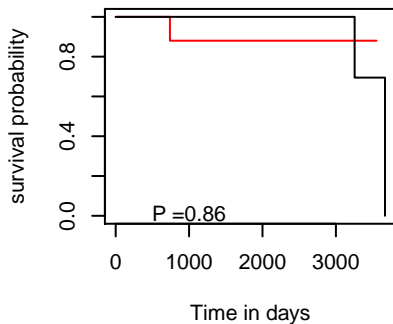**DSS hsa-mir-6808**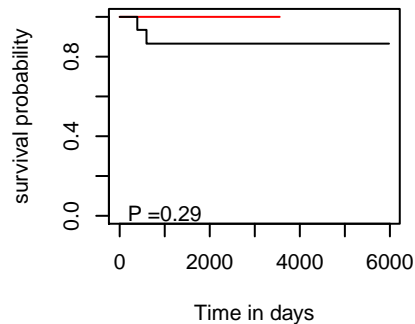**OS hsa-mir-570**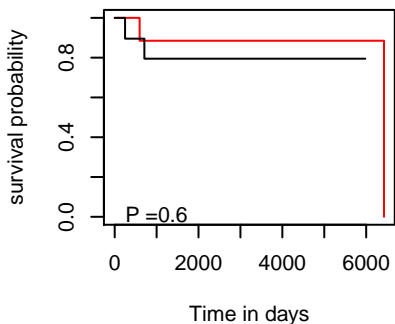**PFI hsa-mir-570**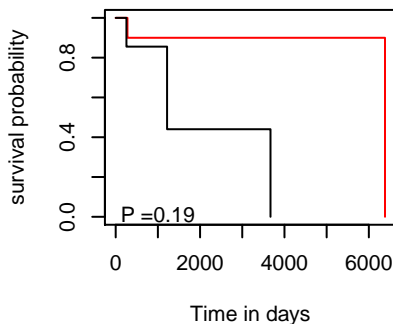**DFI hsa-mir-570**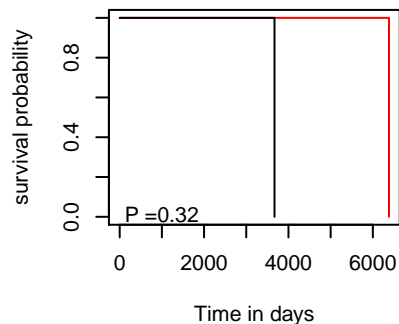**DSS hsa-mir-570**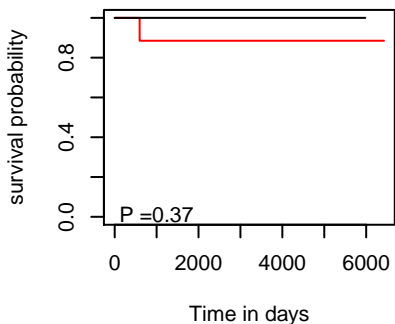**OS hsa-mir-6727**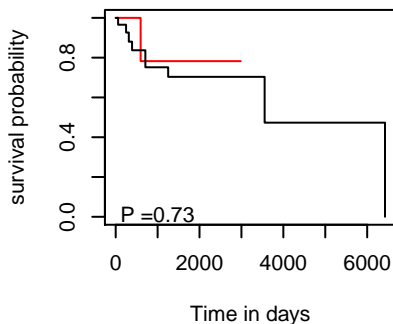**PFI hsa-mir-6727**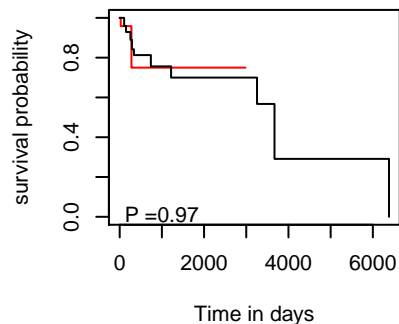

**DFI hsa-mir-6727**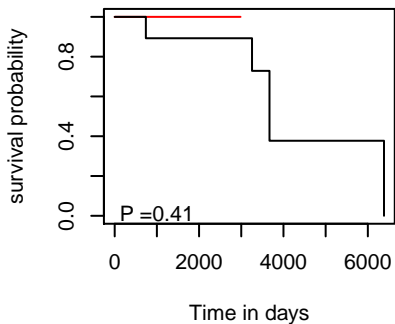**DSS hsa-mir-6727**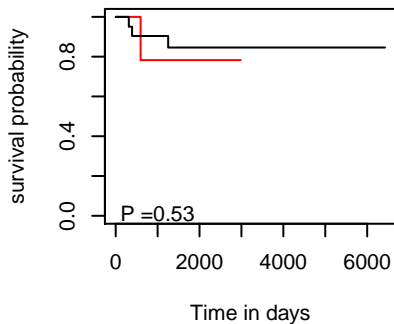**OS hsa-mir-4797**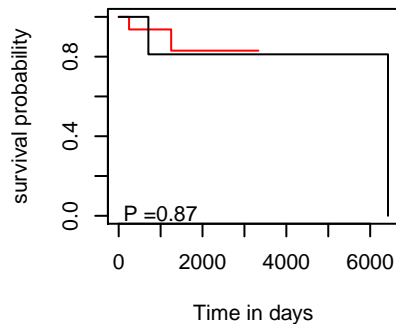**PFI hsa-mir-4797**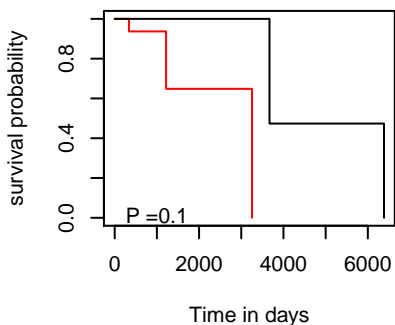**DFI hsa-mir-4797**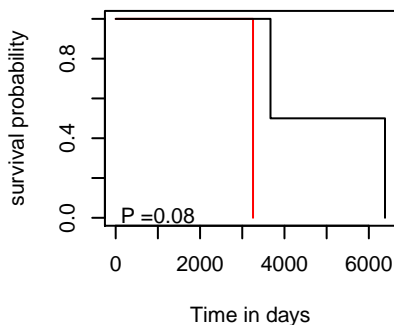**DSS hsa-mir-4797**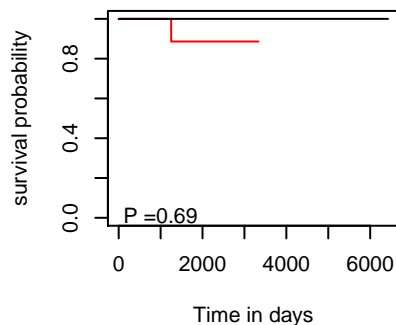**OS hsa-mir-2115**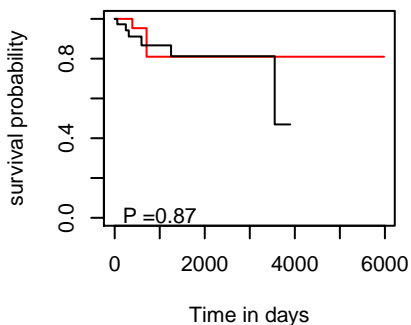**PFI hsa-mir-2115**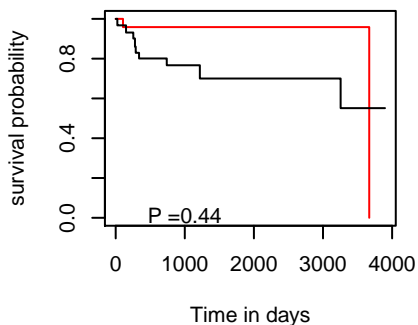**DFI hsa-mir-2115**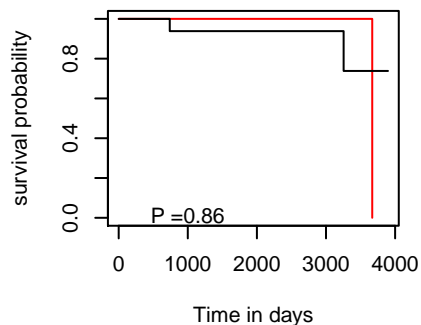

**DSS hsa-mir-2115**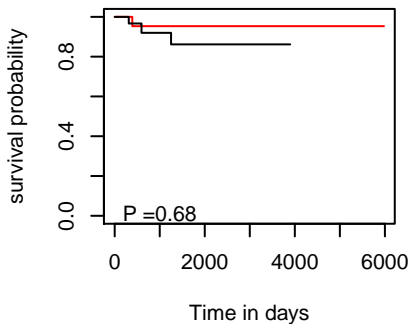**OS hsa-mir-6805**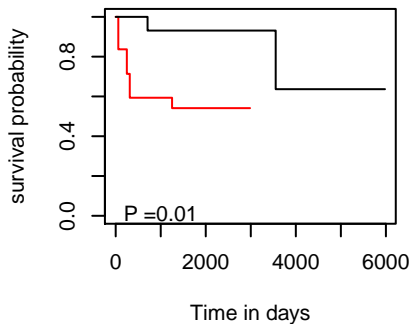**PFI hsa-mir-6805**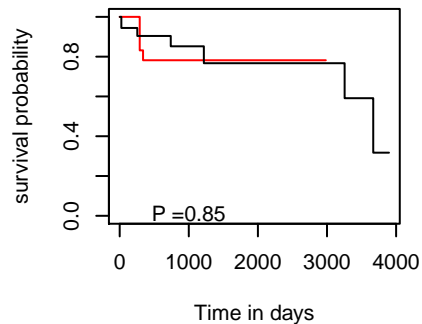**DFI hsa-mir-6805**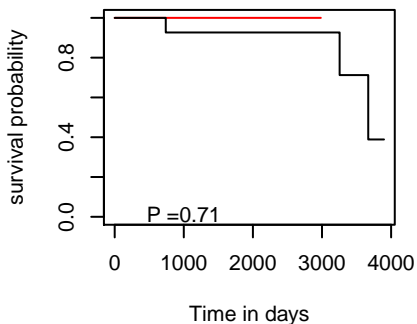**DSS hsa-mir-6805**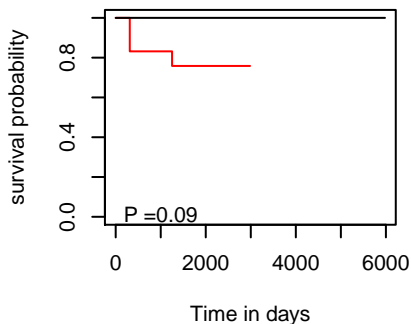**OS hsa-mir-4443**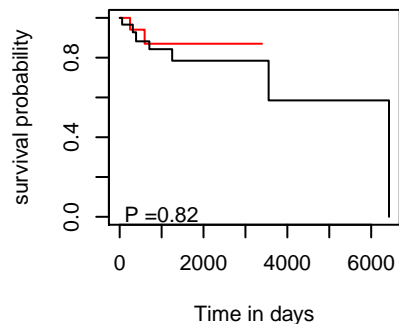**PFI hsa-mir-4443**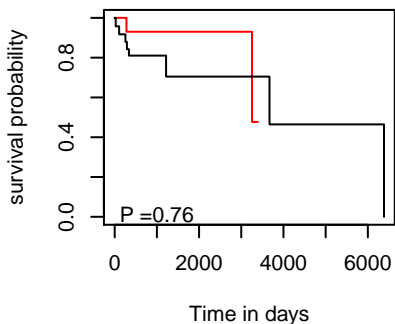**DFI hsa-mir-4443**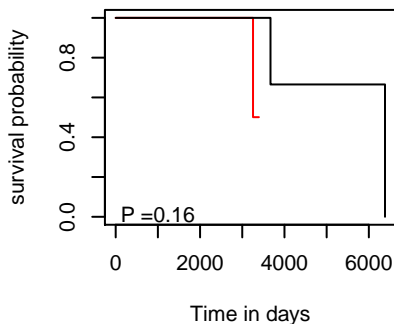**DSS hsa-mir-4443**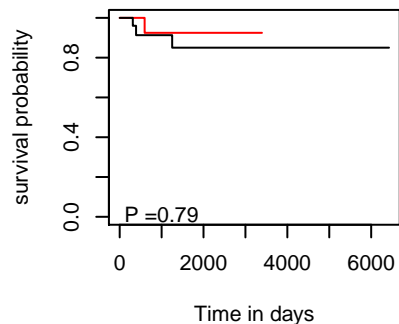

**OS hsa-mir-6891**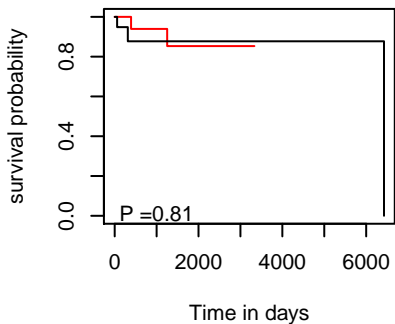**PFI hsa-mir-6891**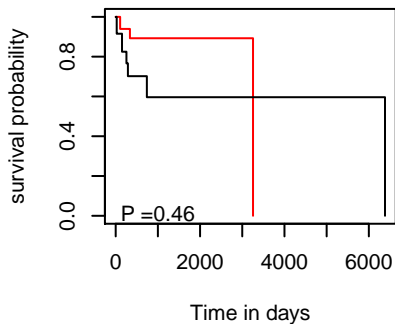**DFI hsa-mir-6891**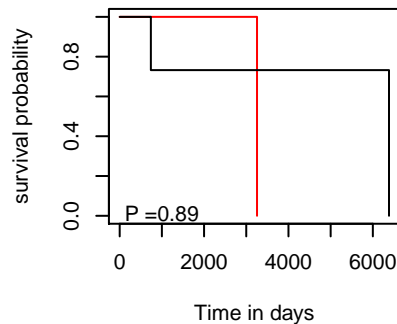**DSS hsa-mir-6891**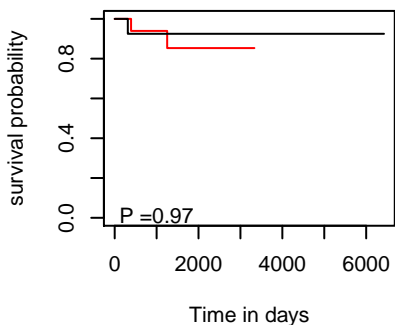**OS hsa-mir-6802**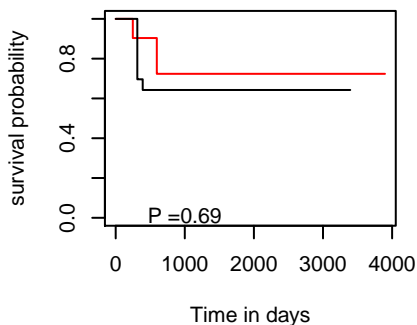**PFI hsa-mir-6802**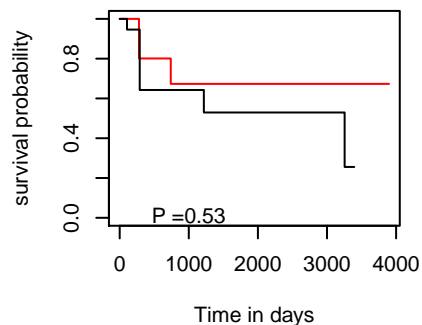**DFI hsa-mir-6802**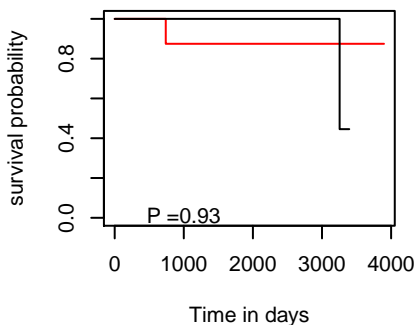**DSS hsa-mir-6802**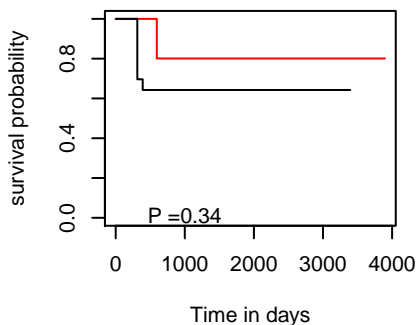**OS hsa-mir-4677**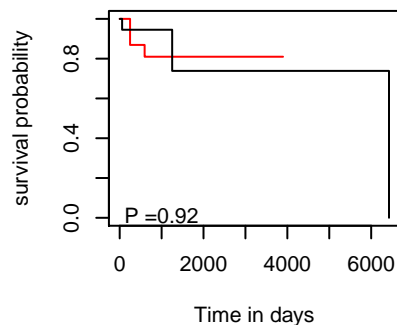

**PFI hsa-mir-4677**

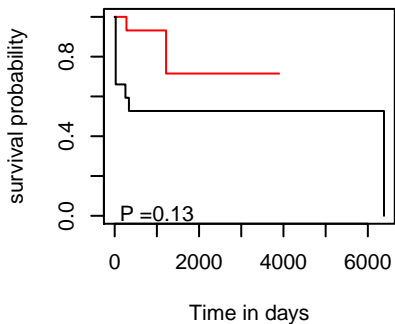

**DFI hsa-mir-4677**

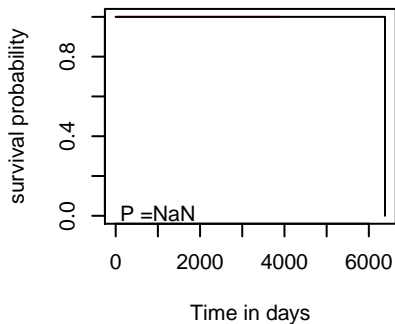

**DSS hsa-mir-4677**

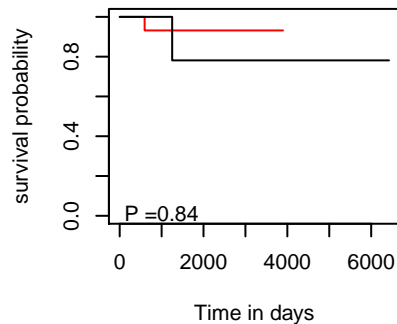

**OS hsa-mir-4773-2**

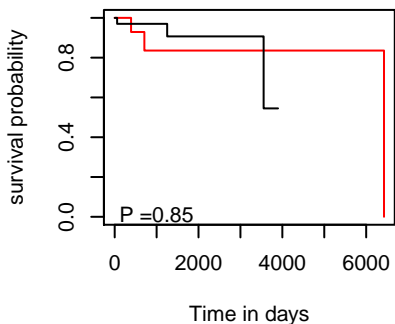

**PFI hsa-mir-4773-2**

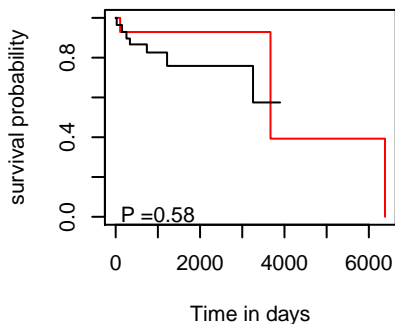

**DFI hsa-mir-4773-2**

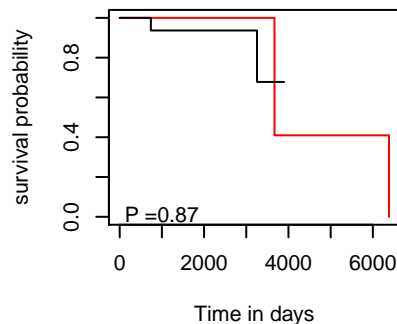

**DSS hsa-mir-4773-2**

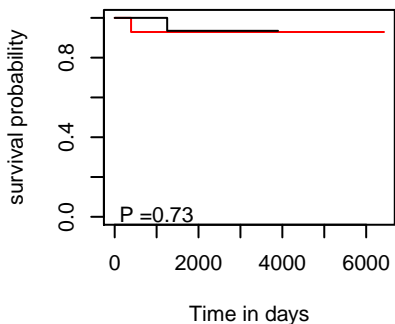

**OS hsa-mir-128-1**

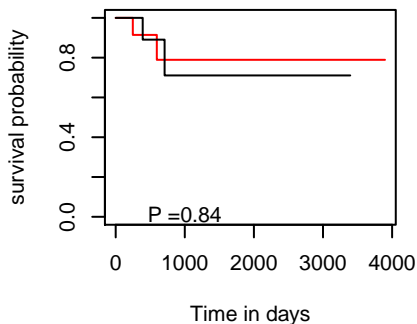

**PFI hsa-mir-128-1**

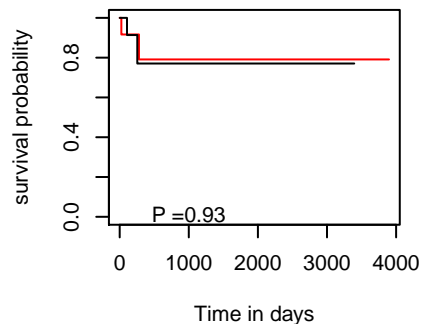

**DFI hsa-mir-128-1**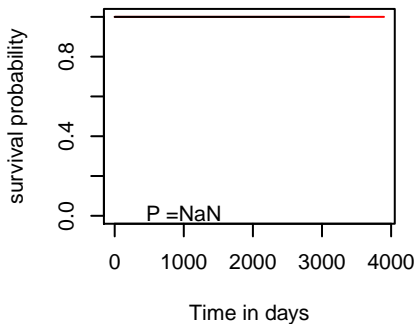**DSS hsa-mir-128-1**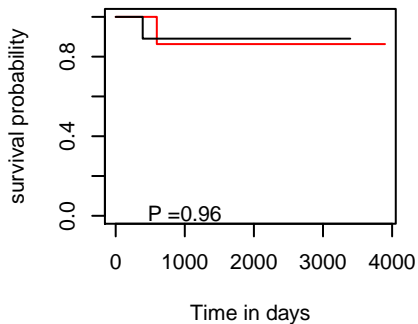**OS hsa-mir-3916**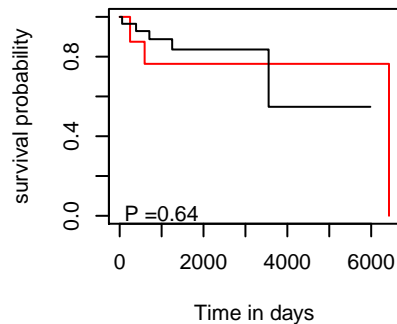**PFI hsa-mir-3916**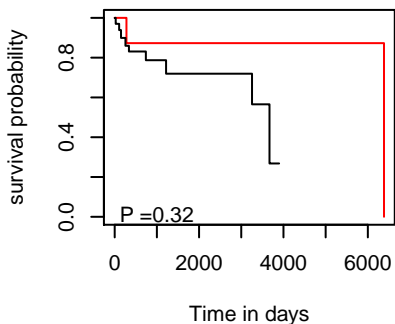**DFI hsa-mir-3916**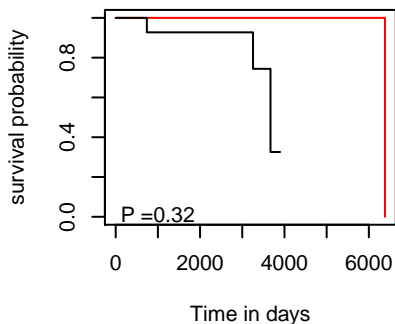**DSS hsa-mir-3916**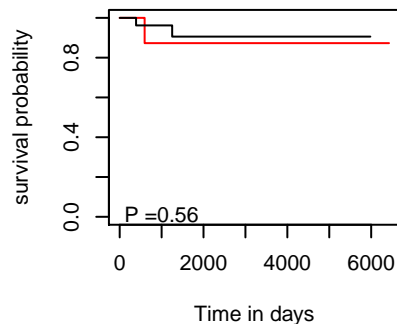**OS hsa-mir-627**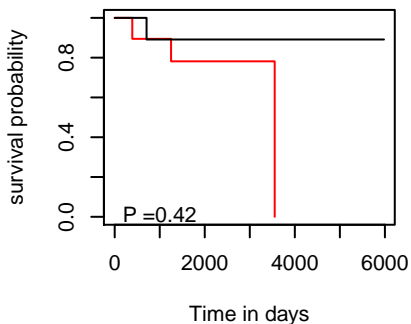**PFI hsa-mir-627**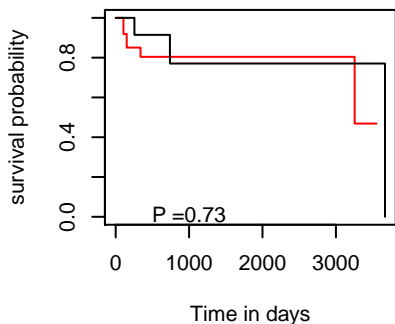**DFI hsa-mir-627**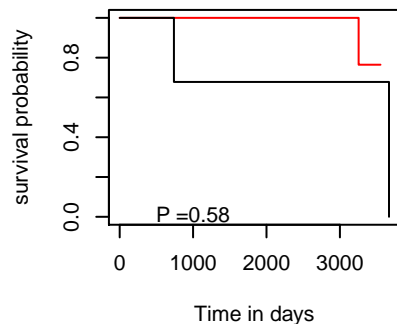

DSS hsa-mir-627

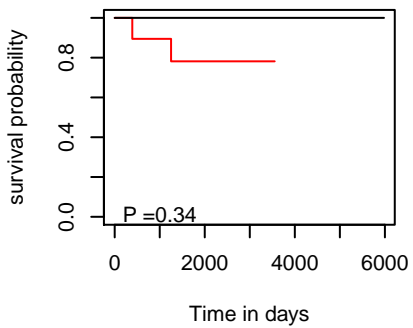

Supplement: MOESM14 [file 41598_2022_7628_MOESM14_ESM.pdf]
