# Supplementary material for: New Thinking on Read-Aloud.
Source: Springer Nature journal article supplement (doi:10.1038/s41598-022-07628-z), 2001-01-01

# Computing microRNA-gene interaction networks in pan-cancer using miRDriver

Banabithi Bose, Matthew Moravec, and Serdar Bozdog

# Supplemental Figure S6

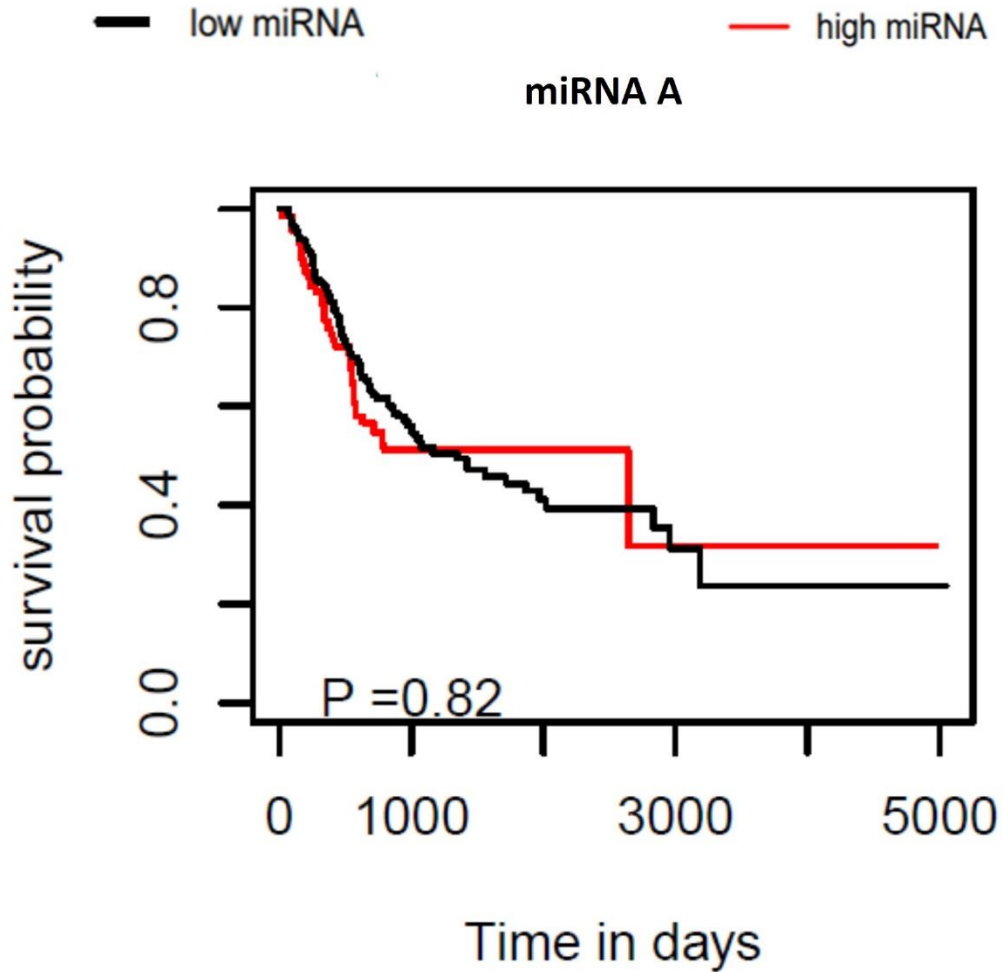

The *Adjusted Kaplan-Meier* survival plots for the computed miRNAs in high and low miRNA expression patient groups.

# Supplemental Figure S6

## Cancer Type: ESCA

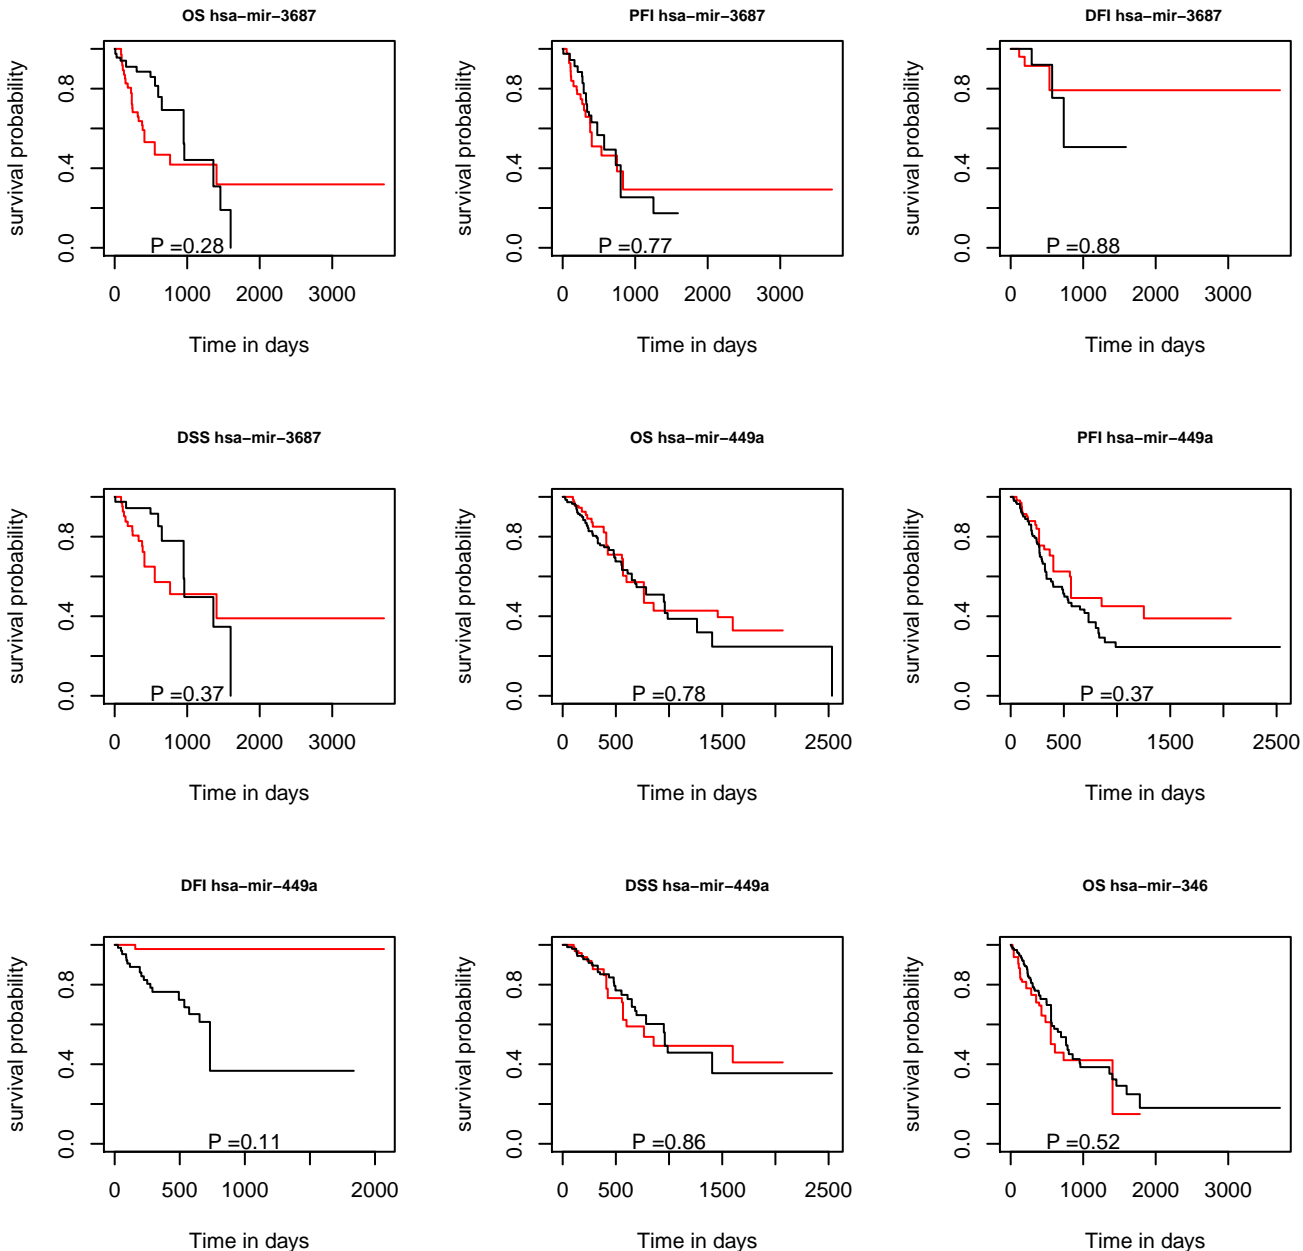

**PFI hsa-mir-346**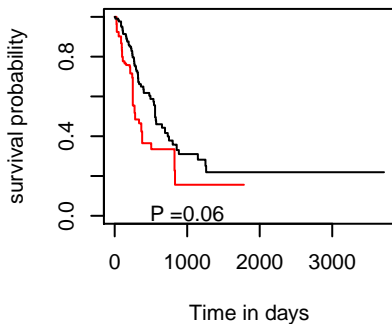**DFI hsa-mir-346**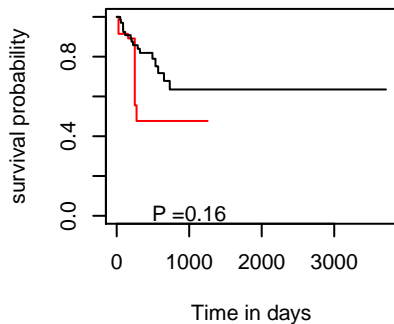**DSS hsa-mir-346**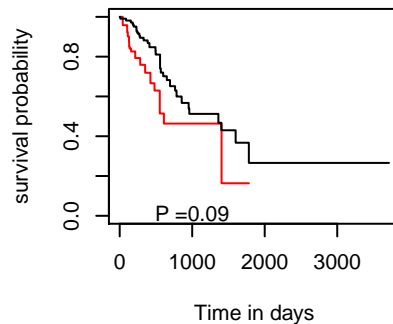**OS hsa-mir-2355**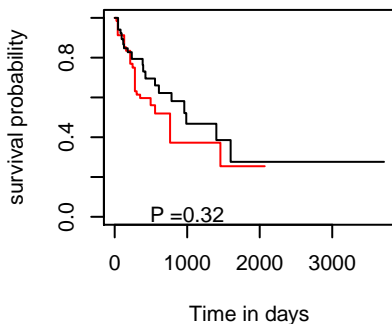**PFI hsa-mir-2355**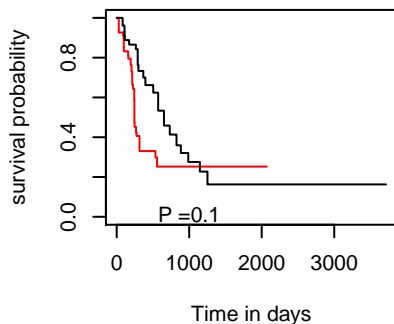**DFI hsa-mir-2355**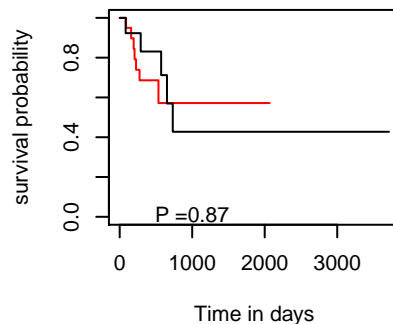**DSS hsa-mir-2355**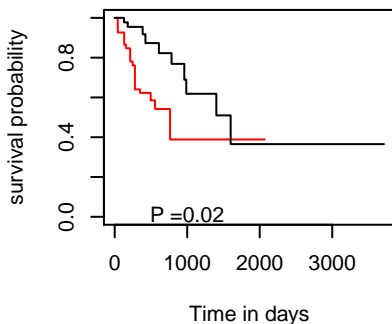**OS hsa-mir-6720**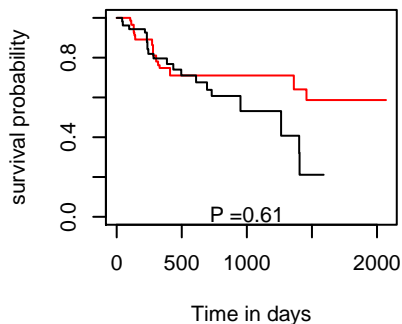**PFI hsa-mir-6720**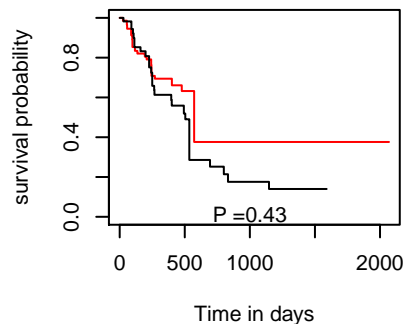

**DFI hsa-mir-6720**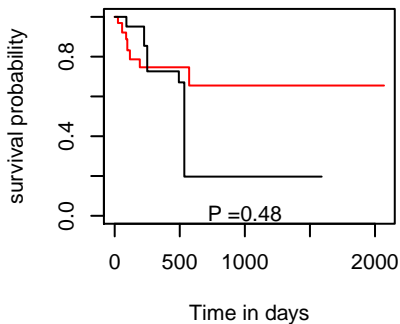**DSS hsa-mir-6720**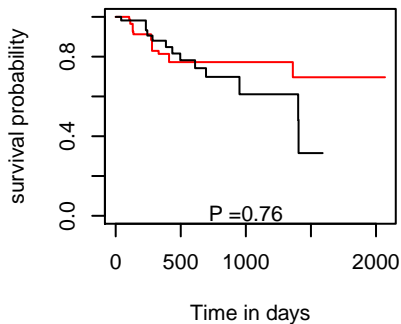**OS hsa-mir-548t**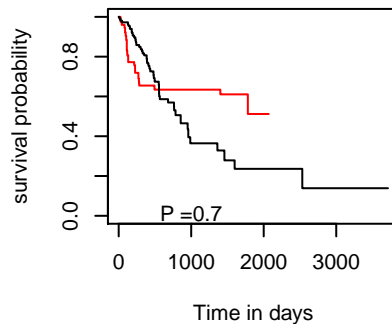**PFI hsa-mir-548t**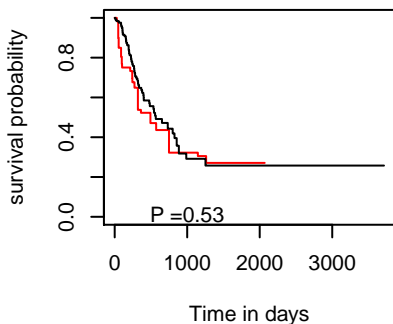**DFI hsa-mir-548t**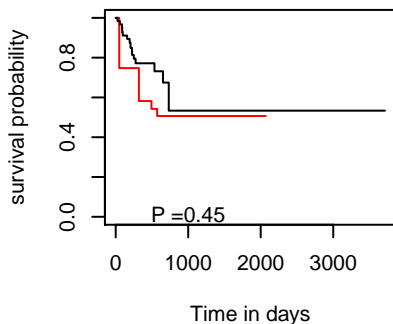**DSS hsa-mir-548t**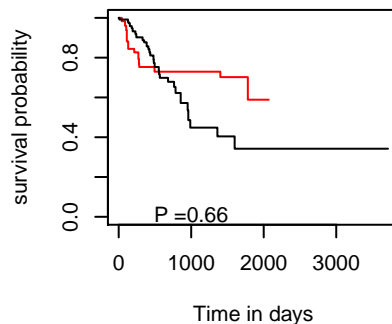**OS hsa-mir-4645**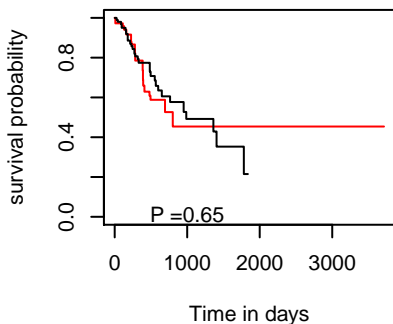**PFI hsa-mir-4645**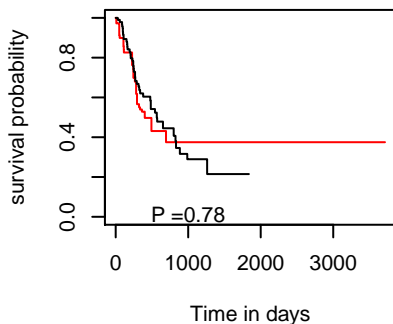**DFI hsa-mir-4645**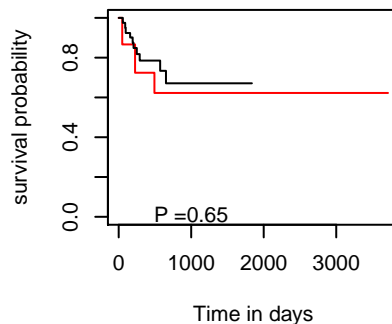

**DSS hsa-mir-4645**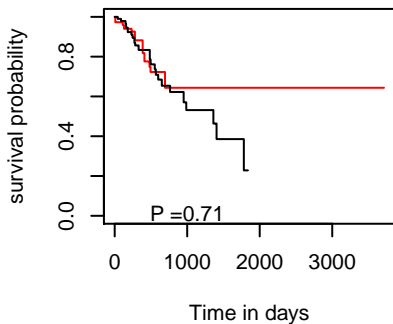**OS hsa-mir-4786**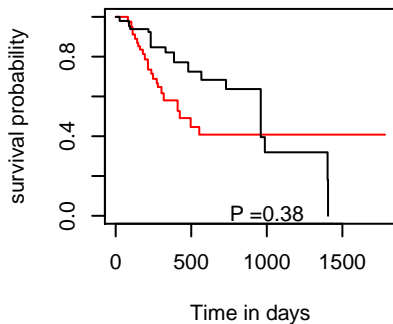**PFI hsa-mir-4786**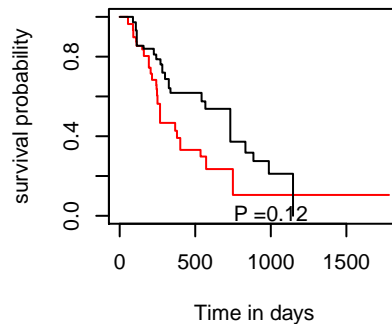**DFI hsa-mir-4786**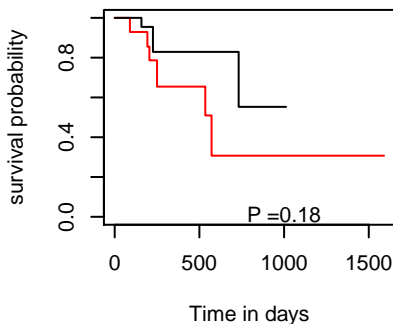**DSS hsa-mir-4786**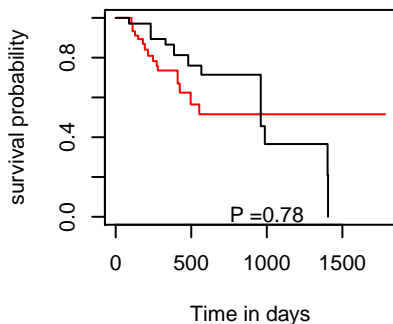**OS hsa-mir-339**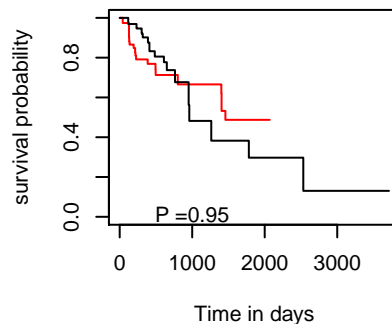**PFI hsa-mir-339**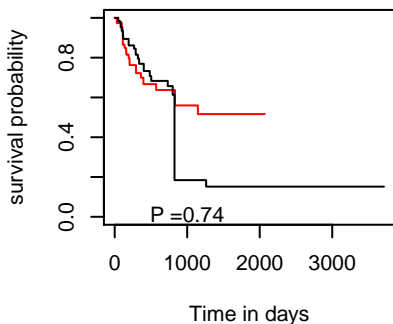**DFI hsa-mir-339**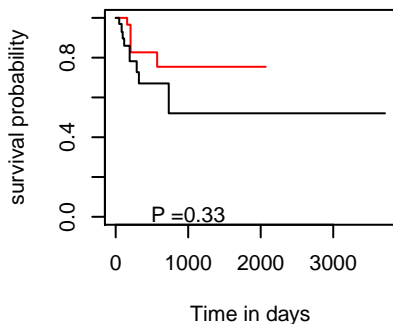**DSS hsa-mir-339**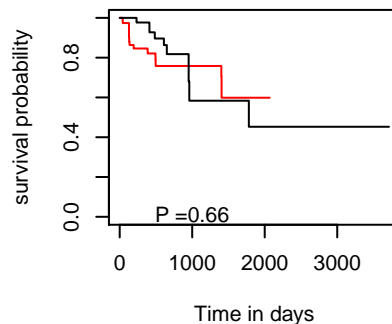

**OS hsa-mir-3176**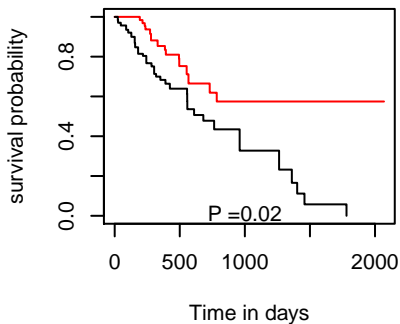**PFI hsa-mir-3176**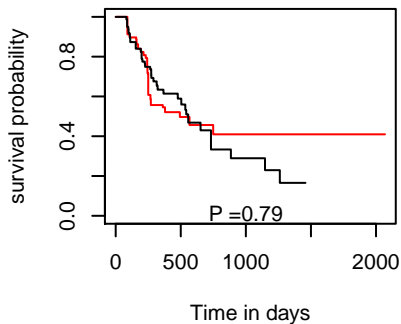**DFI hsa-mir-3176**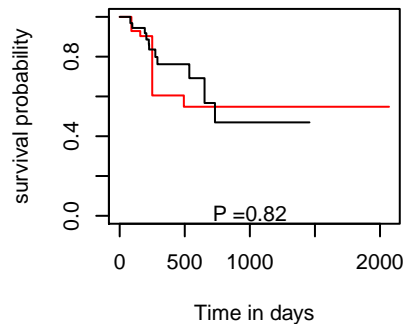**DSS hsa-mir-3176**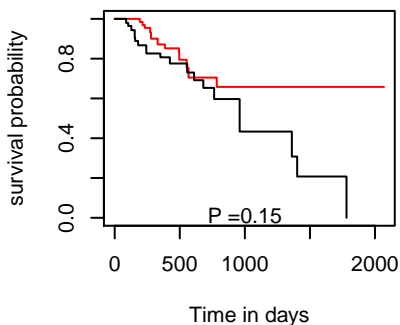**OS hsa-mir-139**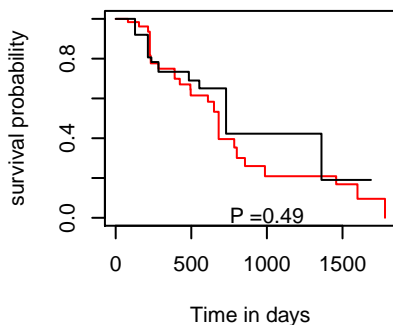**PFI hsa-mir-139**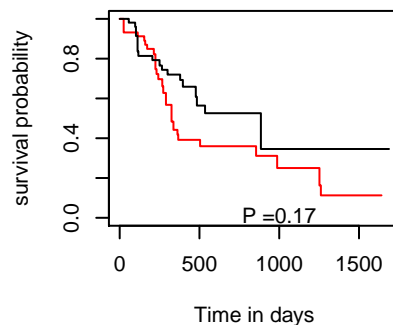**DFI hsa-mir-139**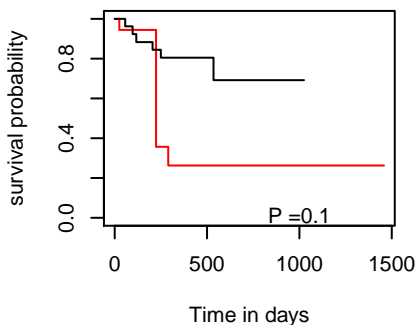**DSS hsa-mir-139**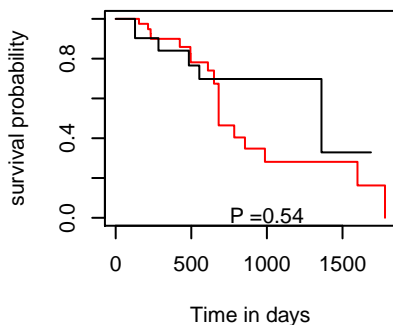**OS hsa-mir-5001**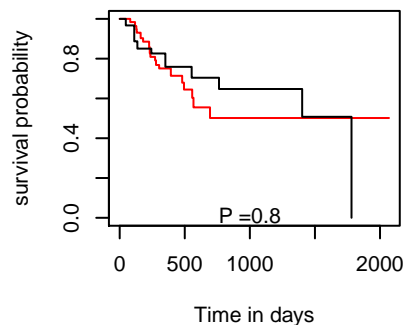

**PFI hsa-mir-5001**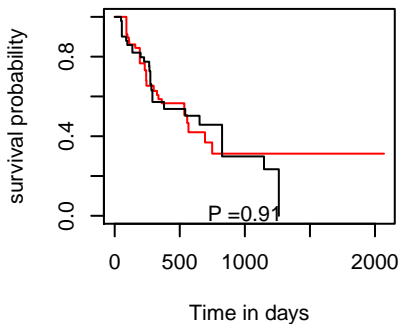**DFI hsa-mir-5001**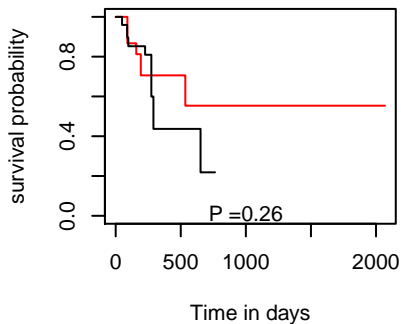**DSS hsa-mir-5001**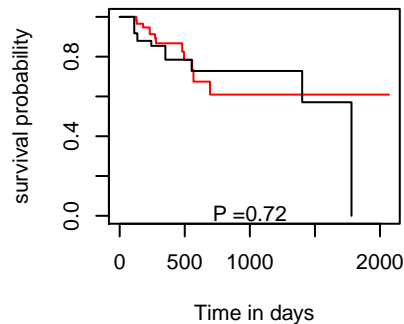**OS hsa-mir-5687**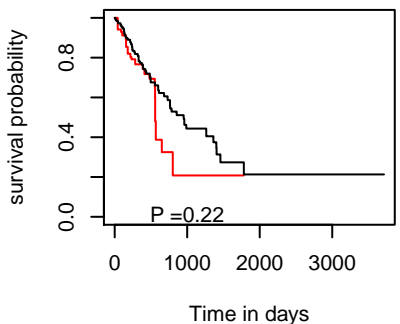**PFI hsa-mir-5687**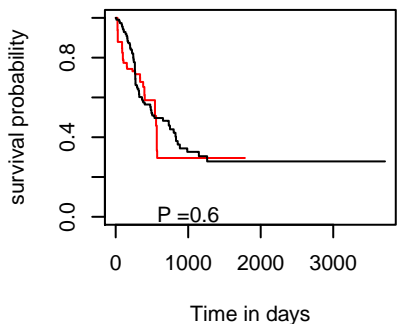**DFI hsa-mir-5687**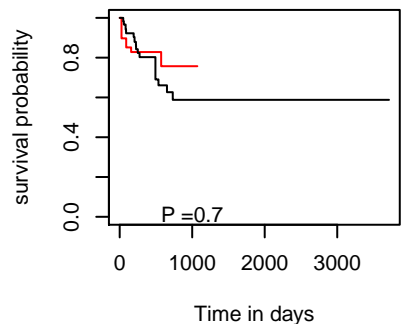**DSS hsa-mir-5687**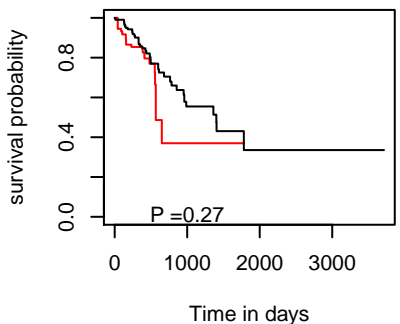**OS hsa-mir-581**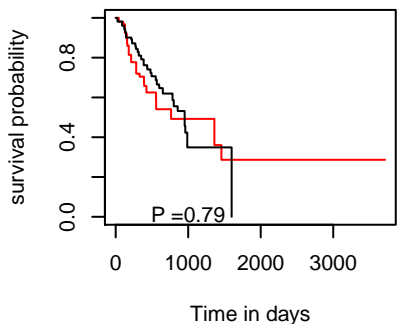**PFI hsa-mir-581**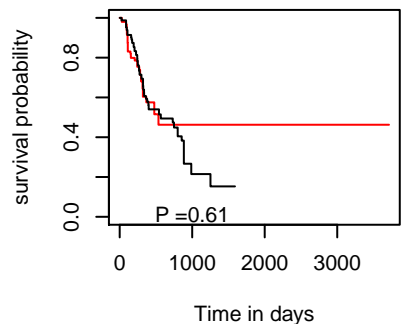

**DFI hsa-mir-581**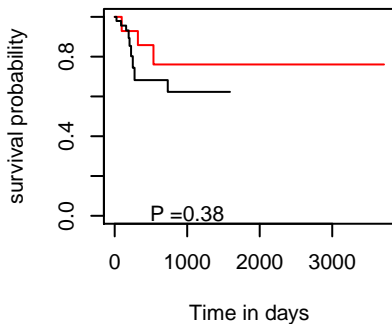**DSS hsa-mir-581**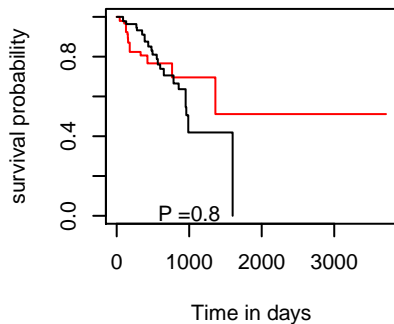**OS hsa-mir-582**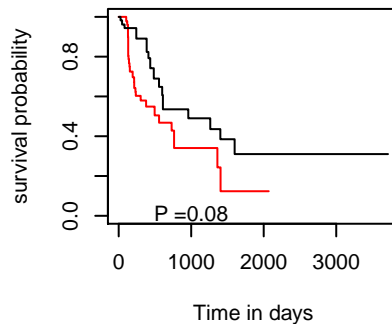**PFI hsa-mir-582**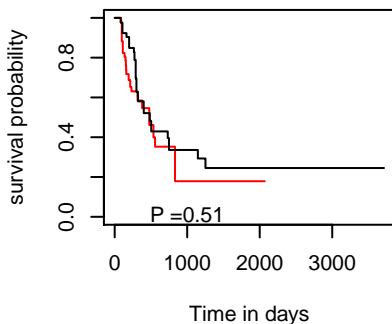**DFI hsa-mir-582**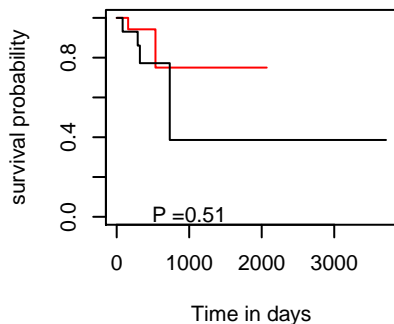**DSS hsa-mir-582**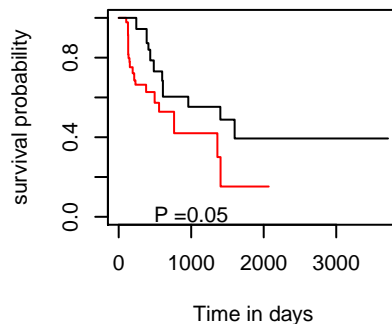**OS hsa-mir-6501**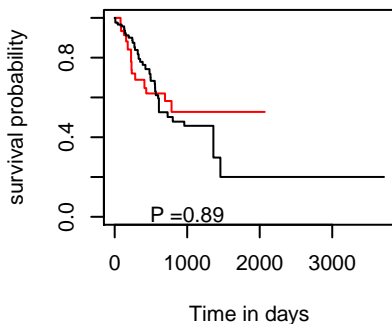**PFI hsa-mir-6501**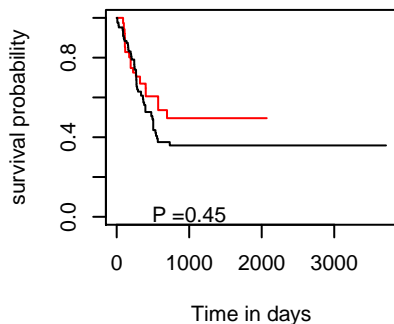**DFI hsa-mir-6501**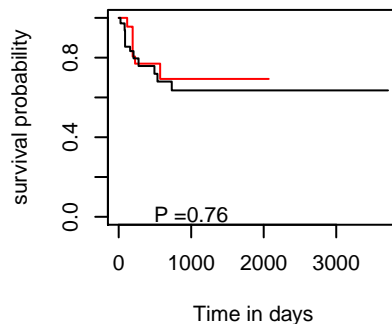

**DSS hsa-mir-6501**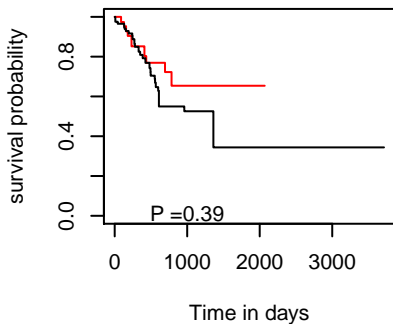**OS hsa-mir-320c-2**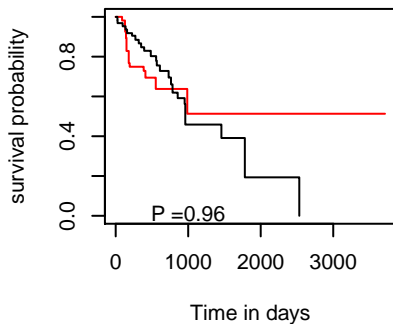**PFI hsa-mir-320c-2**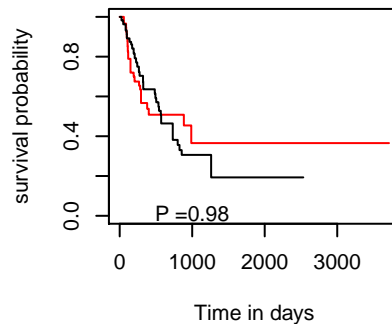**DFI hsa-mir-320c-2**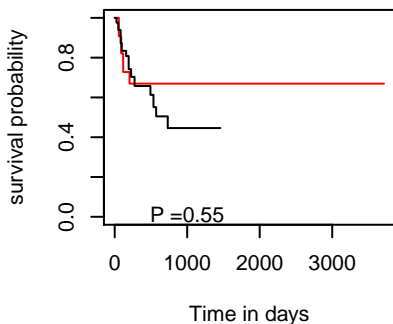**DSS hsa-mir-320c-2**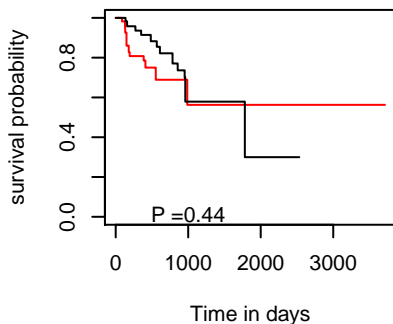**OS hsa-mir-3926-2**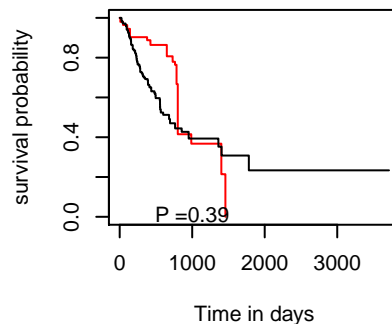**PFI hsa-mir-3926-2**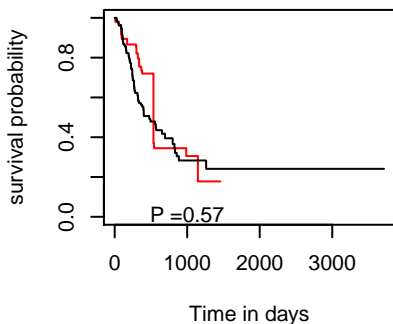**DFI hsa-mir-3926-2**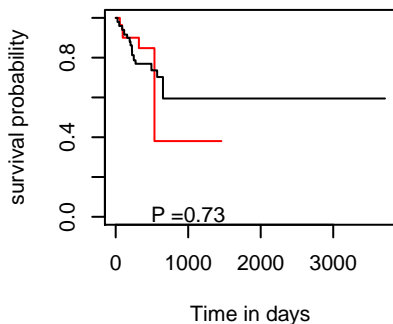**DSS hsa-mir-3926-2**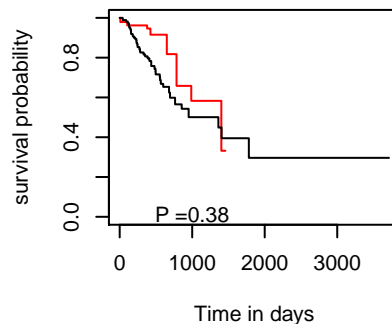

**OS hsa-mir-3926-1**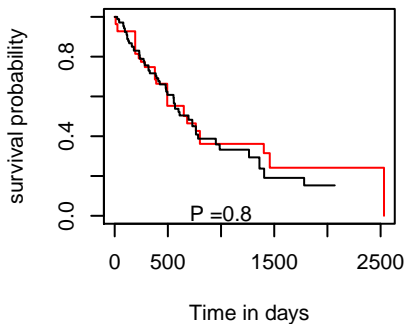**PFI hsa-mir-3926-1**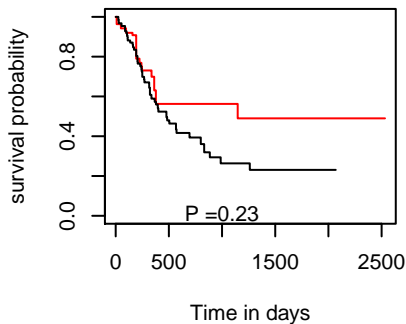**DFI hsa-mir-3926-1**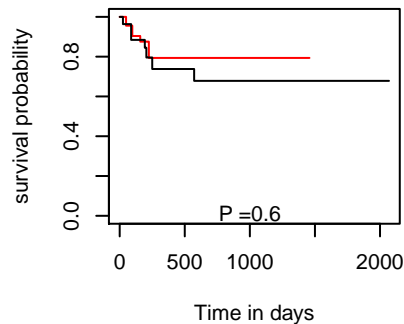**DSS hsa-mir-3926-1**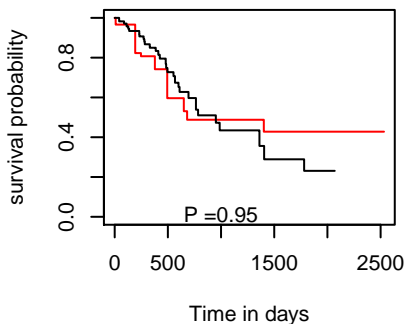**OS hsa-mir-4676**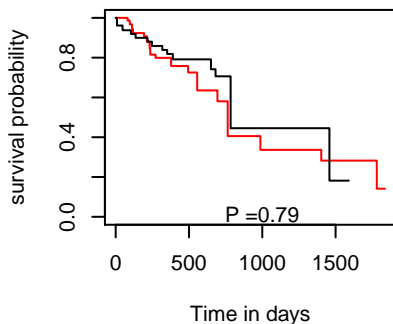**PFI hsa-mir-4676**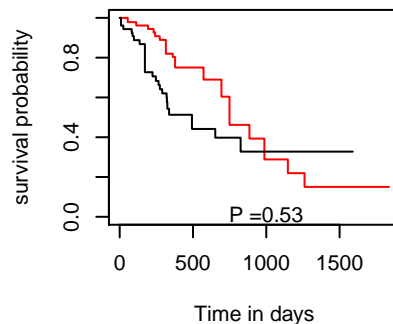**DFI hsa-mir-4676**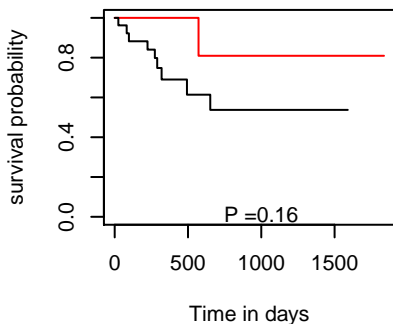**DSS hsa-mir-4676**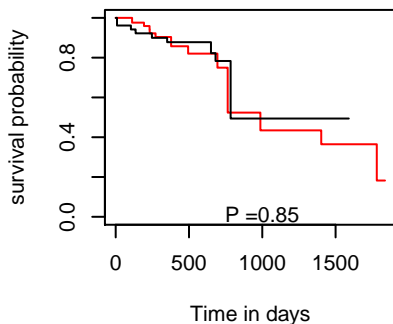**OS hsa-mir-3662**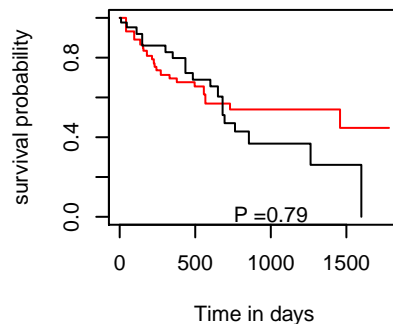

**PFI hsa-mir-3662**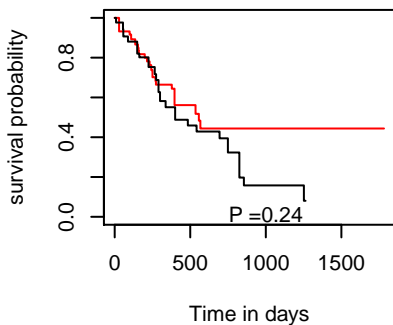**DFI hsa-mir-3662**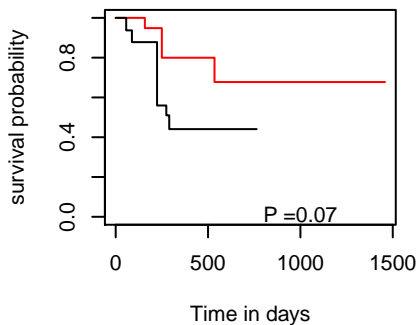**DSS hsa-mir-3662**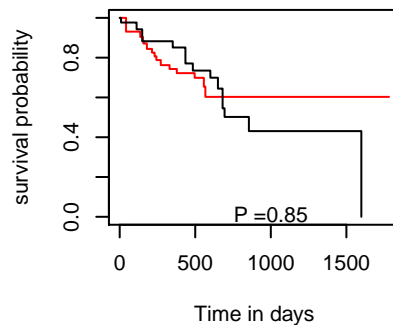**OS hsa-mir-34c**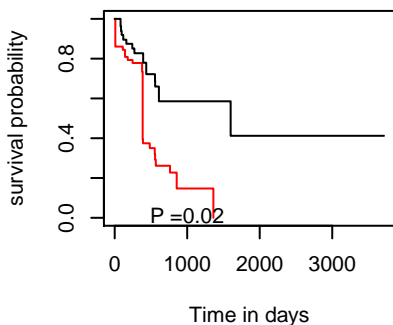**PFI hsa-mir-34c**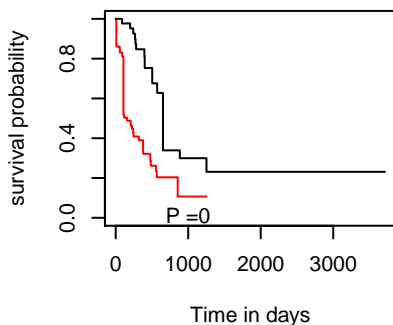**DFI hsa-mir-34c**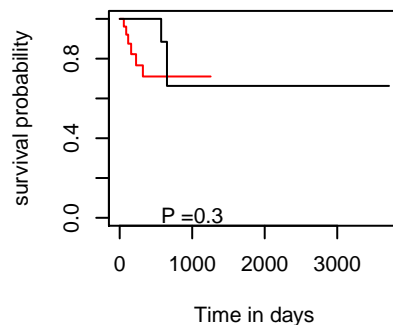**DSS hsa-mir-34c**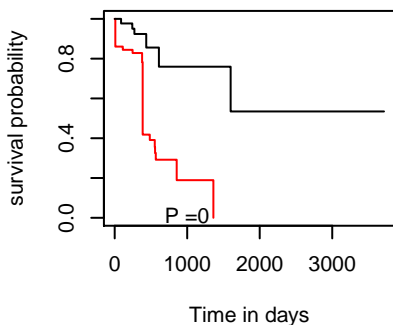**OS hsa-mir-3648**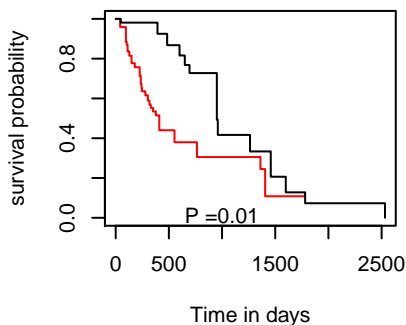**PFI hsa-mir-3648**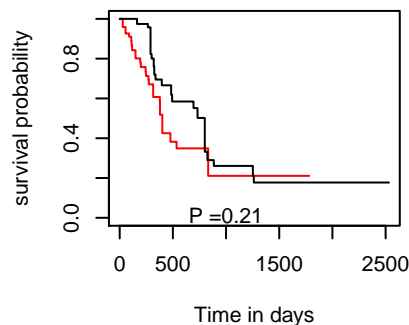

**DFI hsa-mir-3648**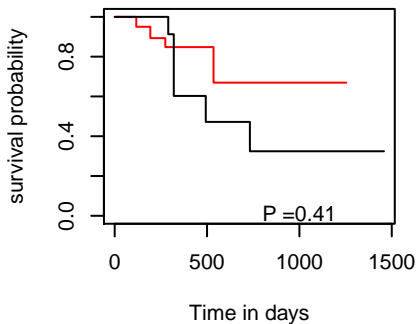**DSS hsa-mir-3648**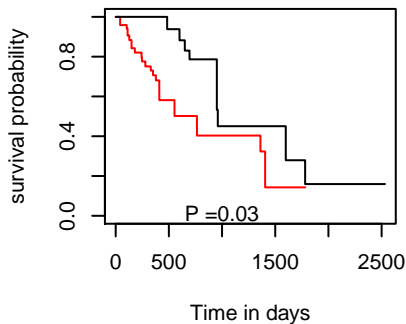**OS hsa-mir-1343**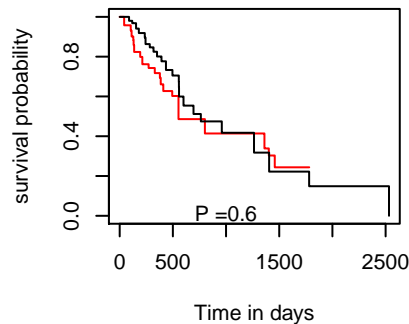**PFI hsa-mir-1343**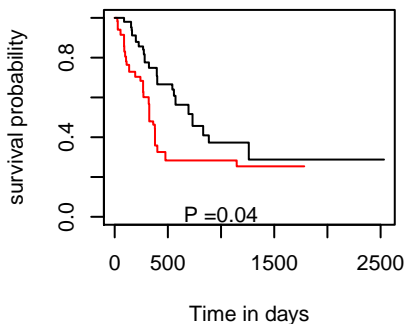**DFI hsa-mir-1343**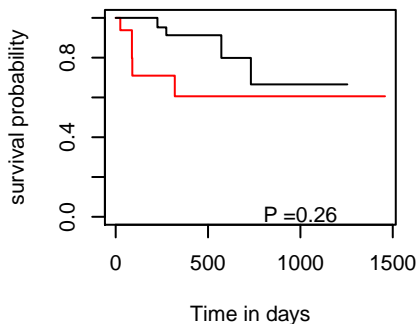**DSS hsa-mir-1343**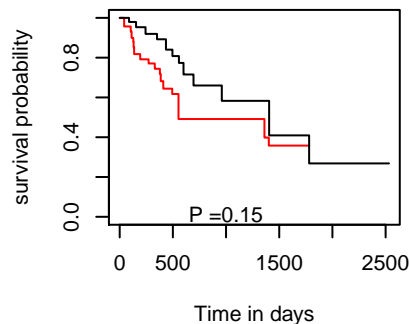**OS hsa-mir-6513**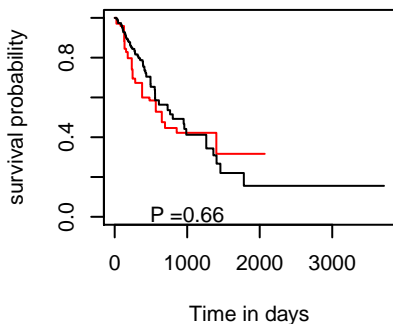**PFI hsa-mir-6513**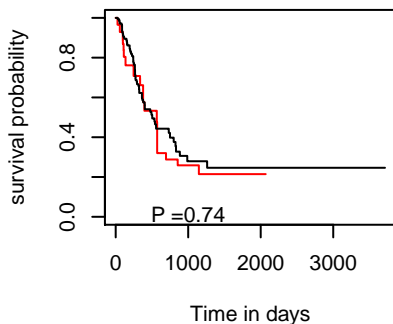**DFI hsa-mir-6513**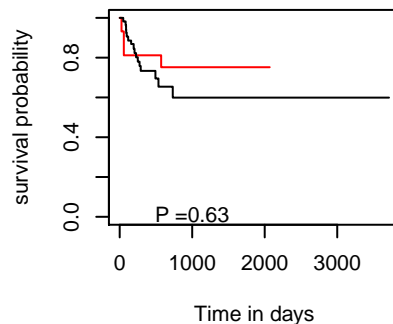

**DSS hsa-mir-6513**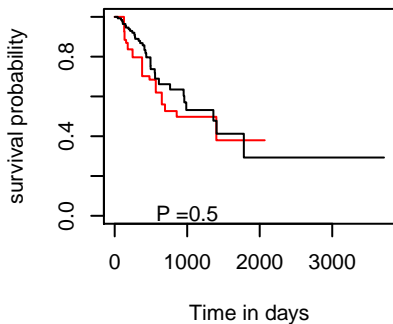**OS hsa-mir-4658**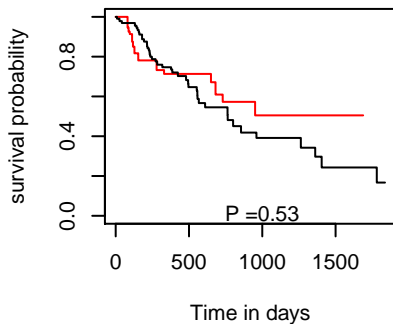**PFI hsa-mir-4658**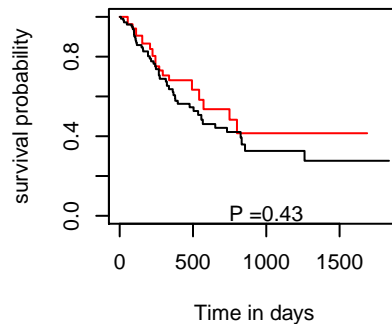**DFI hsa-mir-4658**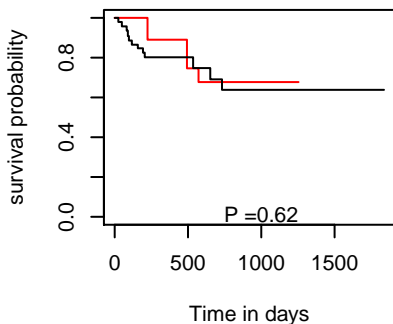**DSS hsa-mir-4658**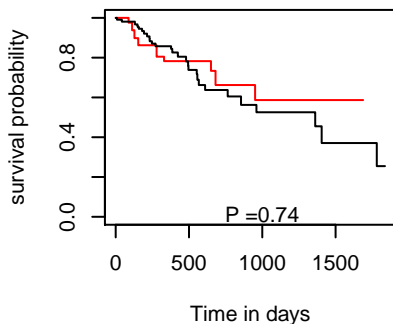**OS hsa-mir-5090**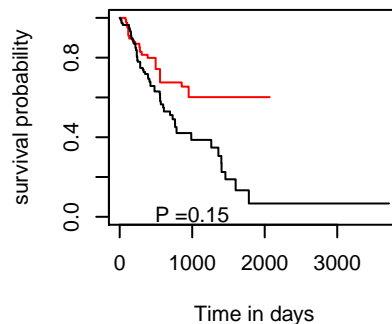**PFI hsa-mir-5090**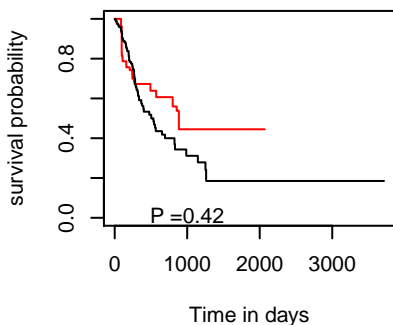**DFI hsa-mir-5090**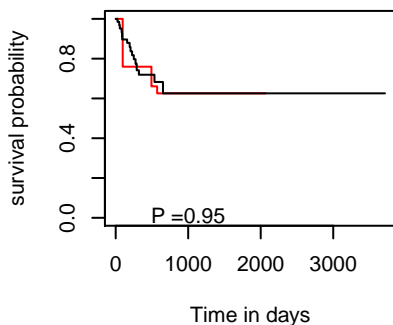**DSS hsa-mir-5090**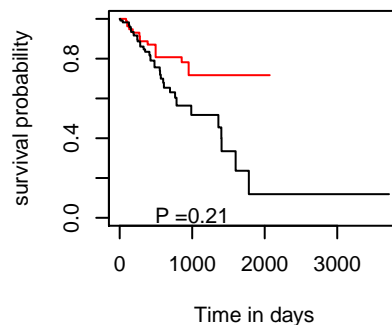

**OS hsa-mir-483**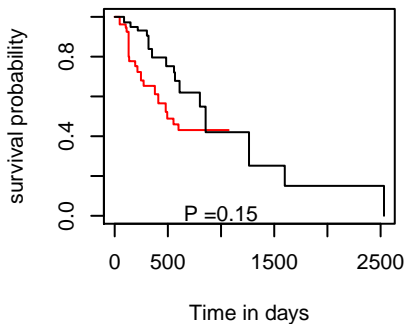**PFI hsa-mir-483**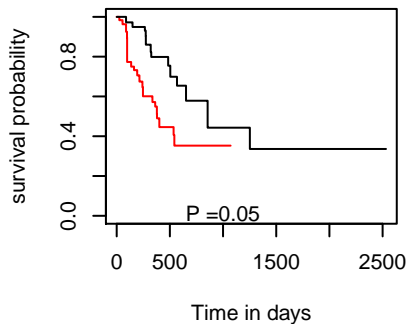**DFI hsa-mir-483**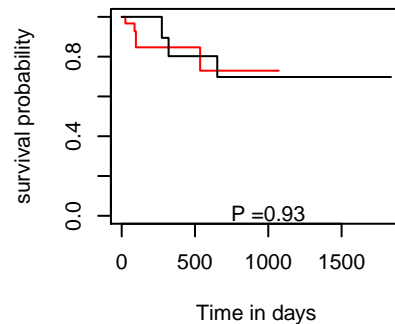**DSS hsa-mir-483**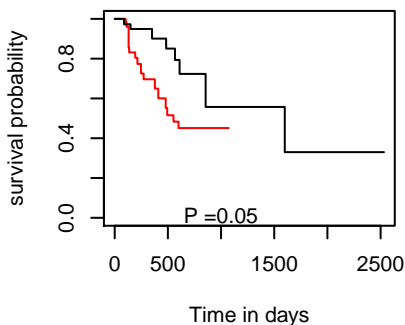**OS hsa-mir-4680**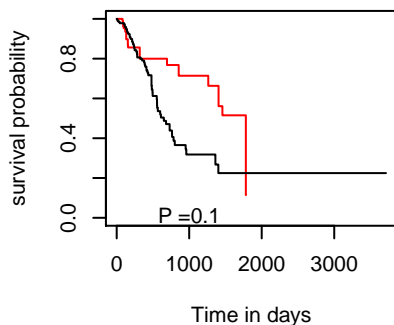**PFI hsa-mir-4680**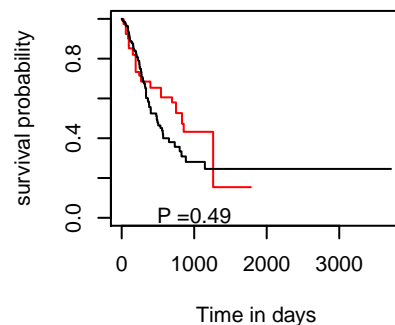**DFI hsa-mir-4680**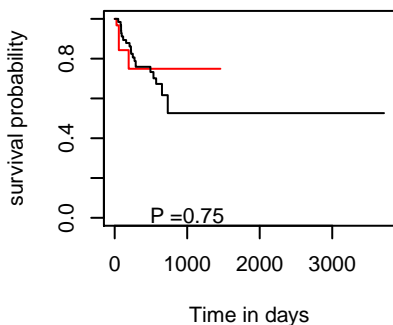**DSS hsa-mir-4680**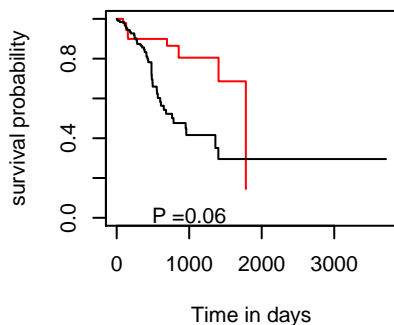**OS hsa-mir-210**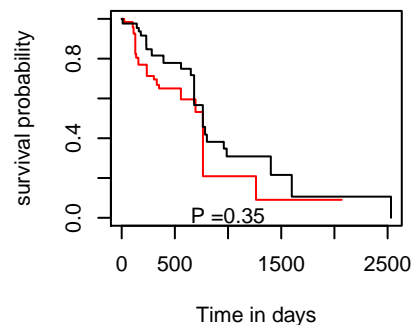

**PFI hsa-mir-210**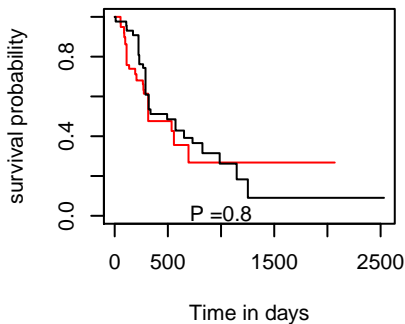**DFI hsa-mir-210**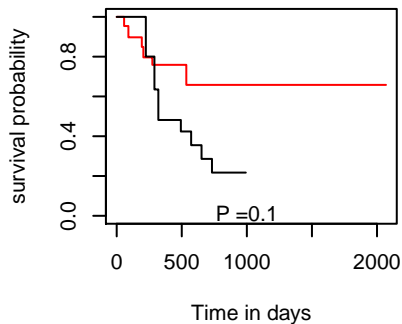**DSS hsa-mir-210**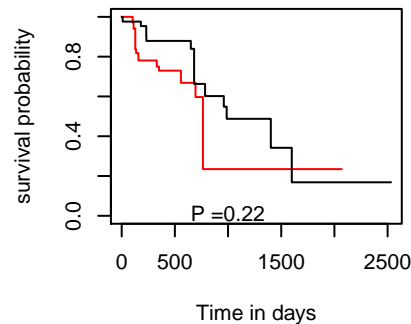**OS hsa-mir-5683**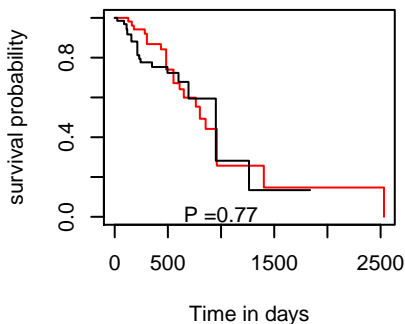**PFI hsa-mir-5683**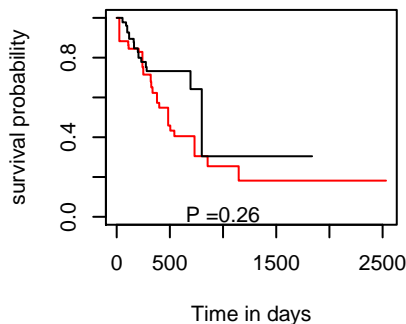**DFI hsa-mir-5683**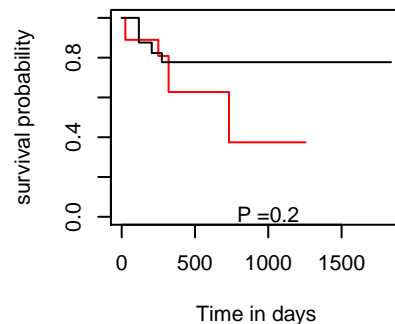**DSS hsa-mir-5683**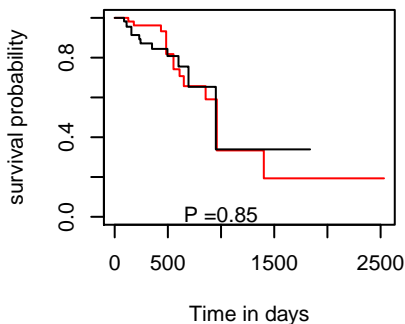**OS hsa-mir-3131**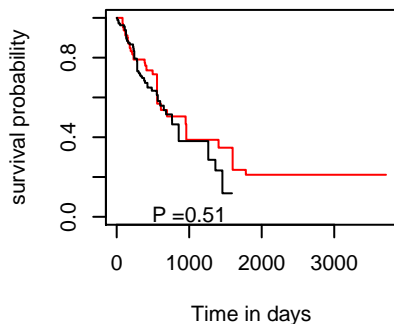**PFI hsa-mir-3131**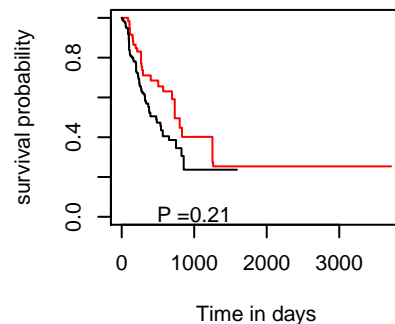

**DFI hsa-mir-3131**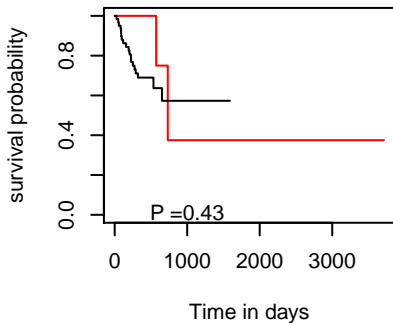**DSS hsa-mir-3131**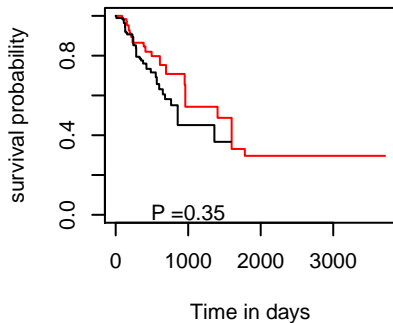**OS hsa-mir-5094**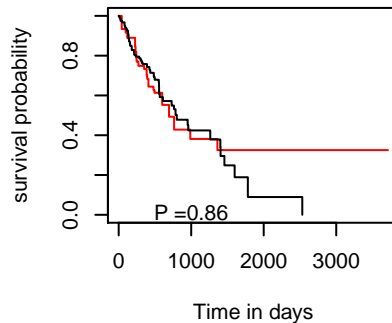**PFI hsa-mir-5094**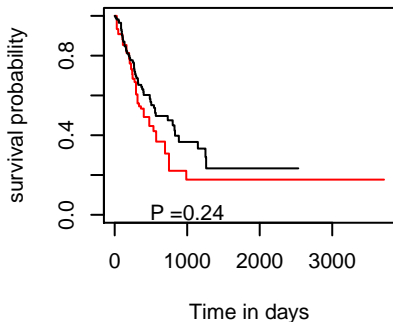**DFI hsa-mir-5094**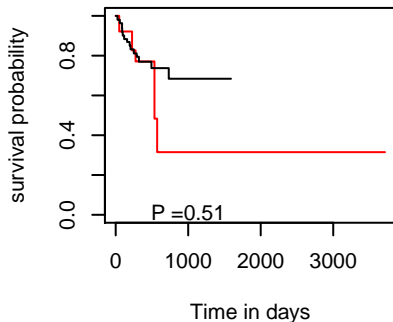**DSS hsa-mir-5094**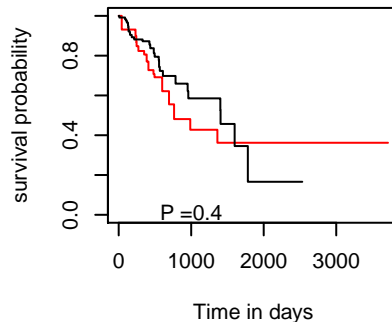**OS hsa-mir-6852**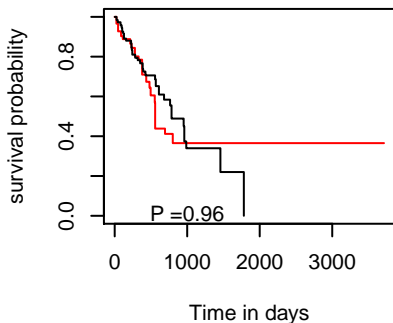**PFI hsa-mir-6852**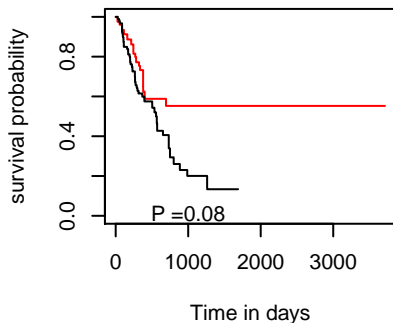**DFI hsa-mir-6852**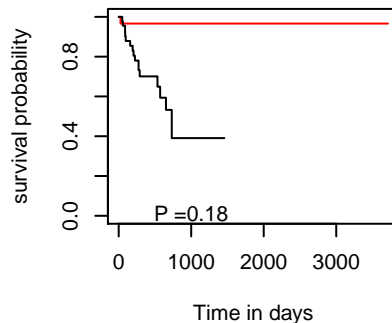

DSS hsa-mir-6852

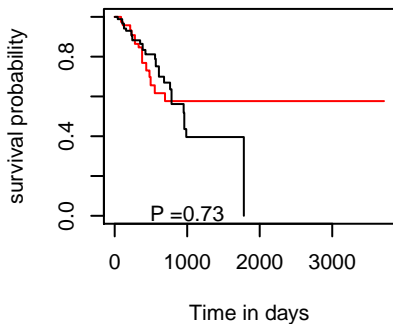

OS hsa-mir-3913-1

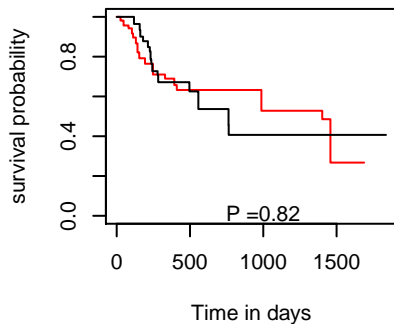

PFI hsa-mir-3913-1

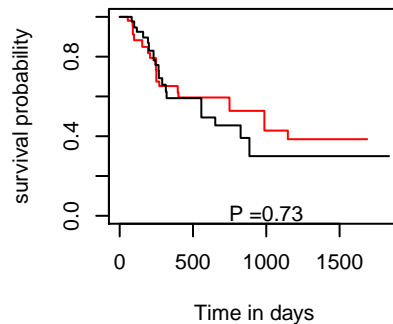

DFI hsa-mir-3913-1

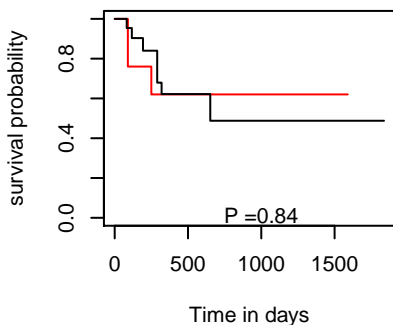

DSS hsa-mir-3913-1

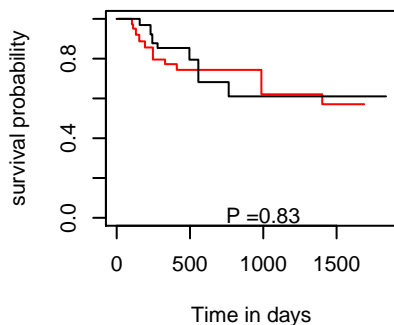

OS hsa-mir-3664

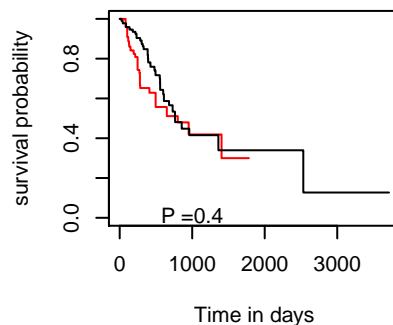

PFI hsa-mir-3664

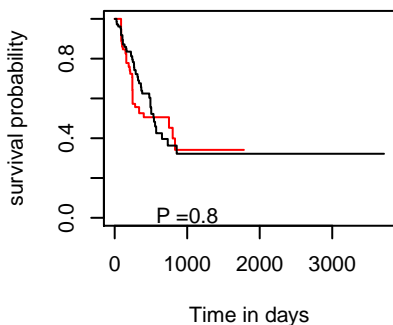

DFI hsa-mir-3664

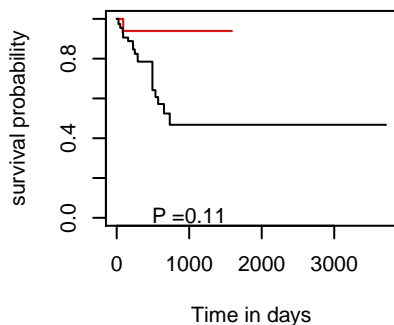

DSS hsa-mir-3664

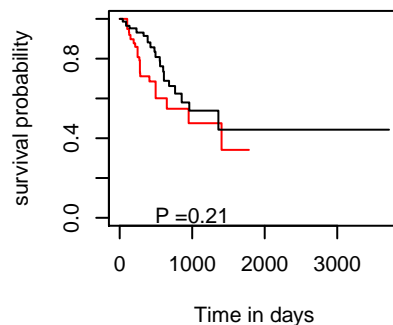

**OS hsa-mir-675**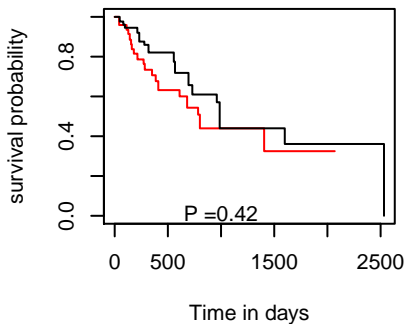**PFI hsa-mir-675**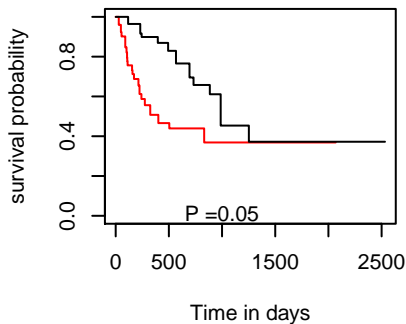**DFI hsa-mir-675**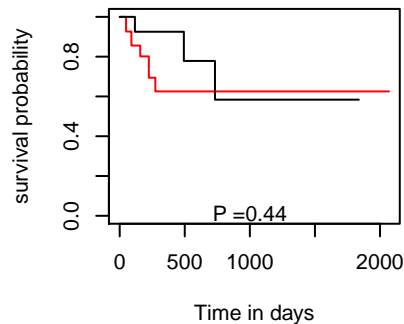**DSS hsa-mir-675**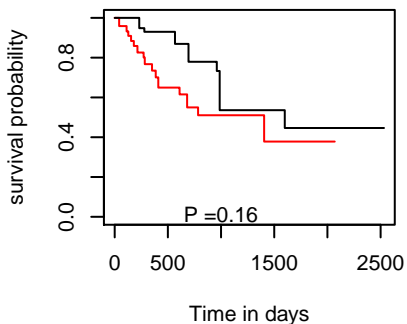**OS hsa-mir-34a**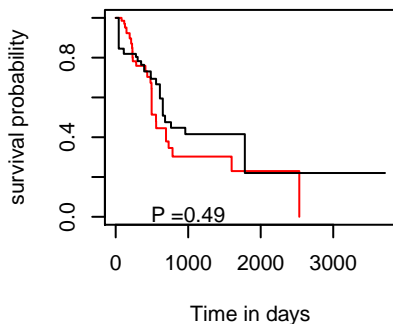**PFI hsa-mir-34a**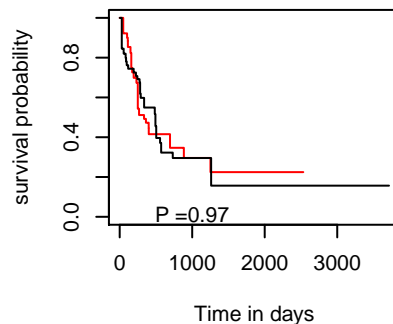**DFI hsa-mir-34a**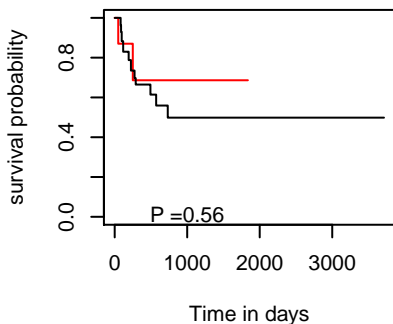**DSS hsa-mir-34a**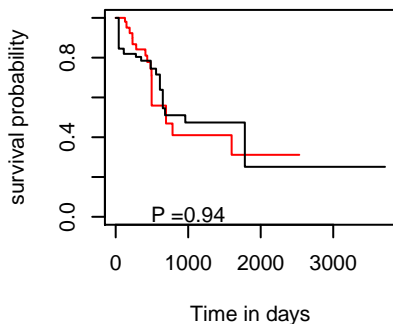**OS hsa-mir-6728**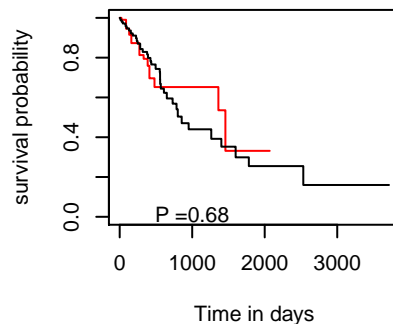

**PFI hsa-mir-6728**

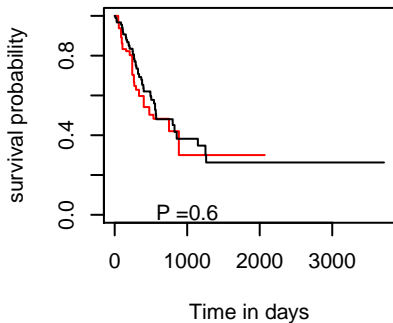

**DFI hsa-mir-6728**

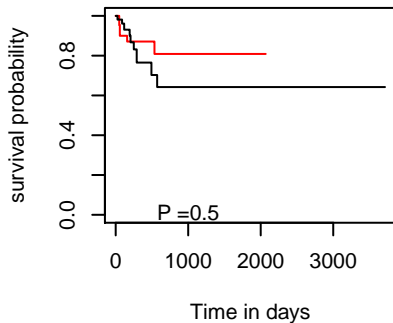

**DSS hsa-mir-6728**

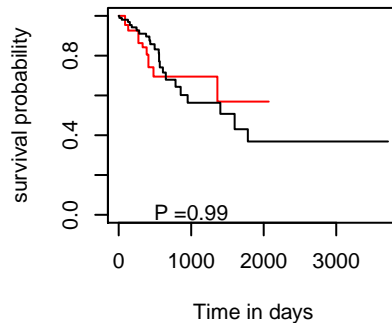

**OS hsa-mir-30c-1**

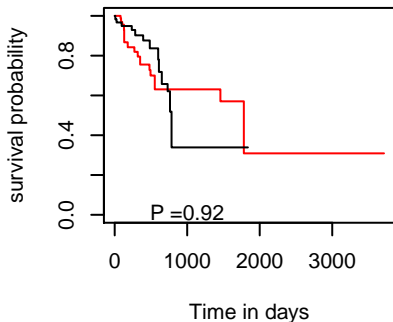

**PFI hsa-mir-30c-1**

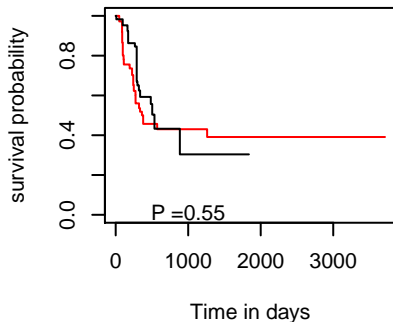

**DFI hsa-mir-30c-1**

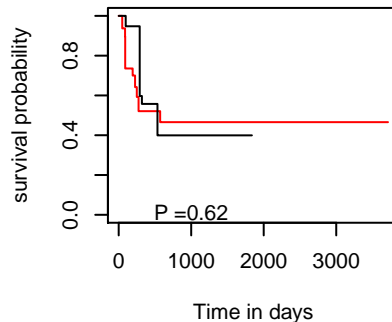

**DSS hsa-mir-30c-1**

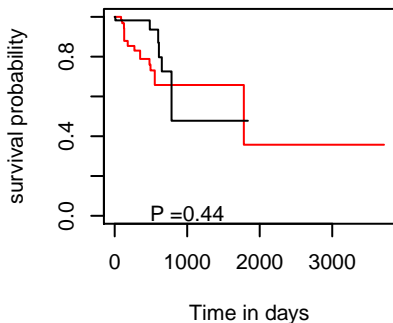

**OS hsa-mir-5703**

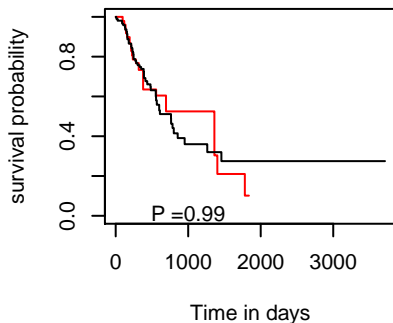

**PFI hsa-mir-5703**

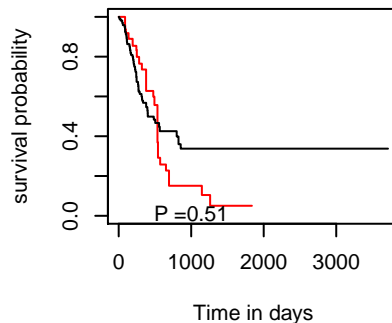

**DFI hsa-mir-5703**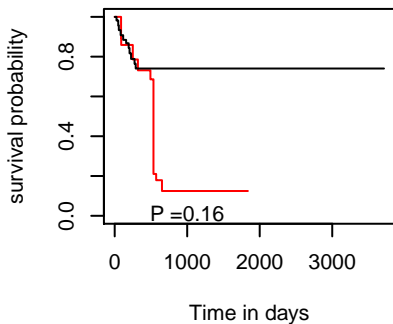**DSS hsa-mir-5703**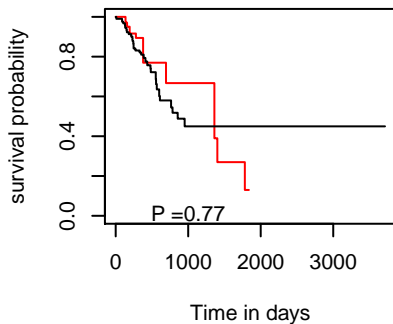**OS hsa-mir-9-3**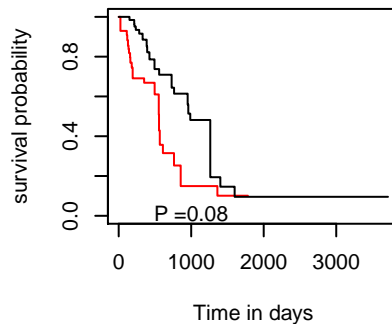**PFI hsa-mir-9-3**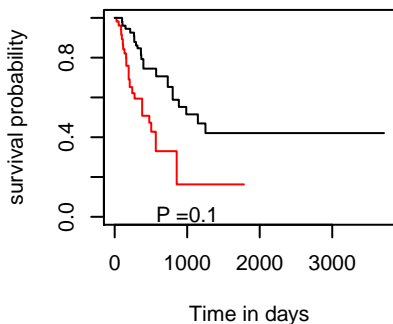**DFI hsa-mir-9-3**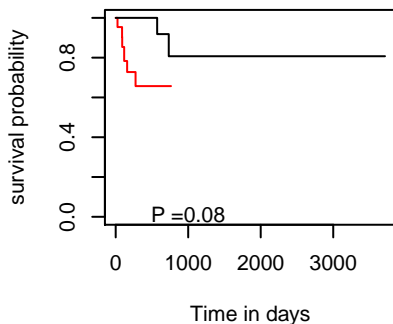**DSS hsa-mir-9-3**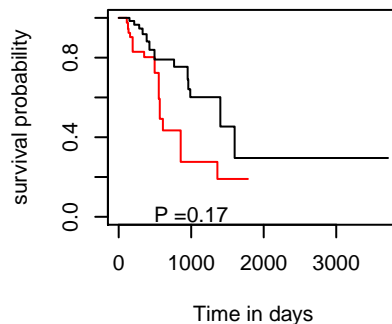**OS hsa-mir-6516**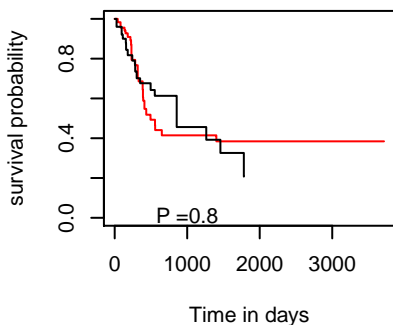**PFI hsa-mir-6516**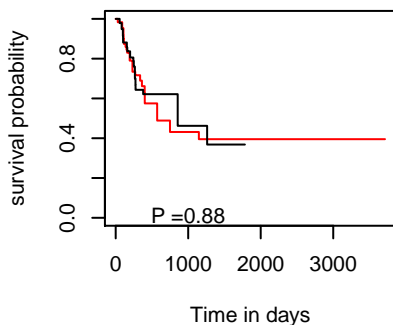**DFI hsa-mir-6516**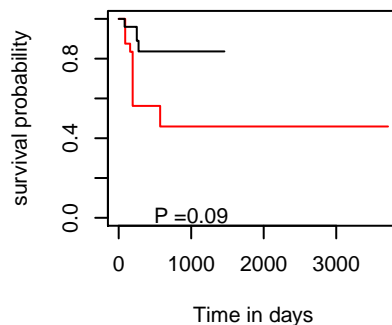

**DSS hsa-mir-6516**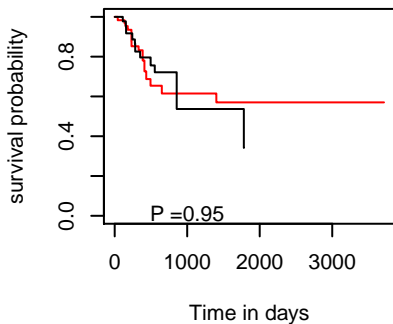**OS hsa-mir-26b**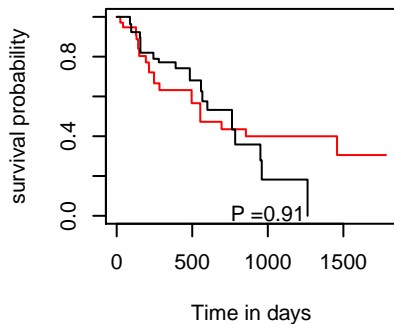**PFI hsa-mir-26b**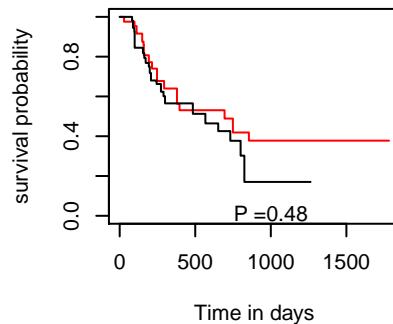**DFI hsa-mir-26b**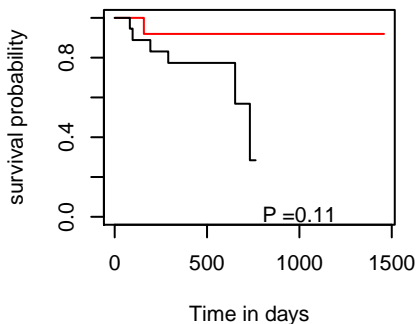**DSS hsa-mir-26b**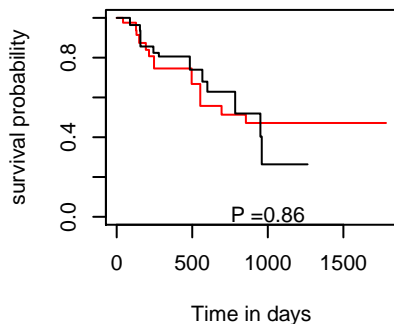**OS hsa-mir-375**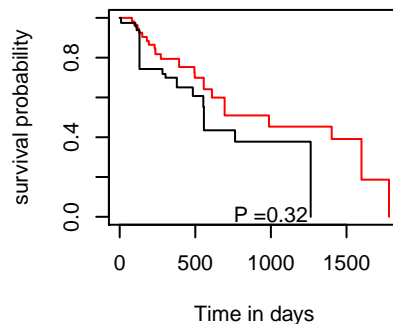**PFI hsa-mir-375**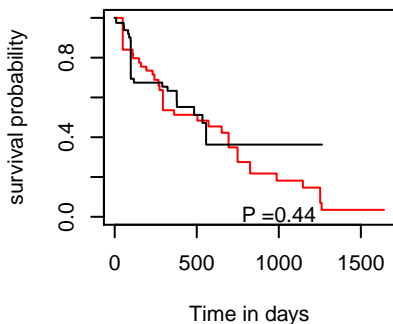**DFI hsa-mir-375**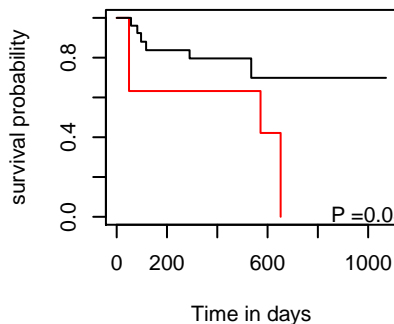**DSS hsa-mir-375**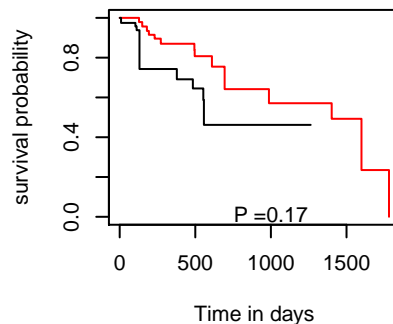

**OS hsa-mir-6781**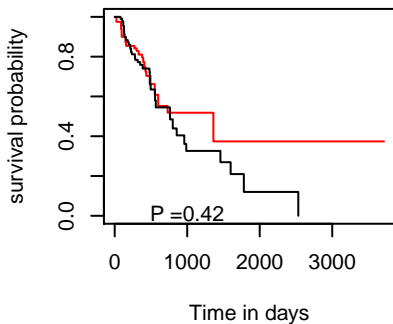**PFI hsa-mir-6781**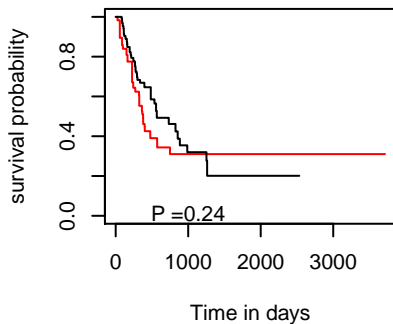**DFI hsa-mir-6781**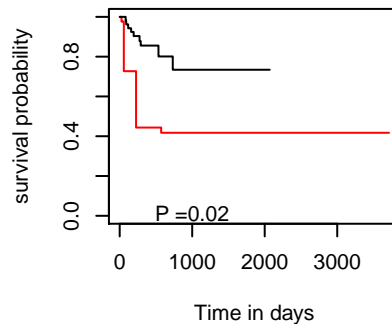**DSS hsa-mir-6781**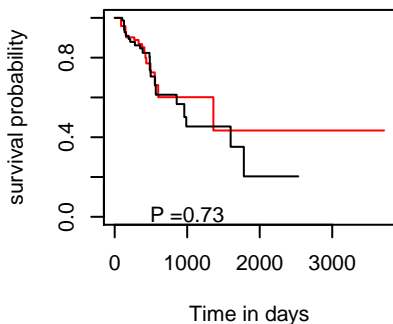**OS hsa-mir-6844**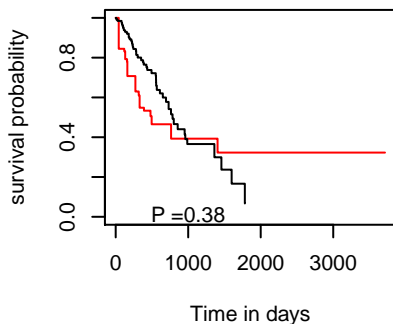**PFI hsa-mir-6844**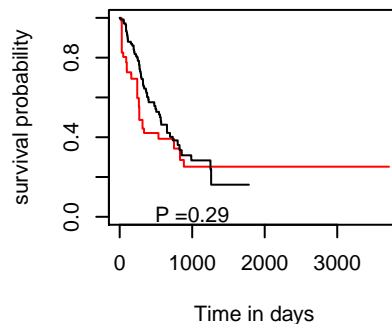**DFI hsa-mir-6844**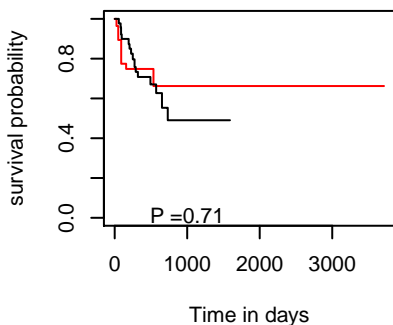**DSS hsa-mir-6844**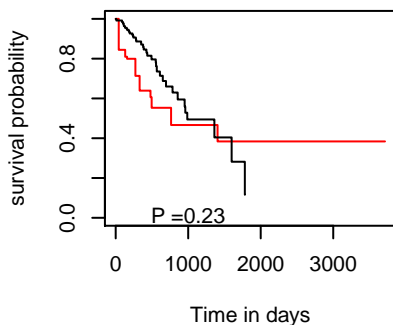**OS hsa-mir-30d**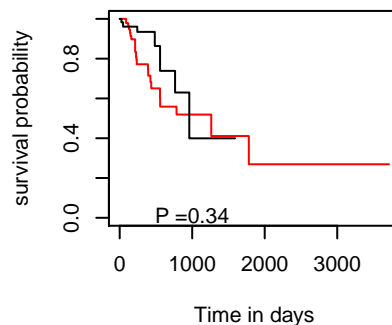

**PFI hsa-mir-30d**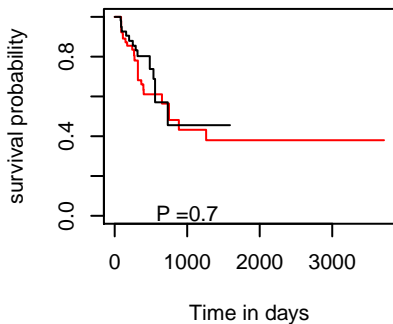**DFI hsa-mir-30d**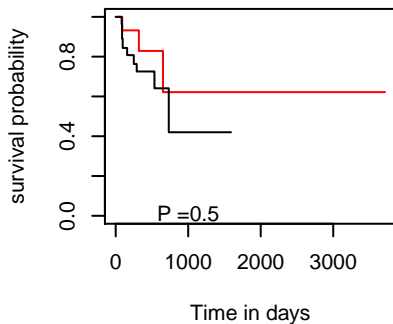**DSS hsa-mir-30d**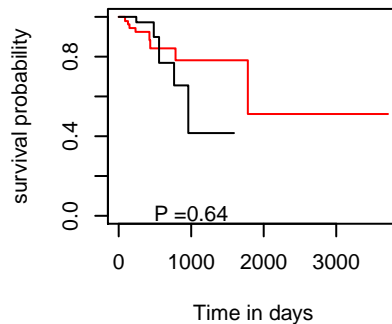**OS hsa-mir-3136**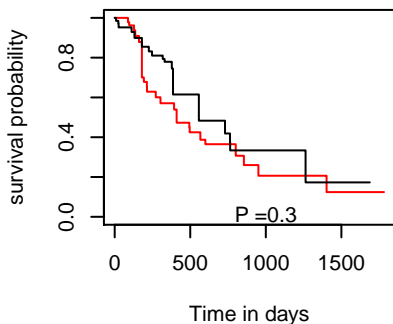**PFI hsa-mir-3136**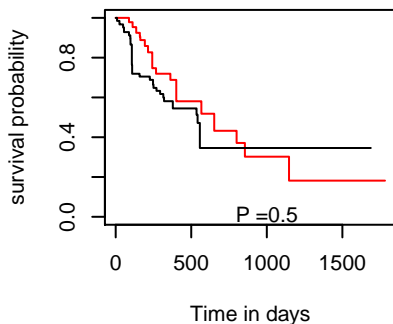**DFI hsa-mir-3136**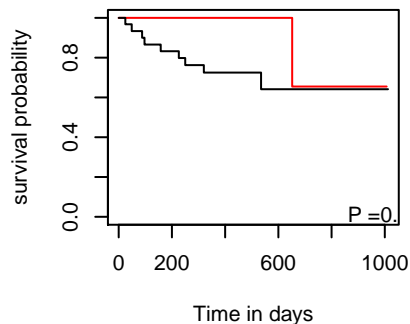**DSS hsa-mir-3136**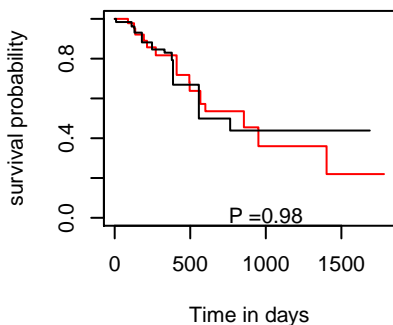**OS hsa-mir-491**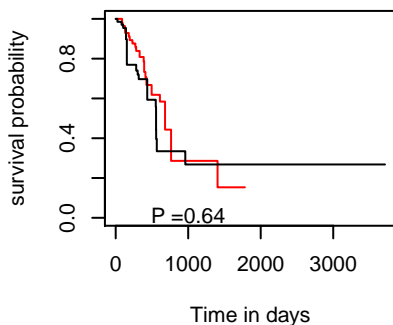**PFI hsa-mir-491**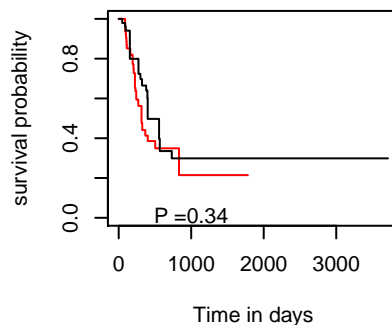

**DFI hsa-mir-491**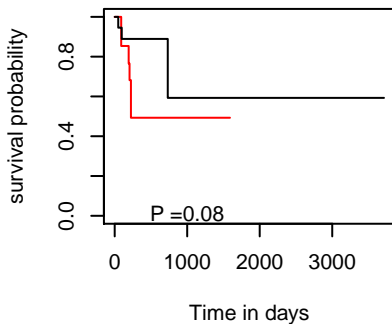**DSS hsa-mir-491**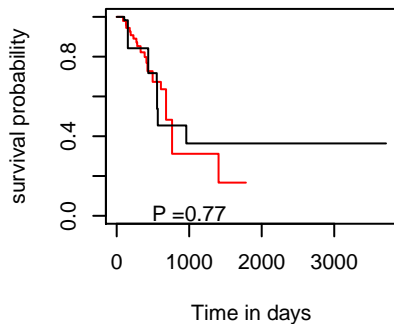**OS hsa-mir-6502**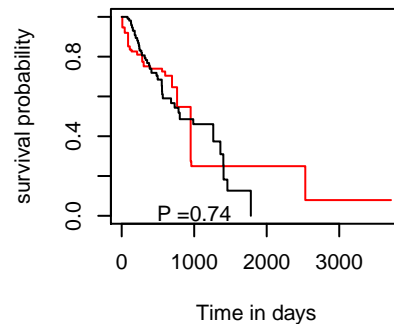**PFI hsa-mir-6502**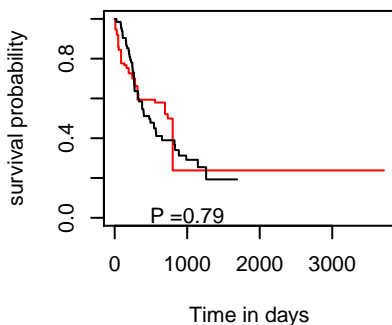**DFI hsa-mir-6502**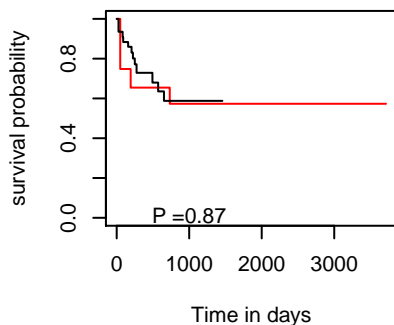**DSS hsa-mir-6502**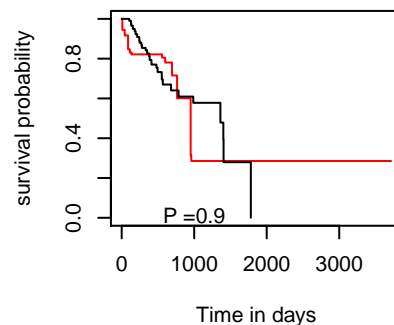**OS hsa-mir-6510**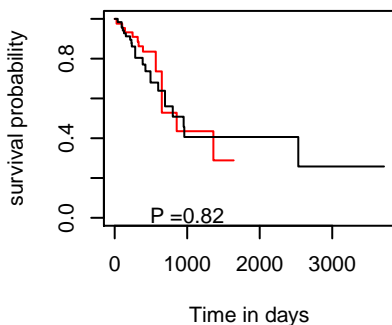**PFI hsa-mir-6510**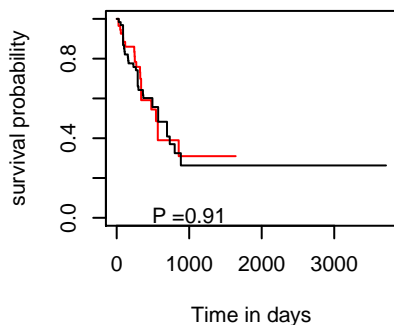**DFI hsa-mir-6510**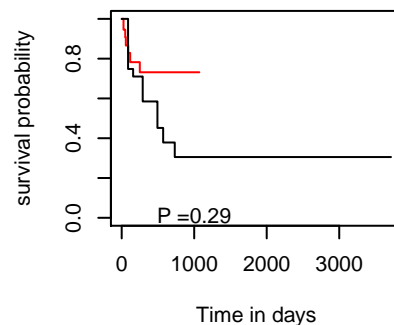

**DSS hsa-mir-6510**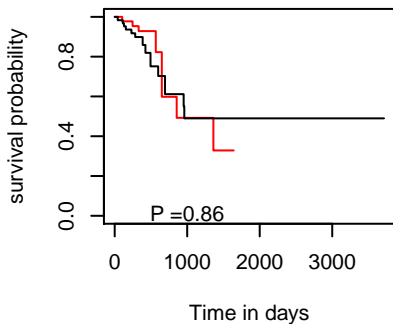**OS hsa-mir-3940**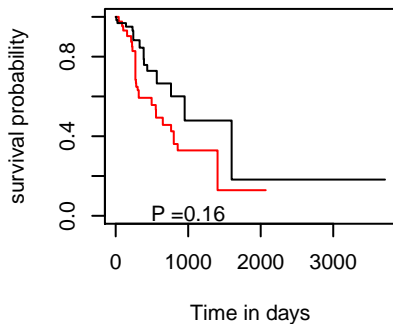**PFI hsa-mir-3940**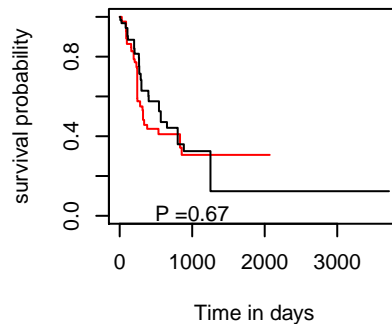**DFI hsa-mir-3940**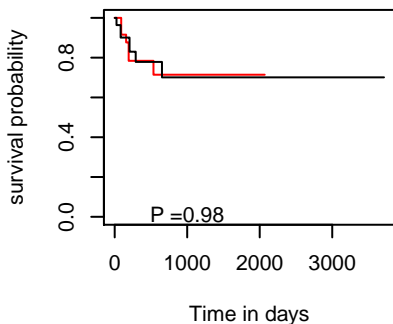**DSS hsa-mir-3940**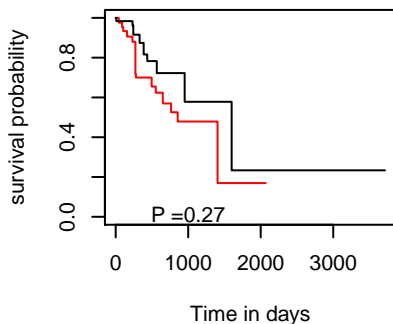**OS hsa-mir-4529**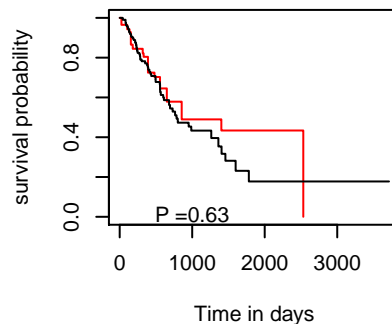**PFI hsa-mir-4529**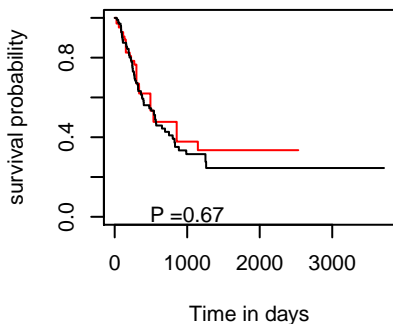**DFI hsa-mir-4529**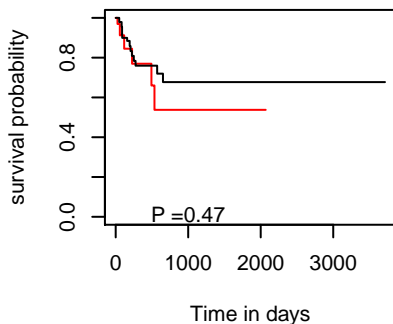**DSS hsa-mir-4529**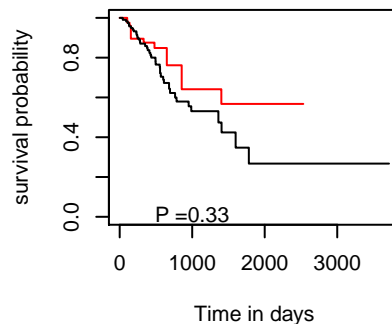

**OS hsa-let-7c**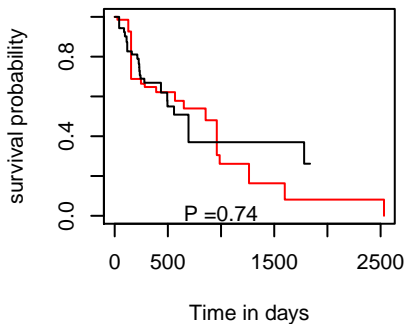**PFI hsa-let-7c**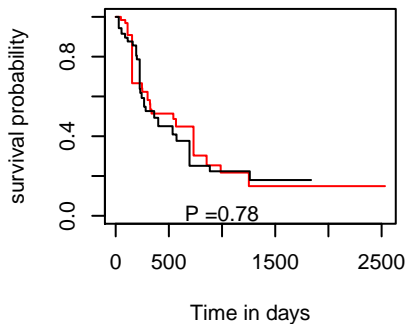**DFI hsa-let-7c**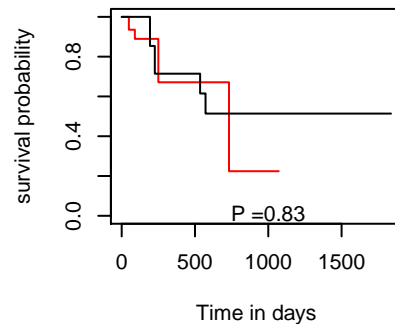**DSS hsa-let-7c**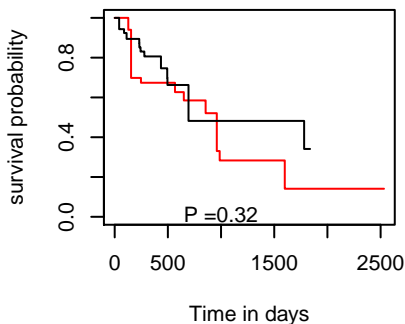**OS hsa-mir-1284**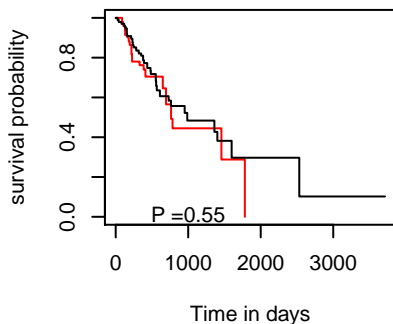**PFI hsa-mir-1284**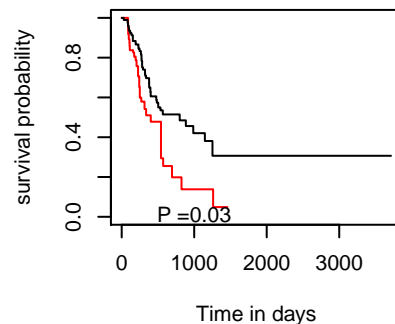**DFI hsa-mir-1284**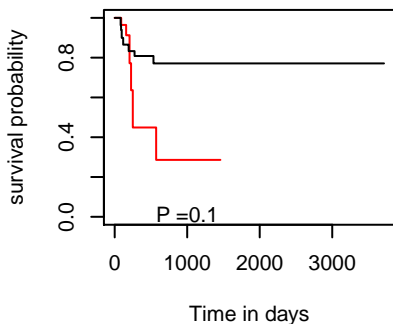**DSS hsa-mir-1284**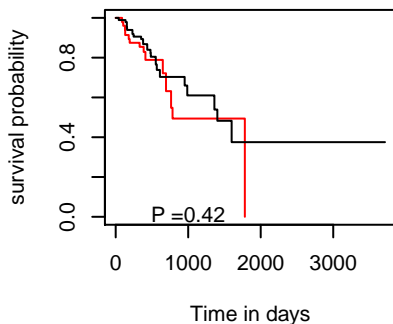**OS hsa-mir-4777**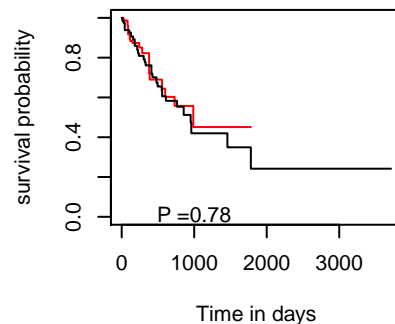

**PFI hsa-mir-4777**

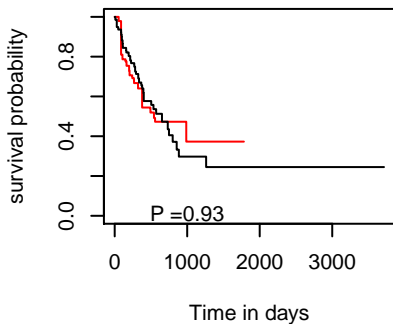

**DFI hsa-mir-4777**

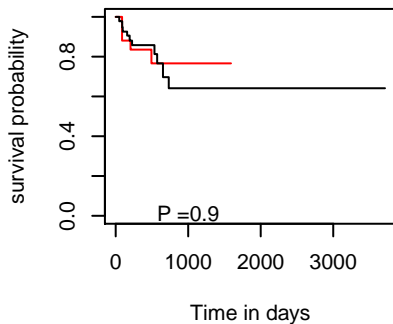

**DSS hsa-mir-4777**

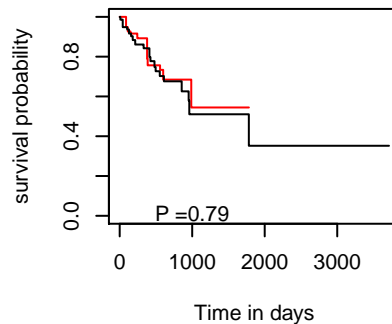

**OS hsa-mir-3691**

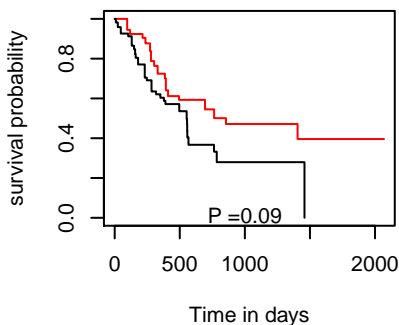

**PFI hsa-mir-3691**

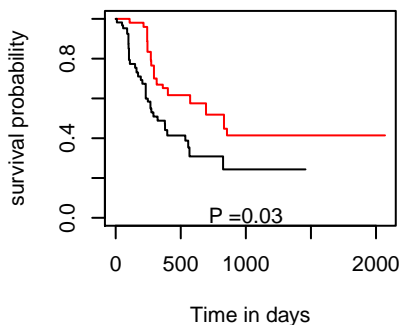

**DFI hsa-mir-3691**

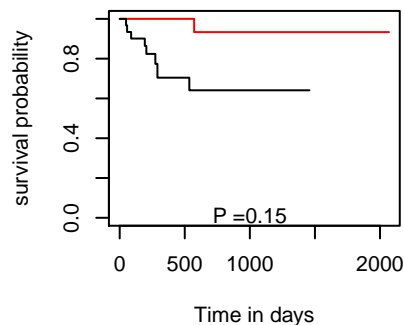

**DSS hsa-mir-3691**

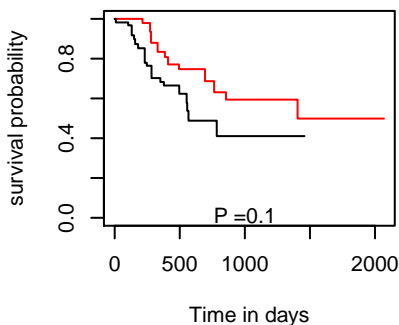

**OS hsa-mir-598**

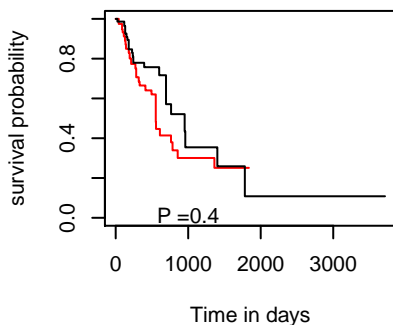

**PFI hsa-mir-598**

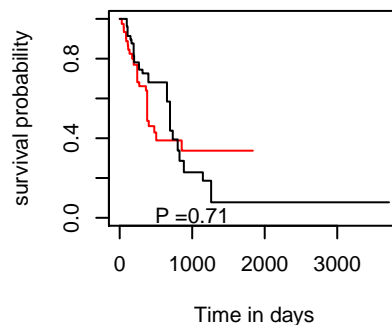

**DFI hsa-mir-598**

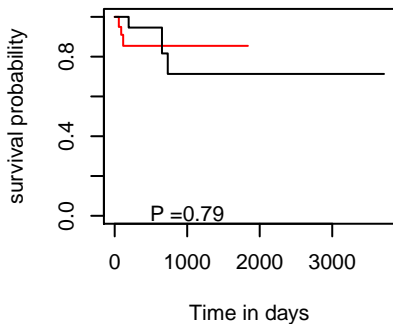

**DSS hsa-mir-598**

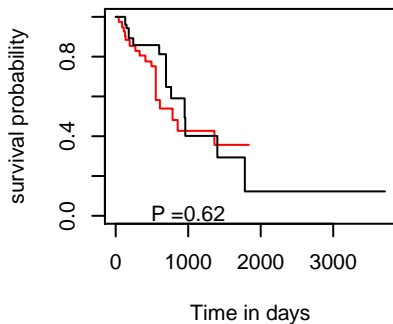

**OS hsa-mir-4662a**

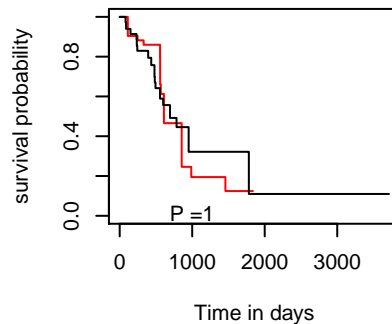

**PFI hsa-mir-4662a**

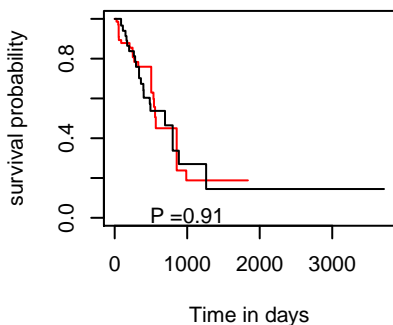

**DFI hsa-mir-4662a**

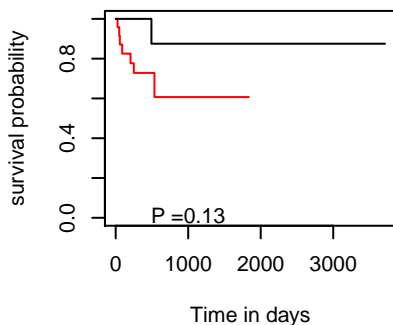

**DSS hsa-mir-4662a**

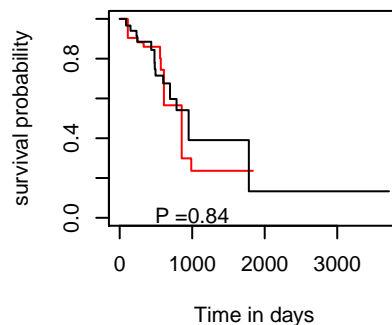

**OS hsa-mir-1305**

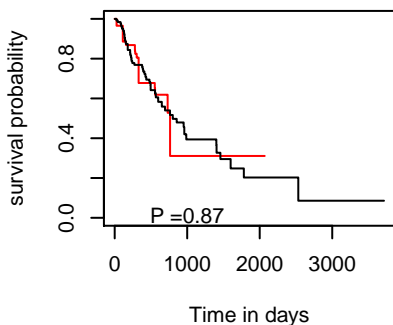

**PFI hsa-mir-1305**

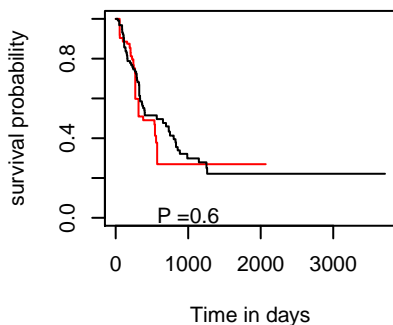

**DFI hsa-mir-1305**

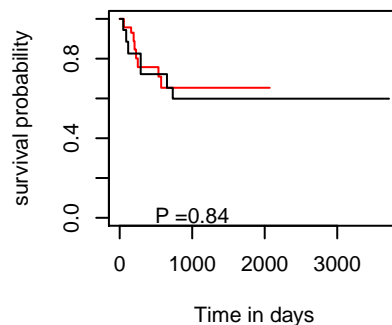

**DSS hsa-mir-1305**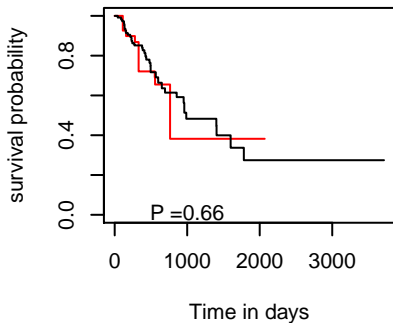**OS hsa-mir-548d-1**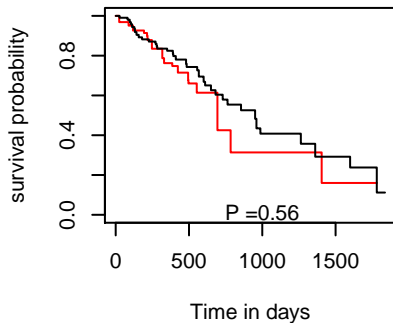**PFI hsa-mir-548d-1**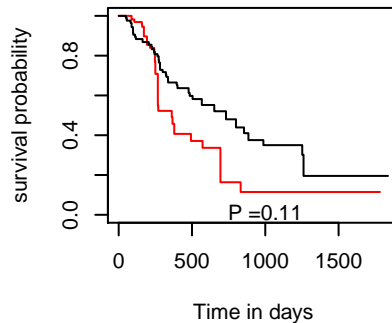**DFI hsa-mir-548d-1**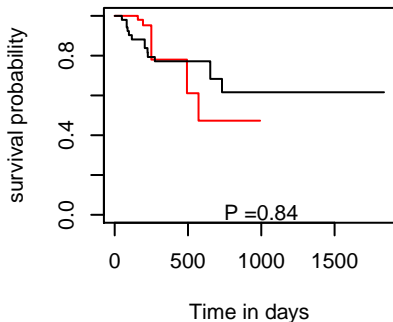**DSS hsa-mir-548d-1**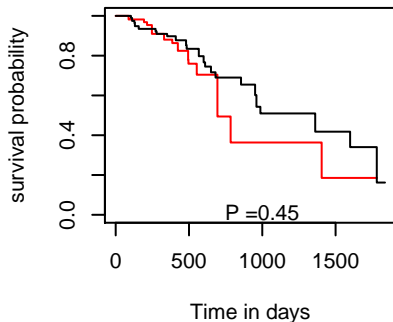**OS hsa-mir-4775**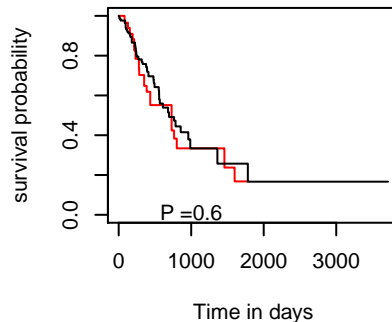**PFI hsa-mir-4775**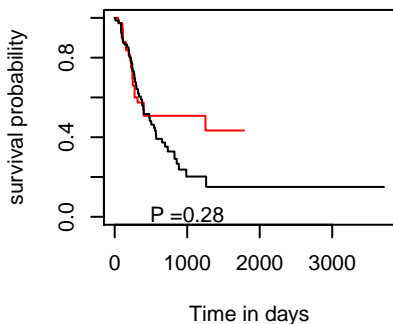**DFI hsa-mir-4775**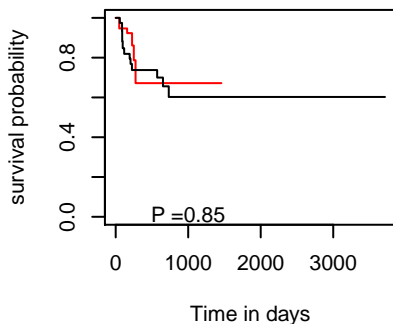**DSS hsa-mir-4775**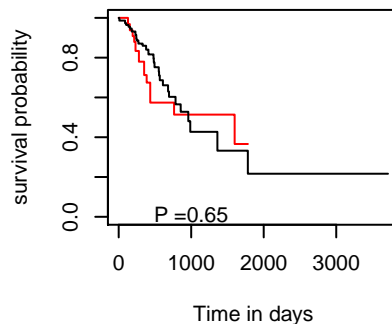

**OS hsa-mir-31**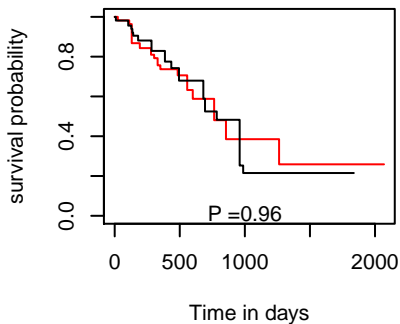**PFI hsa-mir-31**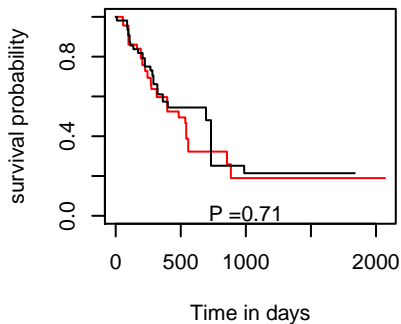**DFI hsa-mir-31**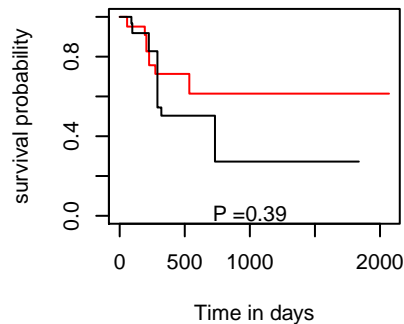**DSS hsa-mir-31**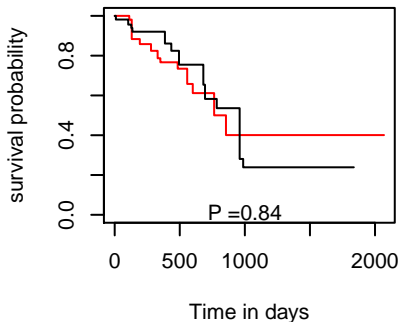**OS hsa-mir-937**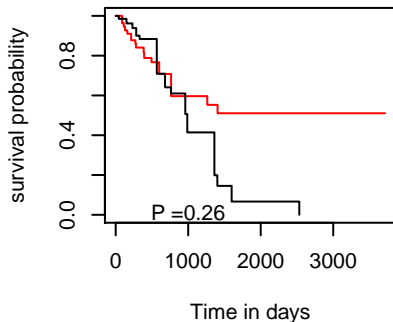**PFI hsa-mir-937**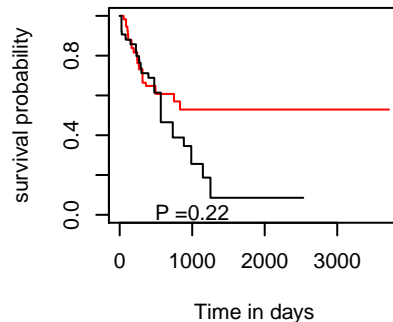**DFI hsa-mir-937**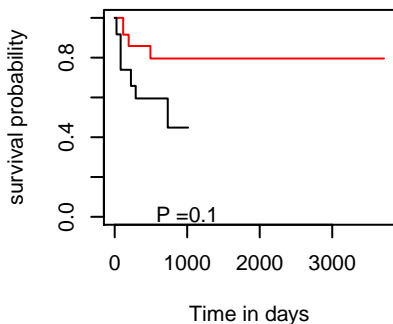**DSS hsa-mir-937**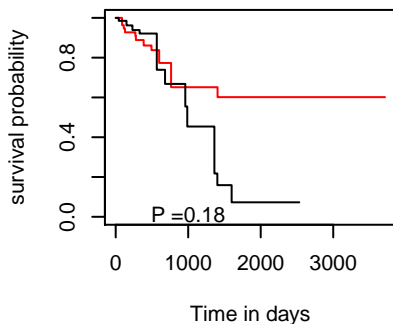**OS hsa-mir-30e**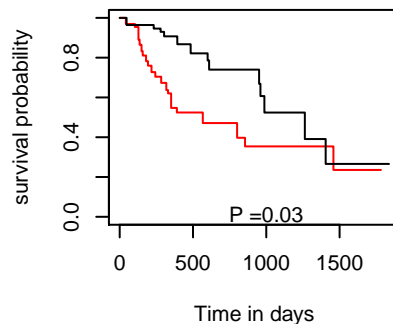

**PFI hsa-mir-30e**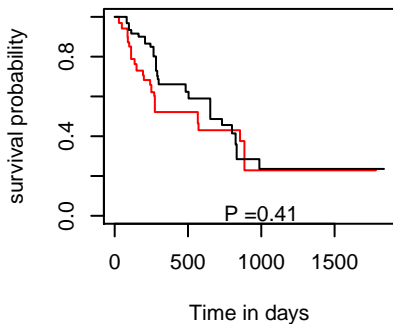**DFI hsa-mir-30e**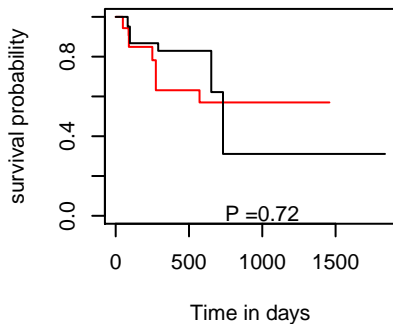**DSS hsa-mir-30e**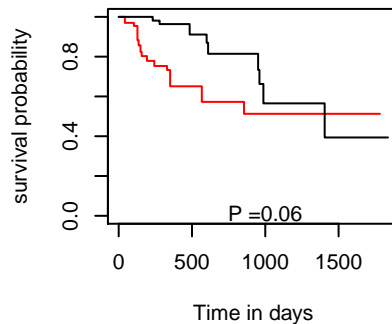**OS hsa-mir-3187**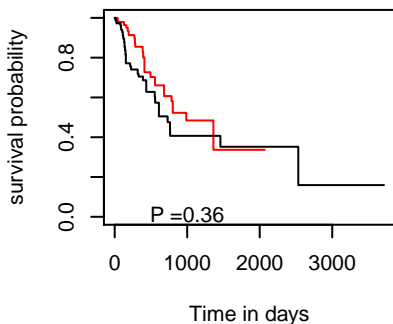**PFI hsa-mir-3187**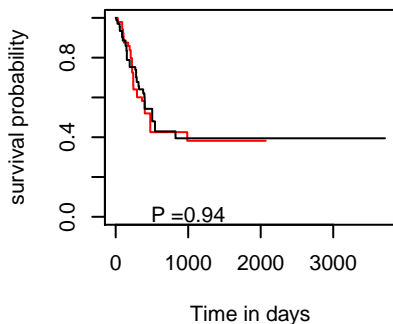**DFI hsa-mir-3187**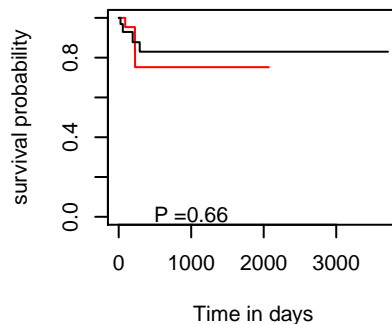**DSS hsa-mir-3187**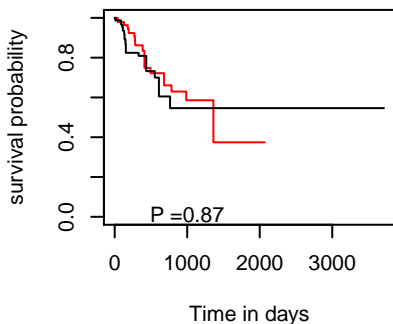**OS hsa-mir-942**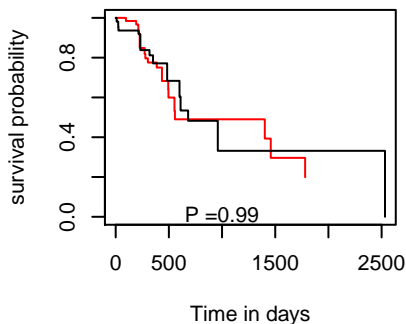**PFI hsa-mir-942**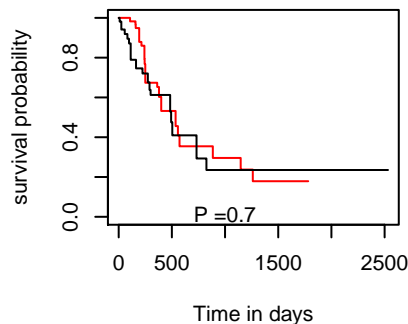

**DFI hsa-mir-942**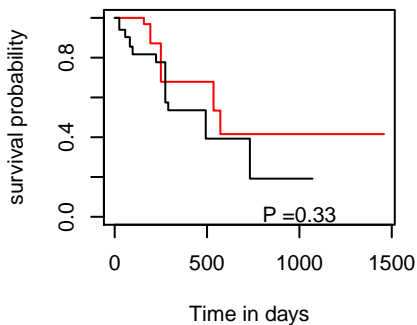**DSS hsa-mir-942**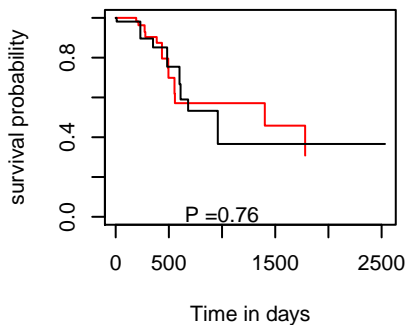**OS hsa-mir-4664**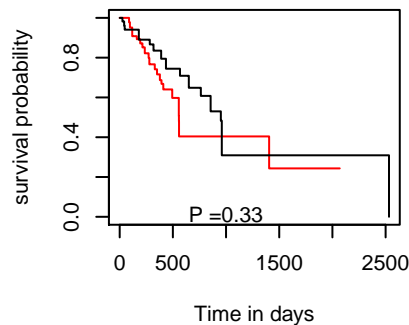**PFI hsa-mir-4664**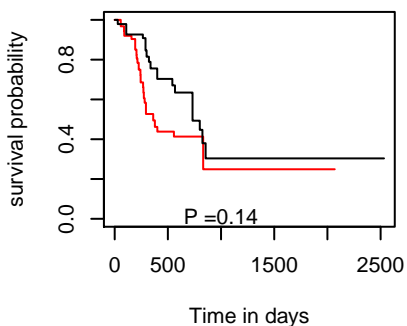**DFI hsa-mir-4664**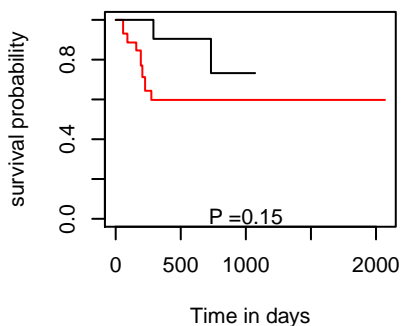**DSS hsa-mir-4664**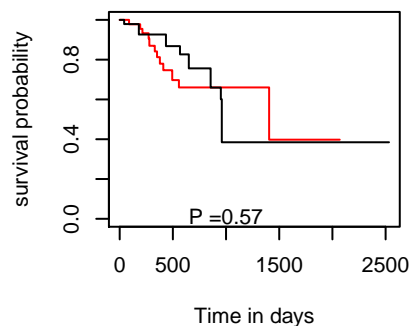**OS hsa-mir-100**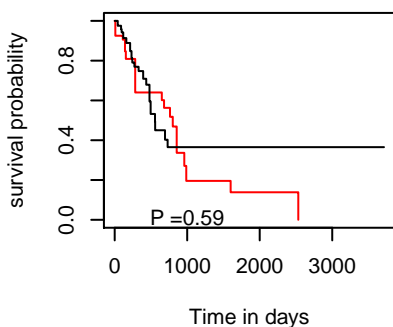**PFI hsa-mir-100**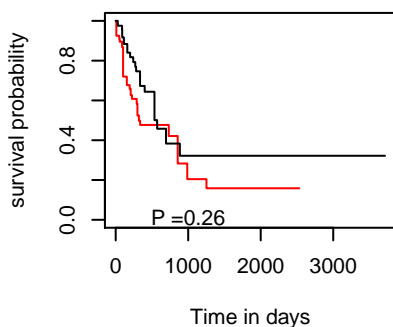**DFI hsa-mir-100**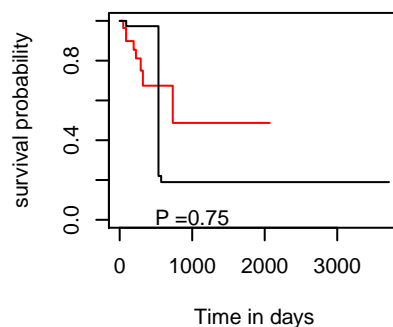

**DSS hsa-mir-100**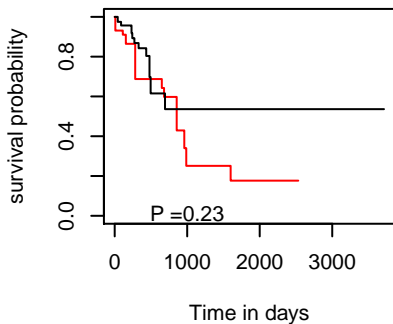**OS hsa-let-7a-2**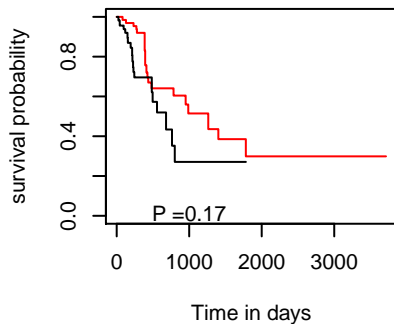**PFI hsa-let-7a-2**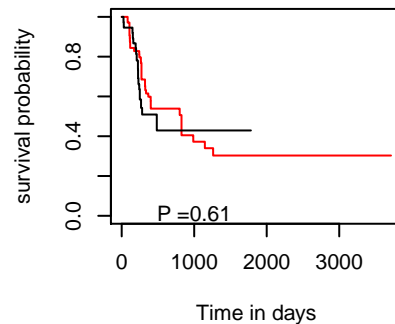**DFI hsa-let-7a-2**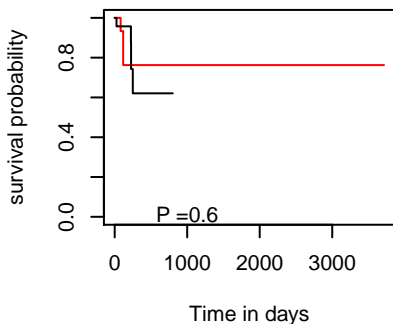**DSS hsa-let-7a-2**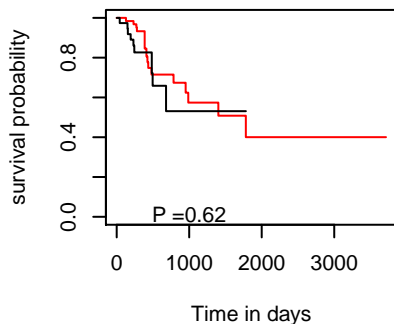**OS hsa-mir-486**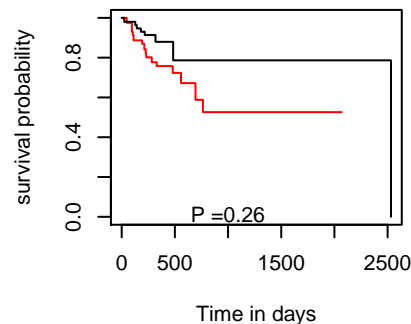**PFI hsa-mir-486**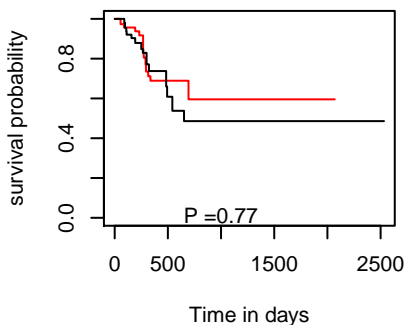**DFI hsa-mir-486**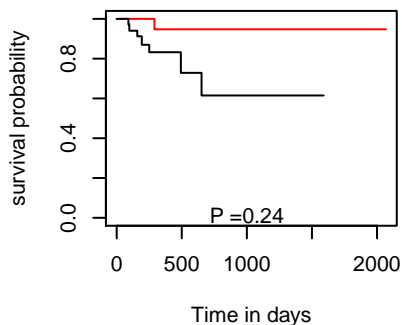**DSS hsa-mir-486**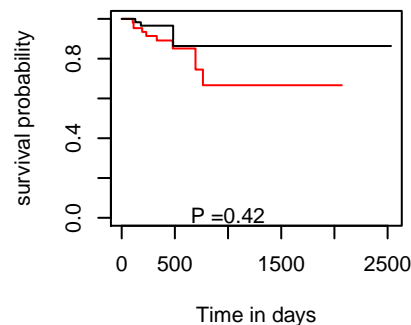

**OS hsa-mir-653**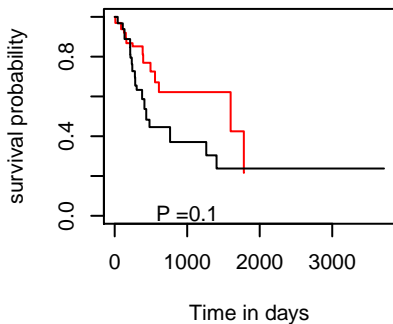**PFI hsa-mir-653**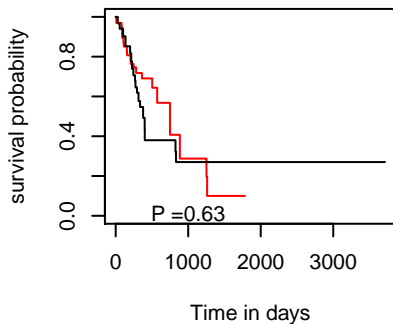**DFI hsa-mir-653**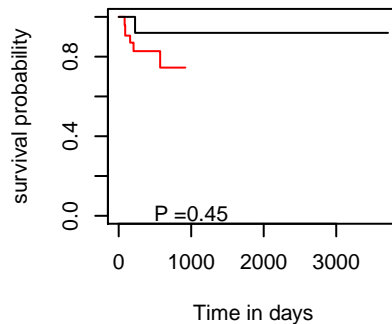**DSS hsa-mir-653**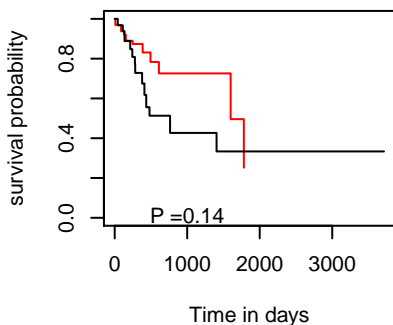**OS hsa-mir-93**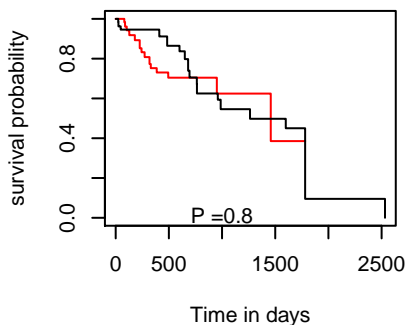**PFI hsa-mir-93**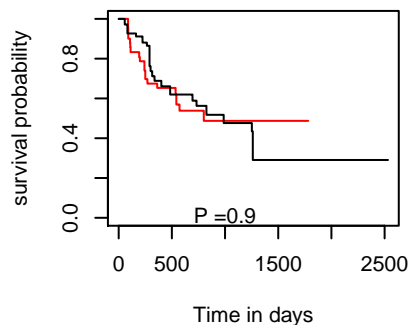**DFI hsa-mir-93**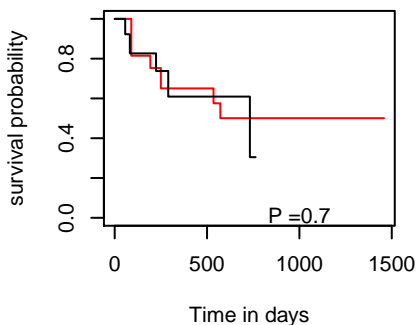**DSS hsa-mir-93**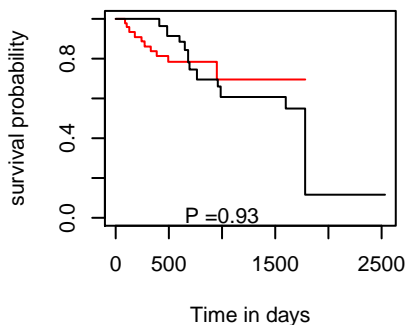**OS hsa-mir-149**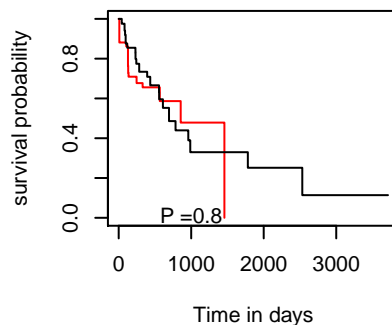

**PFI hsa-mir-149**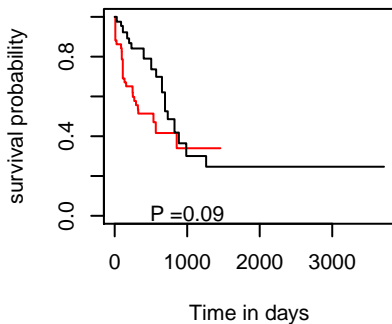**DFI hsa-mir-149**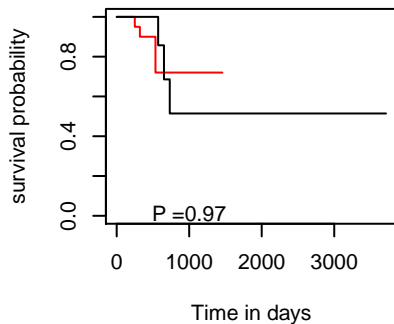**DSS hsa-mir-149**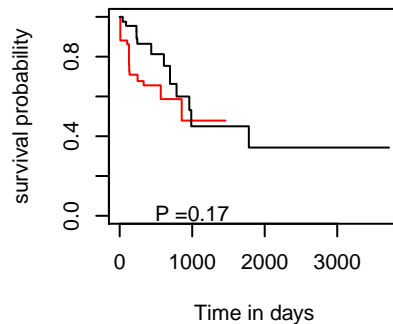**OS hsa-mir-4444-2**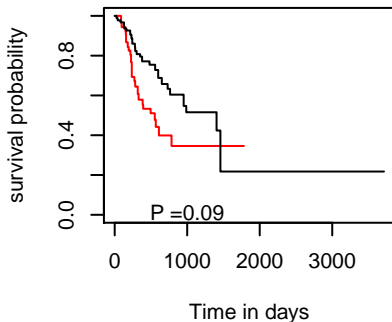**PFI hsa-mir-4444-2**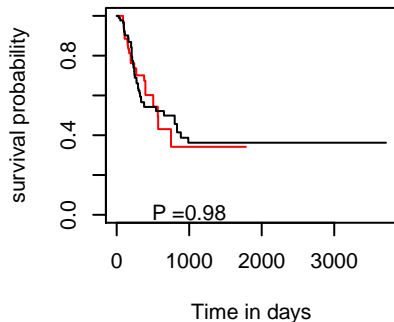**DFI hsa-mir-4444-2**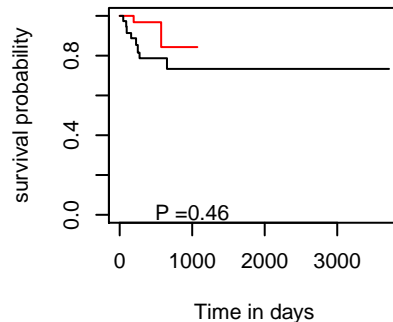**DSS hsa-mir-4444-2**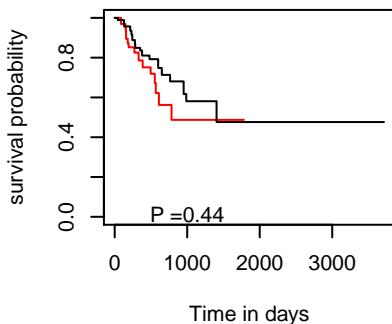**OS hsa-mir-25**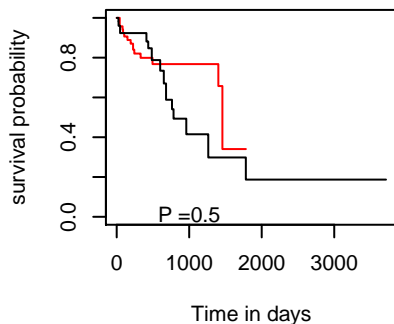**PFI hsa-mir-25**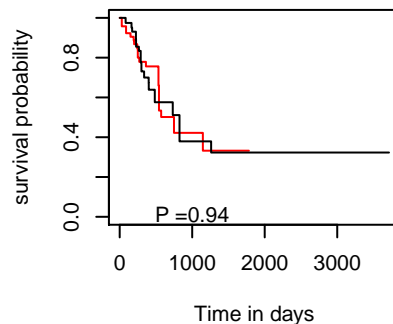



**DSS hsa-mir-4999**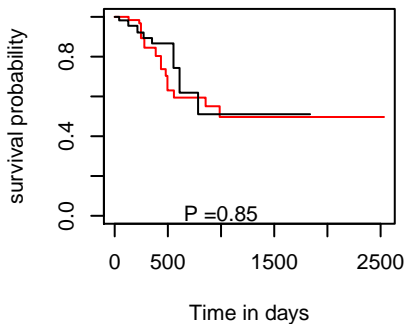**OS hsa-mir-153-1**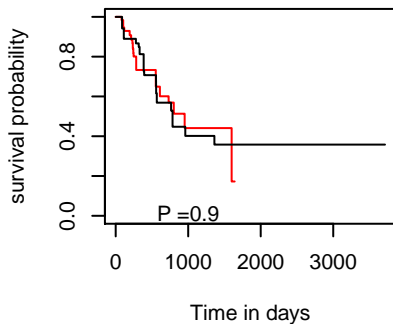**PFI hsa-mir-153-1**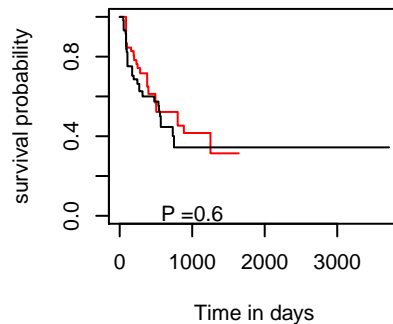**DFI hsa-mir-153-1**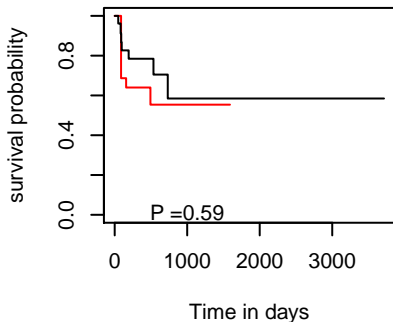**DSS hsa-mir-153-1**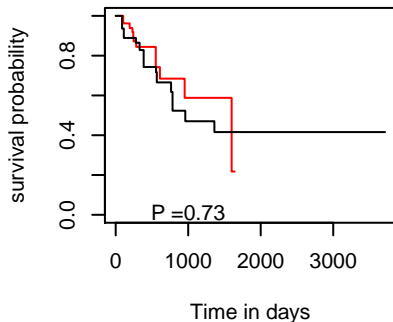**OS hsa-mir-106b**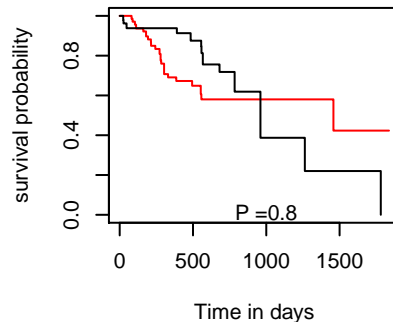**PFI hsa-mir-106b**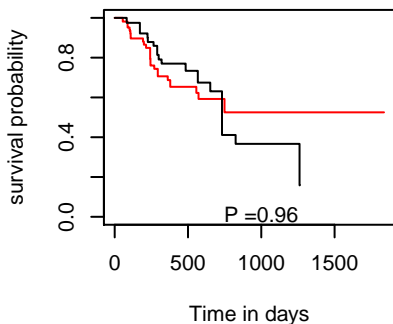**DFI hsa-mir-106b**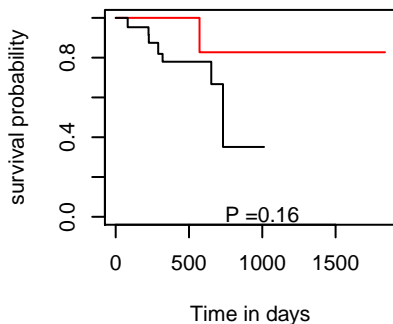**DSS hsa-mir-106b**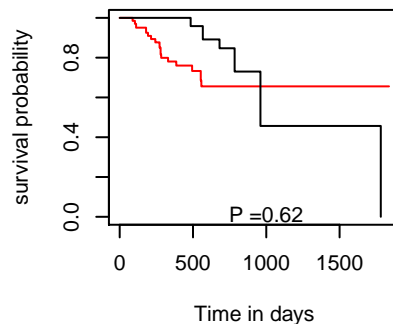

**OS hsa-mir-3130-1**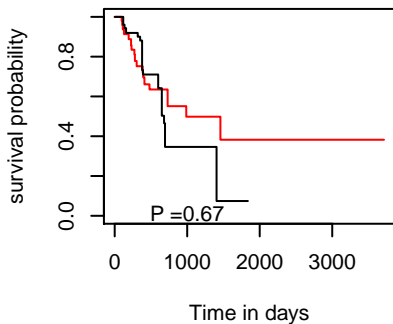**PFI hsa-mir-3130-1**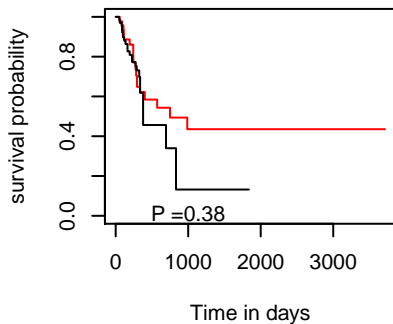**DFI hsa-mir-3130-1**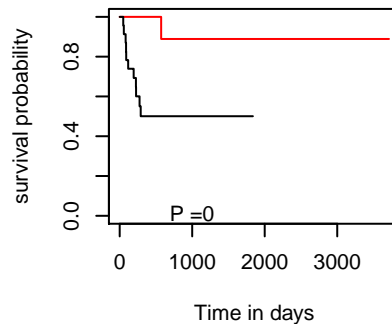**DSS hsa-mir-3130-1**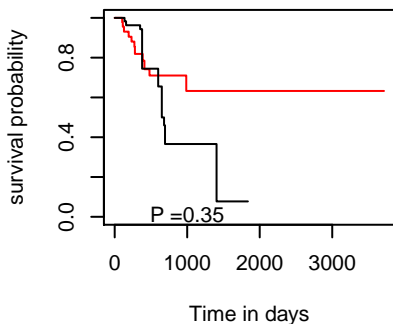**OS hsa-mir-489**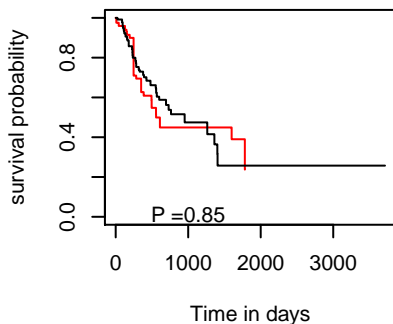**PFI hsa-mir-489**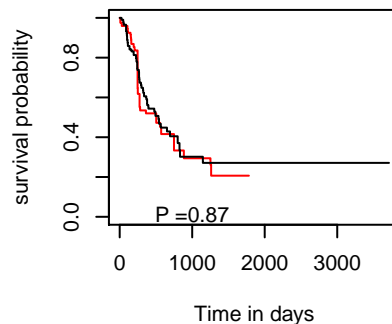**DFI hsa-mir-489**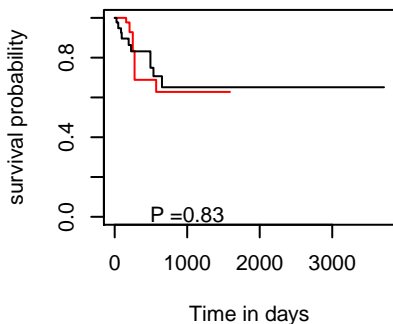**DSS hsa-mir-489**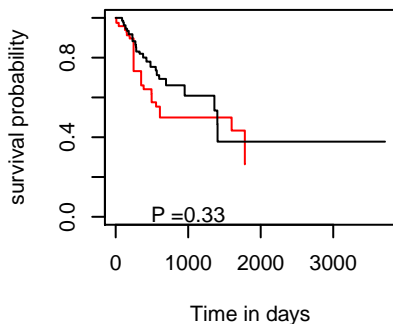**OS hsa-mir-548o**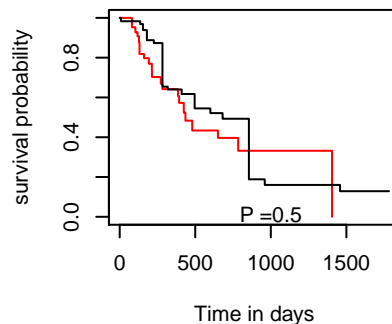

**PFI hsa-mir-548o**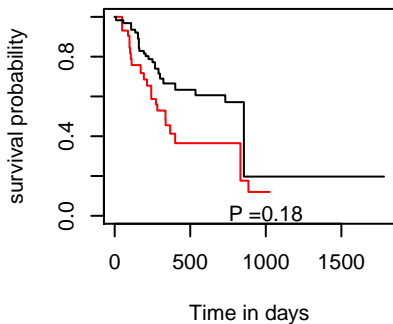**DFI hsa-mir-548o**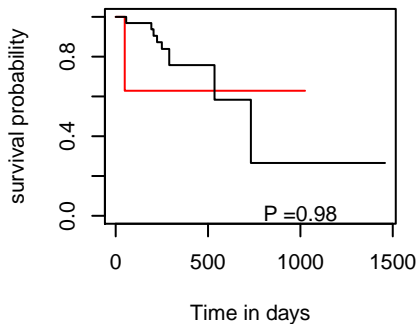**DSS hsa-mir-548o**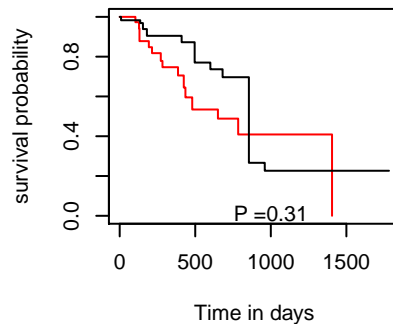**OS hsa-mir-4473**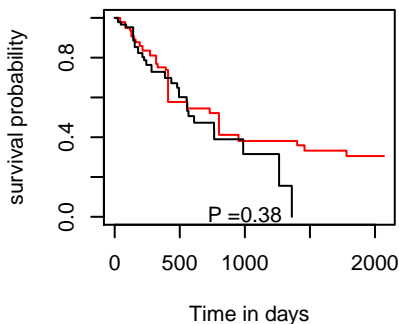**PFI hsa-mir-4473**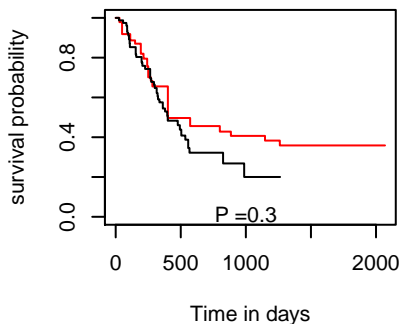**DFI hsa-mir-4473**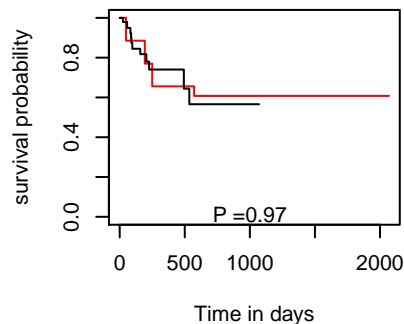**DSS hsa-mir-4473**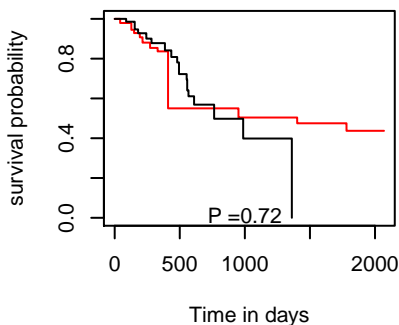**OS hsa-mir-34b**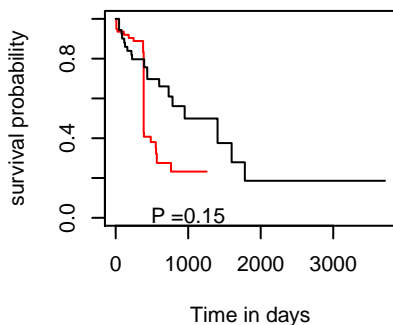**PFI hsa-mir-34b**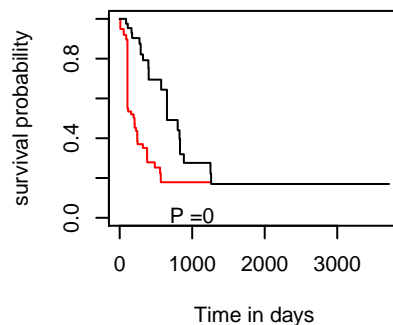



**DSS hsa-mir-6716**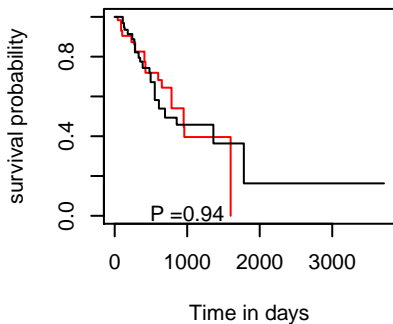**OS hsa-mir-378f**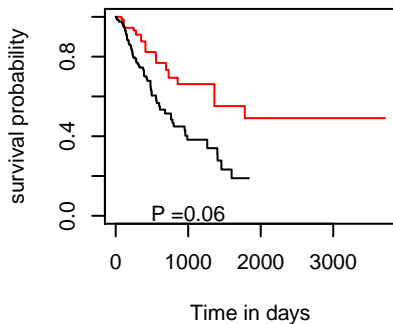**PFI hsa-mir-378f**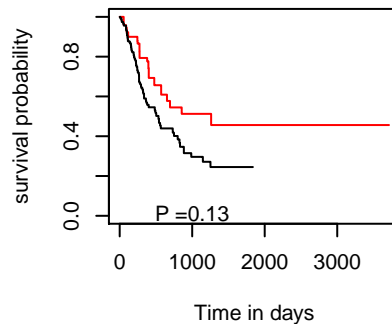**DFI hsa-mir-378f**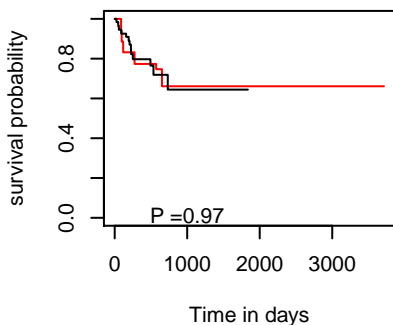**DSS hsa-mir-378f**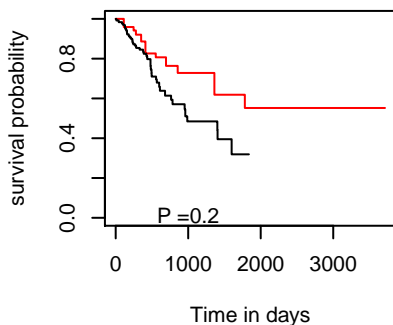**OS hsa-mir-4491**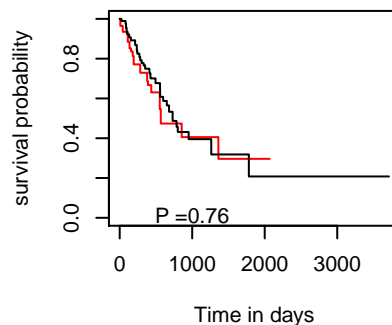**PFI hsa-mir-4491**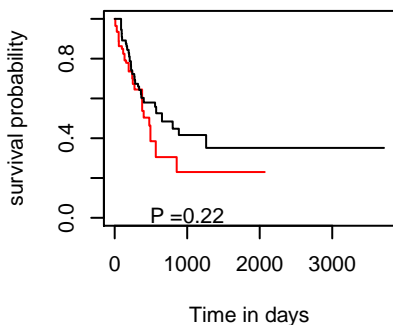**DFI hsa-mir-4491**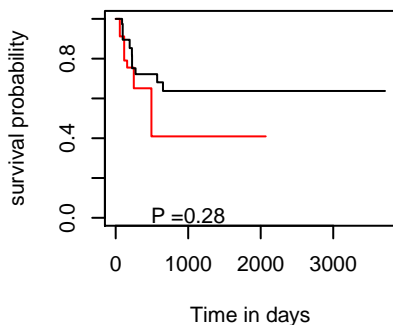**DSS hsa-mir-4491**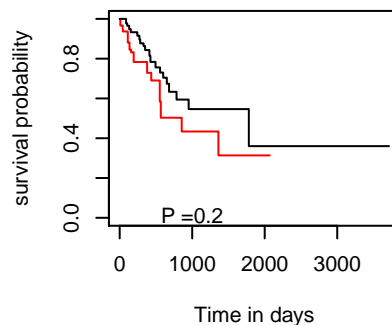

**OS hsa-mir-5010**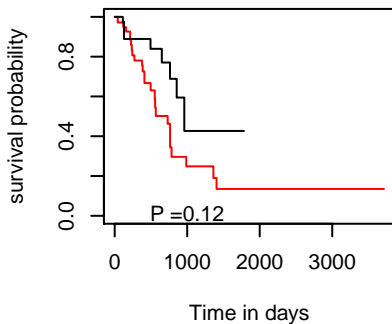**PFI hsa-mir-5010**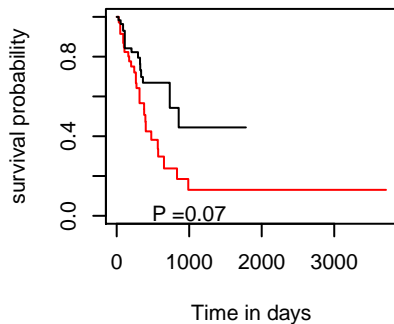**DFI hsa-mir-5010**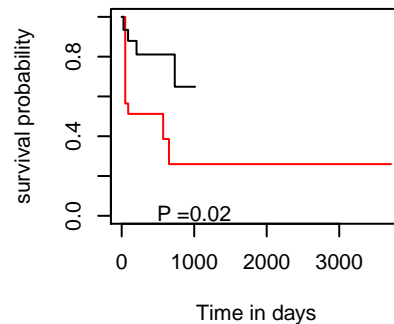**DSS hsa-mir-5010**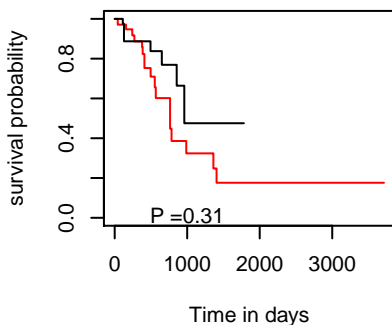**OS hsa-mir-151a**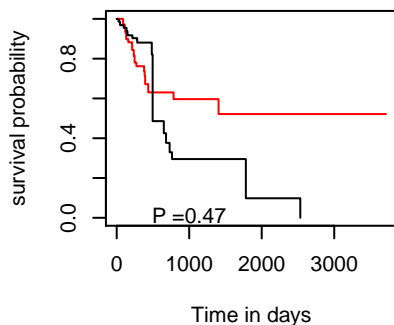**PFI hsa-mir-151a**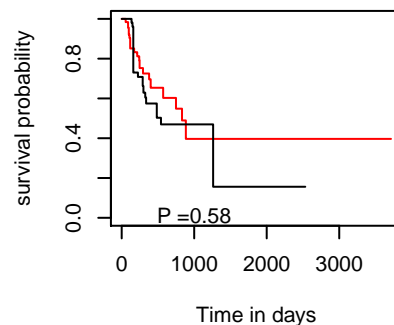**DFI hsa-mir-151a**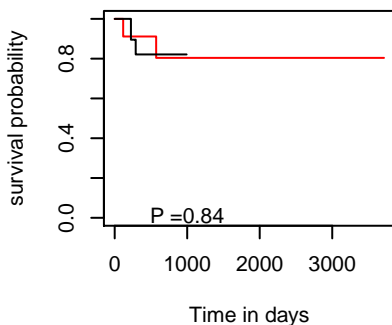**DSS hsa-mir-151a**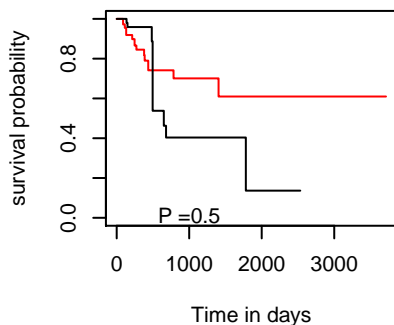

Supplement: MOESM15 [file 41598_2022_7628_MOESM15_ESM.pdf]
