# Supplementary material for: New Thinking on Read-Aloud.
Source: Springer Nature journal article supplement (doi:10.1038/s41598-022-07628-z), 2001-01-01

# Computing microRNA-gene interaction networks in pan-cancer using miRDriver

Banabithi Bose, Matthew Moravec, and Serdar Bozdag

# Supplemental Figure S7

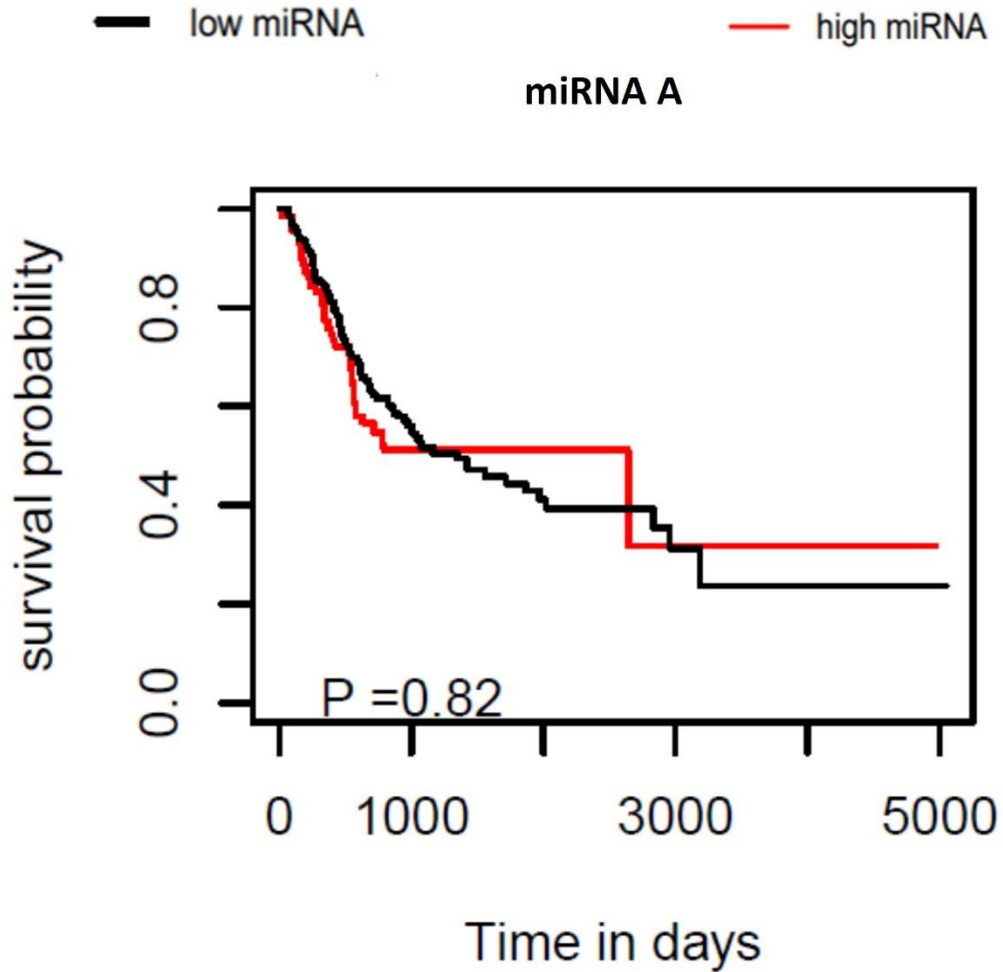

The *Adjusted Kaplan-Meier* survival plots for the computed miRNAs in high and low miRNA expression patient groups.

## Supplemental Figure S7

## Cancer Type: HNSC

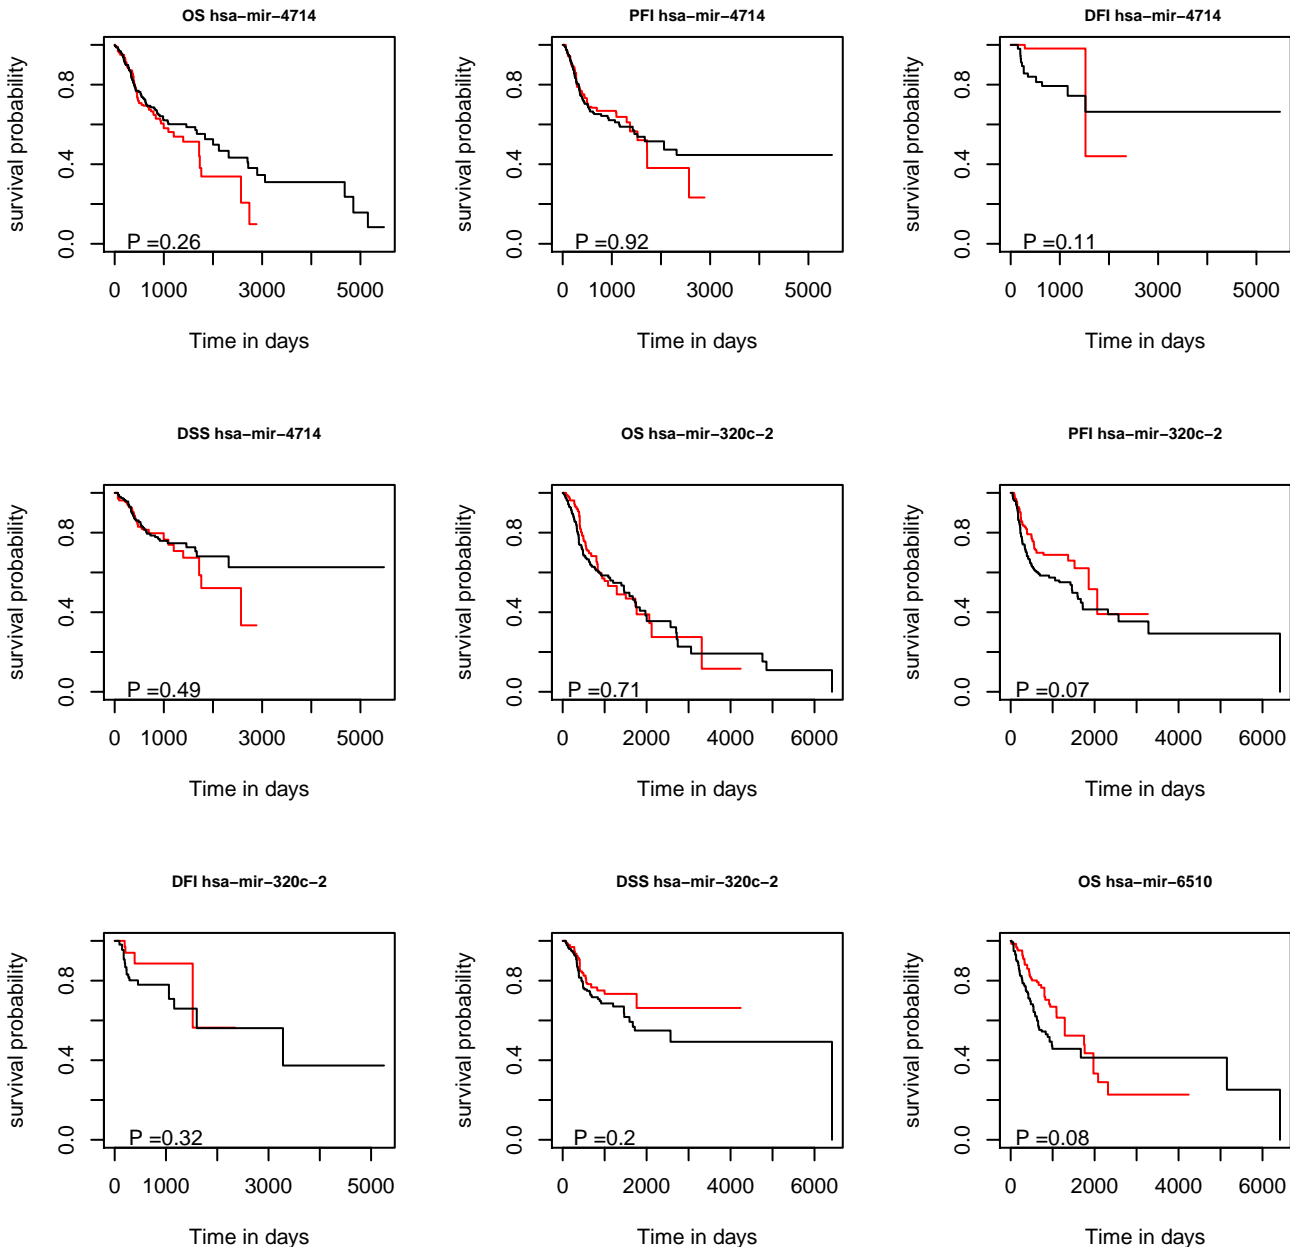

**PFI hsa-mir-6510**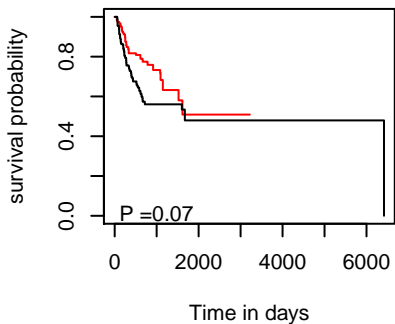**DFI hsa-mir-6510**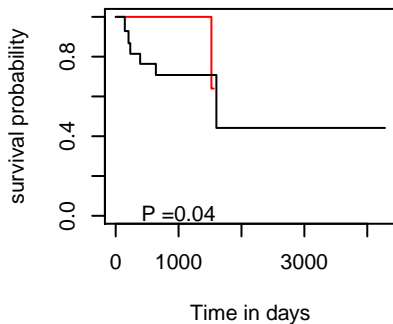**DSS hsa-mir-6510**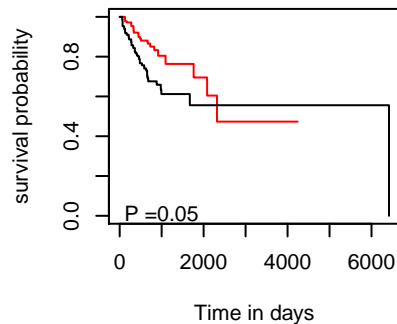**OS hsa-mir-561**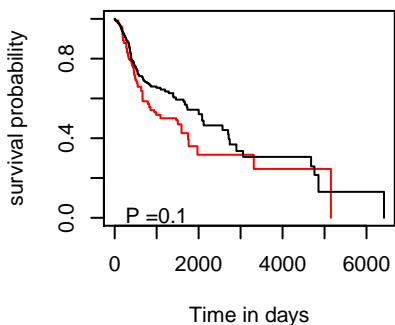**PFI hsa-mir-561**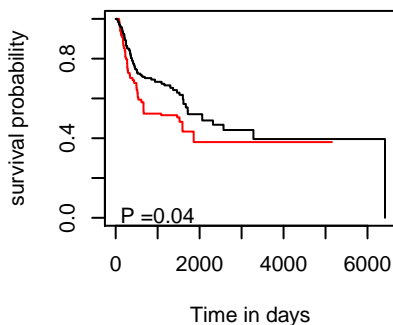**DFI hsa-mir-561**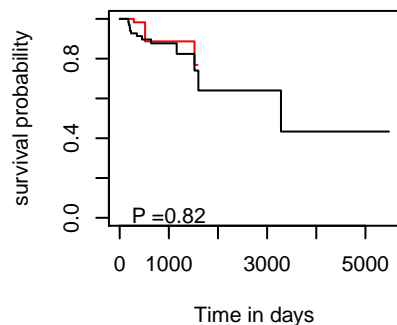**DSS hsa-mir-561**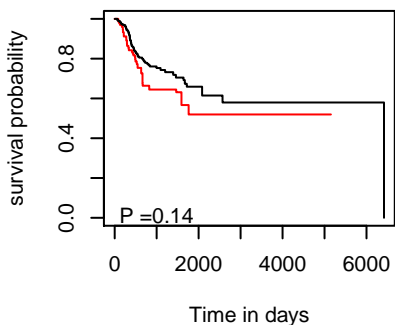**OS hsa-mir-3127**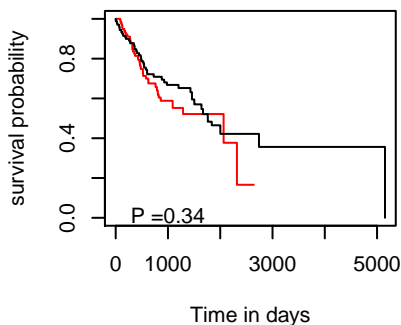**PFI hsa-mir-3127**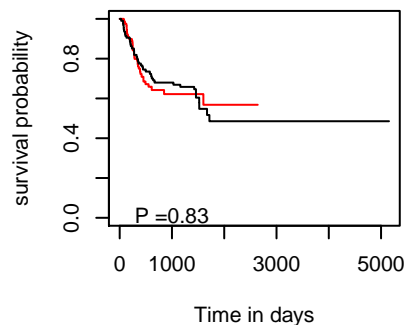

**DFI hsa-mir-3127**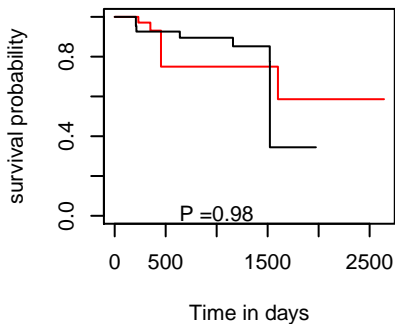**DSS hsa-mir-3127**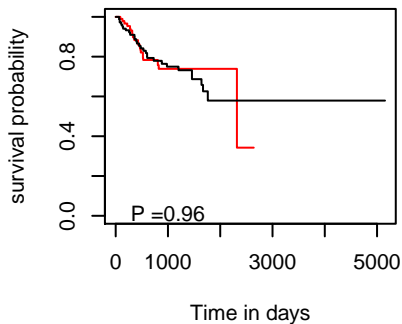**OS hsa-mir-342**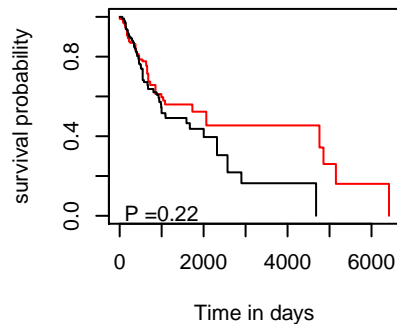**PFI hsa-mir-342**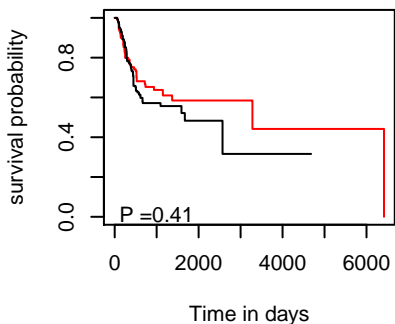**DFI hsa-mir-342**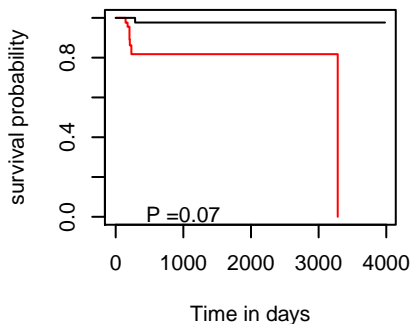**DSS hsa-mir-342**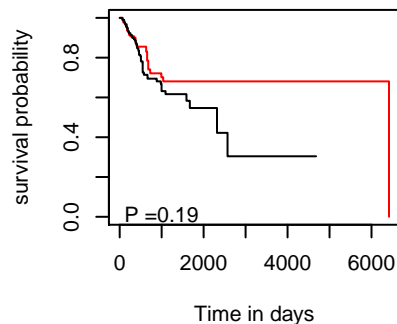**OS hsa-mir-6720**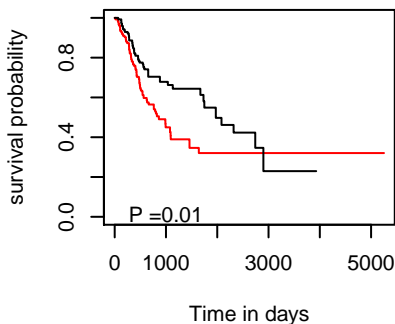**PFI hsa-mir-6720**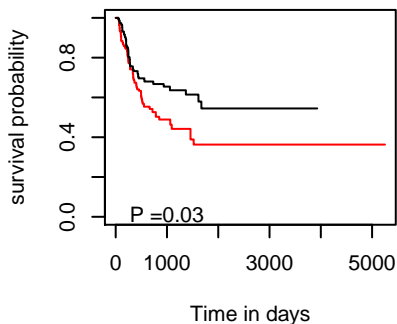**DFI hsa-mir-6720**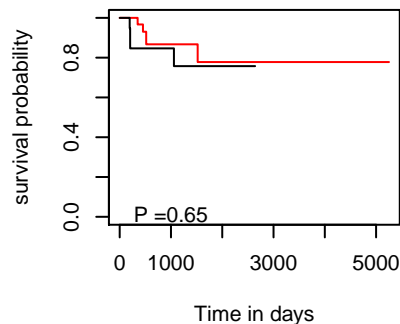

**DSS hsa-mir-6720**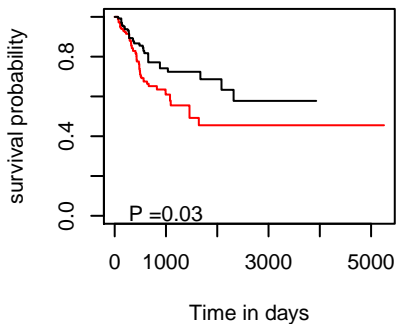**OS hsa-mir-1227**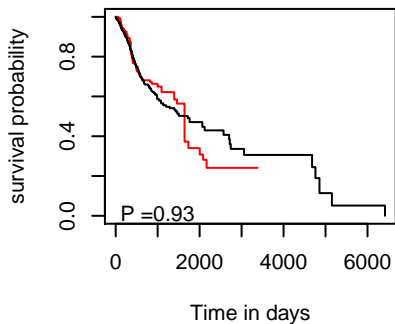**PFI hsa-mir-1227**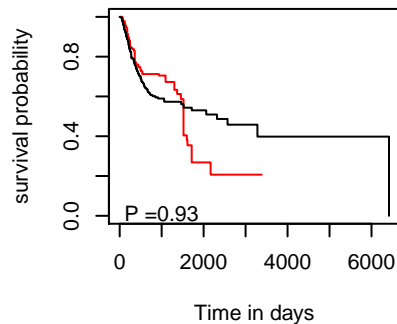**DFI hsa-mir-1227**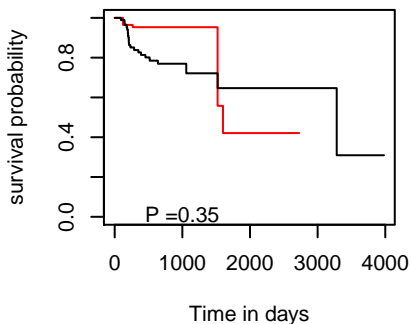**DSS hsa-mir-1227**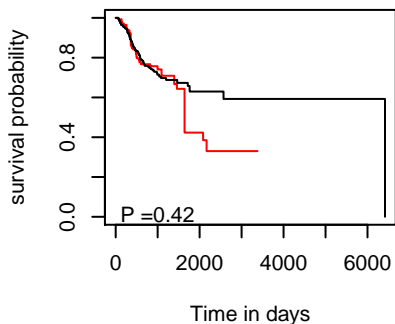**OS hsa-mir-339**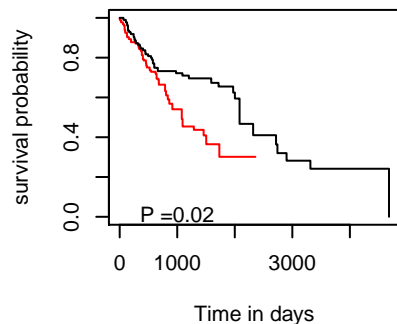**PFI hsa-mir-339**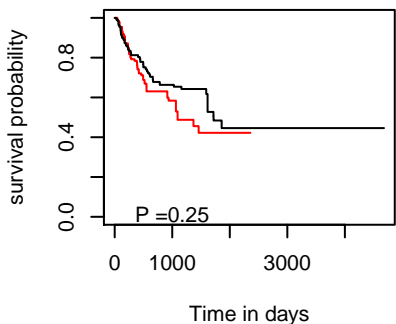**DFI hsa-mir-339**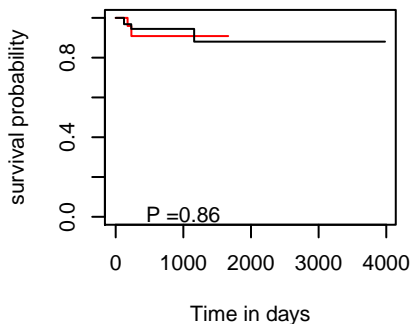**DSS hsa-mir-339**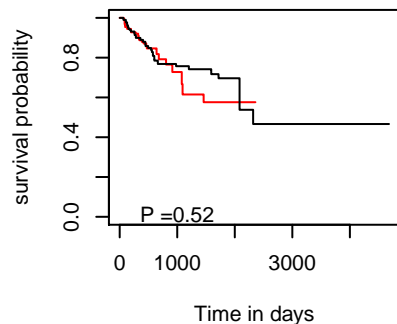

**OS hsa-mir-346**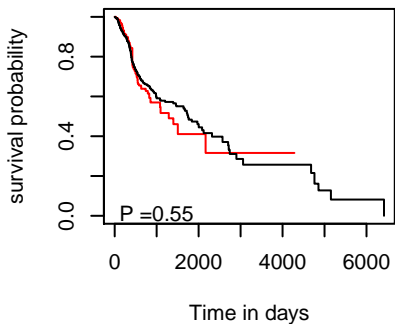**PFI hsa-mir-346**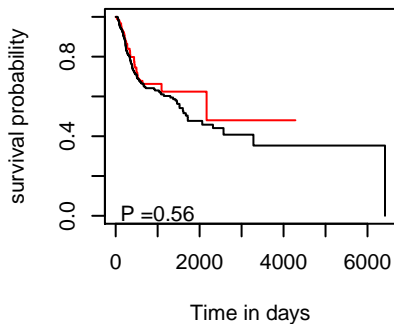**DFI hsa-mir-346**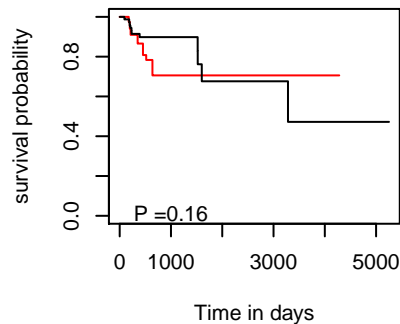**DSS hsa-mir-346**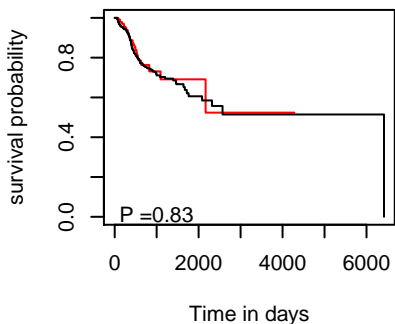**OS hsa-mir-4745**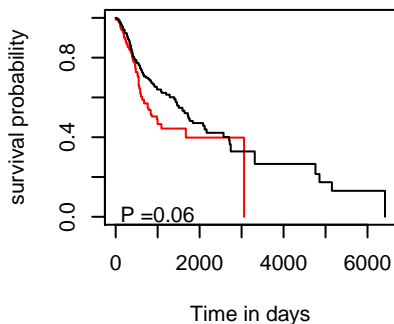**PFI hsa-mir-4745**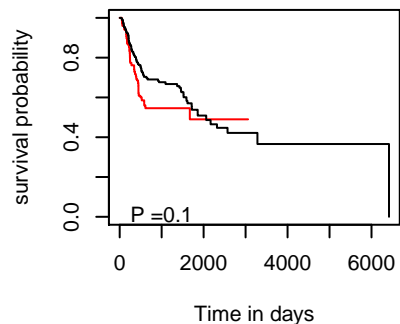**DFI hsa-mir-4745**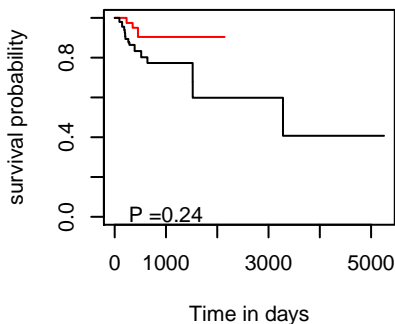**DSS hsa-mir-4745**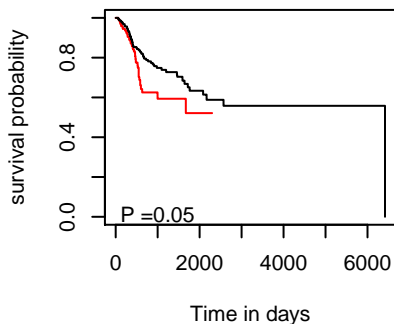**OS hsa-mir-4775**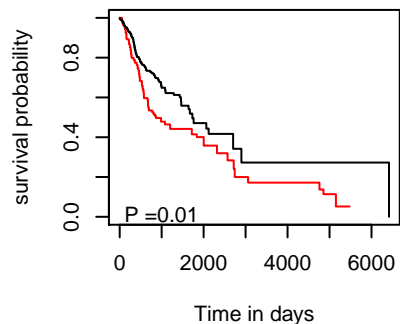

**PFI hsa-mir-4775**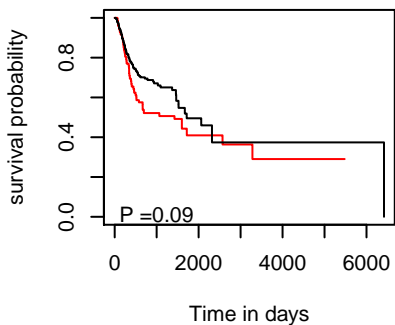**DFI hsa-mir-4775**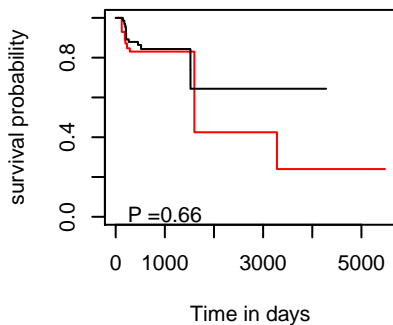**DSS hsa-mir-4775**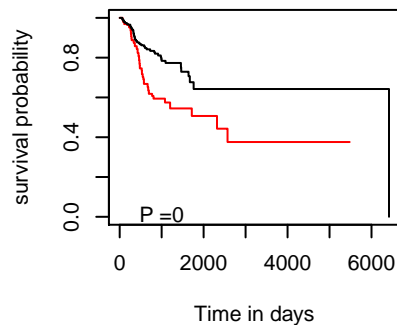**OS hsa-mir-548d-1**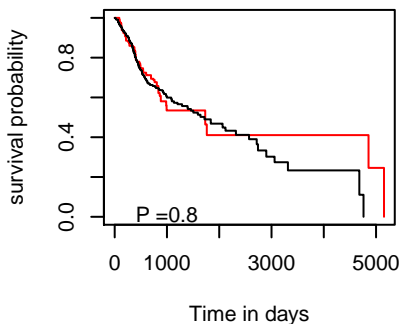**PFI hsa-mir-548d-1**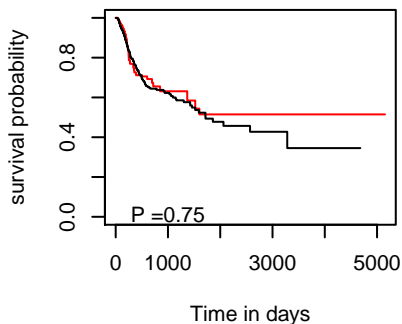**DFI hsa-mir-548d-1**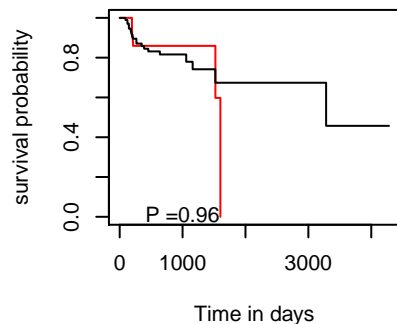**DSS hsa-mir-548d-1**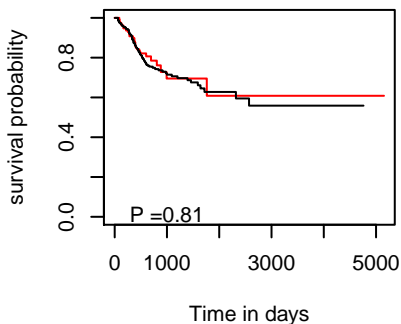**OS hsa-mir-6718**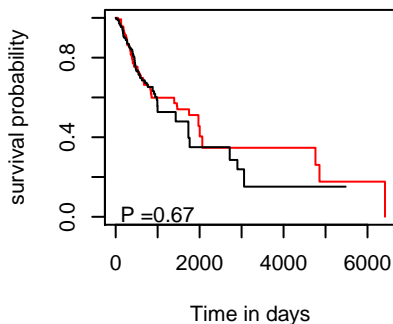**PFI hsa-mir-6718**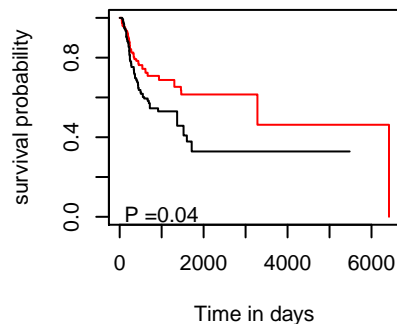

**DFI hsa-mir-6718**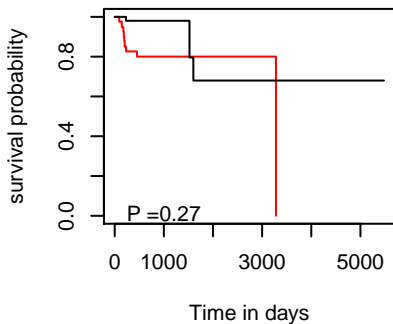**DSS hsa-mir-6718**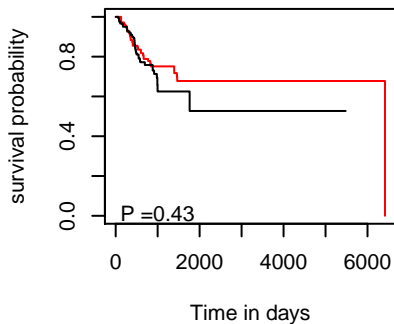**OS hsa-mir-6844**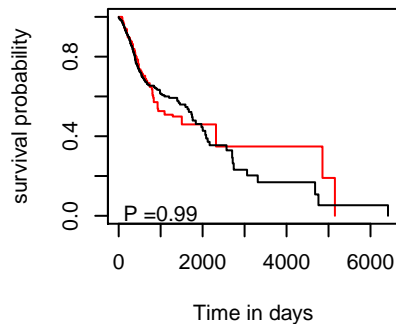**PFI hsa-mir-6844**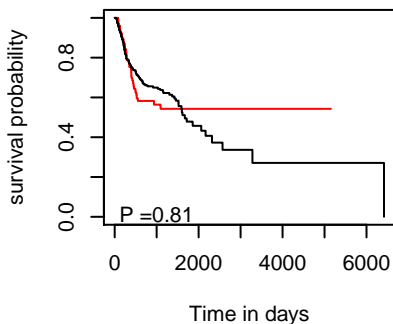**DFI hsa-mir-6844**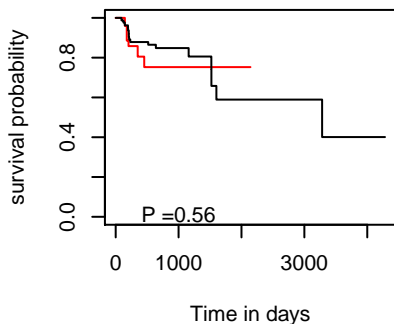**DSS hsa-mir-6844**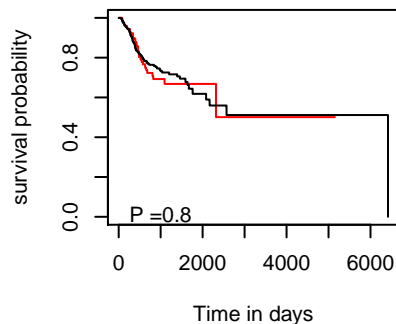**OS hsa-mir-4473**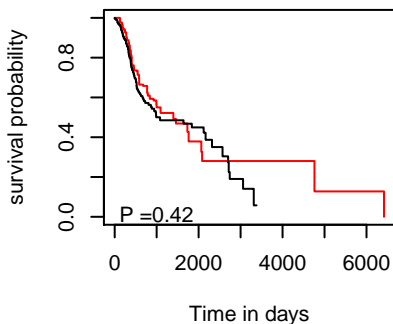**PFI hsa-mir-4473**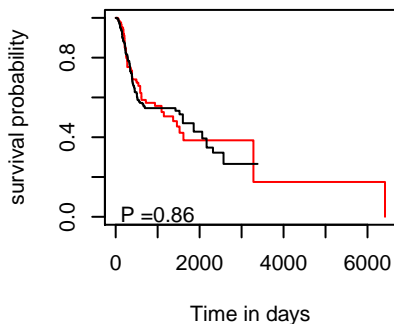**DFI hsa-mir-4473**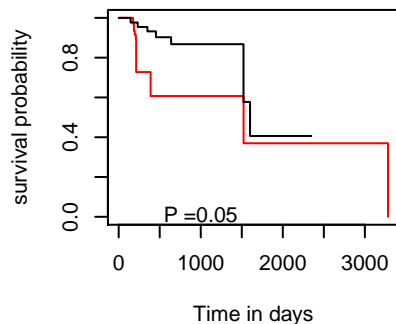

**DSS hsa-mir-4473**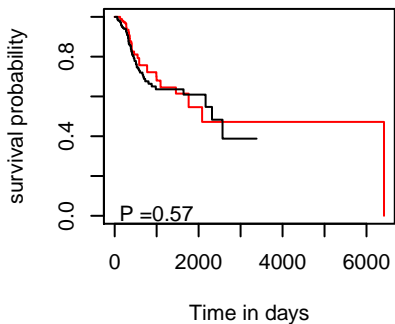**OS hsa-mir-203b**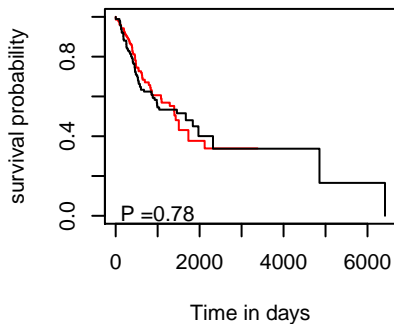**PFI hsa-mir-203b**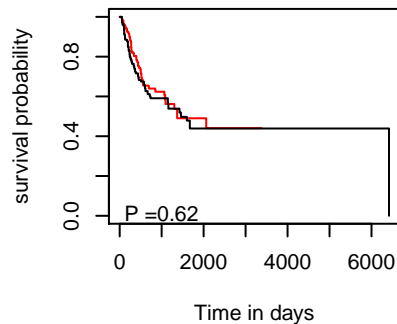**DFI hsa-mir-203b**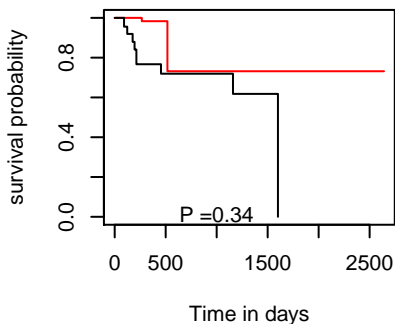**DSS hsa-mir-203b**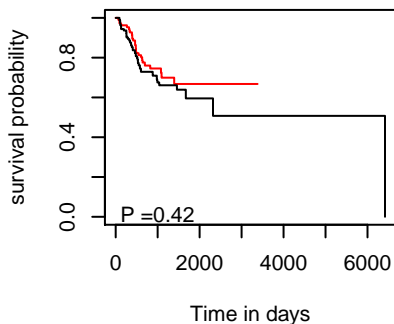**OS hsa-mir-486**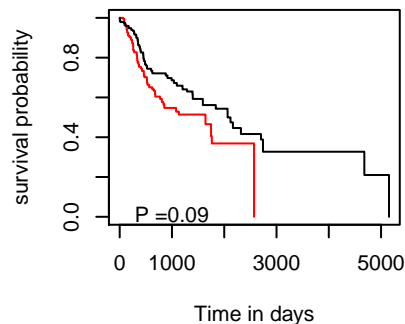**PFI hsa-mir-486**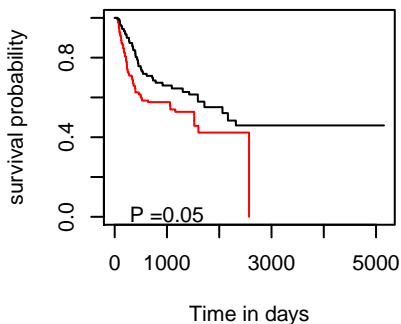**DFI hsa-mir-486**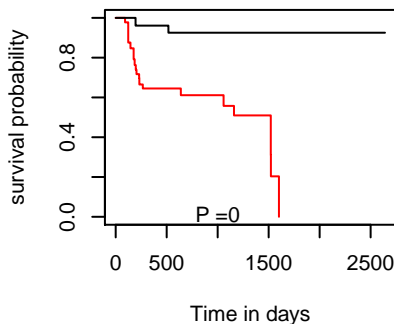**DSS hsa-mir-486**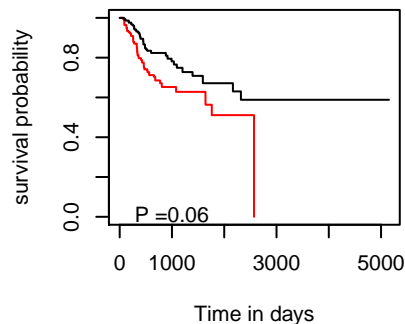

**OS hsa-mir-6870**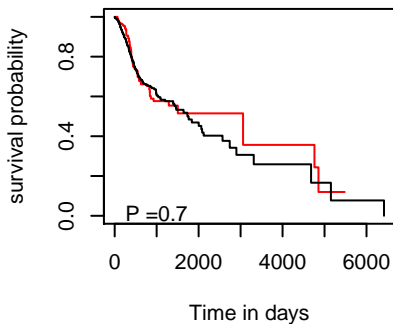**PFI hsa-mir-6870**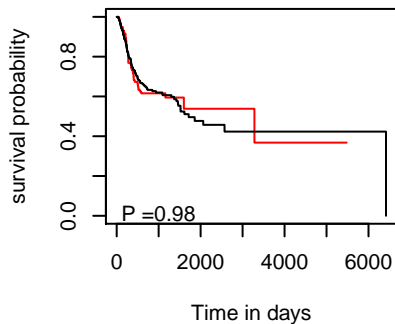**DFI hsa-mir-6870**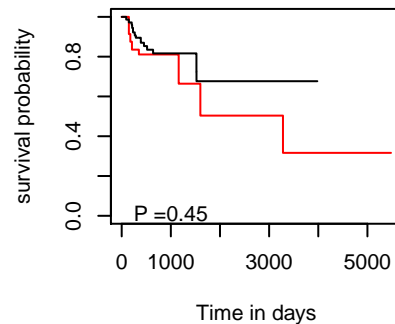**DSS hsa-mir-6870**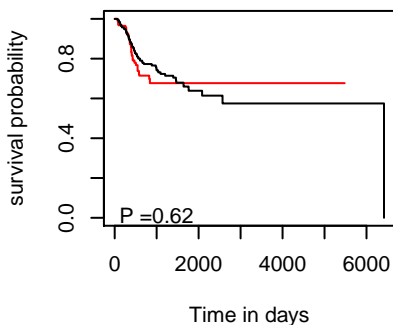**OS hsa-mir-153-1**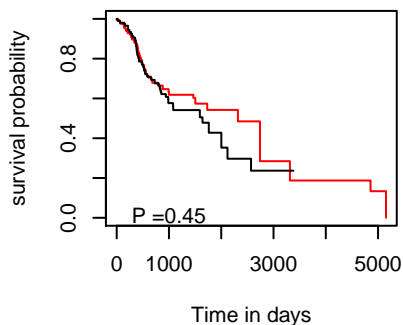**PFI hsa-mir-153-1**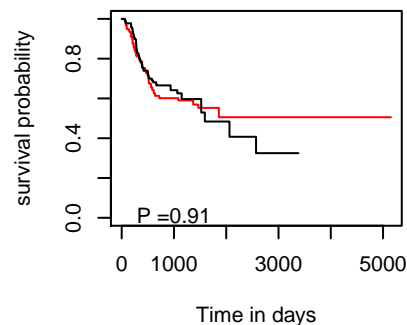**DFI hsa-mir-153-1**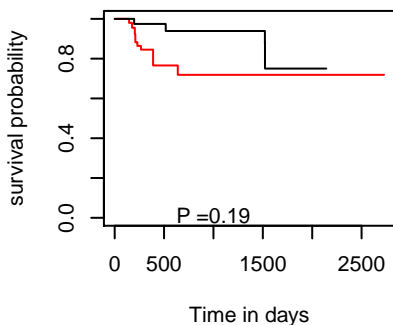**DSS hsa-mir-153-1**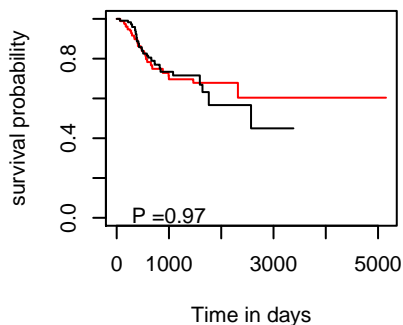**OS hsa-mir-2355**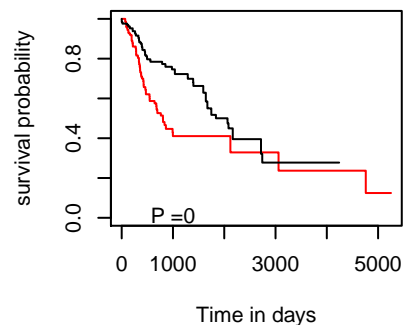

**PFI hsa-mir-2355**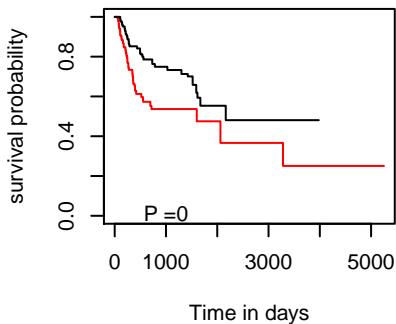**DFI hsa-mir-2355**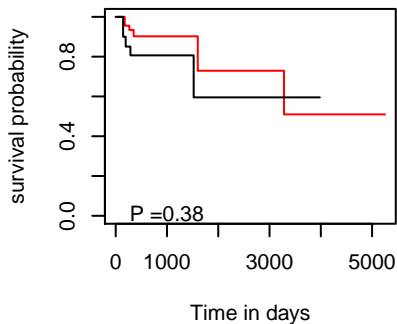**DSS hsa-mir-2355**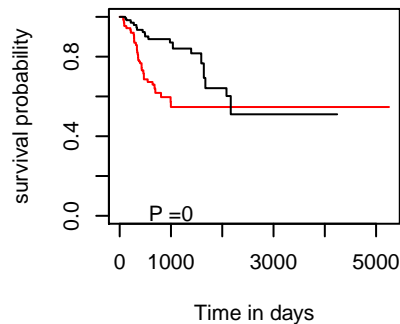**OS hsa-mir-6513**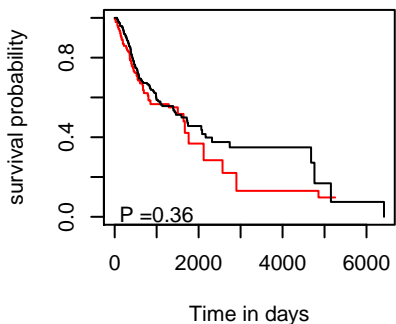**PFI hsa-mir-6513**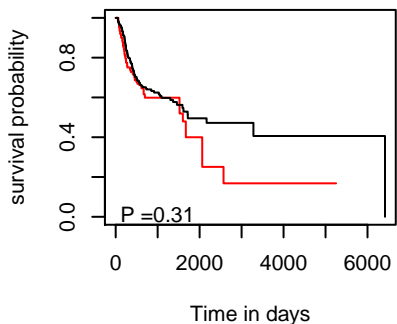**DFI hsa-mir-6513**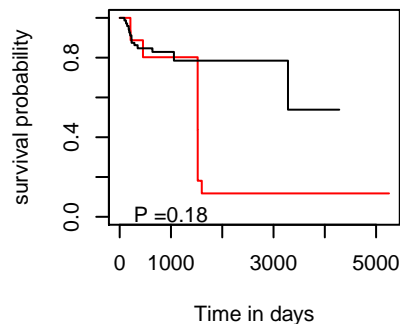**DSS hsa-mir-6513**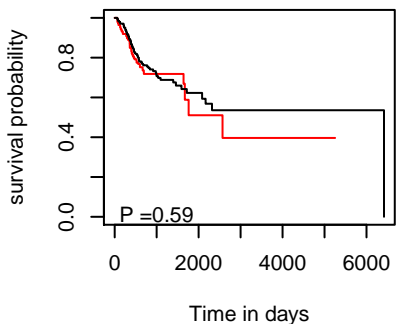**OS hsa-mir-210**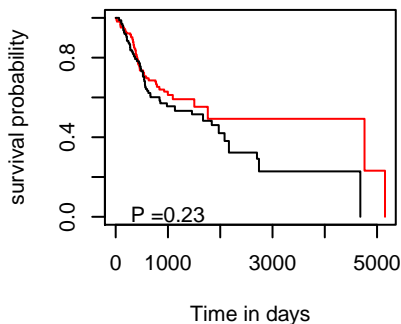**PFI hsa-mir-210**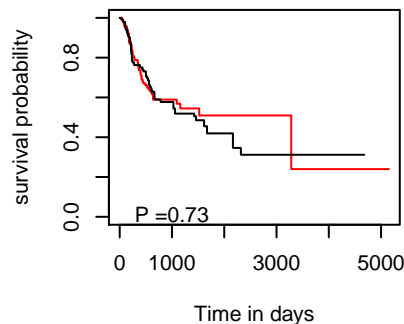

**DFI hsa-mir-210**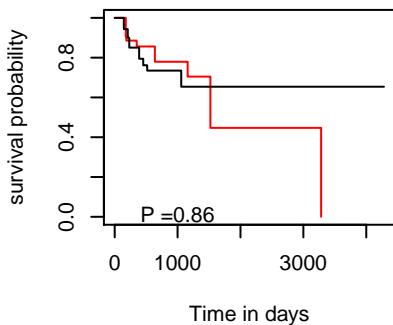**DSS hsa-mir-210**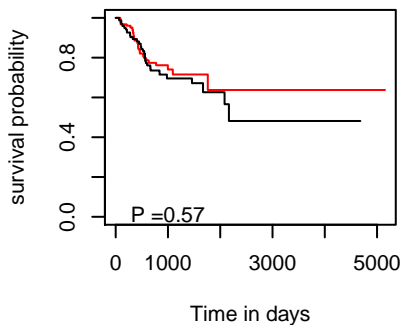**OS hsa-mir-185**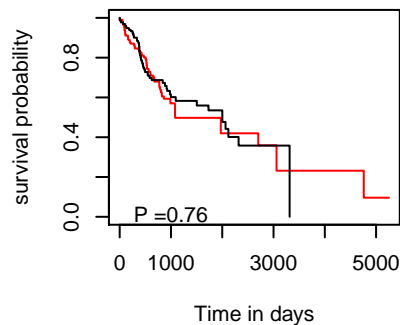**PFI hsa-mir-185**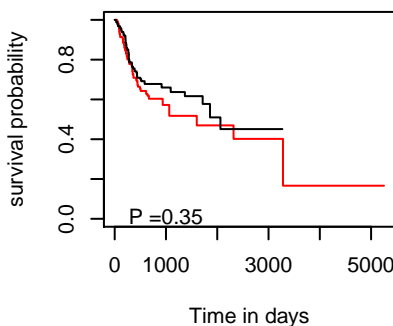**DFI hsa-mir-185**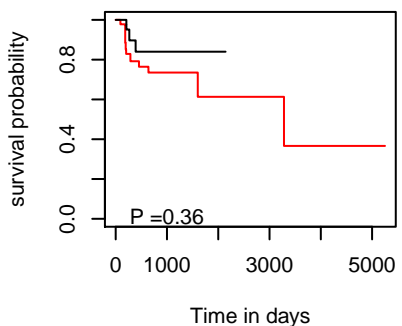**DSS hsa-mir-185**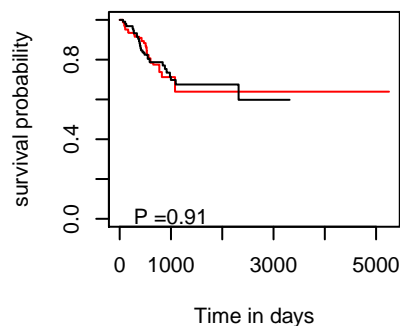**OS hsa-mir-6512**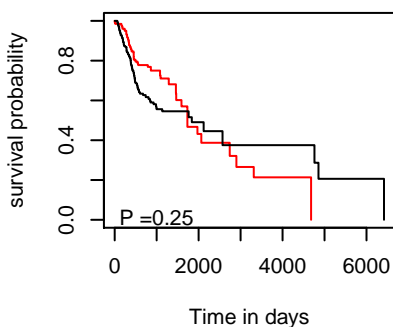**PFI hsa-mir-6512**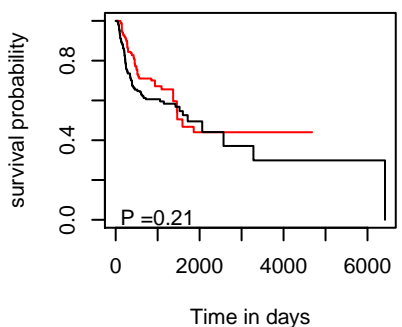**DFI hsa-mir-6512**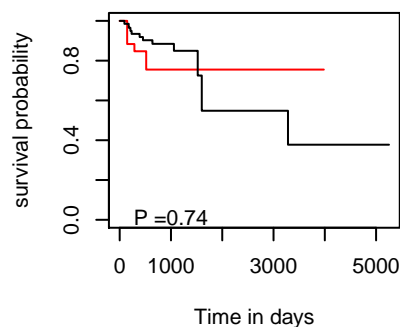

**DSS hsa-mir-6512**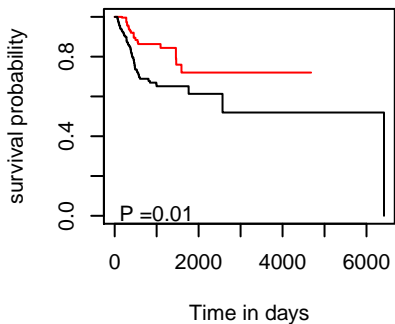**OS hsa-mir-10b**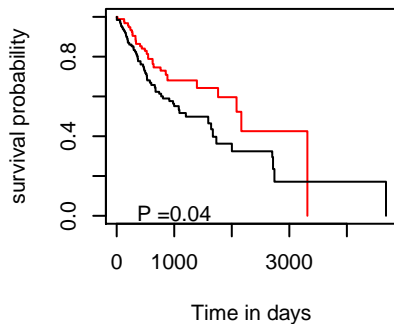**PFI hsa-mir-10b**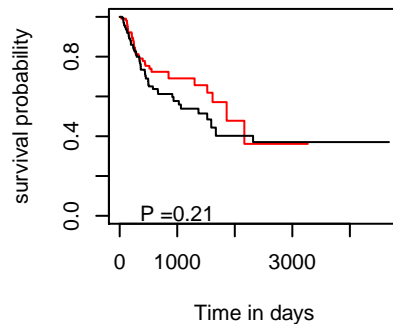**DFI hsa-mir-10b**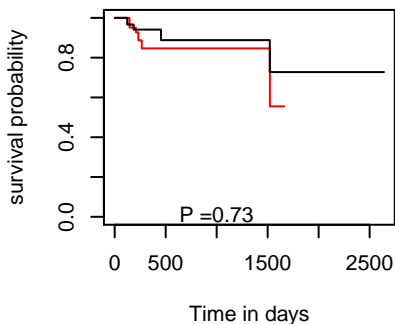**DSS hsa-mir-10b**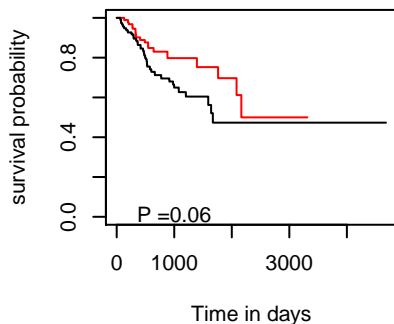**OS hsa-mir-375**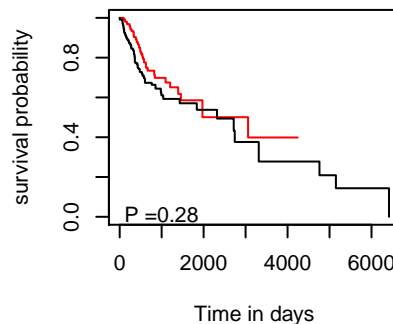**PFI hsa-mir-375**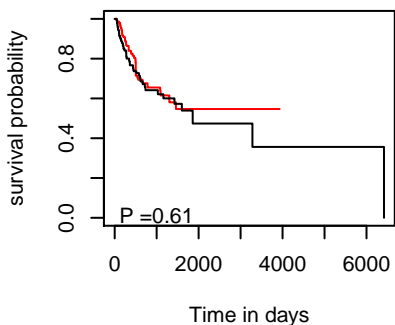**DFI hsa-mir-375**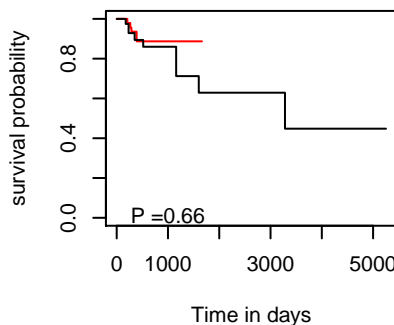**DSS hsa-mir-375**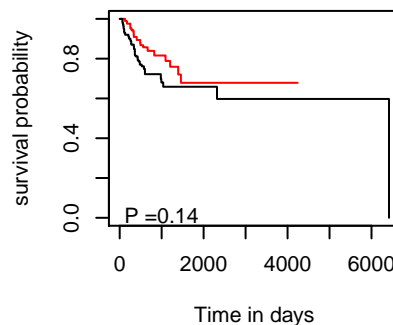

**OS hsa-mir-4776-2**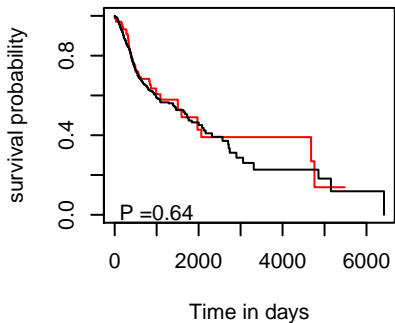**PFI hsa-mir-4776-2**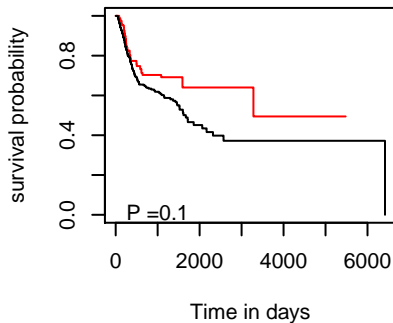**DFI hsa-mir-4776-2**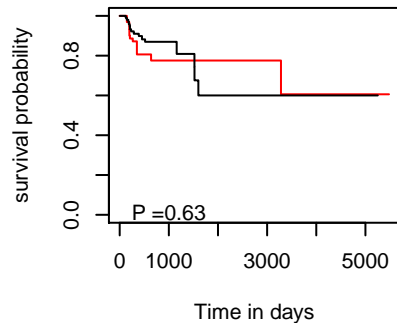**DSS hsa-mir-4776-2**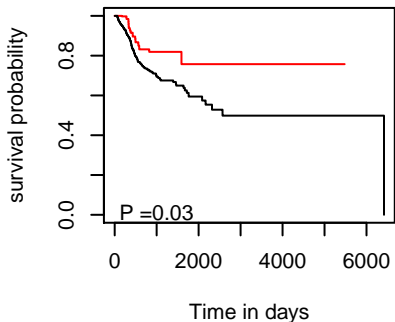**OS hsa-mir-5001**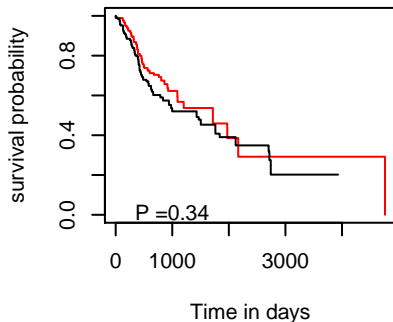**PFI hsa-mir-5001**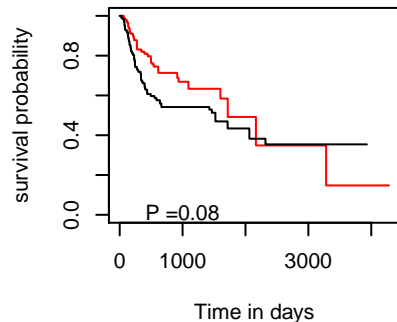**DFI hsa-mir-5001**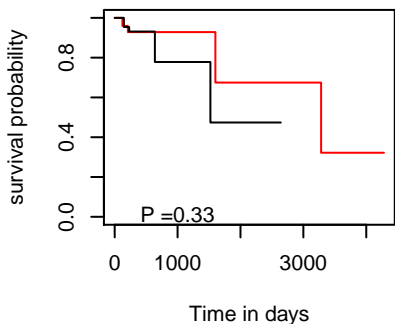**DSS hsa-mir-5001**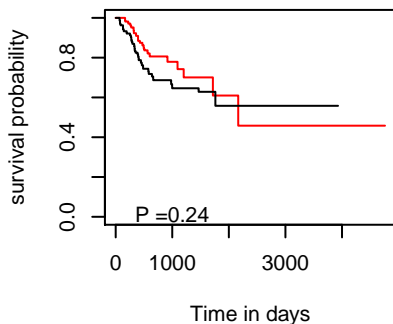**OS hsa-mir-1343**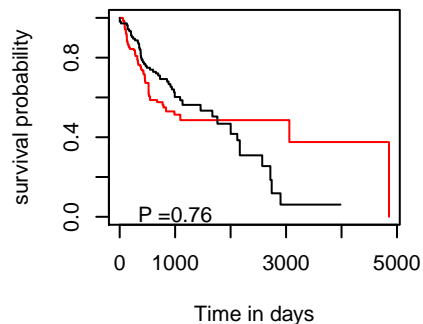

**PFI hsa-mir-1343**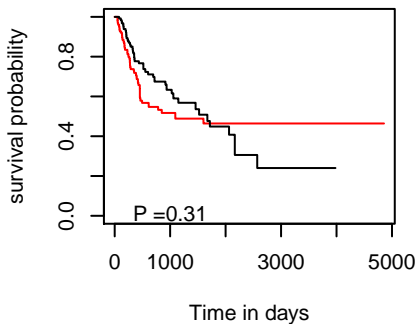**DFI hsa-mir-1343**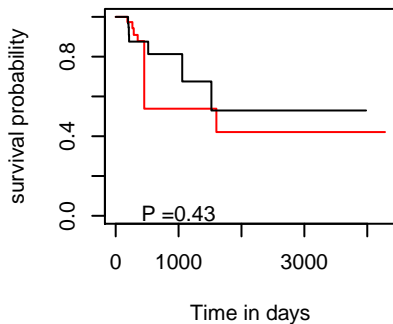**DSS hsa-mir-1343**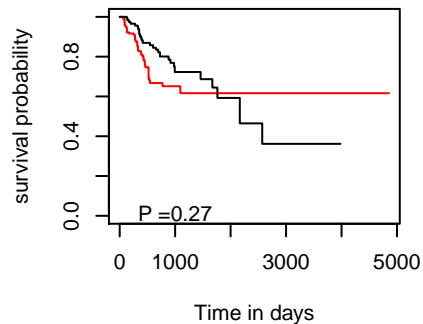**OS hsa-mir-483**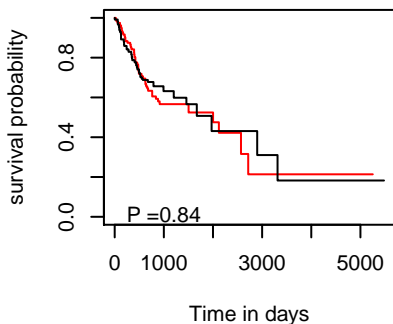**PFI hsa-mir-483**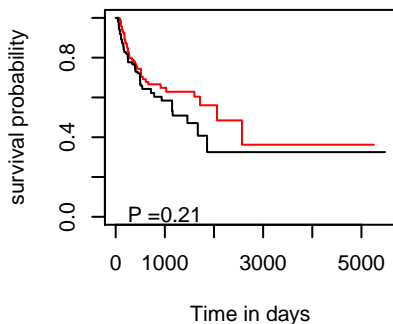**DFI hsa-mir-483**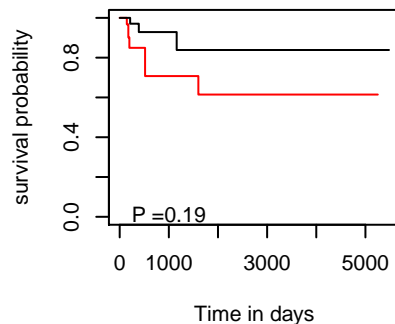**DSS hsa-mir-483**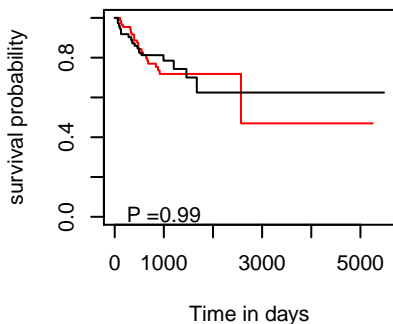**OS hsa-mir-675**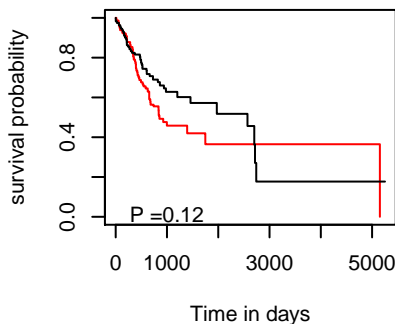**PFI hsa-mir-675**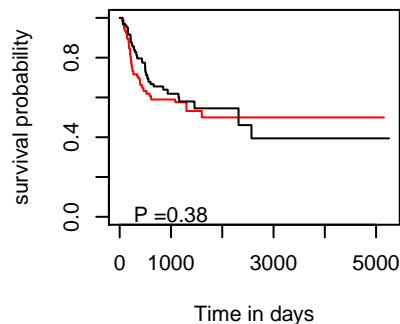

**DFI hsa-mir-675**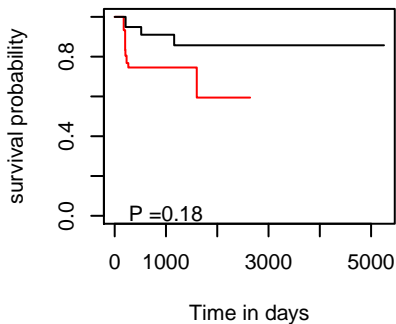**DSS hsa-mir-675**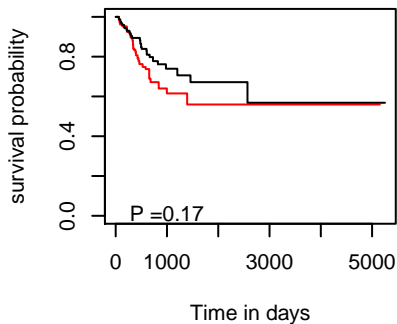**OS hsa-mir-3129**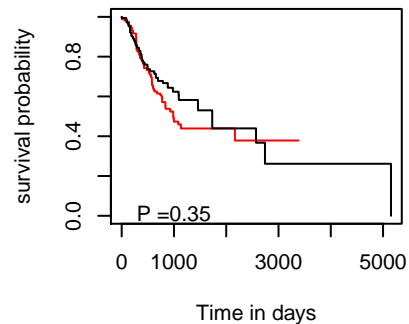**PFI hsa-mir-3129**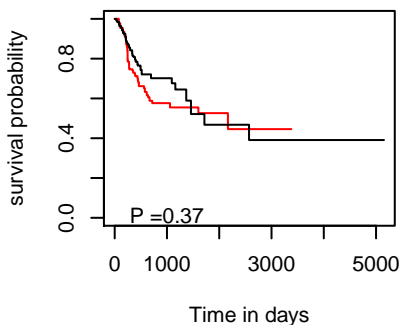**DFI hsa-mir-3129**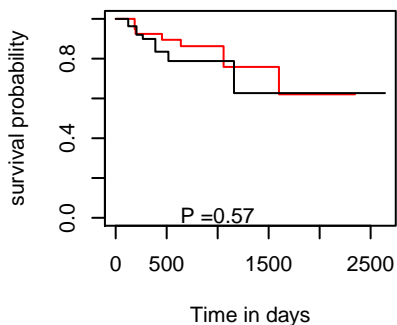**DSS hsa-mir-3129**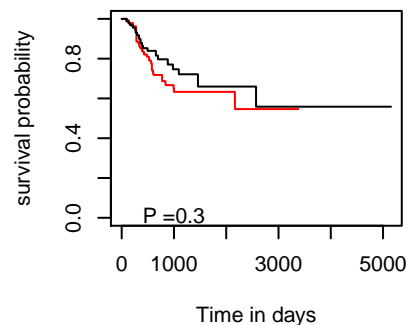**OS hsa-mir-3140**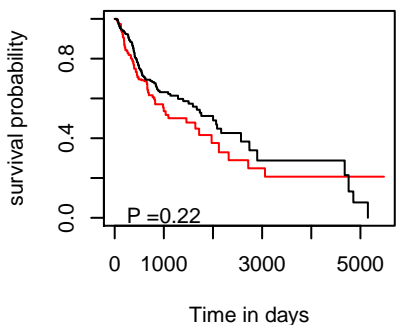**PFI hsa-mir-3140**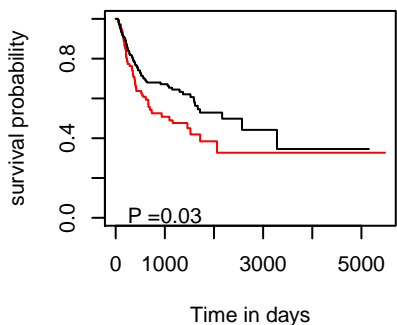**DFI hsa-mir-3140**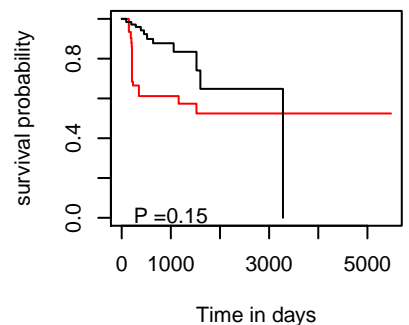

**DSS hsa-mir-3140**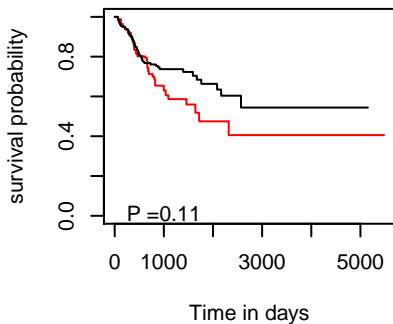**OS hsa-mir-3667**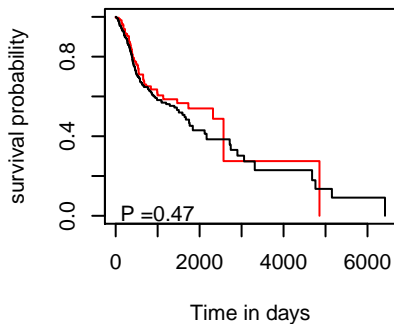**PFI hsa-mir-3667**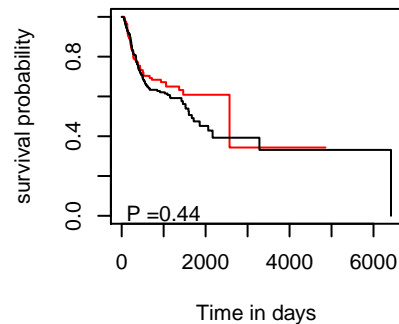**DFI hsa-mir-3667**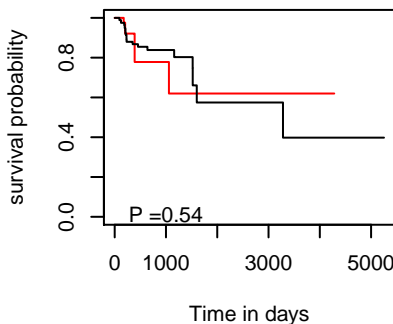**DSS hsa-mir-3667**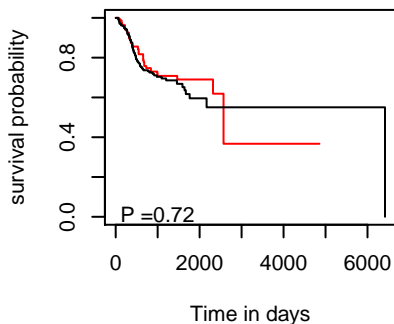**OS hsa-mir-26b**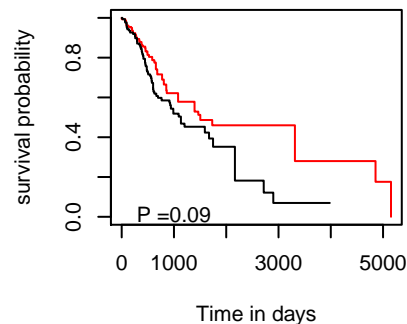**PFI hsa-mir-26b**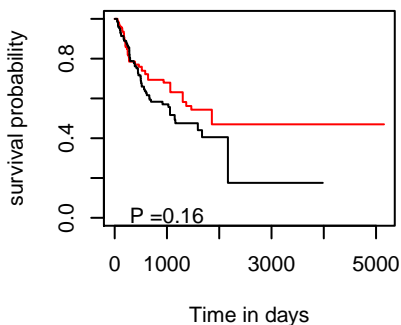**DFI hsa-mir-26b**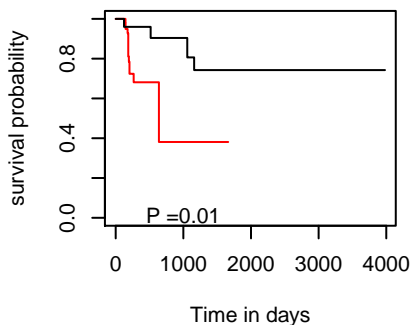**DSS hsa-mir-26b**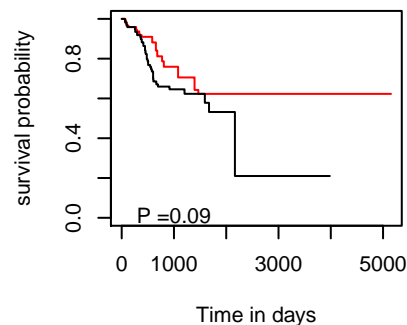

**OS hsa-mir-4444-2**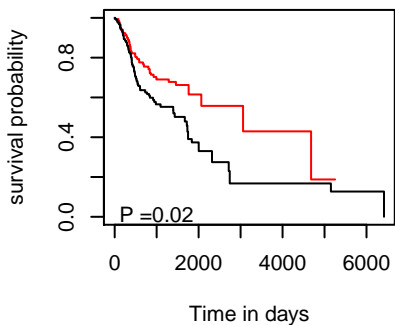**PFI hsa-mir-4444-2**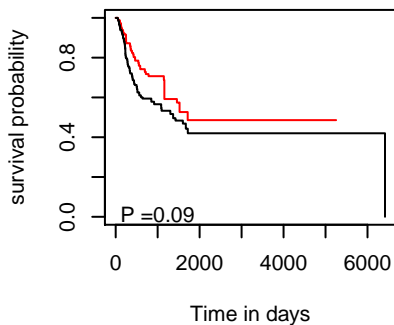**DFI hsa-mir-4444-2**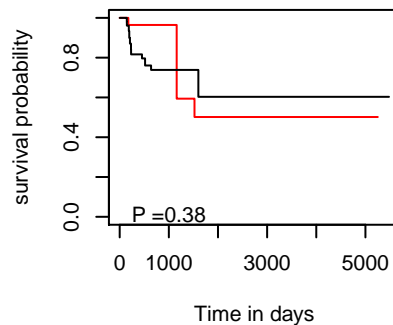**DSS hsa-mir-4444-2**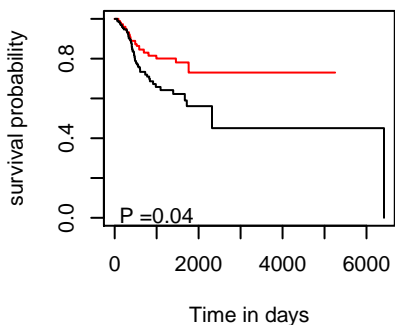**OS hsa-mir-4453**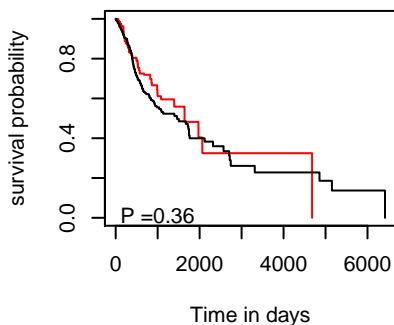**PFI hsa-mir-4453**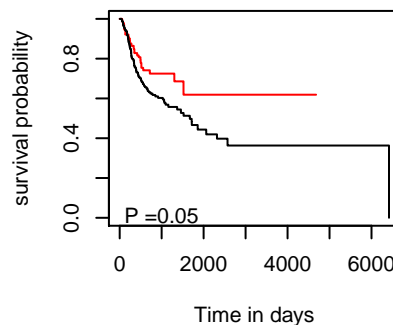**DFI hsa-mir-4453**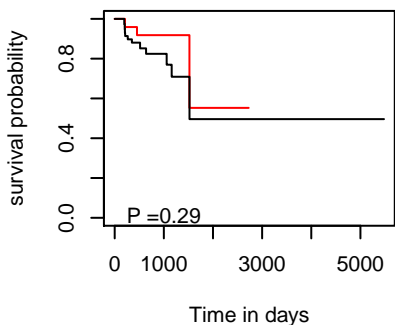**DSS hsa-mir-4453**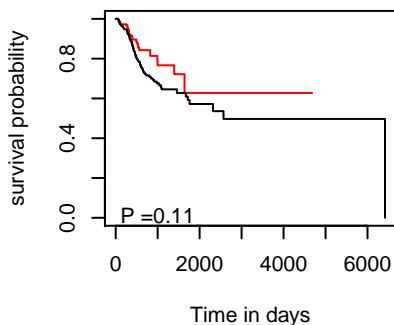**OS hsa-mir-4777**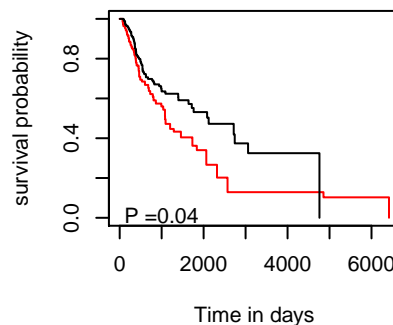

**PFI hsa-mir-4777**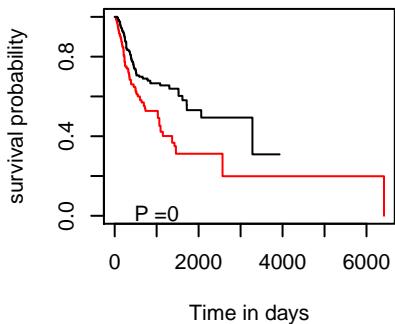**DFI hsa-mir-4777**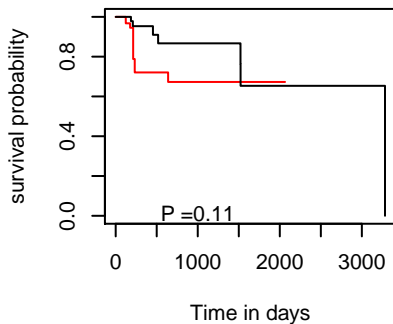**DSS hsa-mir-4777**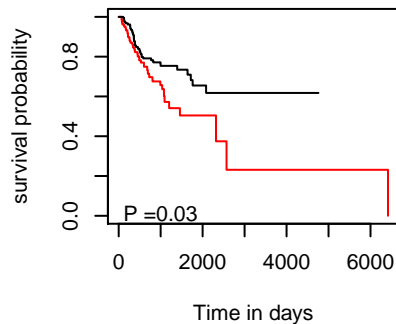**OS hsa-mir-4786**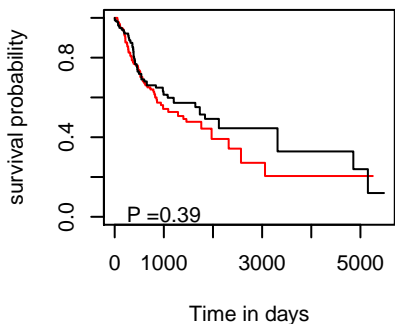**PFI hsa-mir-4786**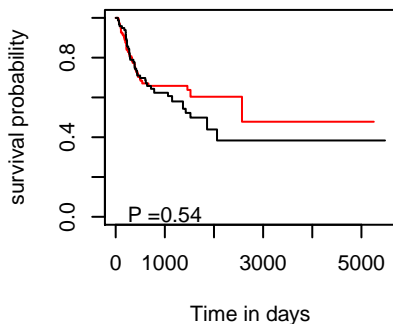**DFI hsa-mir-4786**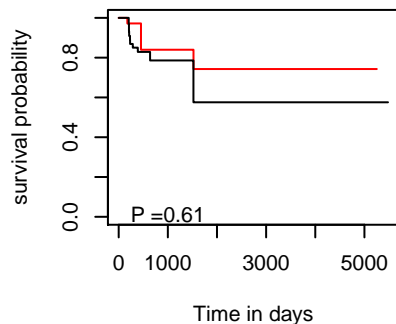**DSS hsa-mir-4786**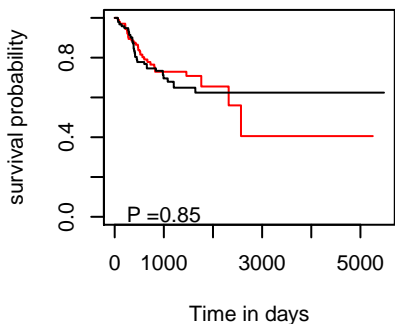**OS hsa-mir-6755**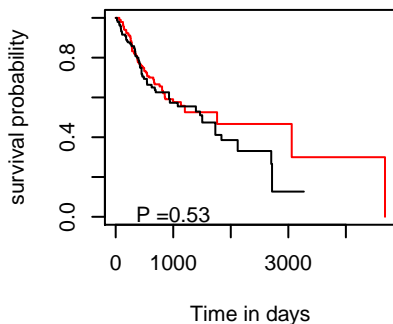**PFI hsa-mir-6755**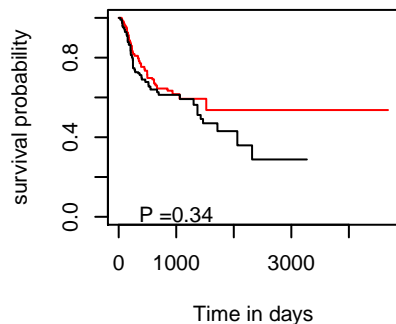

**DFI hsa-mir-6755**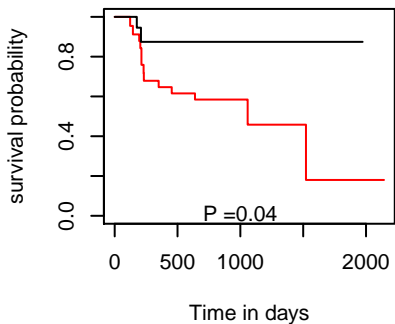**DSS hsa-mir-6755**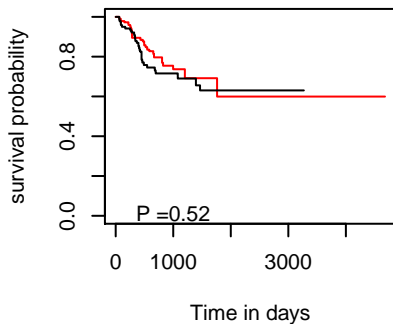**OS hsa-mir-1258**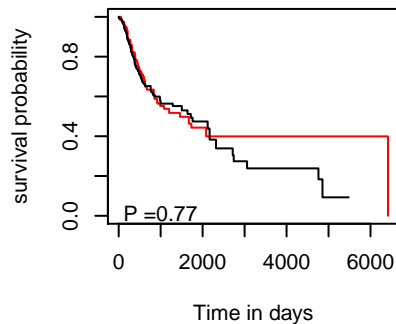**PFI hsa-mir-1258**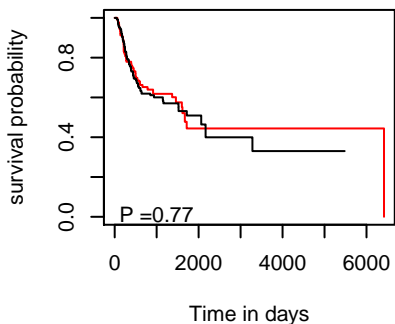**DFI hsa-mir-1258**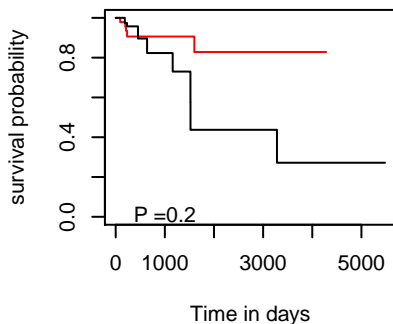**DSS hsa-mir-1258**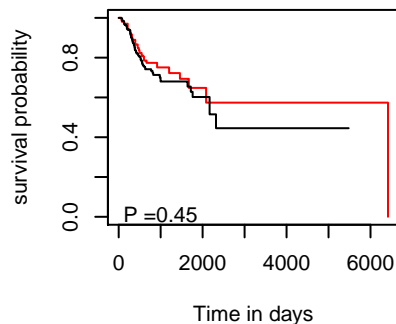**OS hsa-mir-411**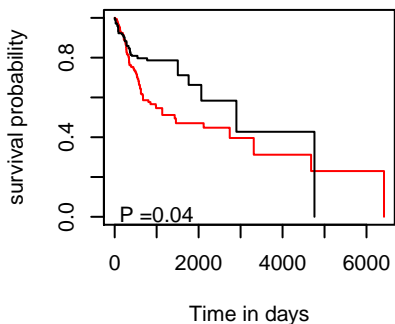**PFI hsa-mir-411**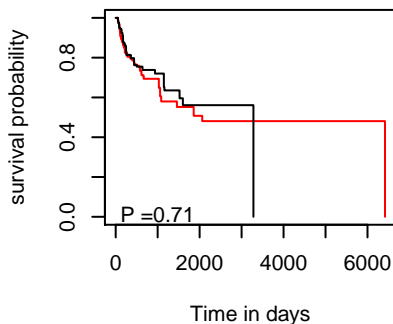**DFI hsa-mir-411**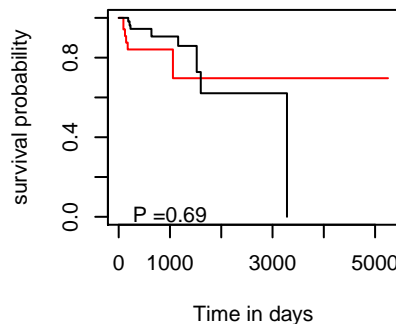

**DSS hsa-mir-411**

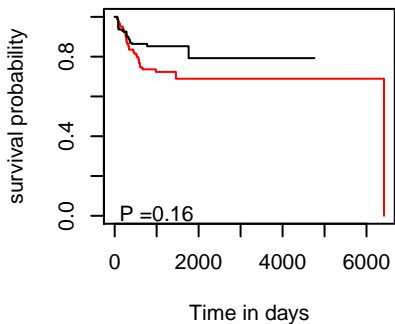

**OS hsa-mir-7845**

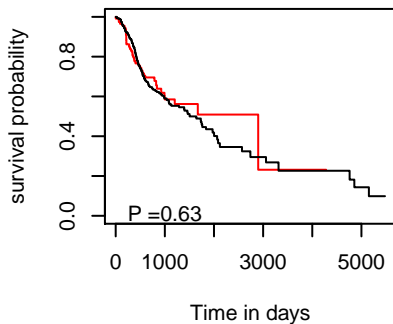

**PFI hsa-mir-7845**

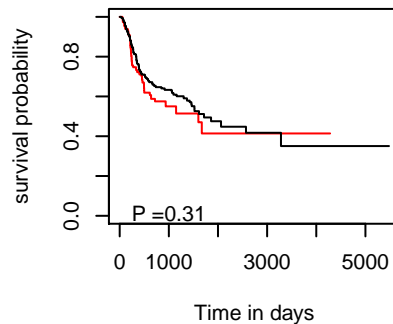

**DFI hsa-mir-7845**

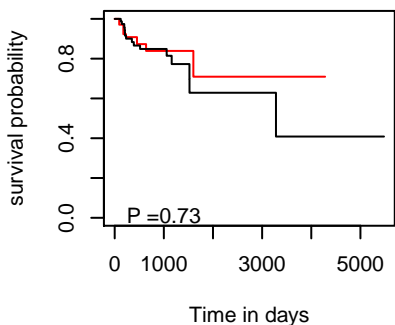

**DSS hsa-mir-7845**

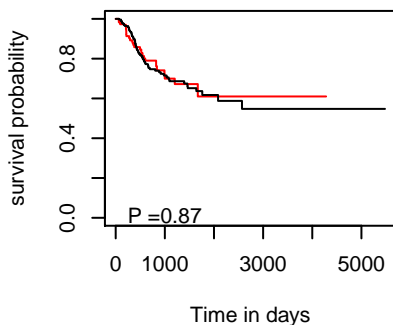

**OS hsa-mir-4525**

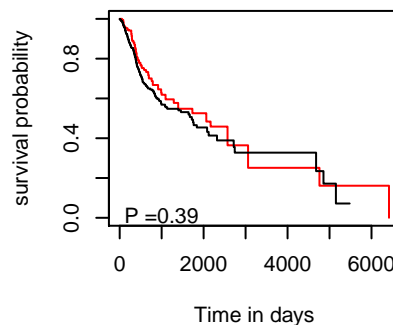

**PFI hsa-mir-4525**

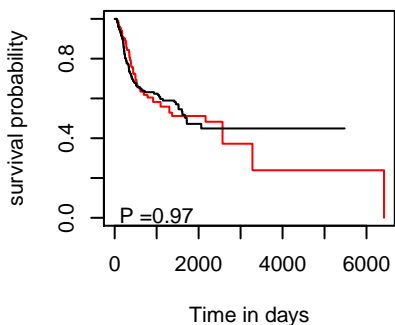

**DFI hsa-mir-4525**

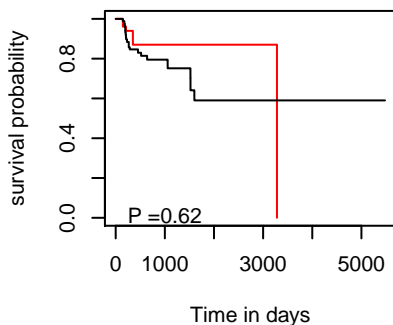

**DSS hsa-mir-4525**

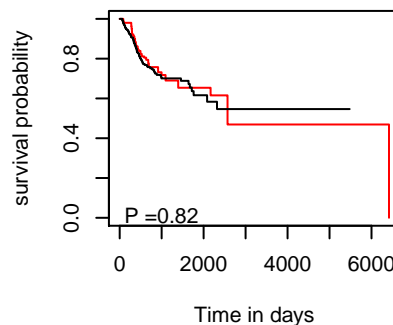

**OS hsa-mir-3130-1**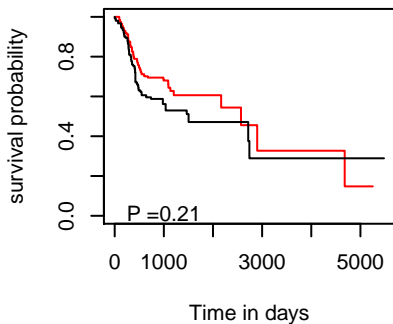**PFI hsa-mir-3130-1**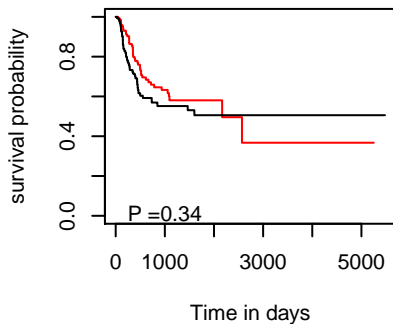**DFI hsa-mir-3130-1**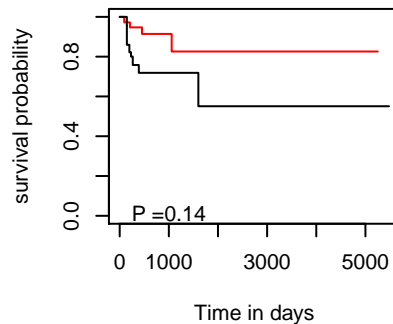**DSS hsa-mir-3130-1**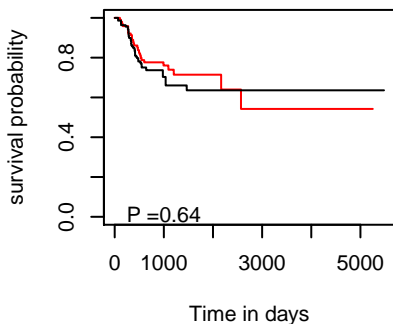**OS hsa-mir-873**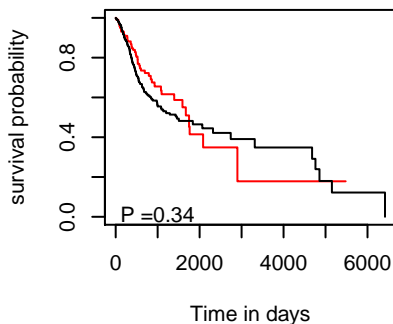**PFI hsa-mir-873**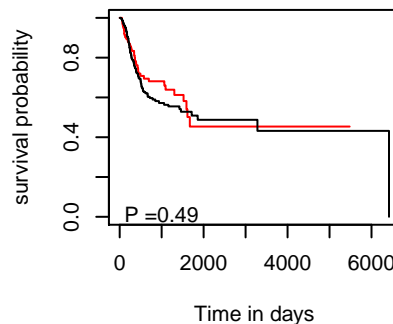**DFI hsa-mir-873**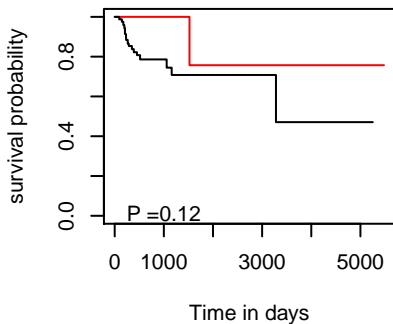**DSS hsa-mir-873**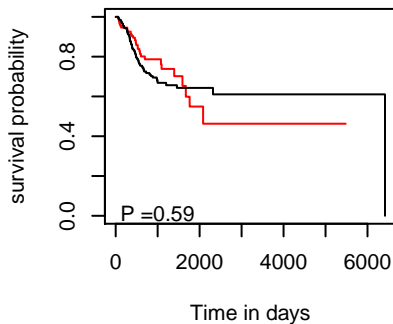**OS hsa-mir-149**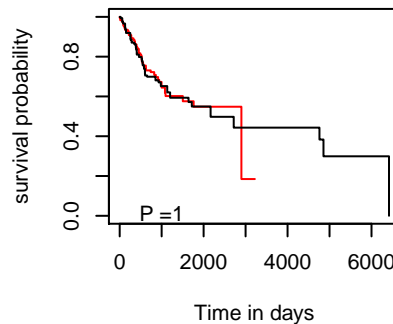

**PFI hsa-mir-149**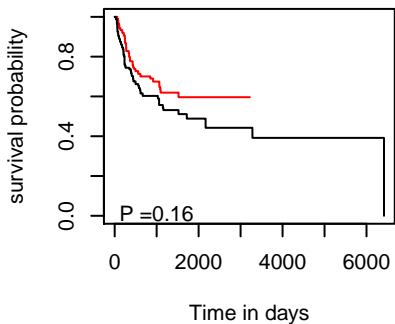**DFI hsa-mir-149**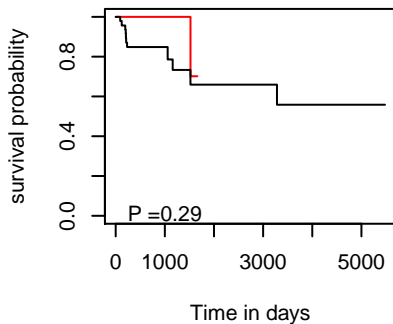**DSS hsa-mir-149**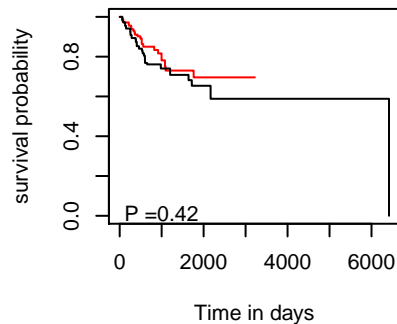**OS hsa-mir-5699**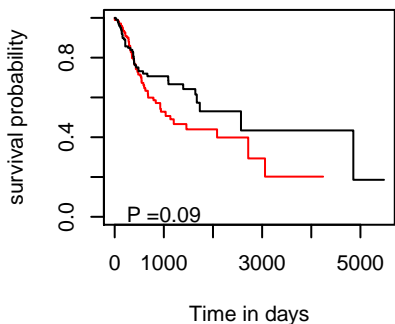**PFI hsa-mir-5699**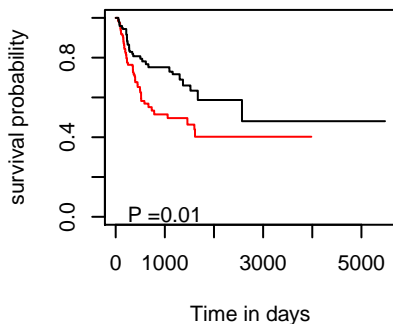**DFI hsa-mir-5699**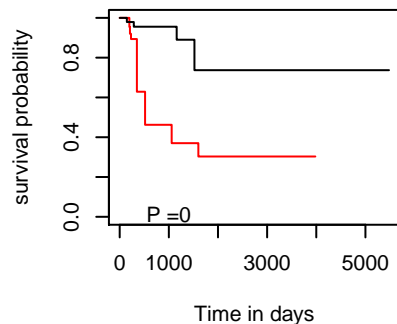**DSS hsa-mir-5699**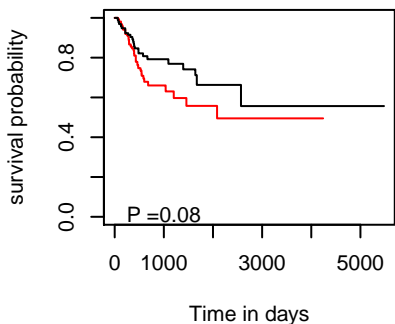**OS hsa-mir-4522**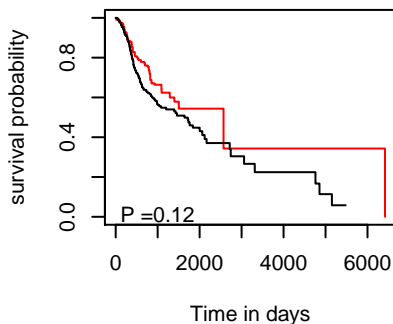**PFI hsa-mir-4522**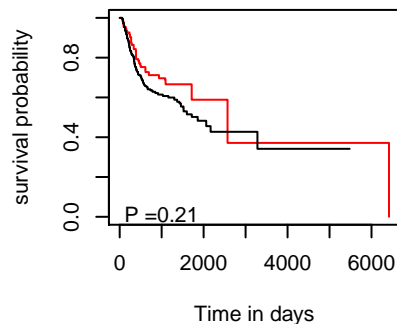

**DFI hsa-mir-4522**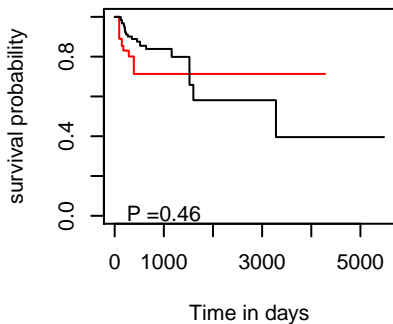**DSS hsa-mir-4522**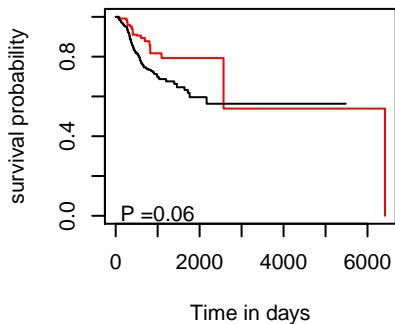**OS hsa-mir-6502**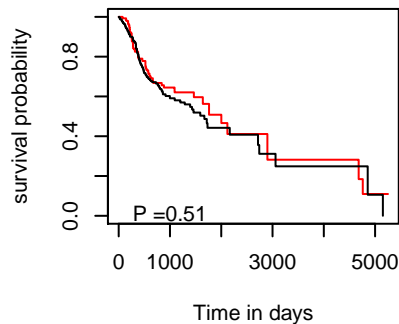**PFI hsa-mir-6502**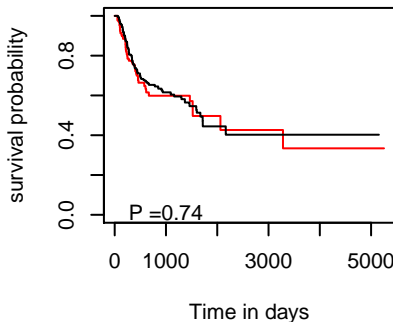**DFI hsa-mir-6502**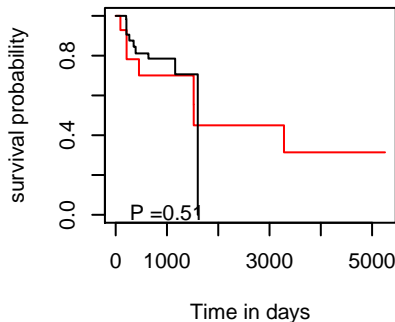**DSS hsa-mir-6502**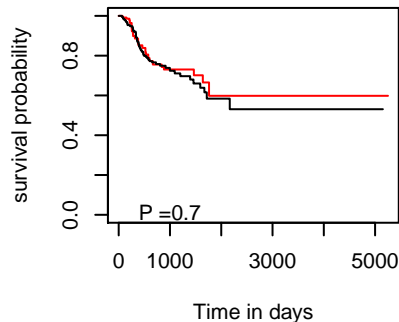**OS hsa-mir-208b**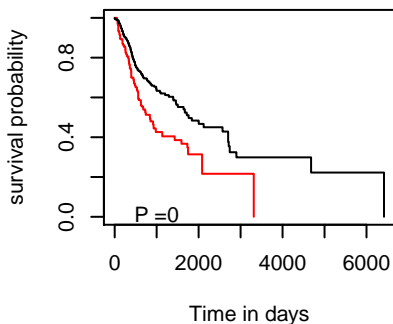**PFI hsa-mir-208b**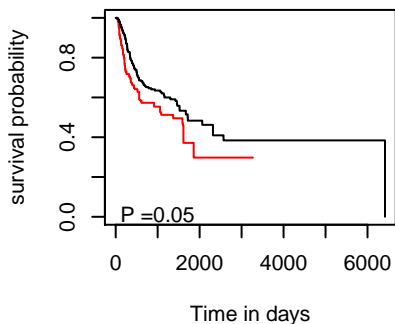**DFI hsa-mir-208b**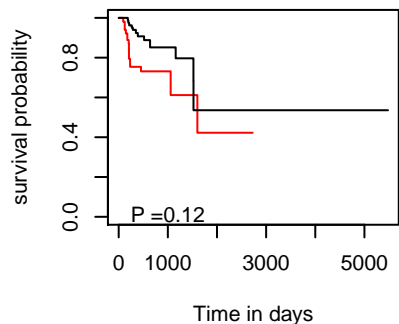

**DSS hsa-mir-208b**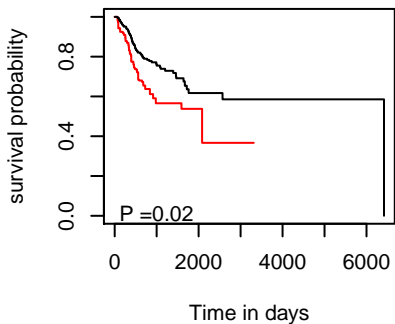**OS hsa-mir-151a**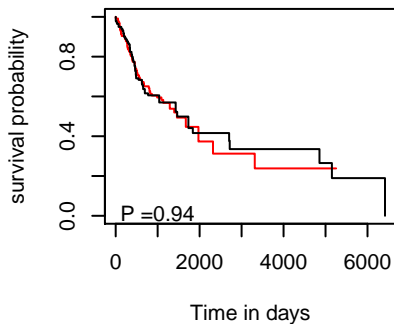**PFI hsa-mir-151a**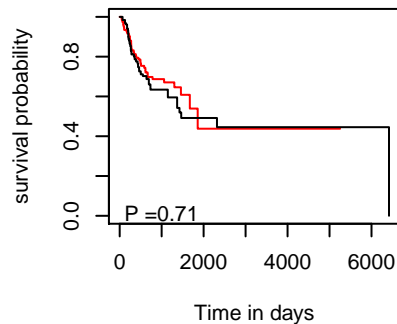**DFI hsa-mir-151a**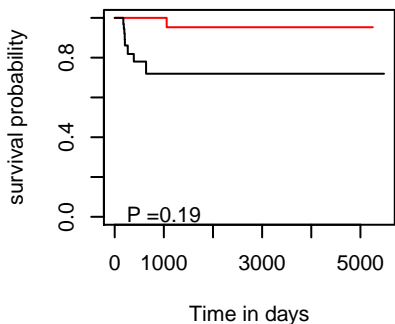**DSS hsa-mir-151a**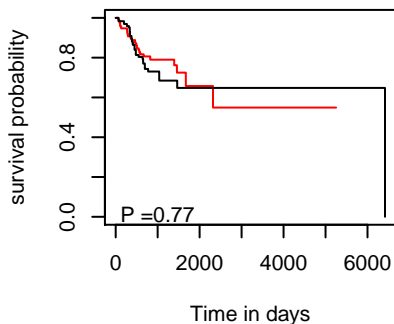**OS hsa-mir-30d**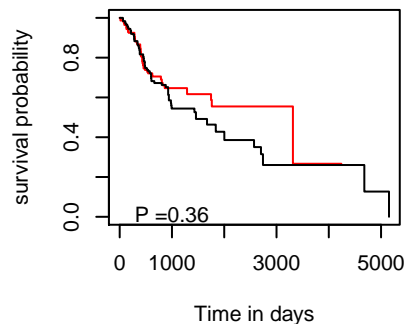**PFI hsa-mir-30d**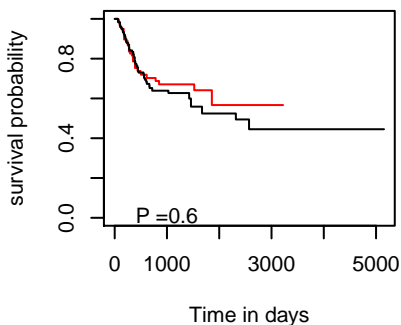**DFI hsa-mir-30d**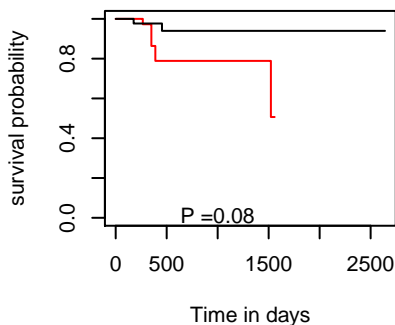**DSS hsa-mir-30d**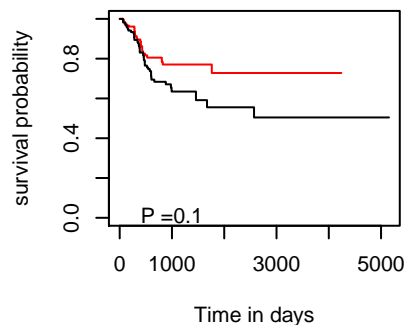

**OS hsa-mir-6885**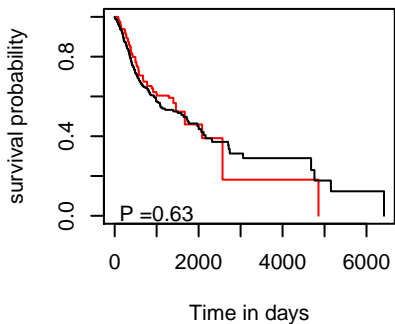**PFI hsa-mir-6885**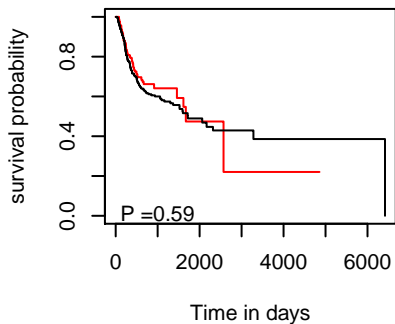**DFI hsa-mir-6885**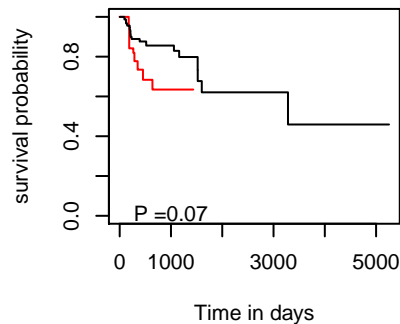**DSS hsa-mir-6885**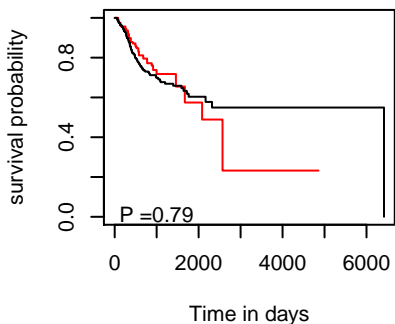**OS hsa-mir-548t**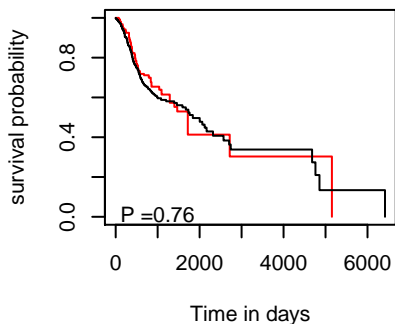**PFI hsa-mir-548t**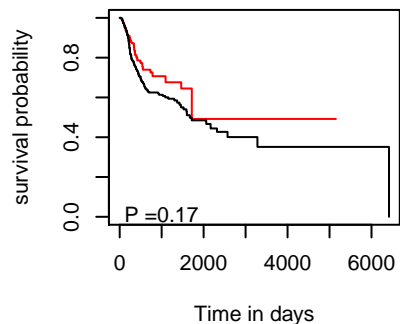**DFI hsa-mir-548t**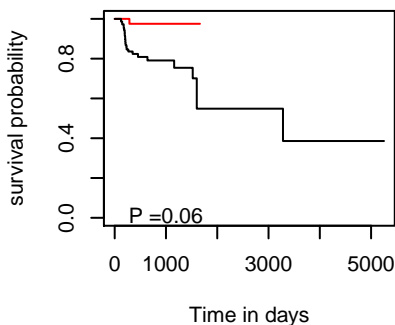**DSS hsa-mir-548t**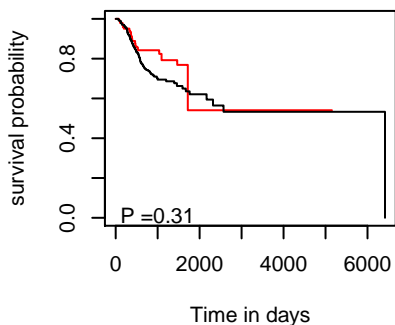**OS hsa-mir-345**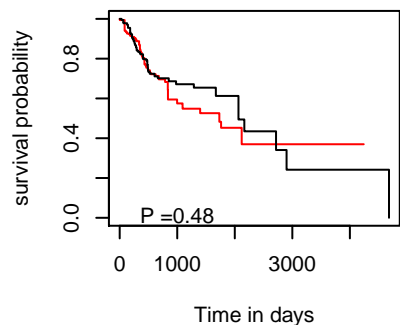

**PFI hsa-mir-345**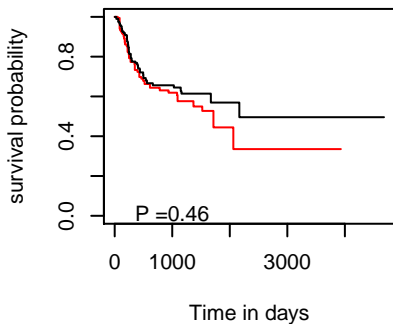**DFI hsa-mir-345**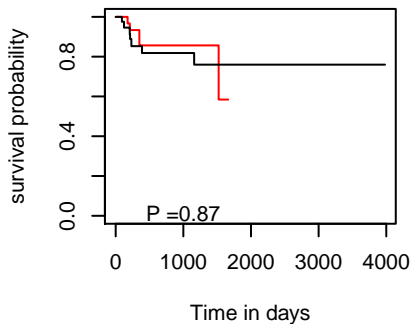**DSS hsa-mir-345**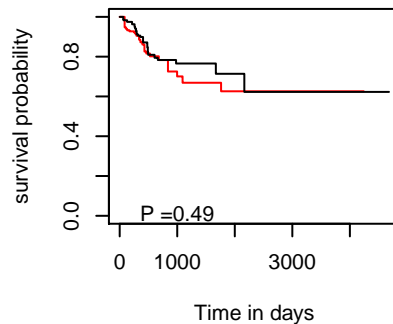**OS hsa-mir-655**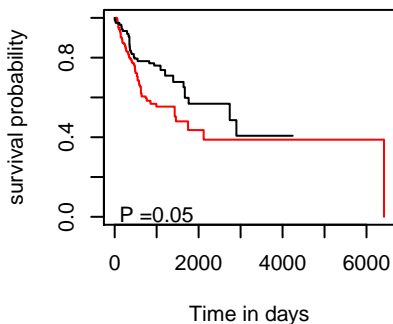**PFI hsa-mir-655**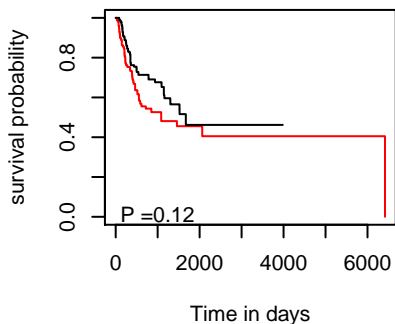**DFI hsa-mir-655**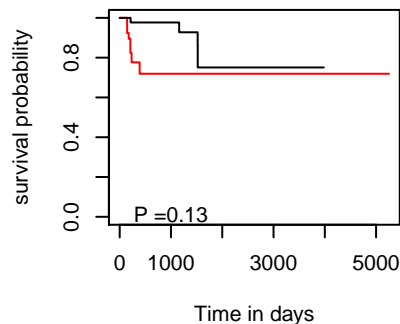**DSS hsa-mir-655**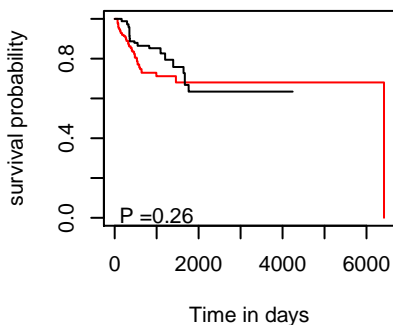**OS hsa-mir-323b**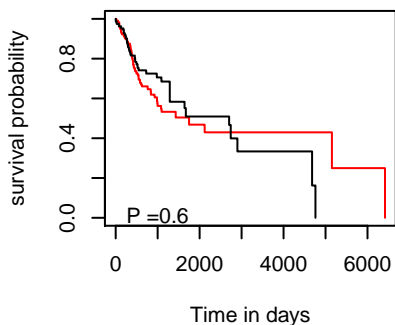**PFI hsa-mir-323b**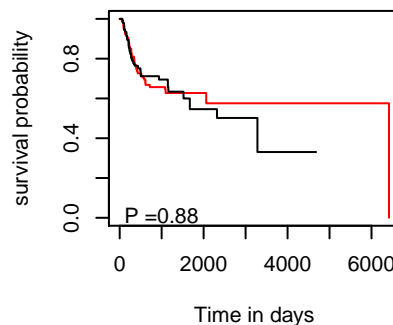

**DFI hsa-mir-323b**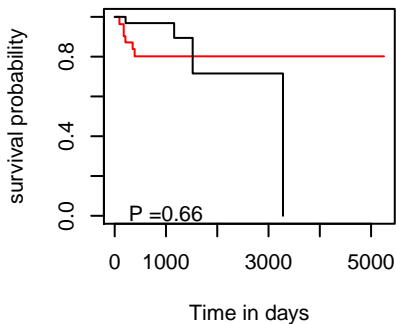**DSS hsa-mir-323b**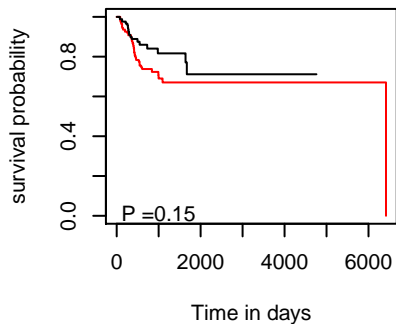**OS hsa-mir-369**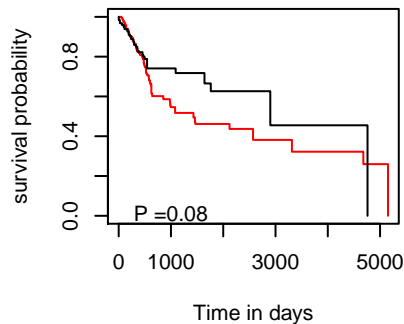**PFI hsa-mir-369**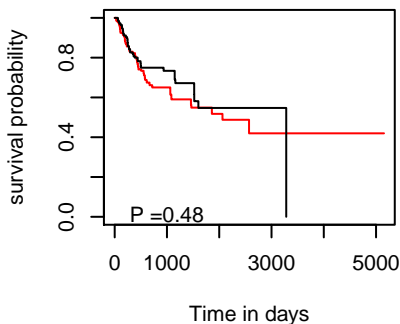**DFI hsa-mir-369**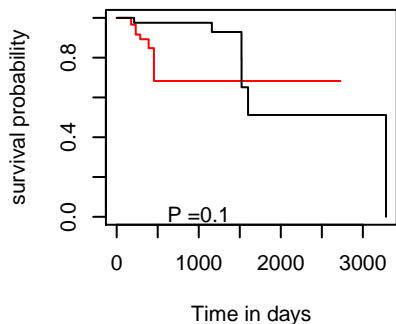**DSS hsa-mir-369**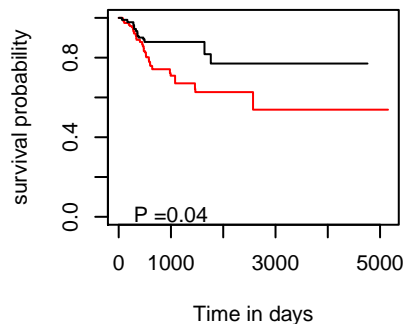**OS hsa-mir-379**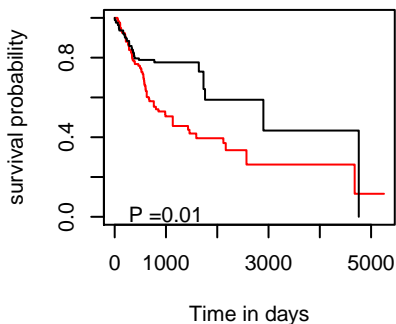**PFI hsa-mir-379**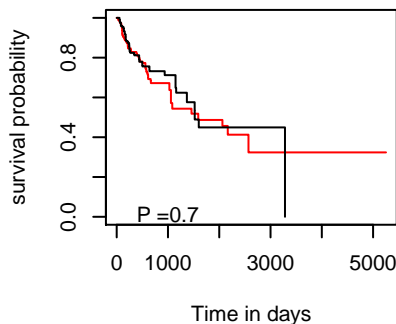**DFI hsa-mir-379**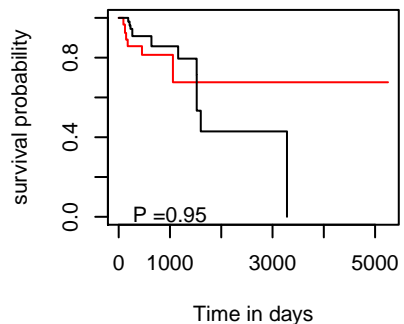

**DSS hsa-mir-379**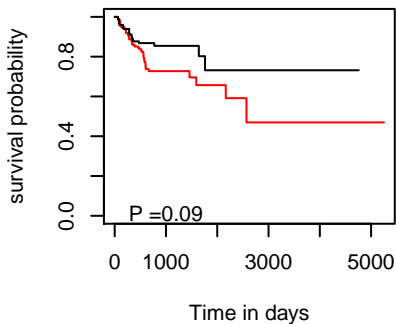**OS hsa-mir-496**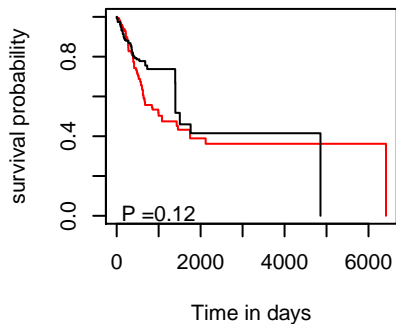**PFI hsa-mir-496**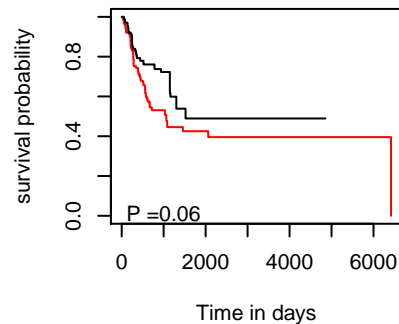**DFI hsa-mir-496**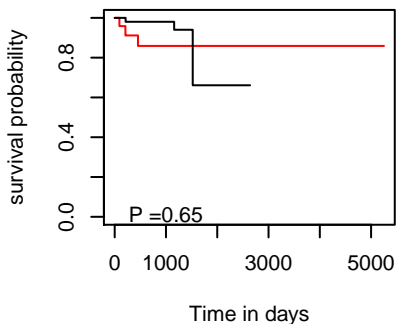**DSS hsa-mir-496**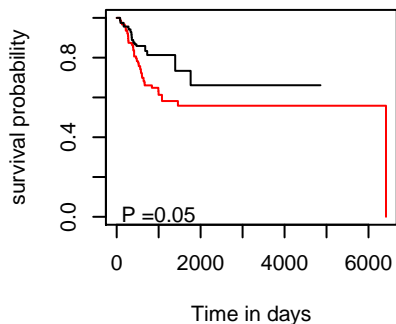**OS hsa-mir-654**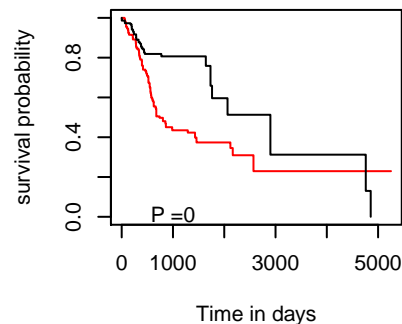**PFI hsa-mir-654**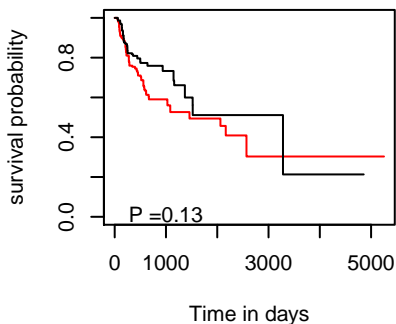**DFI hsa-mir-654**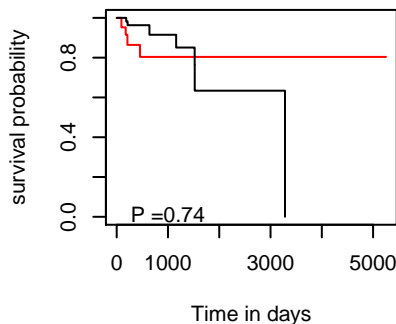**DSS hsa-mir-654**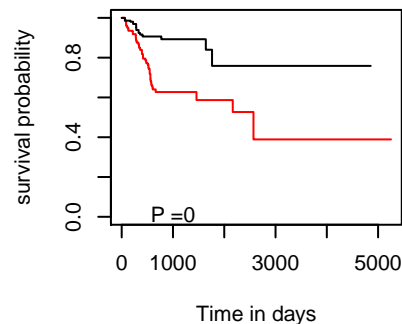

**OS hsa-mir-7704**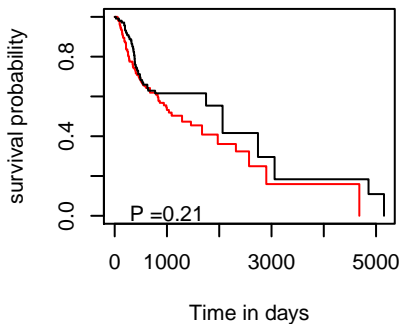**PFI hsa-mir-7704**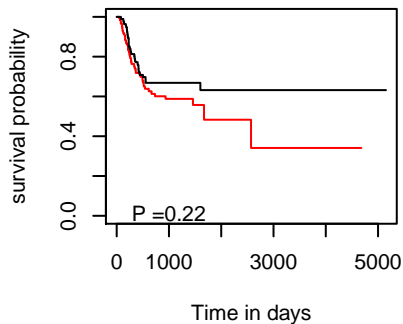**DFI hsa-mir-7704**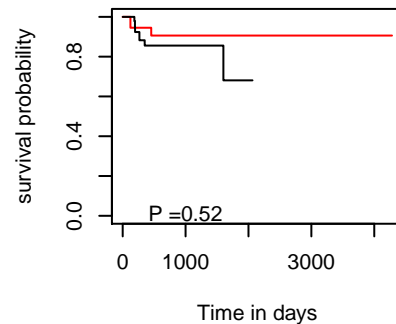**DSS hsa-mir-7704**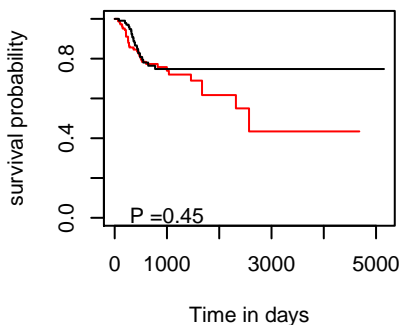**OS hsa-mir-5703**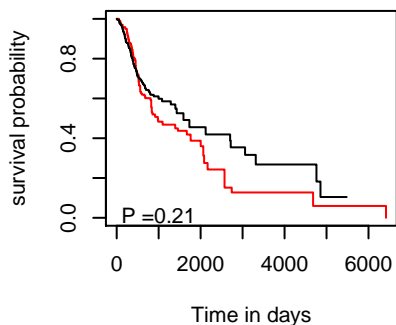**PFI hsa-mir-5703**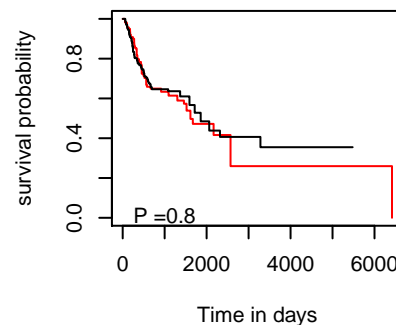**DFI hsa-mir-5703**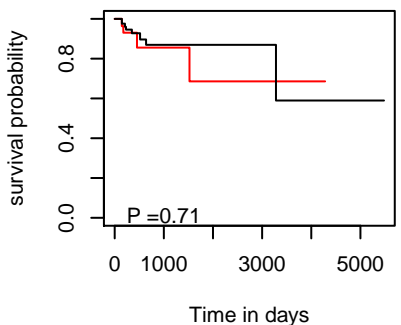**DSS hsa-mir-5703**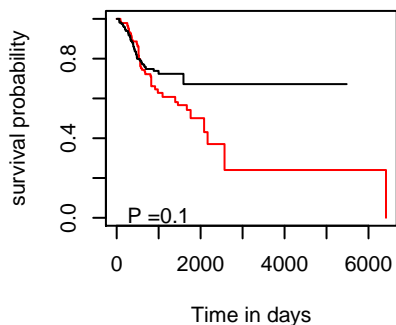**OS hsa-mir-134**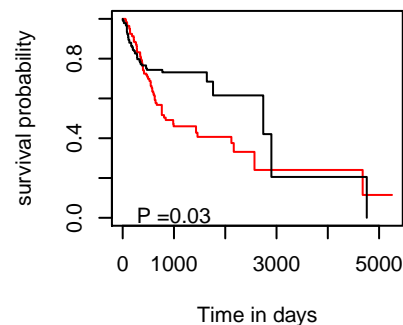

**PFI hsa-mir-134**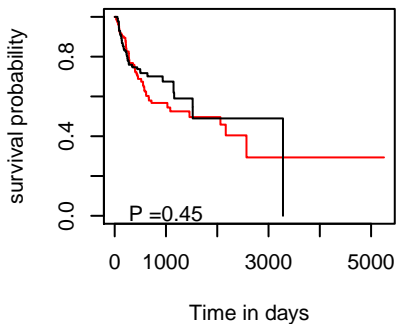**DFI hsa-mir-134**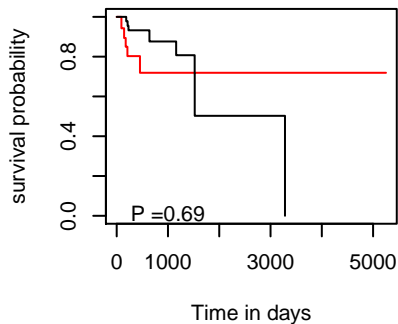**DSS hsa-mir-134**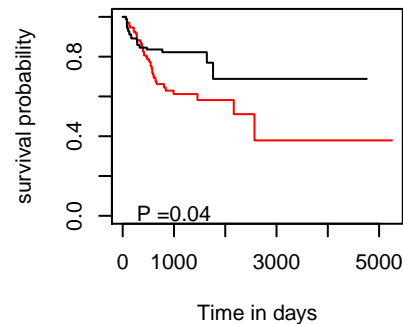**OS hsa-mir-382**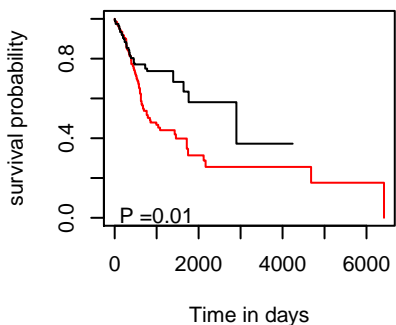**PFI hsa-mir-382**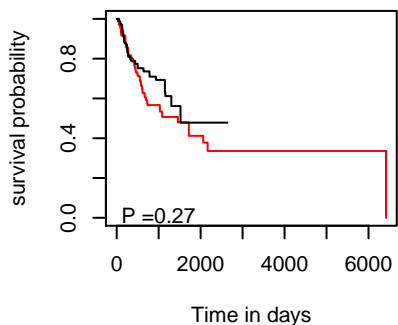**DFI hsa-mir-382**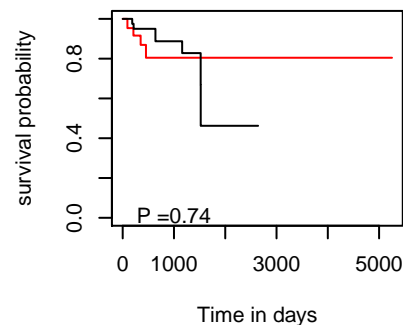**DSS hsa-mir-382**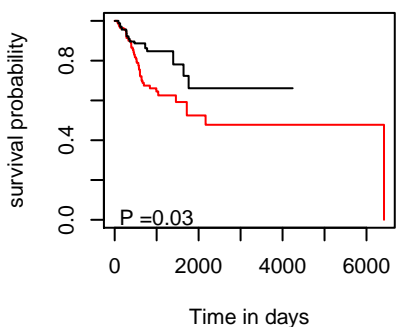**OS hsa-mir-4444-1**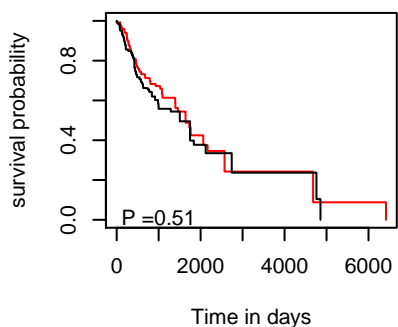**PFI hsa-mir-4444-1**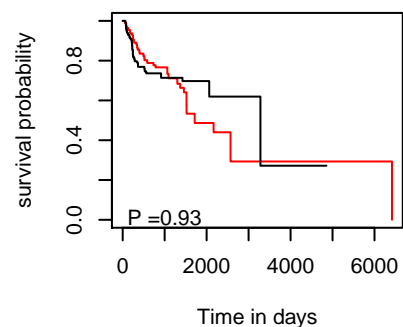

**DFI hsa-mir-4444-1**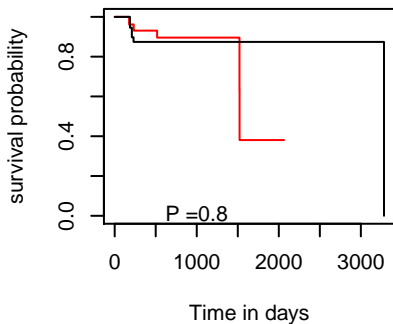**DSS hsa-mir-4444-1**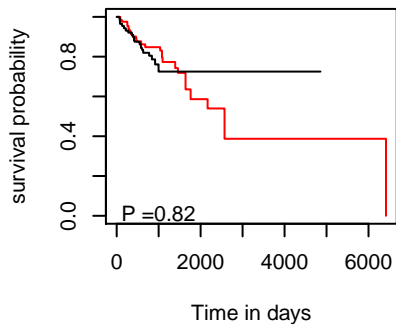**OS hsa-mir-4999**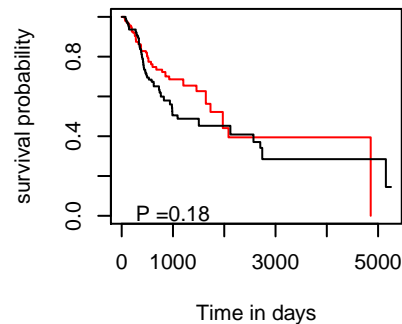**PFI hsa-mir-4999**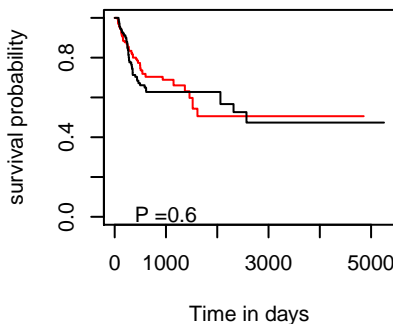**DFI hsa-mir-4999**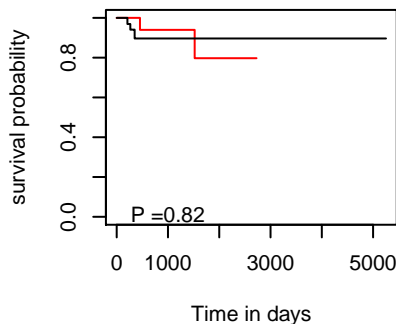**DSS hsa-mir-4999**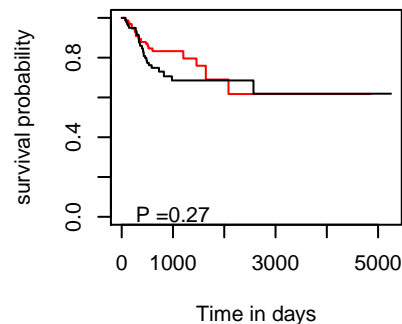**OS hsa-mir-4746**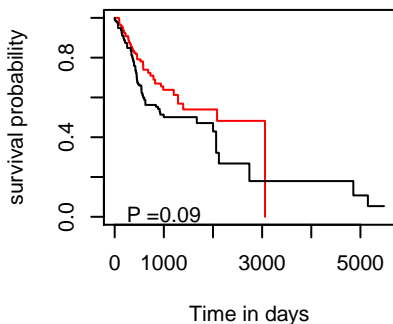**PFI hsa-mir-4746**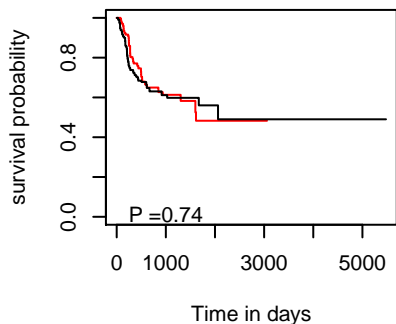**DFI hsa-mir-4746**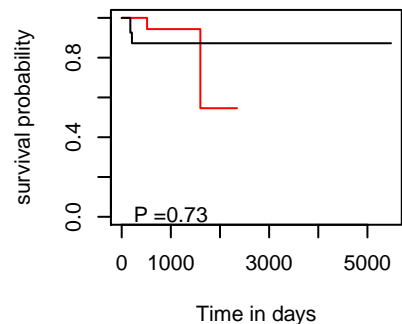

**DSS hsa-mir-4746**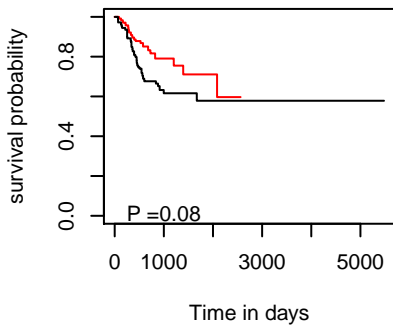**OS hsa-mir-3193**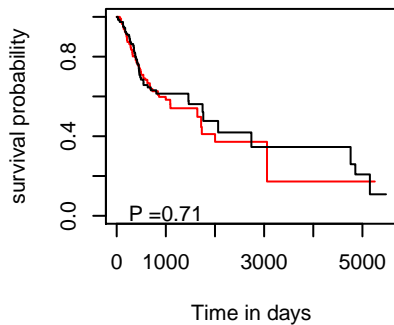**PFI hsa-mir-3193**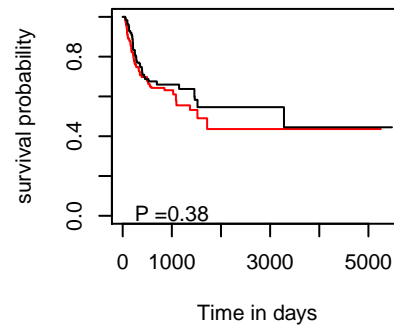**DFI hsa-mir-3193**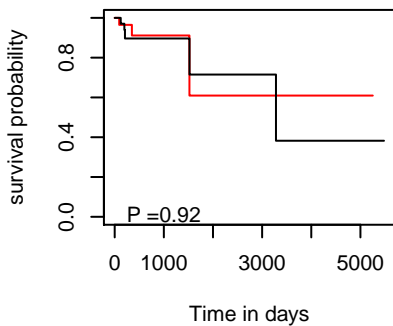**DSS hsa-mir-3193**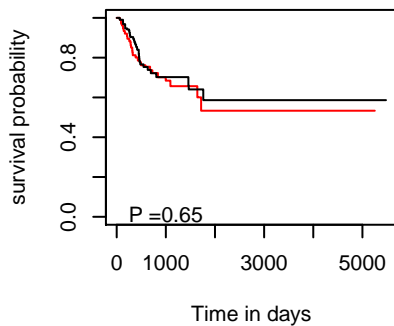**OS hsa-mir-1306**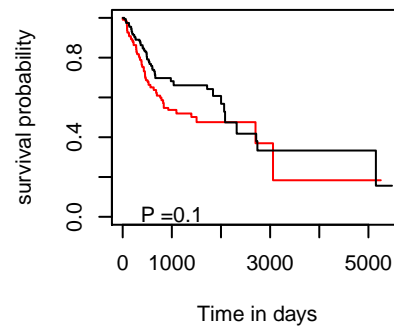**PFI hsa-mir-1306**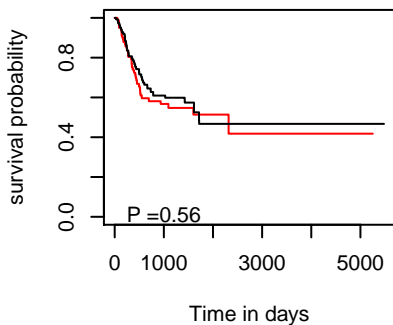**DFI hsa-mir-1306**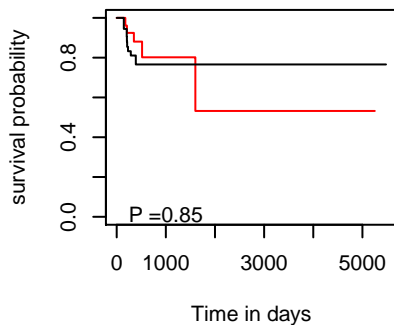**DSS hsa-mir-1306**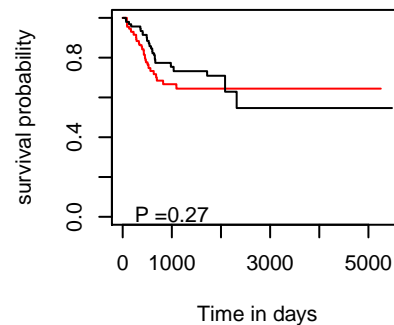

**OS hsa-mir-7-3**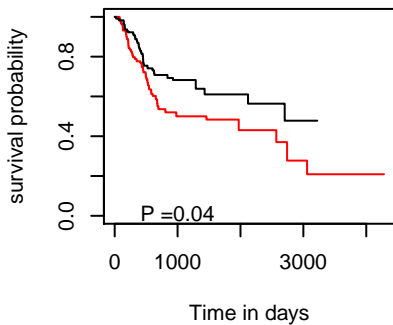**PFI hsa-mir-7-3**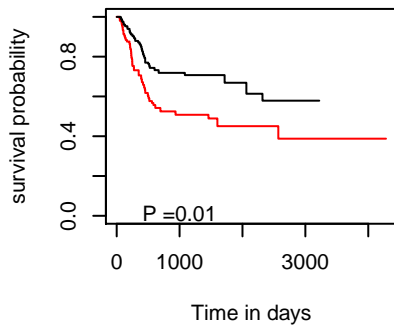**DFI hsa-mir-7-3**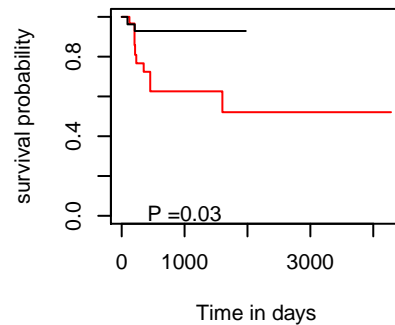**DSS hsa-mir-7-3**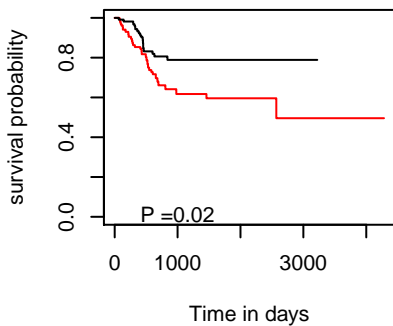**OS hsa-mir-1305**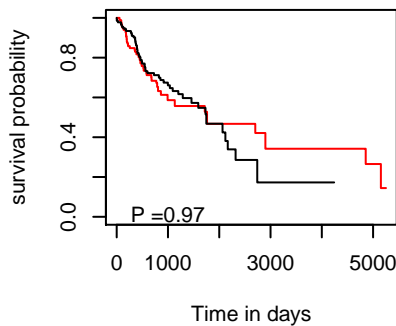**PFI hsa-mir-1305**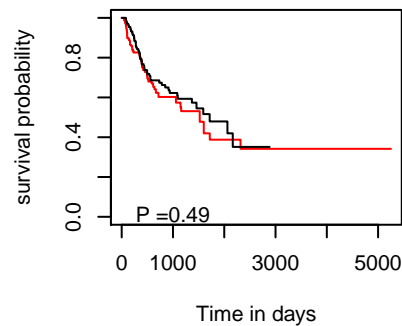**DFI hsa-mir-1305**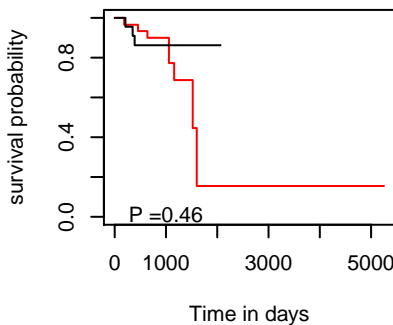**DSS hsa-mir-1305**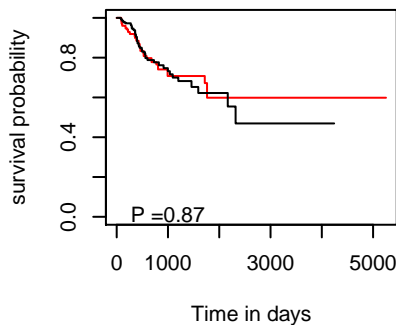**OS hsa-mir-3187**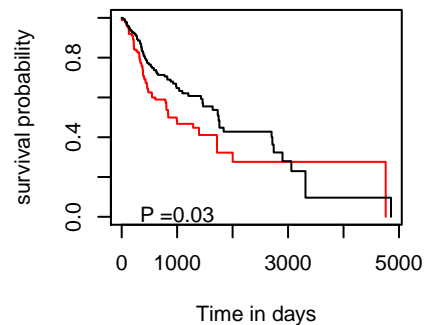

**PFI hsa-mir-3187**

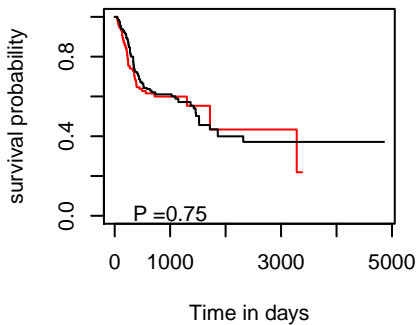

**DFI hsa-mir-3187**

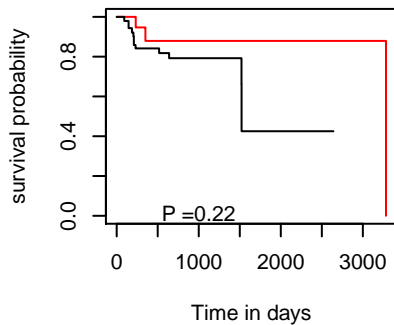

**DSS hsa-mir-3187**

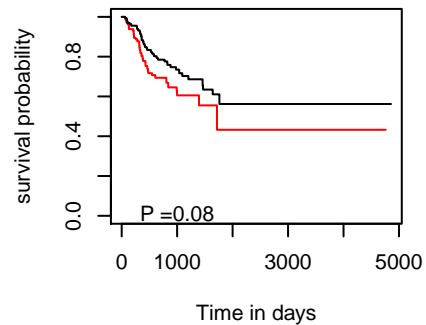

Supplement: MOESM16 [file 41598_2022_7628_MOESM16_ESM.pdf]
