# Supplementary material for: New Thinking on Read-Aloud.
Source: Springer Nature journal article supplement (doi:10.1038/s41598-022-07628-z), 2001-01-01

# Computing microRNA-gene interaction networks in pan-cancer using miRDriver

Banabithi Bose, Matthew Moravec, and Serdar Bozdag

# Supplemental Figure S8

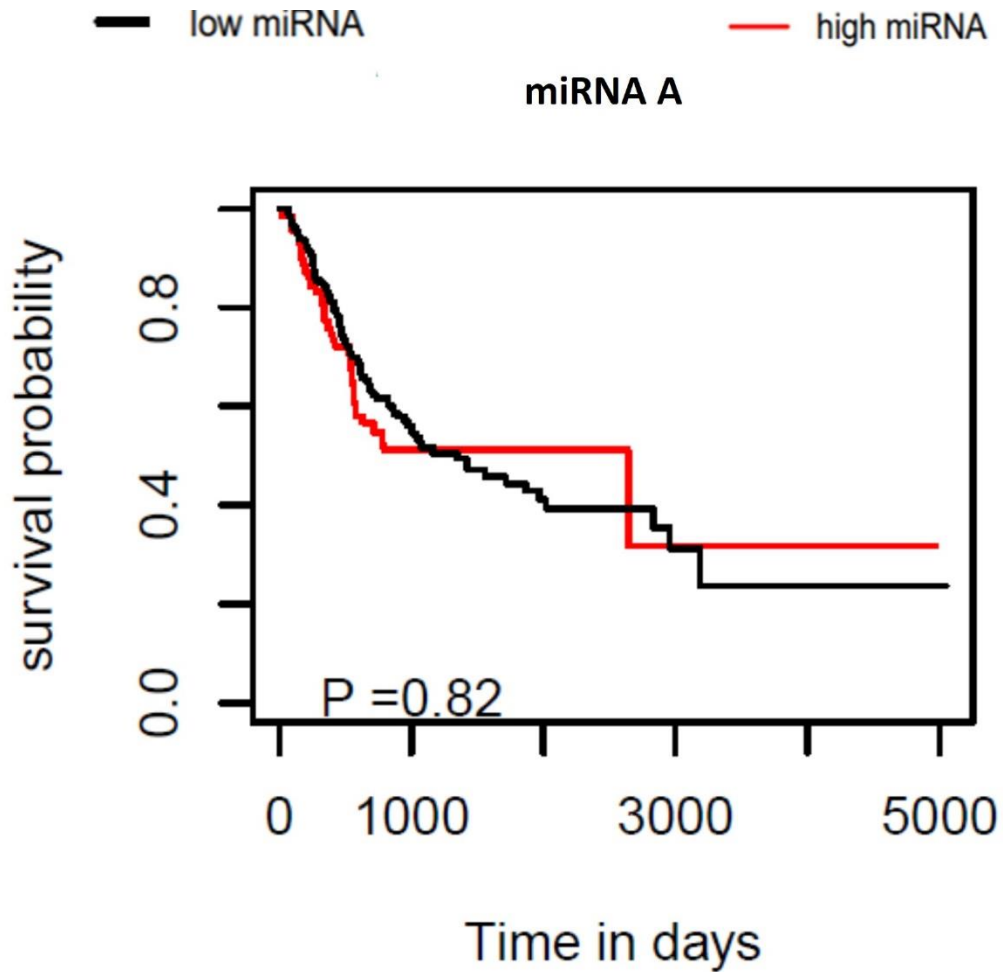

The *Adjusted Kaplan-Meier* survival plots for the computed miRNAs in high and low miRNA expression patient groups.

## Supplemental Figure S8

## Cancer Type: KIRC

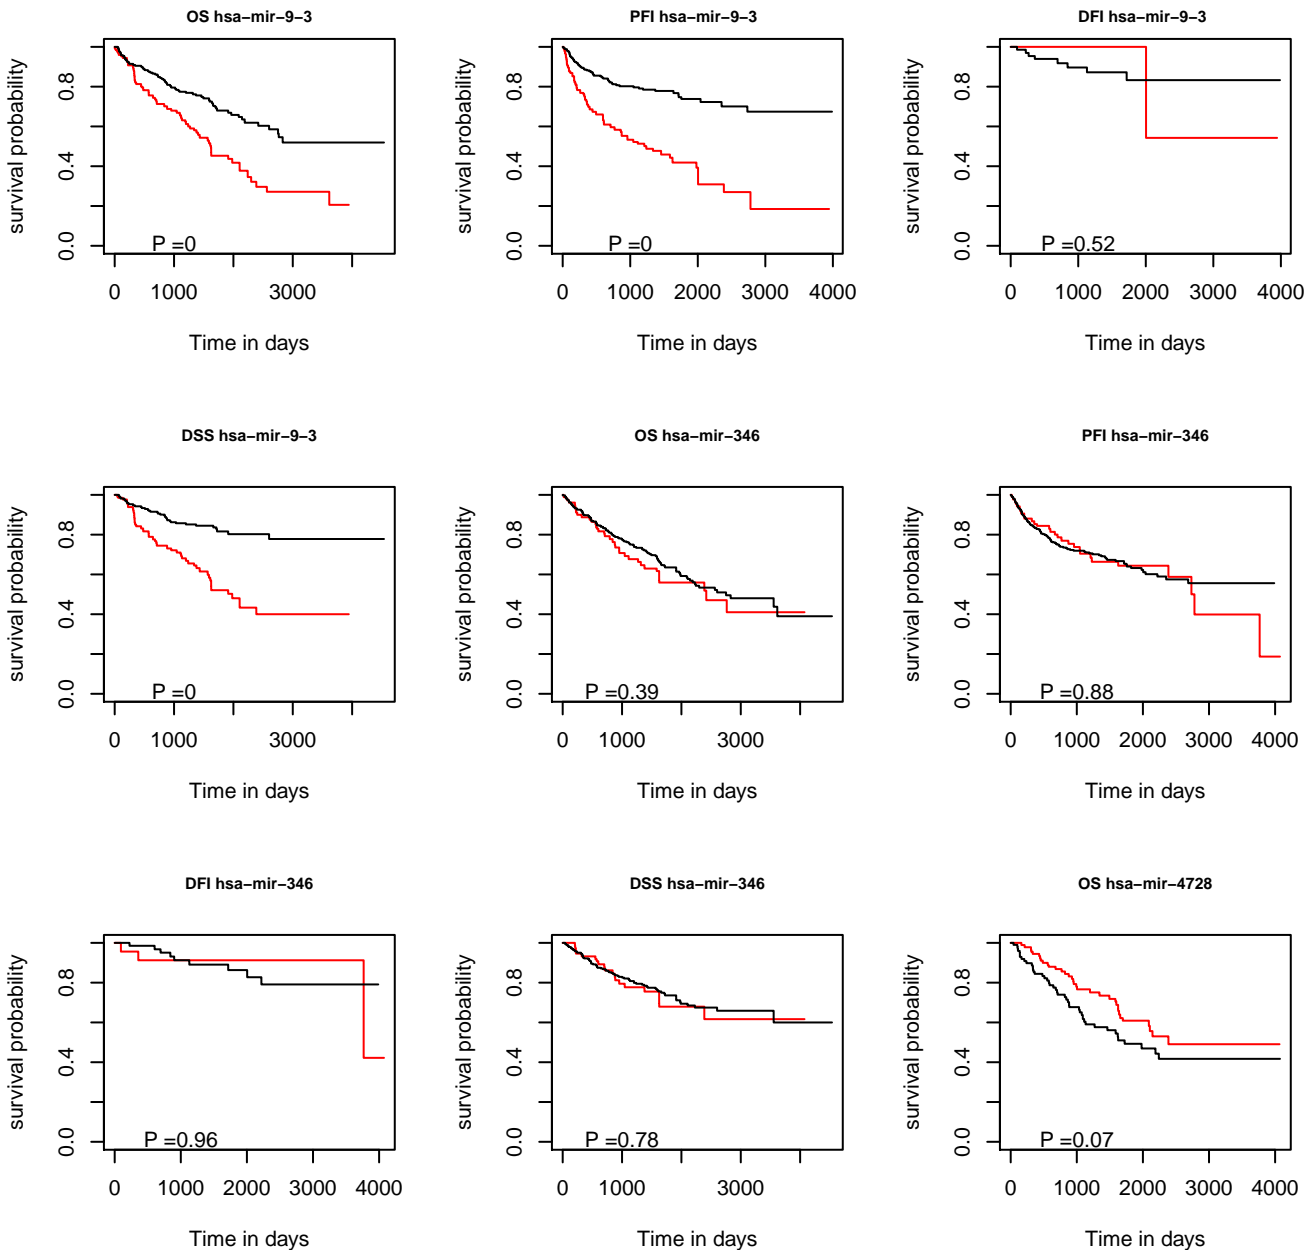

**PFI hsa-mir-4728**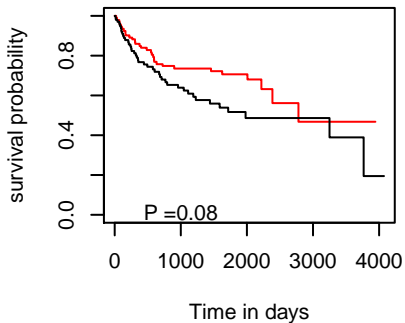**DFI hsa-mir-4728**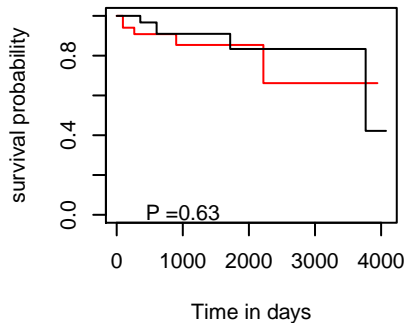**DSS hsa-mir-4728**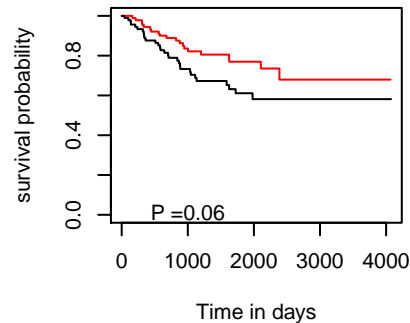**OS hsa-mir-31**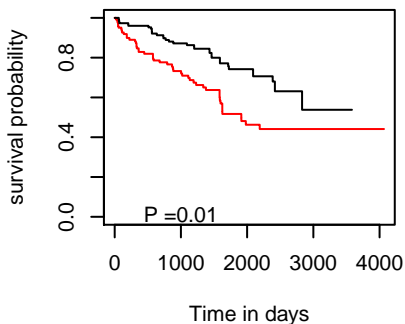**PFI hsa-mir-31**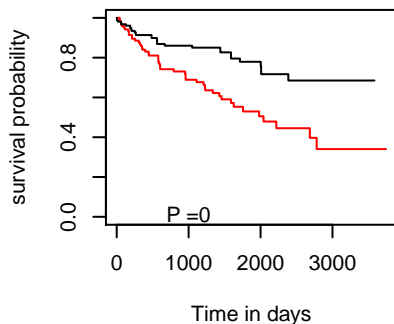**DFI hsa-mir-31**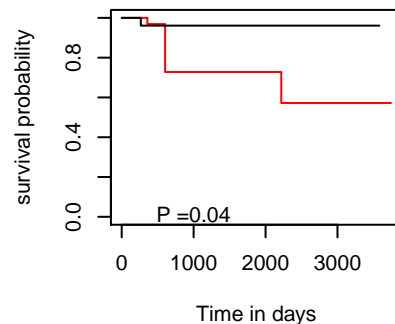**DSS hsa-mir-31**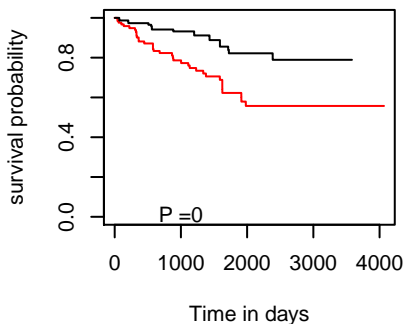**OS hsa-mir-5187**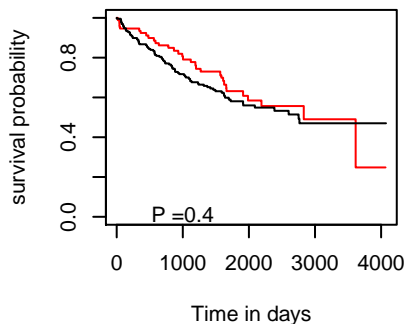**PFI hsa-mir-5187**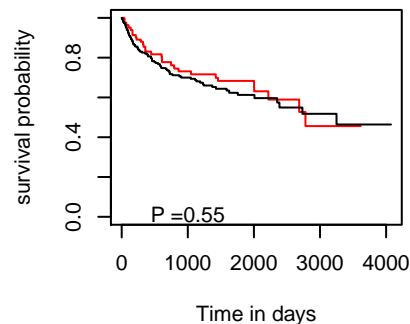

**DFI hsa-mir-5187**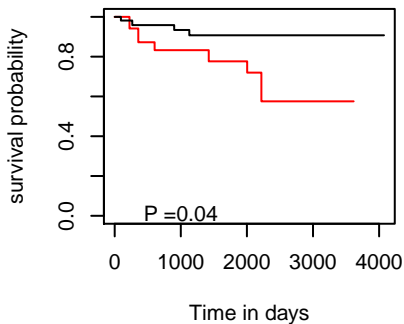**DSS hsa-mir-5187**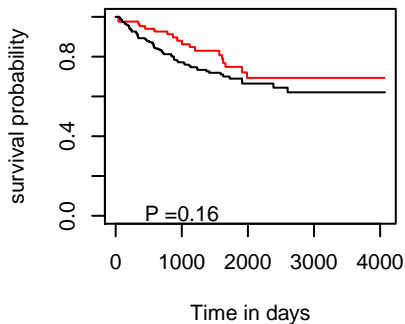**OS hsa-mir-765**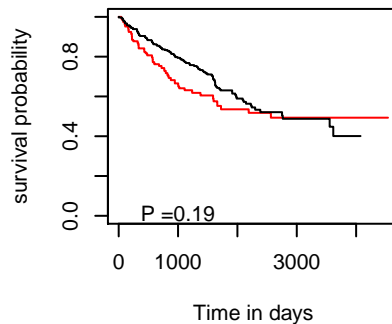**PFI hsa-mir-765**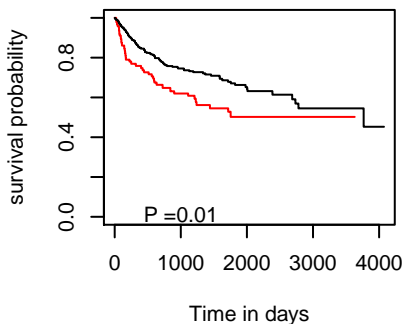**DFI hsa-mir-765**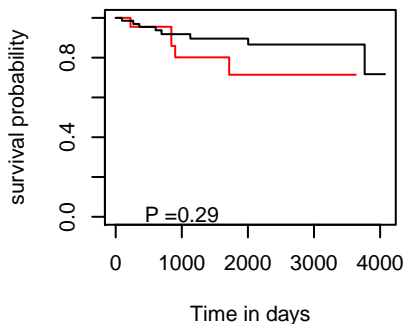**DSS hsa-mir-765**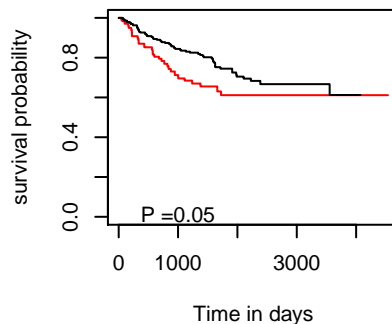**OS hsa-mir-551b**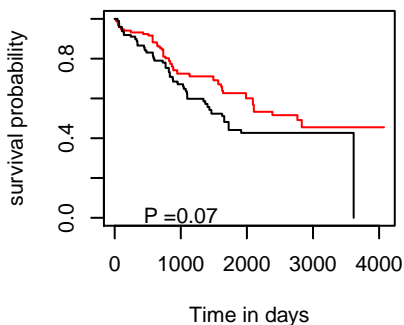**PFI hsa-mir-551b**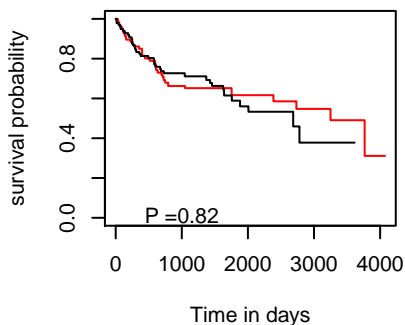**DFI hsa-mir-551b**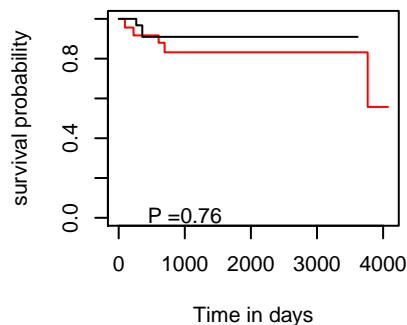

**DSS hsa-mir-551b**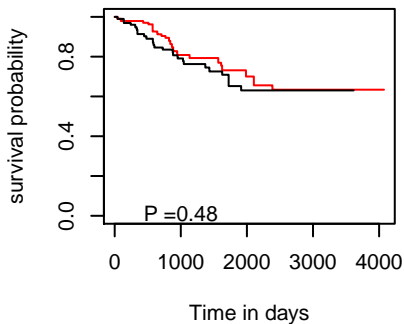**OS hsa-mir-2277**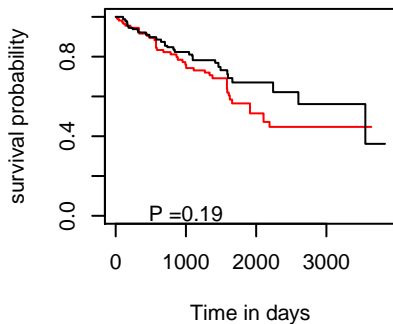**PFI hsa-mir-2277**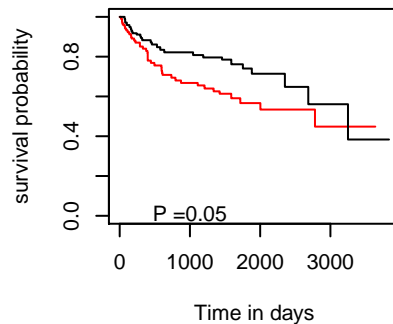**DFI hsa-mir-2277**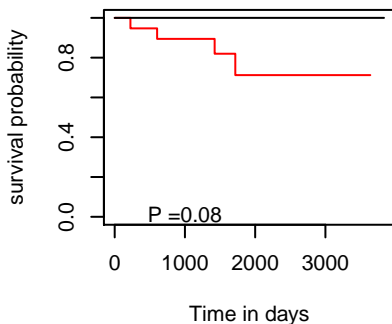**DSS hsa-mir-2277**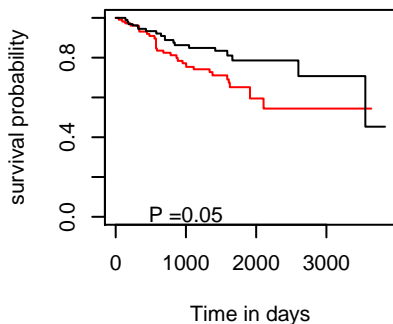**OS hsa-mir-4677**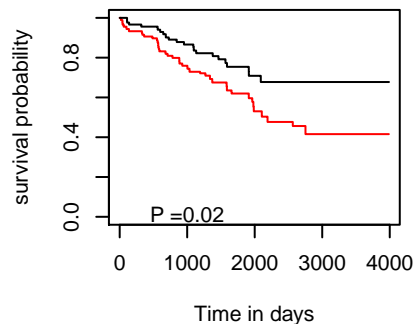**PFI hsa-mir-4677**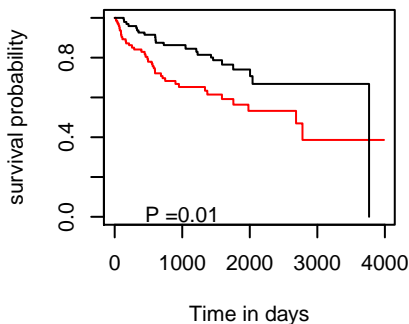**DFI hsa-mir-4677**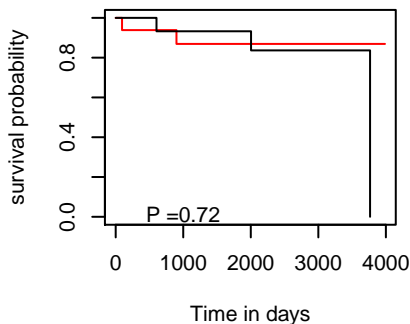**DSS hsa-mir-4677**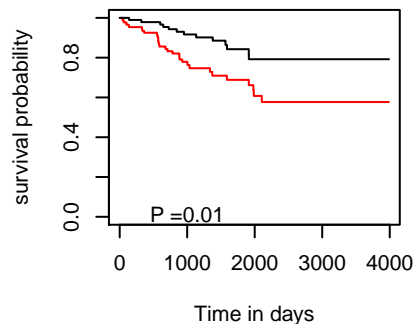



**PFI hsa-mir-149**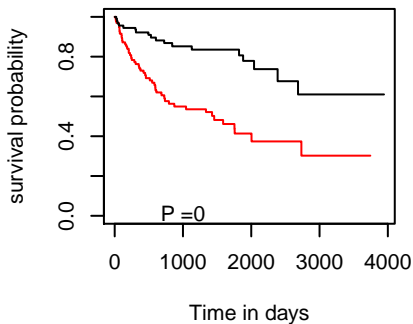**DFI hsa-mir-149**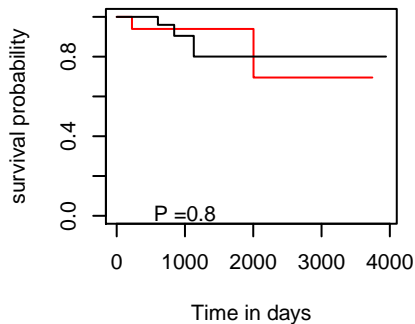**DSS hsa-mir-149**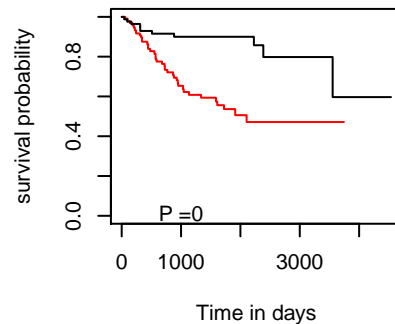**OS hsa-mir-5001**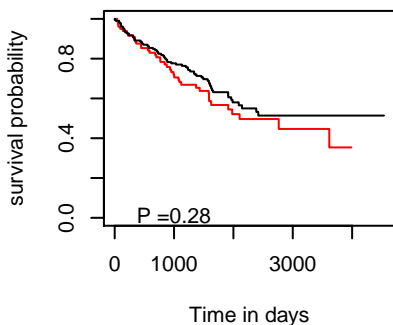**PFI hsa-mir-5001**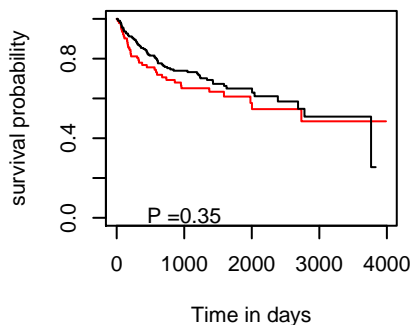**DFI hsa-mir-5001**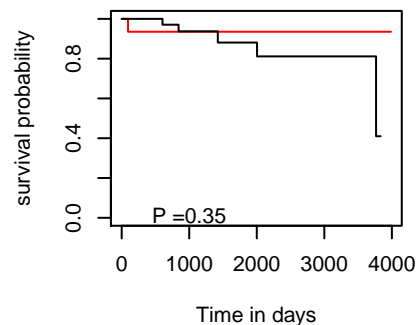**DSS hsa-mir-5001**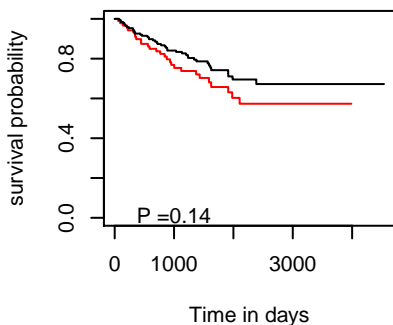**OS hsa-mir-190b**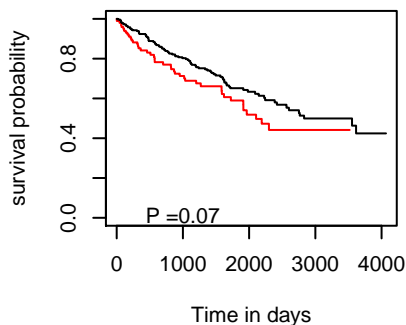**PFI hsa-mir-190b**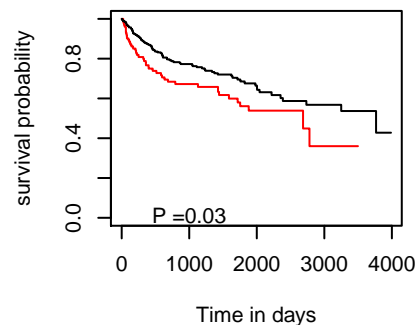

**DFI hsa-mir-190b**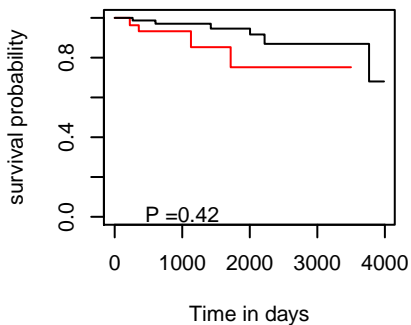**DSS hsa-mir-190b**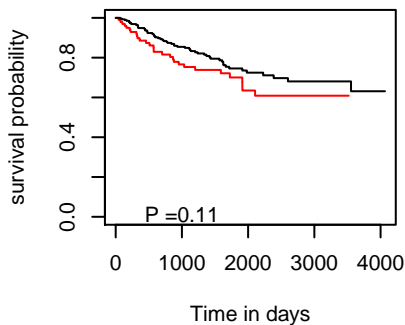**OS hsa-mir-1537**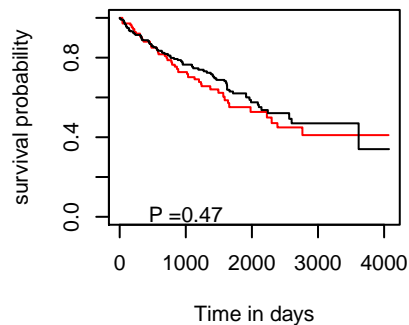**PFI hsa-mir-1537**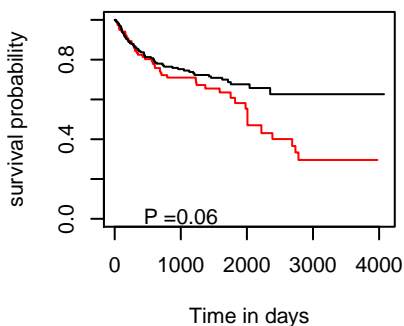**DFI hsa-mir-1537**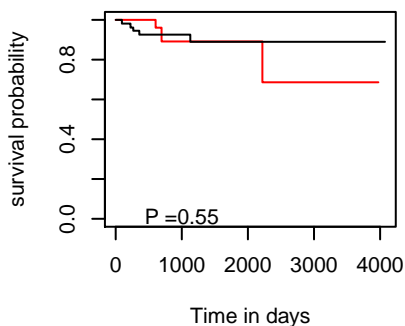**DSS hsa-mir-1537**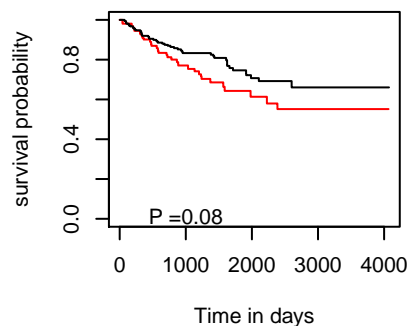**OS hsa-mir-215**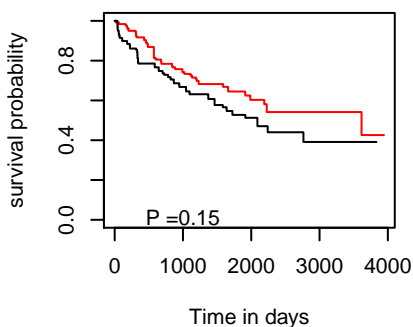**PFI hsa-mir-215**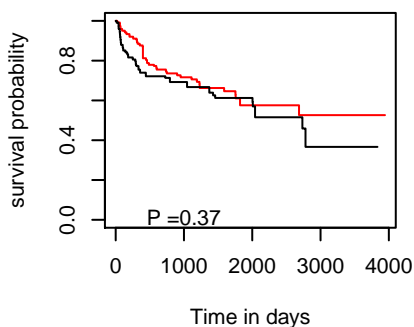**DFI hsa-mir-215**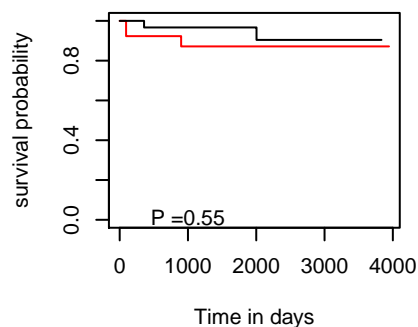

**DSS hsa-mir-215**

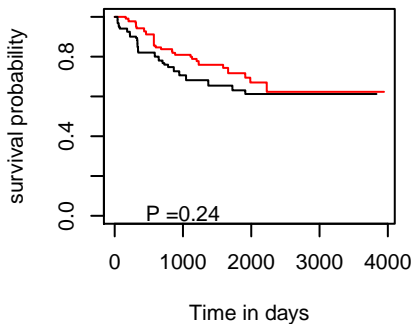

**OS hsa-mir-4709**

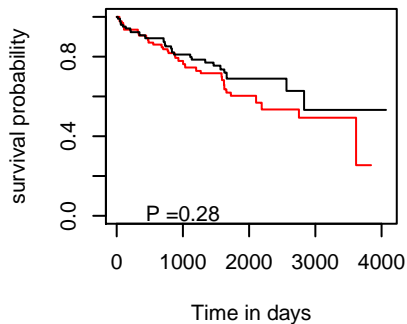

**PFI hsa-mir-4709**

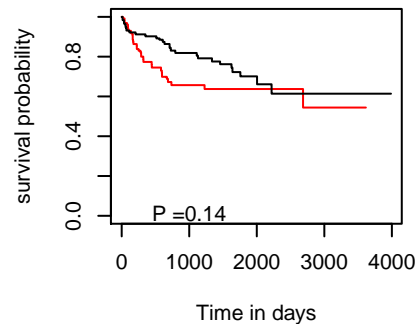

**DFI hsa-mir-4709**

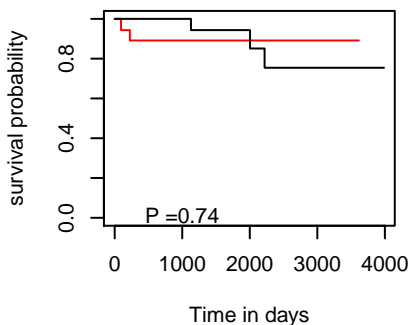

**DSS hsa-mir-4709**

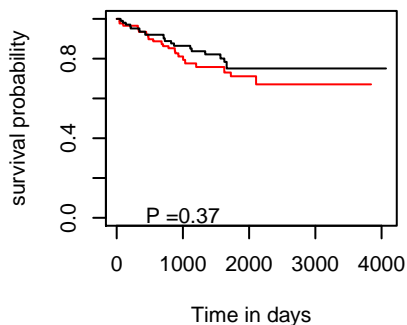

**OS hsa-mir-3130-1**

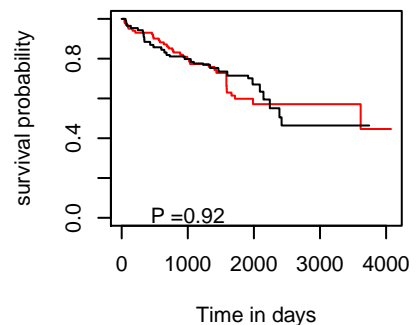

**PFI hsa-mir-3130-1**

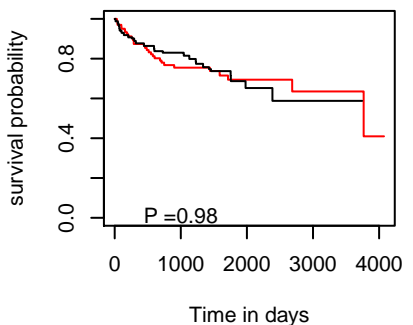

**DFI hsa-mir-3130-1**

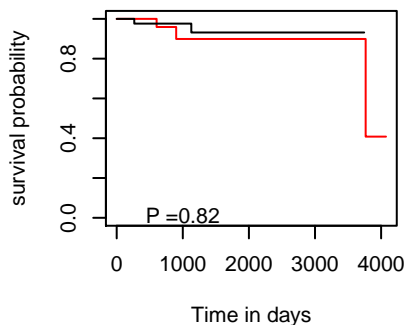

**DSS hsa-mir-3130-1**

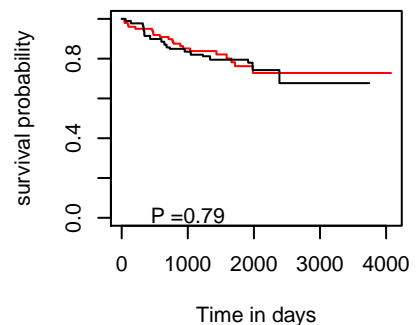

**OS hsa-mir-375**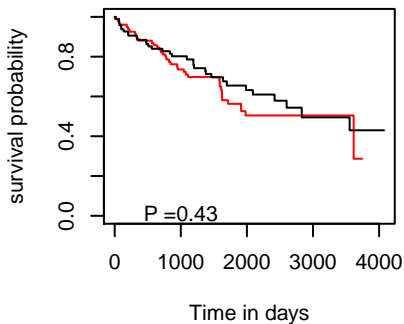**PFI hsa-mir-375**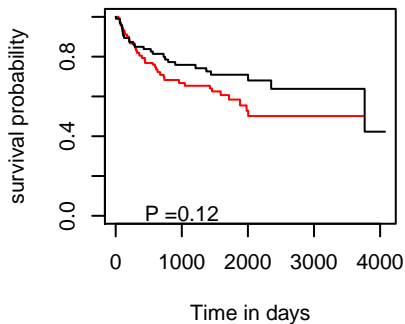**DFI hsa-mir-375**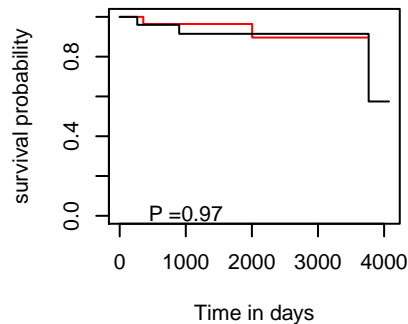**DSS hsa-mir-375**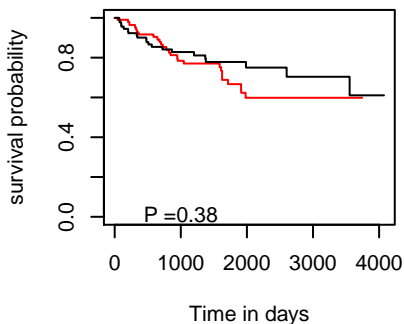**OS hsa-mir-4786**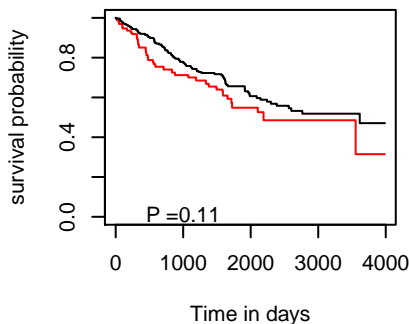**PFI hsa-mir-4786**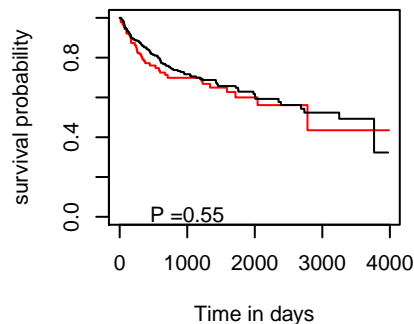**DFI hsa-mir-4786**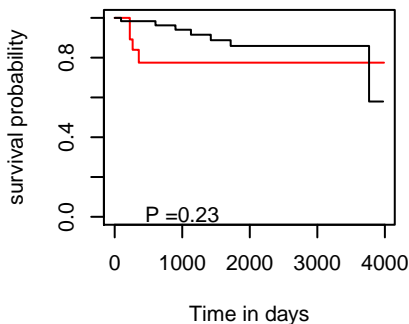**DSS hsa-mir-4786**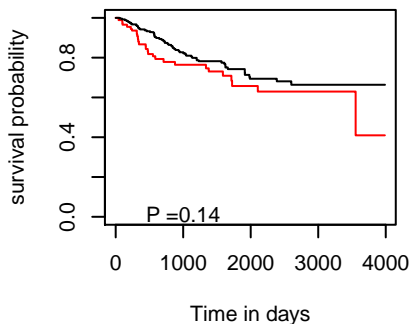**OS hsa-mir-194-1**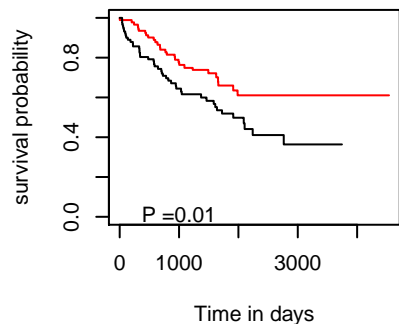

**PFI hsa-mir-194-1**

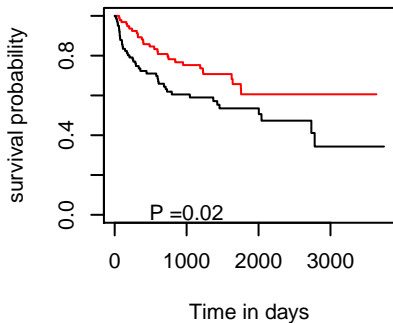

**DFI hsa-mir-194-1**

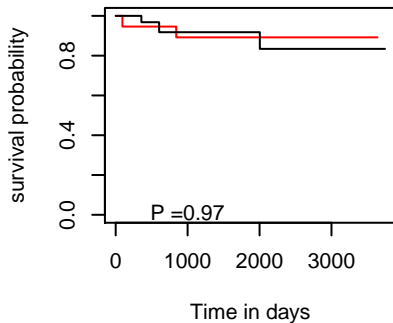

**DSS hsa-mir-194-1**

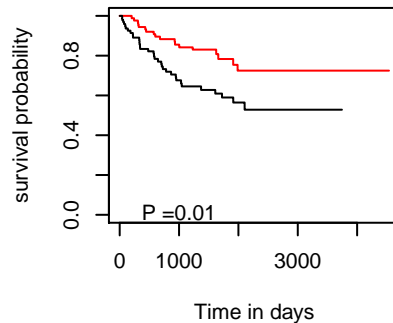

**OS hsa-mir-153-1**

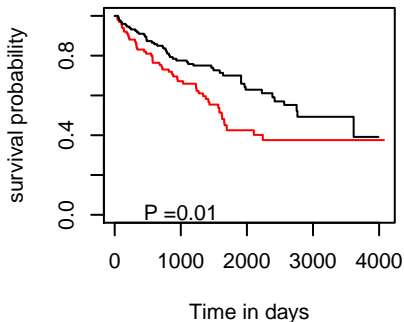

**PFI hsa-mir-153-1**

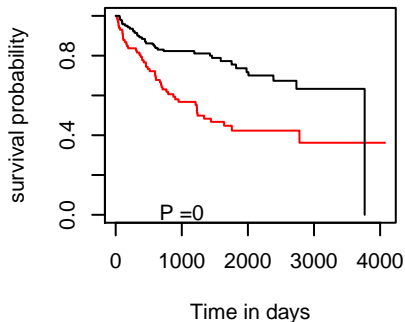

**DFI hsa-mir-153-1**

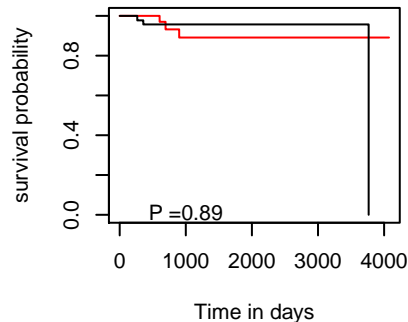

**DSS hsa-mir-153-1**

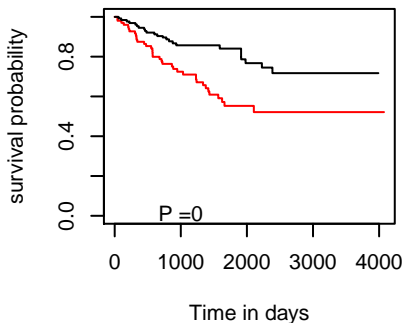

**OS hsa-mir-3131**

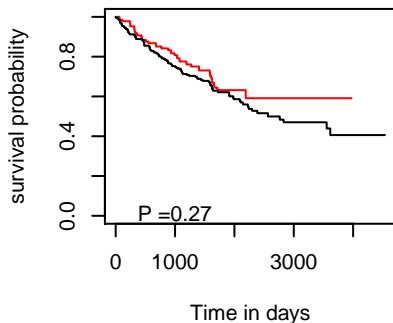

**PFI hsa-mir-3131**

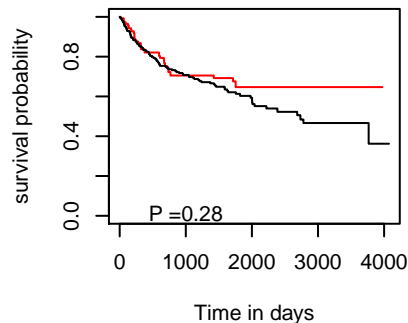

**DFI hsa-mir-3131**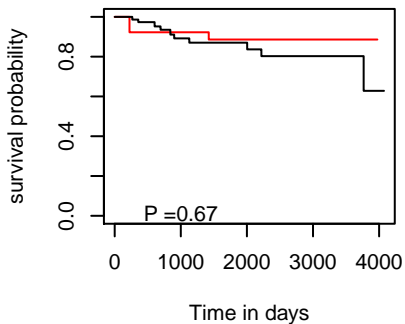**DSS hsa-mir-3131**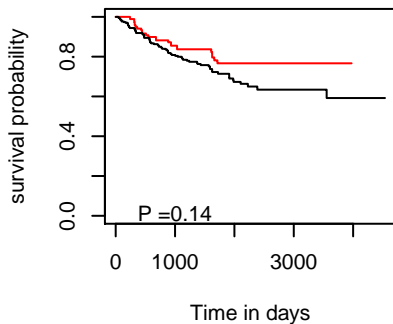**OS hsa-mir-92b**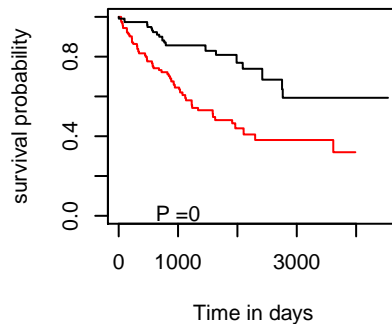**PFI hsa-mir-92b**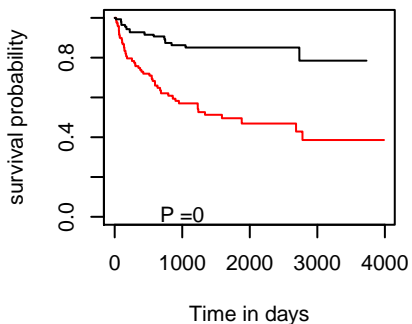**DFI hsa-mir-92b**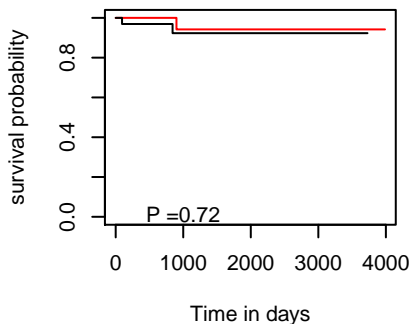**DSS hsa-mir-92b**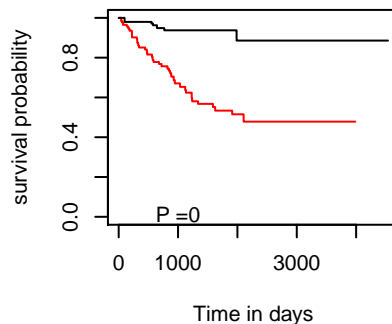**OS hsa-mir-26b**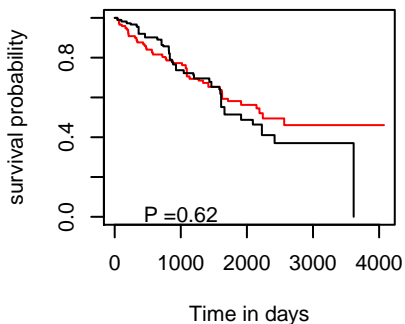**PFI hsa-mir-26b**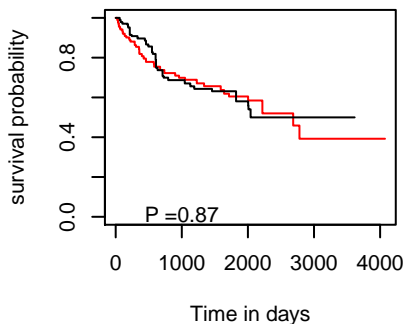**DFI hsa-mir-26b**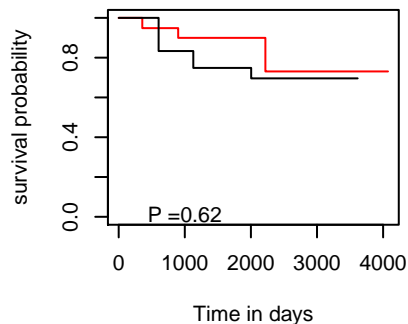

**DSS hsa-mir-26b**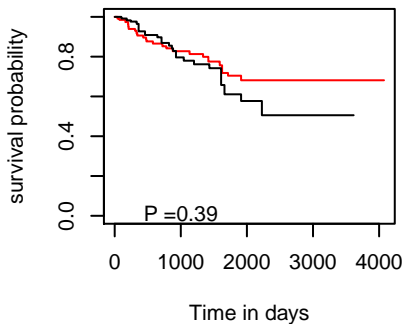**OS hsa-mir-2355**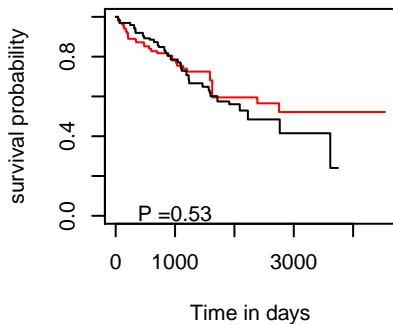**PFI hsa-mir-2355**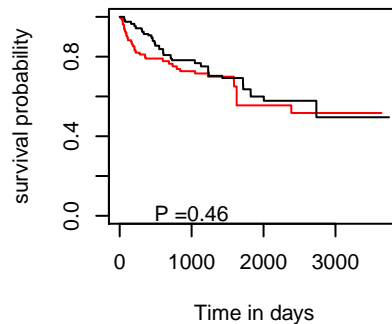**DFI hsa-mir-2355**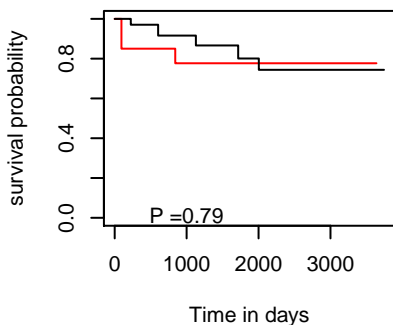**DSS hsa-mir-2355**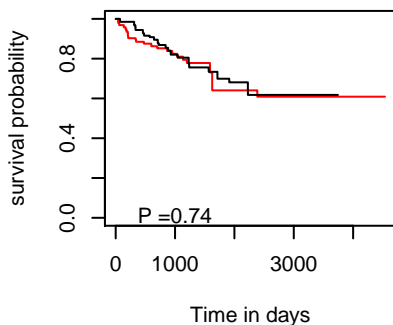**OS hsa-mir-664a**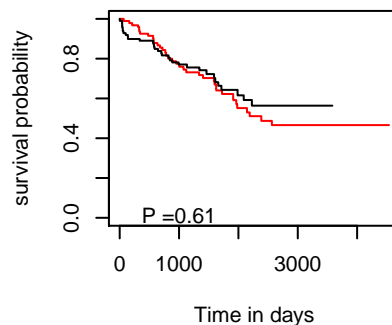**PFI hsa-mir-664a**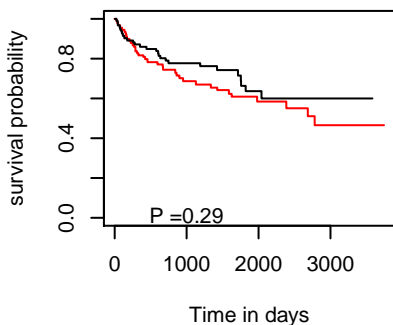**DFI hsa-mir-664a**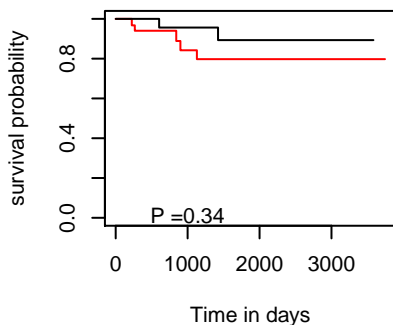**DSS hsa-mir-664a**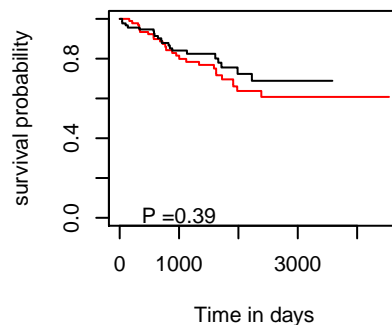

**OS hsa-mir-4777**

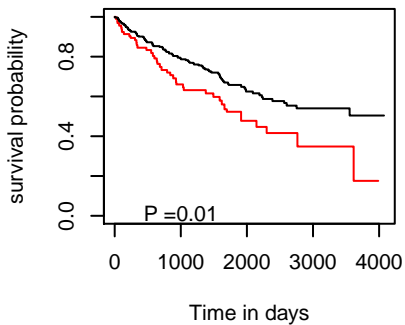

**PFI hsa-mir-4777**

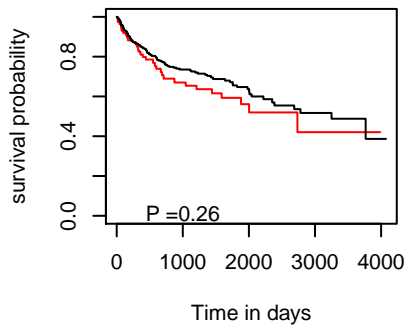

**DFI hsa-mir-4777**

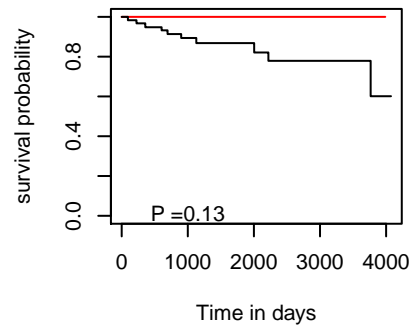

**DSS hsa-mir-4777**

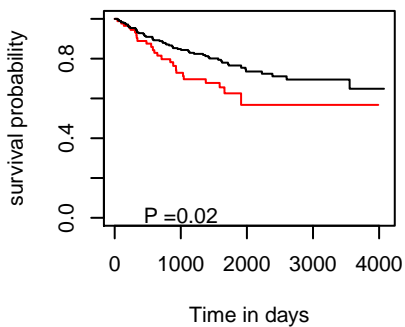

Supplement: MOESM17 [file 41598_2022_7628_MOESM17_ESM.pdf]
