# Supplementary material for: New Thinking on Read-Aloud.
Source: Springer Nature journal article supplement (doi:10.1038/s41598-022-07628-z), 2001-01-01

# Computing microRNA-gene interaction networks in pan-cancer using miRDriver

Banabithi Bose, Matthew Moravec, and Serdar Bozdog

# Supplemental Figure S9

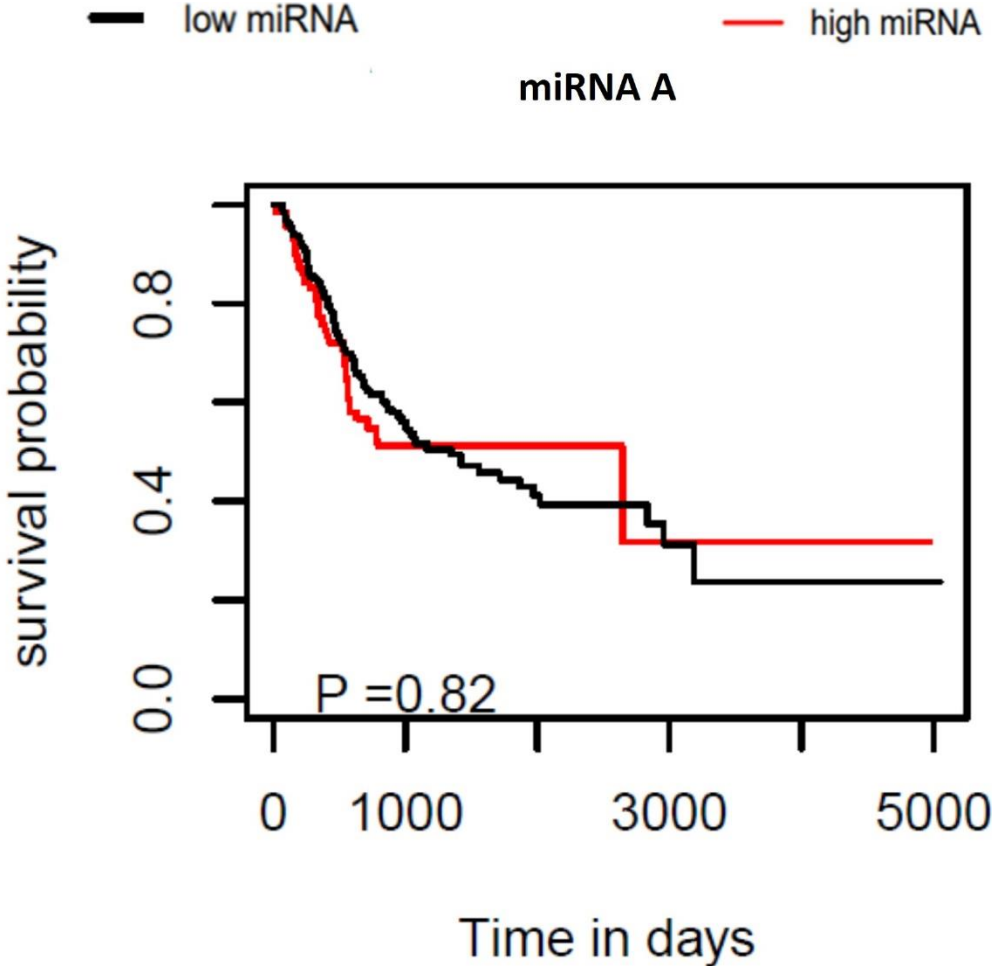

The *Adjusted Kaplan-Meier* survival plots for the computed miRNAs in high and low miRNA expression patient groups.

# Supplemental Figure S9

## Cancer Type: LAML

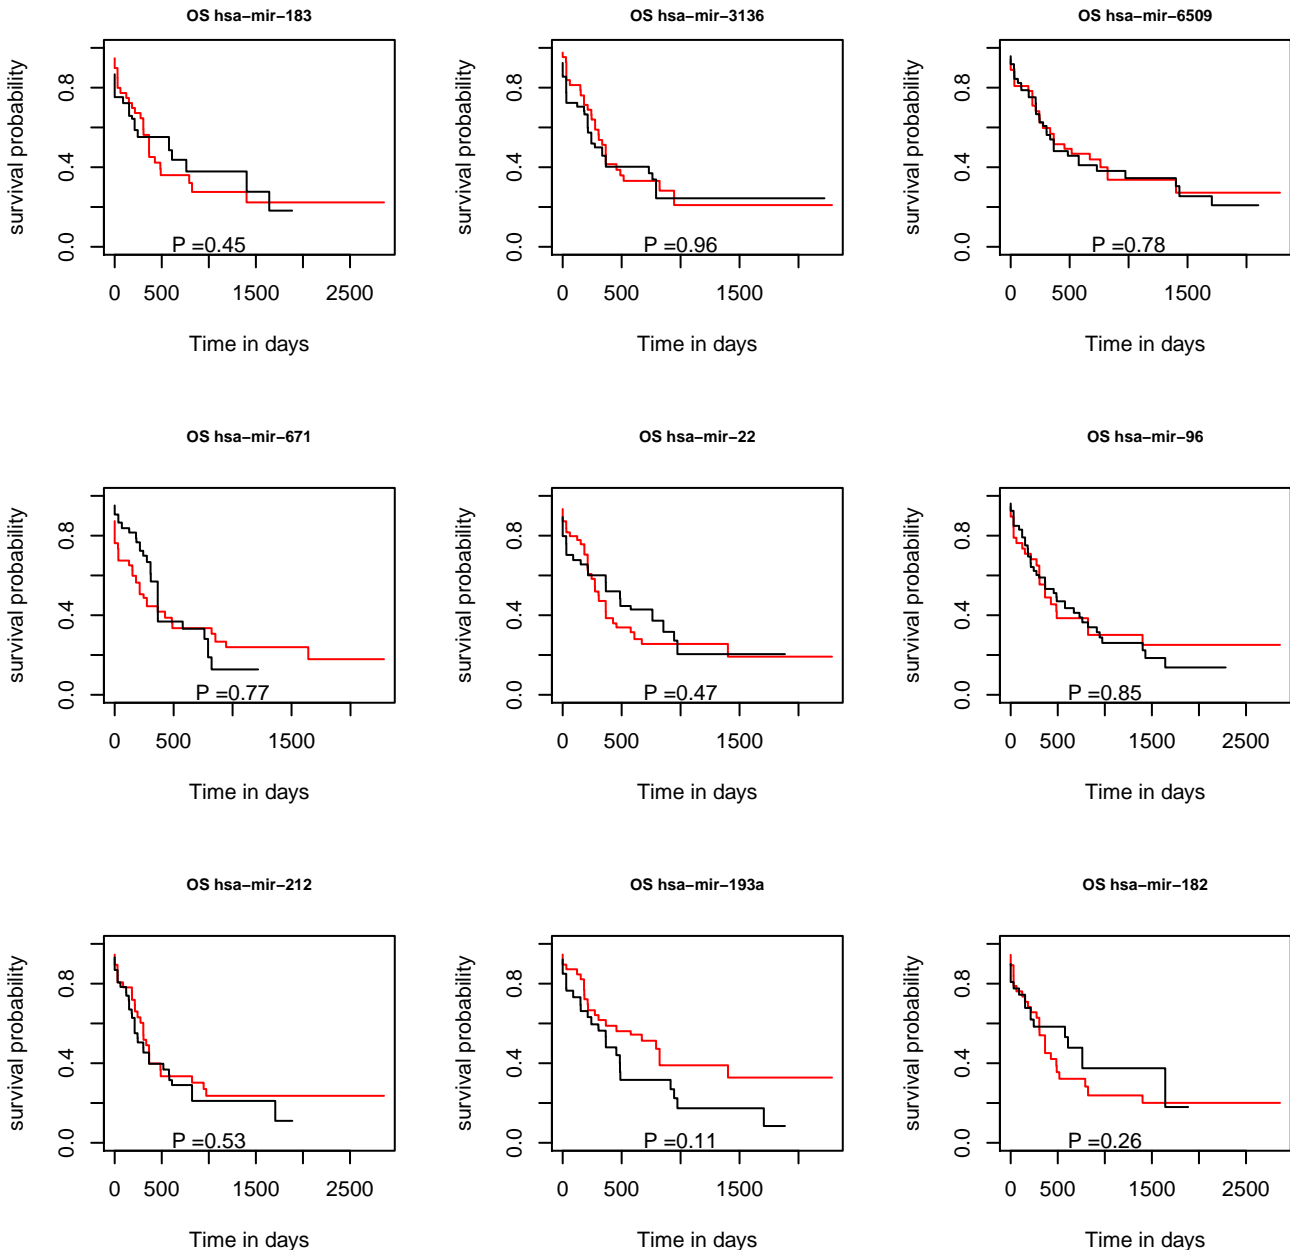

**OS hsa-mir-1284**

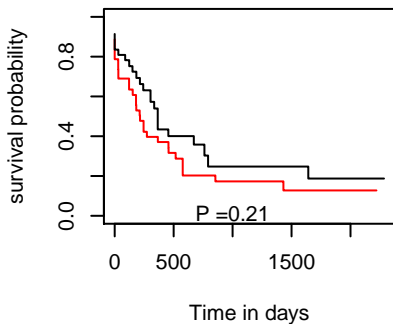

**OS hsa-mir-29b-1**

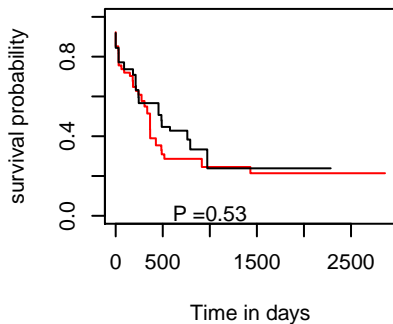

**OS hsa-mir-365b**

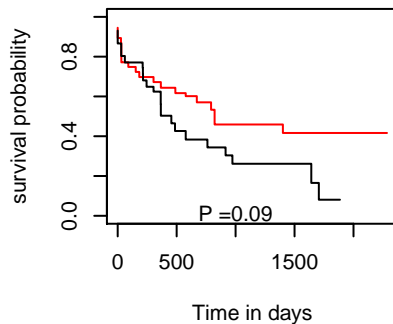

**OS hsa-mir-129-1**

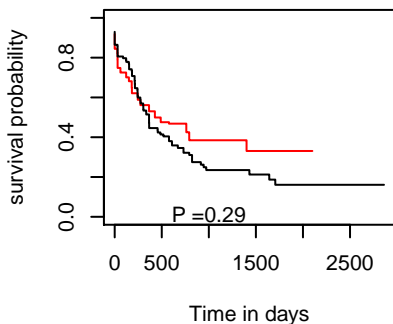

**OS hsa-mir-632**

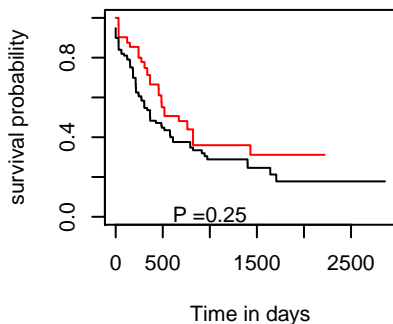

**OS hsa-mir-4724**

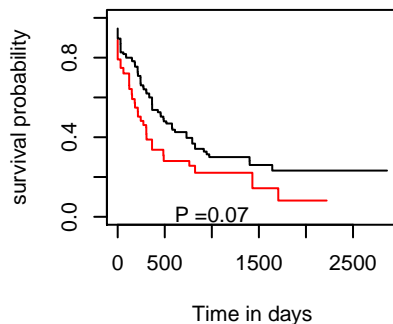

**OS hsa-mir-29a**

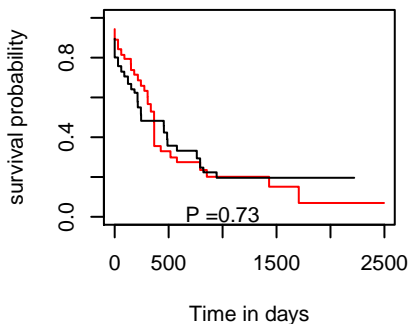

**OS hsa-mir-153-2**

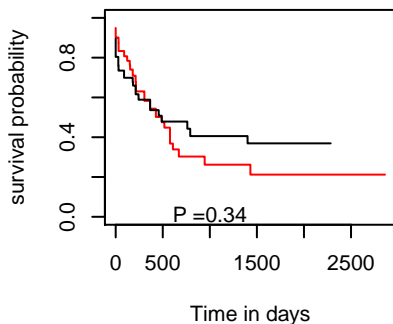

**OS hsa-mir-3654**

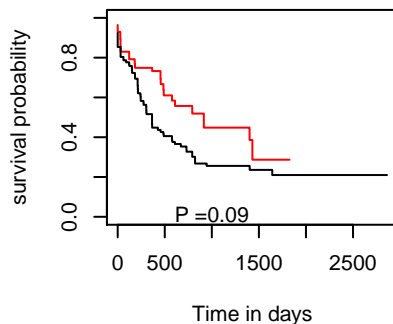

OS hsa-mir-6892

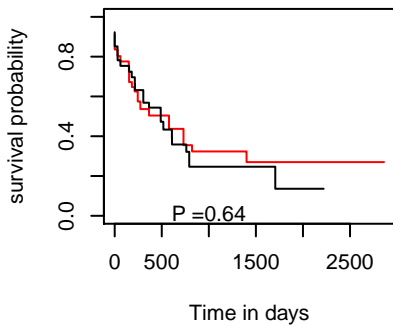

OS hsa-mir-132

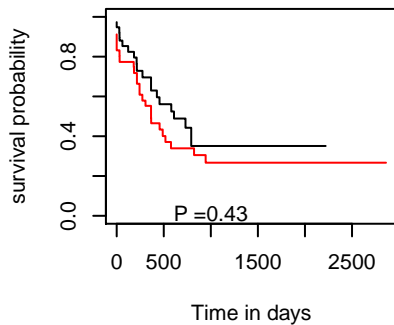

OS hsa-mir-335

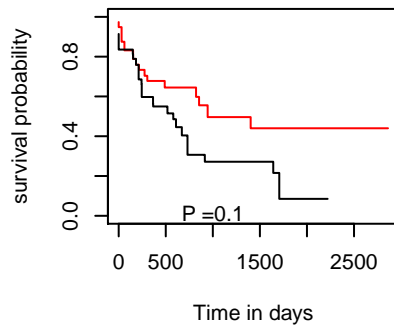

Supplement: MOESM18 [file 41598_2022_7628_MOESM18_ESM.pdf]
