# Supplementary material for: New Thinking on Read-Aloud.
Source: Springer Nature journal article supplement (doi:10.1038/s41598-022-07628-z), 2001-01-01

# Computing microRNA-gene interaction networks in pan-cancer using miRDriver

Banabithi Bose, Matthew Moravec, and Serdar Bozdog

# Supplemental Figure S10

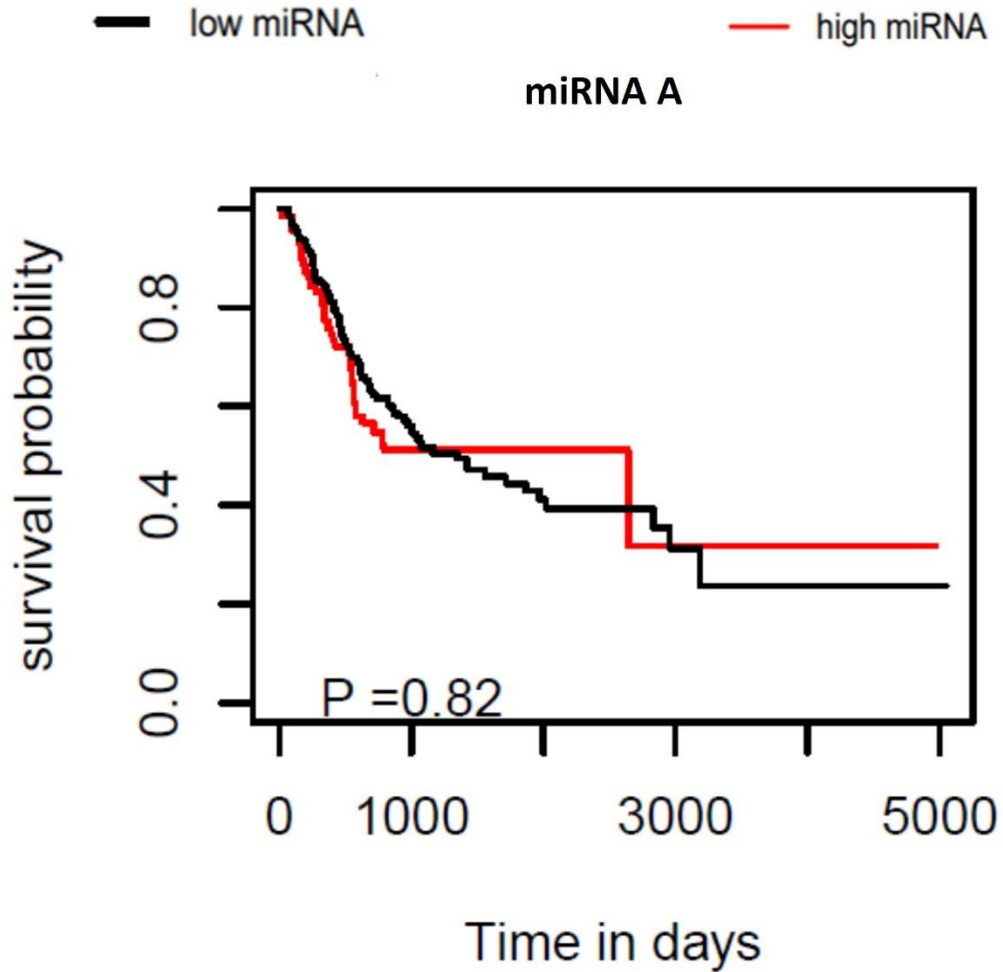

The *Adjusted Kaplan-Meier* survival plots for the computed miRNAs in high and low miRNA expression patient groups.

# Supplemental Figure S10

## Cancer Type: LGG

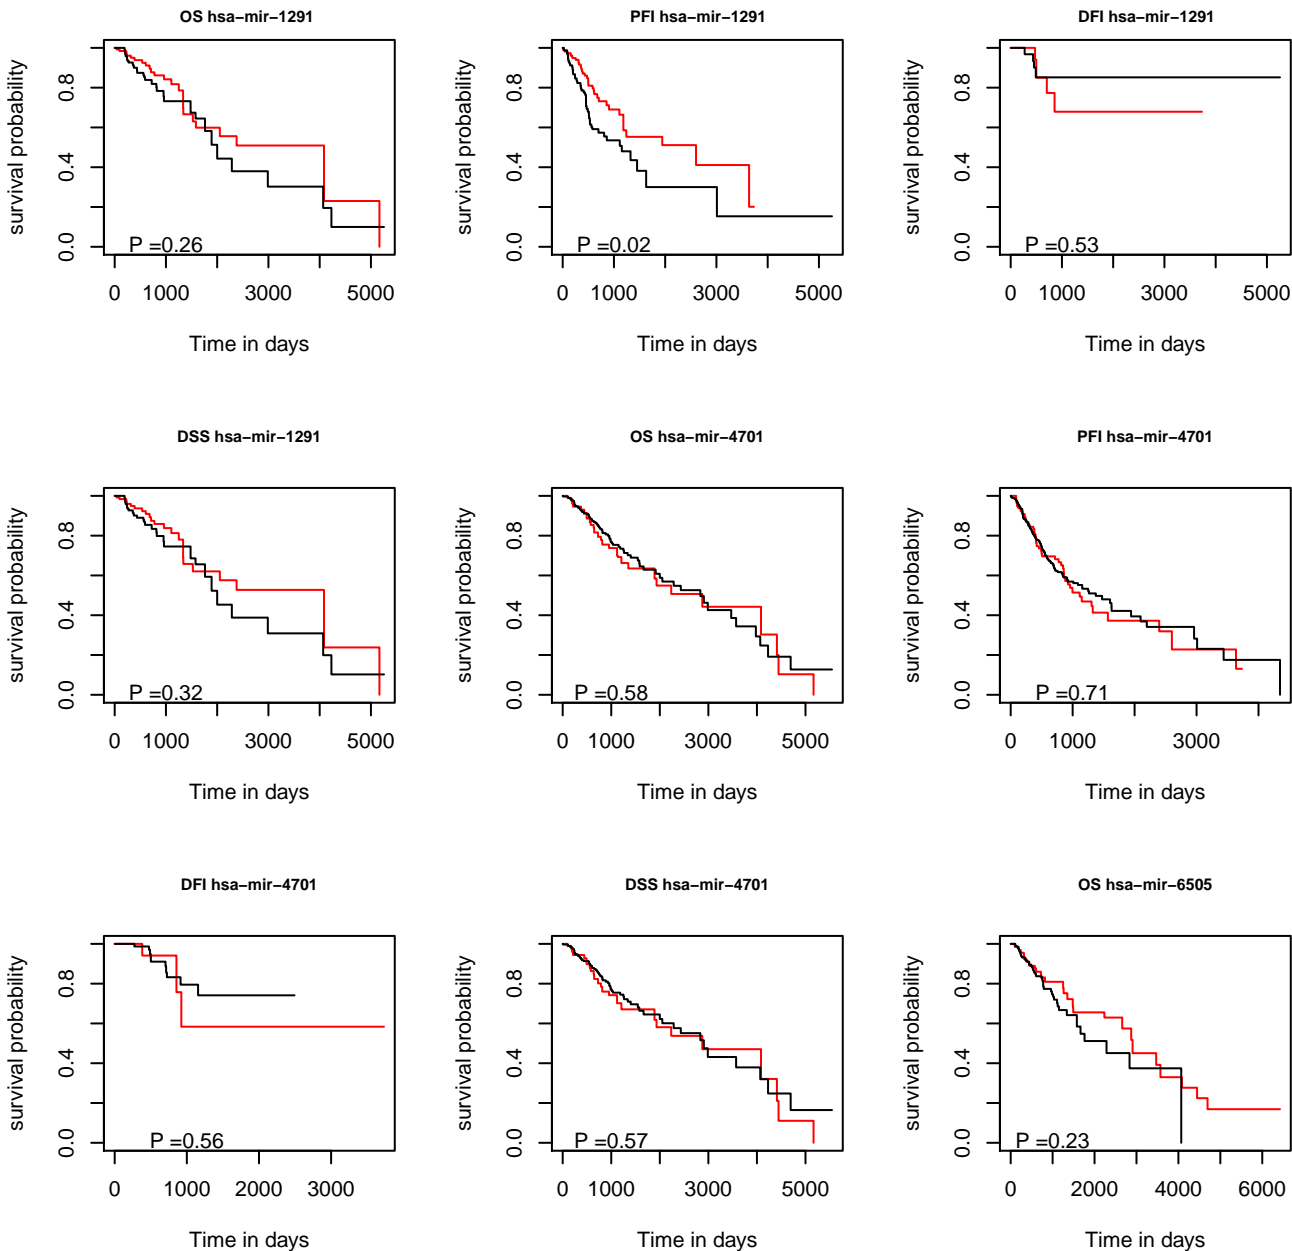

**PFI hsa-mir-6505**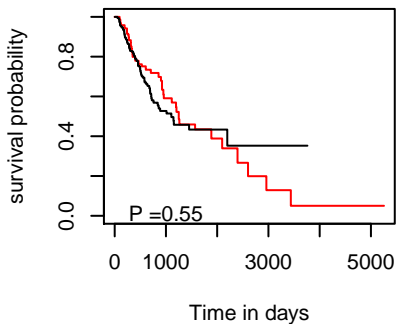**DFI hsa-mir-6505**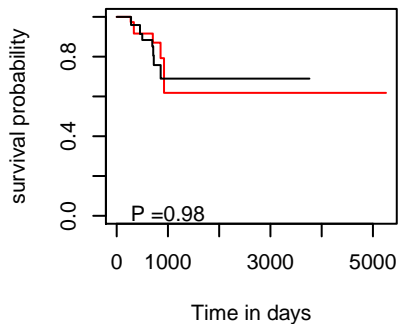**DSS hsa-mir-6505**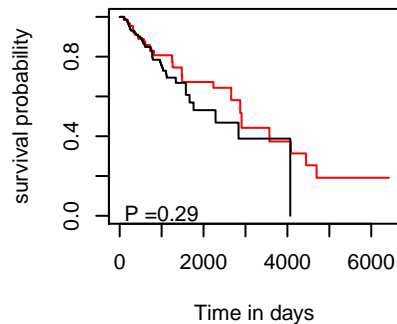**OS hsa-mir-1224**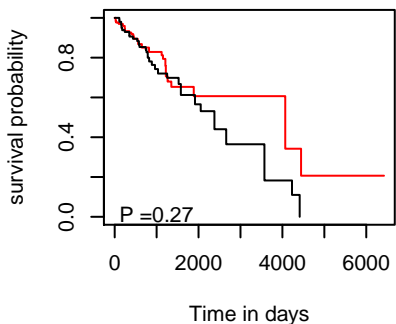**PFI hsa-mir-1224**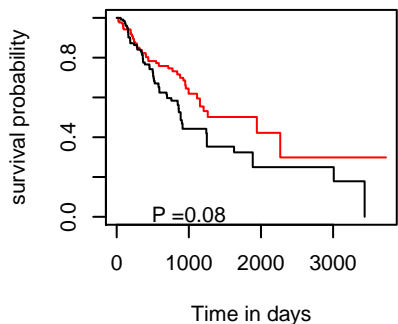**DFI hsa-mir-1224**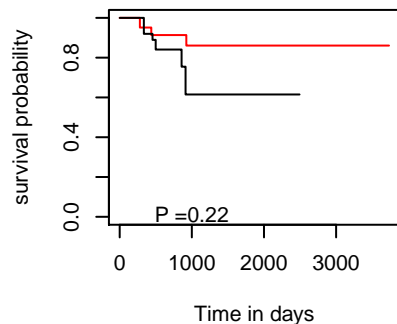**DSS hsa-mir-1224**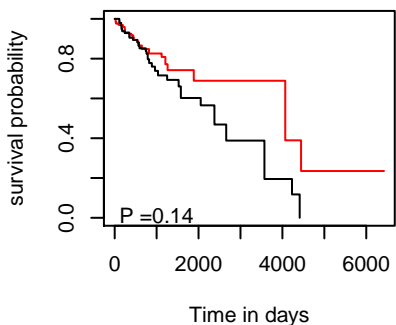**OS hsa-mir-1228**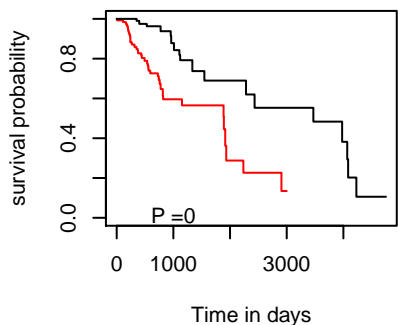**PFI hsa-mir-1228**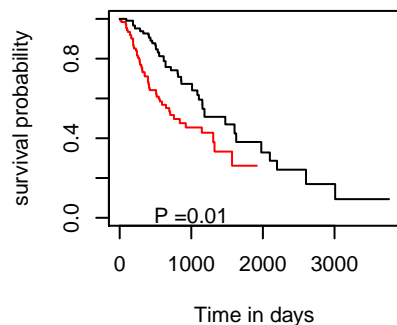

**DFI hsa-mir-1228**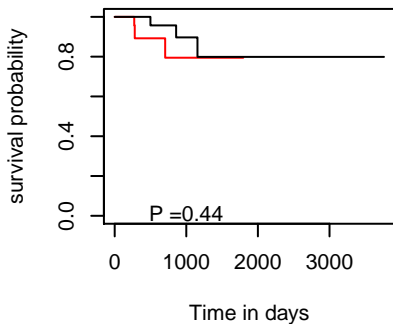**DSS hsa-mir-1228**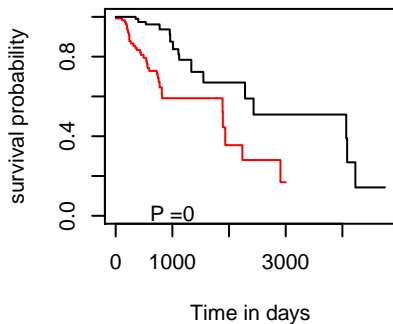**OS hsa-mir-135a-1**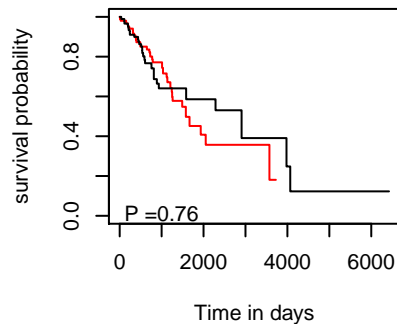**PFI hsa-mir-135a-1**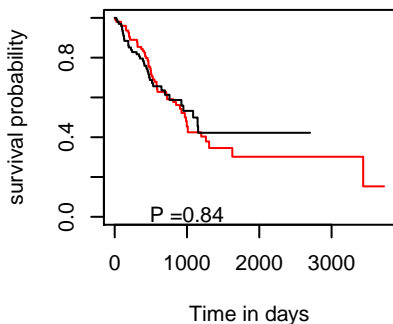**DFI hsa-mir-135a-1**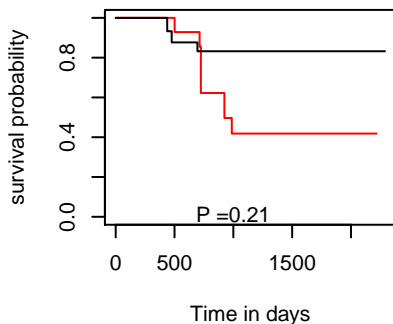**DSS hsa-mir-135a-1**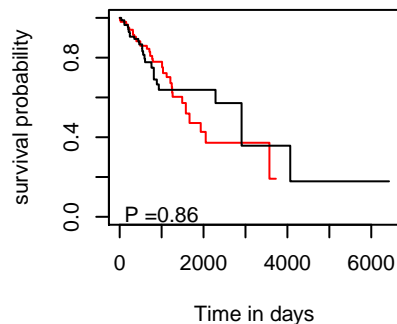**OS hsa-mir-944**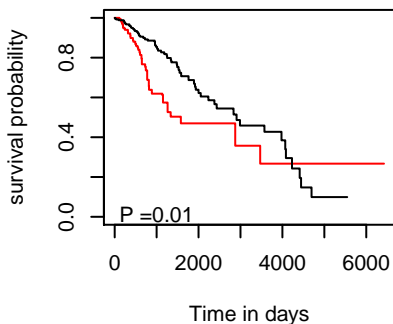**PFI hsa-mir-944**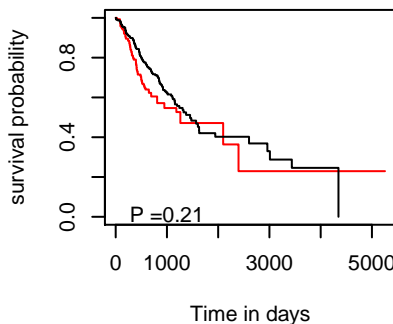**DFI hsa-mir-944**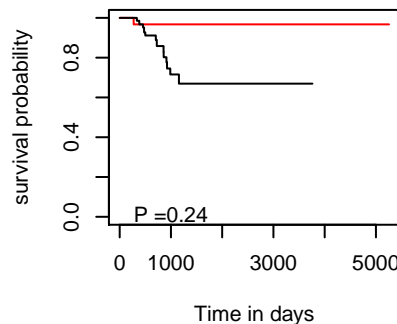

**DSS hsa-mir-944**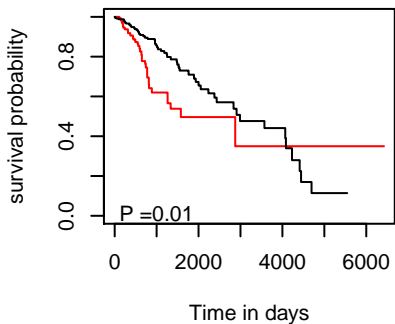**OS hsa-mir-6720**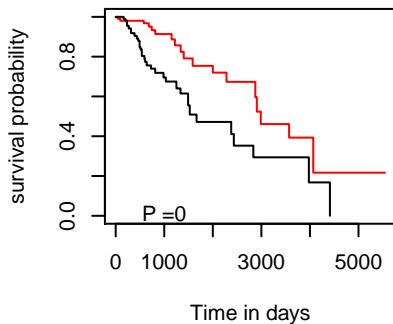**PFI hsa-mir-6720**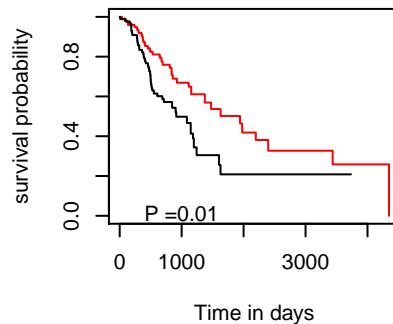**DFI hsa-mir-6720**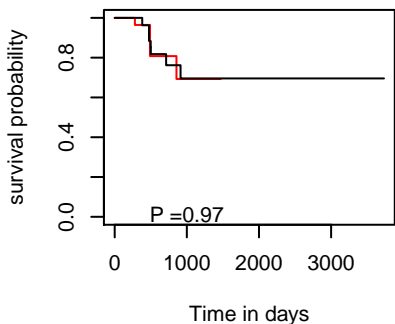**DSS hsa-mir-6720**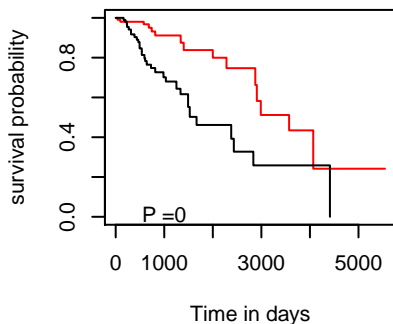**OS hsa-mir-3678**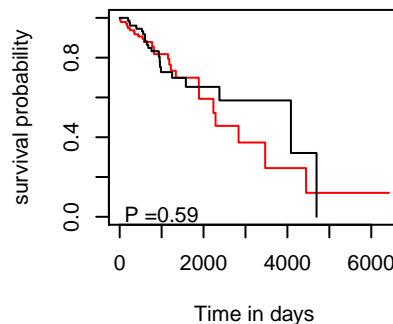**PFI hsa-mir-3678**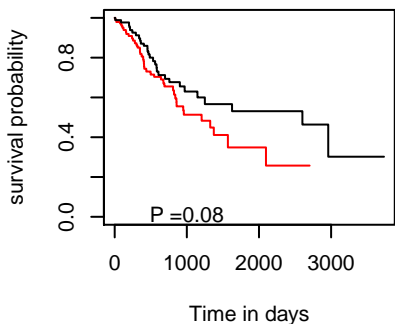**DFI hsa-mir-3678**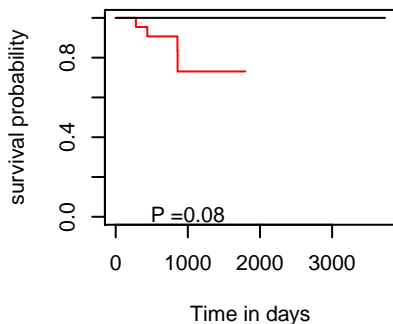**DSS hsa-mir-3678**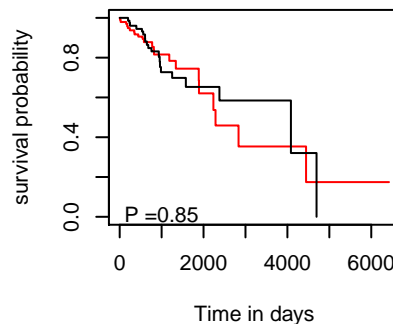

**OS hsa-mir-33a**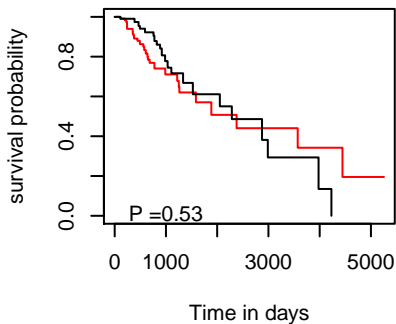**PFI hsa-mir-33a**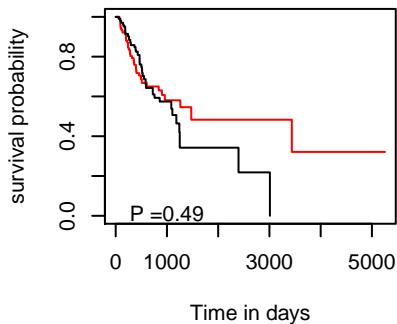**DFI hsa-mir-33a**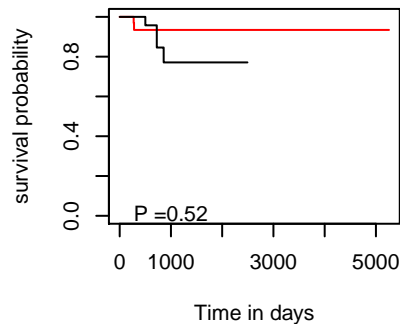**DSS hsa-mir-33a**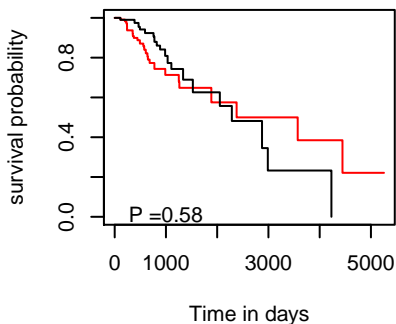**OS hsa-mir-425**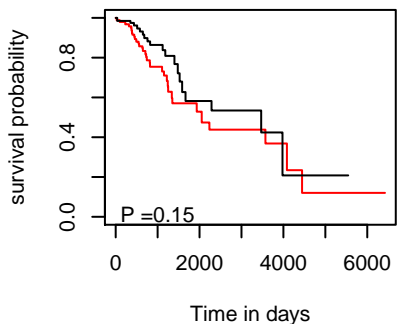**PFI hsa-mir-425**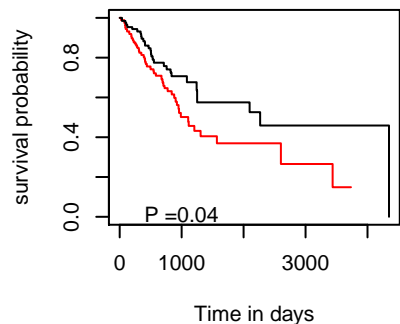**DFI hsa-mir-425**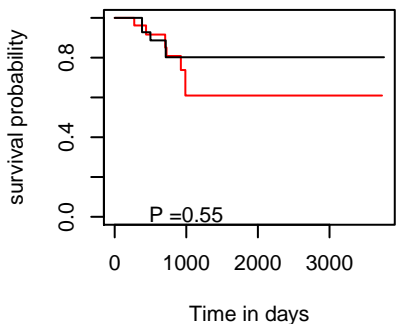**DSS hsa-mir-425**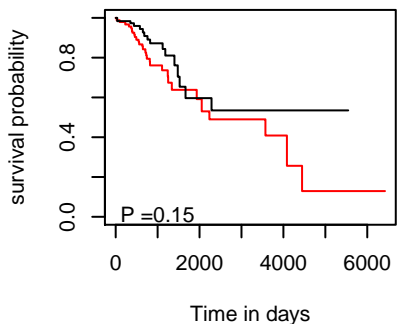**OS hsa-mir-5193**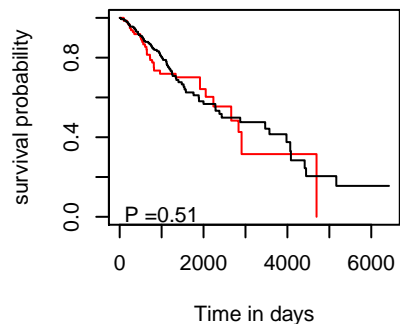

**PFI hsa-mir-5193**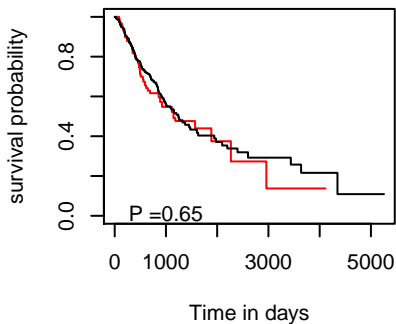**DFI hsa-mir-5193**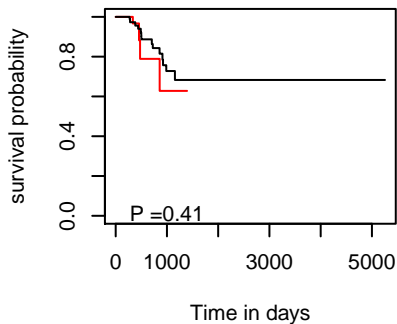**DSS hsa-mir-5193**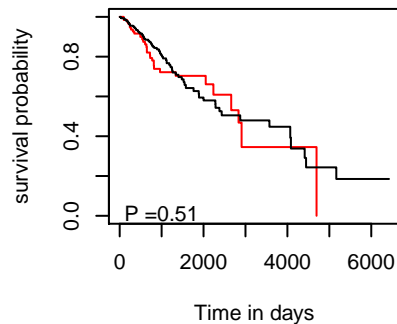**OS hsa-mir-26a-2**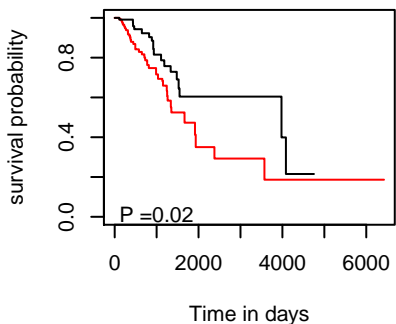**PFI hsa-mir-26a-2**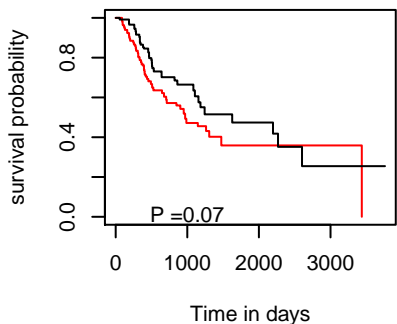**DFI hsa-mir-26a-2**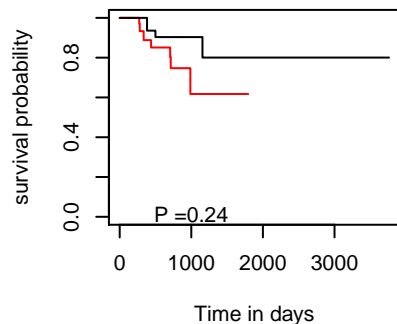**DSS hsa-mir-26a-2**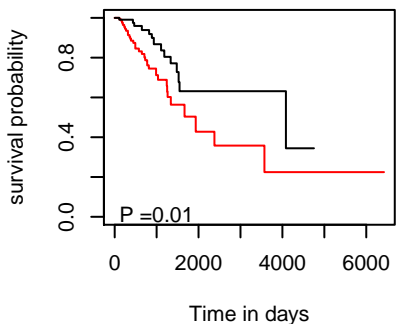**OS hsa-mir-339**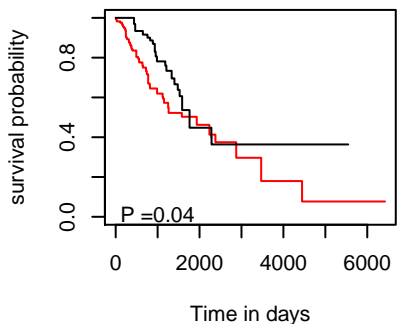**PFI hsa-mir-339**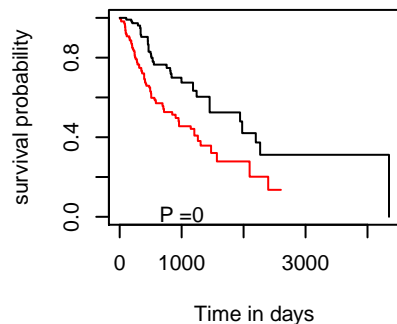

**DFI hsa-mir-339**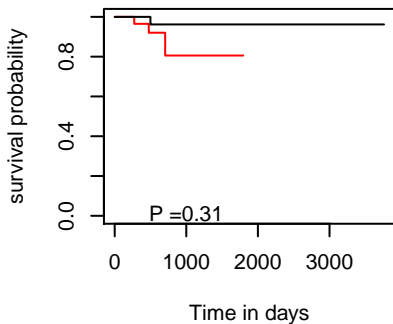**DSS hsa-mir-339**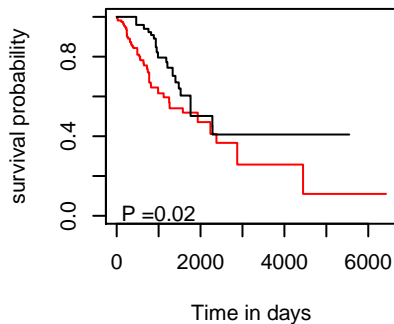**OS hsa-mir-4645**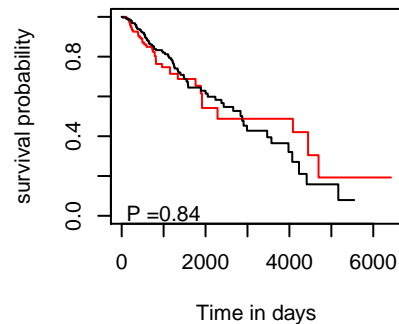**PFI hsa-mir-4645**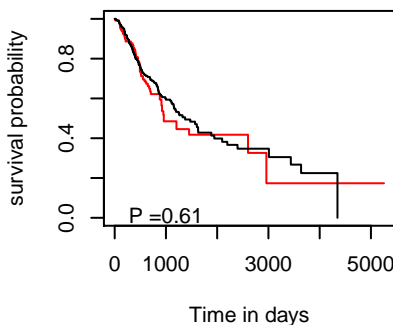**DFI hsa-mir-4645**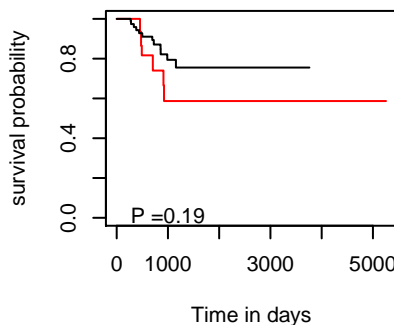**DSS hsa-mir-4645**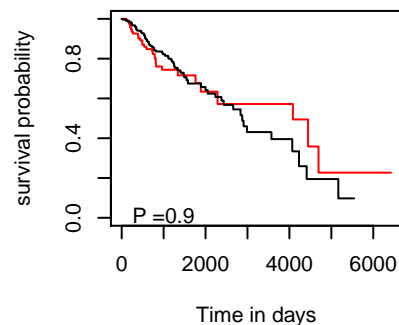**OS hsa-mir-4648**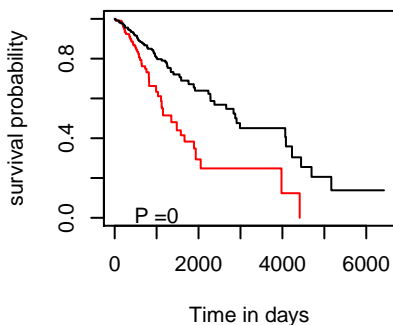**PFI hsa-mir-4648**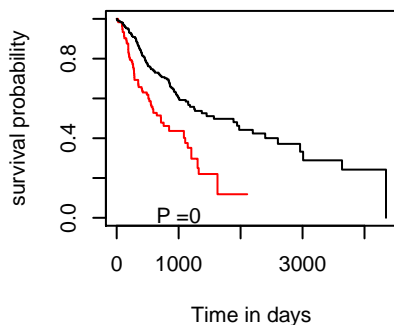**DFI hsa-mir-4648**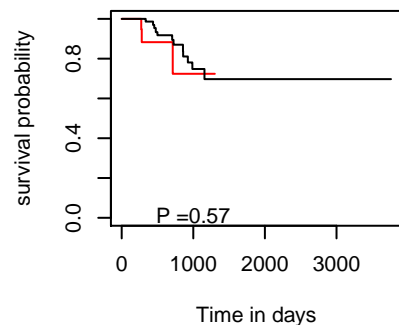

**DSS hsa-mir-4648**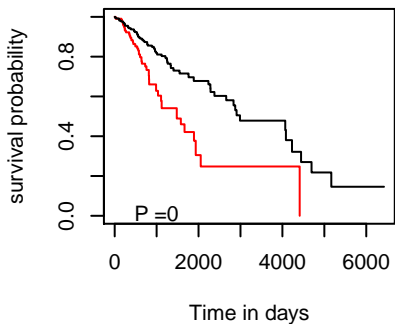**OS hsa-mir-765**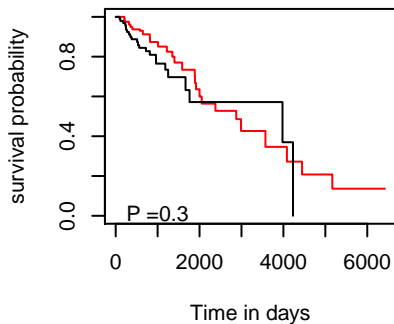**PFI hsa-mir-765**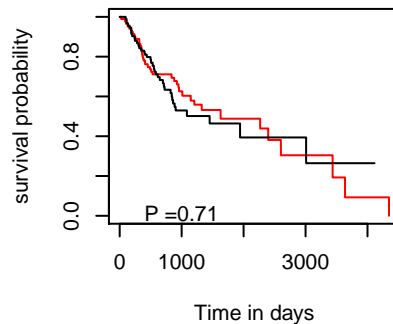**DFI hsa-mir-765**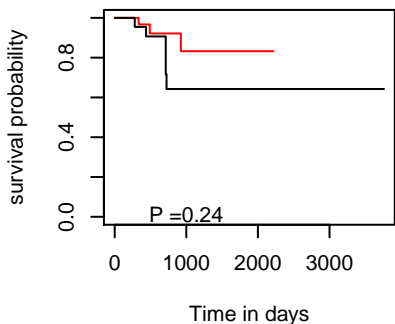**DSS hsa-mir-765**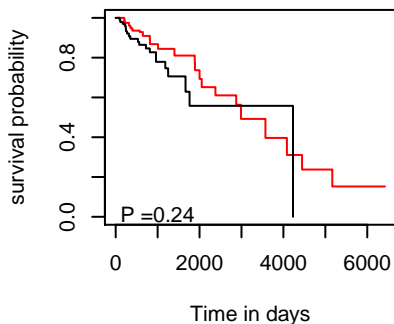**OS hsa-mir-9-1**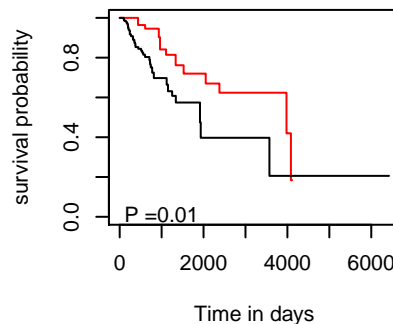**PFI hsa-mir-9-1**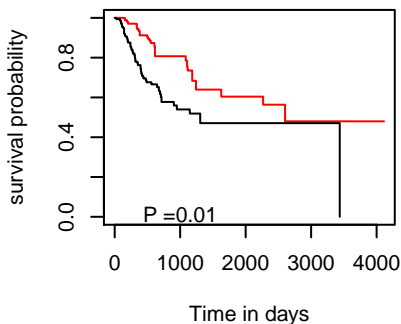**DFI hsa-mir-9-1**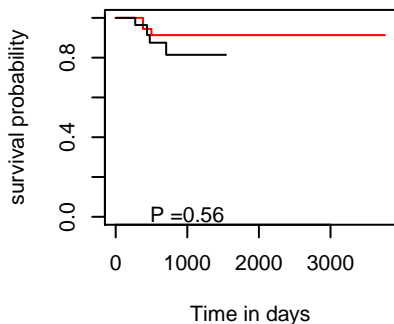**DSS hsa-mir-9-1**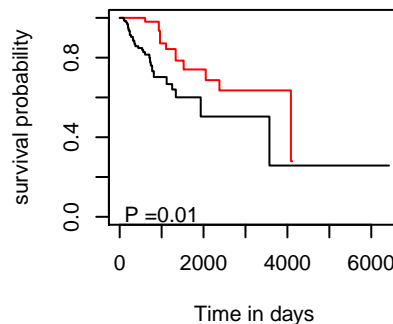

**OS hsa-mir-138-1**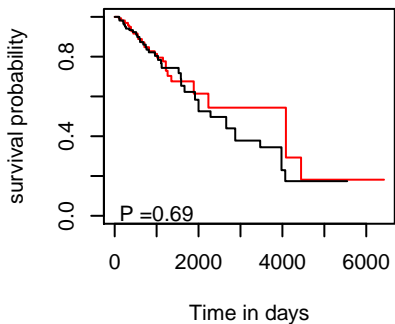**PFI hsa-mir-138-1**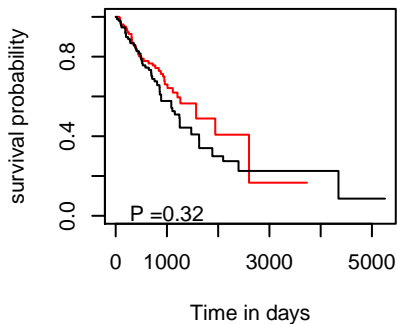**DFI hsa-mir-138-1**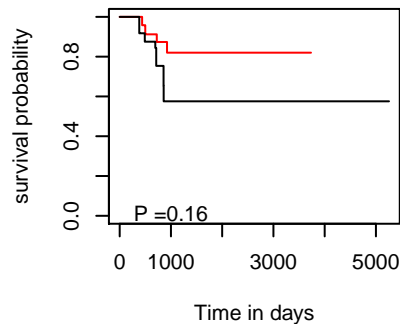**DSS hsa-mir-138-1**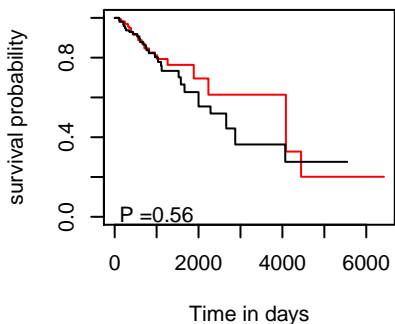**OS hsa-mir-3619**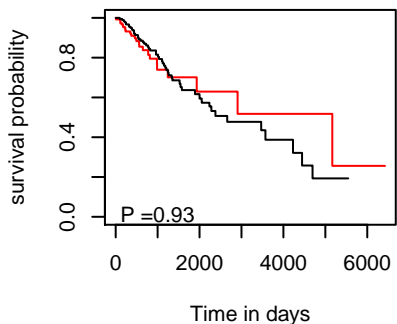**PFI hsa-mir-3619**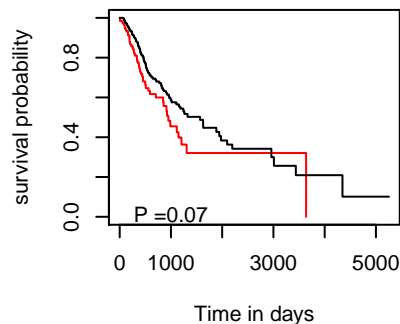**DFI hsa-mir-3619**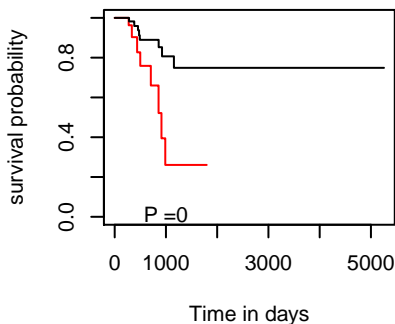**DSS hsa-mir-3619**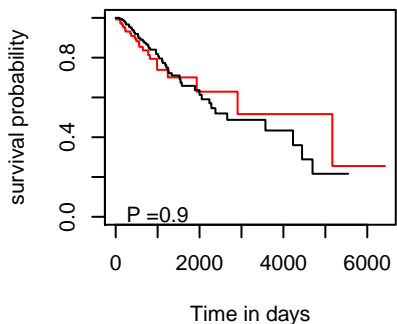**OS hsa-mir-4443**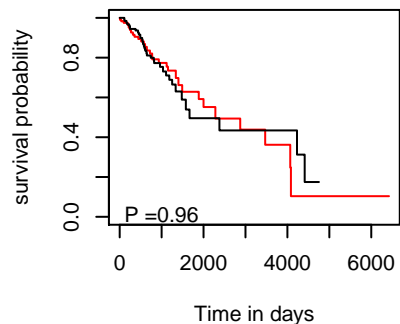

**PFI hsa-mir-4443**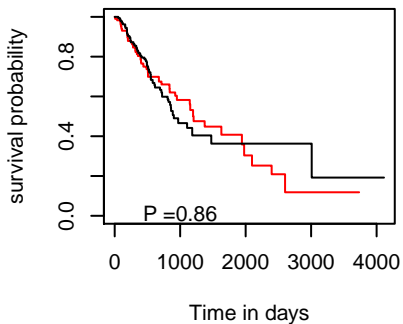**DFI hsa-mir-4443**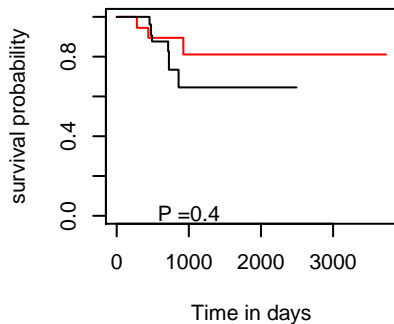**DSS hsa-mir-4443**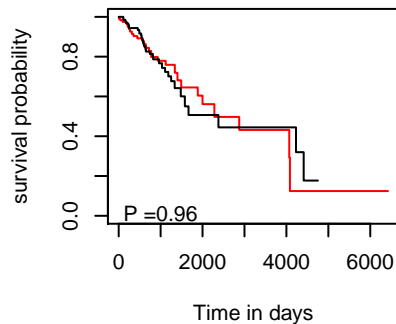**OS hsa-mir-4763**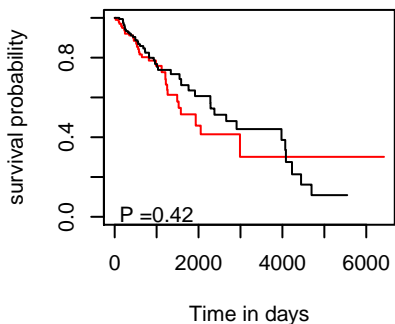**PFI hsa-mir-4763**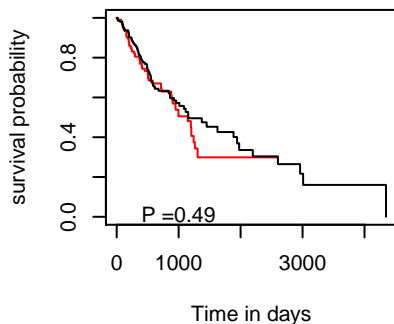**DFI hsa-mir-4763**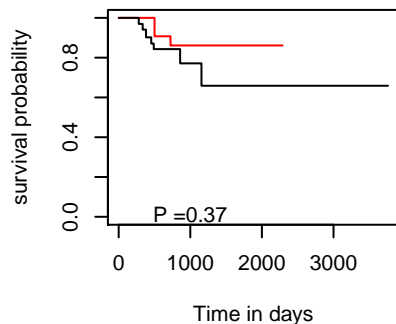**DSS hsa-mir-4763**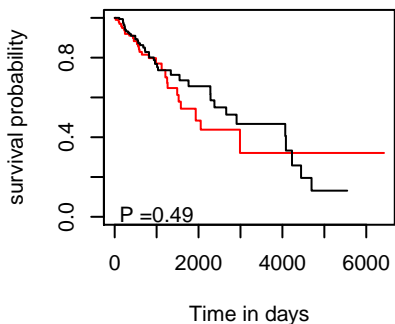**OS hsa-mir-4787**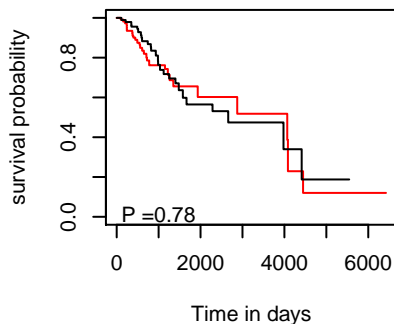**PFI hsa-mir-4787**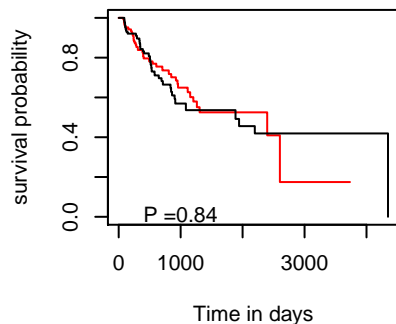

**DFI hsa-mir-4787**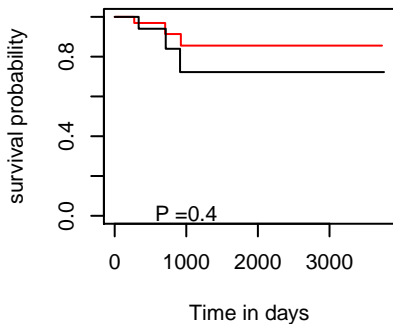**DSS hsa-mir-4787**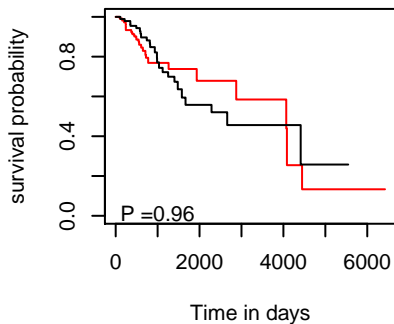**OS hsa-mir-616**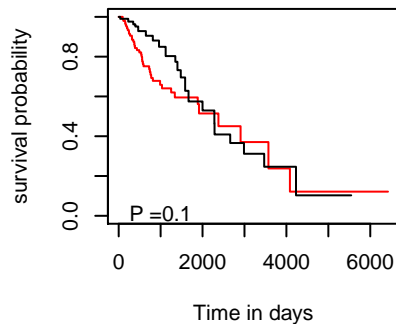**PFI hsa-mir-616**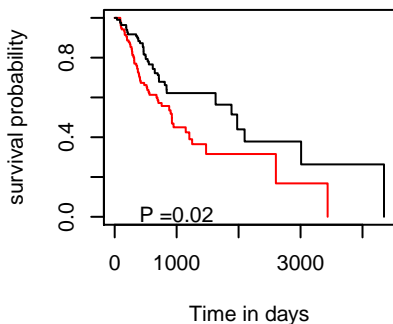**DFI hsa-mir-616**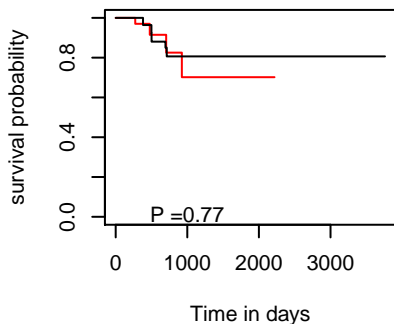**DSS hsa-mir-616**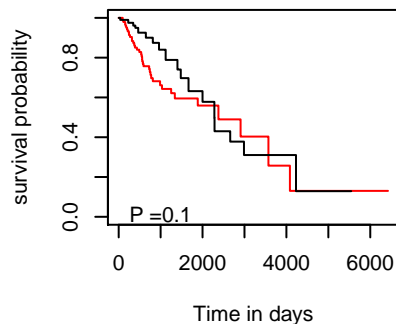**OS hsa-mir-3615**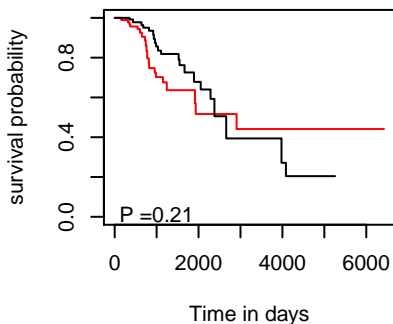**PFI hsa-mir-3615**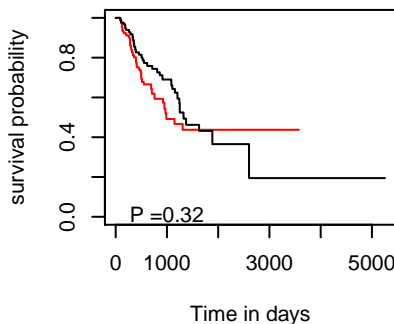**DFI hsa-mir-3615**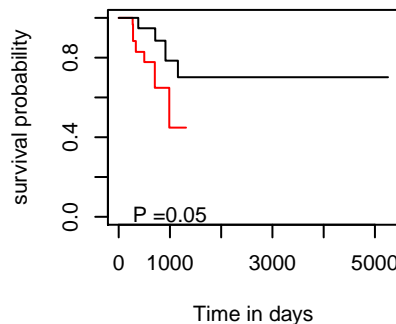

**DSS hsa-mir-3615**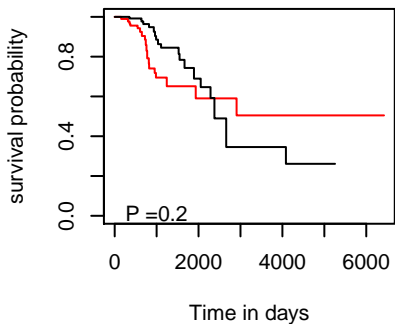**OS hsa-mir-100**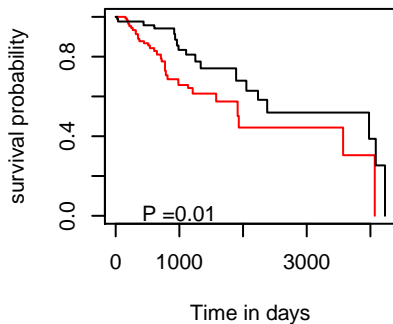**PFI hsa-mir-100**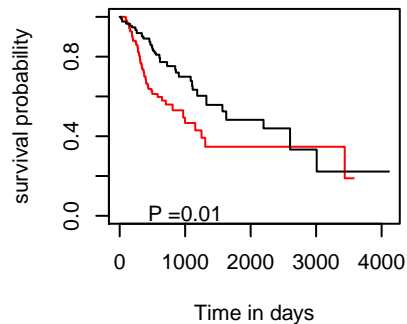**DFI hsa-mir-100**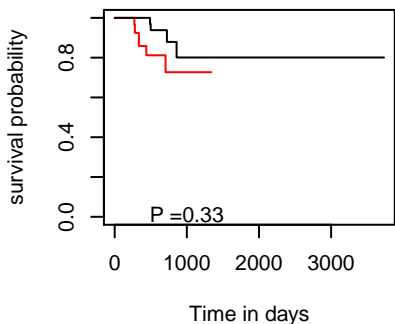**DSS hsa-mir-100**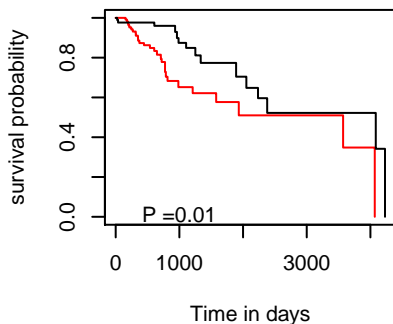**OS hsa-mir-3151**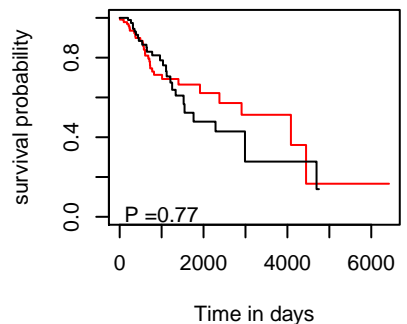**PFI hsa-mir-3151**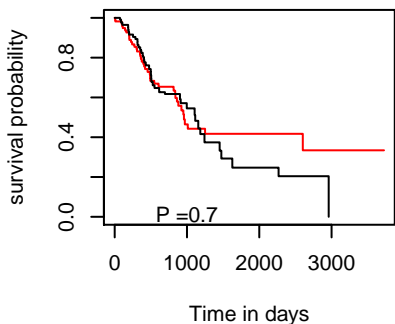**DFI hsa-mir-3151**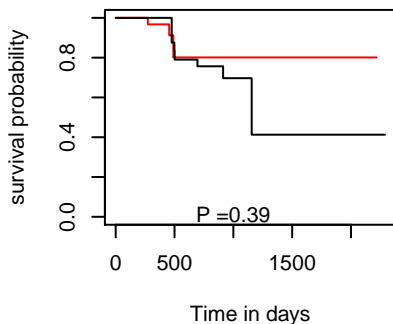**DSS hsa-mir-3151**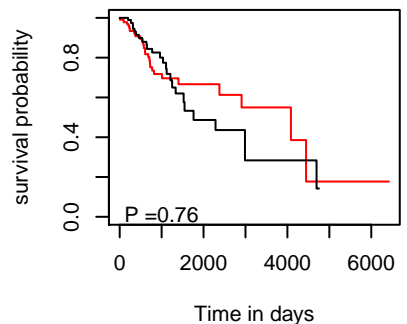

**OS hsa-let-7b**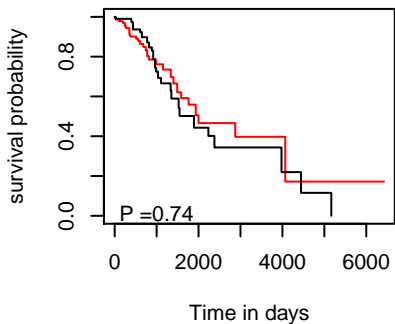**PFI hsa-let-7b**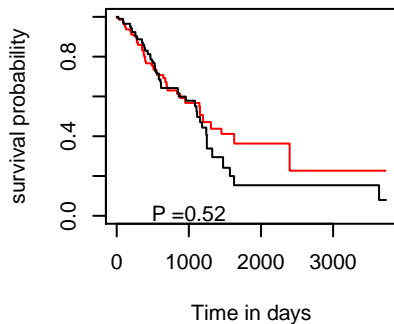**DFI hsa-let-7b**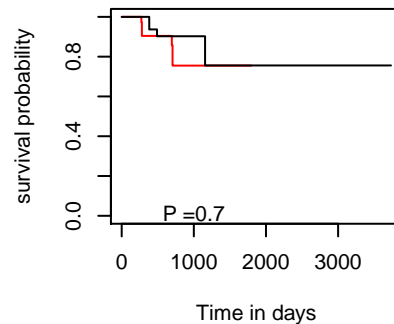**DSS hsa-let-7b**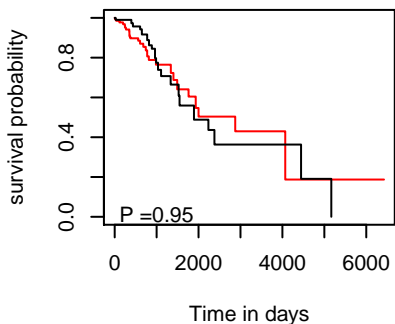**OS hsa-mir-5699**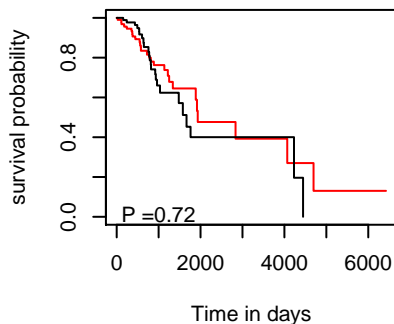**PFI hsa-mir-5699**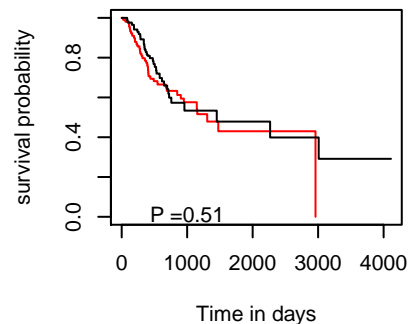**DFI hsa-mir-5699**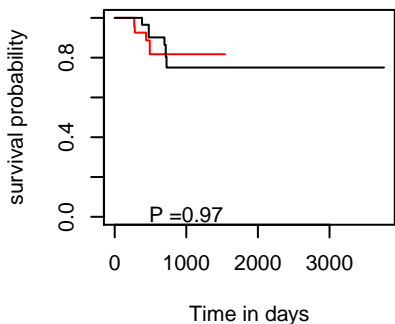**DSS hsa-mir-5699**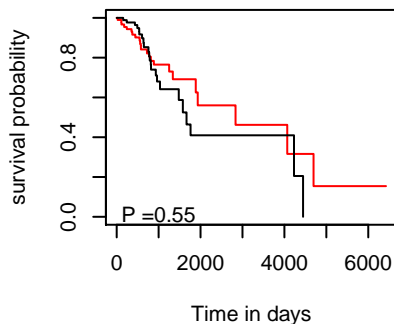**OS hsa-mir-4449**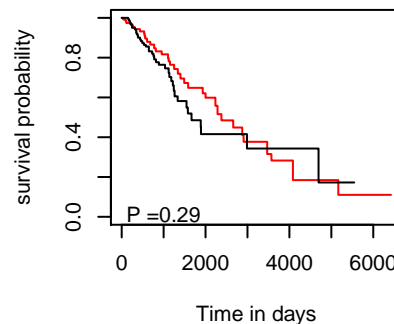

**PFI hsa-mir-4449**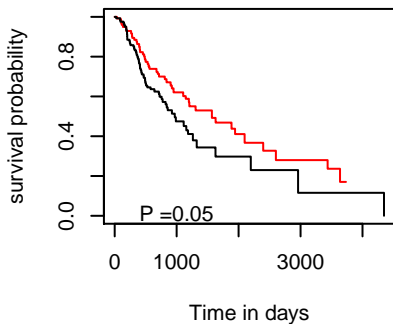**DFI hsa-mir-4449**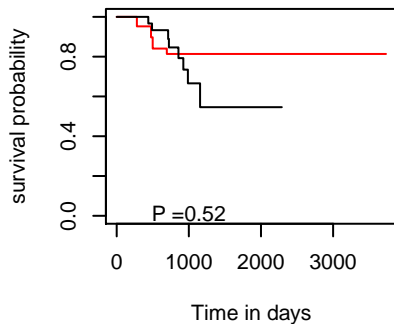**DSS hsa-mir-4449**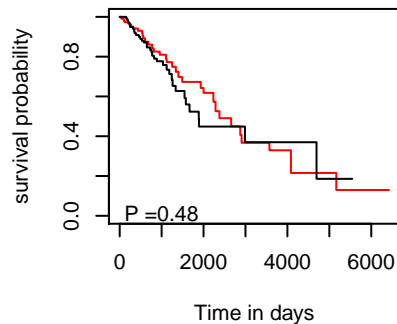**OS hsa-mir-5703**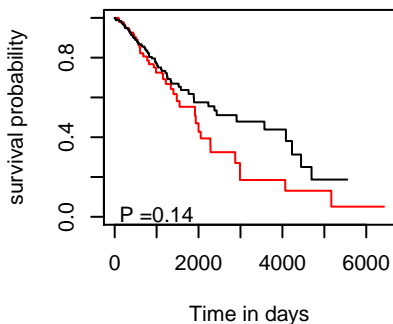**PFI hsa-mir-5703**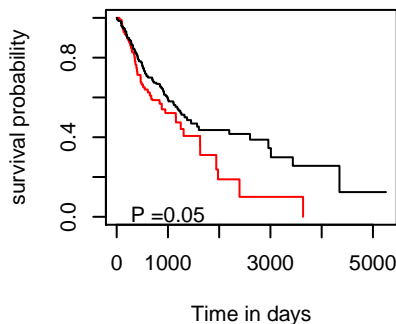**DFI hsa-mir-5703**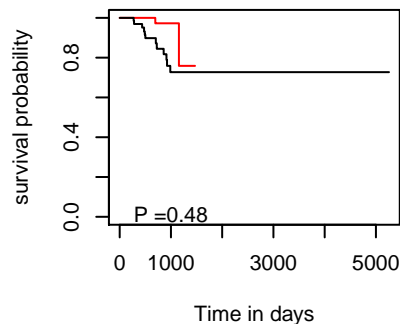**DSS hsa-mir-5703**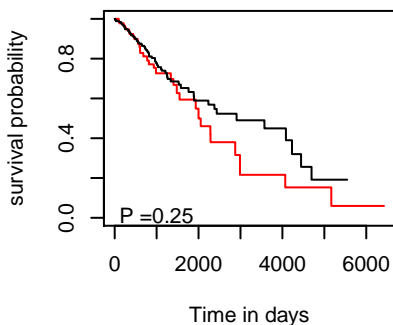**OS hsa-mir-4777**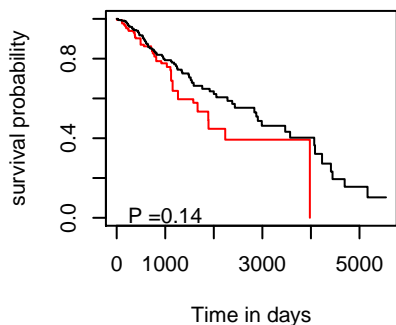**PFI hsa-mir-4777**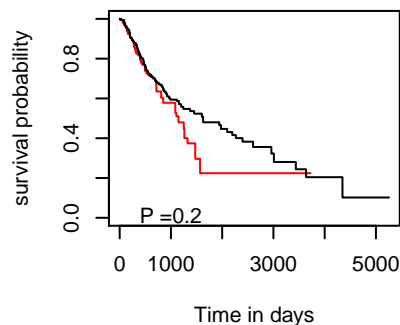

**DFI hsa-mir-4777**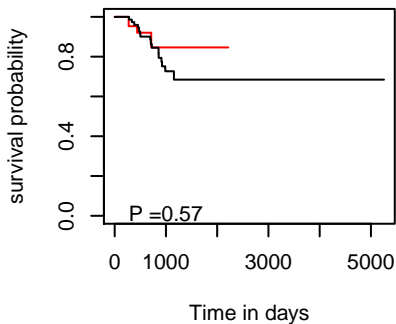**DSS hsa-mir-4777**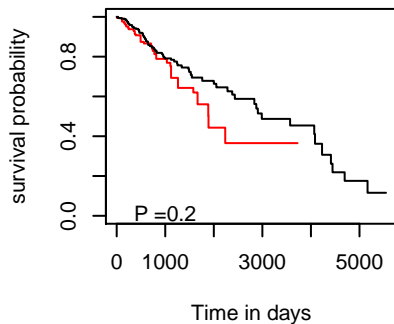**OS hsa-mir-4745**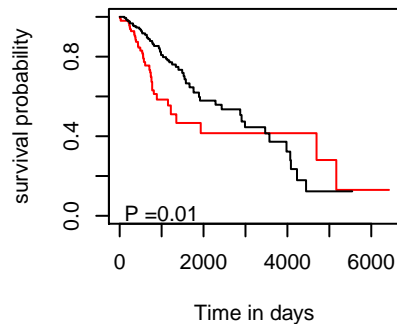**PFI hsa-mir-4745**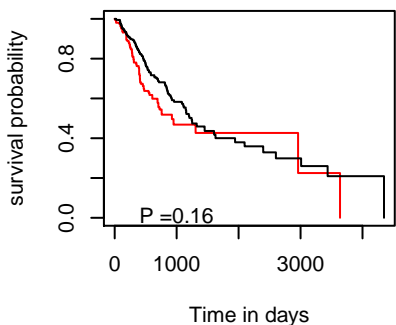**DFI hsa-mir-4745**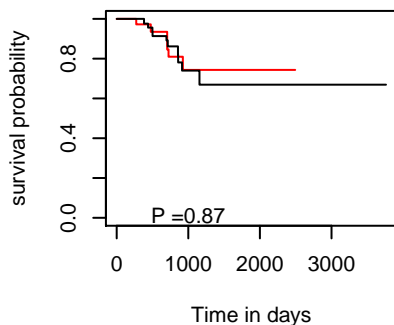**DSS hsa-mir-4745**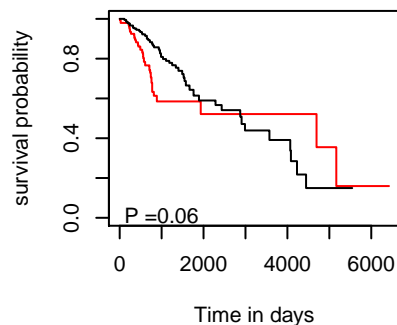**OS hsa-mir-4762**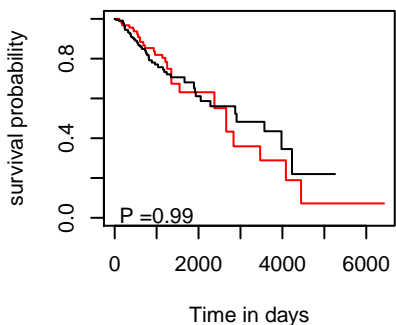**PFI hsa-mir-4762**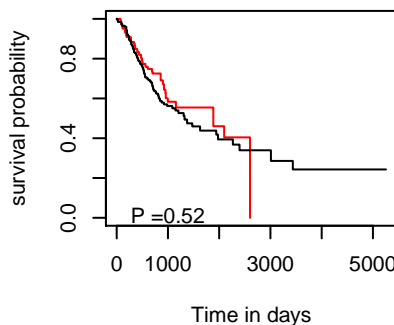**DFI hsa-mir-4762**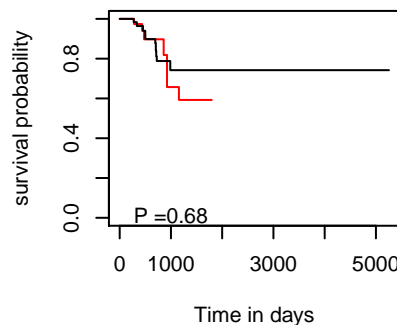



**OS hsa-mir-4677**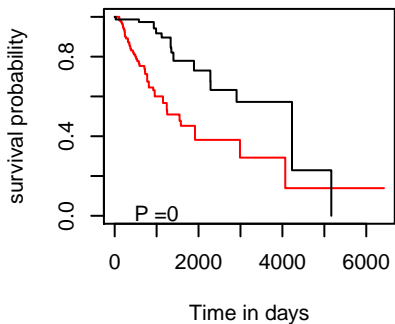**PFI hsa-mir-4677**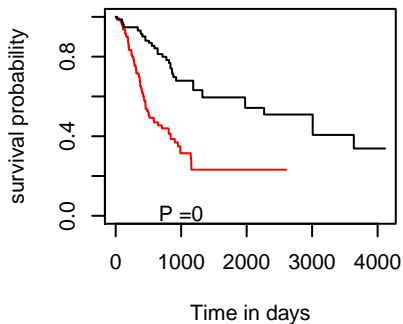**DFI hsa-mir-4677**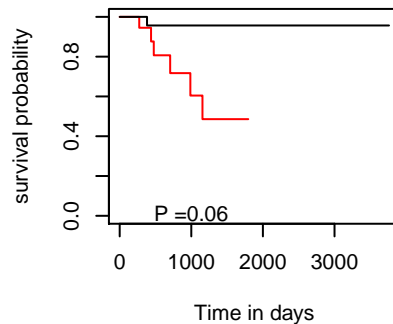**DSS hsa-mir-4677**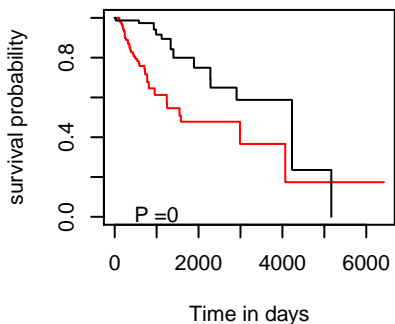**OS hsa-mir-200c**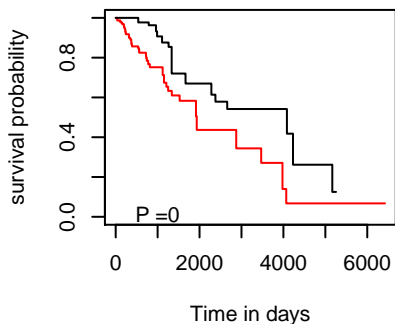**PFI hsa-mir-200c**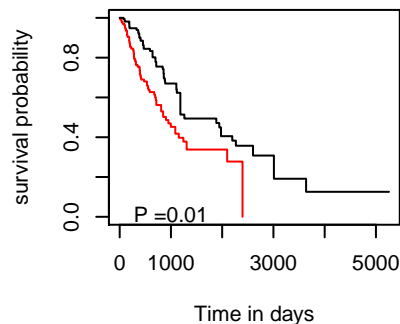**DFI hsa-mir-200c**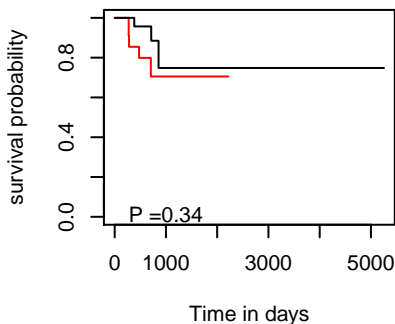**DSS hsa-mir-200c**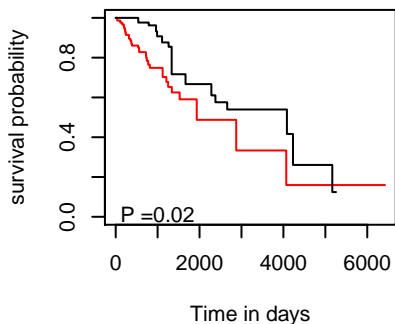**OS hsa-mir-1226**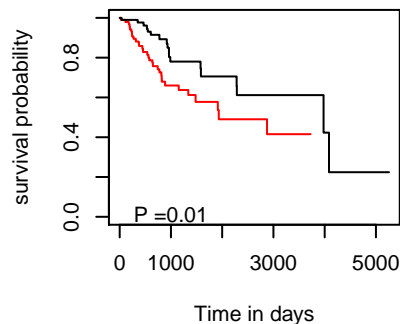

**PFI hsa-mir-1226**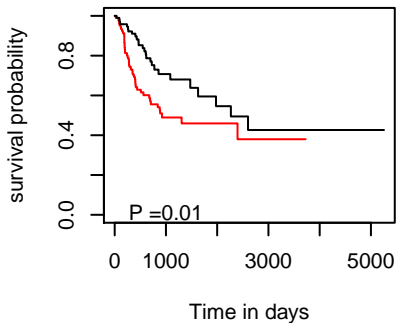**DFI hsa-mir-1226**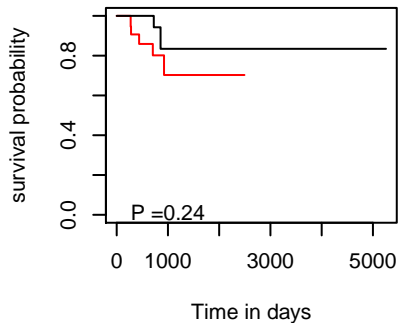**DSS hsa-mir-1226**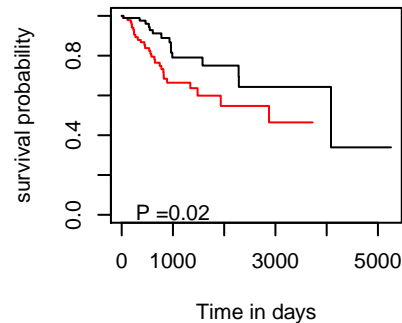**OS hsa-mir-340**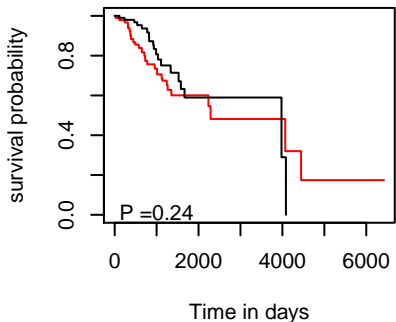**PFI hsa-mir-340**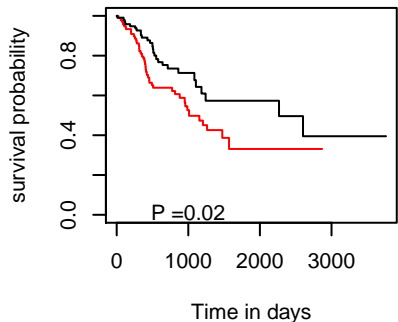**DFI hsa-mir-340**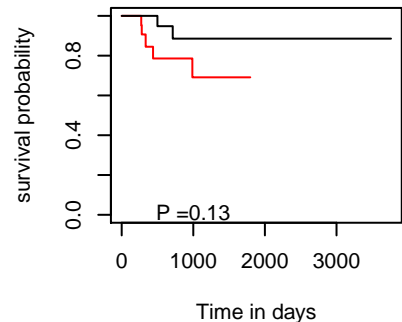**DSS hsa-mir-340**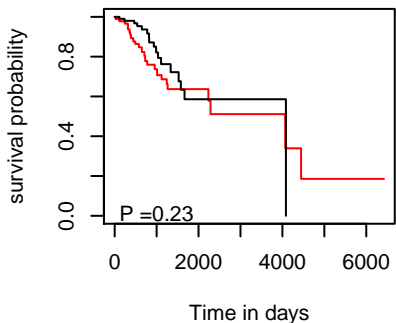**OS hsa-let-7a-3**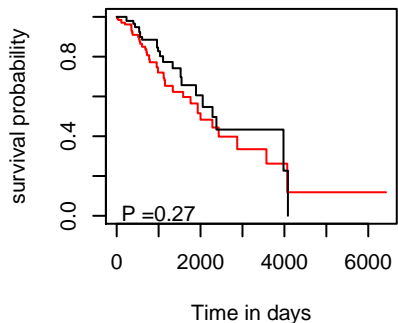**PFI hsa-let-7a-3**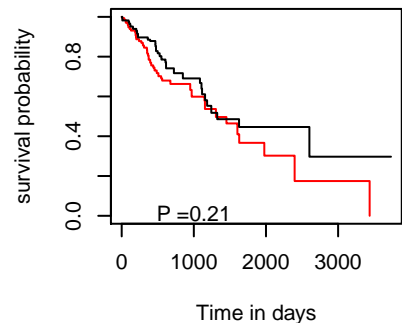

**DFI hsa-let-7a-3**

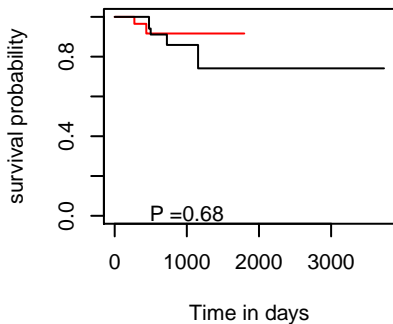

**DSS hsa-let-7a-3**

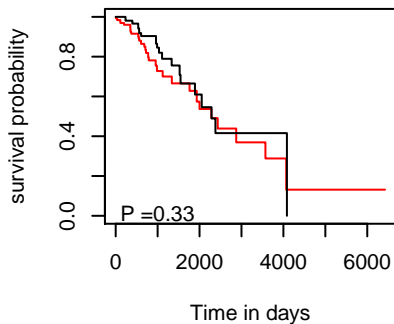

**OS hsa-mir-191**

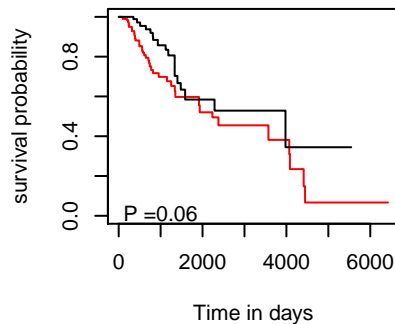

**PFI hsa-mir-191**

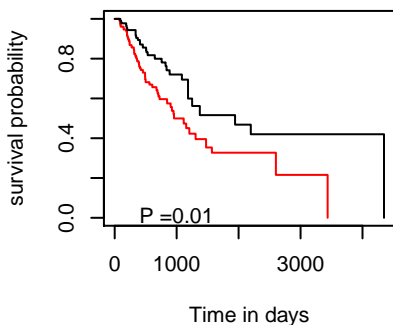

**DFI hsa-mir-191**

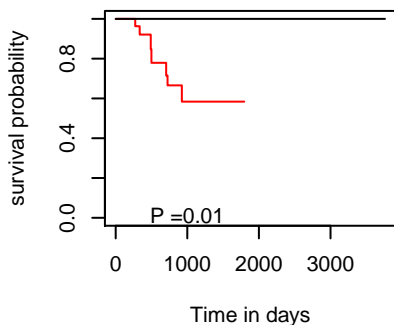

**DSS hsa-mir-191**

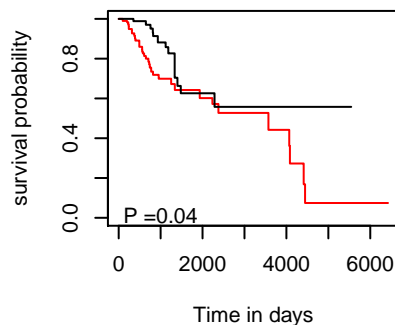

**OS hsa-mir-570**

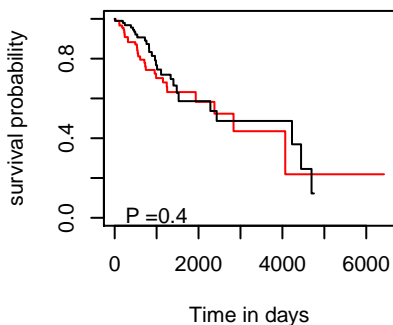

**PFI hsa-mir-570**

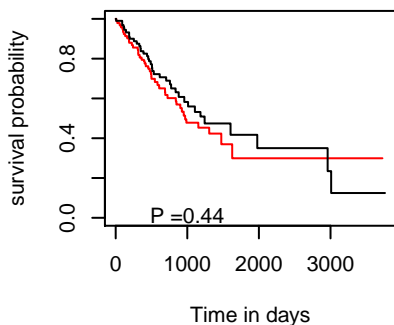

**DFI hsa-mir-570**

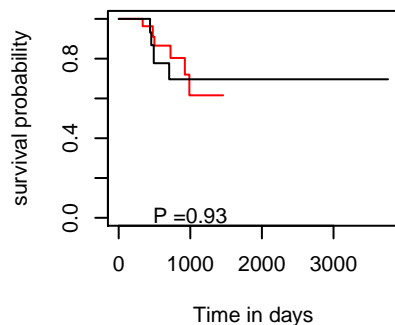

**DSS hsa-mir-570**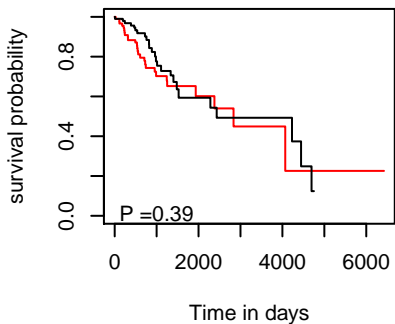**OS hsa-mir-31**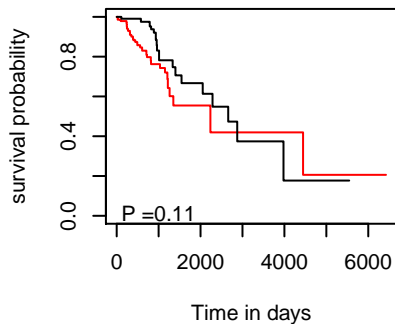**PFI hsa-mir-31**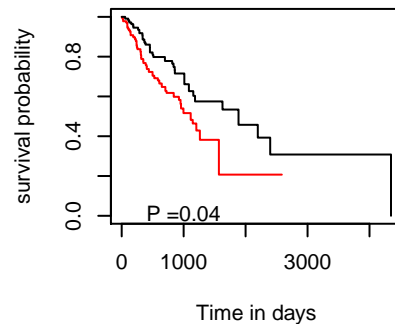**DFI hsa-mir-31**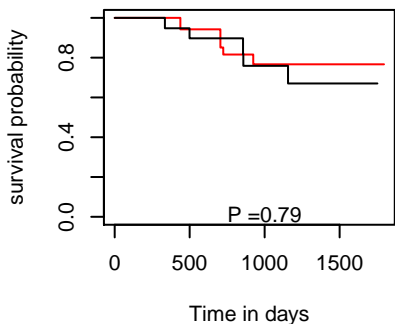**DSS hsa-mir-31**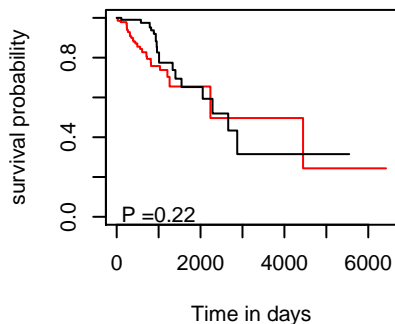**OS hsa-mir-2115**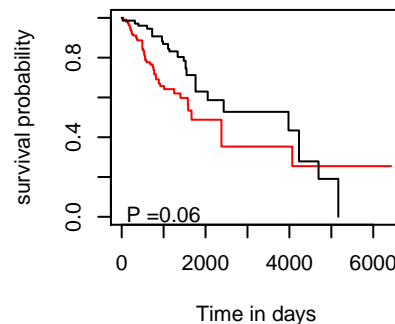**PFI hsa-mir-2115**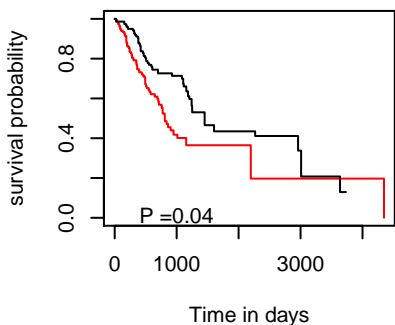**DFI hsa-mir-2115**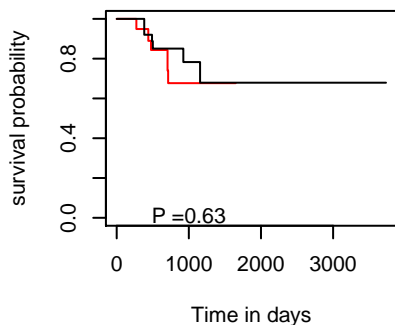**DSS hsa-mir-2115**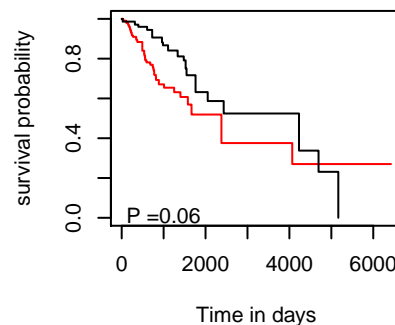

Supplement: MOESM19 [file 41598_2022_7628_MOESM19_ESM.pdf]
