# Supplementary material for: New Thinking on Read-Aloud.
Source: Springer Nature journal article supplement (doi:10.1038/s41598-022-07628-z), 2001-01-01

# Computing microRNA-gene interaction networks in pan-cancer using miRDriver

Banabithi Bose, Matthew Moravec, and Serdar Bozdog

# Supplemental Figure S11

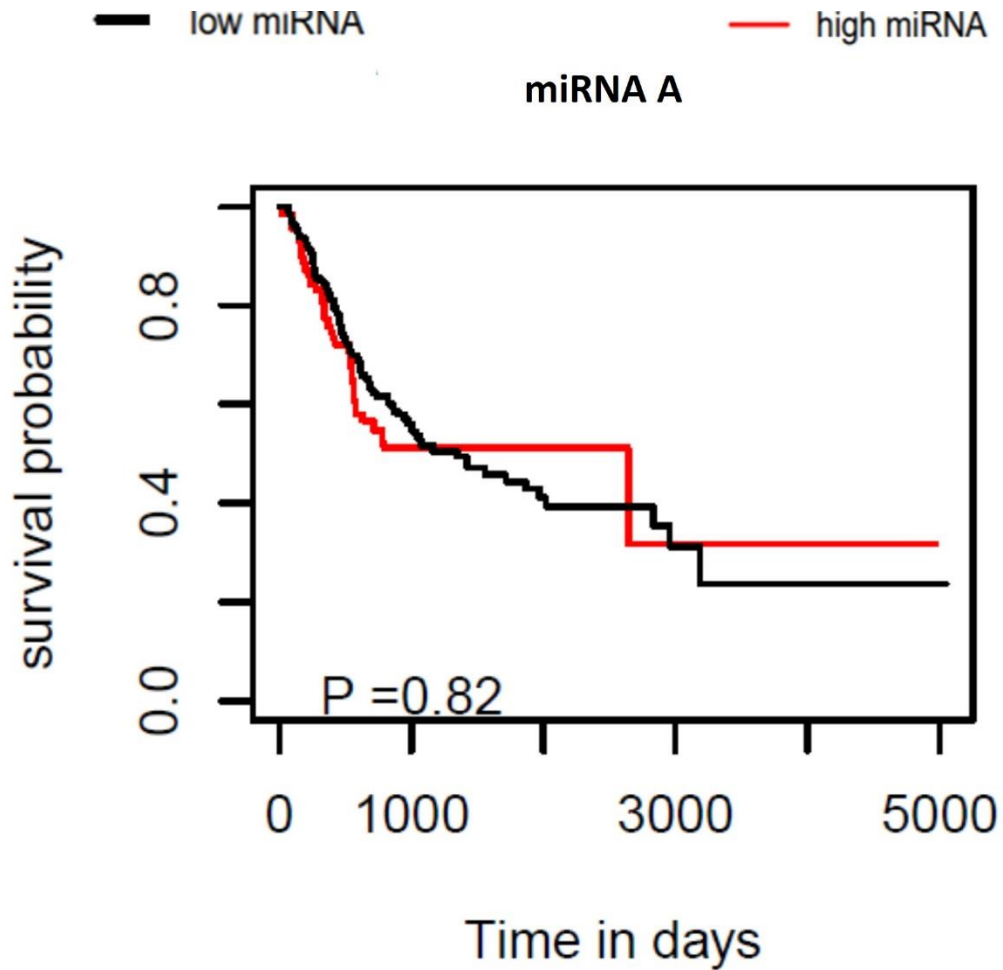

The *Adjusted Kaplan-Meier* survival plots for the computed miRNAs in high and low miRNA expression patient groups.

# Supplemental Figure S11

## Cancer Type: LIHC

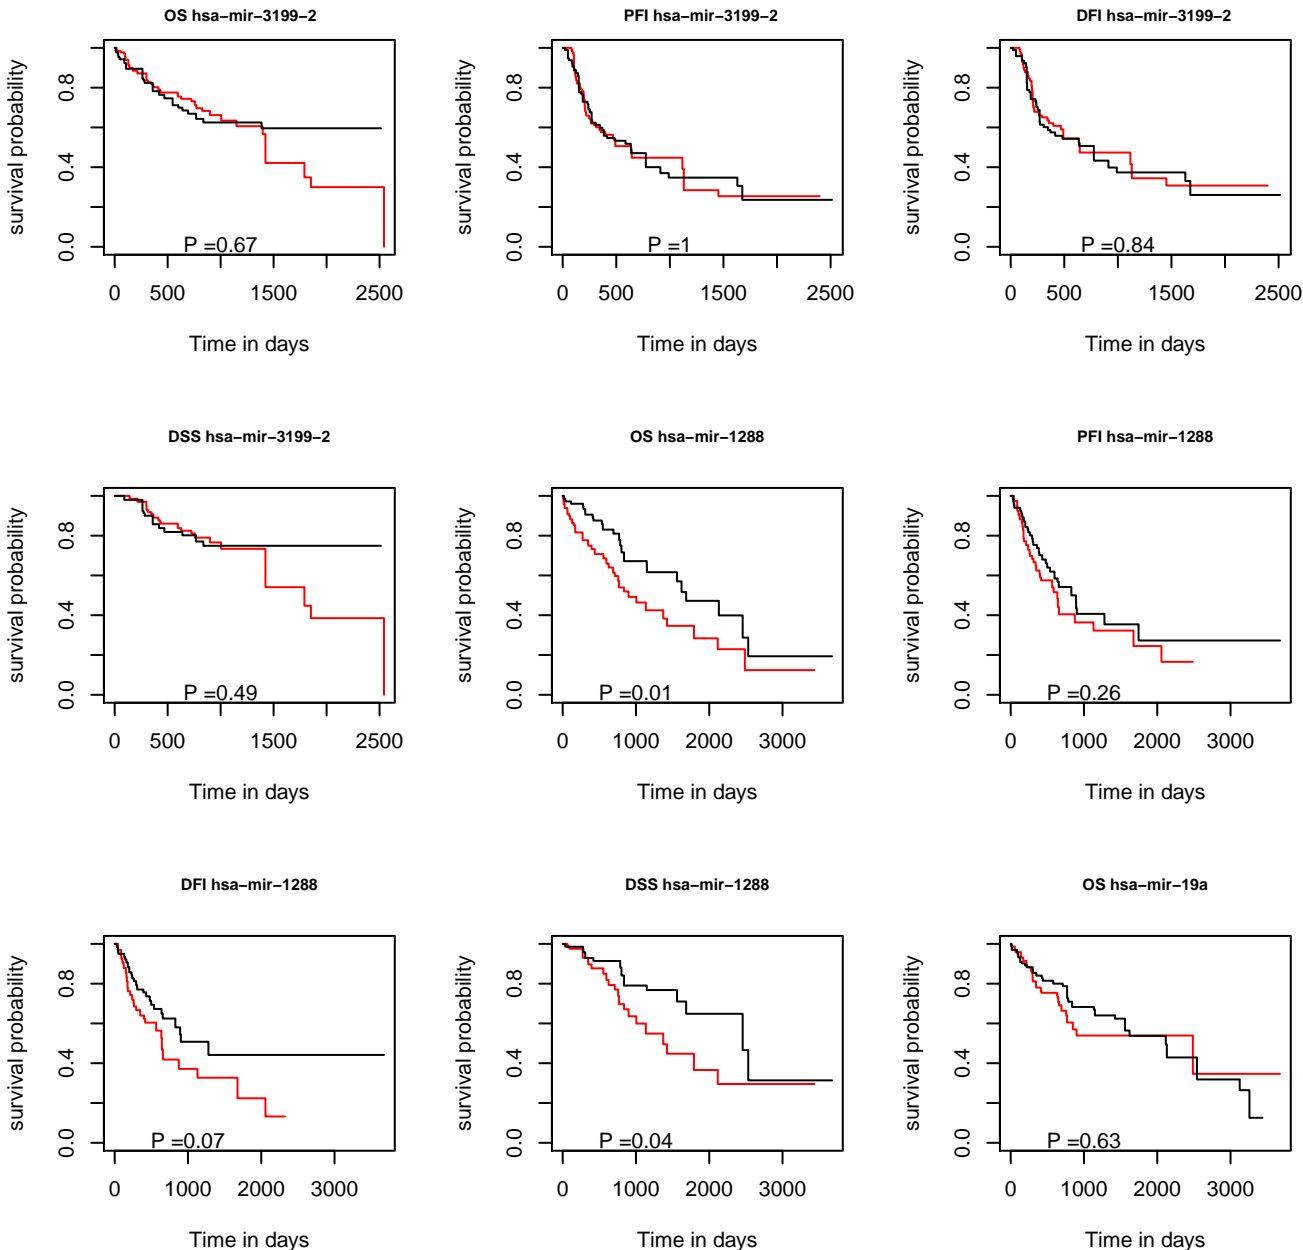

**PFI hsa-mir-19a**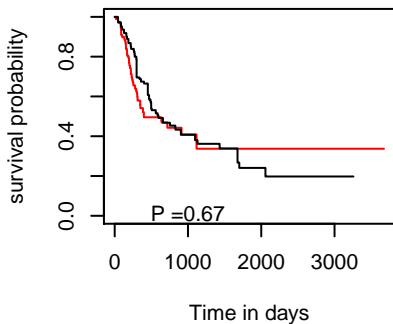**DFI hsa-mir-19a**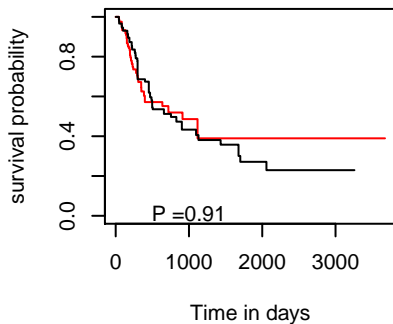**DSS hsa-mir-19a**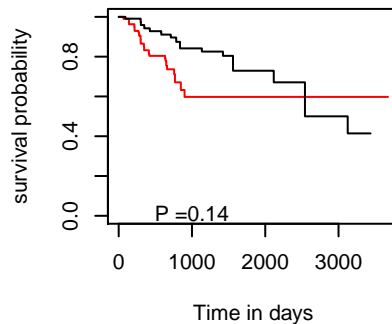**OS hsa-mir-28**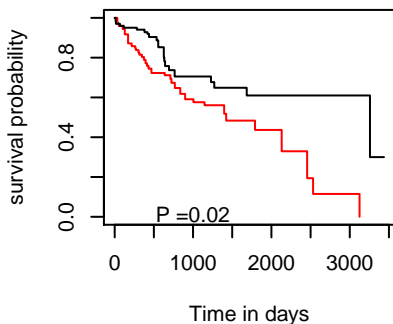**PFI hsa-mir-28**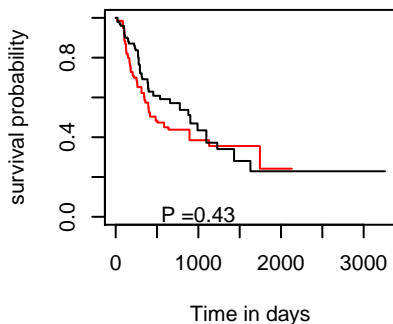**DFI hsa-mir-28**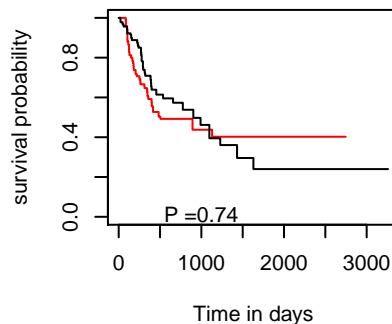**DSS hsa-mir-28**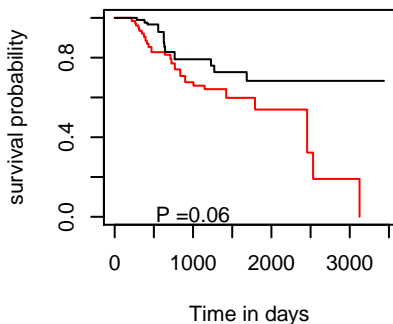**OS hsa-mir-4802**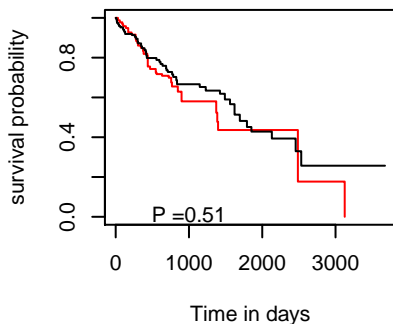**PFI hsa-mir-4802**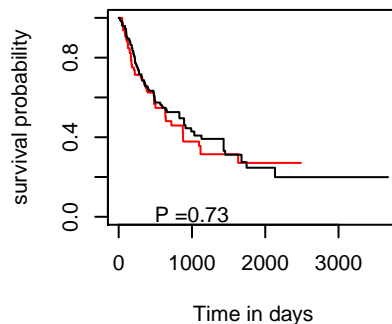

**DFI hsa-mir-4802**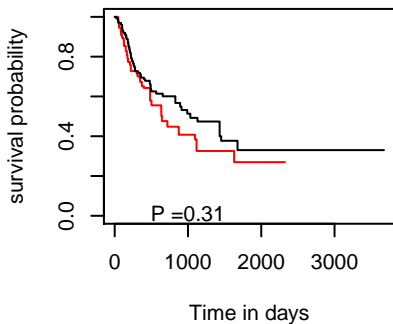**DSS hsa-mir-4802**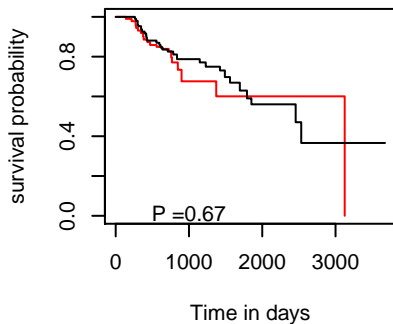**OS hsa-mir-1249**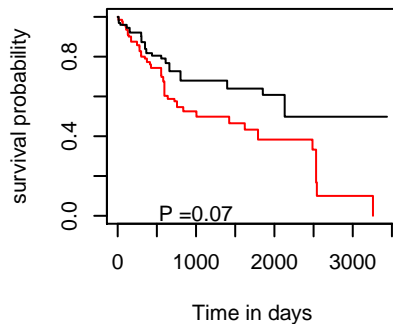**PFI hsa-mir-1249**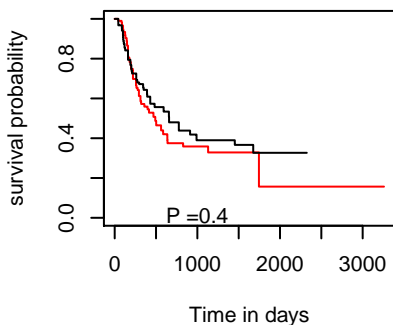**DFI hsa-mir-1249**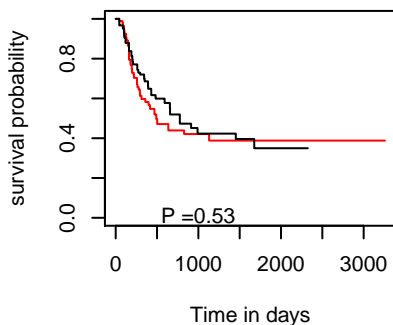**DSS hsa-mir-1249**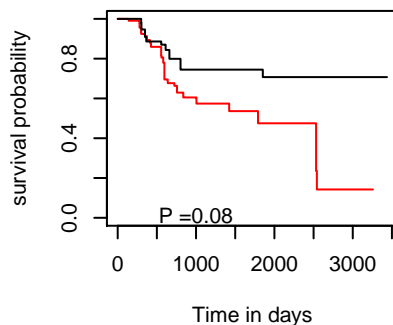**OS hsa-mir-1271**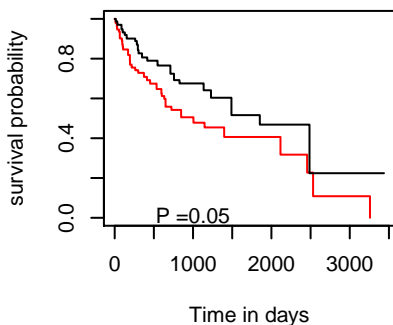**PFI hsa-mir-1271**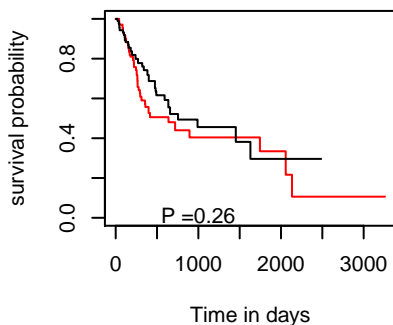**DFI hsa-mir-1271**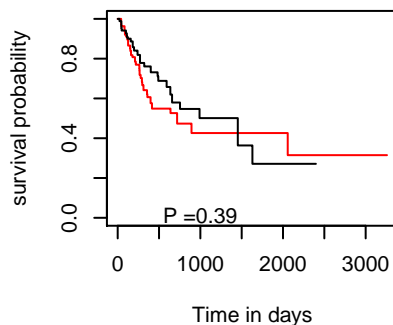

**DSS hsa-mir-1271**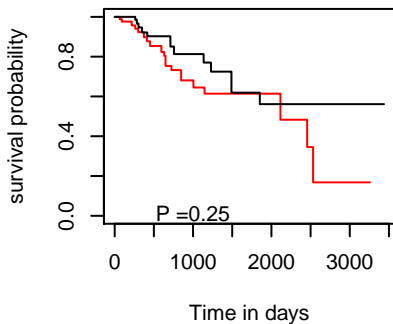**OS hsa-mir-3667**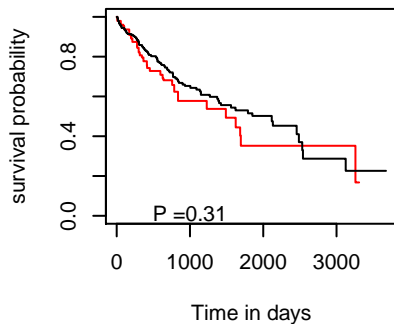**PFI hsa-mir-3667**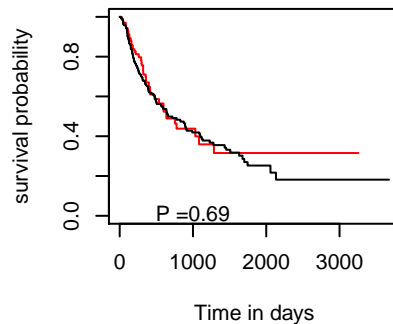**DFI hsa-mir-3667**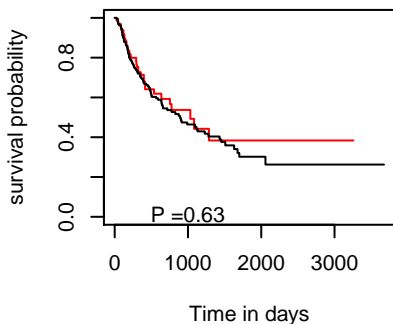**DSS hsa-mir-3667**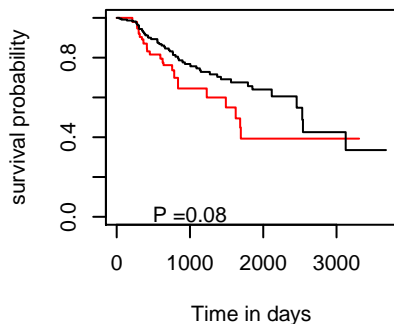**OS hsa-mir-4444-2**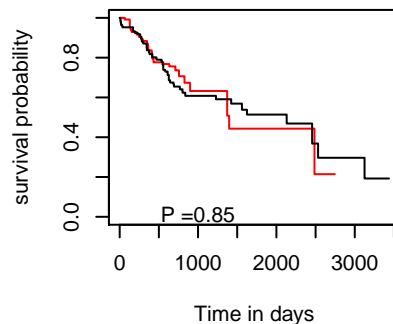**PFI hsa-mir-4444-2**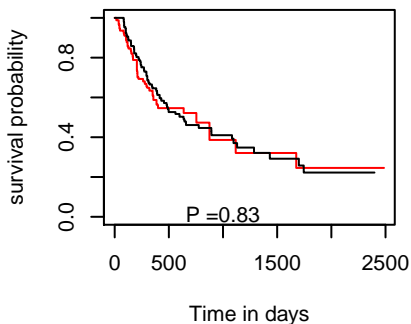**DFI hsa-mir-4444-2**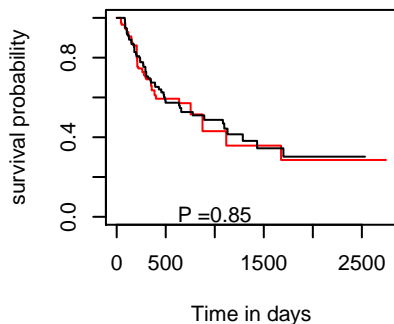**DSS hsa-mir-4444-2**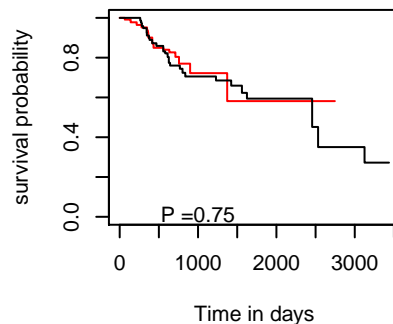

**OS hsa-mir-346**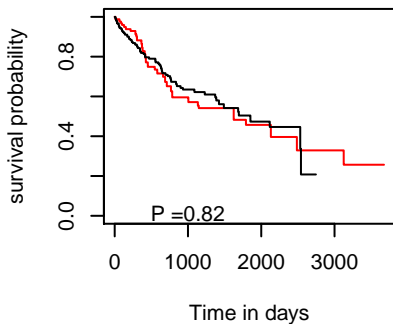**PFI hsa-mir-346**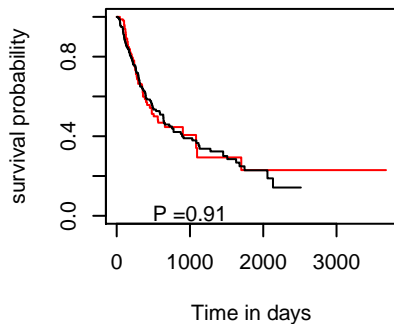**DFI hsa-mir-346**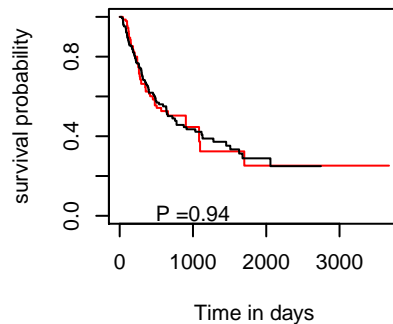**DSS hsa-mir-346**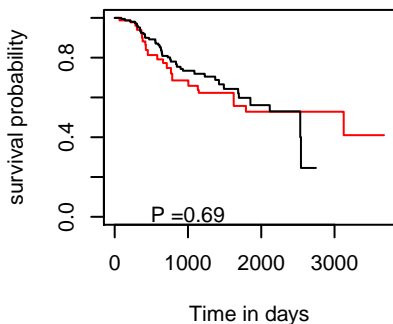**OS hsa-mir-1537**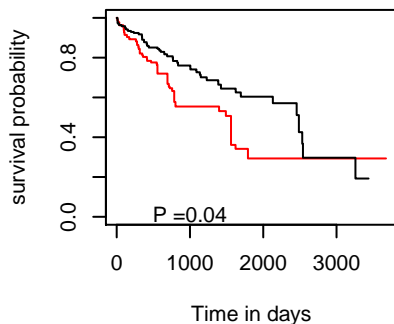**PFI hsa-mir-1537**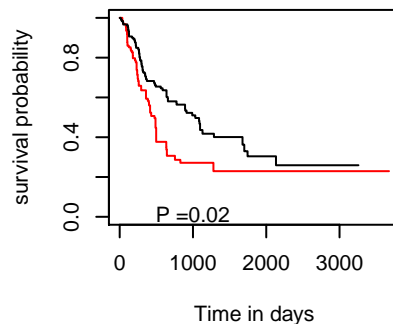**DFI hsa-mir-1537**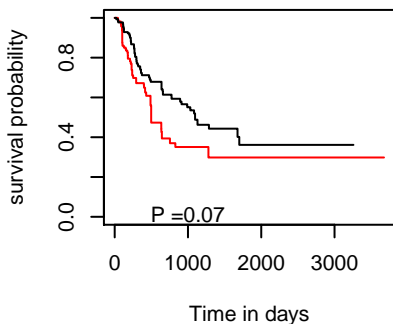**DSS hsa-mir-1537**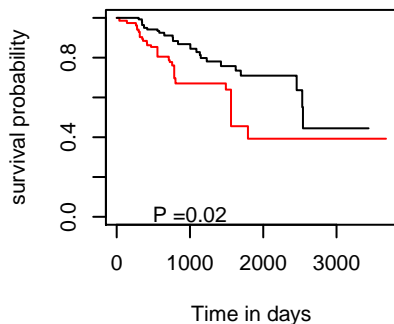**OS hsa-mir-4735**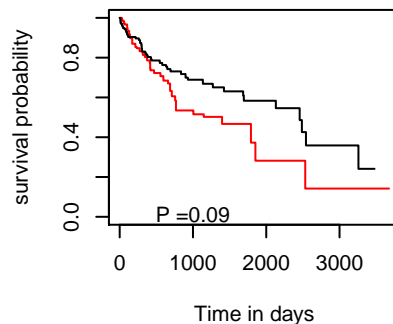

**PFI hsa-mir-4735**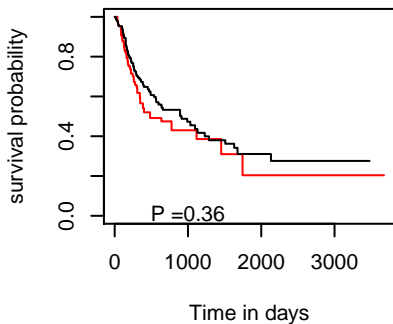**DFI hsa-mir-4735**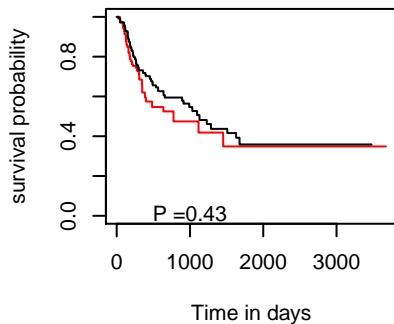**DSS hsa-mir-4735**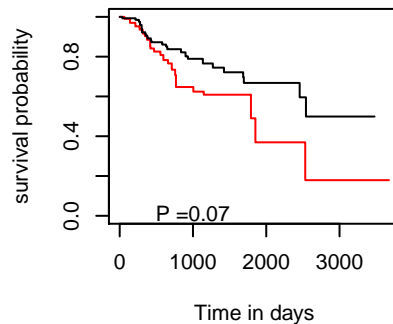**OS hsa-mir-181b-1**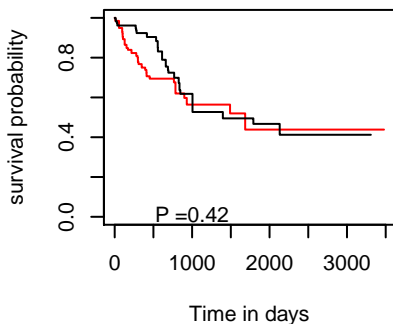**PFI hsa-mir-181b-1**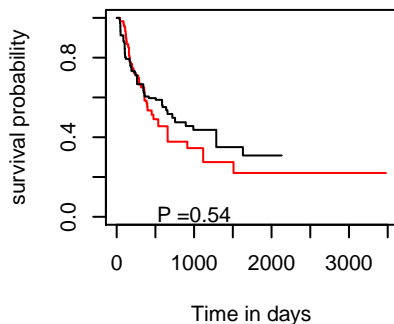**DFI hsa-mir-181b-1**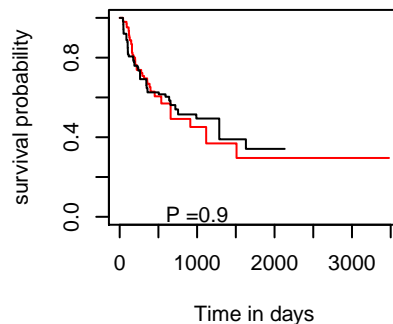**DSS hsa-mir-181b-1**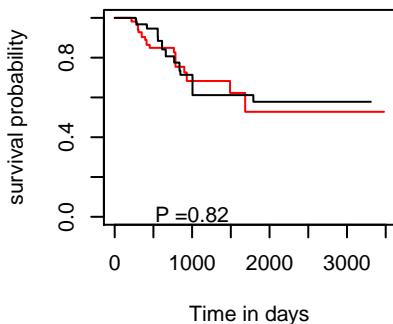**OS hsa-mir-3136**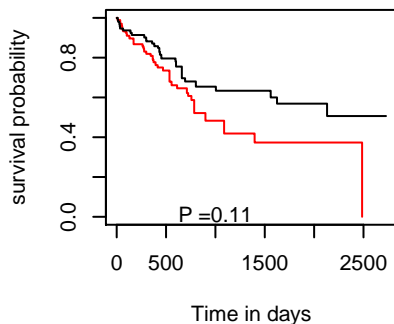**PFI hsa-mir-3136**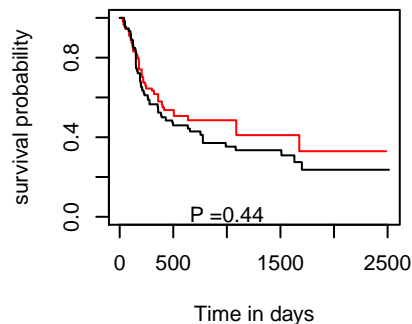

**DFI hsa-mir-3136**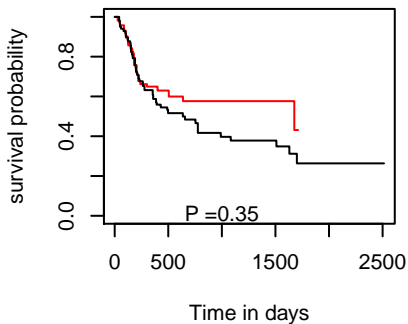**DSS hsa-mir-3136**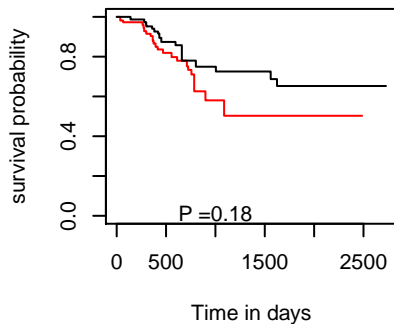**OS hsa-mir-4691**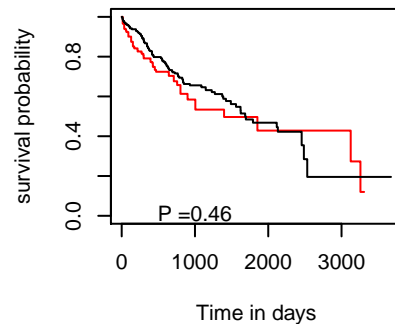**PFI hsa-mir-4691**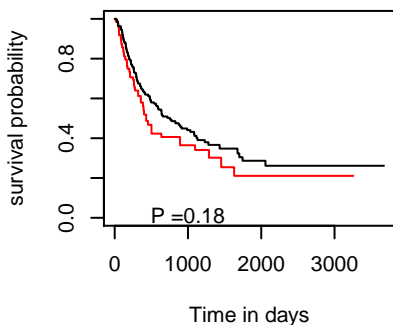**DFI hsa-mir-4691**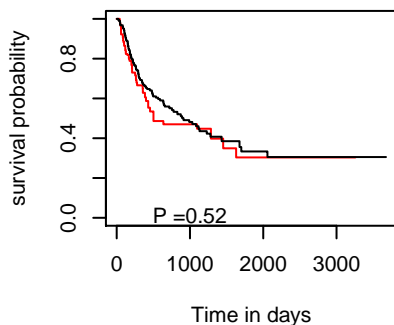**DSS hsa-mir-4691**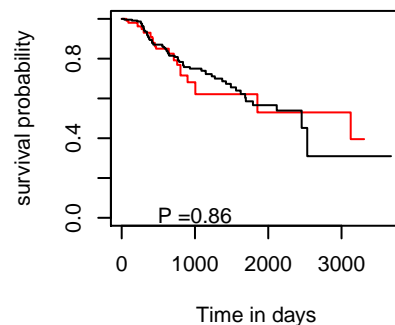**OS hsa-mir-1180**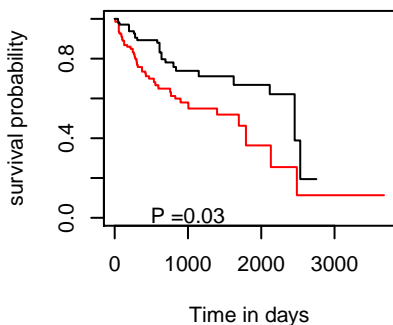**PFI hsa-mir-1180**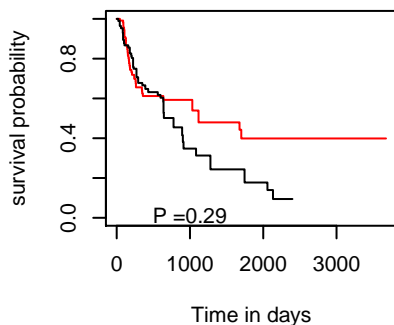**DFI hsa-mir-1180**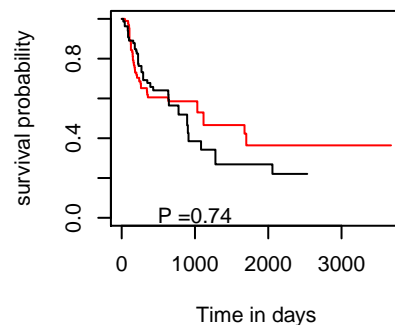

**DSS hsa-mir-1180**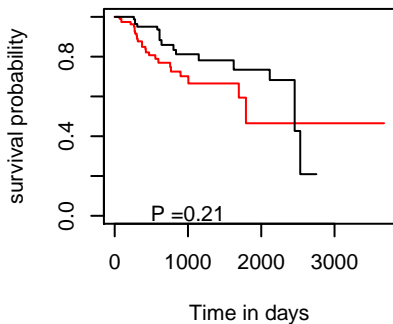**OS hsa-mir-4680**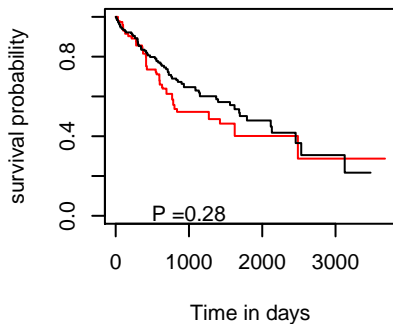**PFI hsa-mir-4680**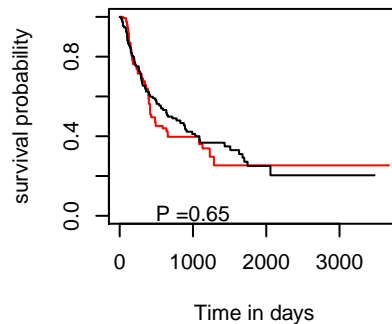**DFI hsa-mir-4680**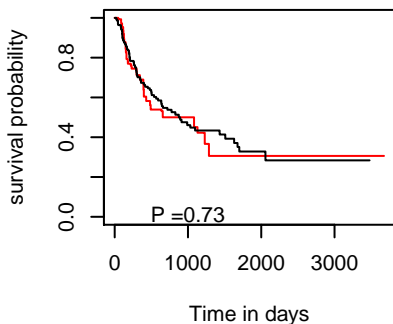**DSS hsa-mir-4680**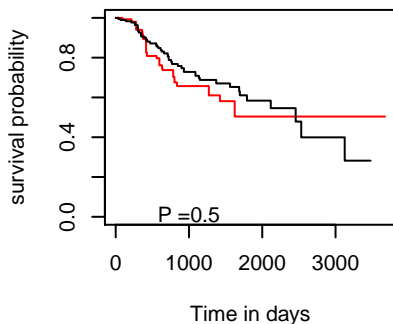**OS hsa-mir-7705**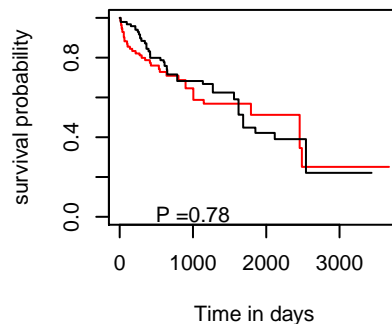**PFI hsa-mir-7705**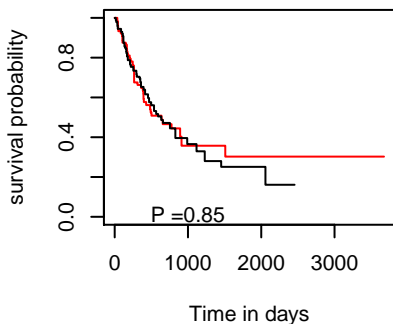**DFI hsa-mir-7705**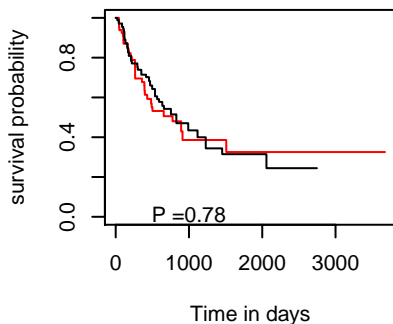**DSS hsa-mir-7705**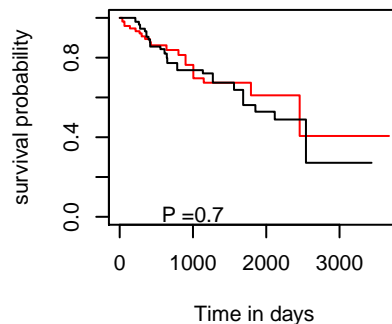

**OS hsa-mir-4326**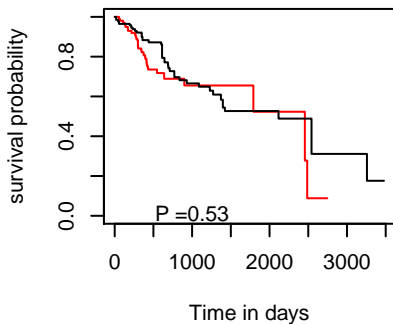**PFI hsa-mir-4326**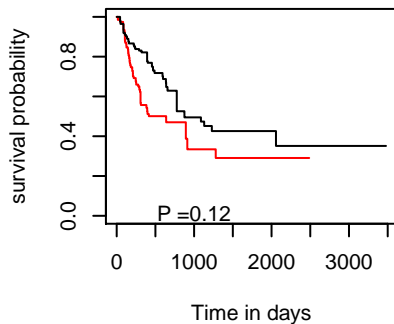**DFI hsa-mir-4326**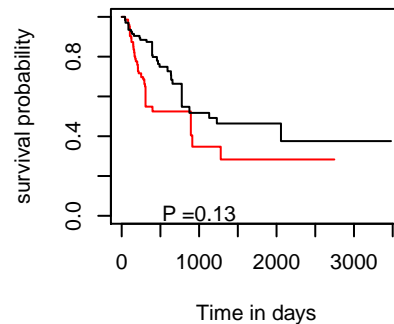**DSS hsa-mir-4326**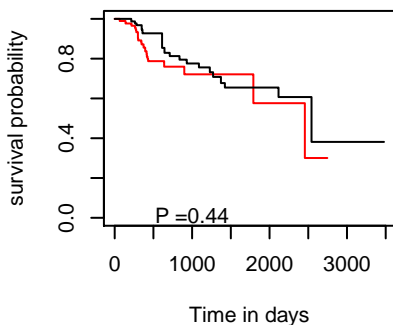**OS hsa-mir-4739**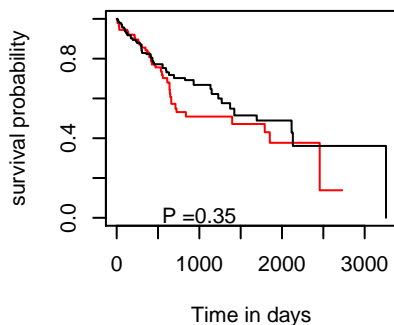**PFI hsa-mir-4739**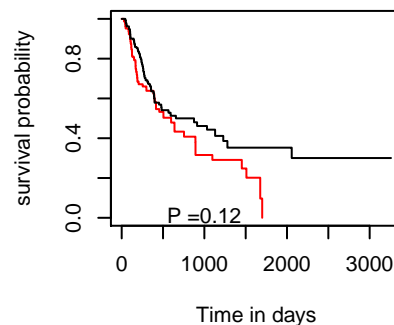**DFI hsa-mir-4739**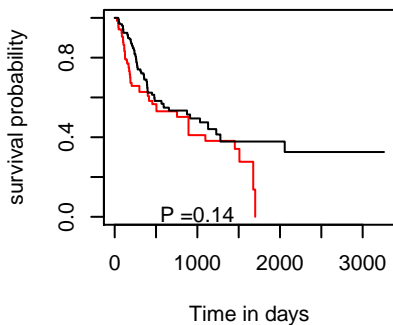**DSS hsa-mir-4739**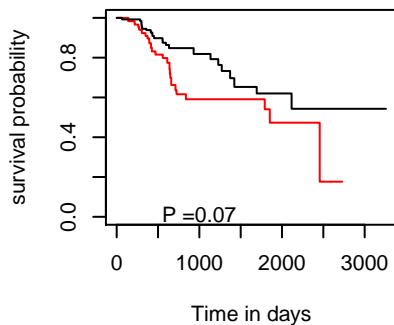**OS hsa-mir-548k**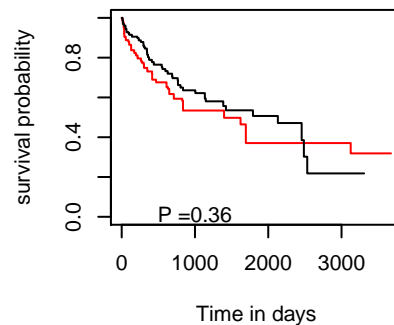

**PFI hsa-mir-548k**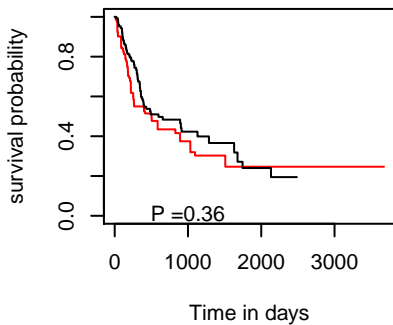**DFI hsa-mir-548k**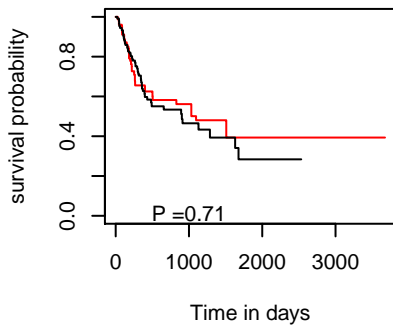**DSS hsa-mir-548k**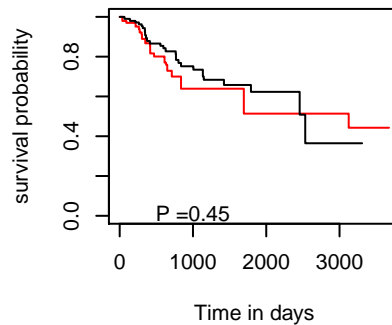**OS hsa-mir-6860**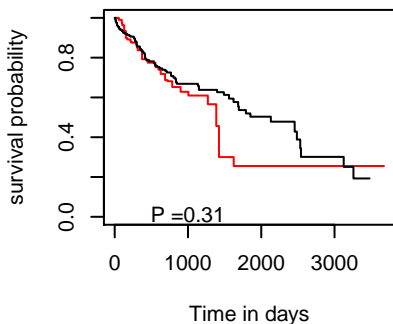**PFI hsa-mir-6860**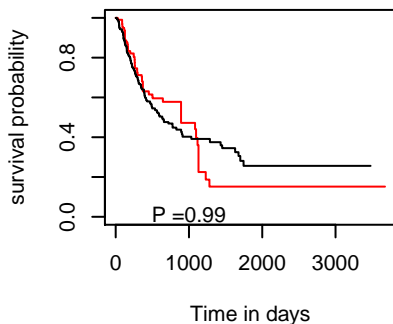**DFI hsa-mir-6860**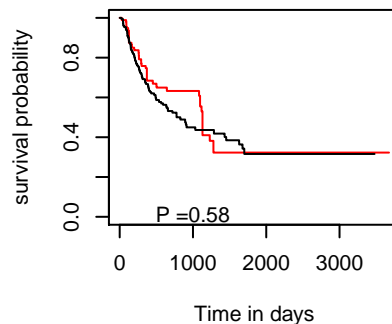**DSS hsa-mir-6860**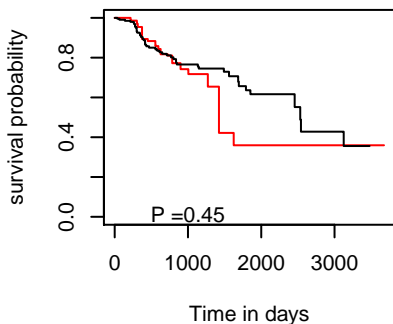**OS hsa-mir-4762**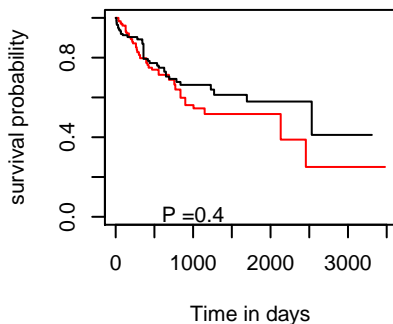**PFI hsa-mir-4762**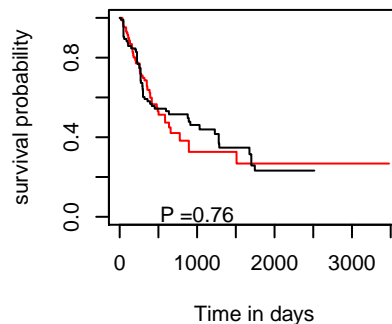

**DFI hsa-mir-4762**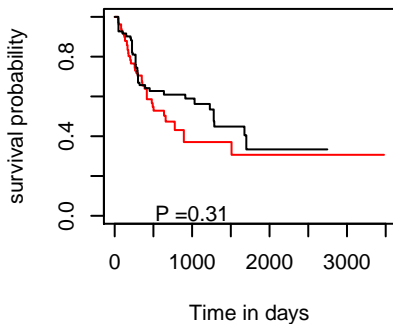**DSS hsa-mir-4762**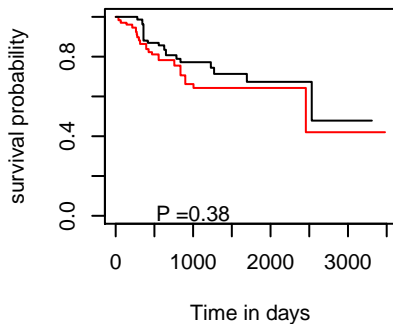**OS hsa-mir-3664**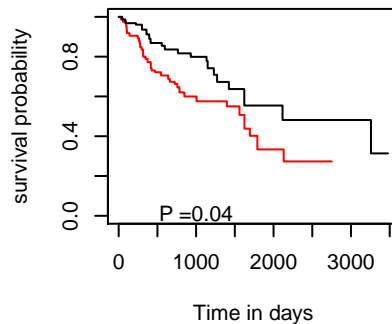**PFI hsa-mir-3664**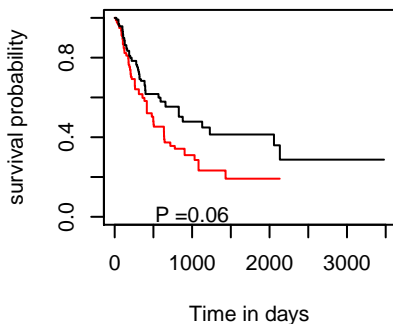**DFI hsa-mir-3664**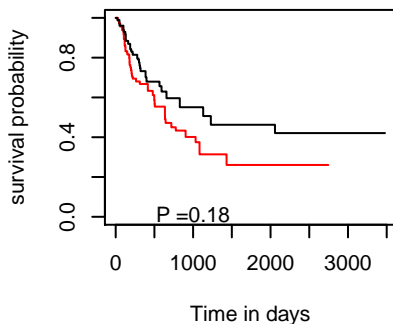**DSS hsa-mir-3664**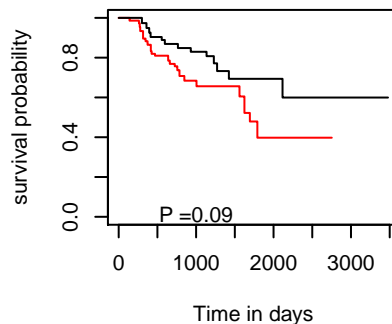**OS hsa-mir-149**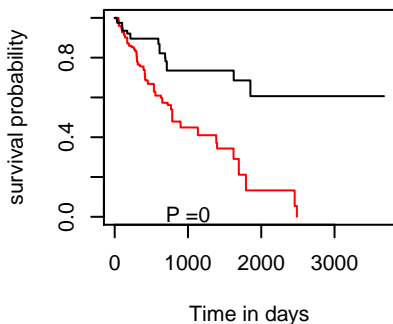**PFI hsa-mir-149**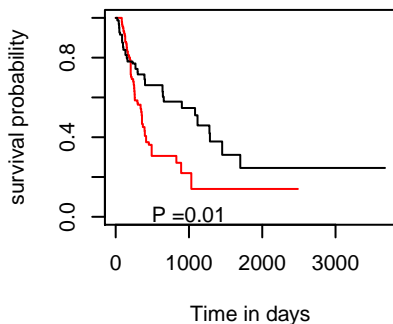**DFI hsa-mir-149**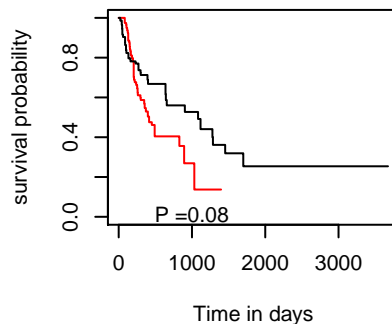

**DSS hsa-mir-149**

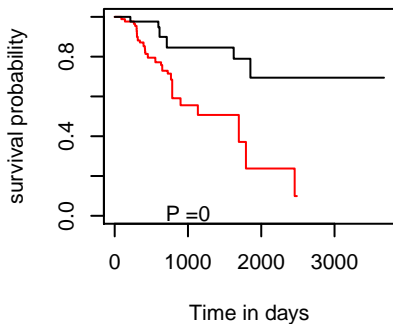

**OS hsa-mir-4466**

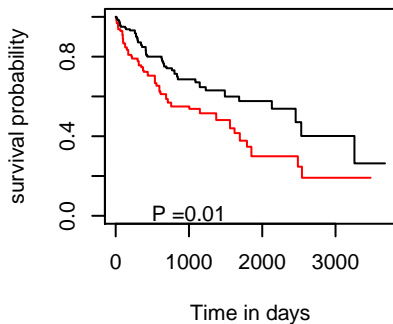

**PFI hsa-mir-4466**

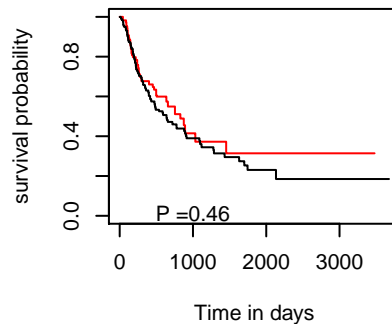

**DFI hsa-mir-4466**

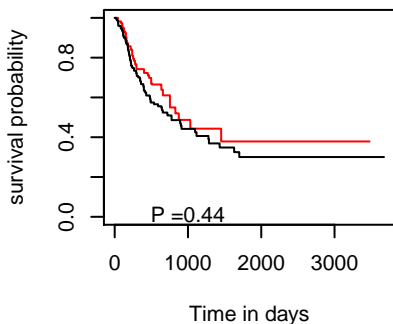

**DSS hsa-mir-4466**

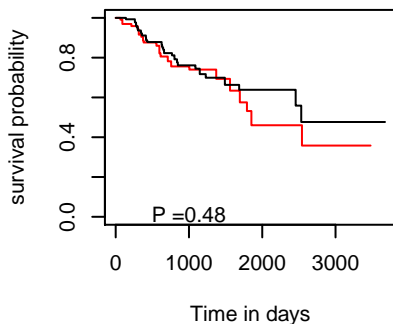

**OS hsa-mir-3187**

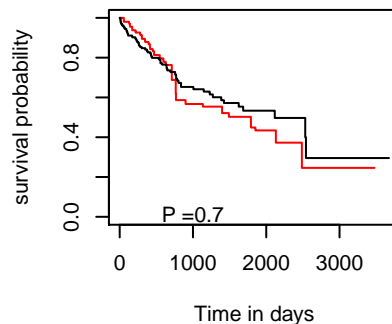

**PFI hsa-mir-3187**

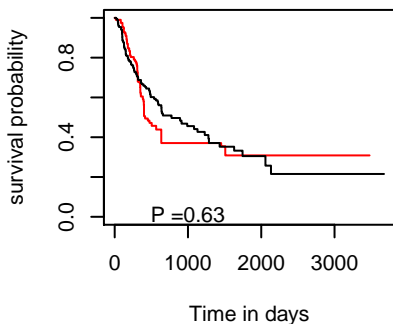

**DFI hsa-mir-3187**

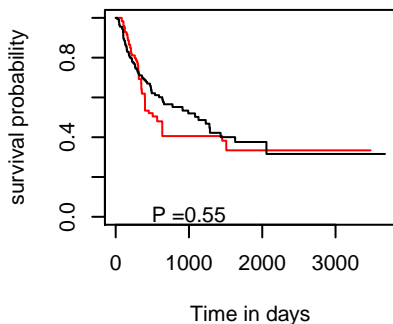

**DSS hsa-mir-3187**

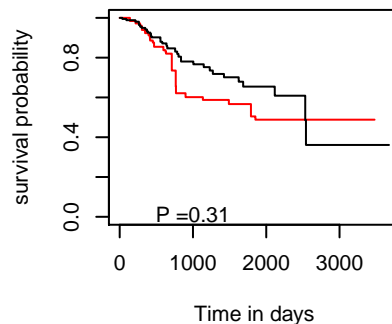

**OS hsa-mir-4745**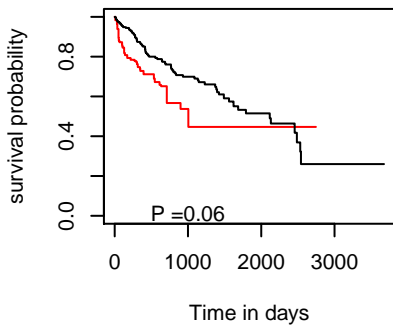**PFI hsa-mir-4745**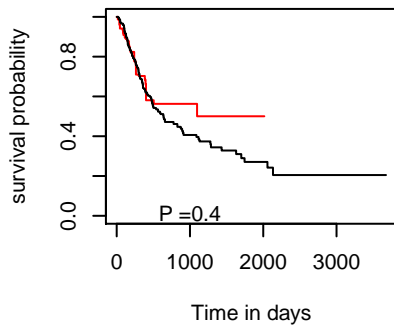**DFI hsa-mir-4745**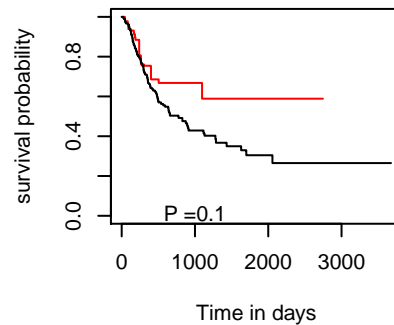**DSS hsa-mir-4745**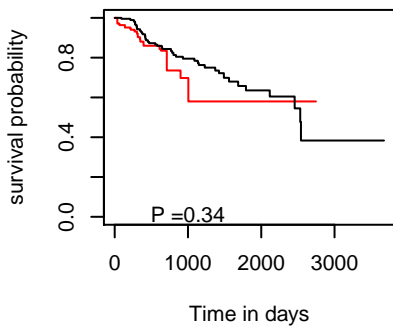**OS hsa-mir-4746**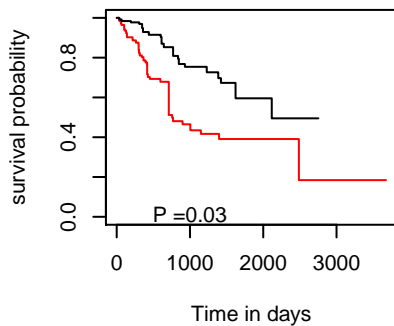**PFI hsa-mir-4746**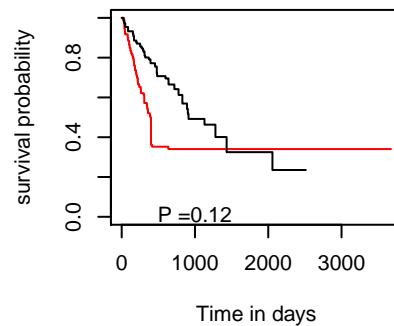**DFI hsa-mir-4746**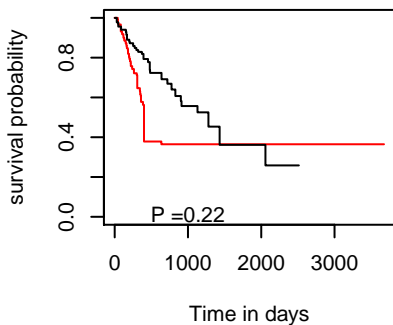**DSS hsa-mir-4746**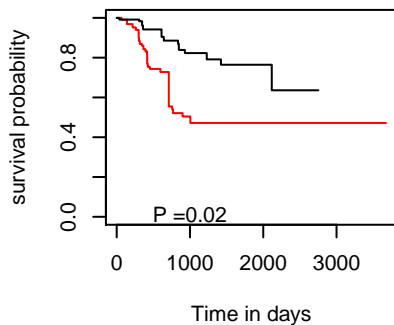**OS hsa-mir-31**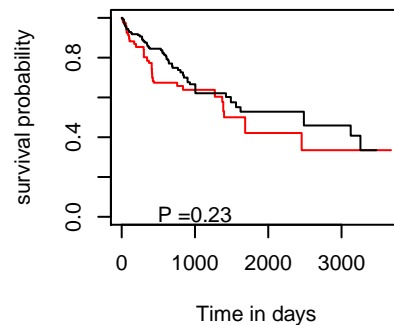

**PFI hsa-mir-31**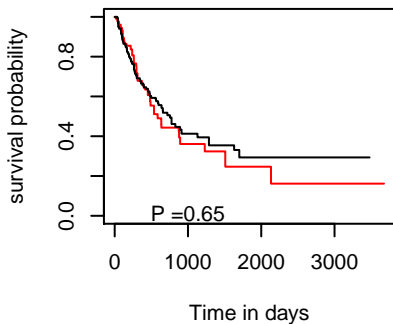**DFI hsa-mir-31**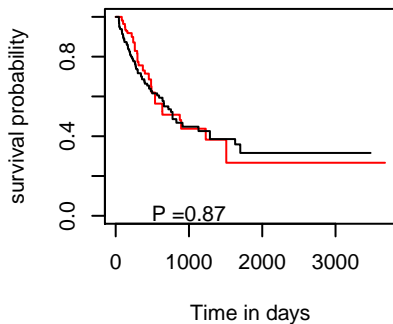**DSS hsa-mir-31**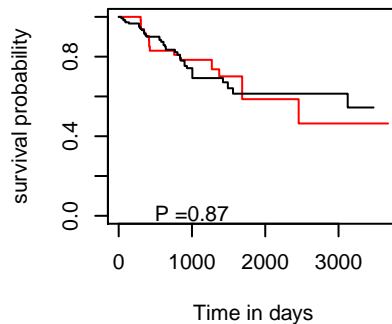**OS hsa-mir-6720**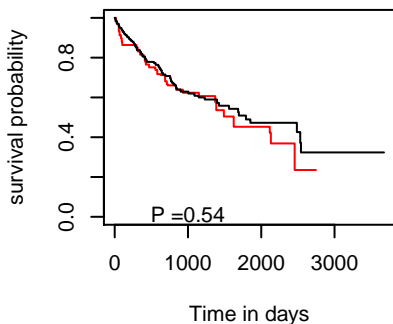**PFI hsa-mir-6720**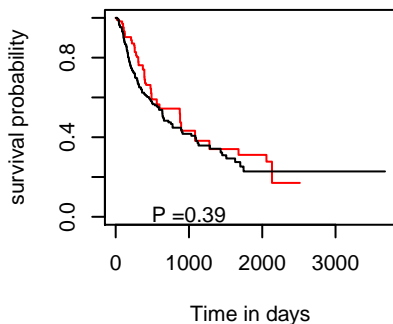**DFI hsa-mir-6720**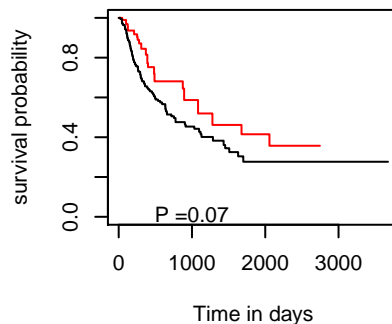**DSS hsa-mir-6720**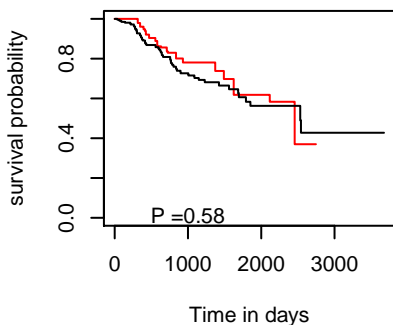**OS hsa-mir-340**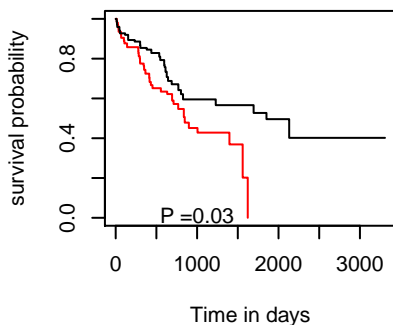**PFI hsa-mir-340**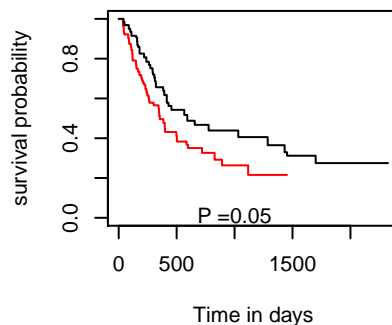

**DFI hsa-mir-340**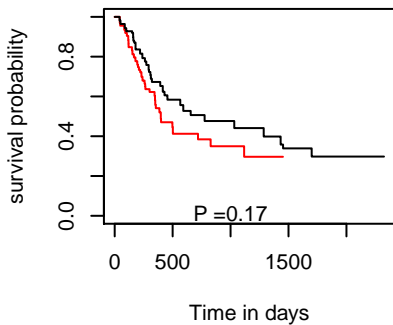**DSS hsa-mir-340**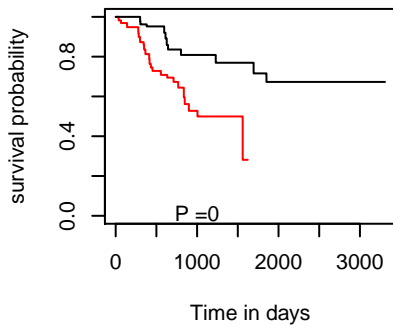**OS hsa-mir-1307**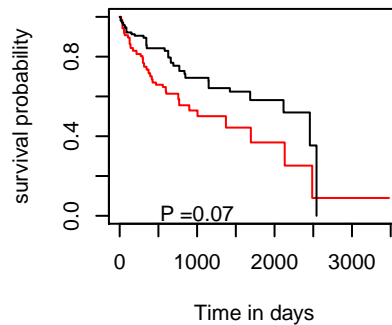**PFI hsa-mir-1307**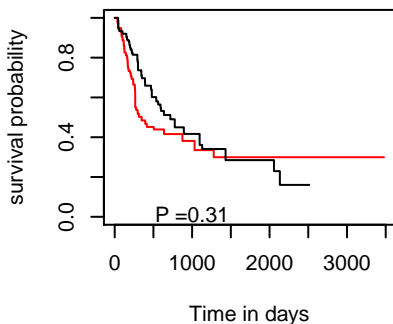**DFI hsa-mir-1307**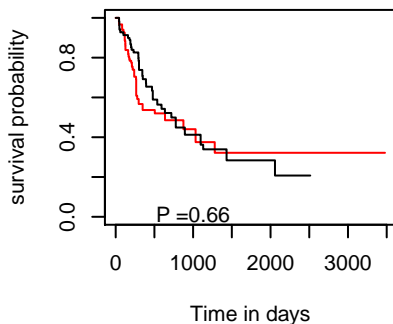**DSS hsa-mir-1307**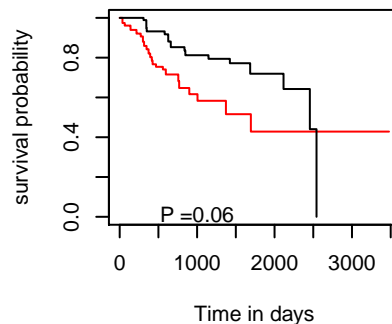**OS hsa-mir-653**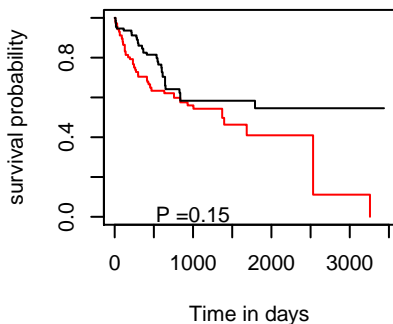**PFI hsa-mir-653**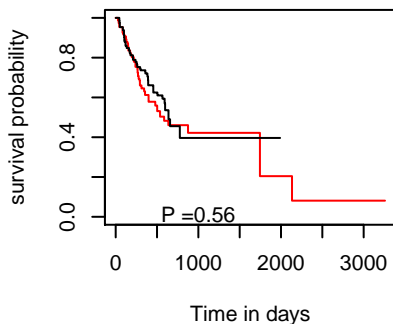**DFI hsa-mir-653**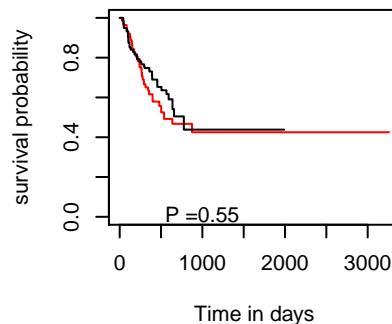

**DSS hsa-mir-653**

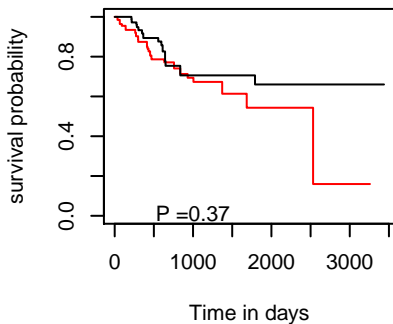

**OS hsa-mir-3170**

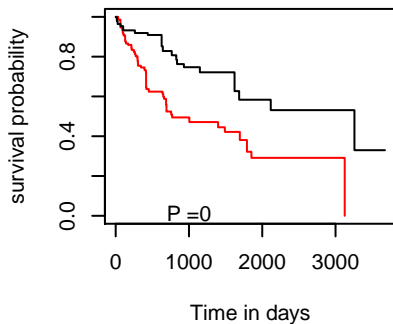

**PFI hsa-mir-3170**

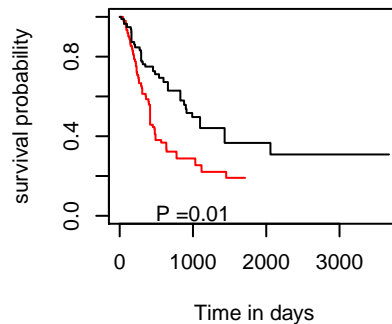

**DFI hsa-mir-3170**

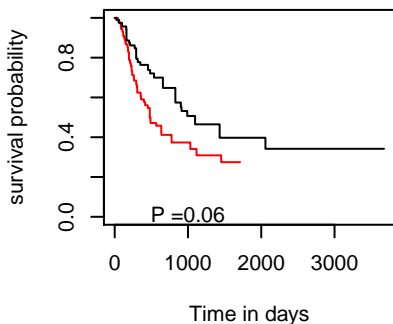

**DSS hsa-mir-3170**

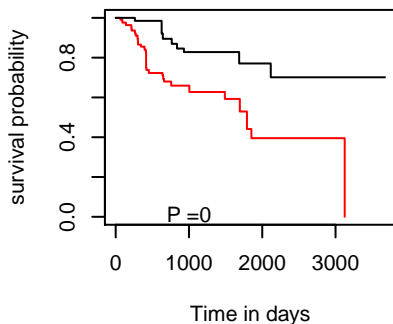

**OS hsa-mir-4705**

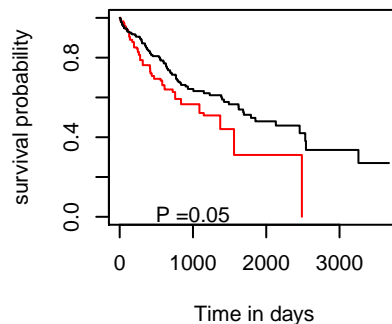

**PFI hsa-mir-4705**

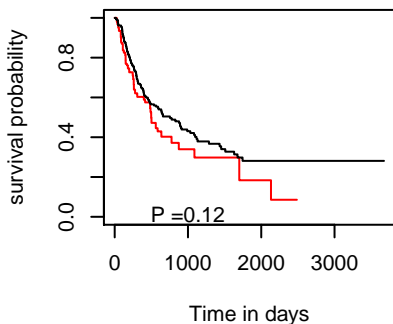

**DFI hsa-mir-4705**

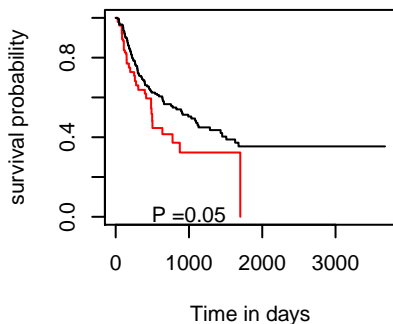

**DSS hsa-mir-4705**

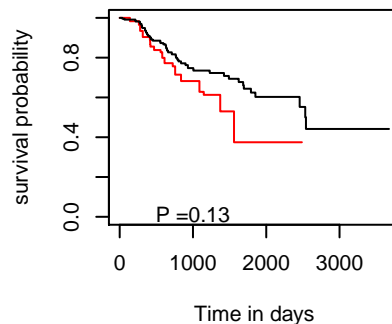

**OS hsa-mir-19b-1**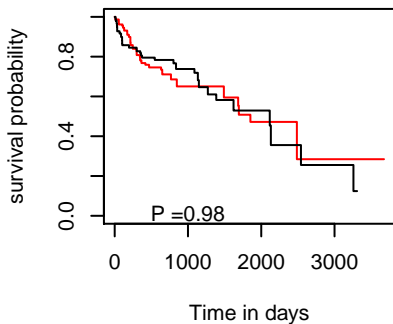**PFI hsa-mir-19b-1**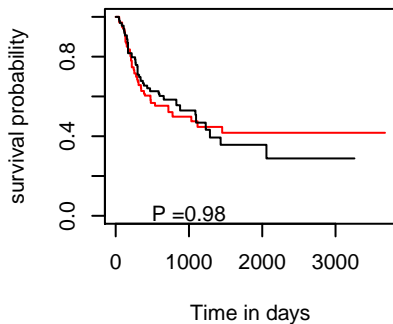**DFI hsa-mir-19b-1**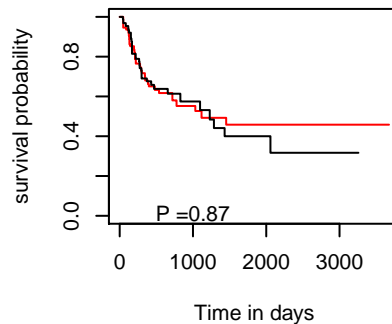**DSS hsa-mir-19b-1**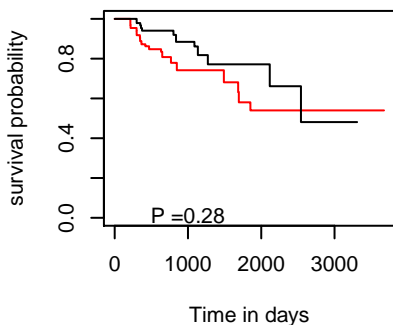**OS hsa-let-7b**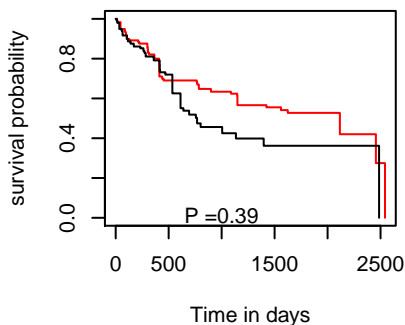**PFI hsa-let-7b**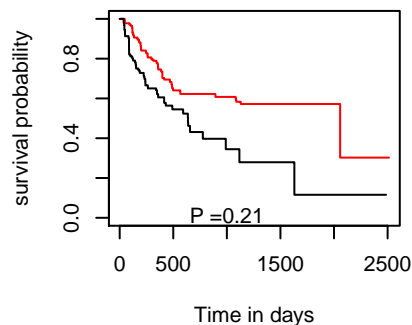**DFI hsa-let-7b**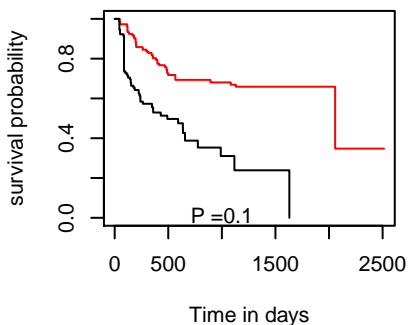**DSS hsa-let-7b**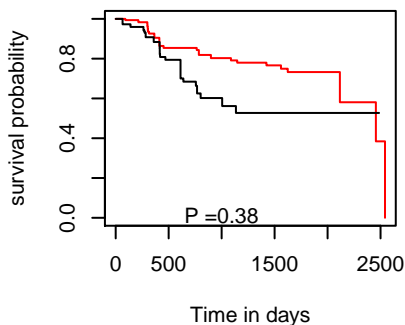**OS hsa-mir-3619**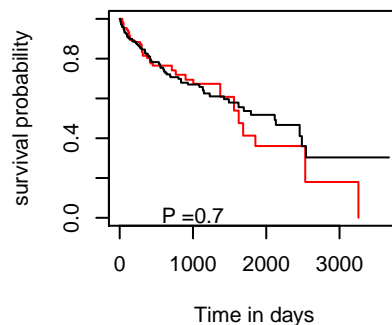

**PFI hsa-mir-3619**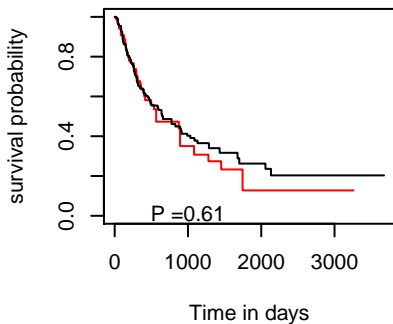**DFI hsa-mir-3619**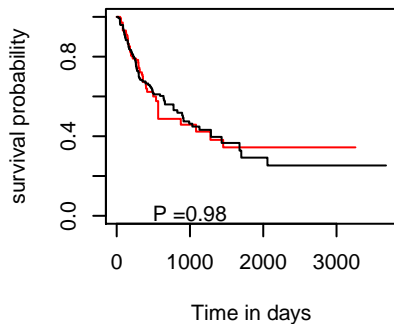**DSS hsa-mir-3619**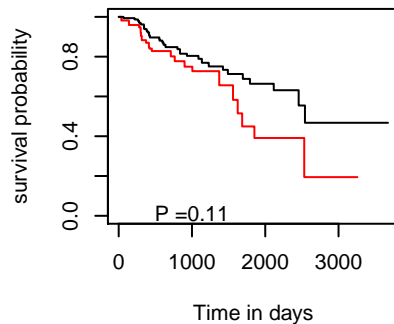**OS hsa-mir-4777**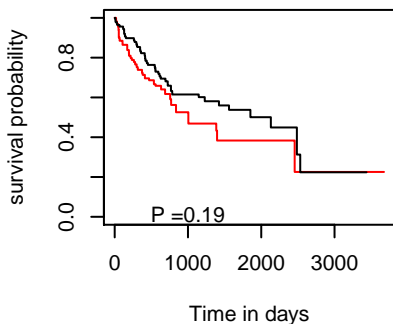**PFI hsa-mir-4777**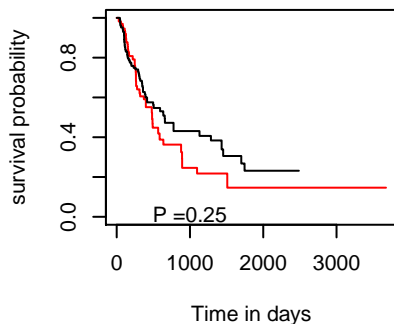**DFI hsa-mir-4777**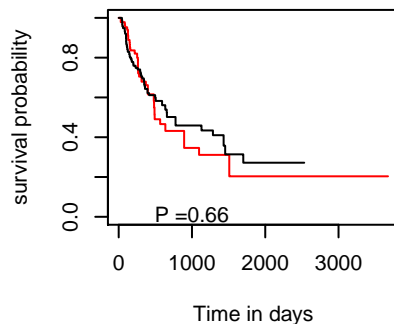**DSS hsa-mir-4777**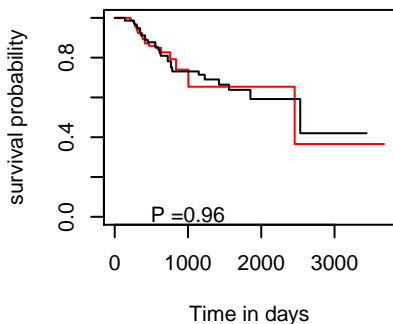**OS hsa-mir-489**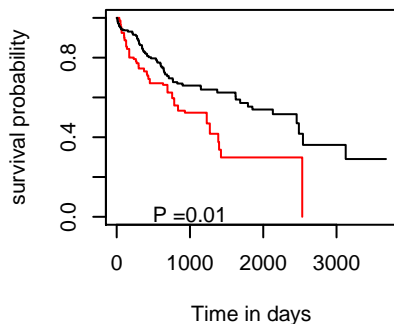**PFI hsa-mir-489**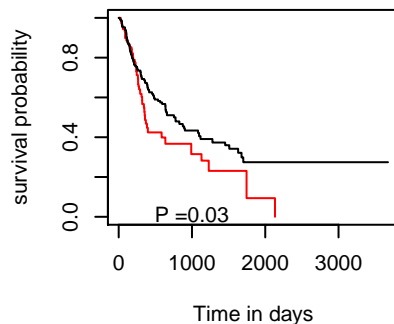

**DFI hsa-mir-489**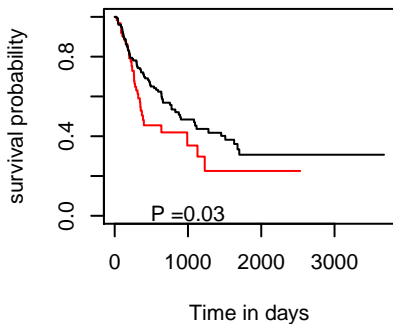**DSS hsa-mir-489**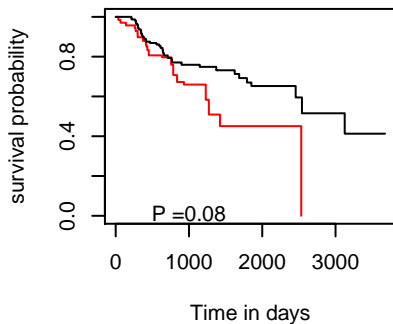**OS hsa-mir-5683**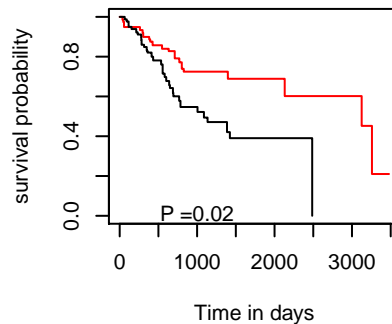**PFI hsa-mir-5683**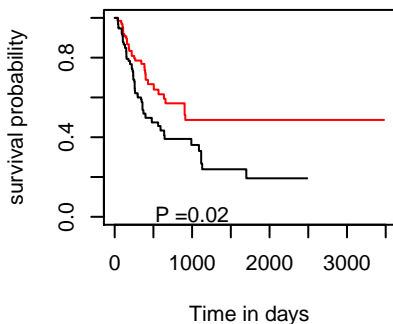**DFI hsa-mir-5683**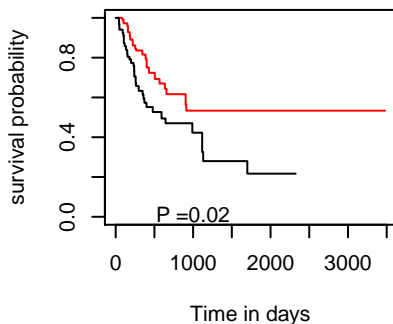**DSS hsa-mir-5683**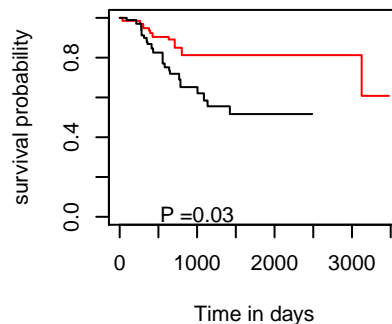**OS hsa-mir-181a-1**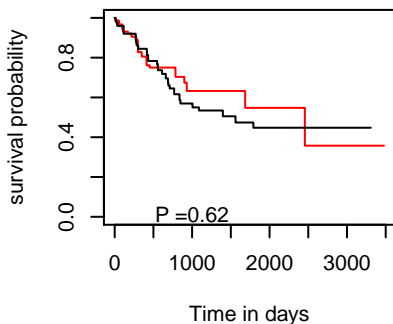**PFI hsa-mir-181a-1**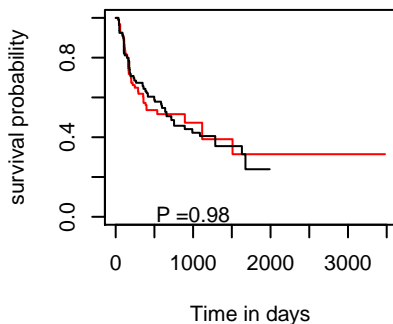**DFI hsa-mir-181a-1**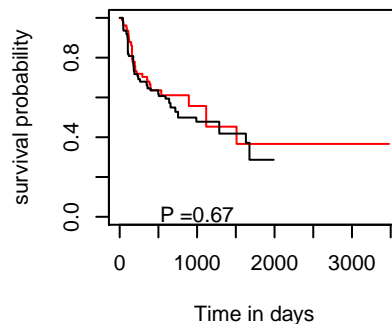

**DSS hsa-mir-181a-1**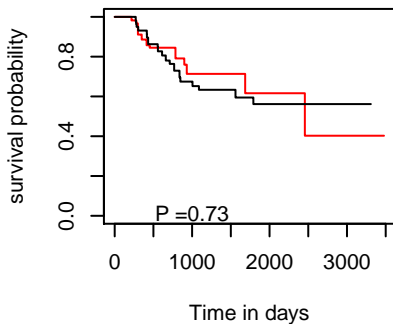**OS hsa-mir-3176**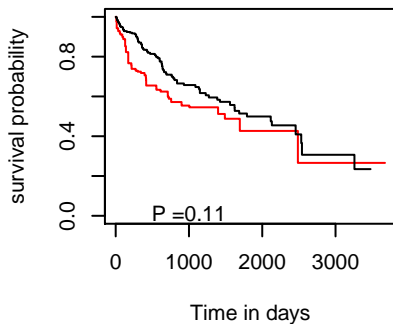**PFI hsa-mir-3176**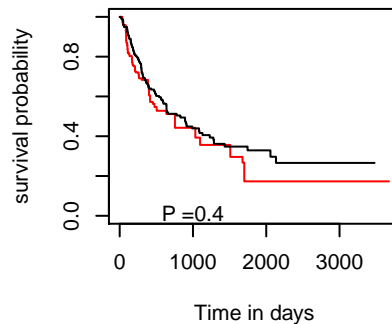**DFI hsa-mir-3176**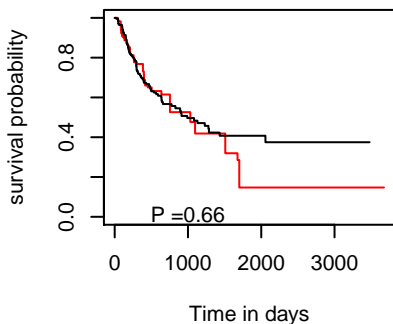**DSS hsa-mir-3176**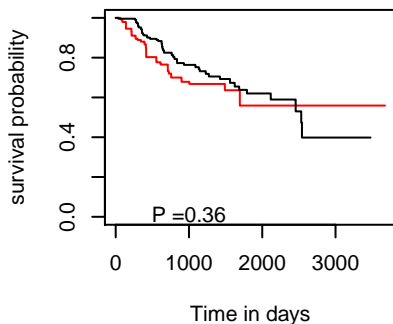**OS hsa-mir-378d-2**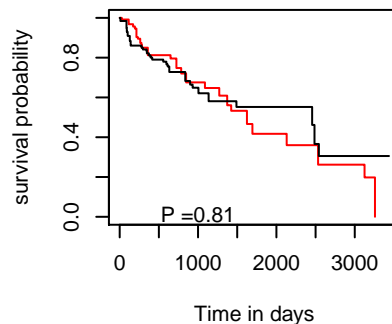**PFI hsa-mir-378d-2**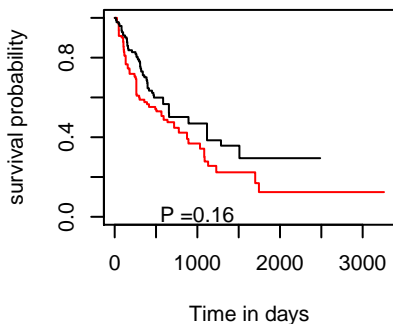**DFI hsa-mir-378d-2**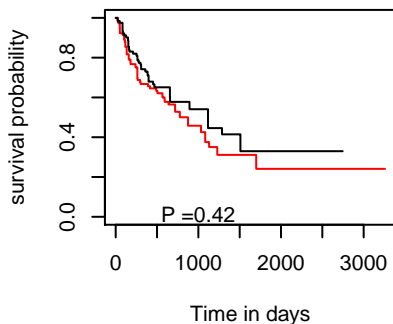**DSS hsa-mir-378d-2**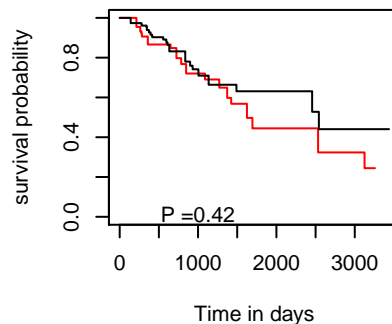

**OS hsa-mir-4645**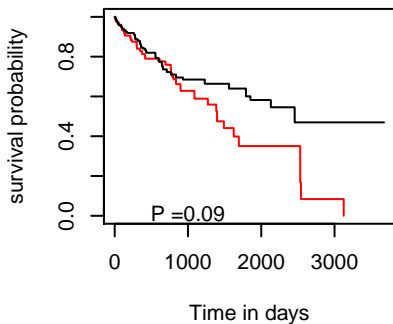**PFI hsa-mir-4645**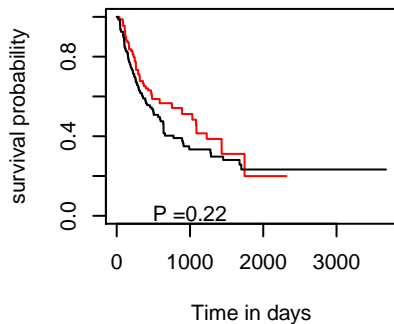**DFI hsa-mir-4645**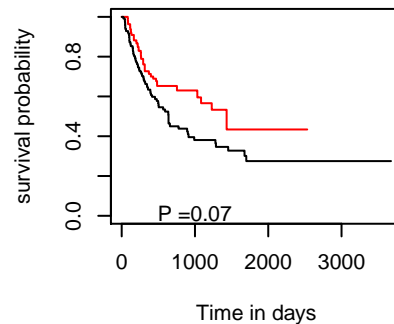**DSS hsa-mir-4645**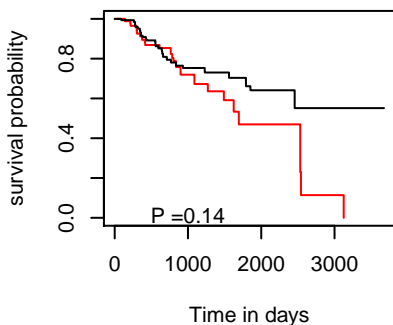**OS hsa-mir-132**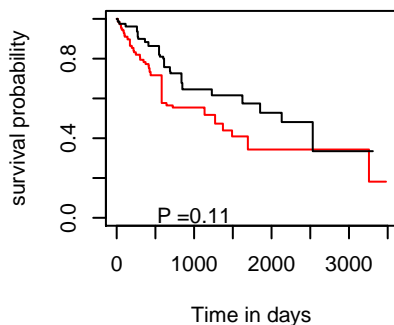**PFI hsa-mir-132**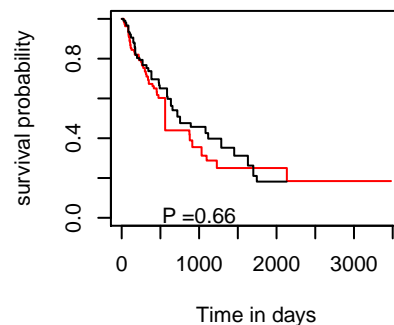**DFI hsa-mir-132**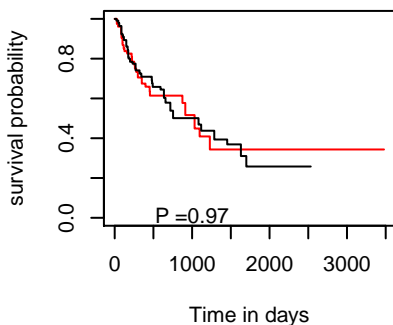**DSS hsa-mir-132**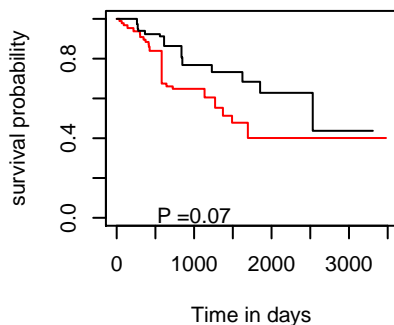**OS hsa-mir-22**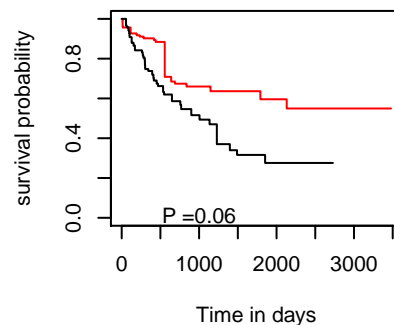



**DFI hsa-mir-4491**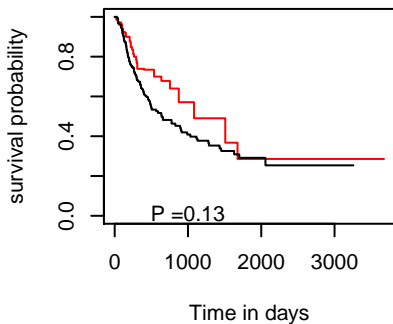**DSS hsa-mir-4491**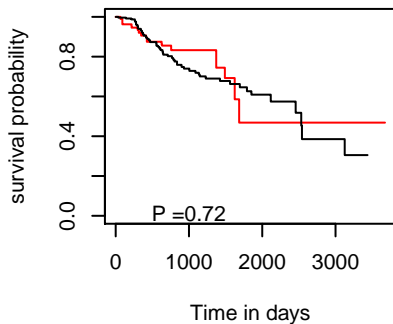**OS hsa-mir-4660**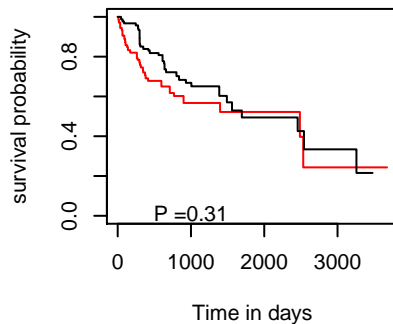**PFI hsa-mir-4660**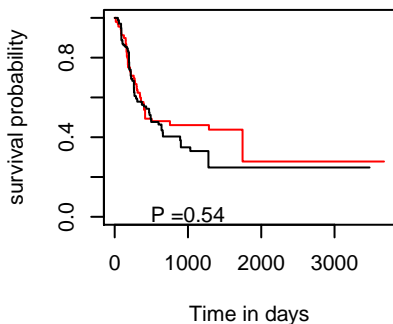**DFI hsa-mir-4660**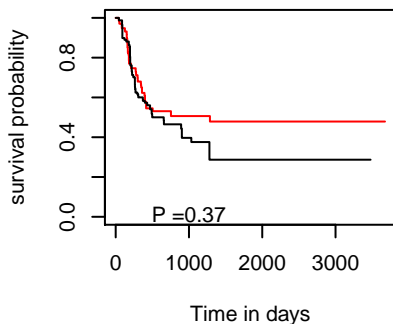**DSS hsa-mir-4660**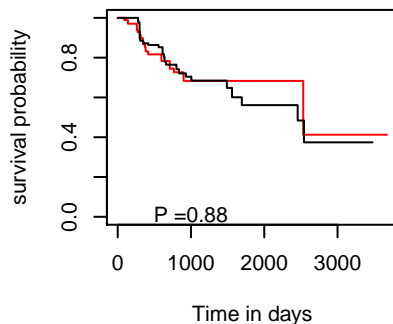**OS hsa-mir-203b**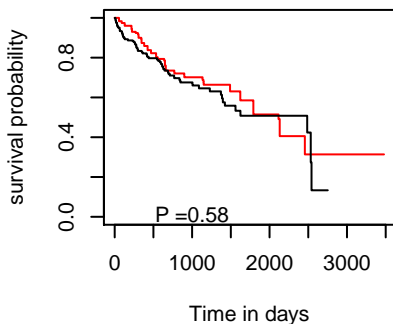**PFI hsa-mir-203b**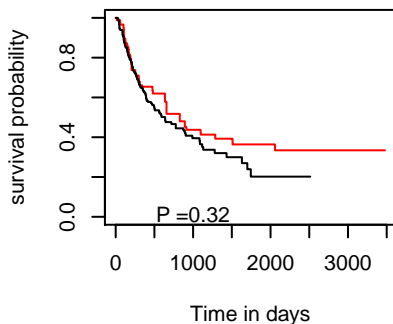**DFI hsa-mir-203b**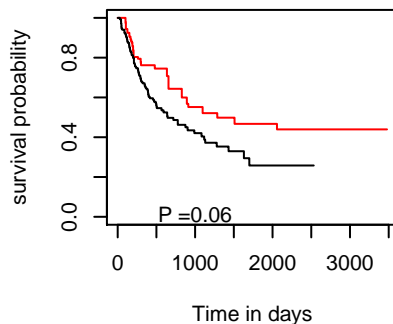

**DSS hsa-mir-203b**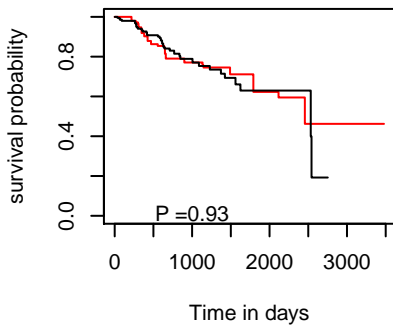**OS hsa-mir-7850**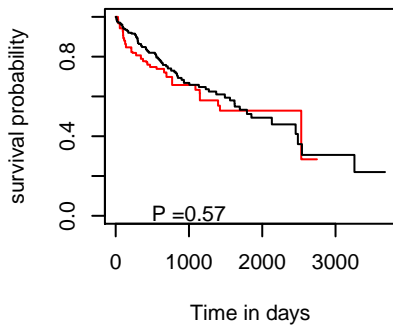**PFI hsa-mir-7850**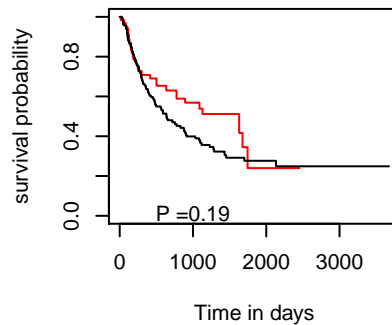**DFI hsa-mir-7850**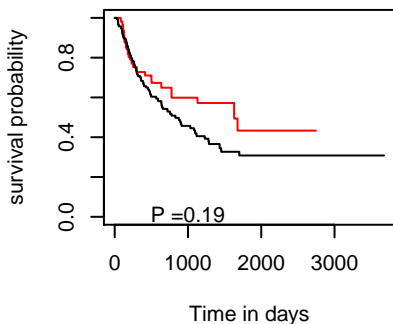**DSS hsa-mir-7850**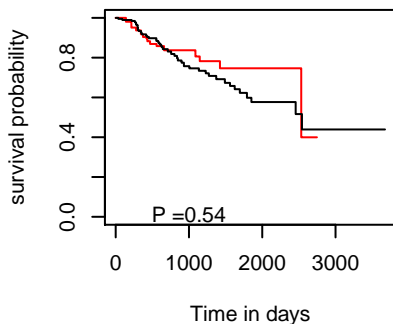**OS hsa-mir-4786**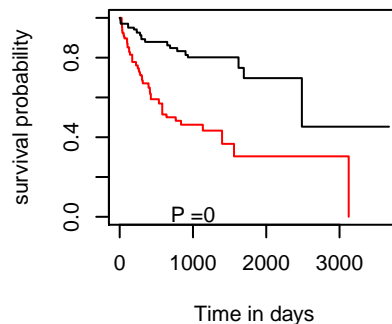**PFI hsa-mir-4786**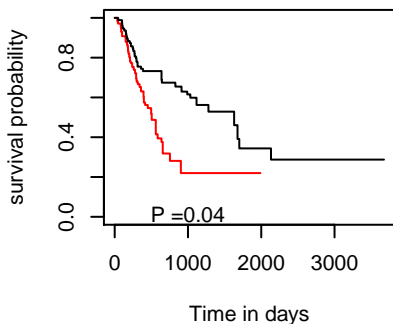**DFI hsa-mir-4786**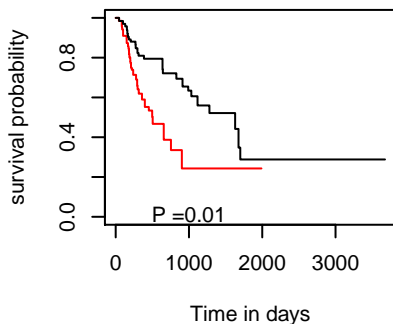**DSS hsa-mir-4786**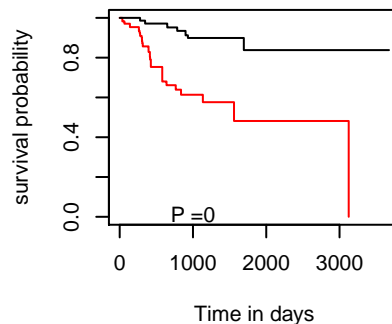

**OS hsa-mir-34b**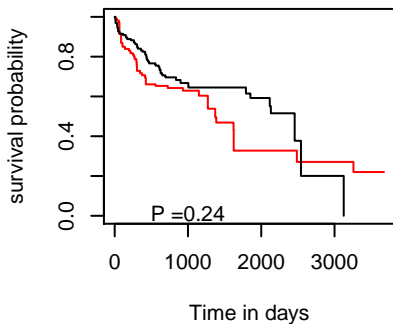**PFI hsa-mir-34b**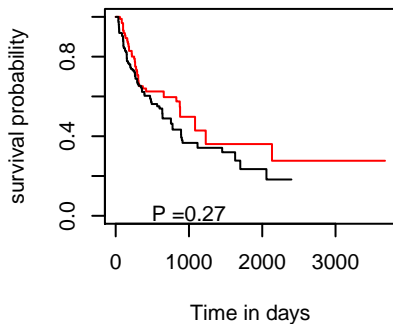**DFI hsa-mir-34b**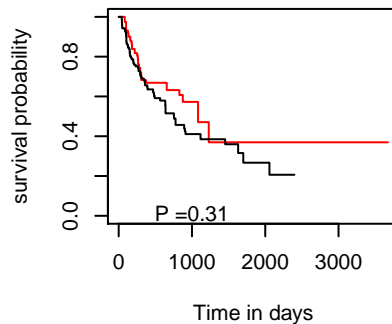**DSS hsa-mir-34b**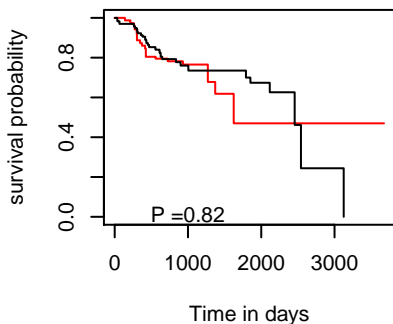**OS hsa-mir-100**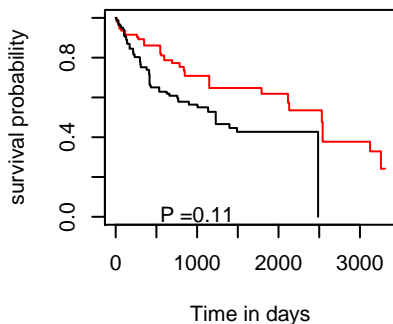**PFI hsa-mir-100**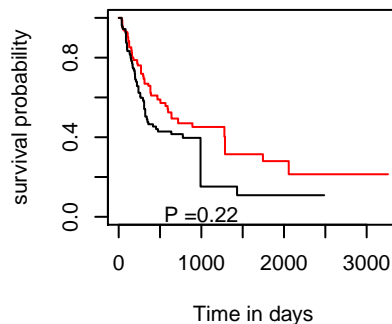**DFI hsa-mir-100**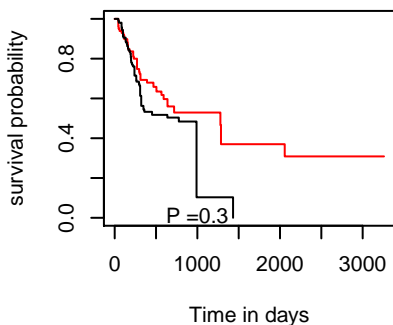**DSS hsa-mir-100**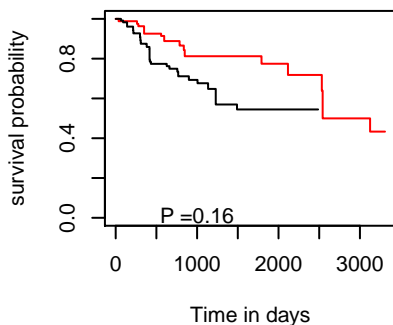**OS hsa-mir-7-3**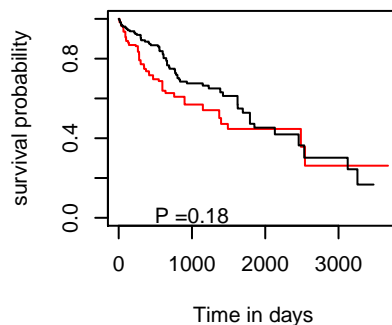

**PFI hsa-mir-7-3**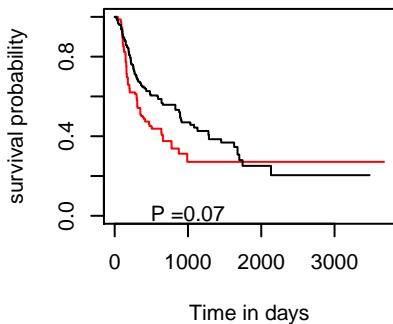**DFI hsa-mir-7-3**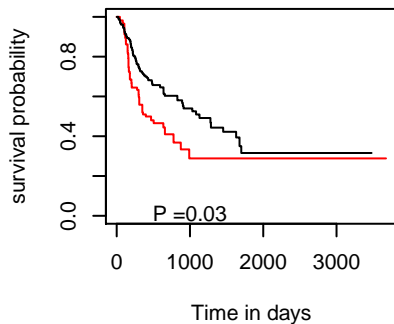**DSS hsa-mir-7-3**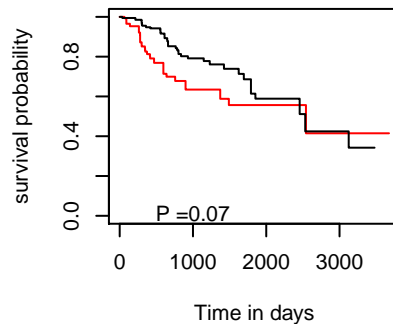**OS hsa-let-7a-3**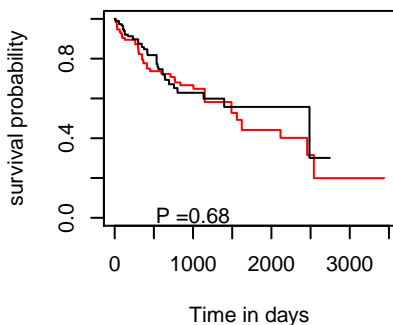**PFI hsa-let-7a-3**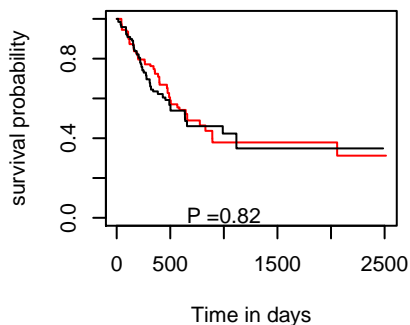**DFI hsa-let-7a-3**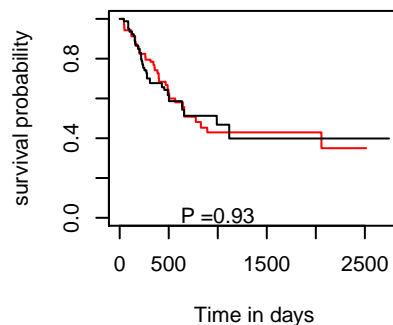**DSS hsa-let-7a-3**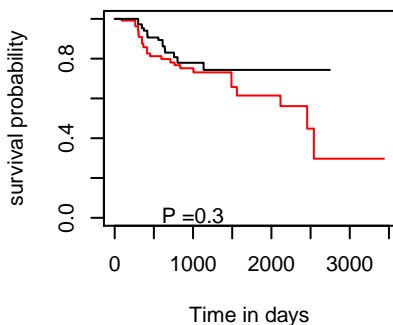**OS hsa-mir-4753**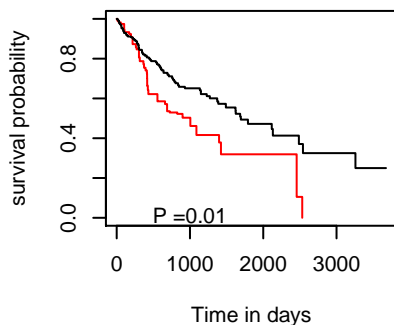**PFI hsa-mir-4753**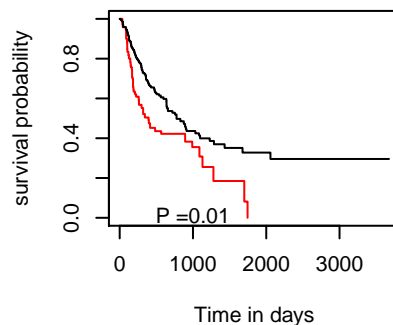

**DFI hsa-mir-4753**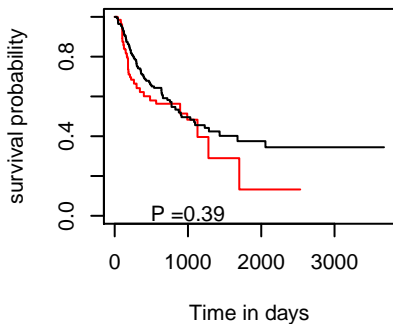**DSS hsa-mir-4753**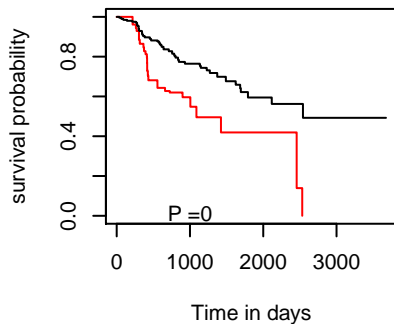**OS hsa-mir-548e**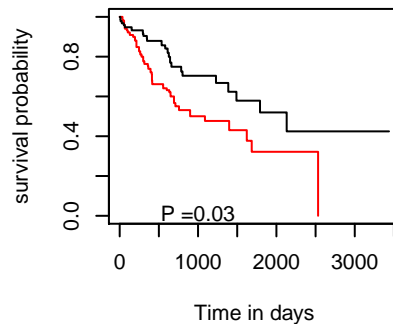**PFI hsa-mir-548e**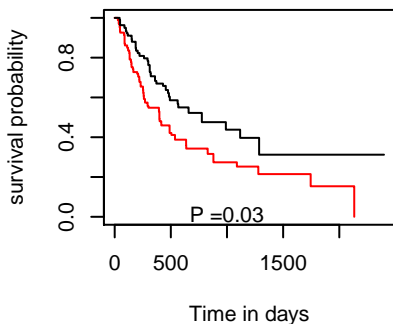**DFI hsa-mir-548e**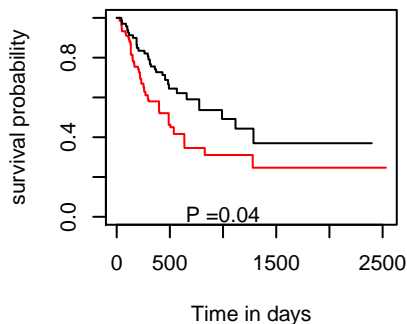**DSS hsa-mir-548e**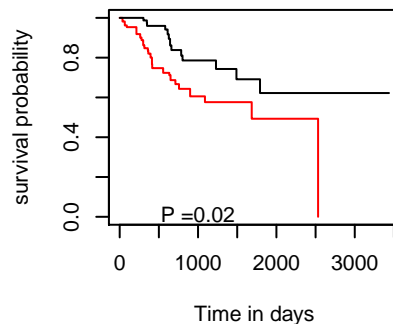**OS hsa-mir-6715a**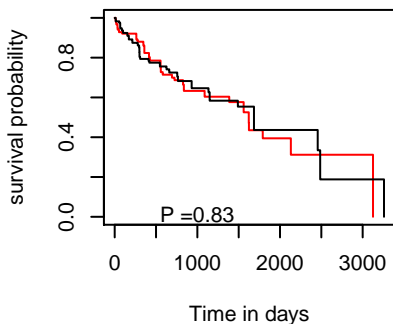**PFI hsa-mir-6715a**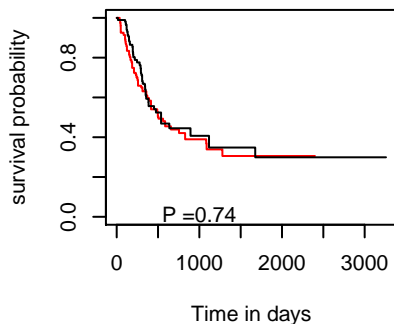**DFI hsa-mir-6715a**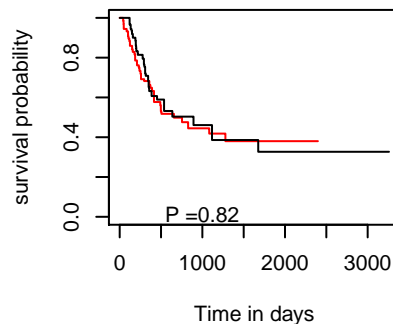

**DSS hsa-mir-6715a**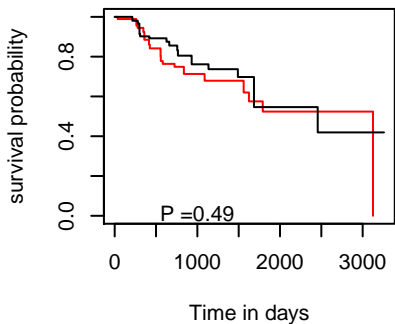**OS hsa-mir-383**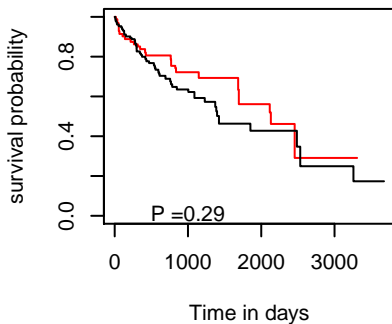**PFI hsa-mir-383**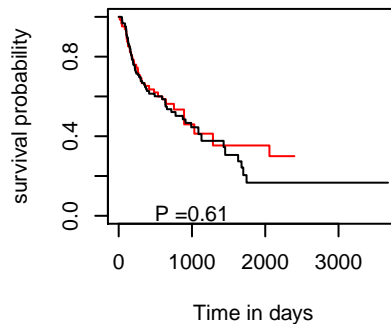**DFI hsa-mir-383**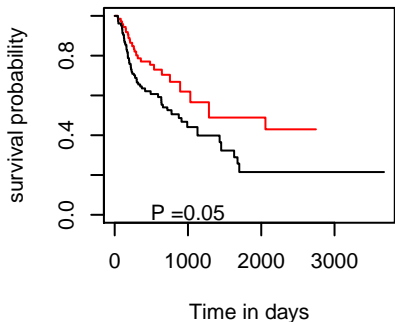**DSS hsa-mir-383**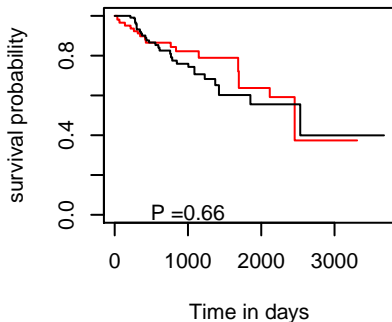**OS hsa-mir-1284**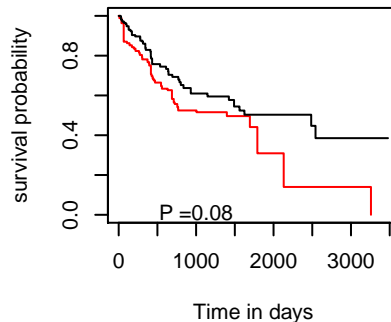**PFI hsa-mir-1284**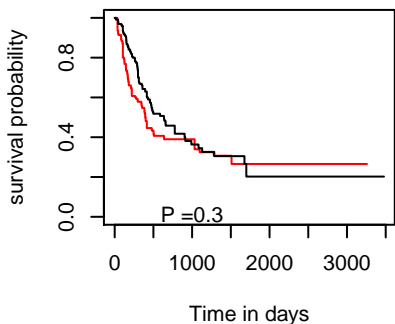**DFI hsa-mir-1284**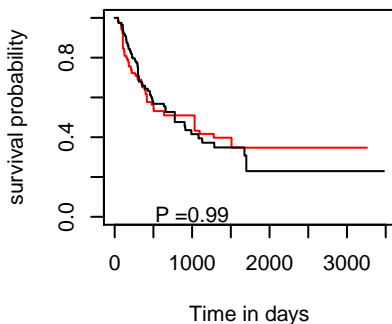**DSS hsa-mir-1284**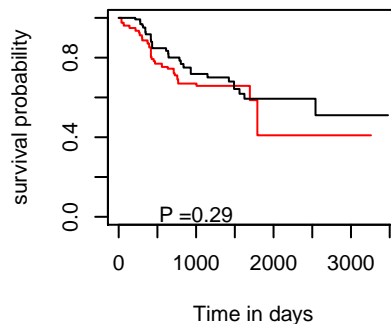

**OS hsa-mir-378c**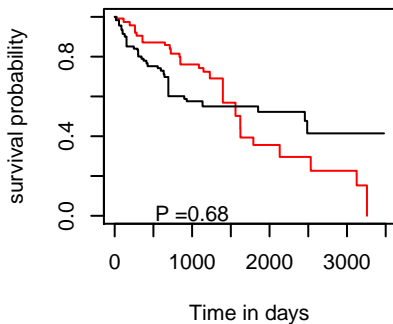**PFI hsa-mir-378c**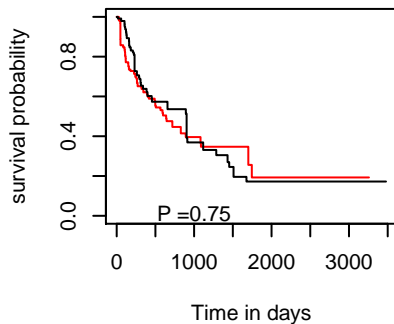**DFI hsa-mir-378c**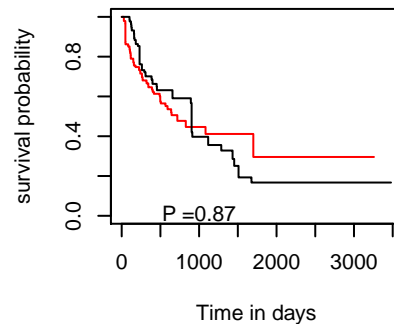**DSS hsa-mir-378c**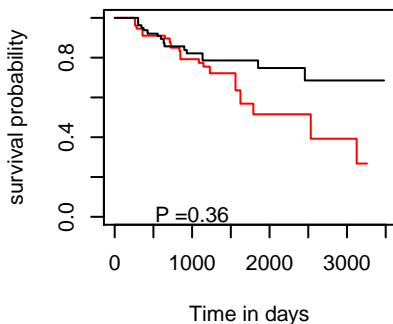**OS hsa-mir-1247**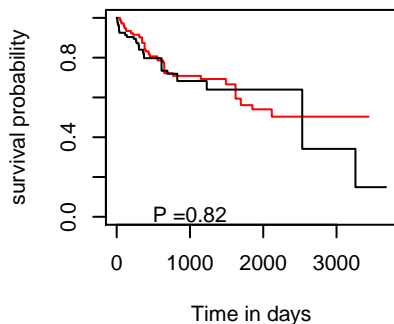**PFI hsa-mir-1247**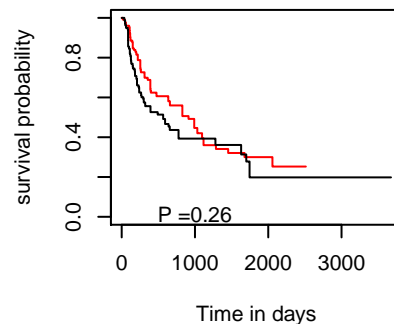**DFI hsa-mir-1247**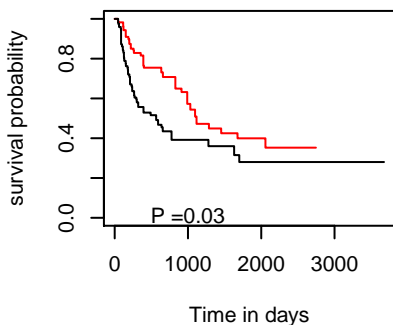**DSS hsa-mir-1247**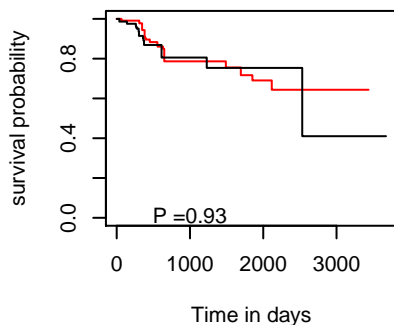**OS hsa-mir-17**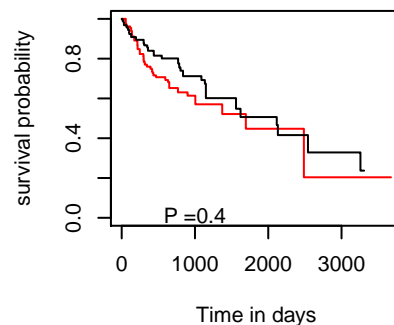



**DFI hsa-mir-3926-1**

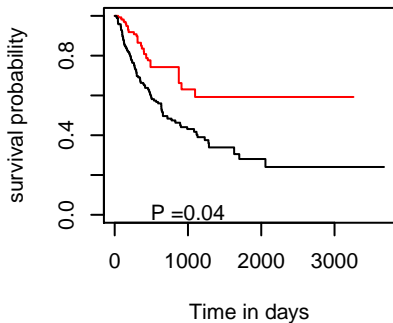

**DSS hsa-mir-3926-1**

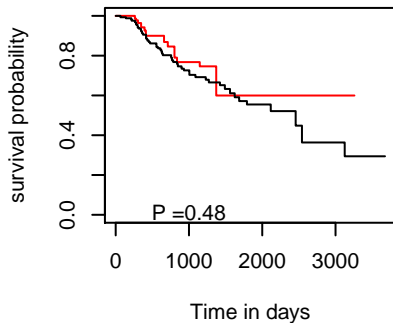

**OS hsa-mir-2110**

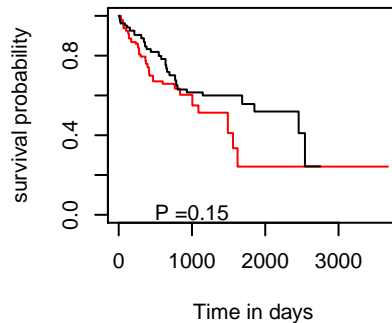

**PFI hsa-mir-2110**

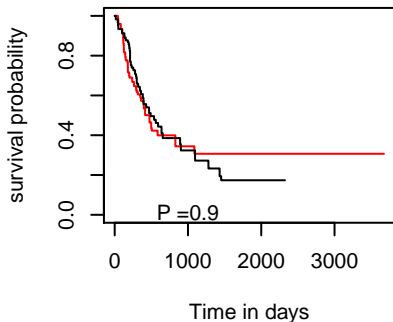

**DFI hsa-mir-2110**

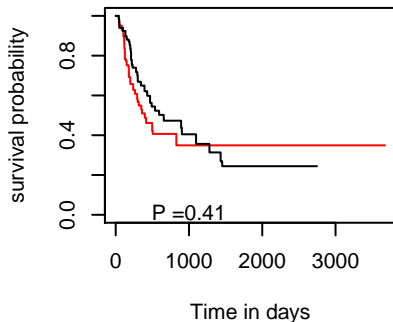

**DSS hsa-mir-2110**

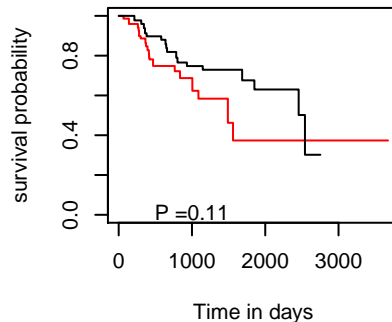

**OS hsa-mir-18a**

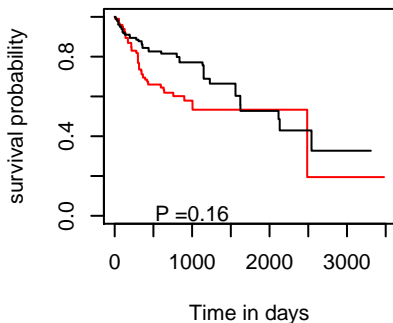

**PFI hsa-mir-18a**

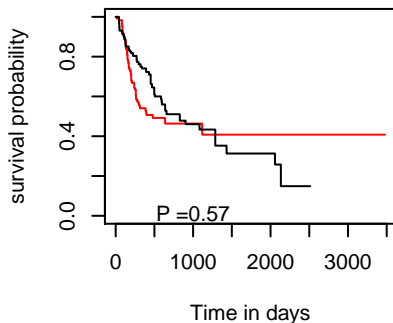

**DFI hsa-mir-18a**

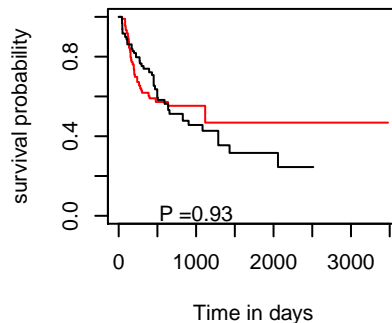

**DSS hsa-mir-18a**

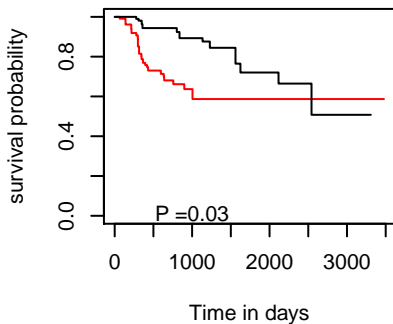

**OS hsa-mir-3678**

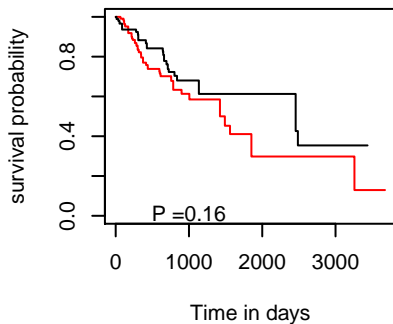

**PFI hsa-mir-3678**

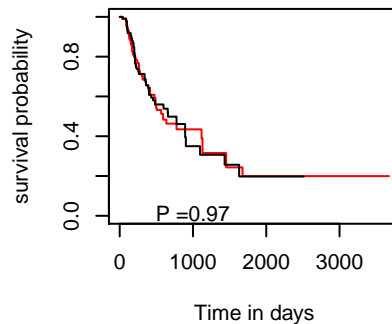

**DFI hsa-mir-3678**

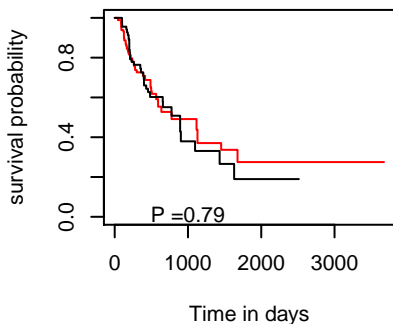

**DSS hsa-mir-3678**

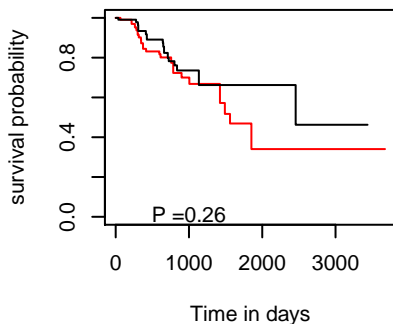

Supplement: MOESM20 [file 41598_2022_7628_MOESM20_ESM.pdf]
