# Supplementary material for: New Thinking on Read-Aloud.
Source: Springer Nature journal article supplement (doi:10.1038/s41598-022-07628-z), 2001-01-01

# Computing microRNA-gene interaction networks in pan-cancer using miRDriver

Banabithi Bose, Matthew Moravec, and Serdar Bozdog

# Supplemental Figure S12

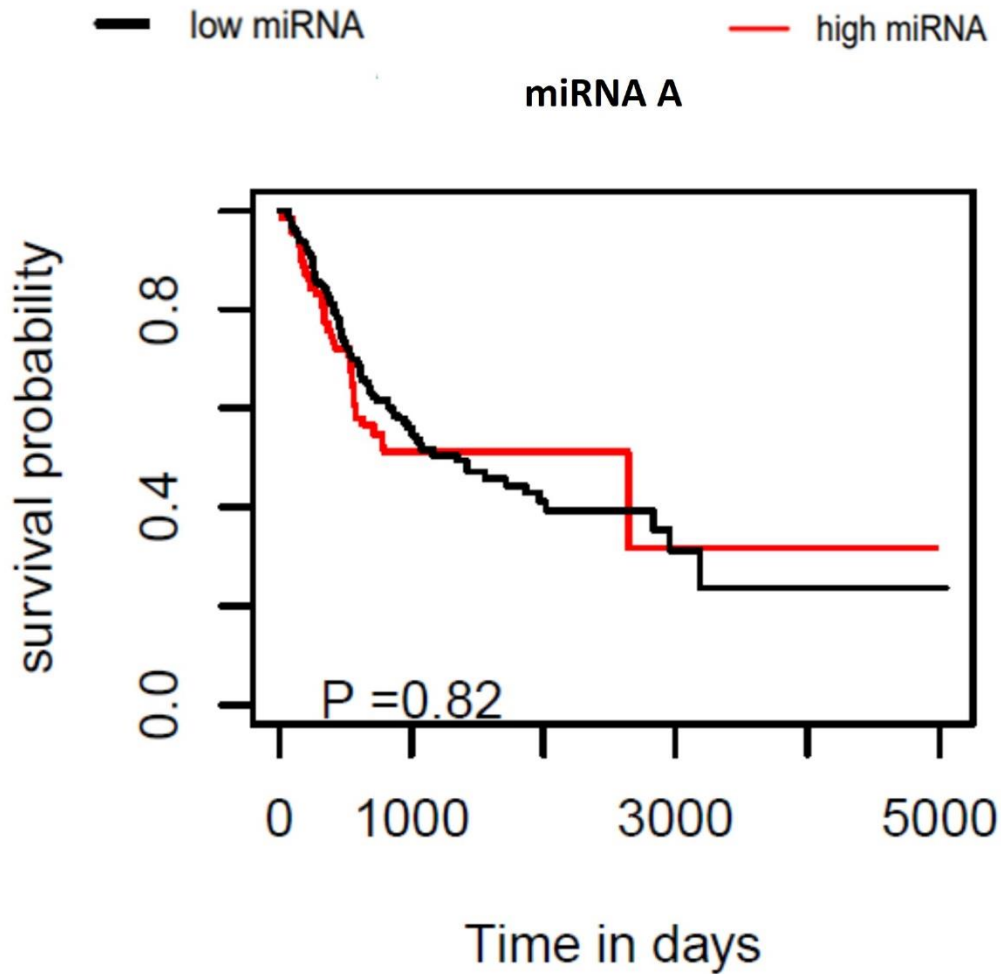

The *Adjusted Kaplan-Meier* survival plots for the computed miRNAs in high and low miRNA expression patient groups.

# Supplemental Figure S12

## Cancer Type: LUAD

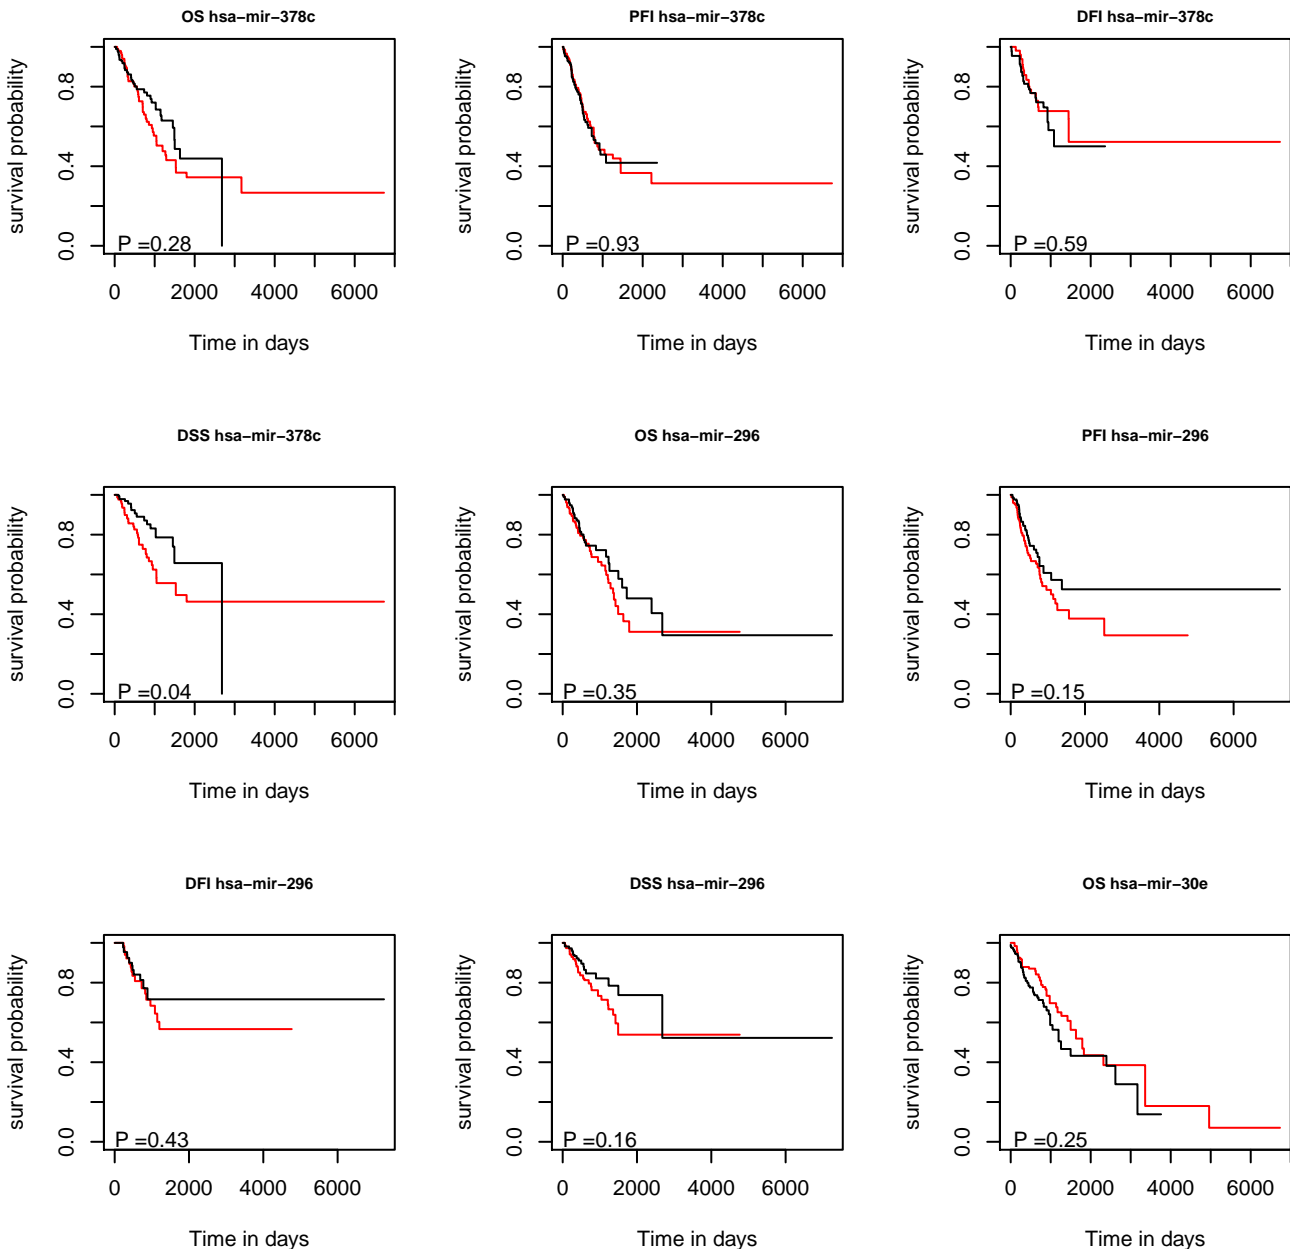

**PFI hsa-mir-30e**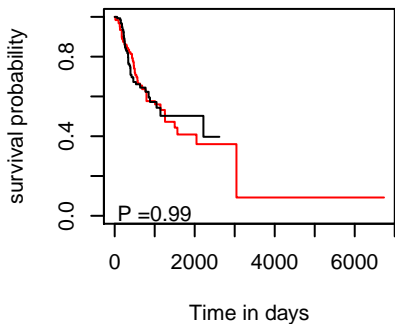**DFI hsa-mir-30e**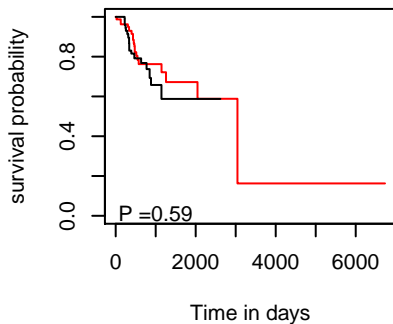**DSS hsa-mir-30e**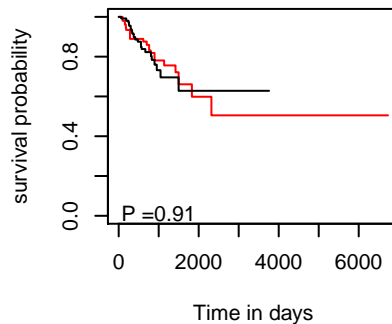**OS hsa-mir-3926-1**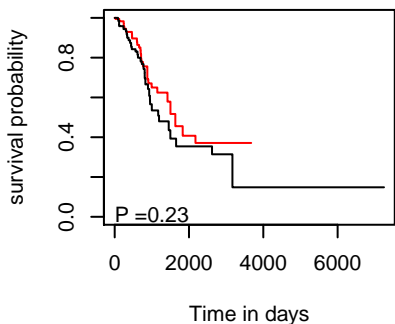**PFI hsa-mir-3926-1**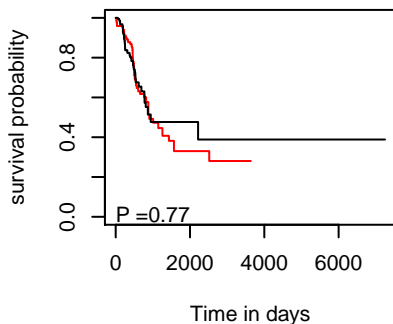**DFI hsa-mir-3926-1**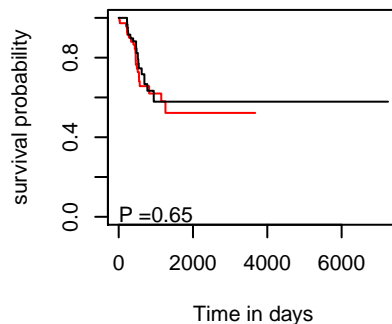**DSS hsa-mir-3926-1**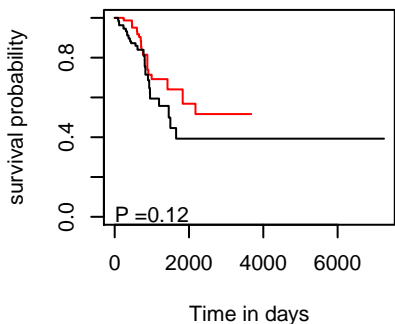**OS hsa-mir-4454**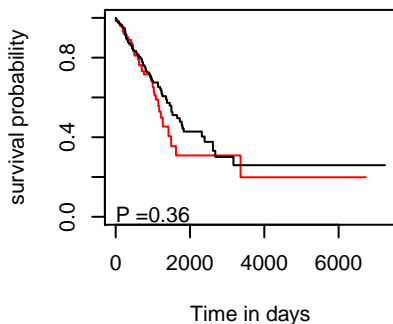**PFI hsa-mir-4454**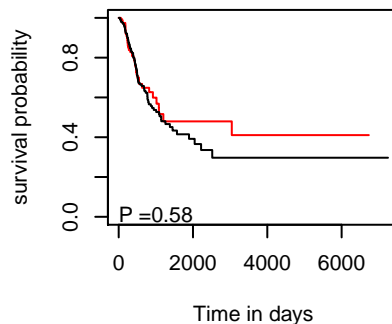

**DFI hsa-mir-4454**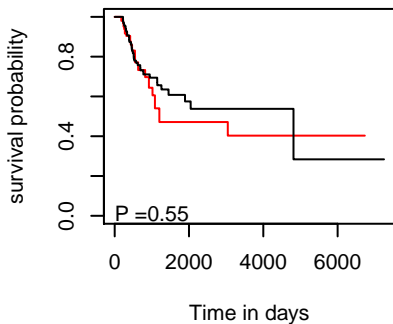**DSS hsa-mir-4454**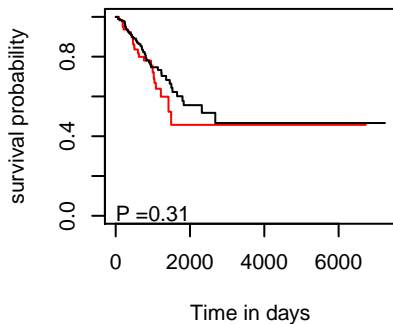**OS hsa-mir-4491**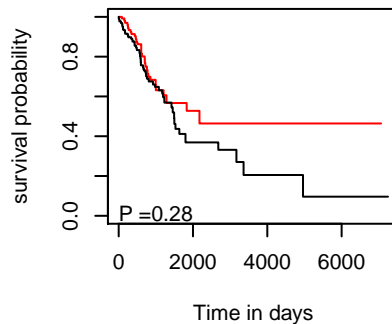**PFI hsa-mir-4491**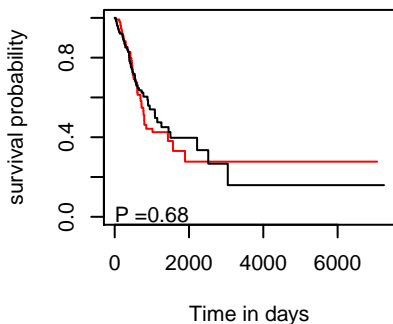**DFI hsa-mir-4491**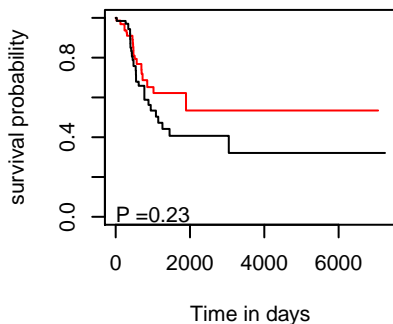**DSS hsa-mir-4491**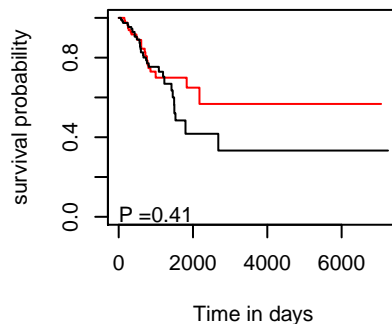**OS hsa-mir-4746**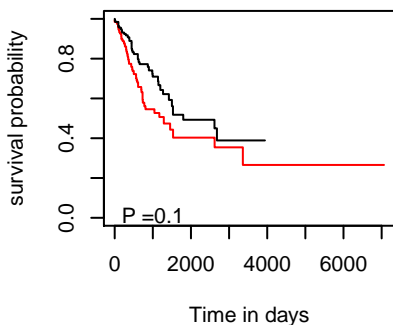**PFI hsa-mir-4746**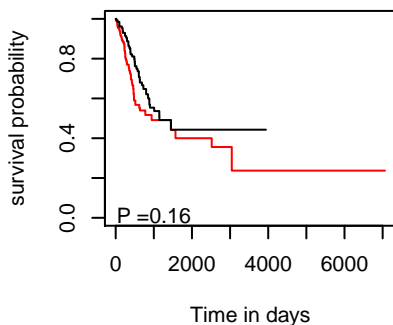**DFI hsa-mir-4746**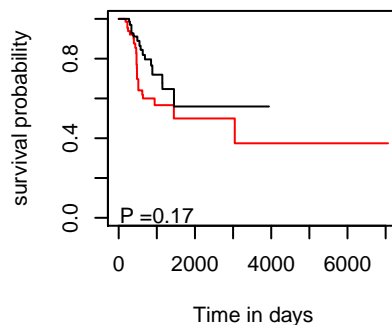

**DSS hsa-mir-4746**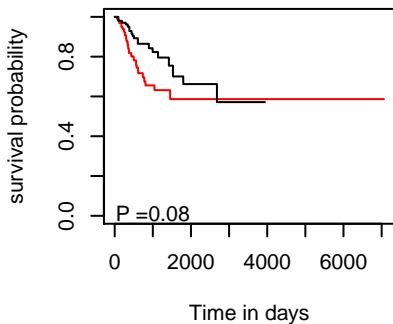**OS hsa-mir-6802**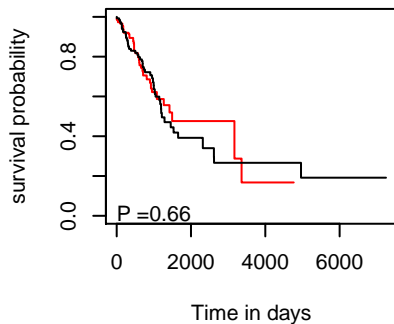**PFI hsa-mir-6802**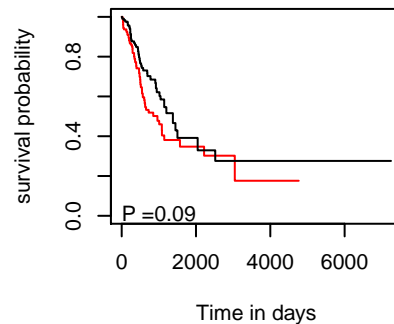**DFI hsa-mir-6802**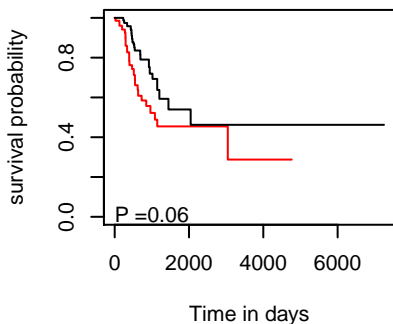**DSS hsa-mir-6802**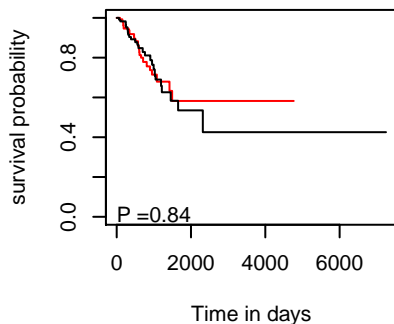**OS hsa-mir-6803**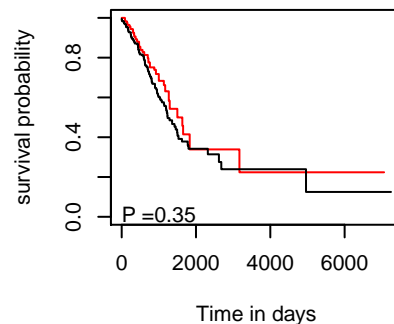**PFI hsa-mir-6803**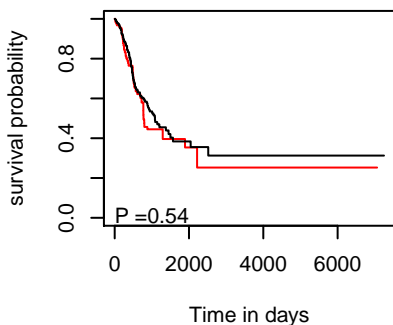**DFI hsa-mir-6803**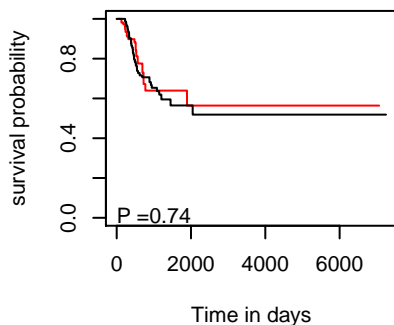**DSS hsa-mir-6803**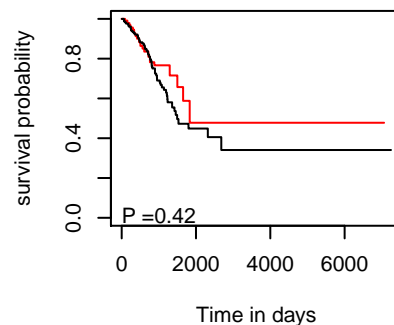

**OS hsa-mir-1292**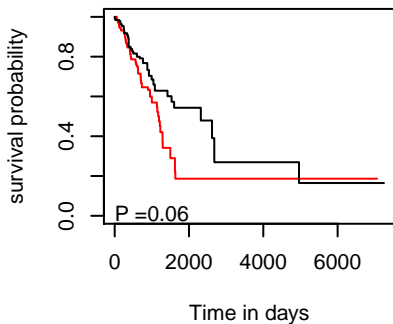**PFI hsa-mir-1292**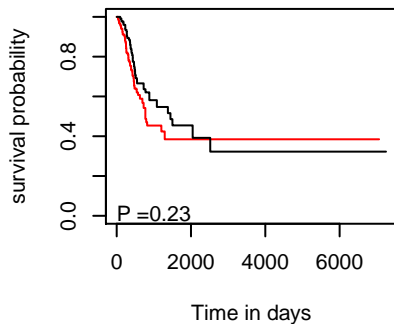**DFI hsa-mir-1292**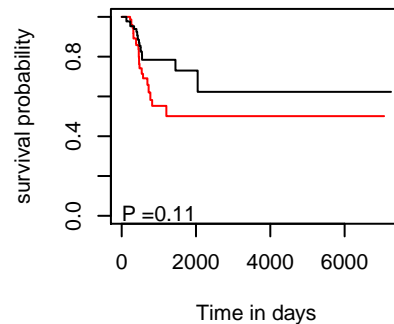**DSS hsa-mir-1292**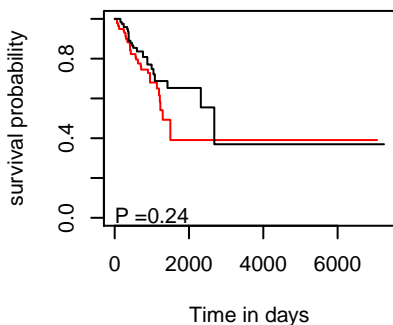**OS hsa-mir-3607**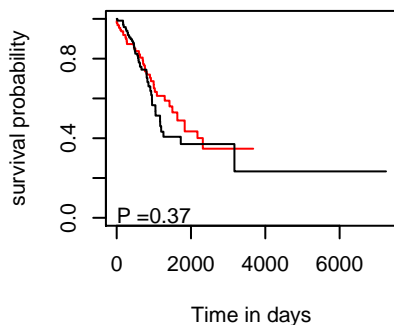**PFI hsa-mir-3607**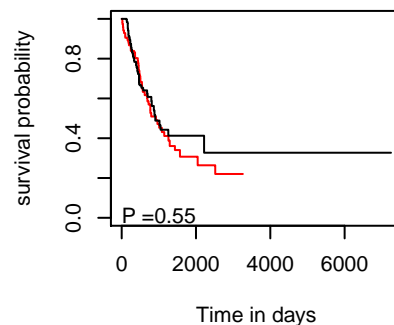**DFI hsa-mir-3607**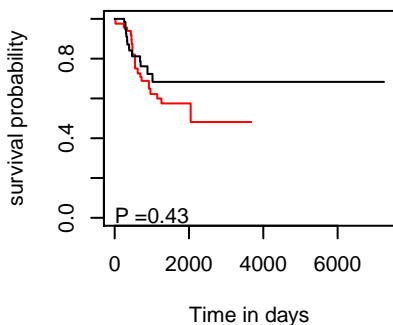**DSS hsa-mir-3607**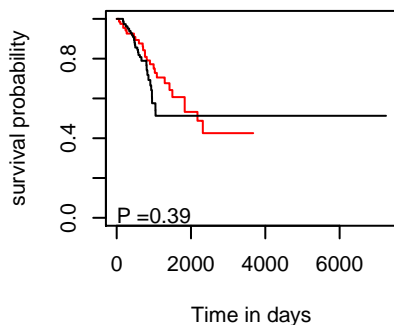**OS hsa-mir-520a**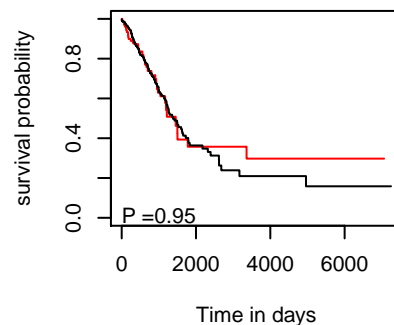

**PFI hsa-mir-520a**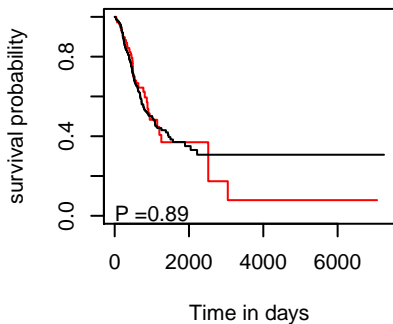**DFI hsa-mir-520a**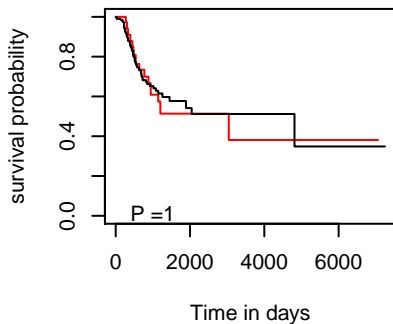**DSS hsa-mir-520a**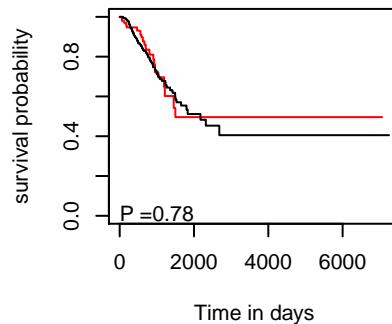**OS hsa-mir-675**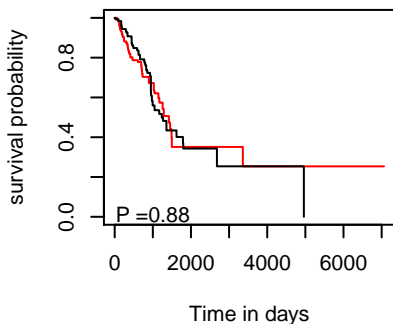**PFI hsa-mir-675**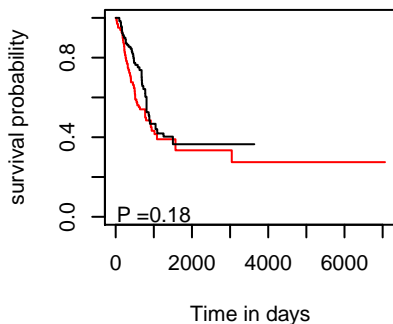**DFI hsa-mir-675**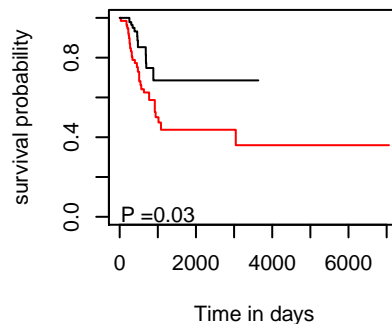**DSS hsa-mir-675**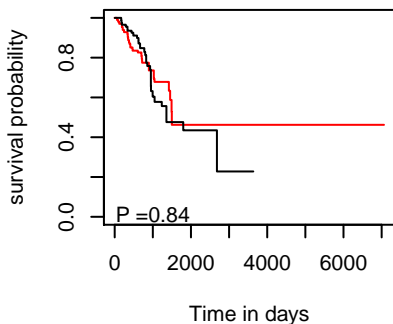**OS hsa-mir-5187**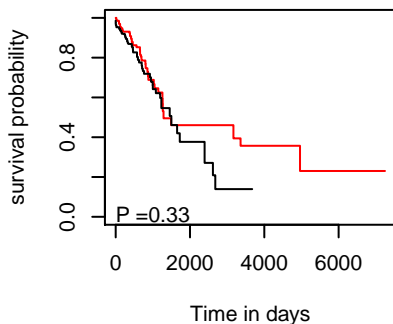**PFI hsa-mir-5187**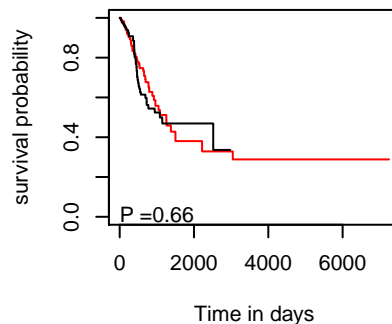

**DFI hsa-mir-5187**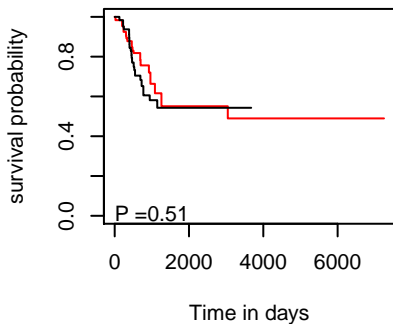**DSS hsa-mir-5187**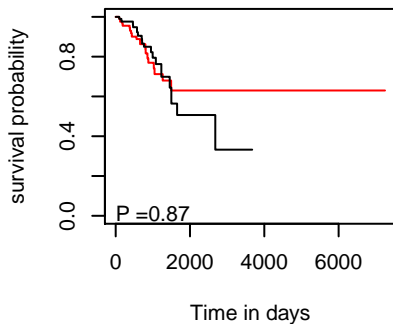**OS hsa-mir-944**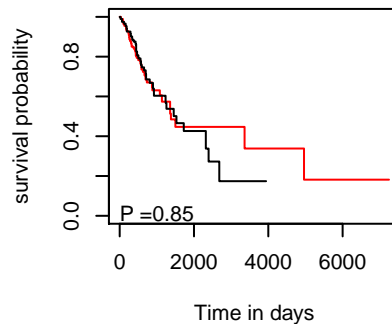**PFI hsa-mir-944**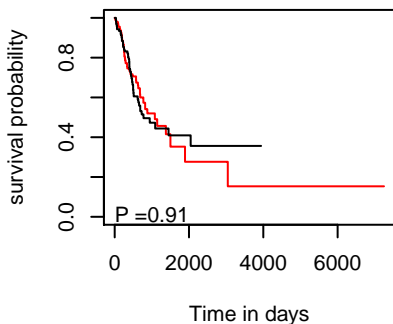**DFI hsa-mir-944**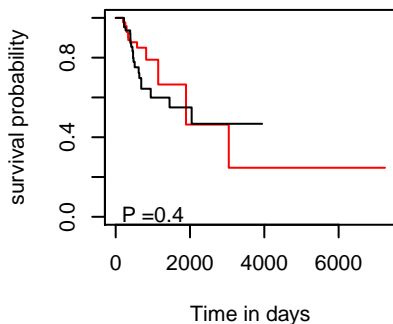**DSS hsa-mir-944**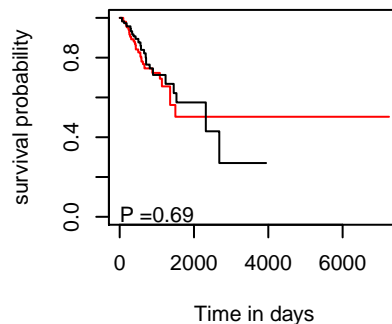**OS hsa-mir-1910**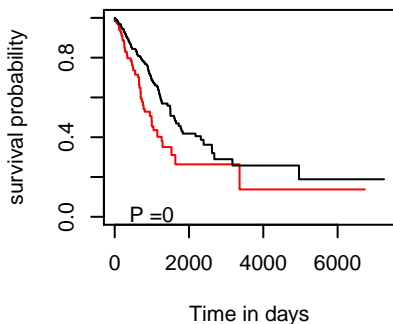**PFI hsa-mir-1910**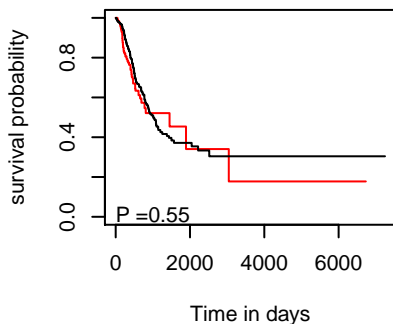**DFI hsa-mir-1910**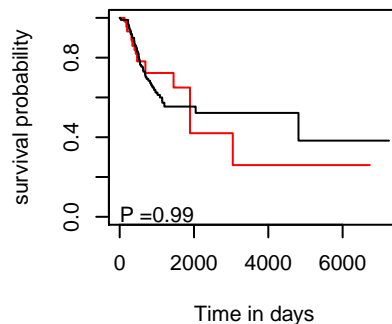

**DSS hsa-mir-1910**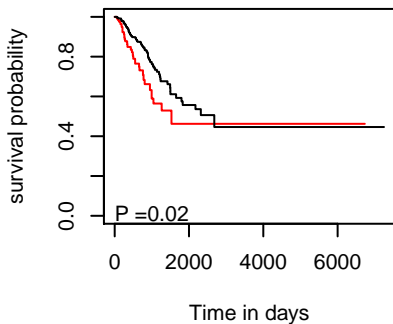**OS hsa-mir-581**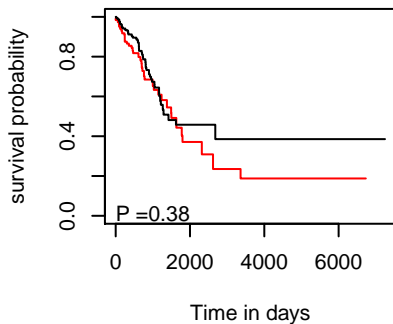**PFI hsa-mir-581**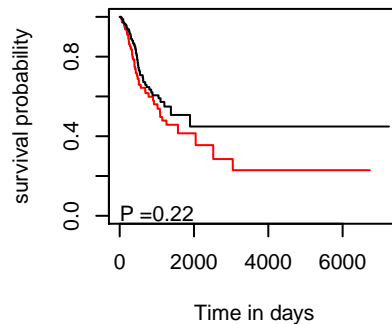**DFI hsa-mir-581**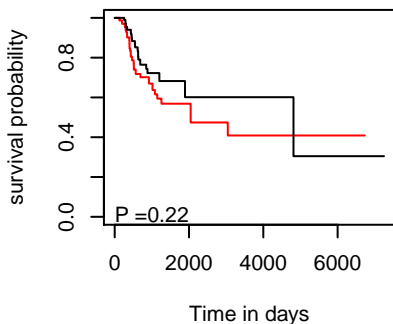**DSS hsa-mir-581**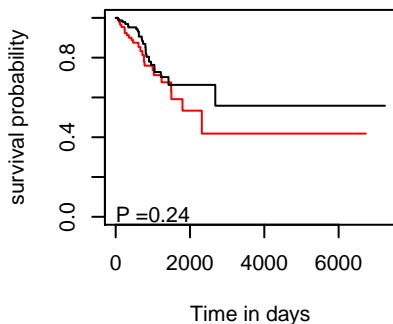**OS hsa-mir-942**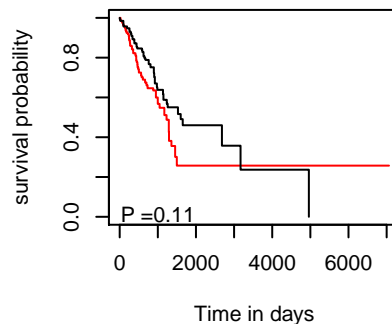**PFI hsa-mir-942**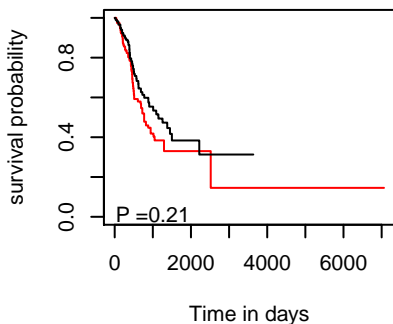**DFI hsa-mir-942**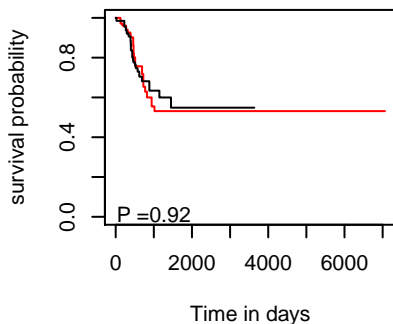**DSS hsa-mir-942**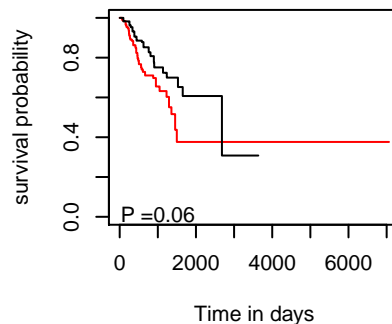

**OS hsa-mir-4777**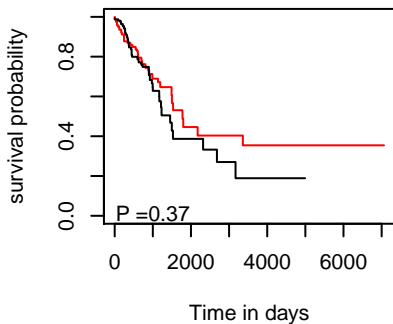**PFI hsa-mir-4777**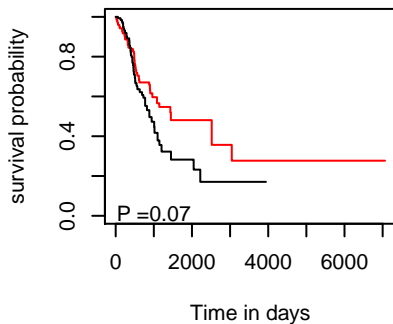**DFI hsa-mir-4777**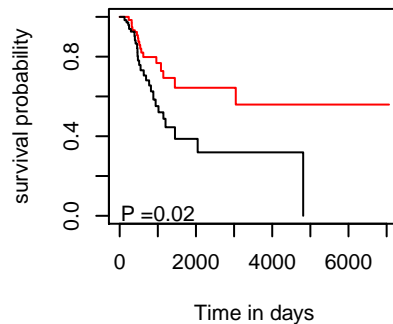**DSS hsa-mir-4777**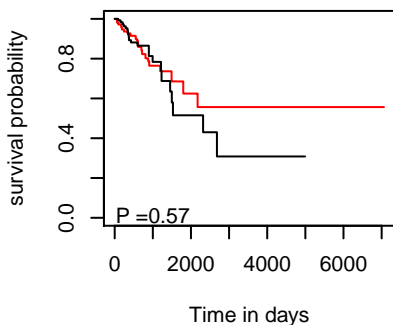**OS hsa-mir-31**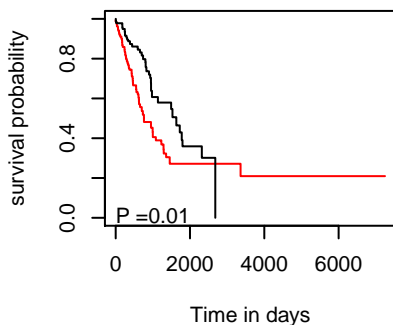**PFI hsa-mir-31**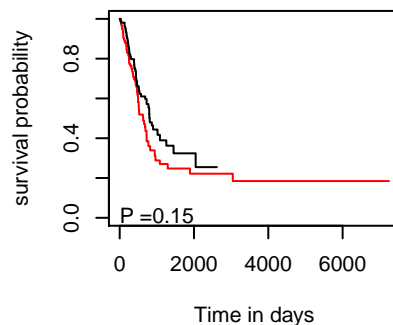**DFI hsa-mir-31**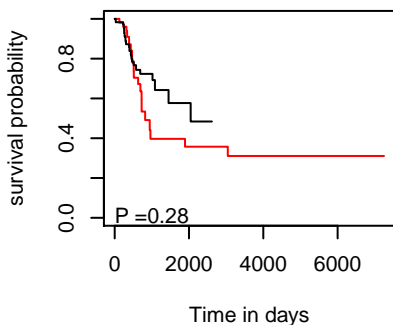**DSS hsa-mir-31**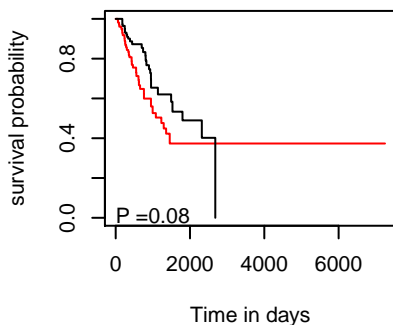**OS hsa-mir-5703**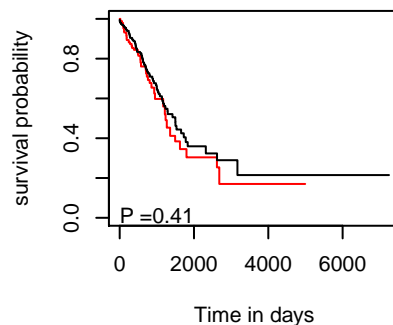

**PFI hsa-mir-5703**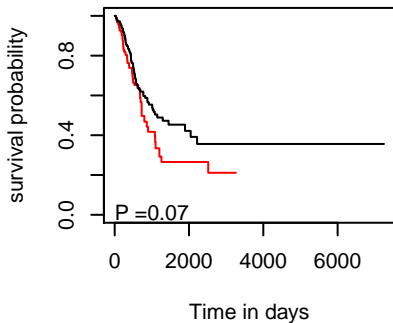**DFI hsa-mir-5703**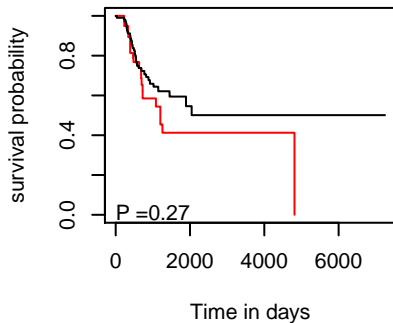**DSS hsa-mir-5703**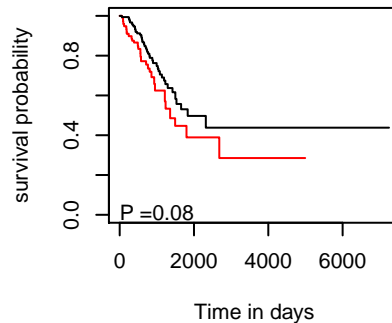**OS hsa-mir-3195**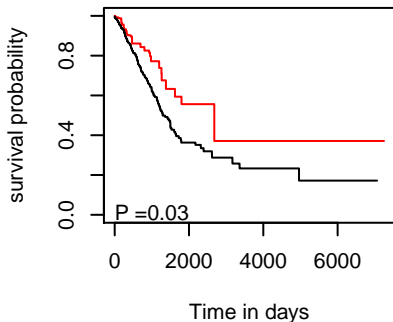**PFI hsa-mir-3195**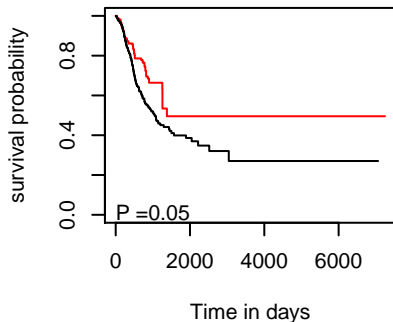**DFI hsa-mir-3195**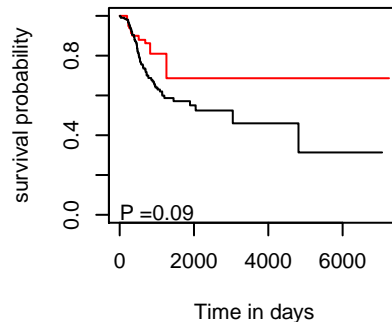**DSS hsa-mir-3195**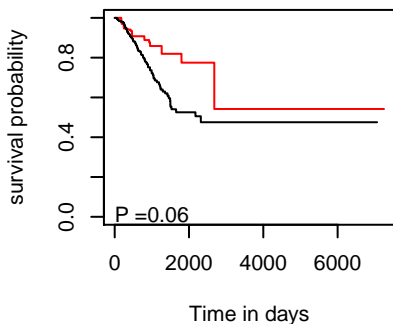**OS hsa-mir-4473**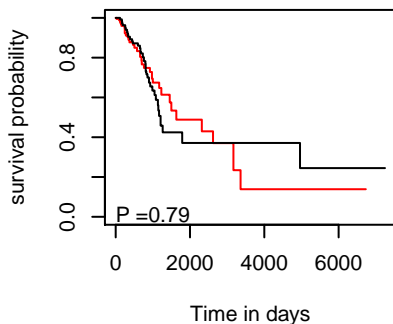**PFI hsa-mir-4473**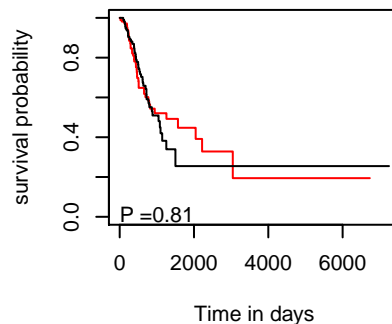

**DFI hsa-mir-4473**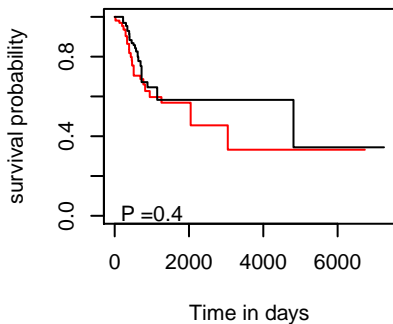**DSS hsa-mir-4473**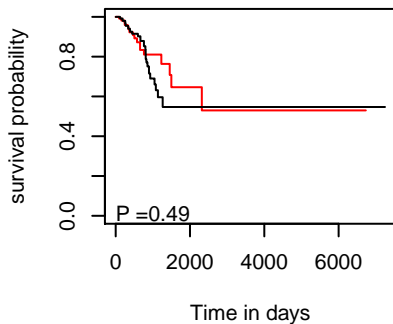**OS hsa-mir-4797**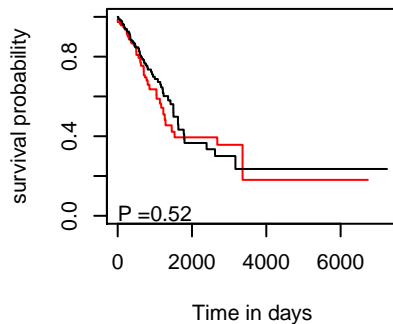**PFI hsa-mir-4797**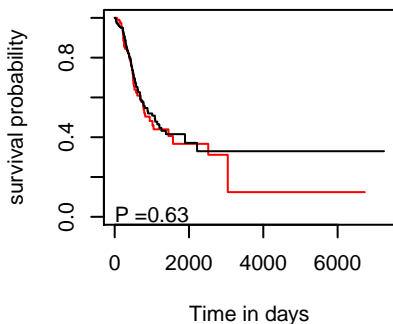**DFI hsa-mir-4797**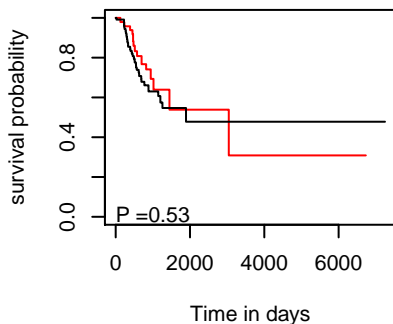**DSS hsa-mir-4797**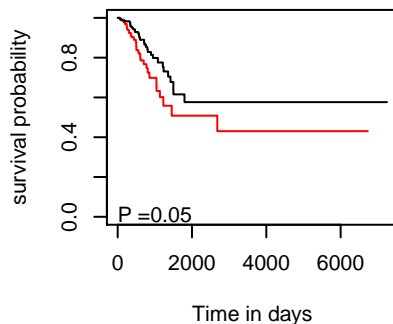**OS hsa-let-7b**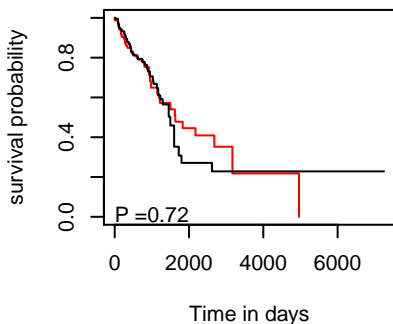**PFI hsa-let-7b**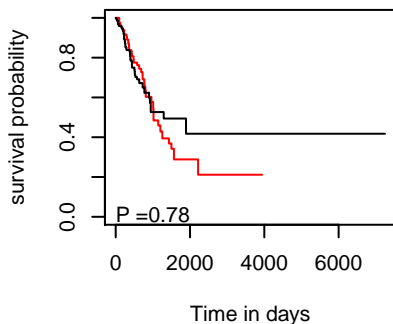**DFI hsa-let-7b**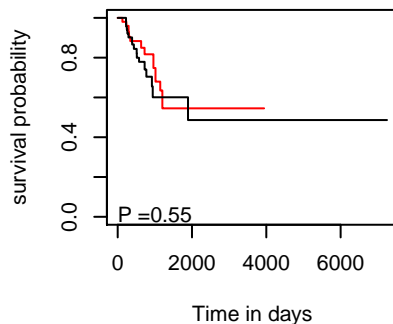

**DSS hsa-let-7b**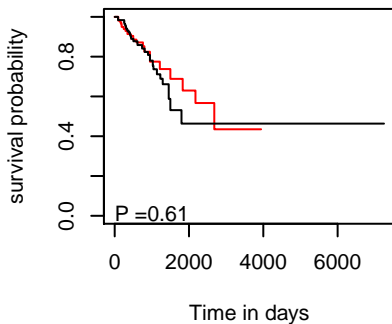**OS hsa-mir-212**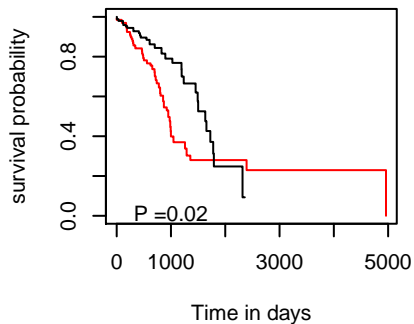**PFI hsa-mir-212**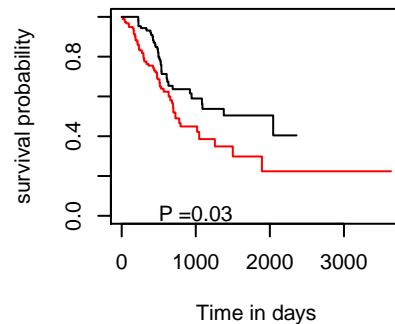**DFI hsa-mir-212**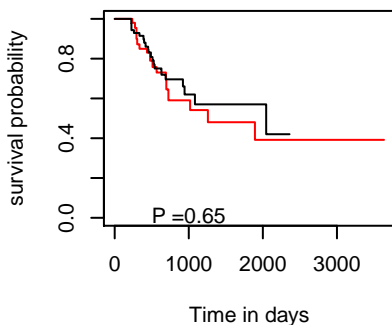**DSS hsa-mir-212**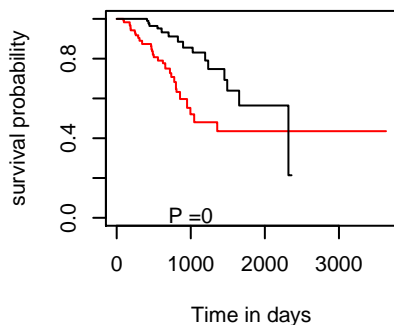**OS hsa-mir-212**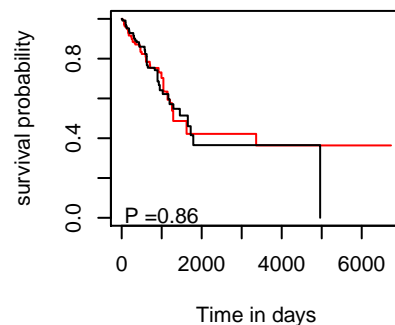**PFI hsa-mir-22**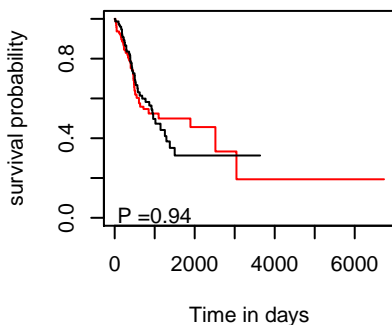**DFI hsa-mir-22**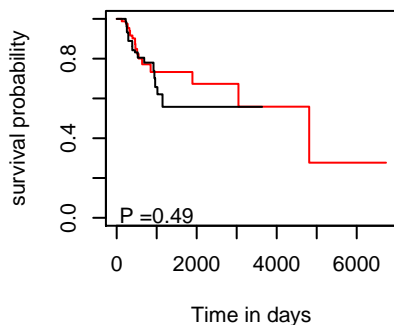**DSS hsa-mir-22**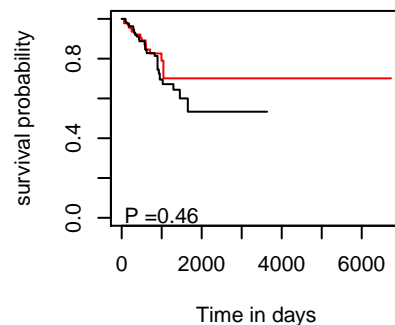

**OS hsa-mir-935**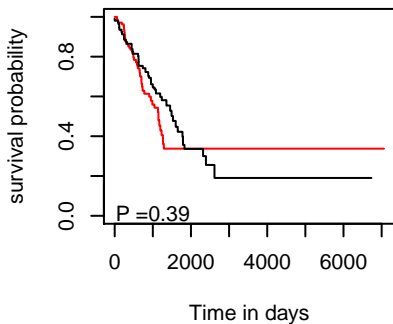**PFI hsa-mir-935**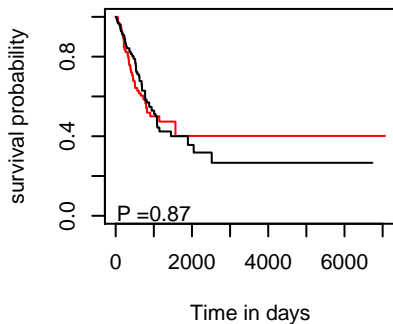**DFI hsa-mir-935**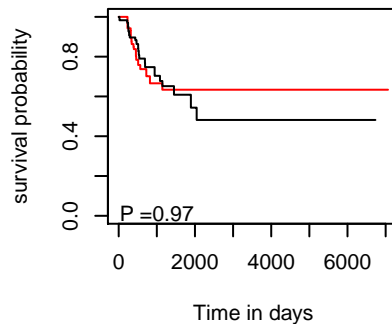**DSS hsa-mir-935**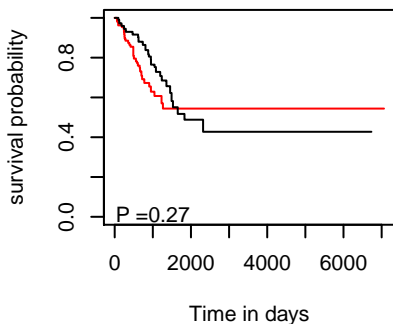**OS hsa-mir-4660**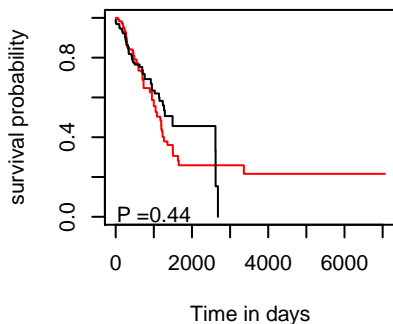**PFI hsa-mir-4660**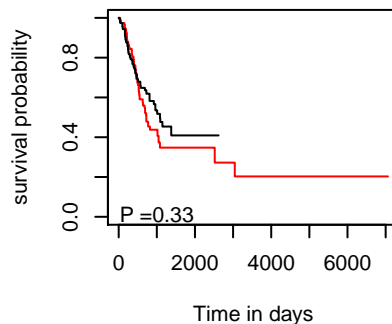**DFI hsa-mir-4660**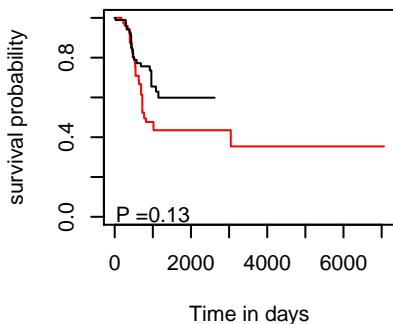**DSS hsa-mir-4660**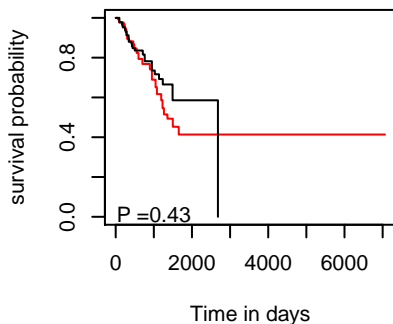**OS hsa-mir-125a**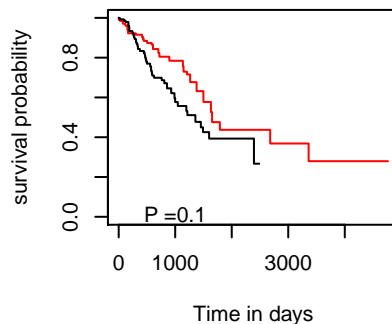

**PFI hsa-mir-125a**

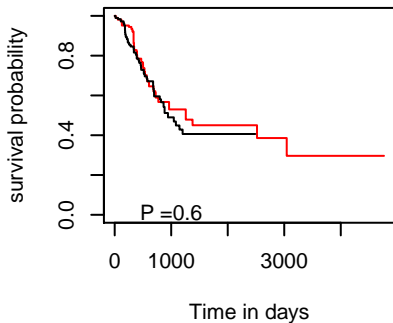

**DFI hsa-mir-125a**

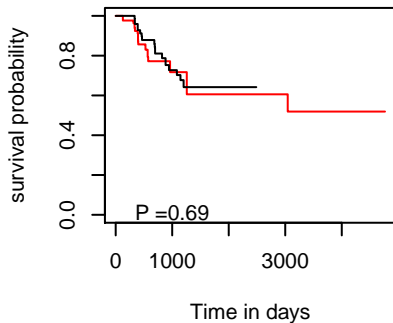

**DSS hsa-mir-125a**

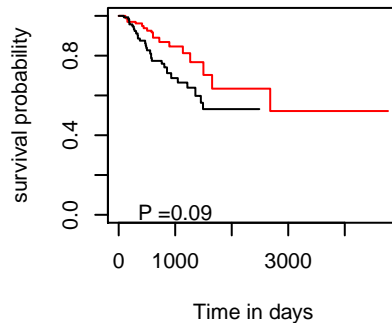

**OS hsa-mir-3613**

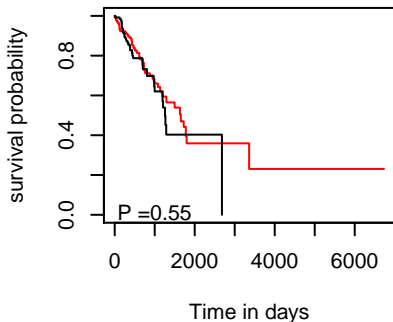

**PFI hsa-mir-3613**

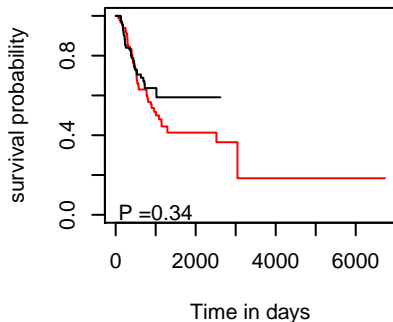

**DFI hsa-mir-3613**

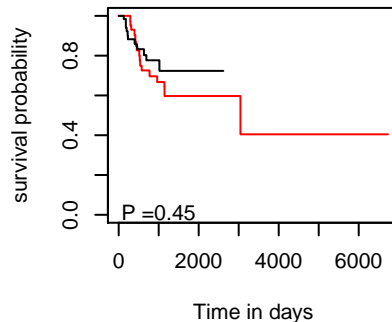

**DSS hsa-mir-3613**

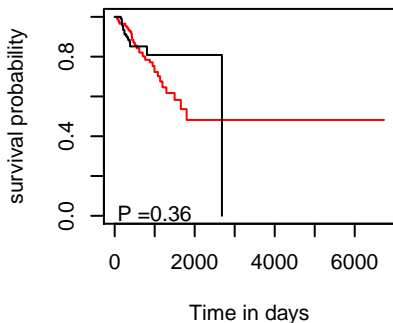

**OS hsa-mir-873**

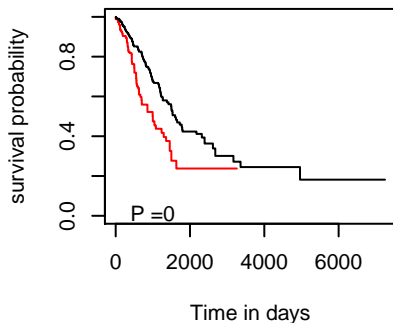

**PFI hsa-mir-873**

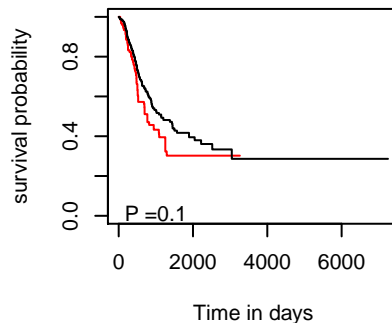

**DFI hsa-mir-873**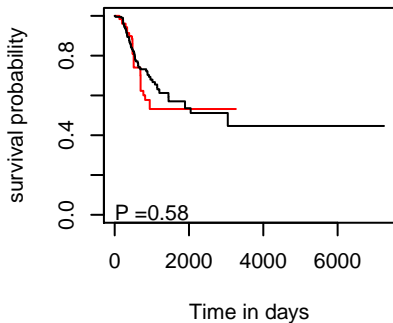**DSS hsa-mir-873**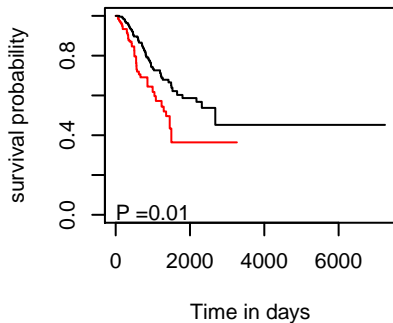**OS hsa-mir-873**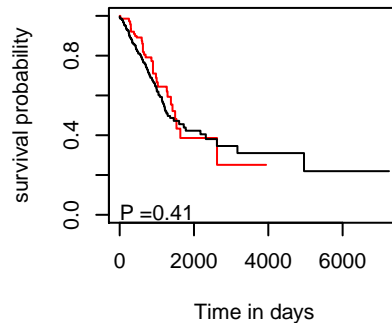**PFI hsa-mir-4800**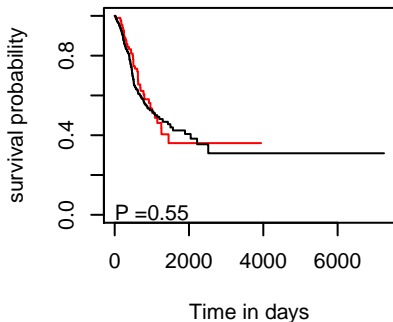**DFI hsa-mir-4800**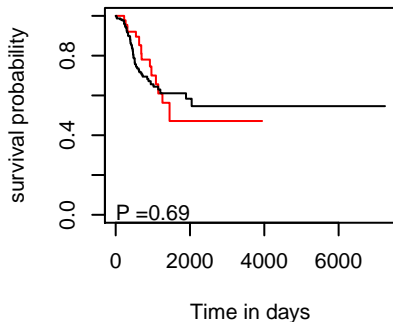**DSS hsa-mir-4800**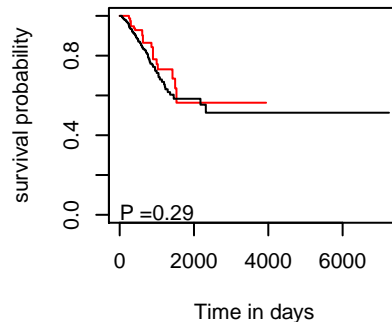**OS hsa-mir-5708**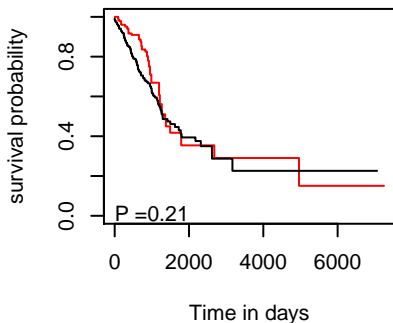**PFI hsa-mir-5708**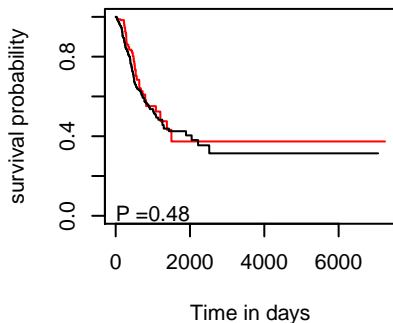**DFI hsa-mir-5708**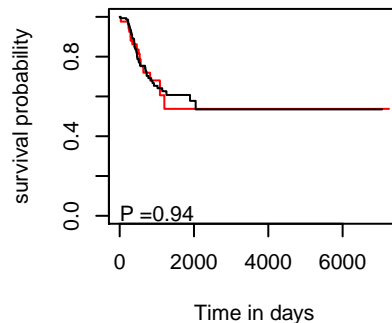

**DSS hsa-mir-5708**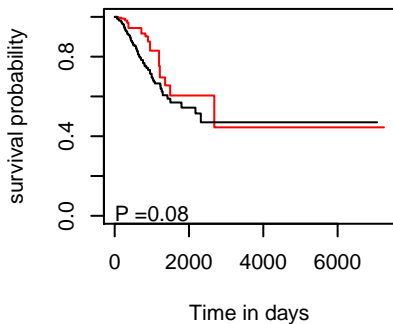**OS hsa-mir-4687**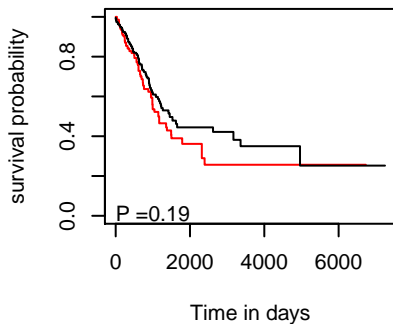**PFI hsa-mir-4687**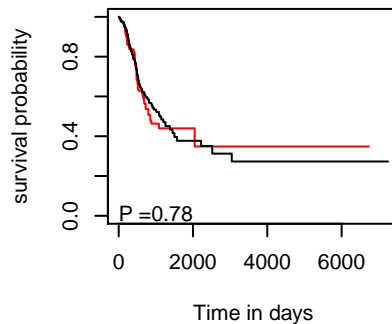**DFI hsa-mir-4687**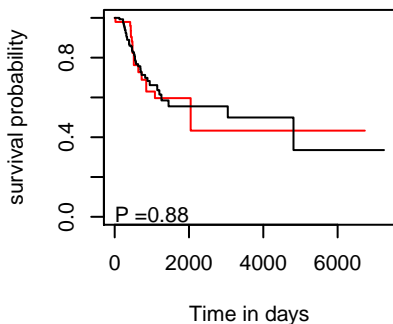**DSS hsa-mir-4687**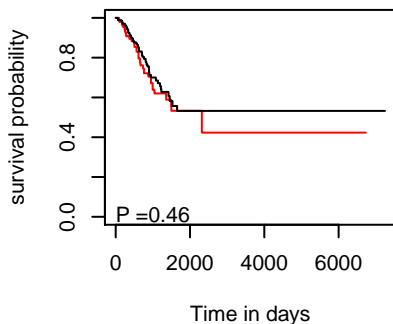**OS hsa-mir-4461**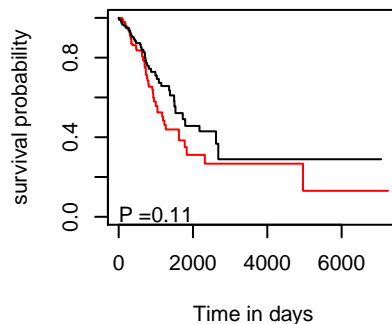**PFI hsa-mir-4461**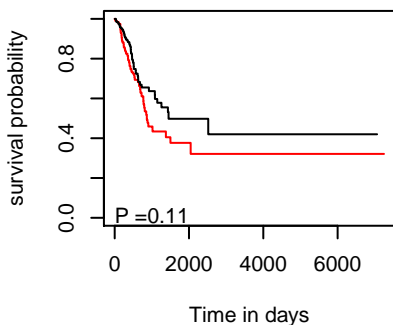**DFI hsa-mir-4461**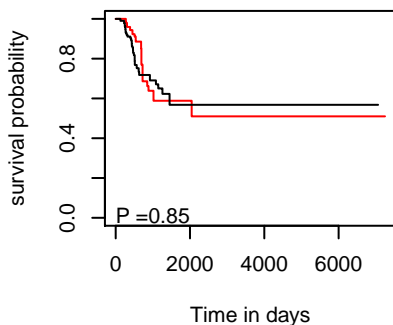**DSS hsa-mir-4461**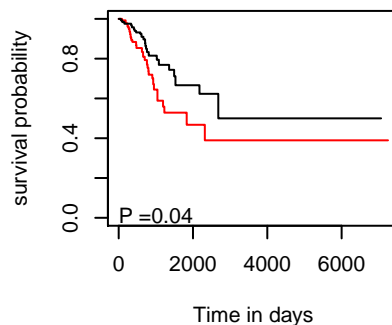

**OS hsa-mir-6813**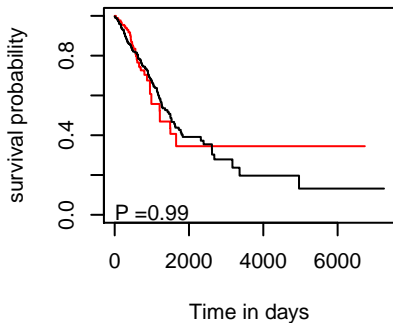**PFI hsa-mir-6813**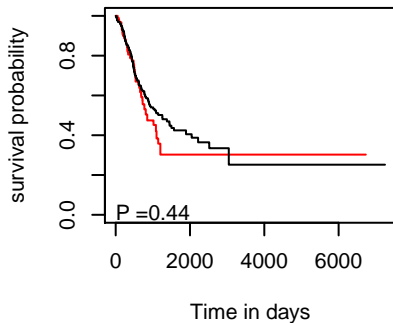**DFI hsa-mir-6813**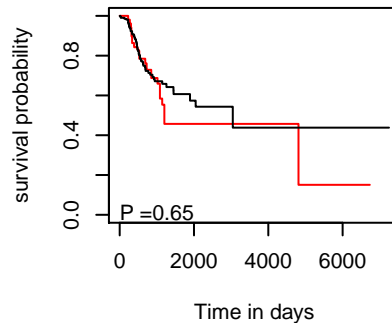**DSS hsa-mir-6813**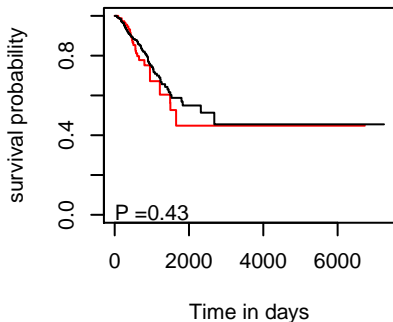**OS hsa-mir-150**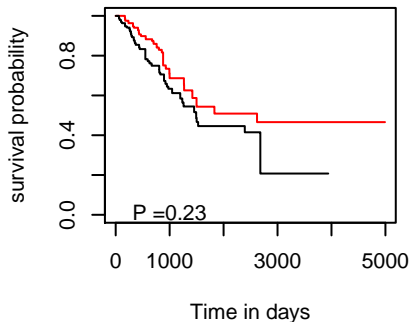**PFI hsa-mir-150**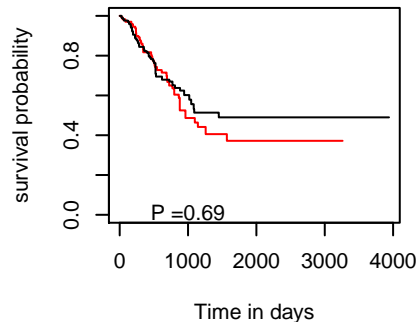**DFI hsa-mir-150**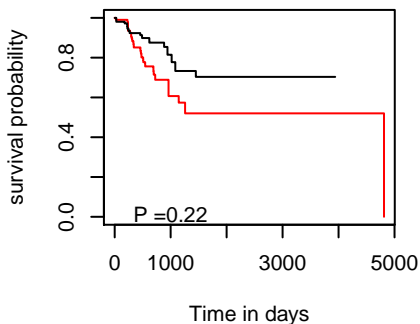**DSS hsa-mir-150**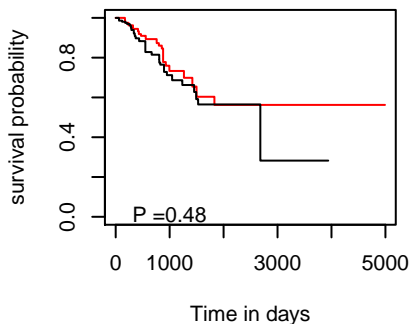**OS hsa-mir-320e**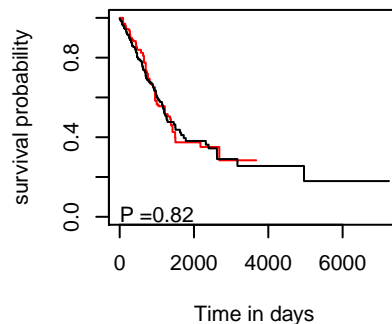

**PFI hsa-mir-320e**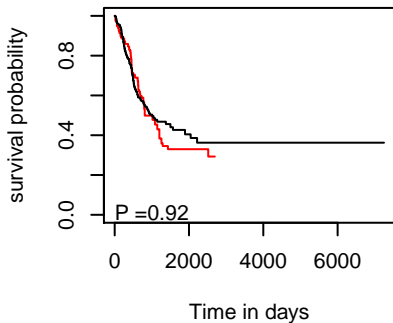**DFI hsa-mir-320e**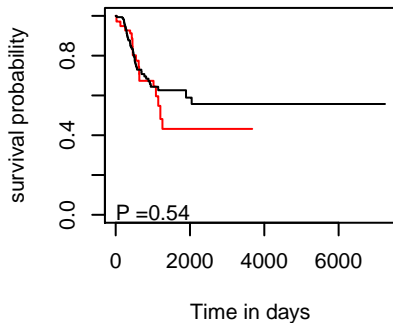**DSS hsa-mir-320e**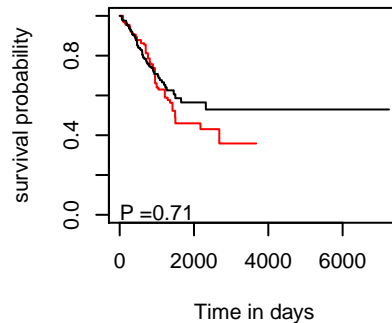**OS hsa-mir-4519**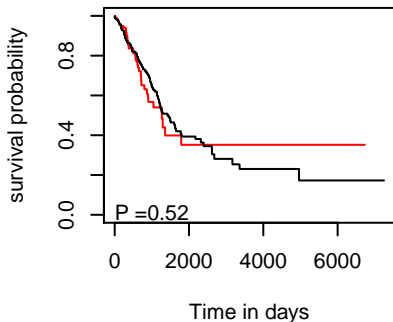**PFI hsa-mir-4519**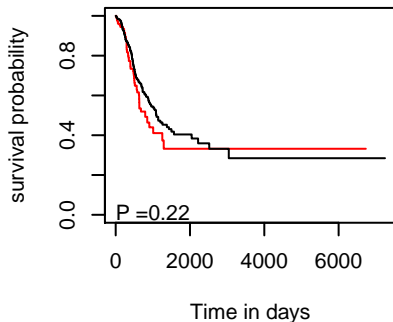**DFI hsa-mir-4519**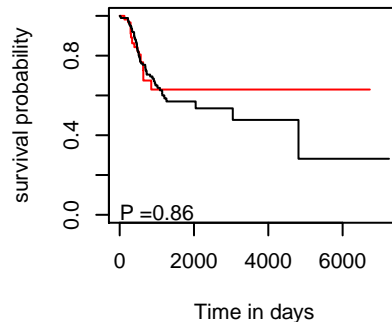**DSS hsa-mir-4519**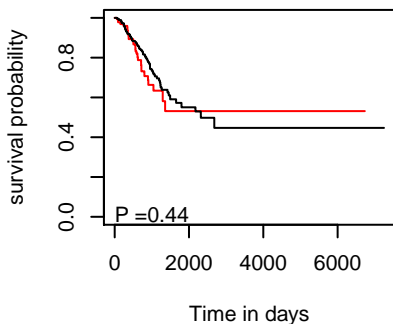**OS hsa-mir-769**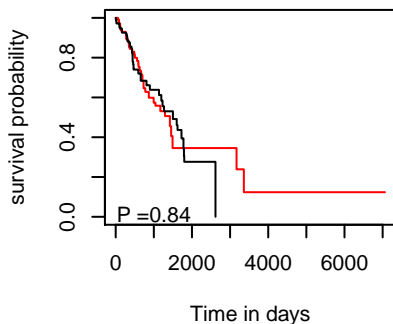**PFI hsa-mir-769**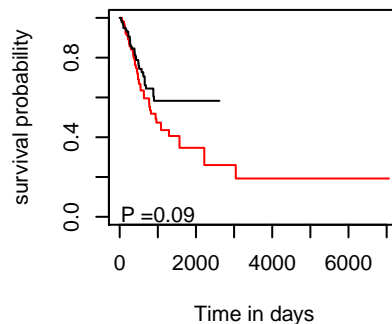

**DFI hsa-mir-769**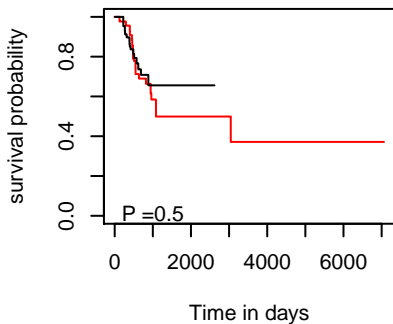**DSS hsa-mir-769**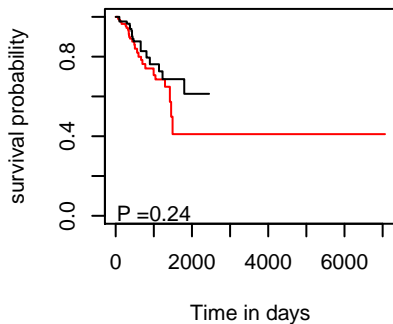**OS hsa-mir-5579**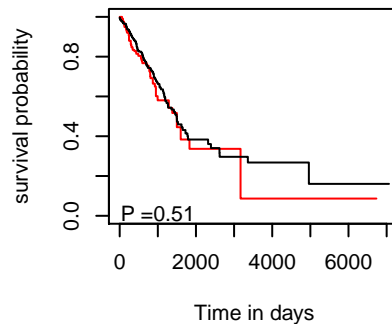**PFI hsa-mir-5579**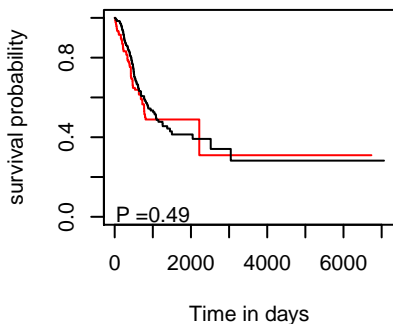**DFI hsa-mir-5579**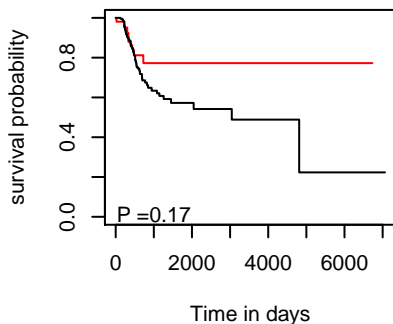**DSS hsa-mir-5579**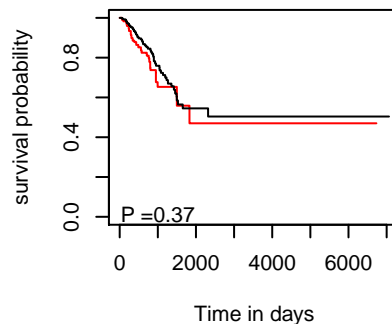**OS hsa-mir-185**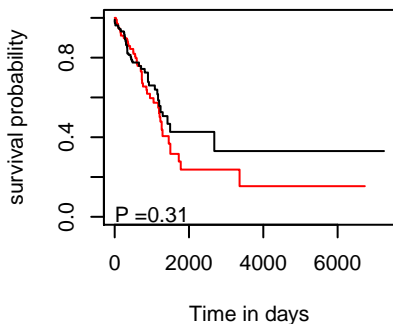**PFI hsa-mir-185**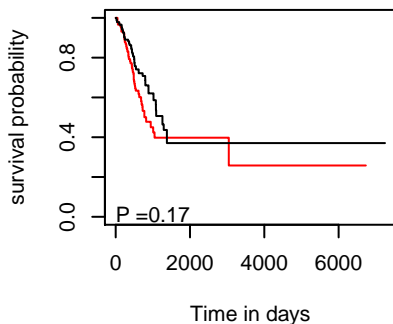**DFI hsa-mir-185**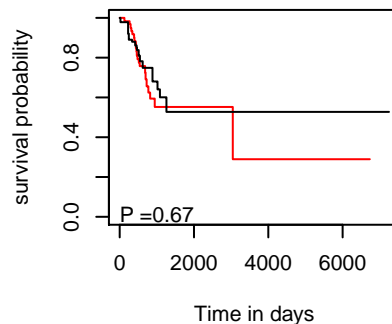

**DSS hsa-mir-185**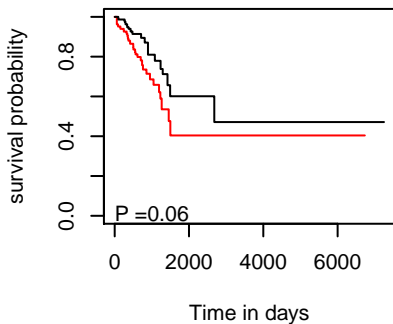**OS hsa-mir-210**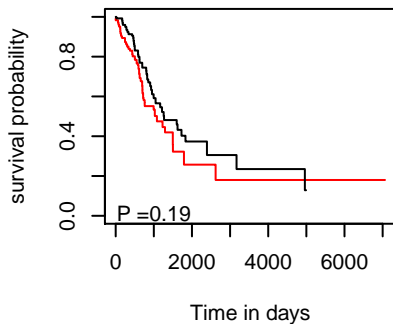**PFI hsa-mir-210**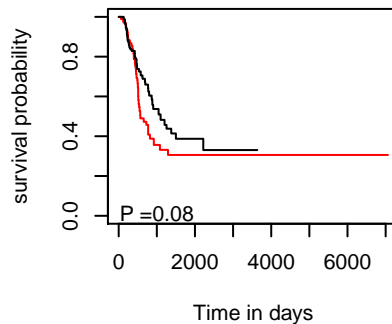**DFI hsa-mir-210**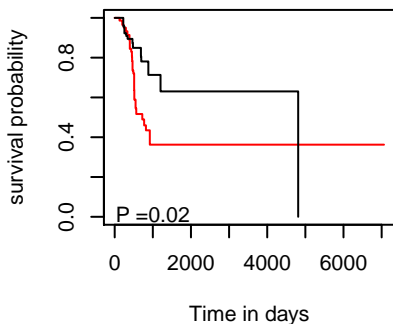**DSS hsa-mir-210**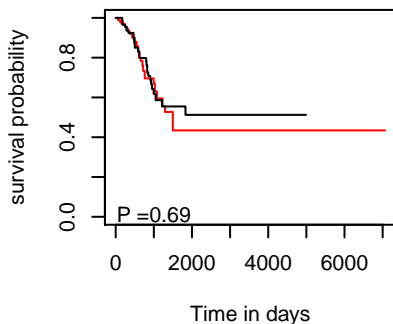**OS hsa-mir-6744**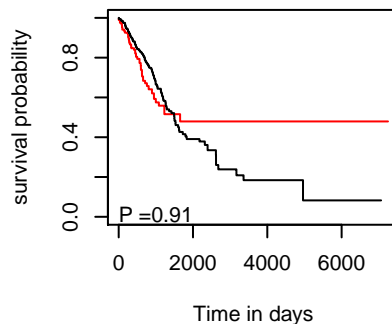**PFI hsa-mir-6744**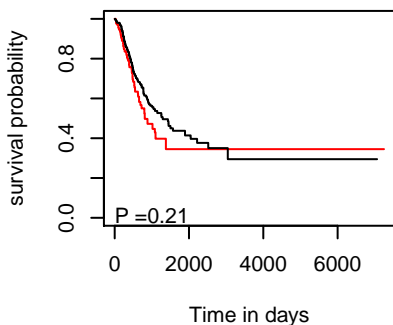**DFI hsa-mir-6744**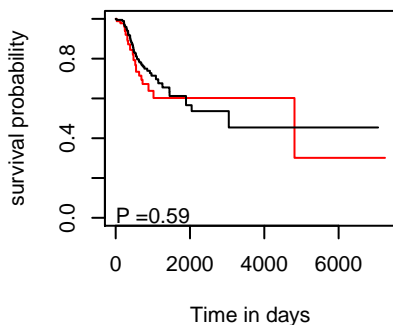**DSS hsa-mir-6744**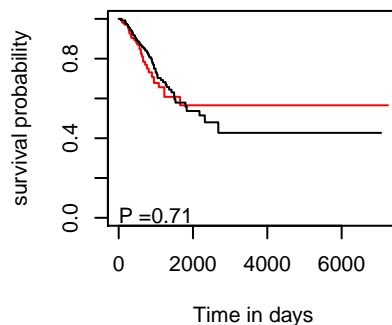

**OS hsa-mir-3667**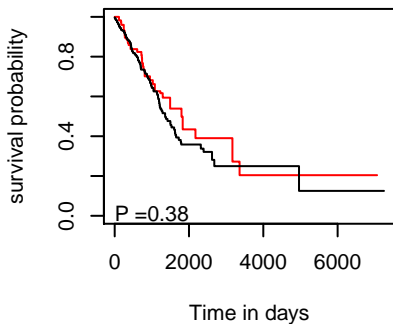**PFI hsa-mir-3667**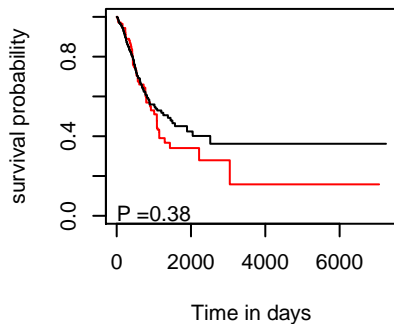**DFI hsa-mir-3667**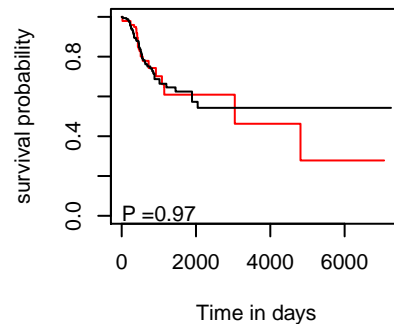**DSS hsa-mir-3667**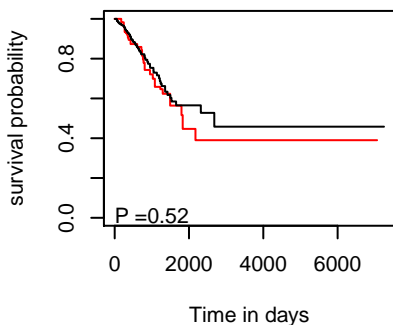**OS hsa-mir-4762**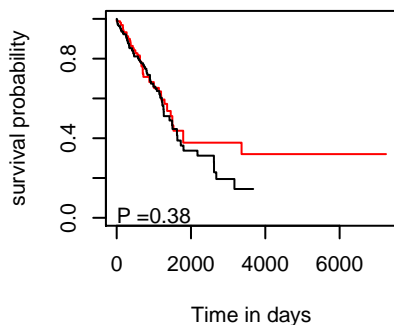**PFI hsa-mir-4762**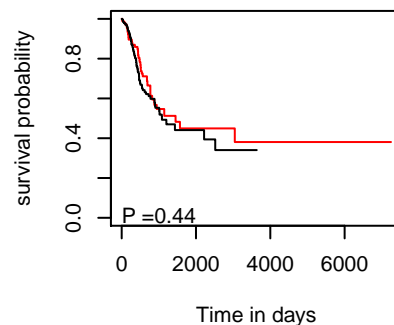**DFI hsa-mir-4762**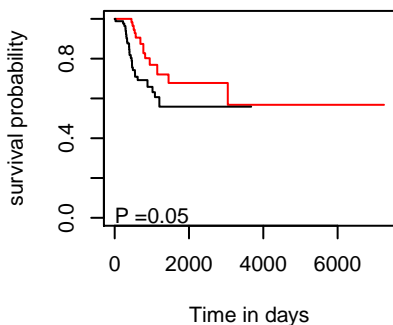**DSS hsa-mir-4762**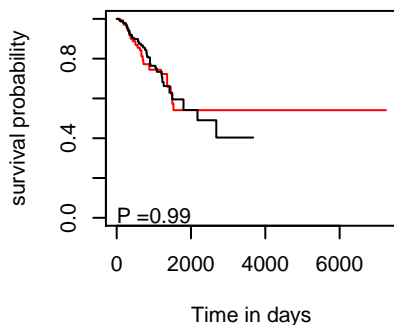**OS hsa-mir-3687**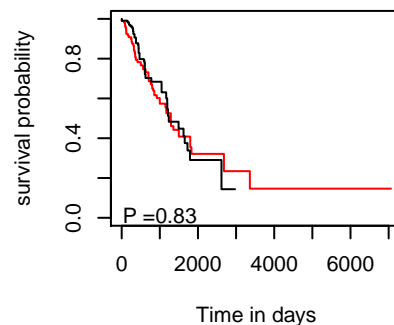



**DFI hsa-mir-7705**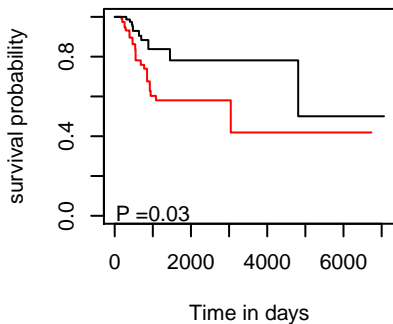**DSS hsa-mir-7705**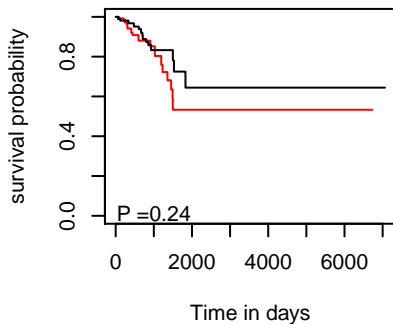**OS hsa-mir-30c-1**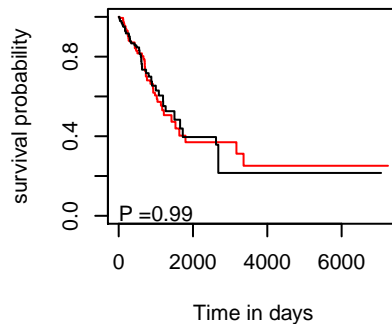**PFI hsa-mir-30c-1**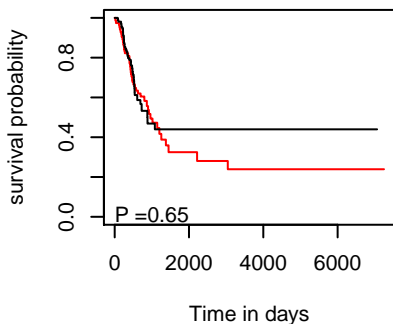**DFI hsa-mir-30c-1**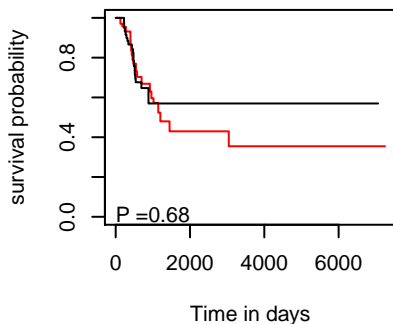**DSS hsa-mir-30c-1**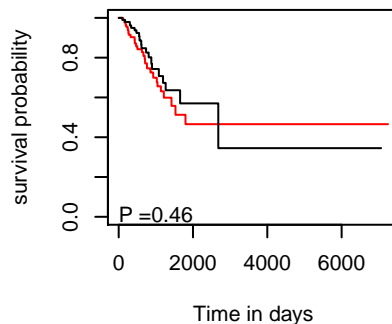**OS hsa-mir-3651**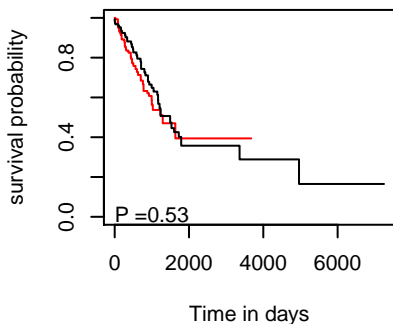**PFI hsa-mir-3651**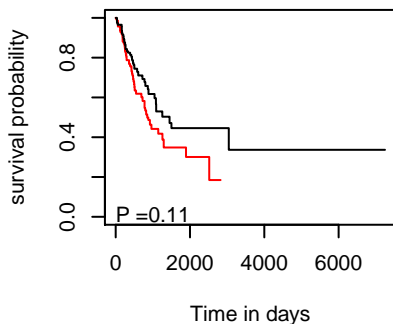**DFI hsa-mir-3651**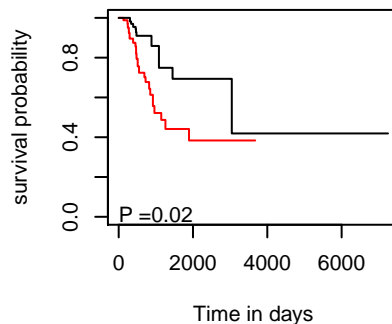

**DSS hsa-mir-3651**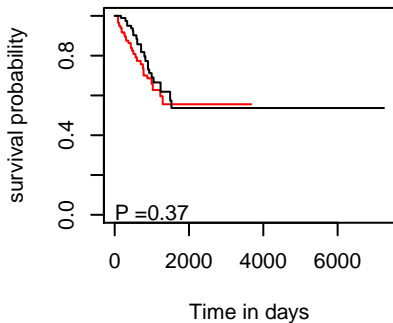**OS hsa-mir-708**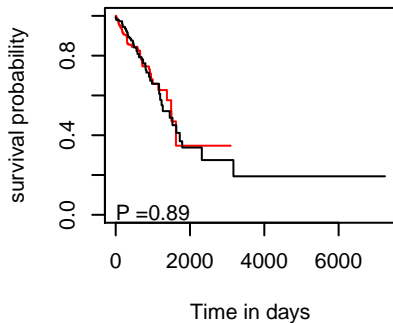**PFI hsa-mir-708**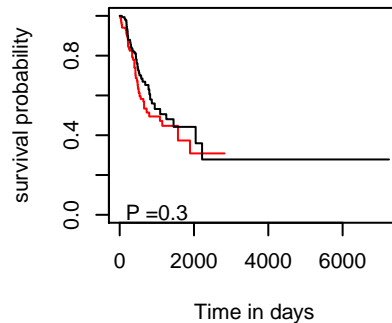**DFI hsa-mir-708**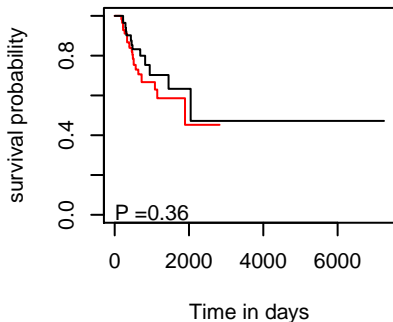**DSS hsa-mir-708**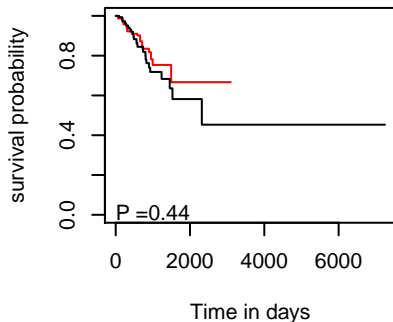**OS hsa-mir-491**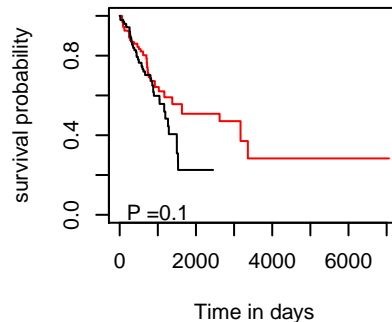**PFI hsa-mir-491**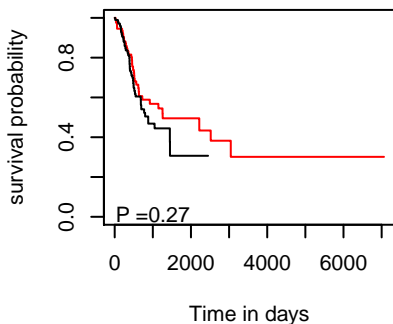**DFI hsa-mir-491**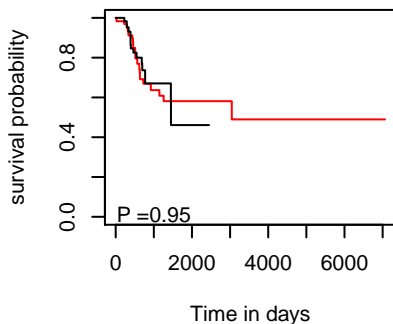**DSS hsa-mir-491**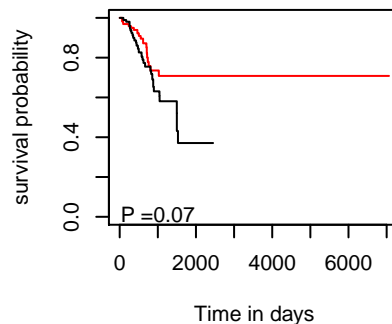

**OS hsa-mir-578**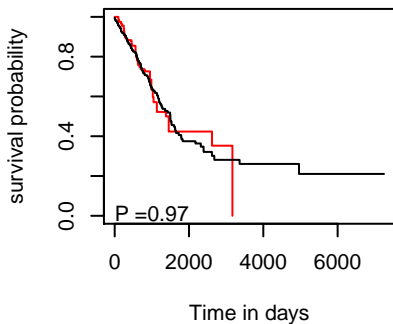**PFI hsa-mir-578**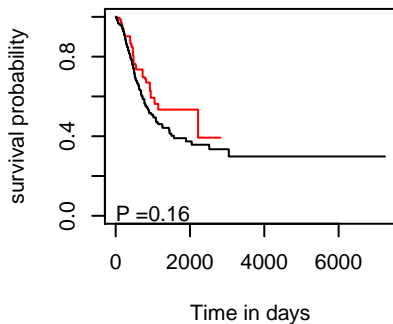**DFI hsa-mir-578**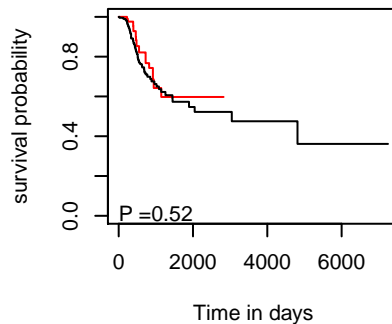**DSS hsa-mir-578**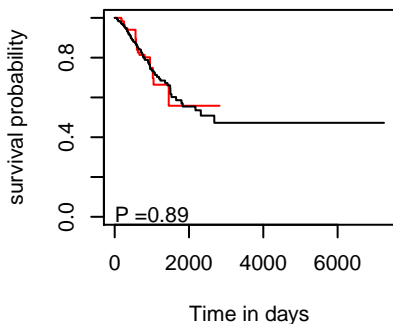**OS hsa-mir-4484**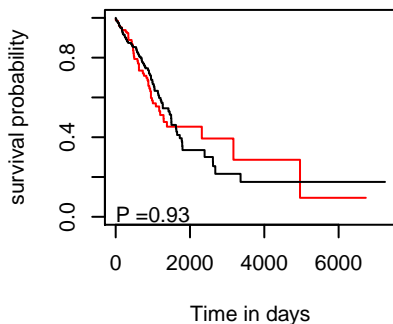**PFI hsa-mir-4484**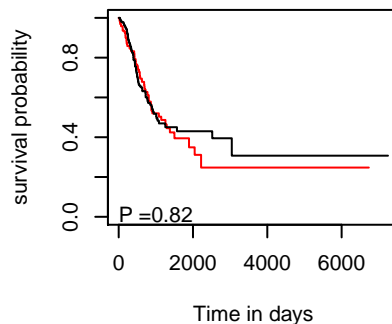**DFI hsa-mir-4484**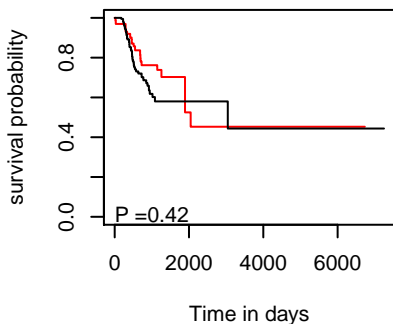**DSS hsa-mir-4484**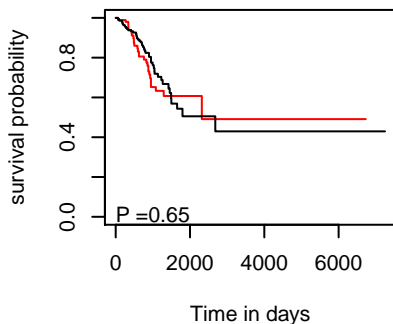**OS hsa-mir-4423**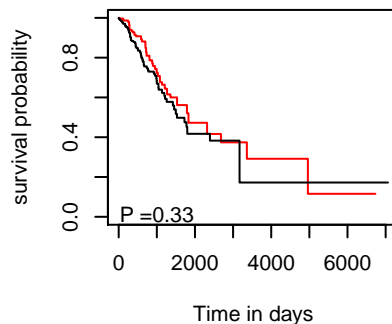

**PFI hsa-mir-4423**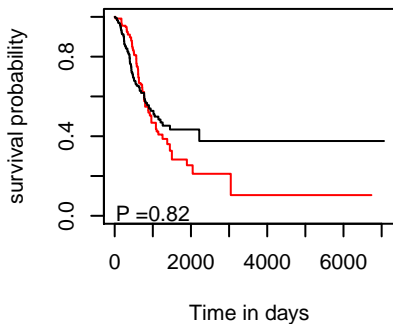**DFI hsa-mir-4423**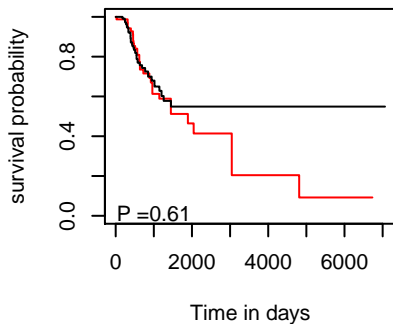**DSS hsa-mir-4423**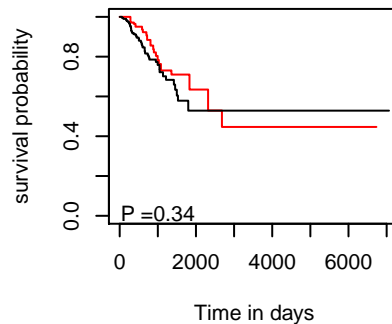**OS hsa-mir-28**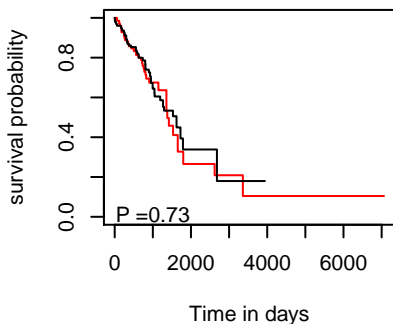**PFI hsa-mir-28**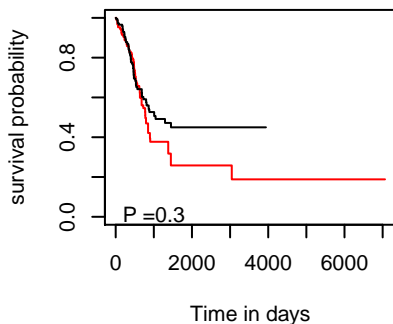**DFI hsa-mir-28**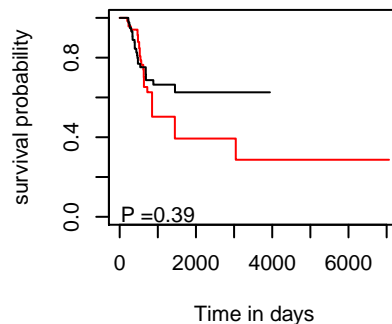**DSS hsa-mir-28**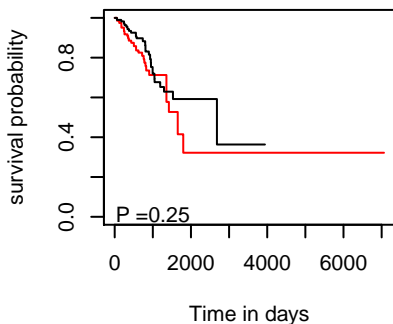**OS hsa-let-7a-3**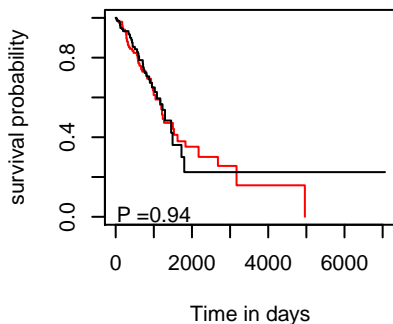**PFI hsa-let-7a-3**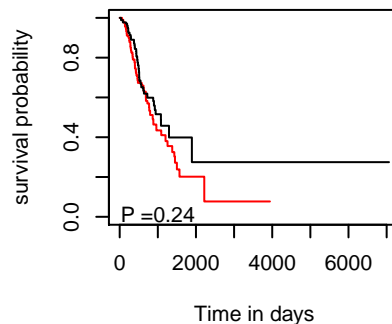

**DFI hsa-let-7a-3**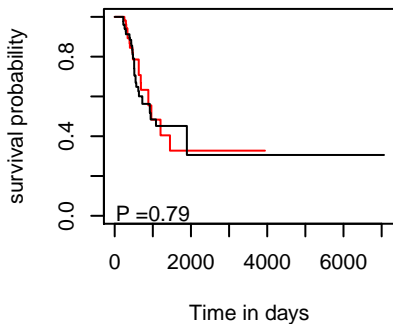**DSS hsa-let-7a-3**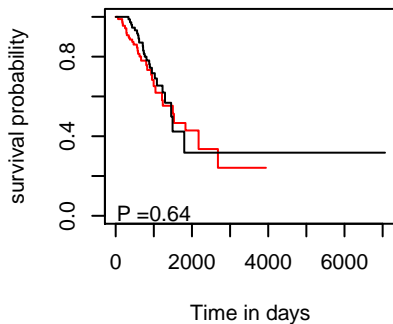**OS hsa-mir-132**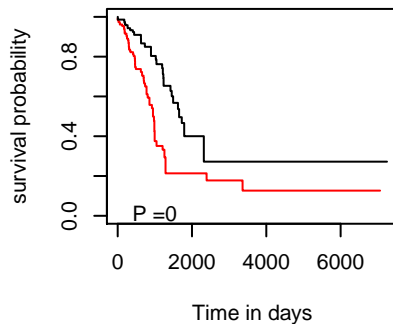**PFI hsa-mir-132**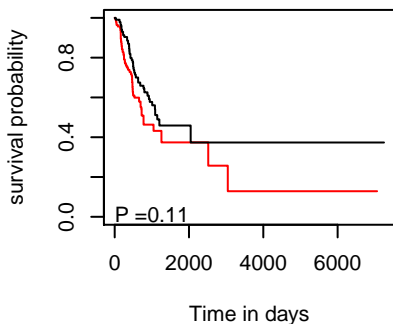**DFI hsa-mir-132**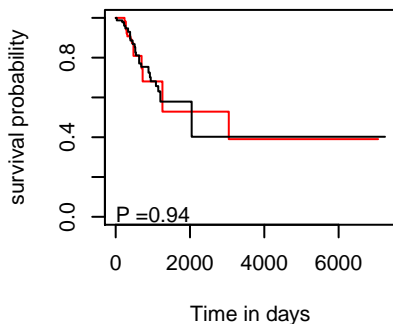**DSS hsa-mir-132**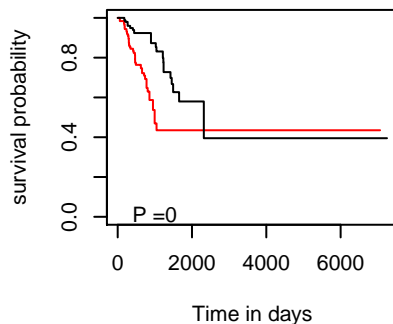**OS hsa-mir-4758**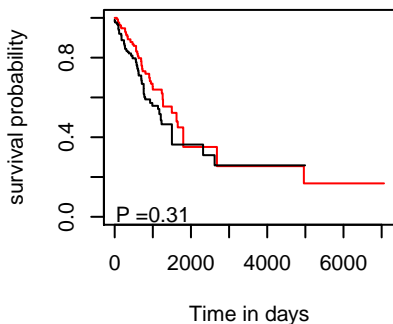**PFI hsa-mir-4758**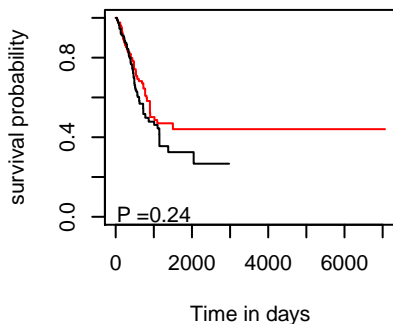**DFI hsa-mir-4758**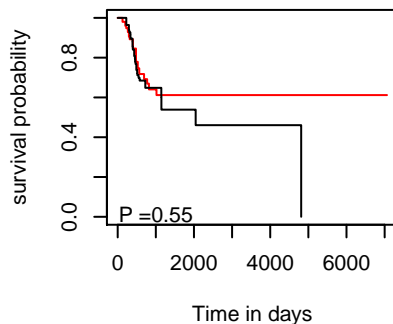

**DSS hsa-mir-4758**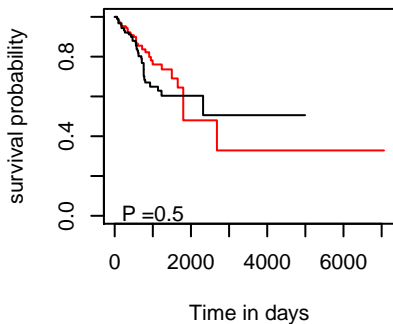**OS hsa-mir-320c-2**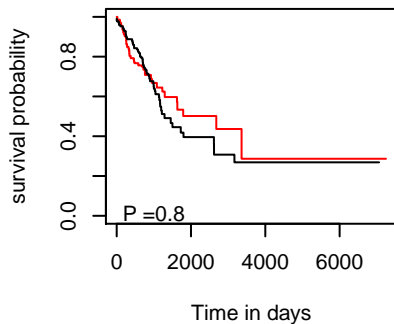**PFI hsa-mir-320c-2**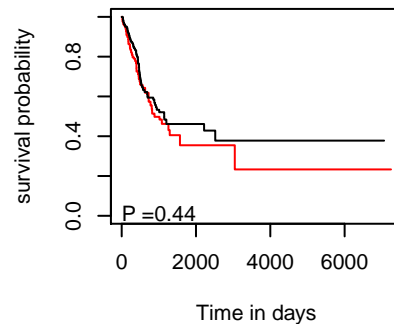**DFI hsa-mir-320c-2**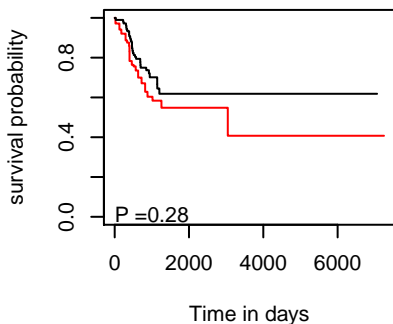**DSS hsa-mir-320c-2**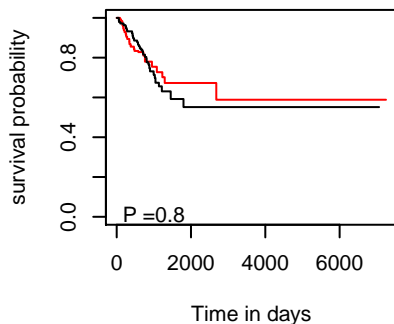**OS hsa-mir-6737**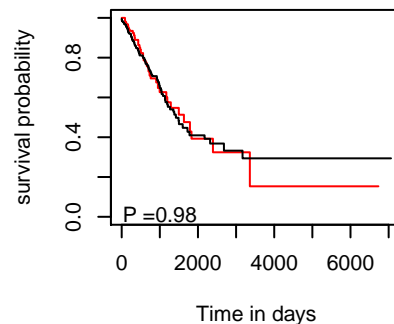**PFI hsa-mir-6737**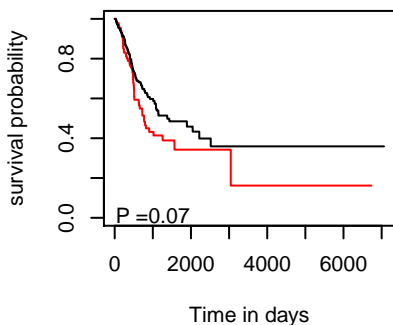**DFI hsa-mir-6737**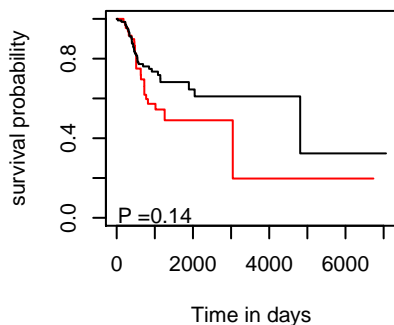**DSS hsa-mir-6737**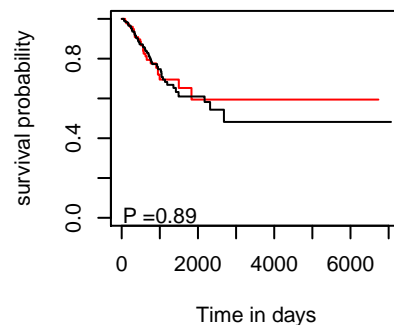

**OS hsa-mir-6843**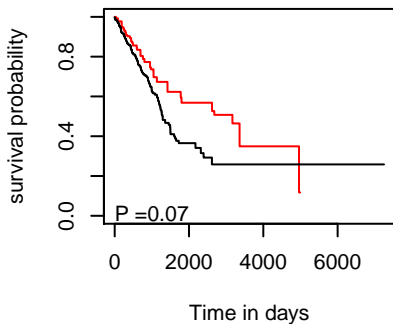**PFI hsa-mir-6843**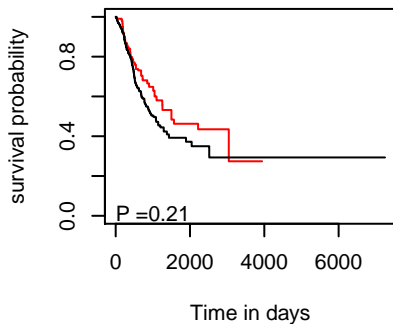**DFI hsa-mir-6843**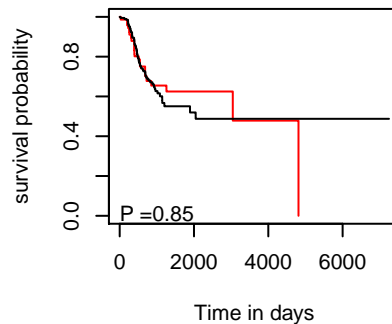**DSS hsa-mir-6843**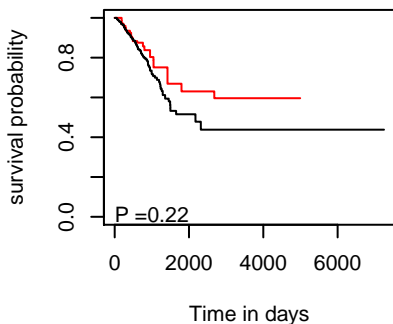**OS hsa-mir-3648**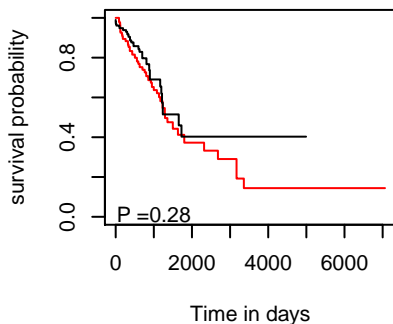**PFI hsa-mir-3648**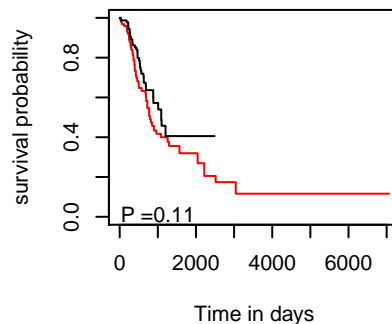**DFI hsa-mir-3648**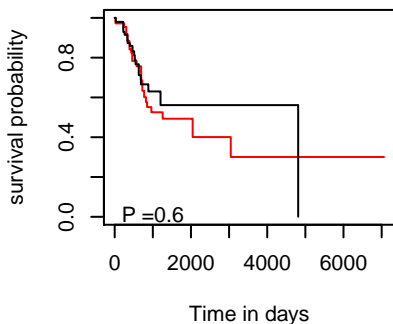**DSS hsa-mir-3648**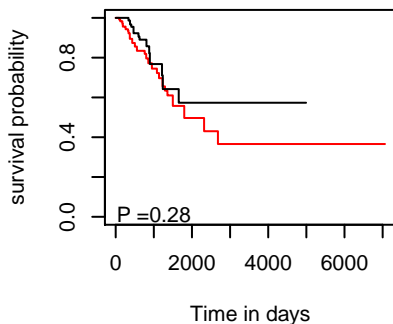**OS hsa-mir-3912**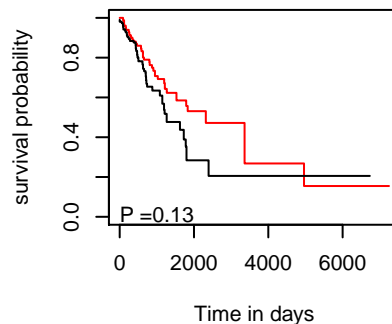

**PFI hsa-mir-3912**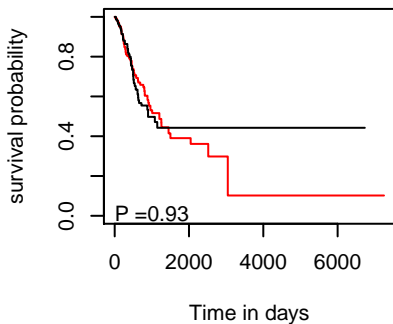**DFI hsa-mir-3912**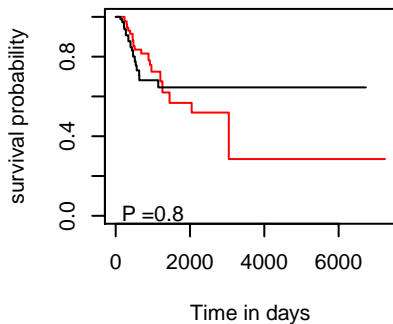**DSS hsa-mir-3912**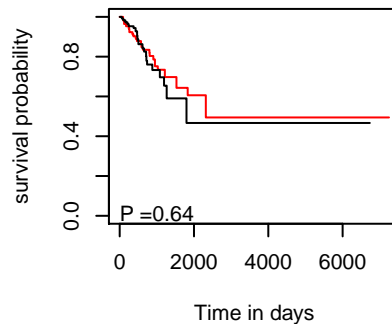**OS hsa-mir-330**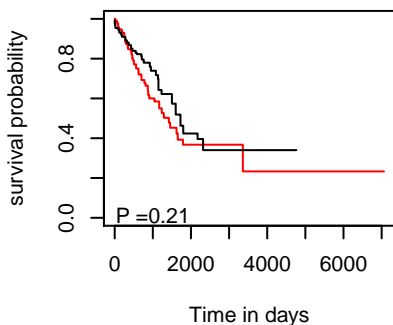**PFI hsa-mir-330**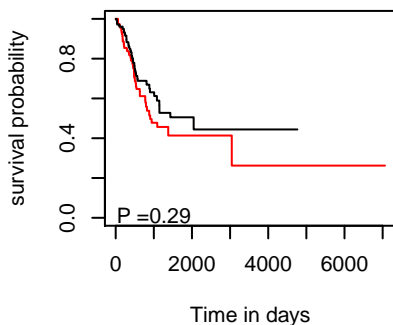**DFI hsa-mir-330**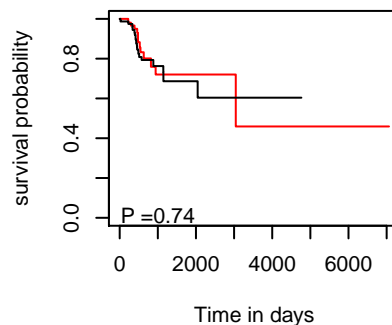**DSS hsa-mir-330**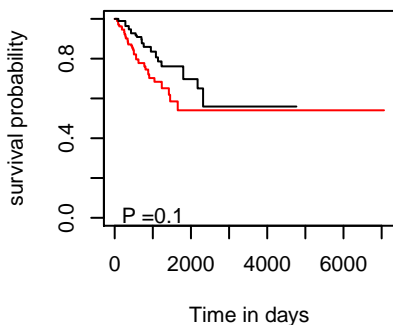**OS hsa-mir-99b**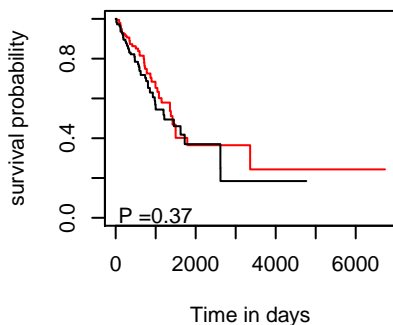**PFI hsa-mir-99b**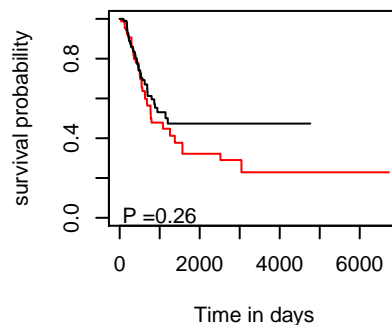



**DSS hsa-mir-133a-2**

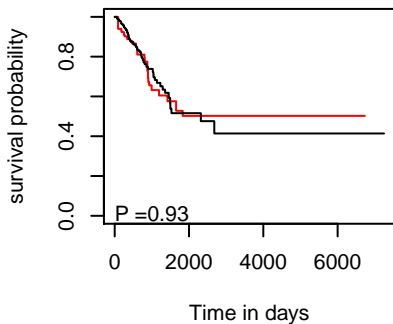

**OS hsa-mir-3610**

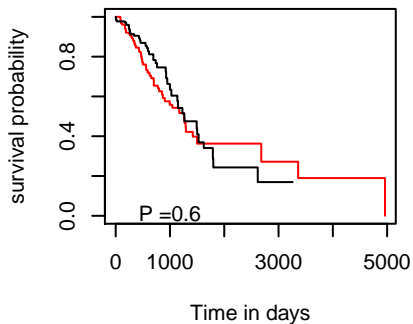

**PFI hsa-mir-3610**

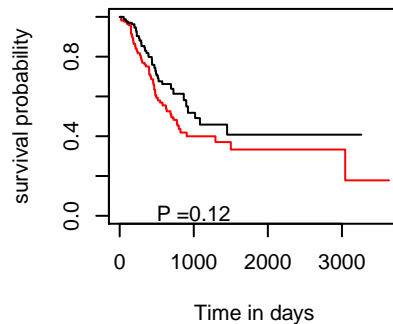

**DFI hsa-mir-3610**

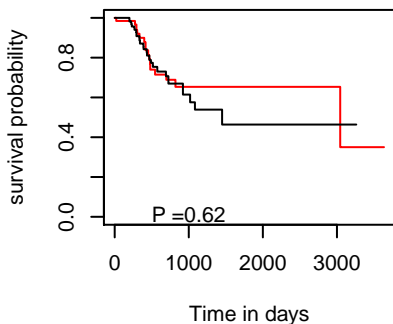

**DSS hsa-mir-3610**

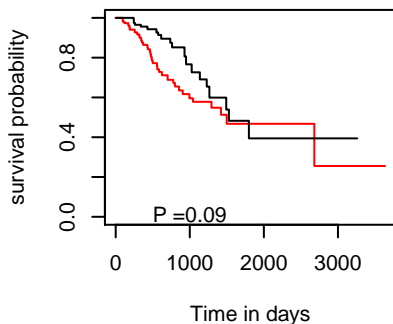

**OS hsa-mir-5001**

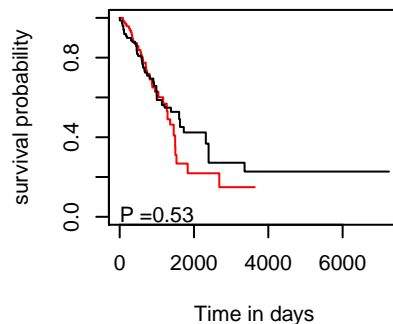

**PFI hsa-mir-5001**

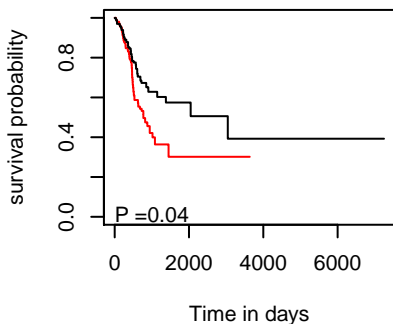

**DFI hsa-mir-5001**

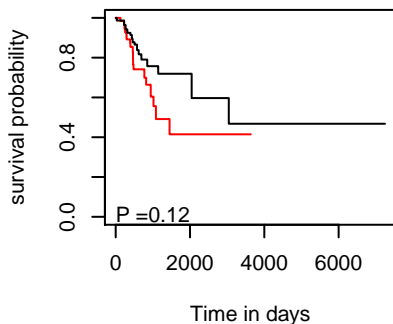

**DSS hsa-mir-5001**

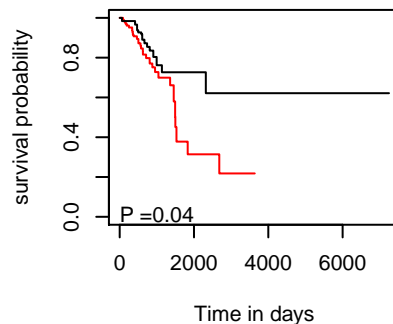

**OS hsa-mir-6755**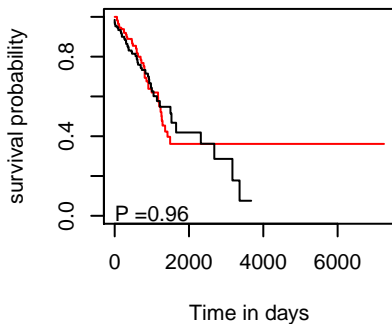**PFI hsa-mir-6755**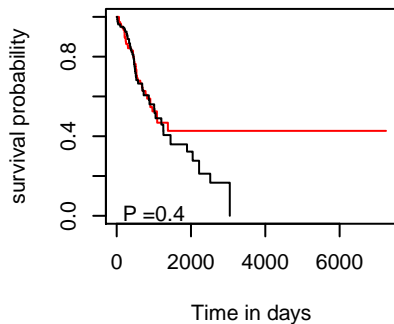**DFI hsa-mir-6755**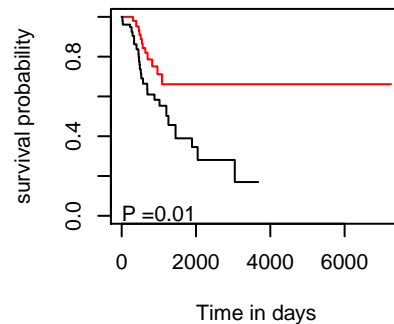**DSS hsa-mir-6755**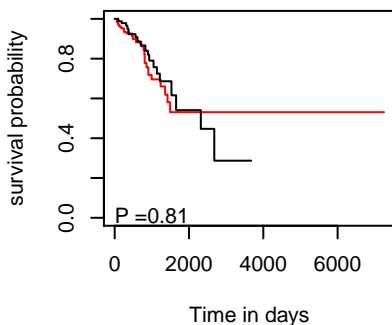**OS hsa-mir-6716**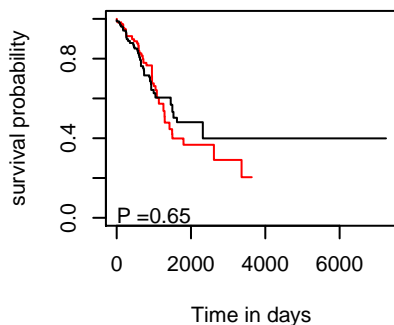**PFI hsa-mir-6716**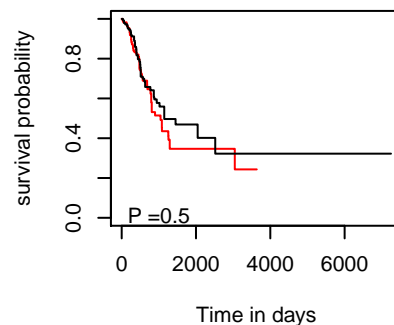**DFI hsa-mir-6716**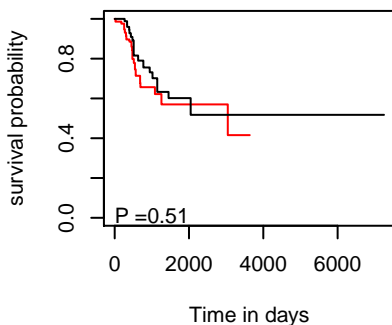**DSS hsa-mir-6716**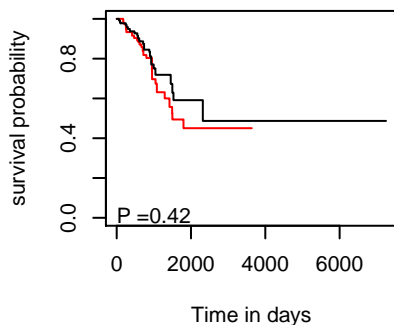**OS hsa-mir-4469**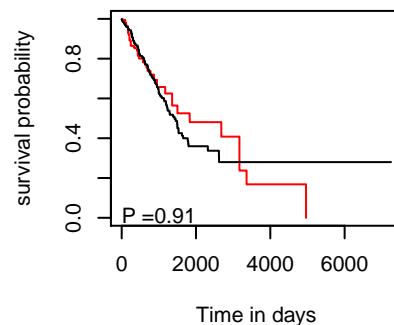

**PFI hsa-mir-4469**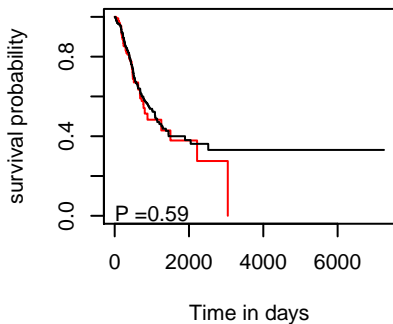**DFI hsa-mir-4469**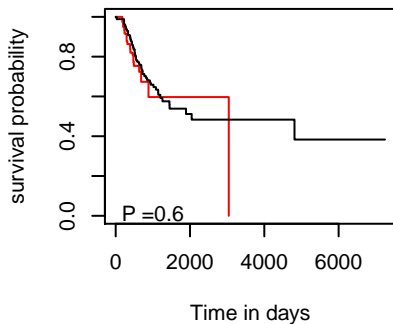**DSS hsa-mir-4469**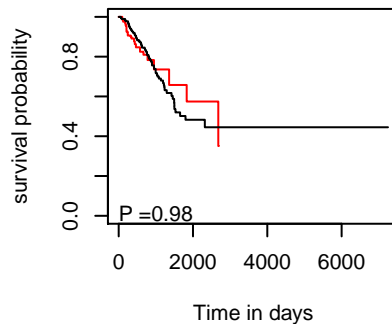**OS hsa-mir-3917**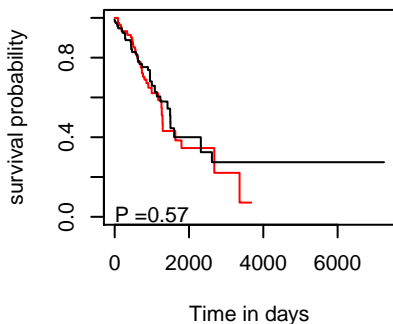**PFI hsa-mir-3917**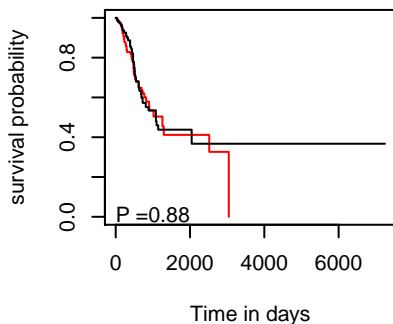**DFI hsa-mir-3917**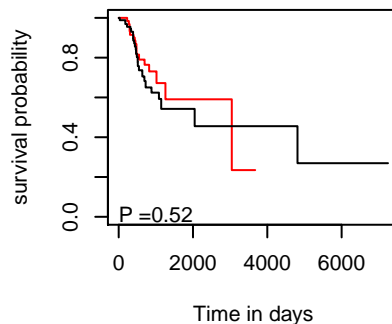**DSS hsa-mir-3917**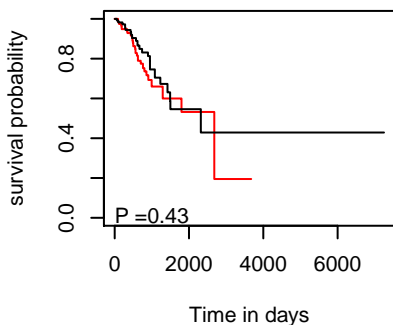**OS hsa-mir-551a**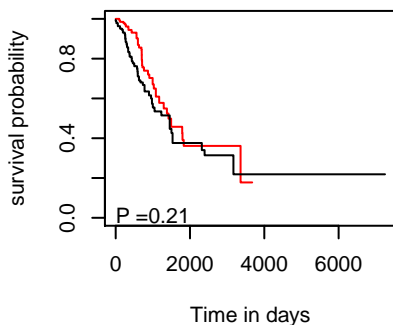**PFI hsa-mir-551a**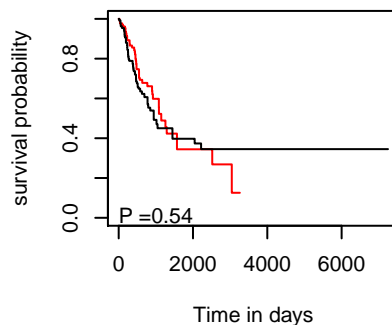

**DFI hsa-mir-551a**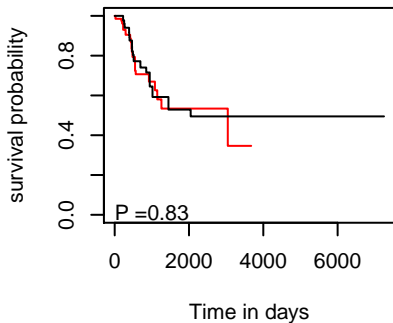**DSS hsa-mir-551a**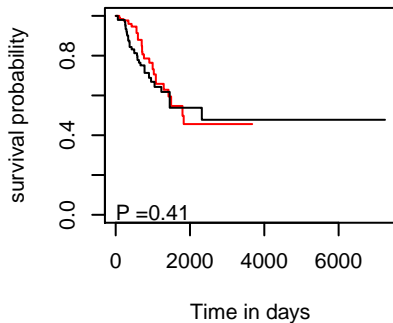**OS hsa-mir-7156**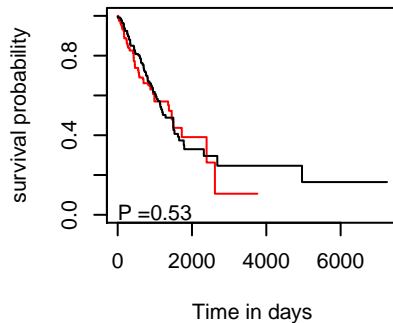**PFI hsa-mir-7156**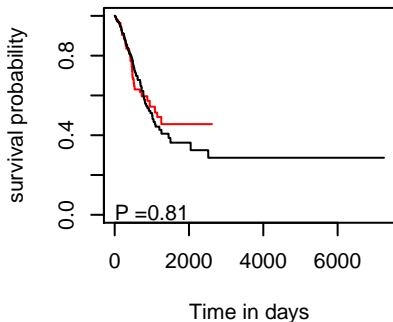**DFI hsa-mir-7156**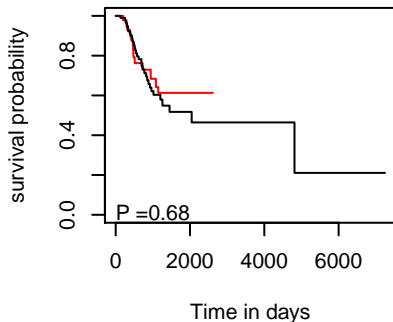**DSS hsa-mir-7156**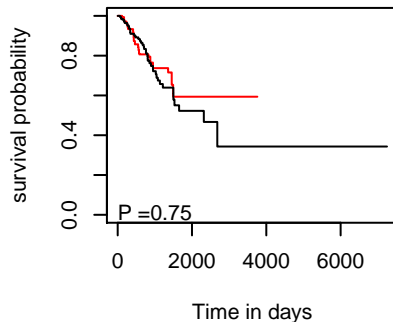**OS hsa-mir-301b**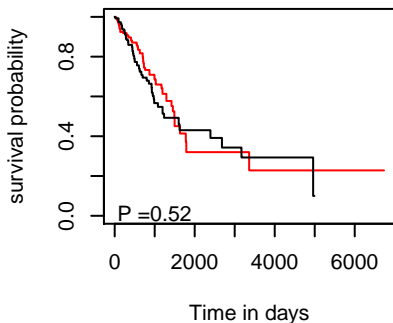**PFI hsa-mir-301b**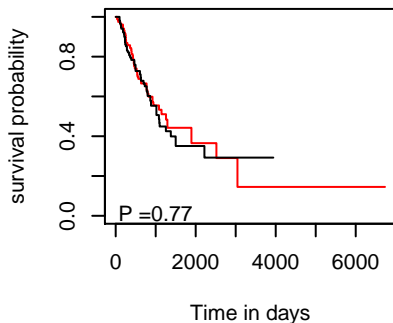**DFI hsa-mir-301b**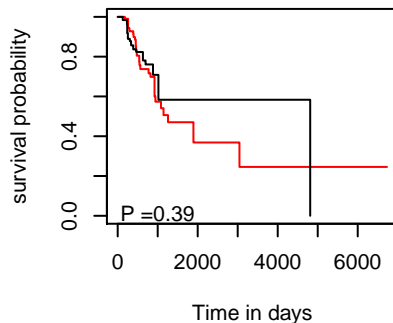

**DSS hsa-mir-301b**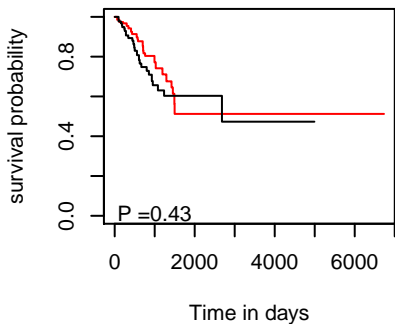**OS hsa-mir-570**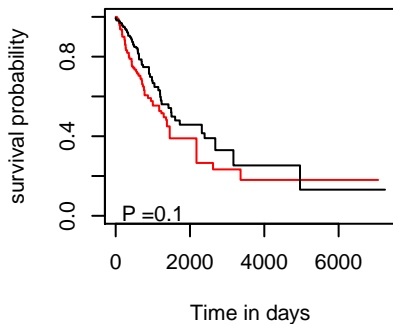**PFI hsa-mir-570**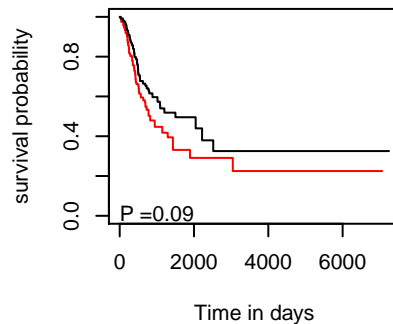**DFI hsa-mir-570**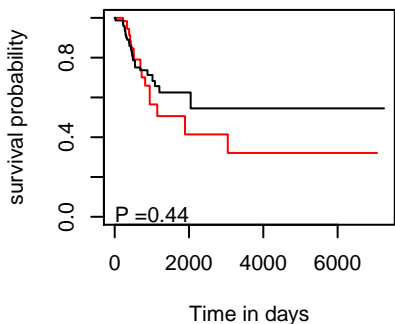**DSS hsa-mir-570**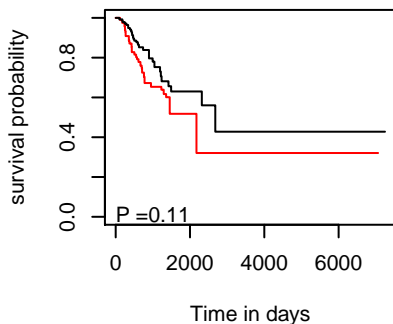**OS hsa-mir-5699**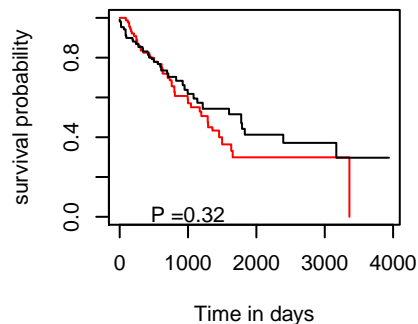**PFI hsa-mir-5699**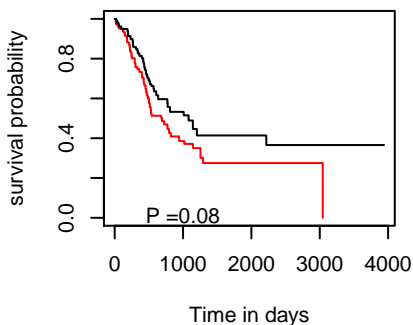**DFI hsa-mir-5699**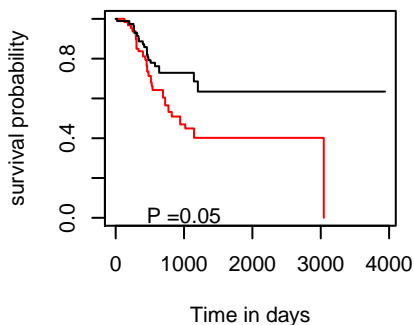**DSS hsa-mir-5699**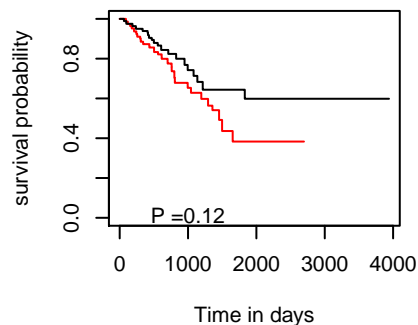

**OS hsa-mir-3183**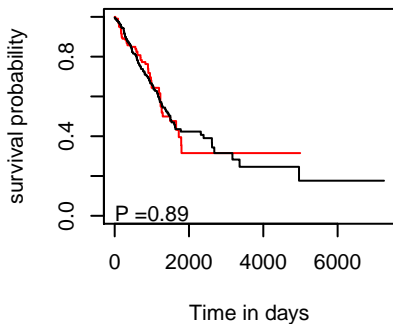**PFI hsa-mir-3183**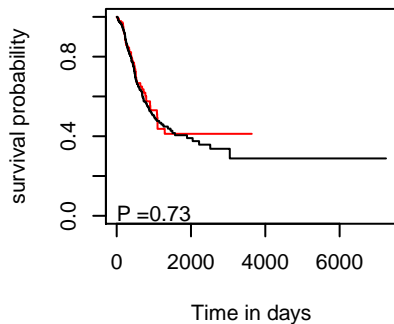**DFI hsa-mir-3183**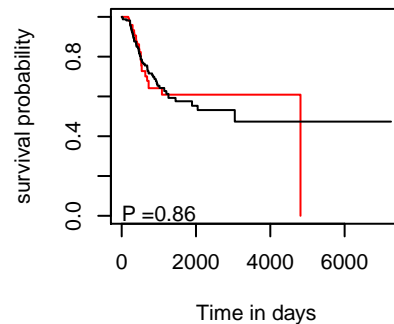**DSS hsa-mir-3183**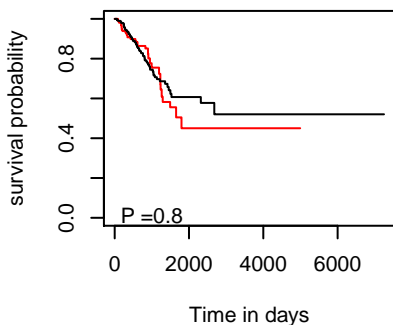**OS hsa-mir-624**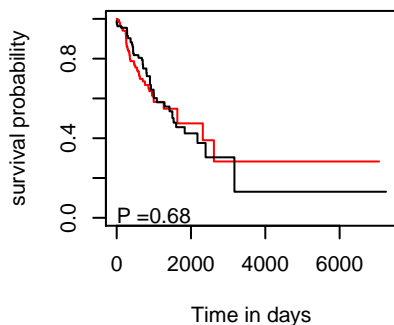**PFI hsa-mir-624**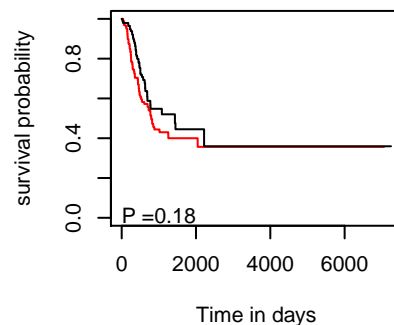**DFI hsa-mir-624**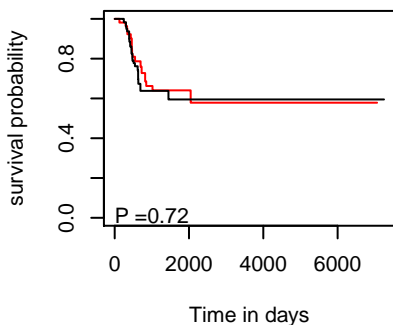**DSS hsa-mir-624**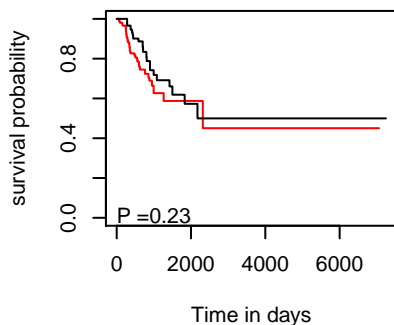**OS hsa-mir-2277**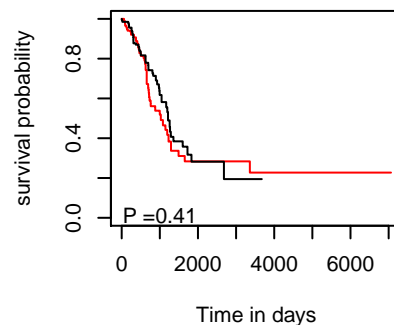

**PFI hsa-mir-2277**

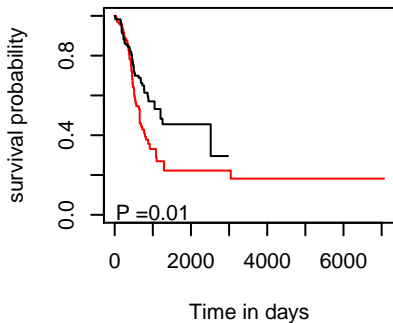

**DFI hsa-mir-2277**

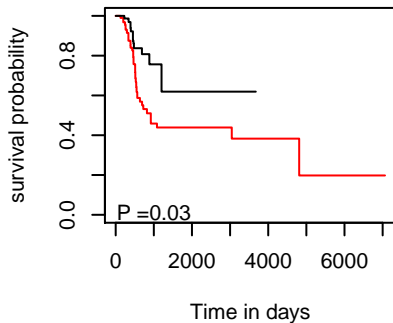

**DSS hsa-mir-2277**

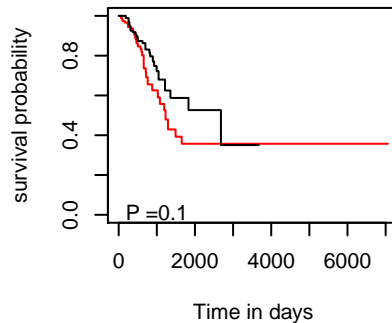

**OS hsa-mir-4533**

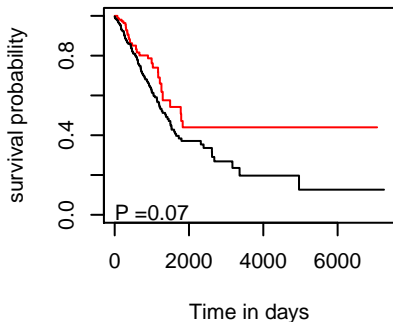

**PFI hsa-mir-4533**

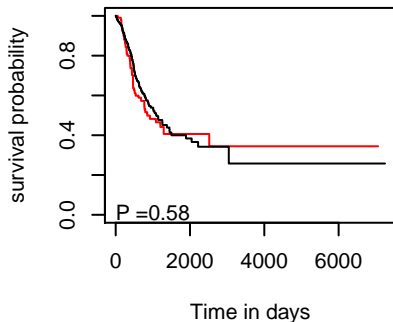

**DFI hsa-mir-4533**

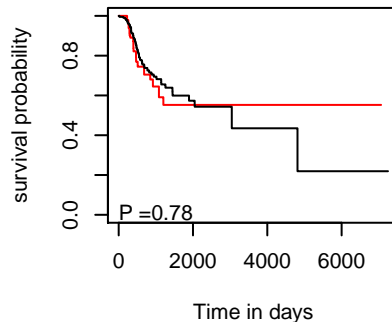

**DSS hsa-mir-4533**

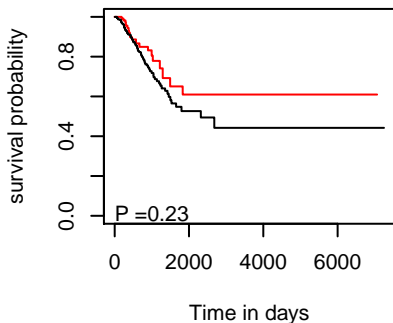

**OS hsa-mir-6125**

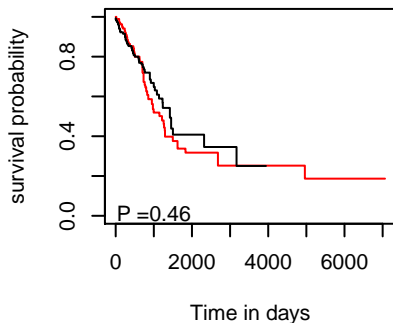

**PFI hsa-mir-6125**

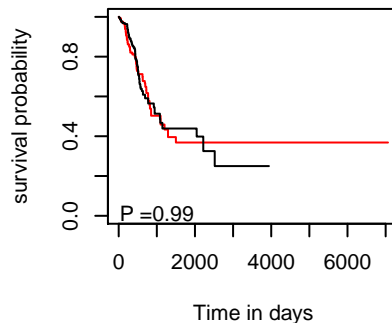

**DFI hsa-mir-6125**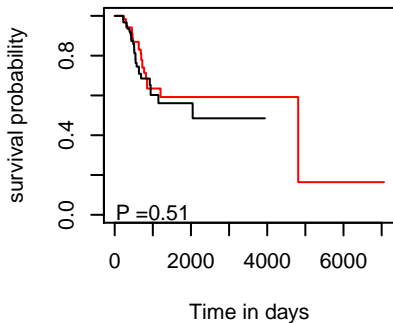**DSS hsa-mir-6125**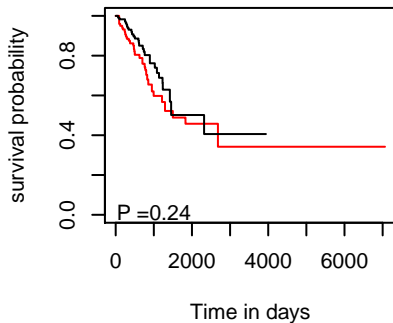**OS hsa-mir-7850**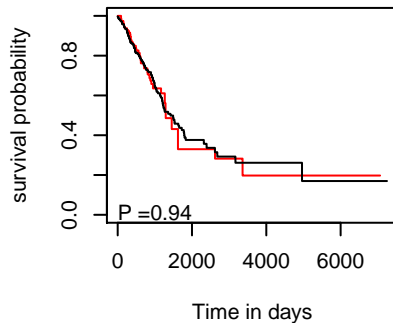**PFI hsa-mir-7850**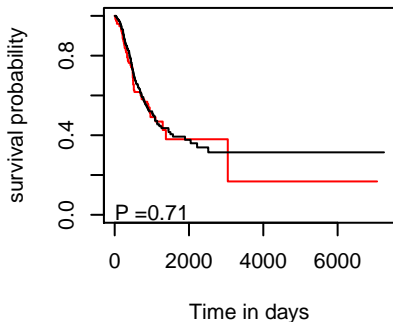**DFI hsa-mir-7850**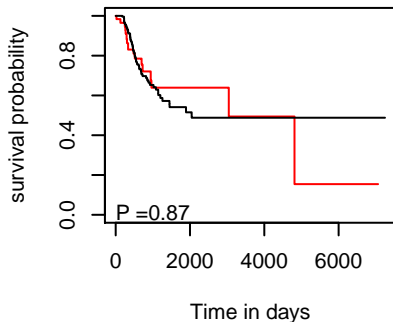**DSS hsa-mir-7850**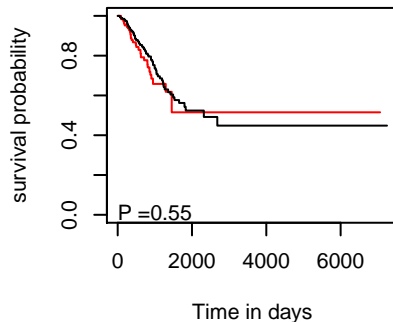**OS hsa-mir-6763**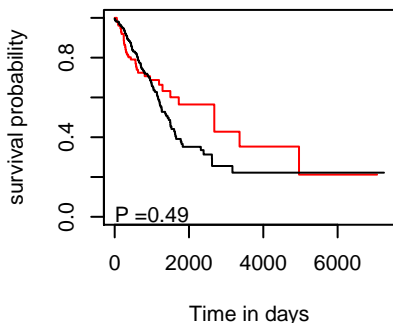**PFI hsa-mir-6763**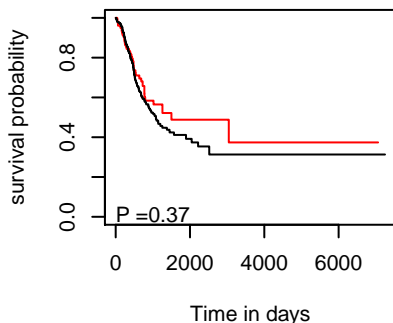**DFI hsa-mir-6763**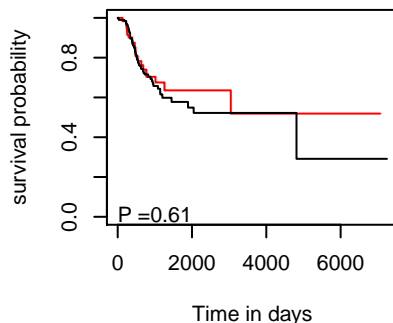



**OS hsa-mir-4665**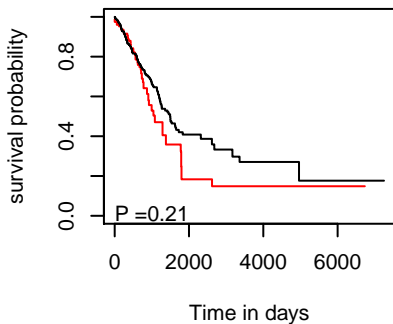**PFI hsa-mir-4665**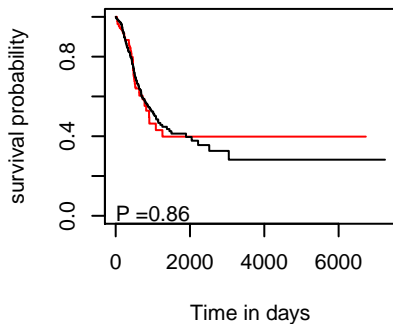**DFI hsa-mir-4665**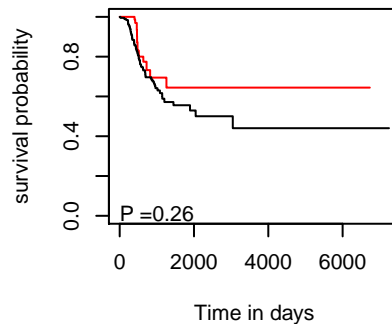**DSS hsa-mir-4665**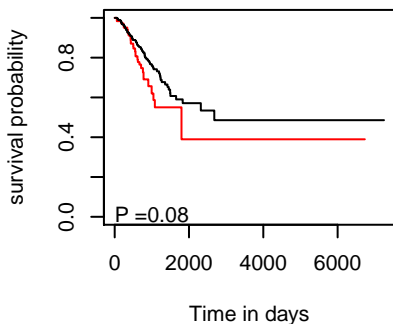**OS hsa-mir-874**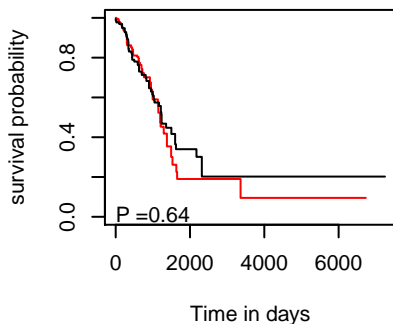**PFI hsa-mir-874**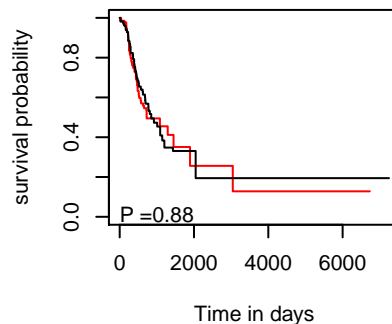**DFI hsa-mir-874**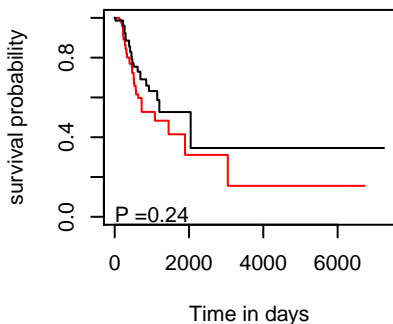**DSS hsa-mir-874**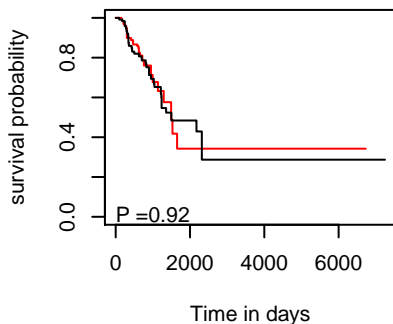**OS hsa-mir-149**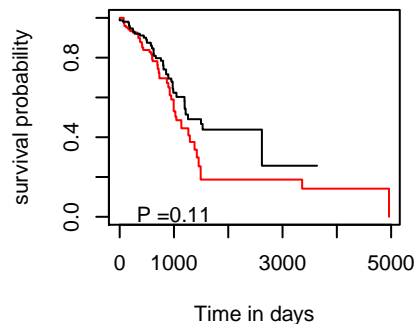

**PFI hsa-mir-149**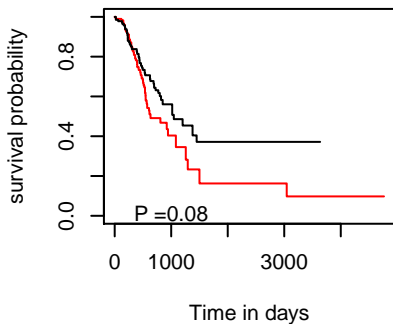**DFI hsa-mir-149**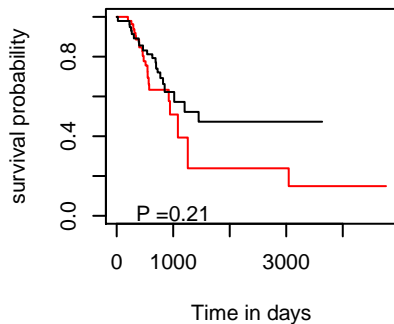**DSS hsa-mir-149**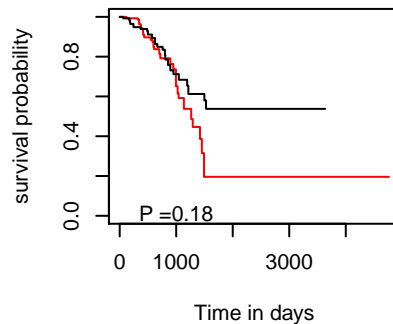**OS hsa-mir-320d-1**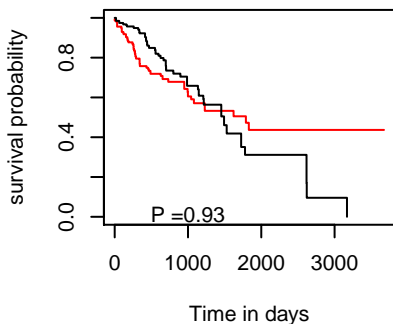**PFI hsa-mir-320d-1**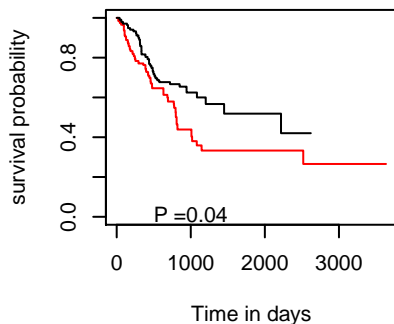**DFI hsa-mir-320d-1**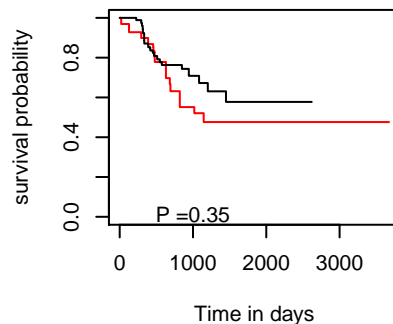**DSS hsa-mir-320d-1**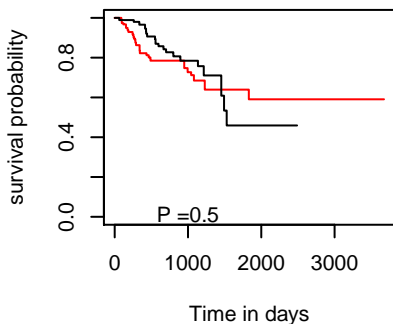**OS hsa-mir-1227**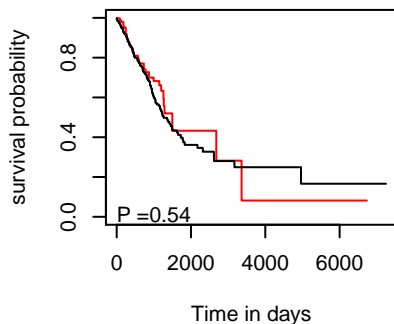**PFI hsa-mir-1227**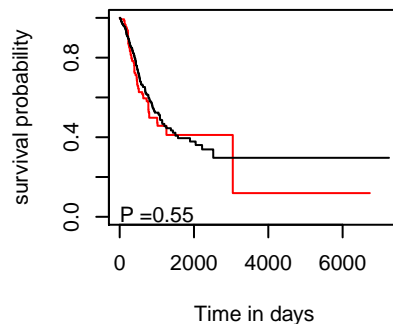

**DFI hsa-mir-1227**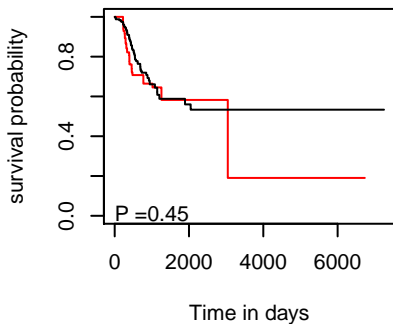**DSS hsa-mir-1227**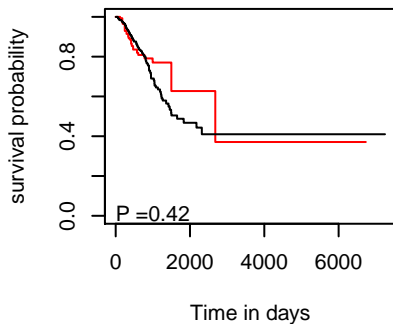**OS hsa-mir-548k**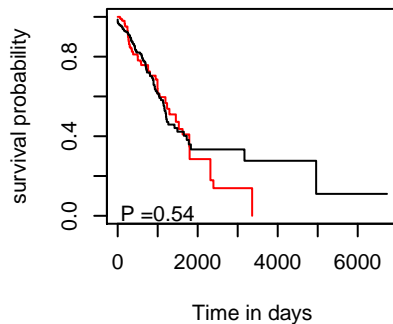**PFI hsa-mir-548k**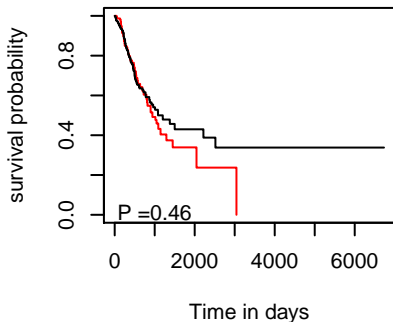**DFI hsa-mir-548k**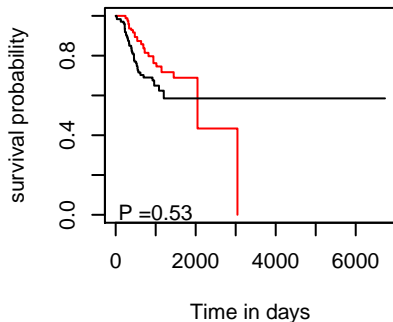**DSS hsa-mir-548k**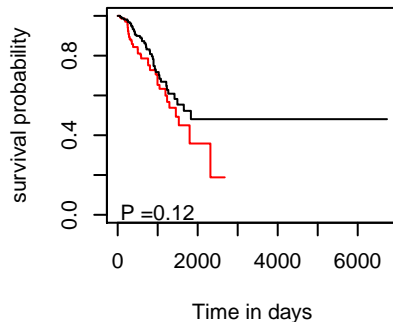**OS hsa-mir-125b-1**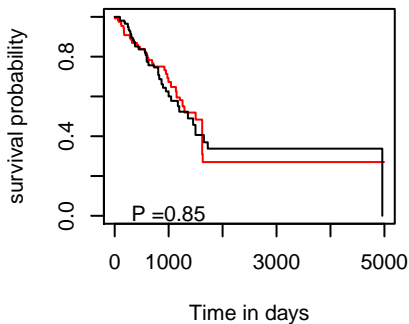**PFI hsa-mir-125b-1**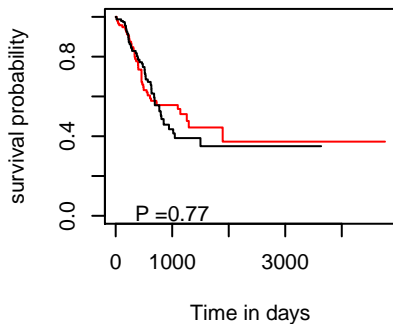**DFI hsa-mir-125b-1**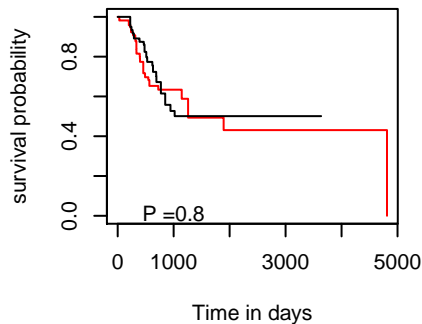

**DSS hsa-mir-125b-1**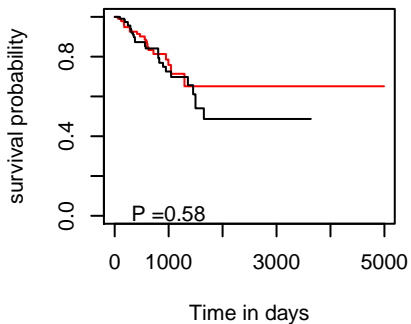**OS hsa-mir-16-1**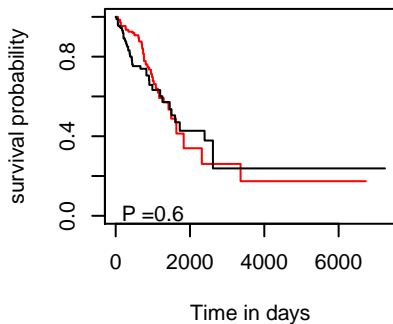**PFI hsa-mir-16-1**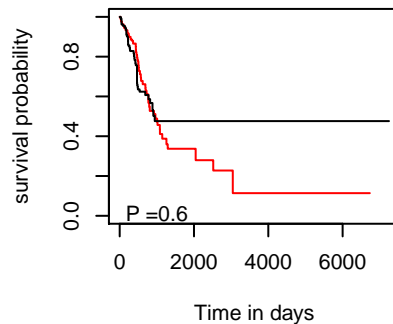**DFI hsa-mir-16-1**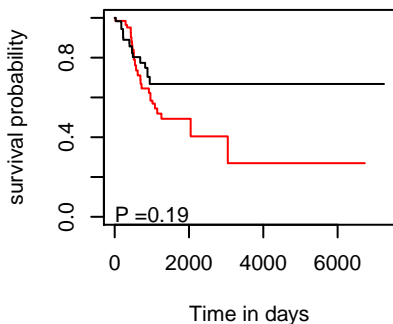**DSS hsa-mir-16-1**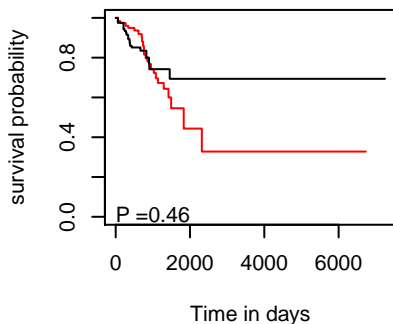**OS hsa-mir-26a-2**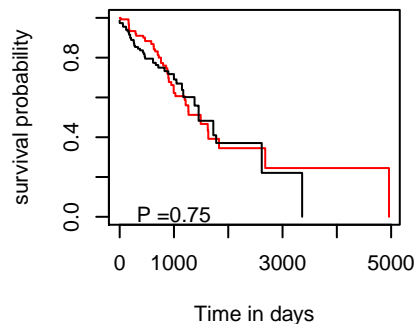**PFI hsa-mir-26a-2**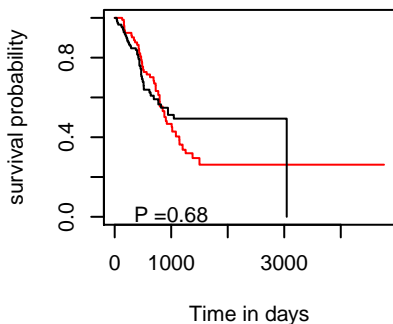**DFI hsa-mir-26a-2**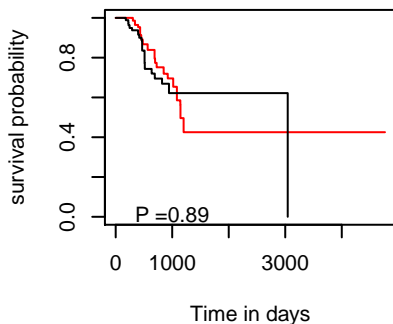**DSS hsa-mir-26a-2**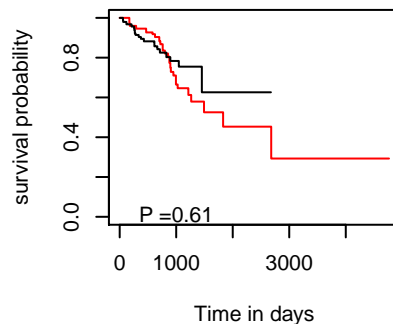

**OS hsa-mir-4474**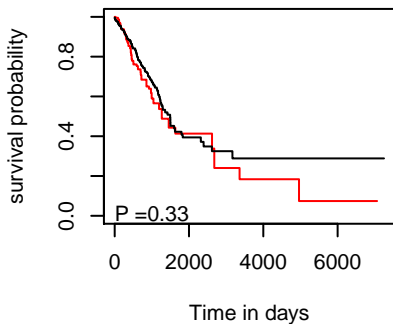**PFI hsa-mir-4474**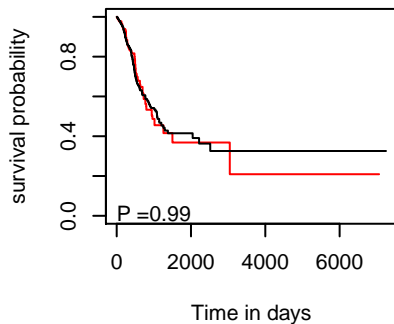**DFI hsa-mir-4474**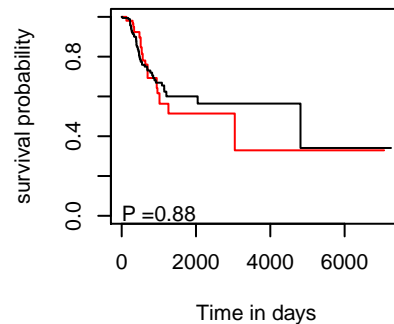**DSS hsa-mir-4474**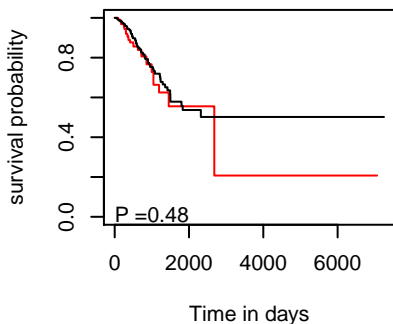**OS hsa-mir-548au**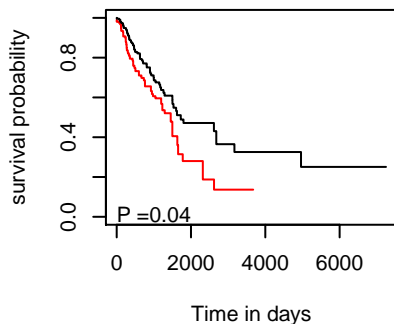**PFI hsa-mir-548au**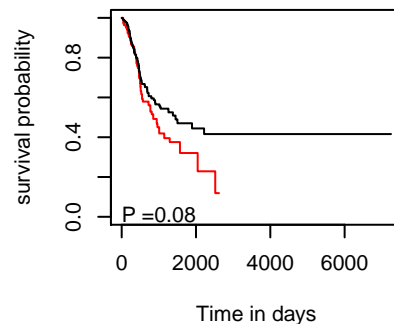**DFI hsa-mir-548au**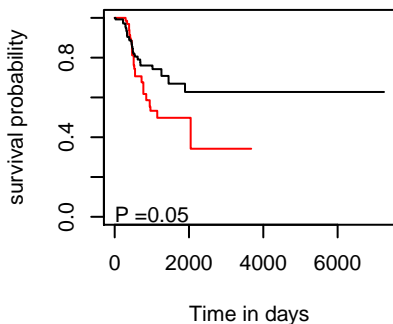**DSS hsa-mir-548au**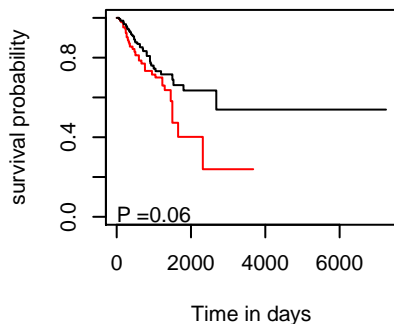**OS hsa-mir-616**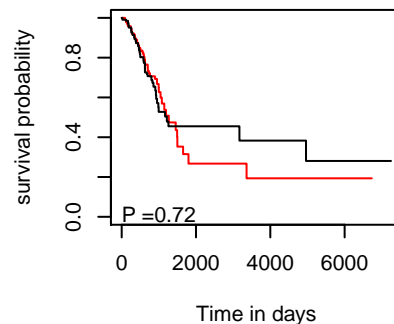

**PFI hsa-mir-616**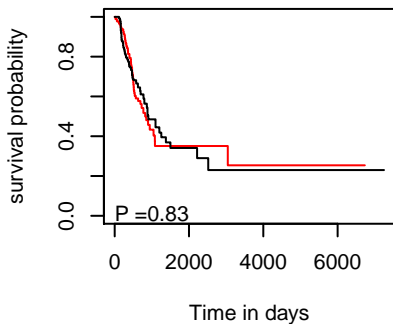**DFI hsa-mir-616**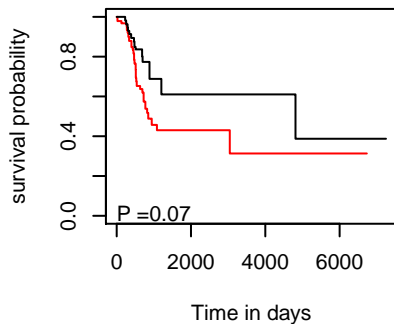**DSS hsa-mir-616**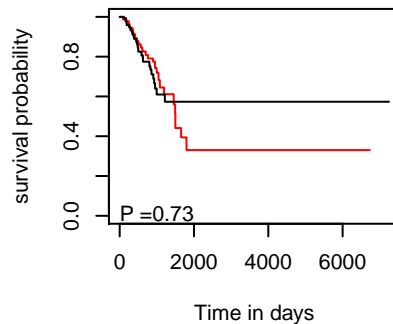**OS hsa-mir-1248**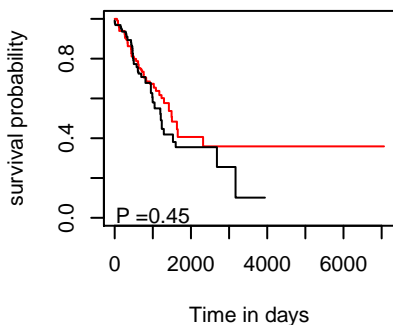**PFI hsa-mir-1248**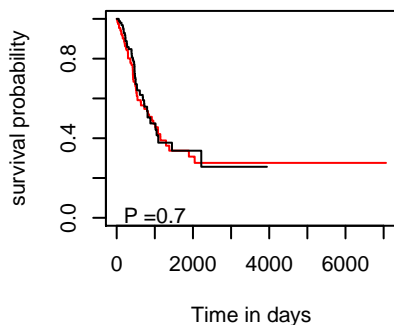**DFI hsa-mir-1248**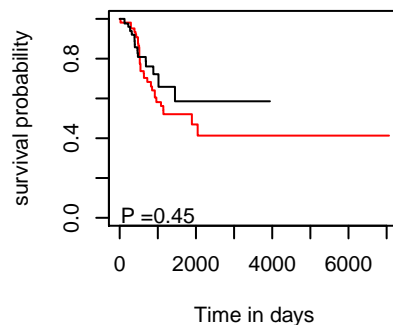**DSS hsa-mir-1248**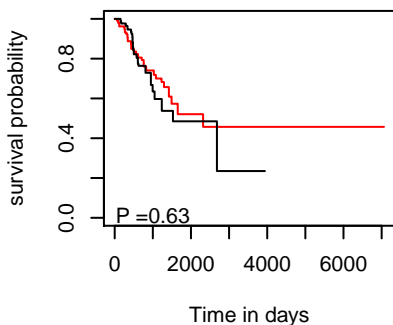**OS hsa-mir-4738**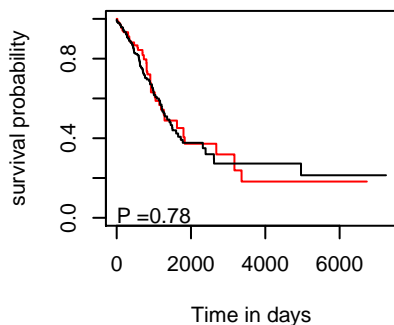**PFI hsa-mir-4738**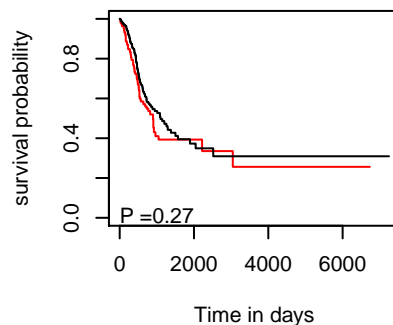

**DFI hsa-mir-4738**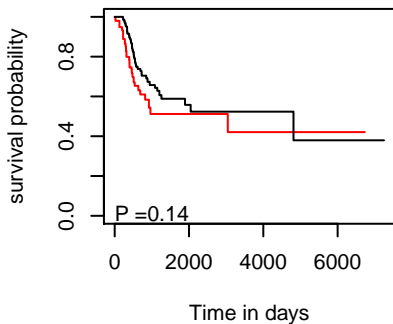**DSS hsa-mir-4738**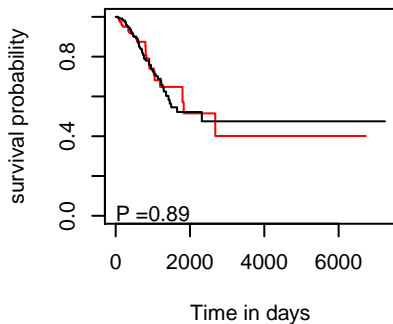**OS hsa-mir-6860**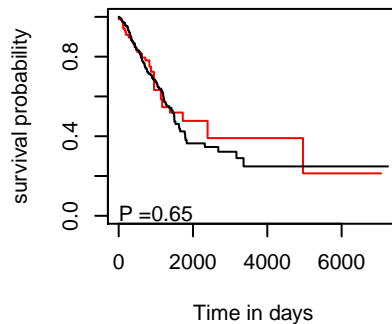**PFI hsa-mir-6860**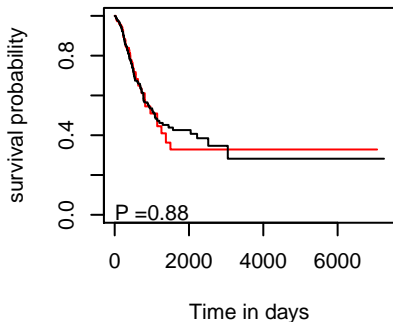**DFI hsa-mir-6860**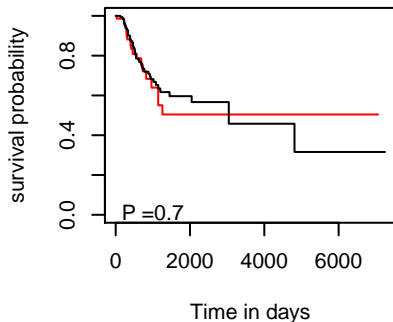**DSS hsa-mir-6860**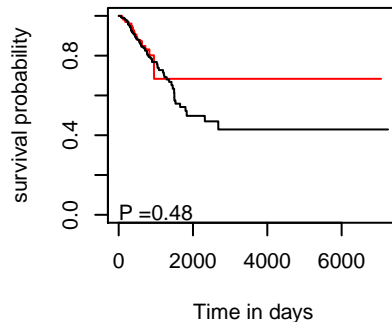**OS hsa-mir-6502**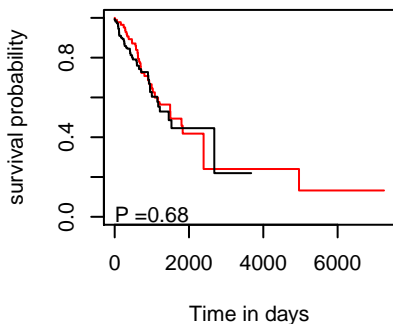**PFI hsa-mir-6502**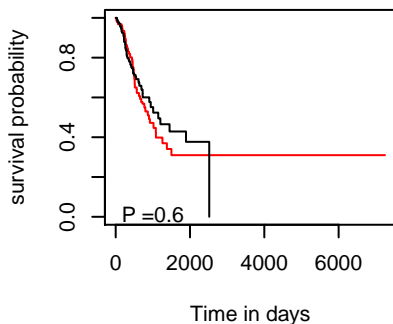**DFI hsa-mir-6502**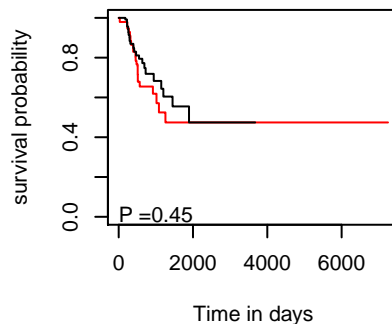

**DSS hsa-mir-6502**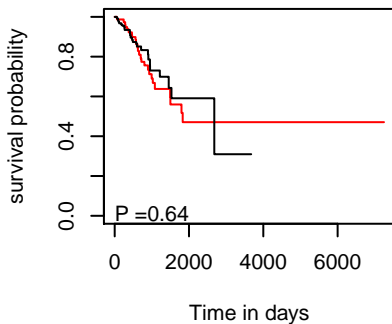**OS hsa-mir-197**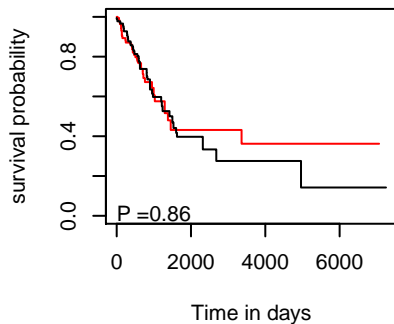**PFI hsa-mir-197**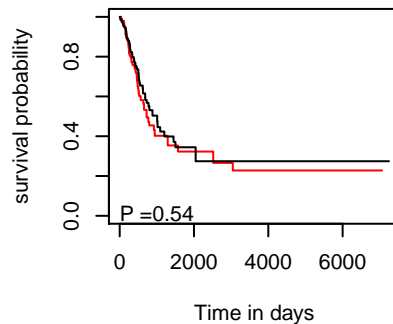**DFI hsa-mir-197**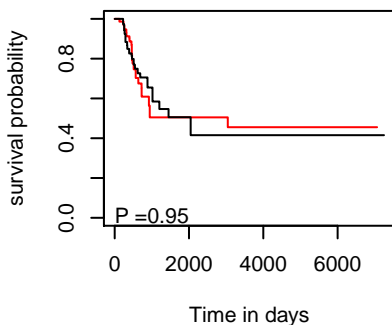**DSS hsa-mir-197**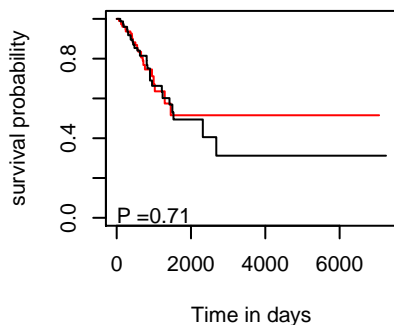**OS hsa-mir-1306**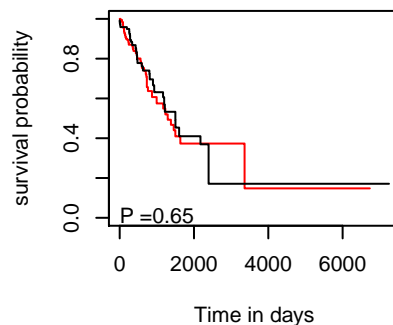**PFI hsa-mir-1306**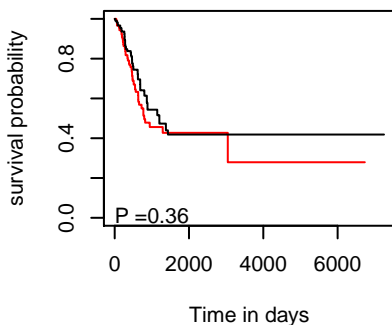**DFI hsa-mir-1306**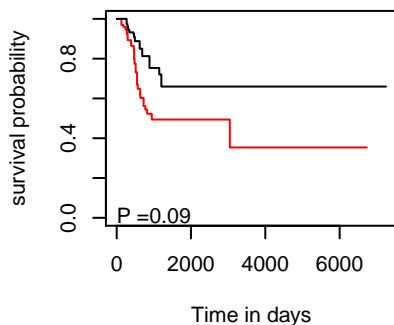**DSS hsa-mir-1306**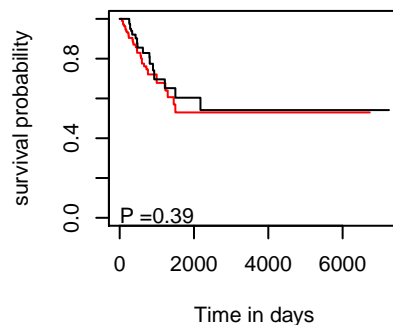

**OS hsa-mir-5571**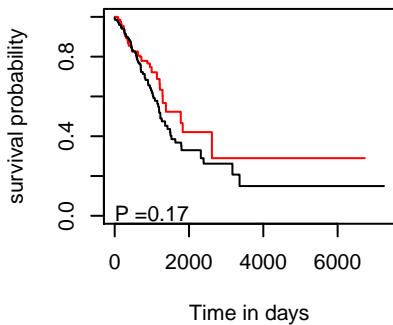**PFI hsa-mir-5571**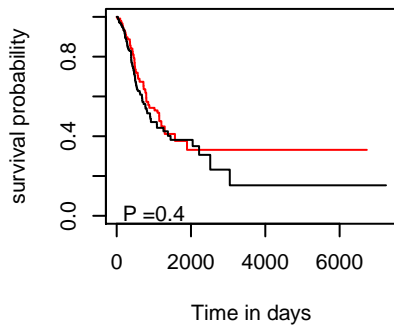**DFI hsa-mir-5571**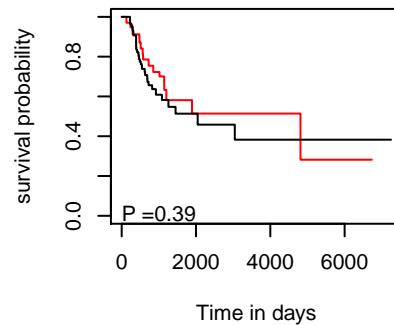**DSS hsa-mir-5571**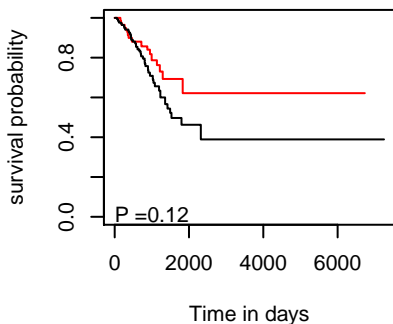**OS hsa-mir-887**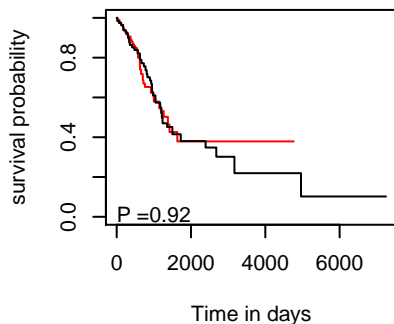**PFI hsa-mir-887**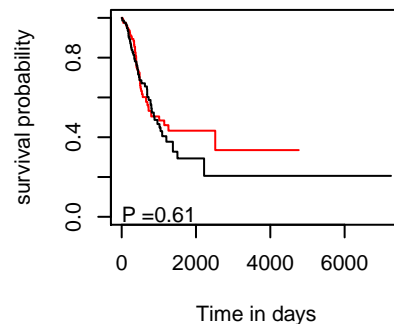**DFI hsa-mir-887**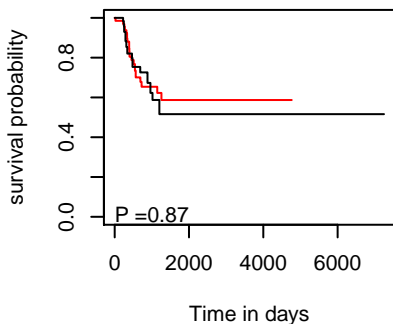**DSS hsa-mir-887**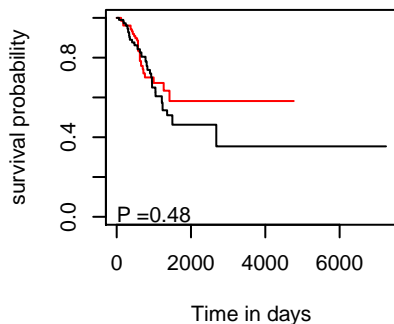**OS hsa-mir-643**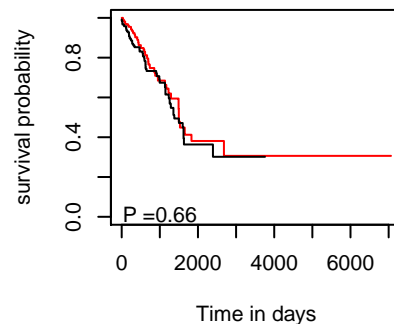

**PFI hsa-mir-643**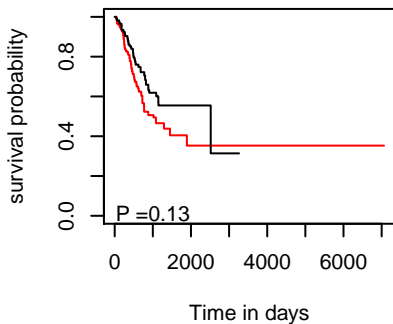**DFI hsa-mir-643**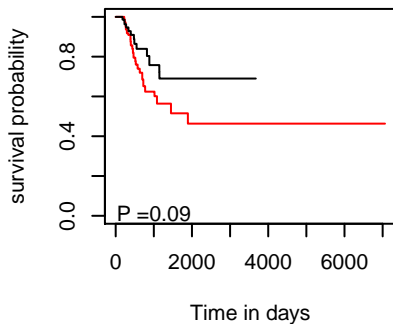**DSS hsa-mir-643**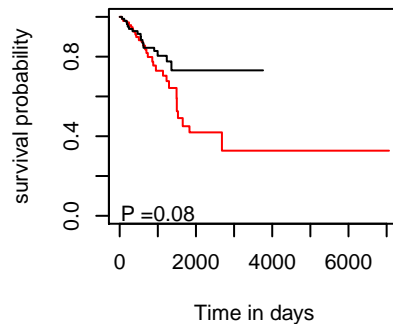**OS hsa-mir-3923**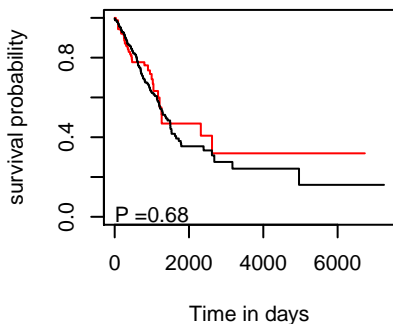**PFI hsa-mir-3923**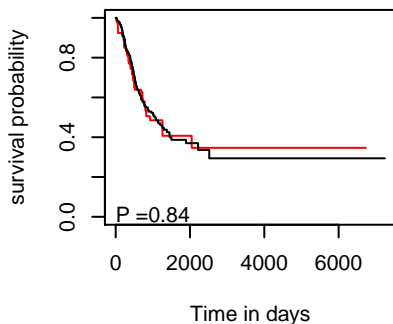**DFI hsa-mir-3923**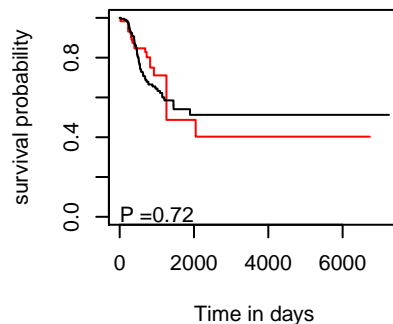**DSS hsa-mir-3923**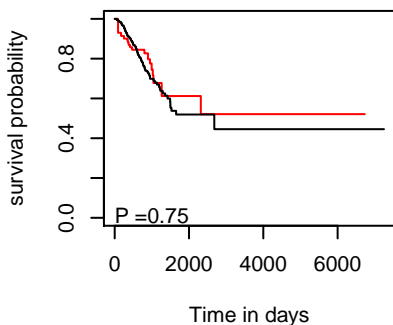**OS hsa-mir-4662a**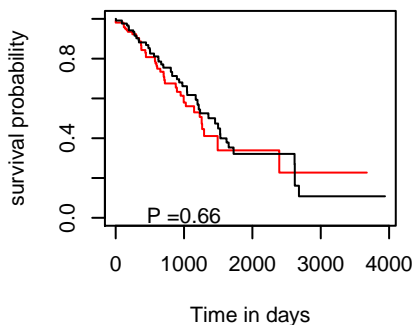**PFI hsa-mir-4662a**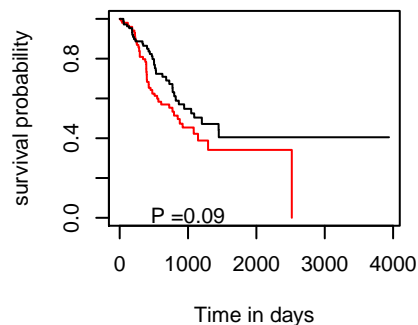

**DFI hsa-mir-4662a**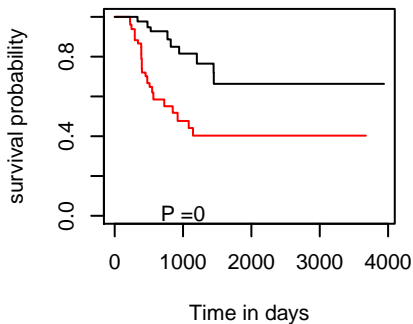**DSS hsa-mir-4662a**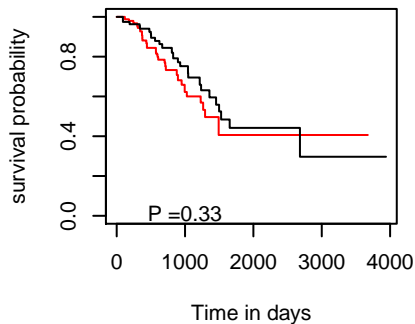**OS hsa-mir-5687**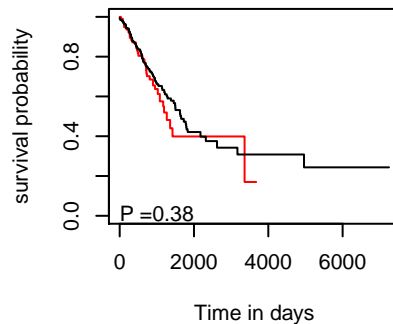**PFI hsa-mir-5687**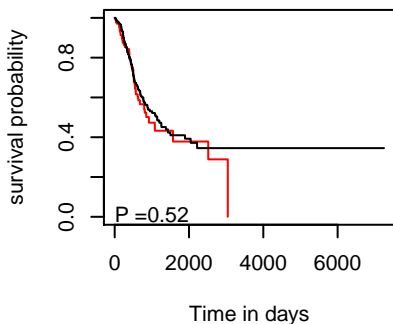**DFI hsa-mir-5687**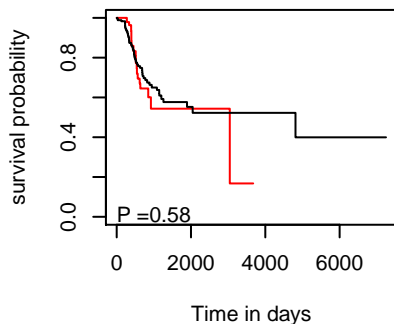**DSS hsa-mir-5687**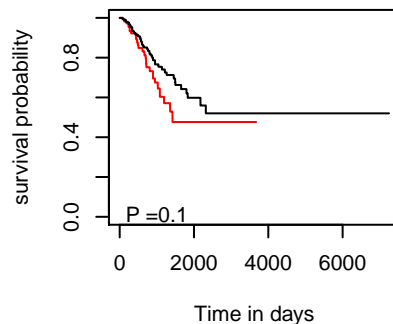**OS hsa-mir-580**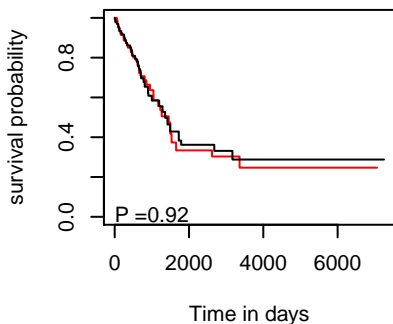**PFI hsa-mir-580**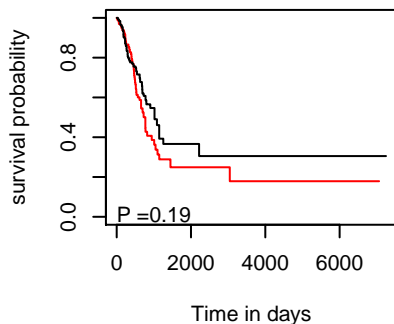**DFI hsa-mir-580**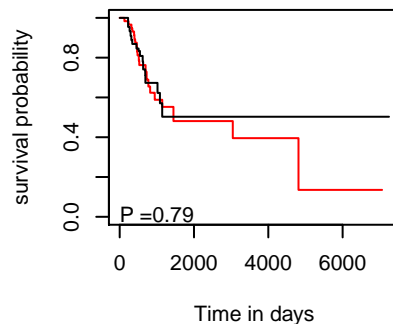

**DSS hsa-mir-580**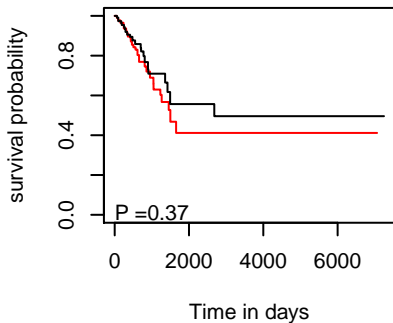**OS hsa-mir-9-2**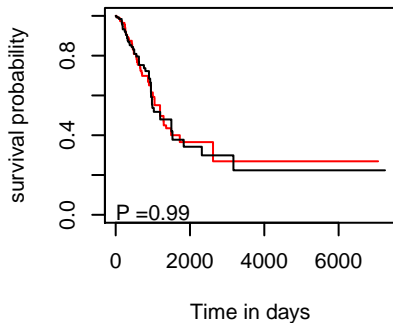**PFI hsa-mir-9-2**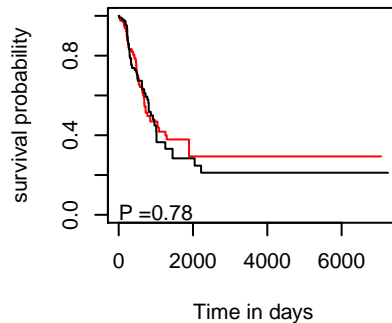**DFI hsa-mir-9-2**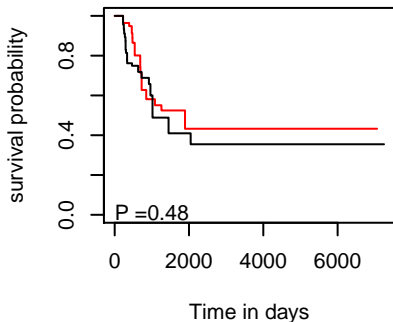**DSS hsa-mir-9-2**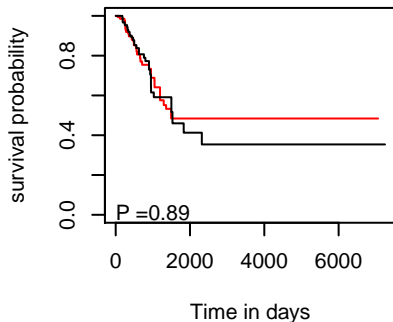**OS hsa-mir-4326**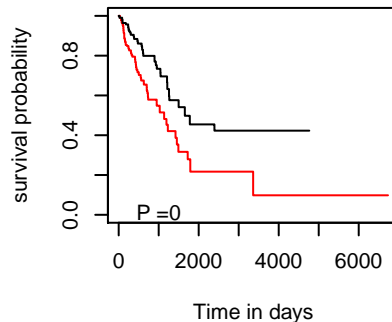**PFI hsa-mir-4326**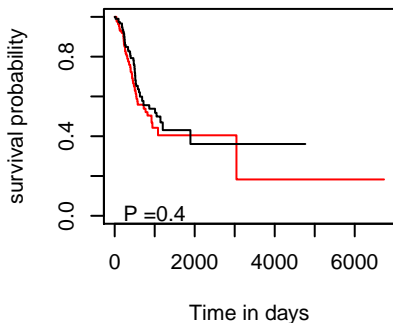**DFI hsa-mir-4326**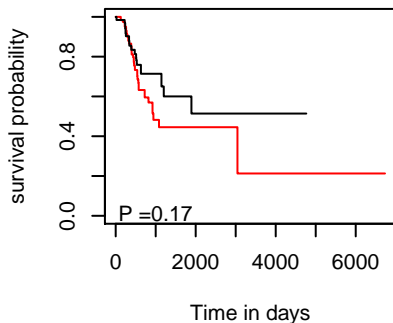**DSS hsa-mir-4326**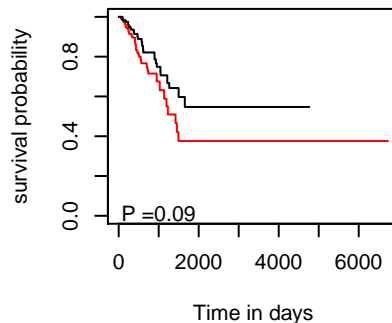

**OS hsa-mir-6510**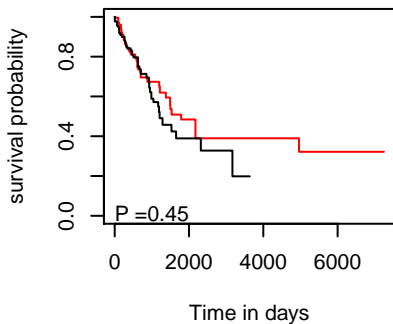**PFI hsa-mir-6510**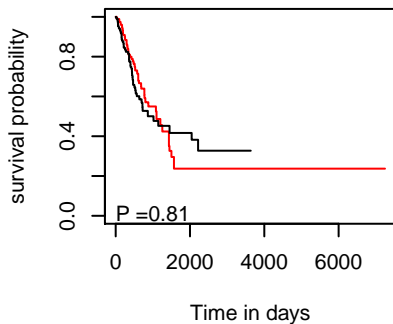**DFI hsa-mir-6510**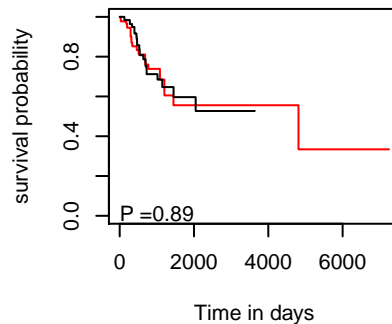**DSS hsa-mir-6510**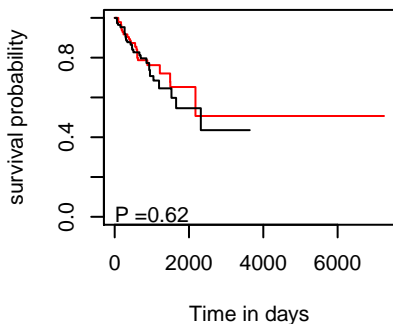**OS hsa-mir-9-1**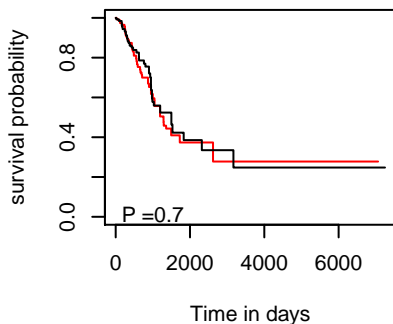**PFI hsa-mir-9-1**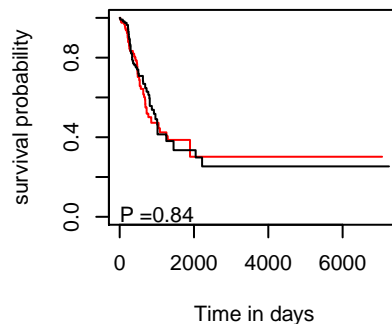**DFI hsa-mir-9-1**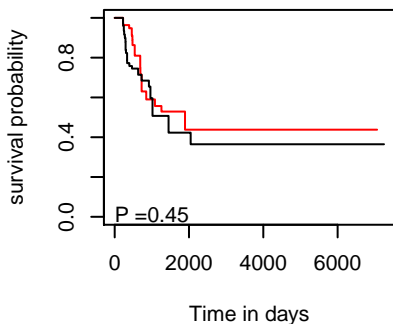**DSS hsa-mir-9-1**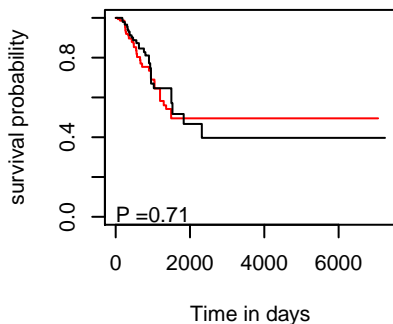**OS hsa-mir-548ag-2**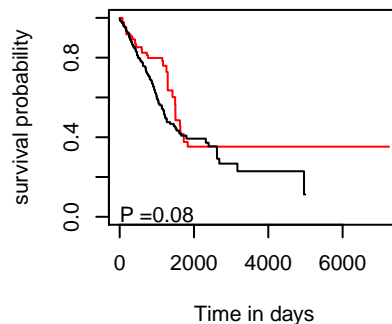

**PFI hsa-mir-548ag-2**

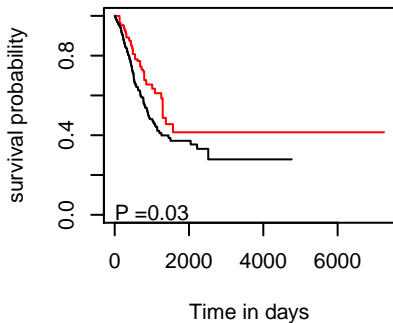

**DFI hsa-mir-548ag-2**

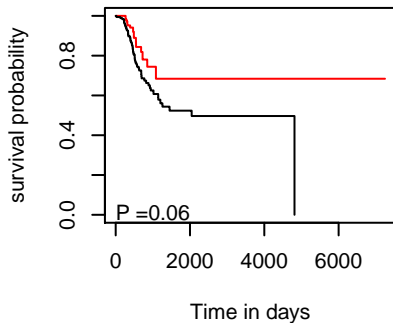

**DSS hsa-mir-548ag-2**

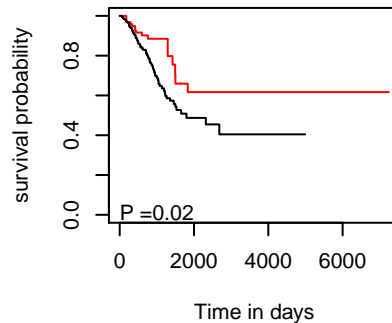

**OS hsa-mir-4636**

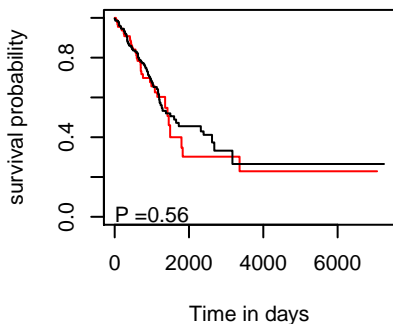

**PFI hsa-mir-4636**

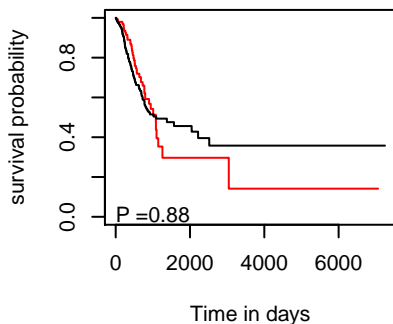

**DFI hsa-mir-4636**

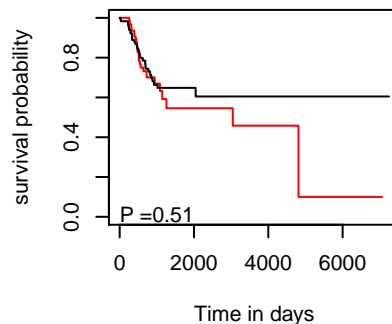

**DSS hsa-mir-4636**

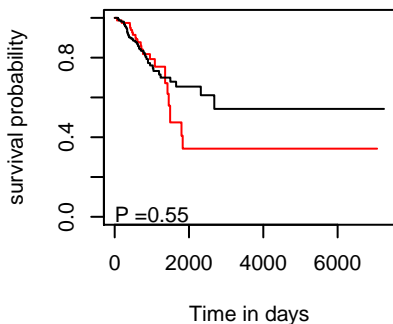

**OS hsa-mir-548t**

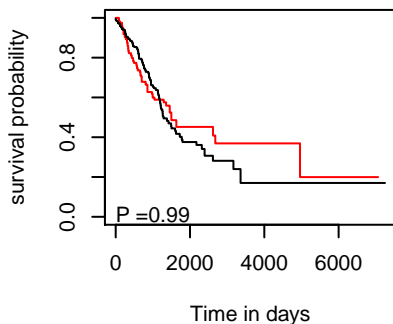

**PFI hsa-mir-548t**

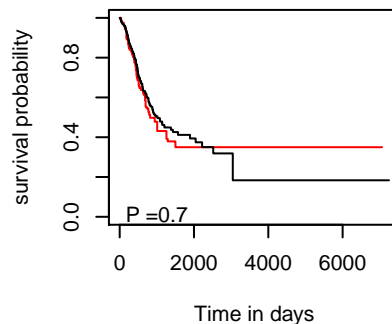

**DFI hsa-mir-548t**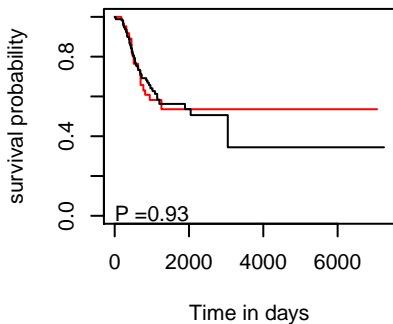**DSS hsa-mir-548t**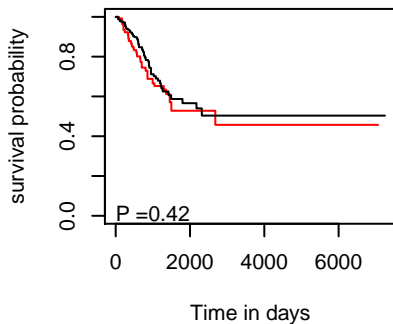**OS hsa-mir-137**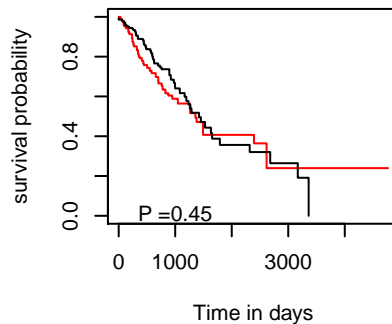**PFI hsa-mir-137**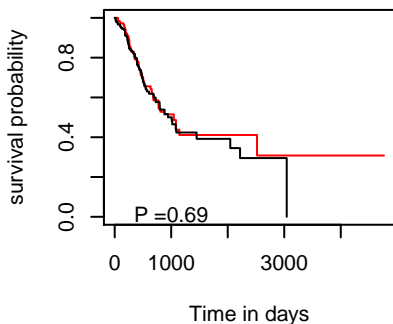**DFI hsa-mir-137**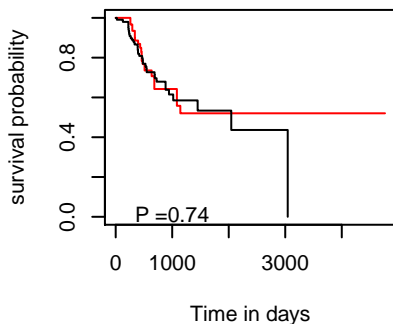**DSS hsa-mir-137**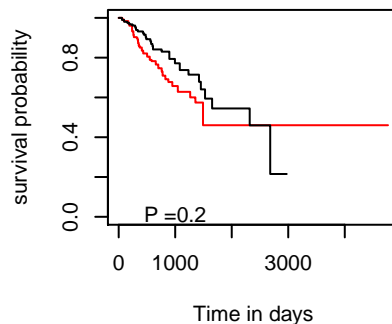**OS hsa-mir-449a**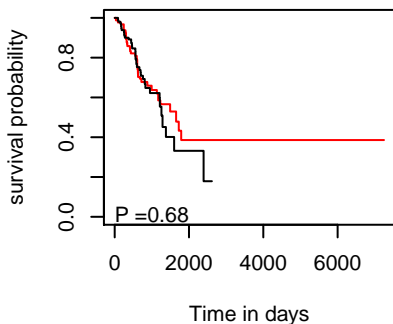**PFI hsa-mir-449a**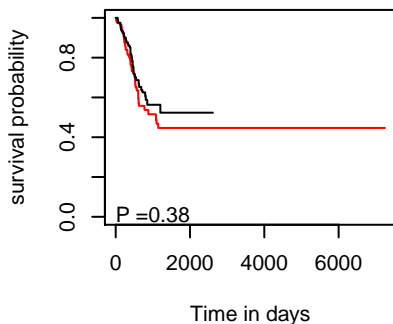**DFI hsa-mir-449a**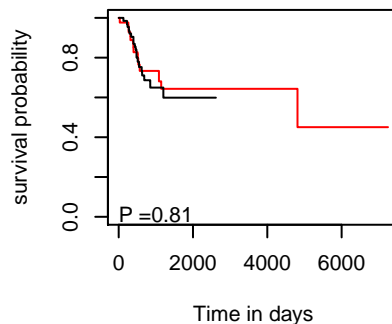

**DSS hsa-mir-449a**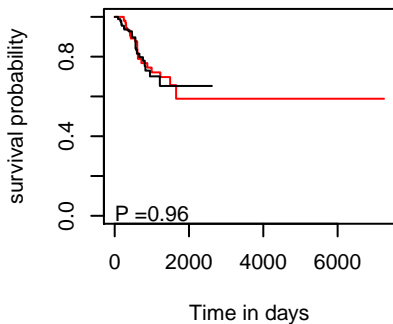**OS hsa-mir-100**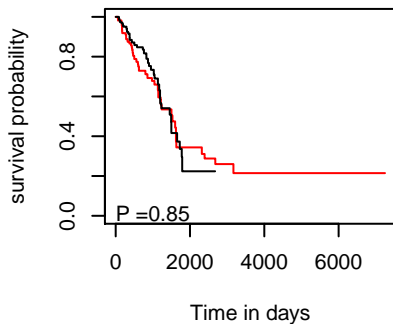**PFI hsa-mir-100**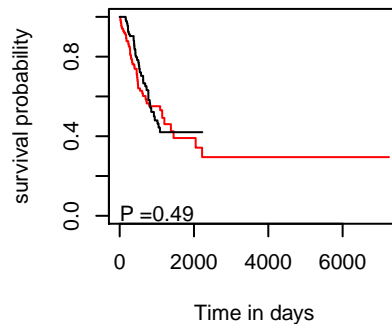**DFI hsa-mir-100**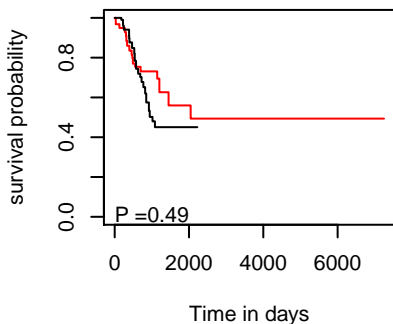**DSS hsa-mir-100**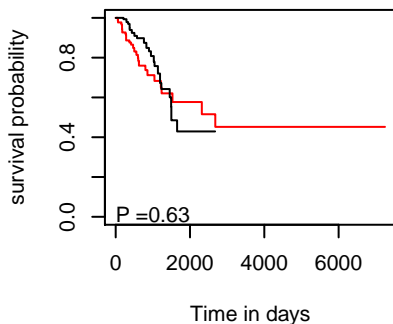**OS hsa-mir-5588**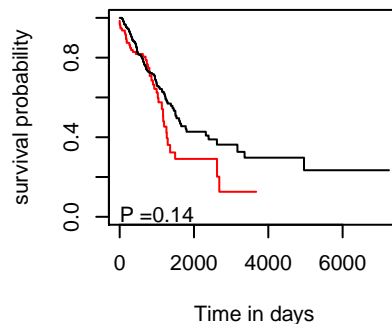**PFI hsa-mir-5588**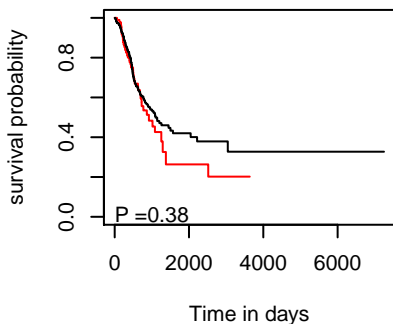**DFI hsa-mir-5588**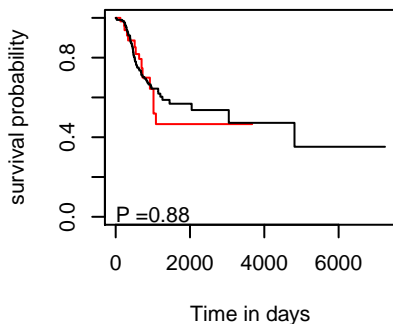**DSS hsa-mir-5588**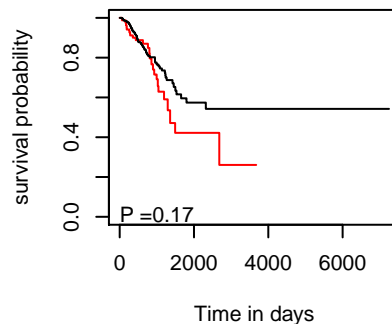

**OS hsa-mir-3193**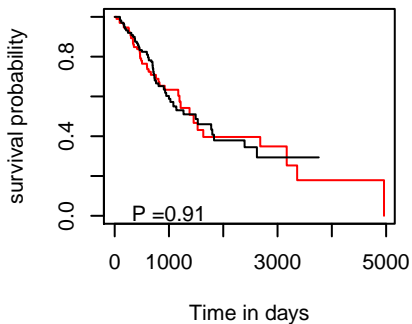**PFI hsa-mir-3193**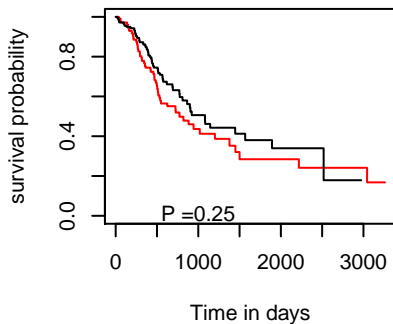**DFI hsa-mir-3193**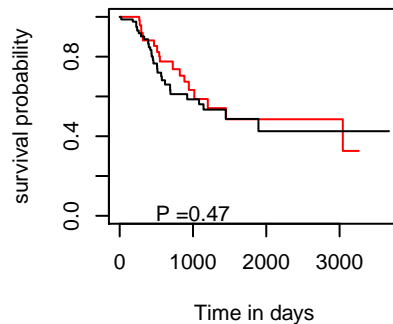**DSS hsa-mir-3193**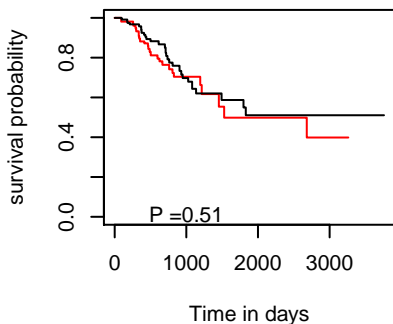**OS hsa-let-7i**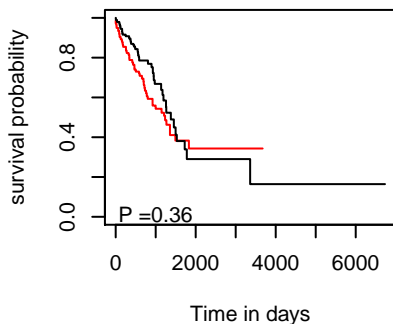**PFI hsa-let-7i**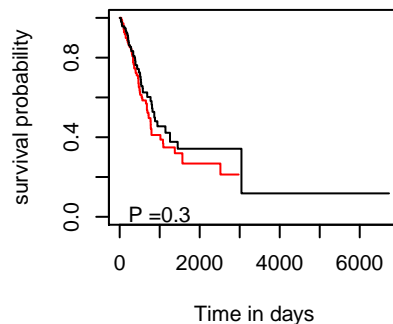**DFI hsa-let-7i**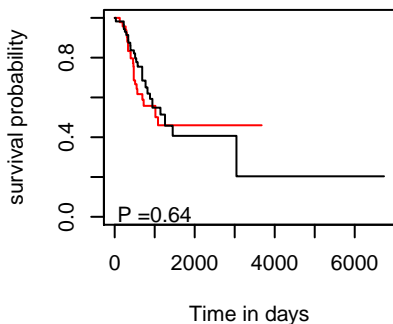**DSS hsa-let-7i**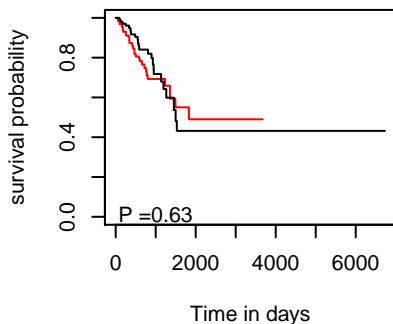**OS hsa-mir-101-2**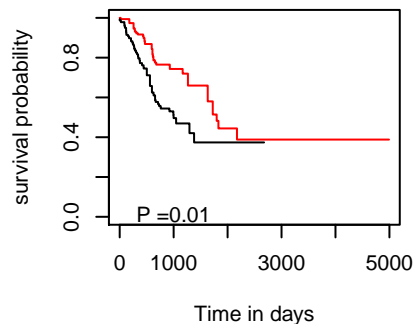

**PFI hsa-mir-101-2**

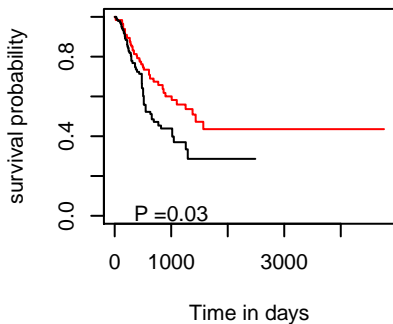

**DFI hsa-mir-101-2**

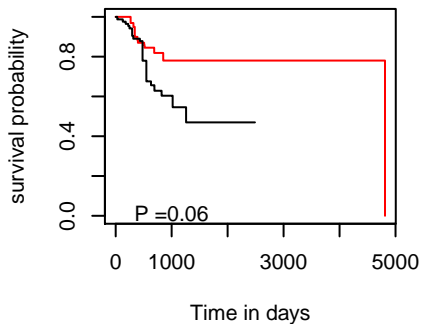

**DSS hsa-mir-101-2**

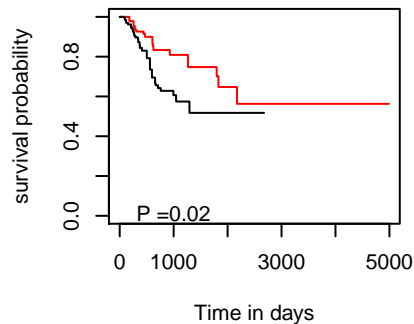

**OS hsa-mir-548v**

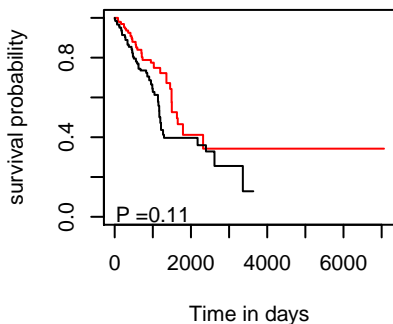

**PFI hsa-mir-548v**

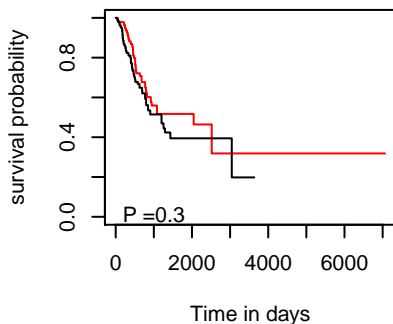

**DFI hsa-mir-548v**

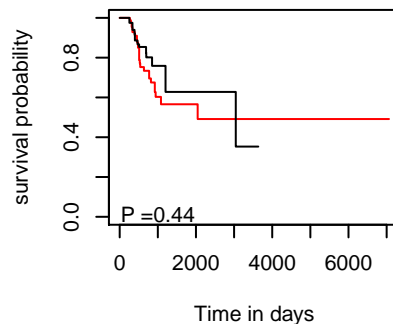

**DSS hsa-mir-548v**

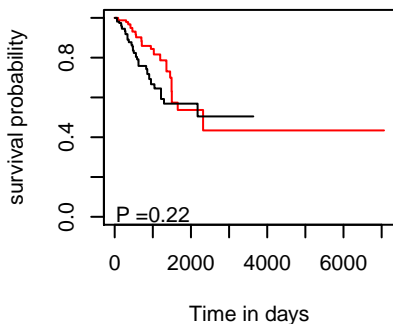

**OS hsa-mir-3619**

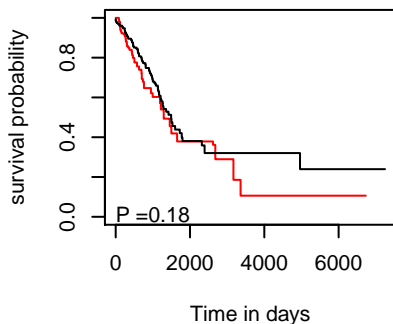

**PFI hsa-mir-3619**

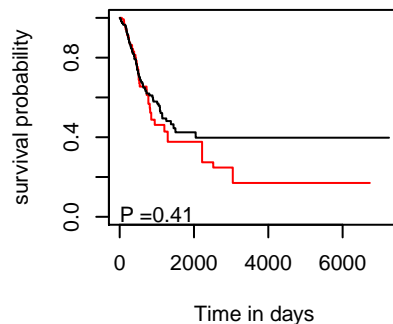

**DFI hsa-mir-3619**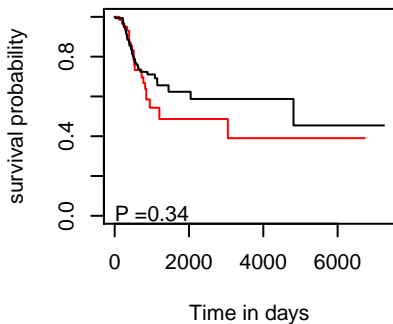**DSS hsa-mir-3619**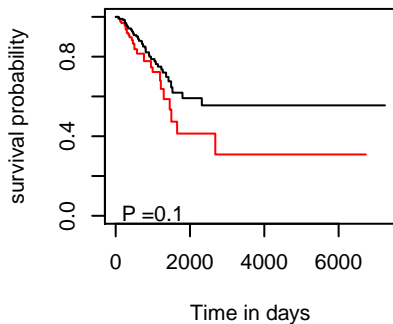**OS hsa-mir-4510**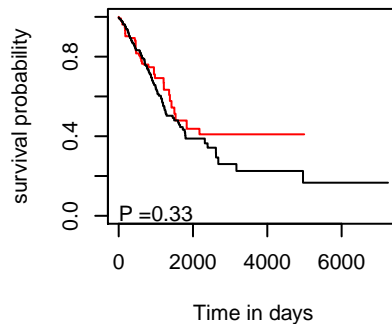**PFI hsa-mir-4510**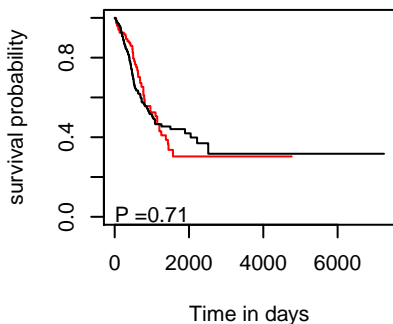**DFI hsa-mir-4510**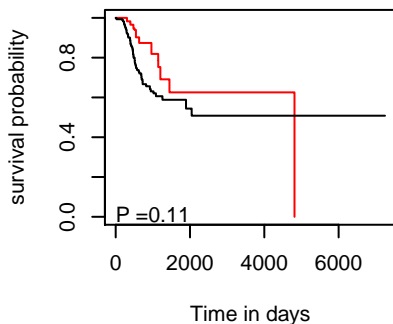**DSS hsa-mir-4510**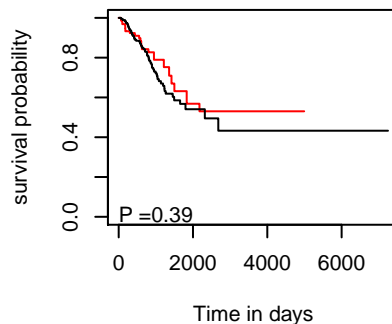**OS hsa-mir-4786**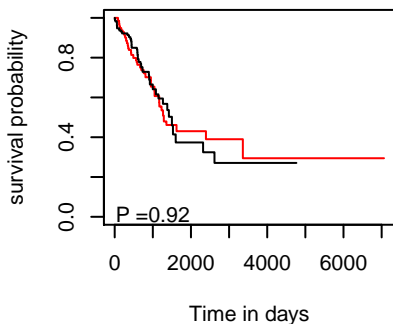**PFI hsa-mir-4786**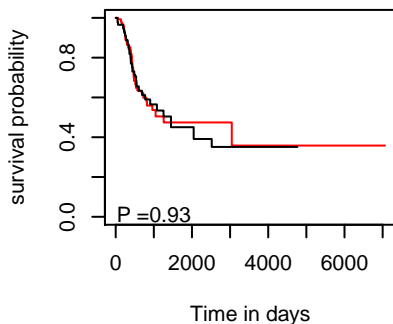**DFI hsa-mir-4786**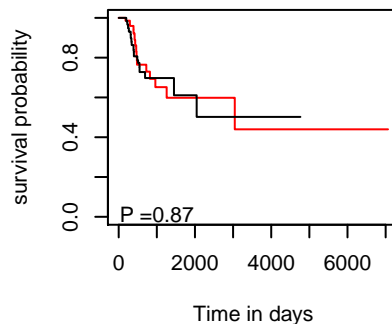

**DSS hsa-mir-4786**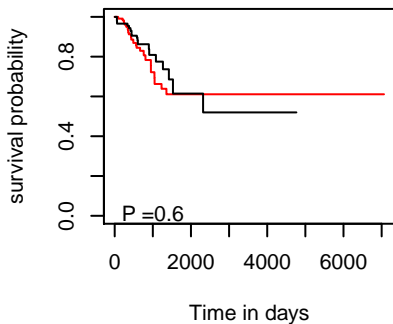**OS hsa-let-7e**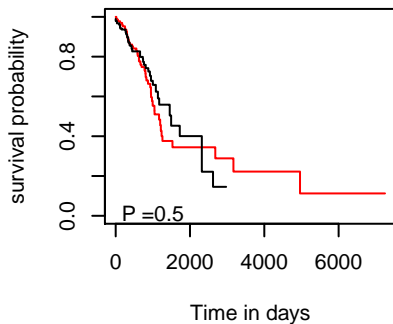**PFI hsa-let-7e**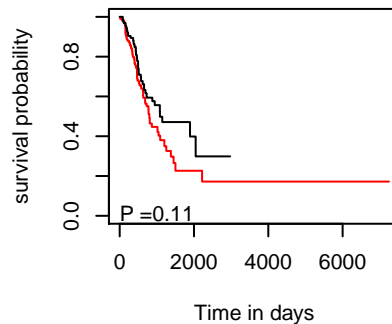**DFI hsa-let-7e**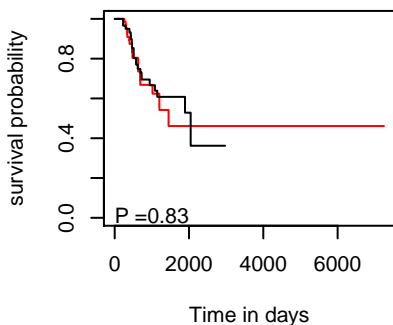**DSS hsa-let-7e**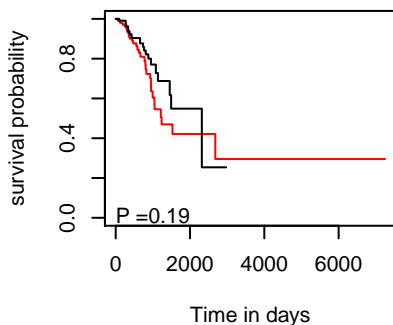**OS hsa-mir-3187**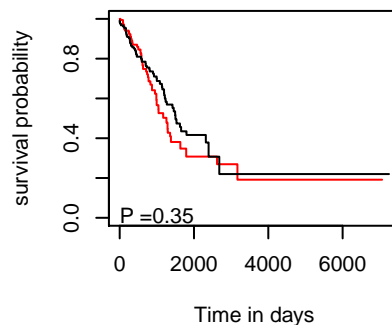**PFI hsa-mir-3187**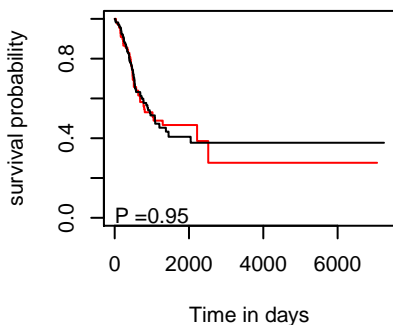**DFI hsa-mir-3187**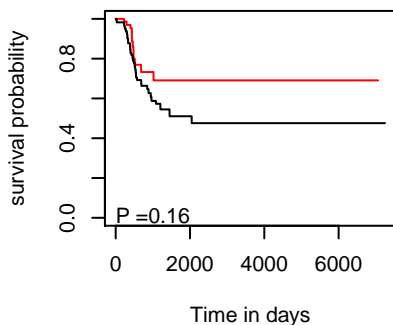**DSS hsa-mir-3187**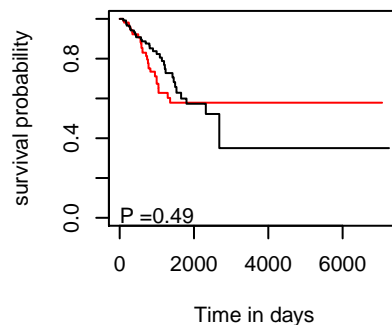

**OS hsa-mir-1249**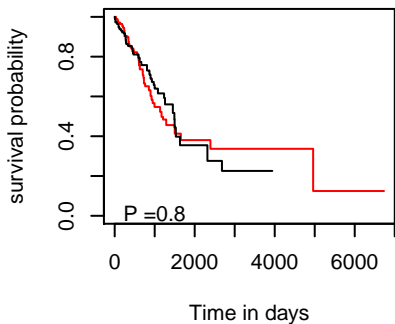**PFI hsa-mir-1249**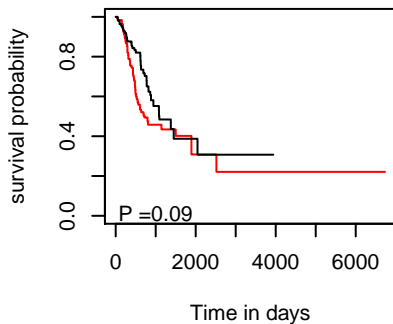**DFI hsa-mir-1249**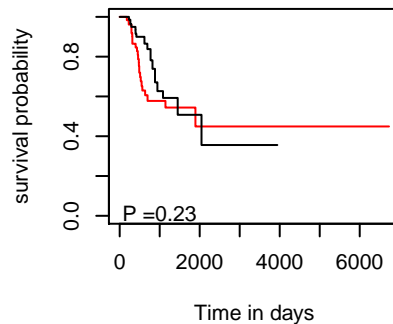**DSS hsa-mir-1249**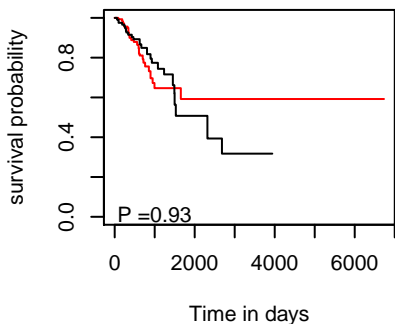**OS hsa-mir-486**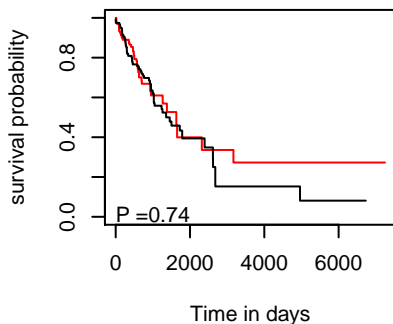**PFI hsa-mir-486**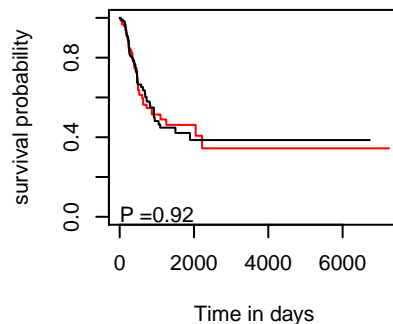**DFI hsa-mir-486**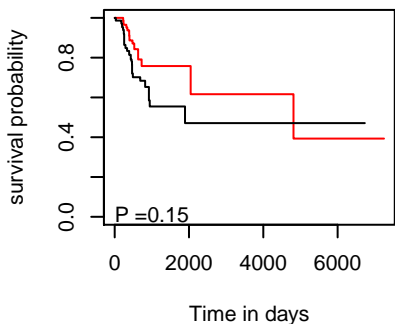**DSS hsa-mir-486**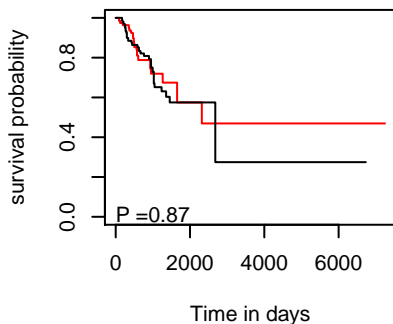**OS hsa-mir-326**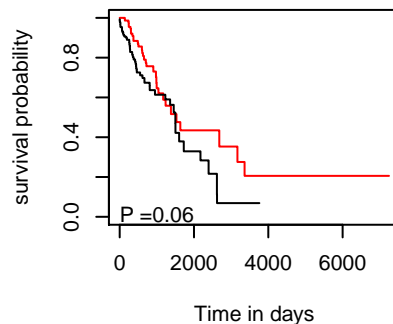

**PFI hsa-mir-326**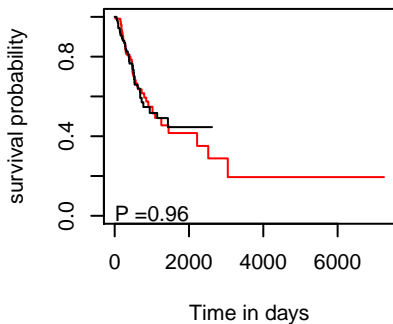**DFI hsa-mir-326**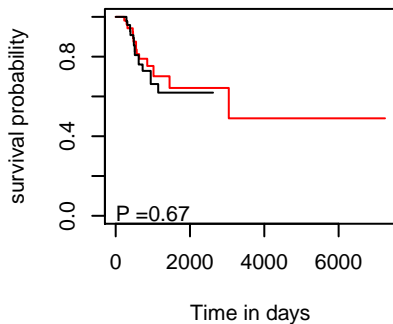**DSS hsa-mir-326**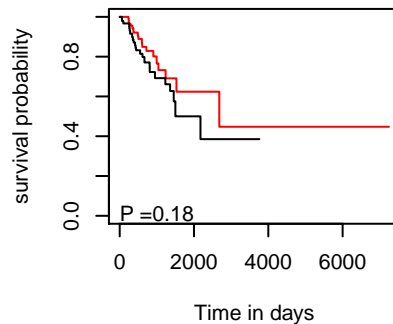**OS hsa-mir-5698**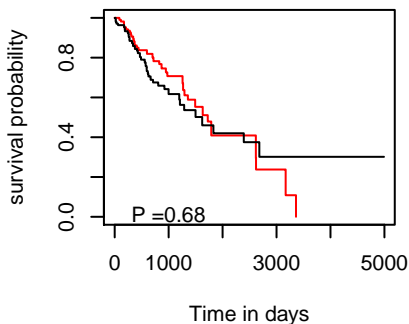**PFI hsa-mir-5698**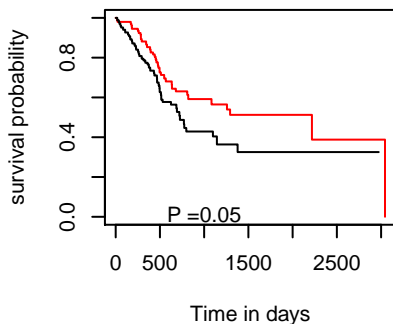**DFI hsa-mir-5698**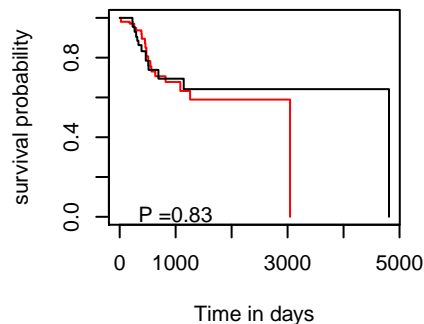**DSS hsa-mir-5698**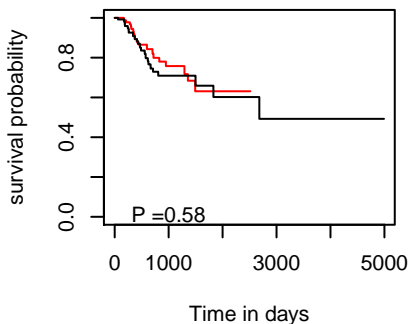**OS hsa-mir-582**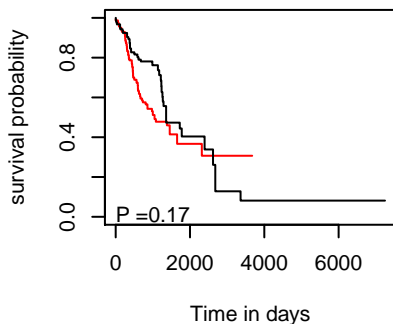**PFI hsa-mir-582**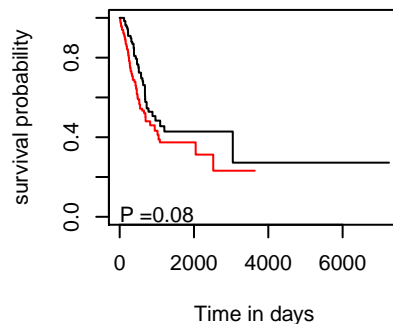

**DFI hsa-mir-582**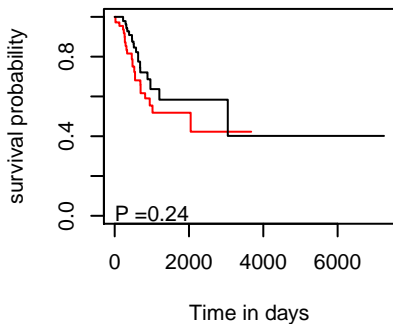**DSS hsa-mir-582**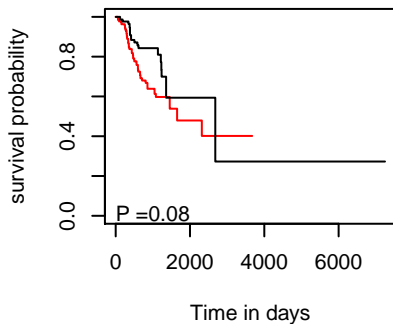**OS hsa-mir-4763**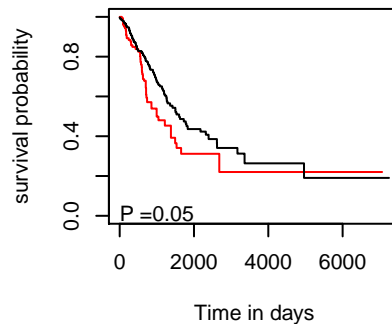**PFI hsa-mir-4763**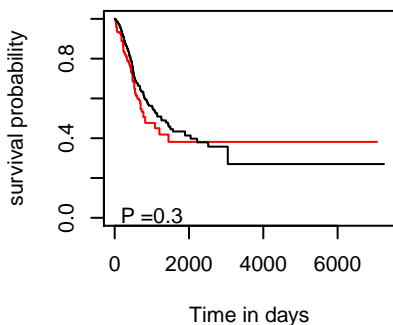**DFI hsa-mir-4763**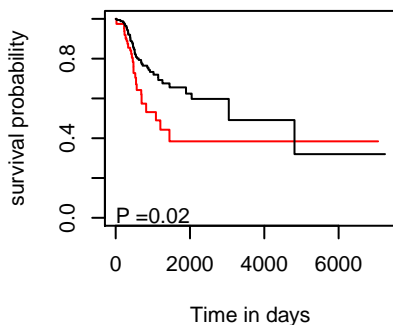**DSS hsa-mir-4763**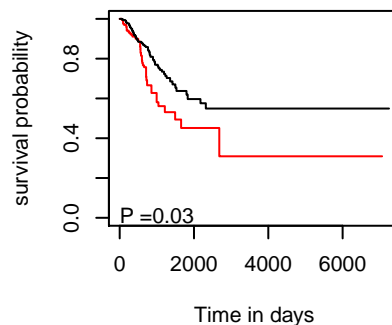**OS hsa-mir-4466**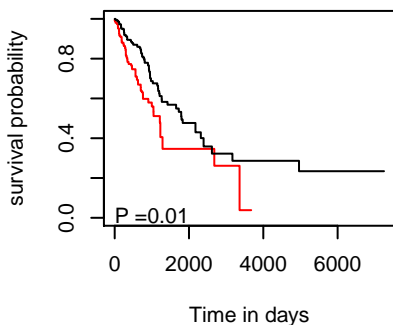**PFI hsa-mir-4466**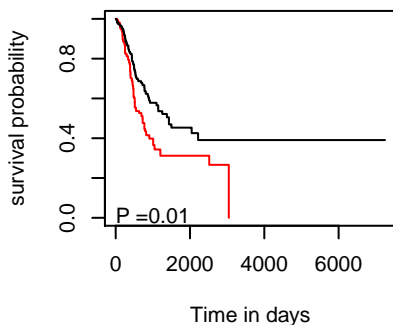**DFI hsa-mir-4466**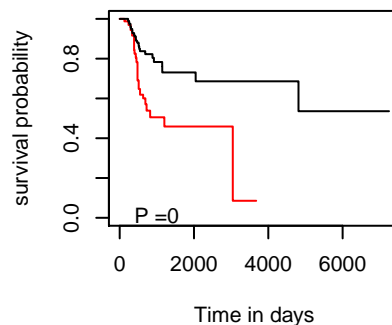

DSS hsa-mir-4466

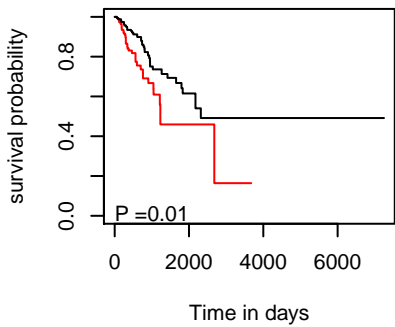

Supplement: MOESM21 [file 41598_2022_7628_MOESM21_ESM.pdf]
