# Supplementary material for: New Thinking on Read-Aloud.
Source: Springer Nature journal article supplement (doi:10.1038/s41598-022-07628-z), 2001-01-01

# Computing microRNA-gene interaction networks in pan-cancer using miRDriver

Banabithi Bose, Matthew Moravec, and Serdar Bozdog

# Supplemental Figure S13

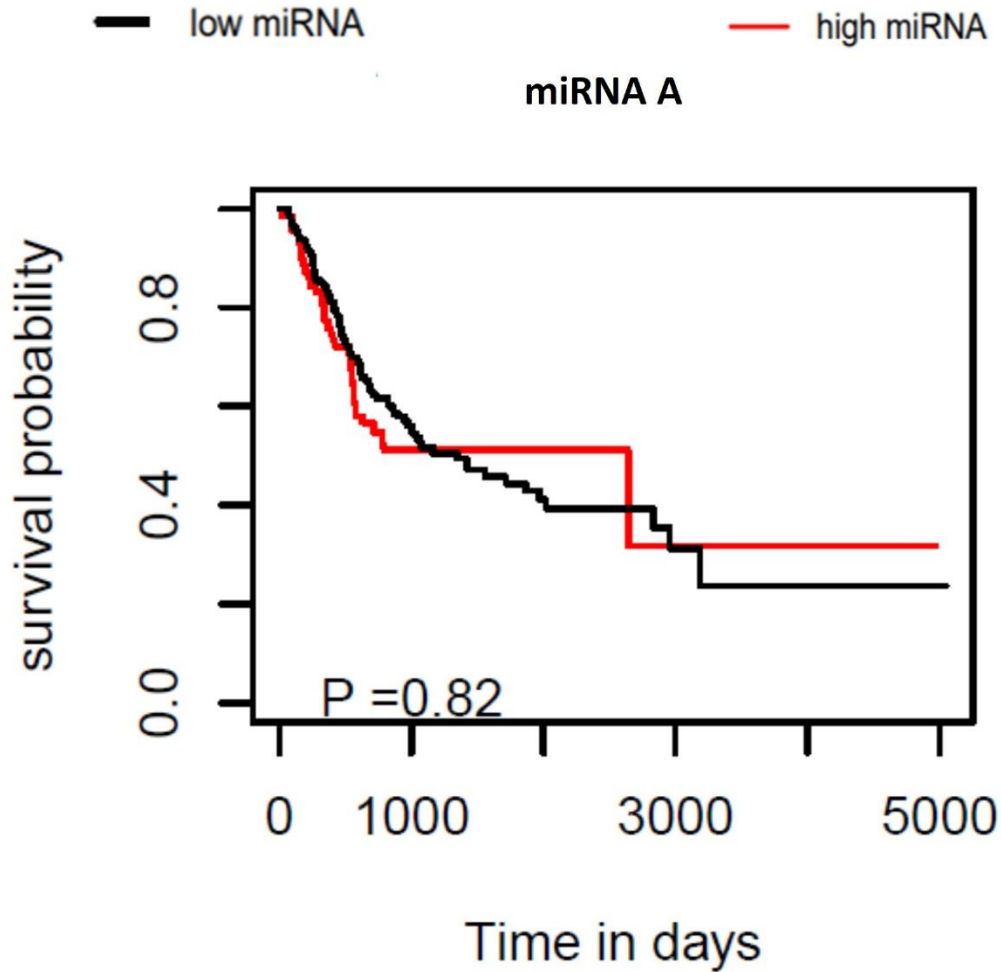

The *Adjusted Kaplan-Meier* survival plots for the computed miRNAs in high and low miRNA expression patient groups.

# Supplemental Figure S13

## Cancer Type: LUSC

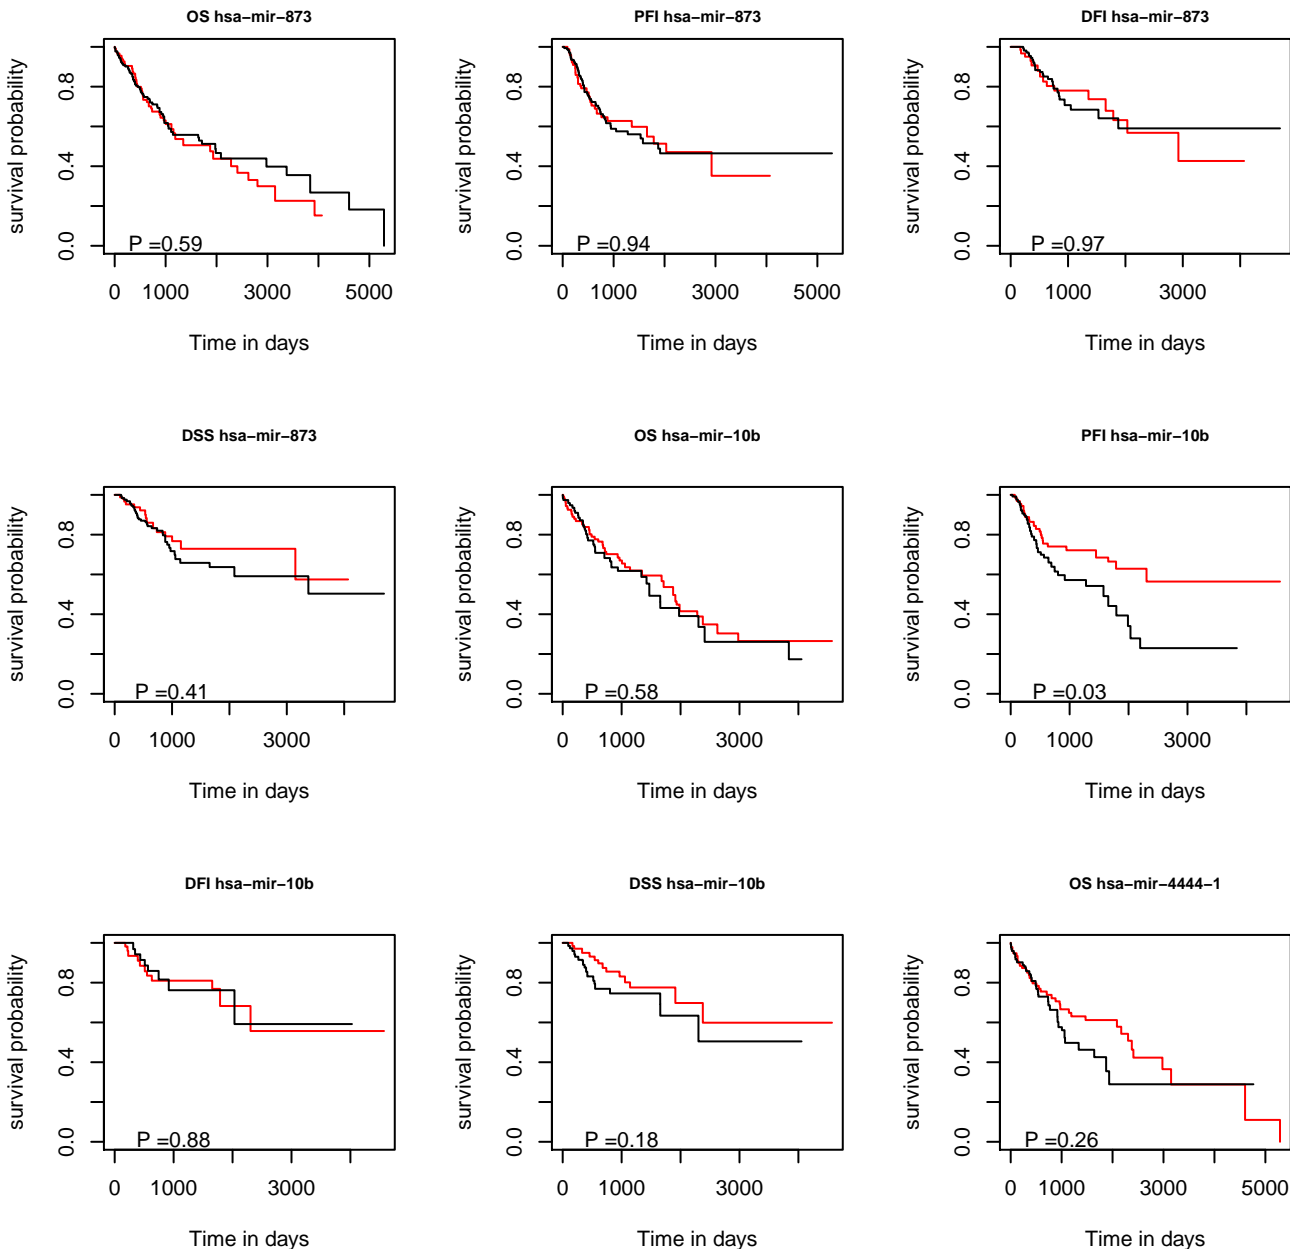

**PFI hsa-mir-4444-1**

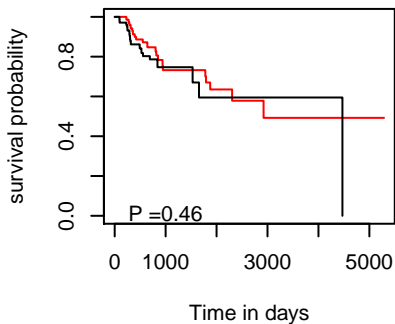

**DFI hsa-mir-4444-1**

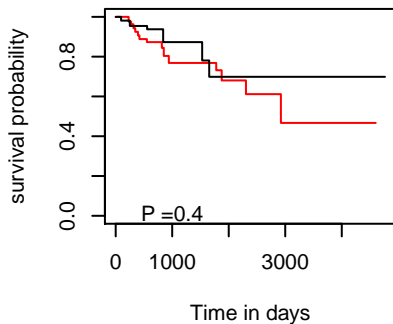

**DSS hsa-mir-4444-1**

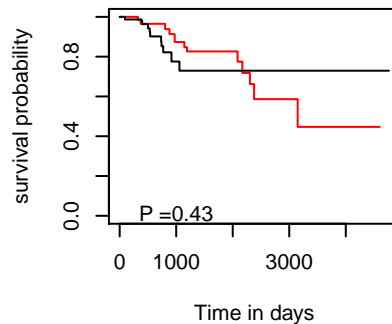

**OS hsa-mir-6512**

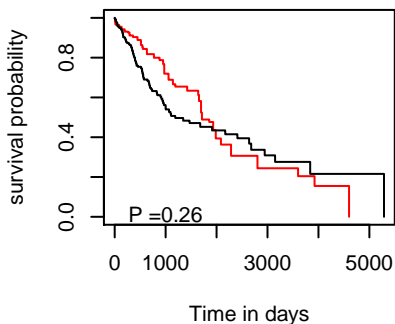

**PFI hsa-mir-6512**

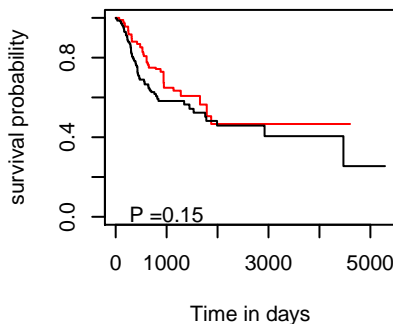

**DFI hsa-mir-6512**

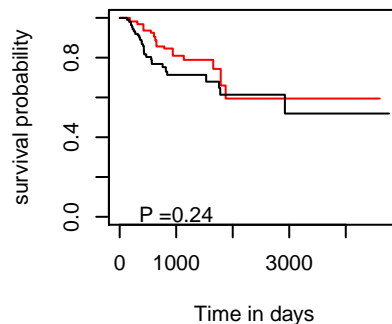

**DSS hsa-mir-6512**

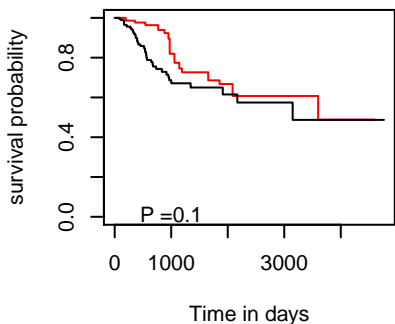

**OS hsa-mir-7704**

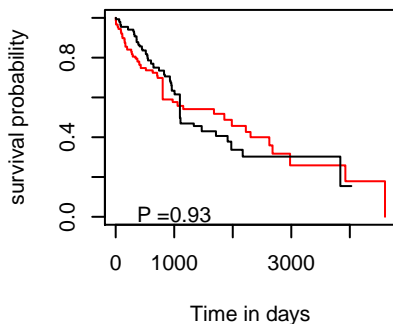

**PFI hsa-mir-7704**

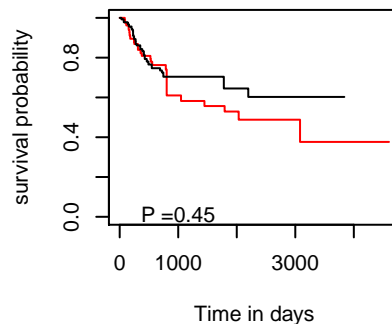

**DFI hsa-mir-7704**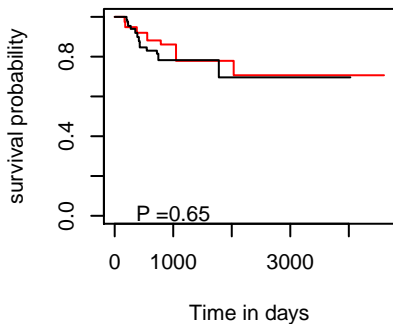**DSS hsa-mir-7704**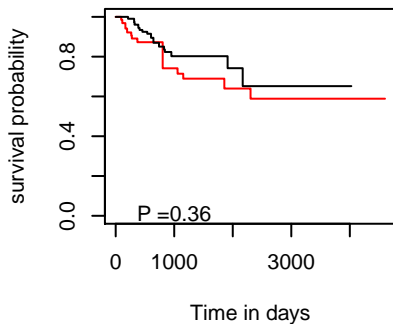**OS hsa-mir-5683**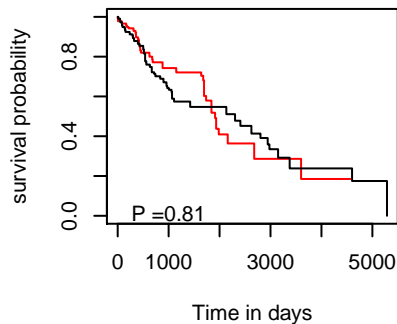**PFI hsa-mir-5683**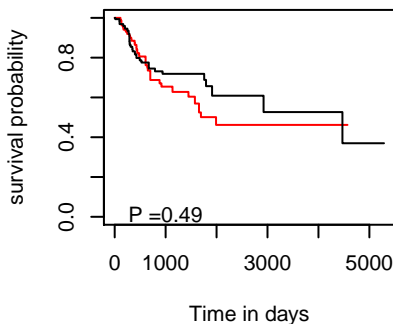**DFI hsa-mir-5683**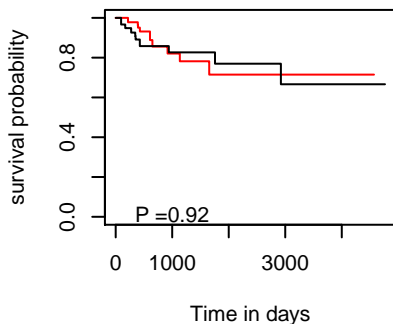**DSS hsa-mir-5683**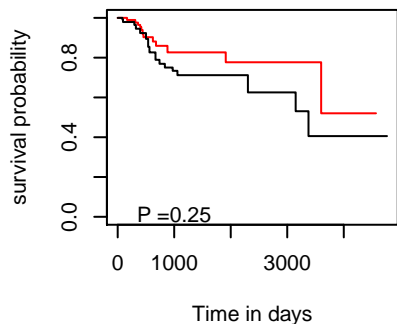**OS hsa-mir-4636**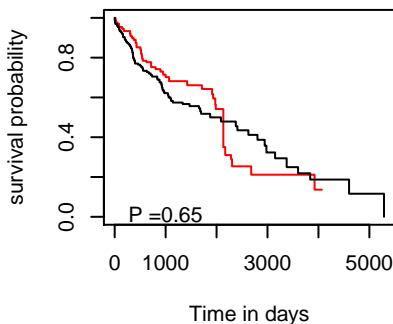**PFI hsa-mir-4636**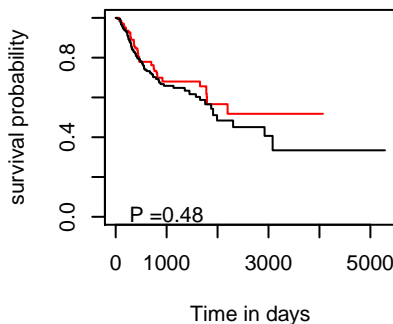**DFI hsa-mir-4636**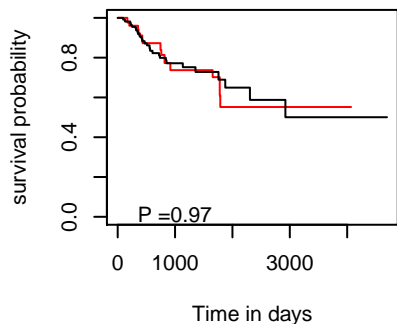

**DSS hsa-mir-4636**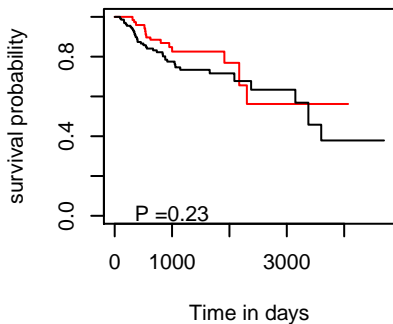**OS hsa-mir-4645**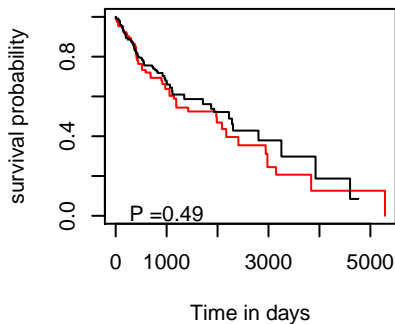**PFI hsa-mir-4645**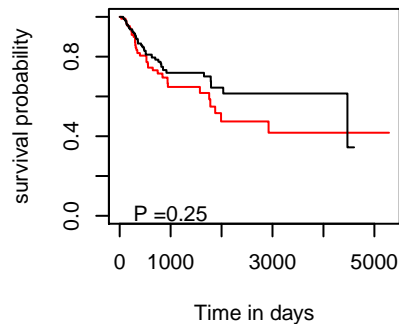**DFI hsa-mir-4645**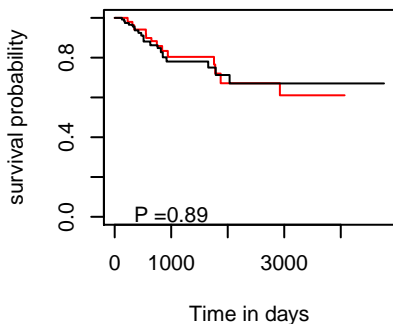**DSS hsa-mir-4645**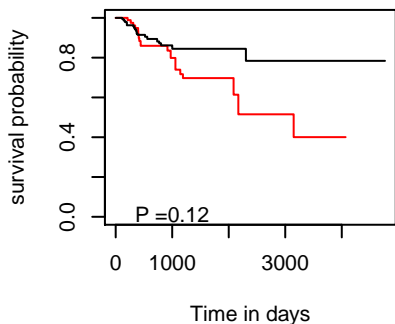**OS hsa-mir-4449**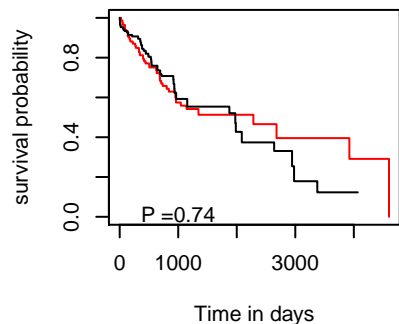**PFI hsa-mir-4449**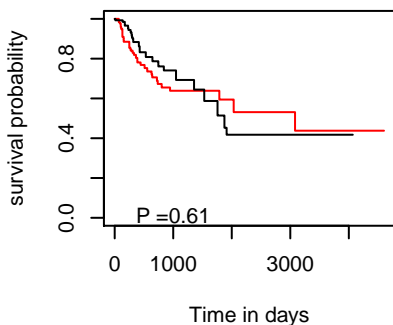**DFI hsa-mir-4449**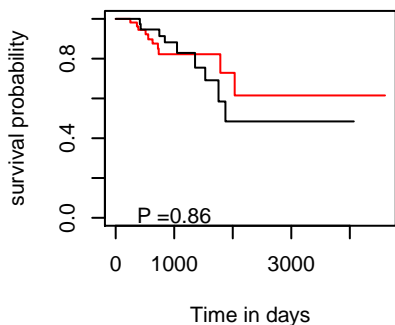**DSS hsa-mir-4449**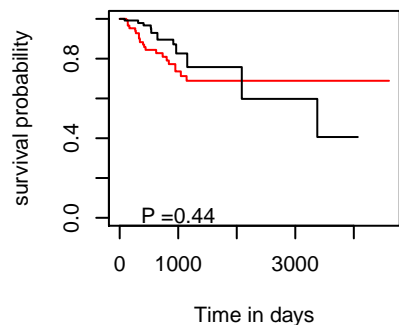

**OS hsa-mir-1249**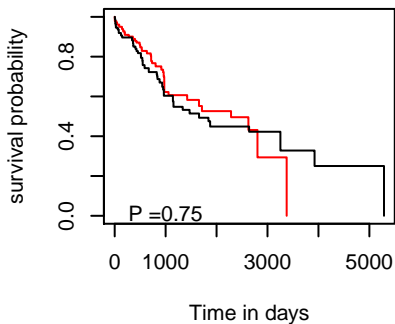**PFI hsa-mir-1249**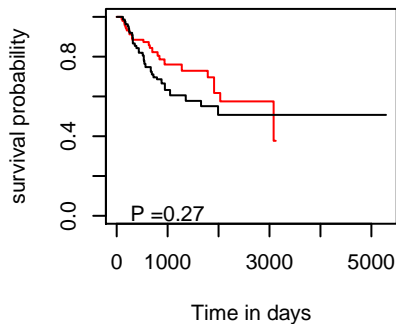**DFI hsa-mir-1249**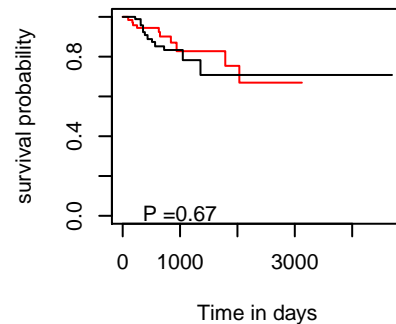**DSS hsa-mir-1249**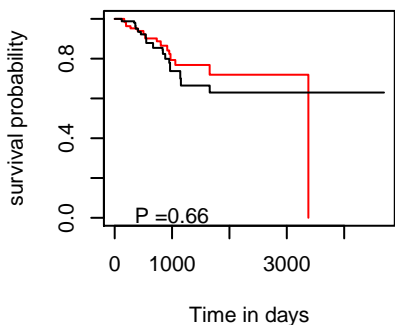**OS hsa-mir-153-2**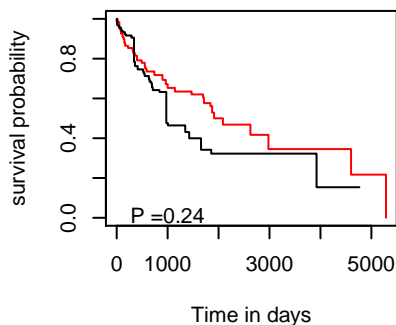**PFI hsa-mir-153-2**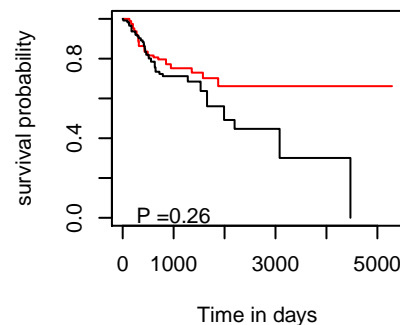**DFI hsa-mir-153-2**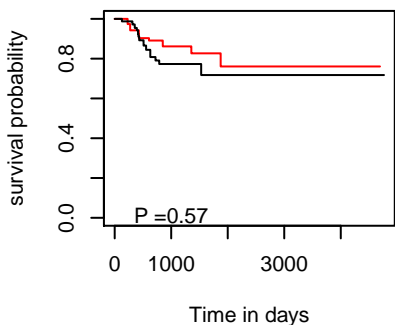**DSS hsa-mir-153-2**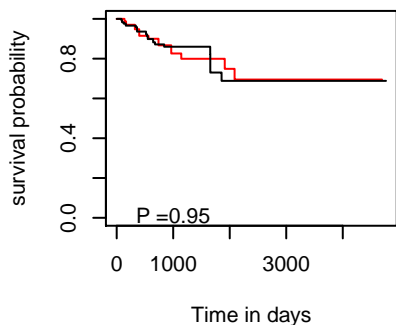**OS hsa-mir-3619**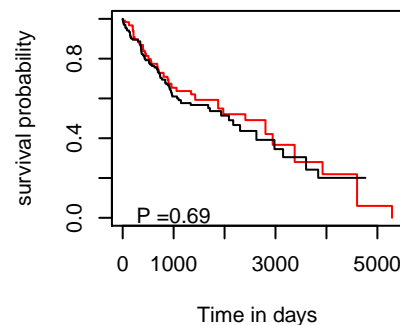

**PFI hsa-mir-3619**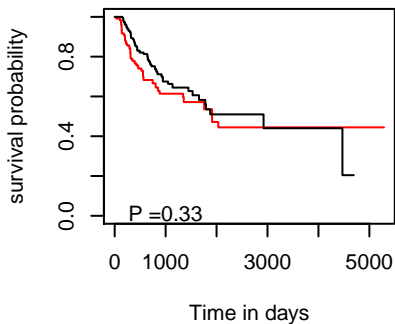**DFI hsa-mir-3619**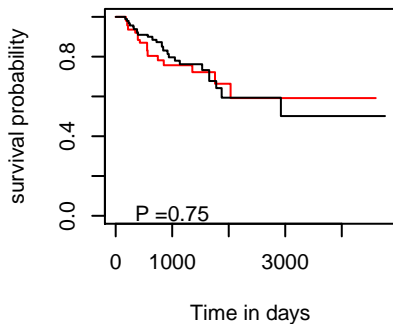**DSS hsa-mir-3619**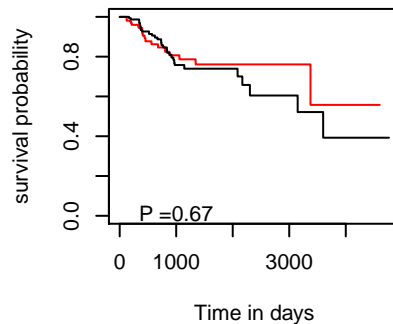**OS hsa-mir-5571**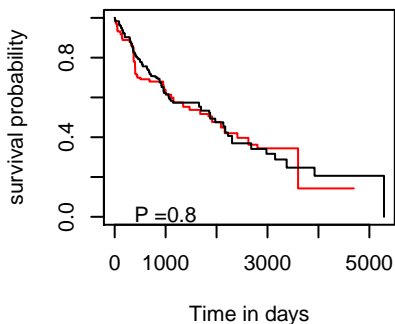**PFI hsa-mir-5571**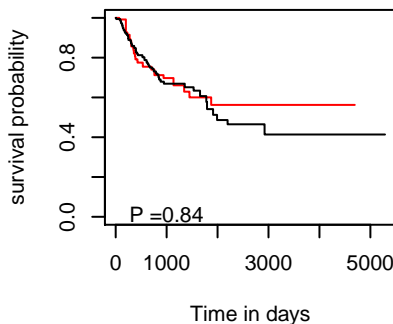**DFI hsa-mir-5571**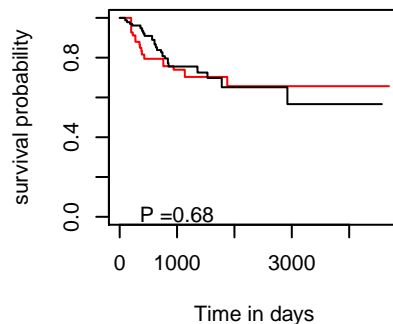**DSS hsa-mir-5571**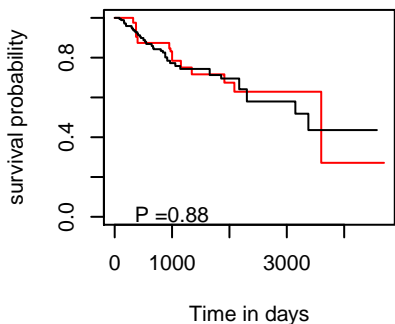**OS hsa-mir-301b**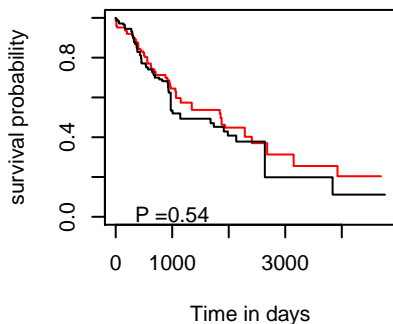**PFI hsa-mir-301b**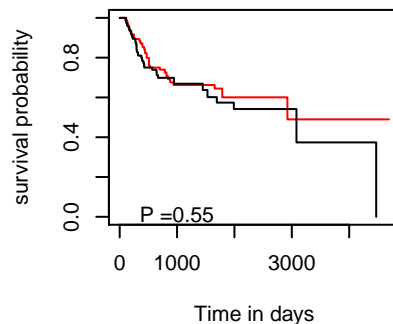

**DFI hsa-mir-301b**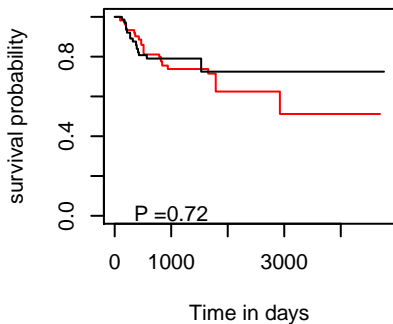**DSS hsa-mir-301b**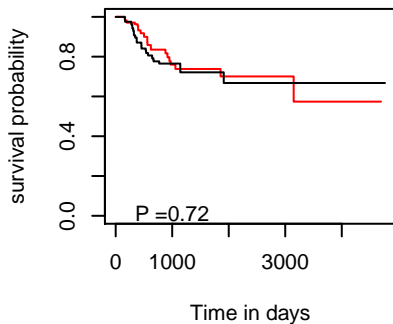**OS hsa-mir-3934**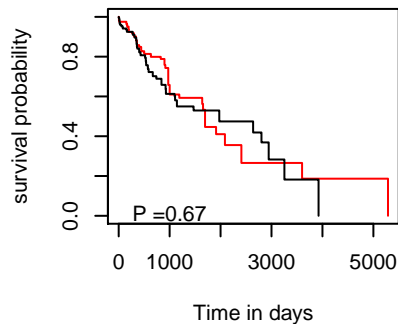**PFI hsa-mir-3934**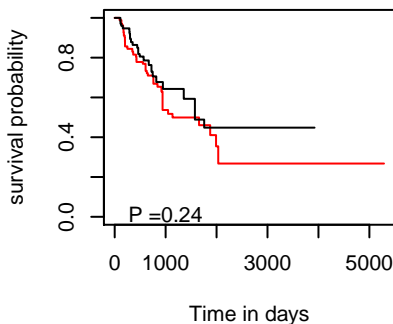**DFI hsa-mir-3934**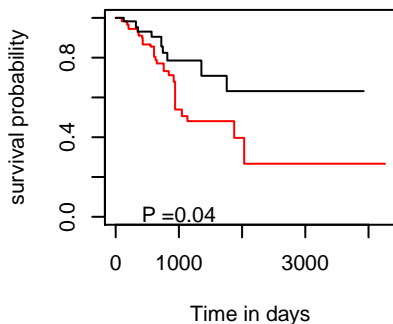**DSS hsa-mir-3934**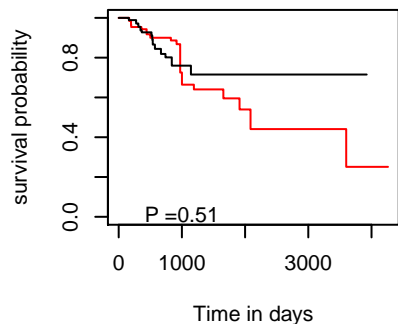**OS hsa-mir-7-2**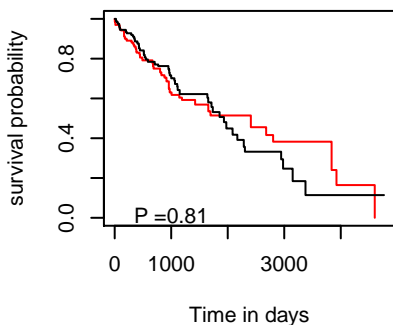**PFI hsa-mir-7-2**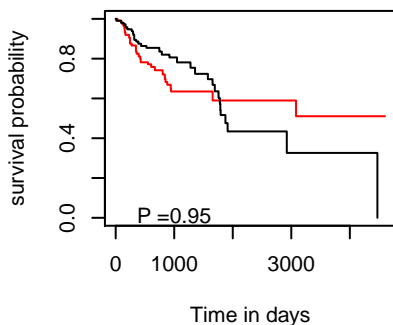**DFI hsa-mir-7-2**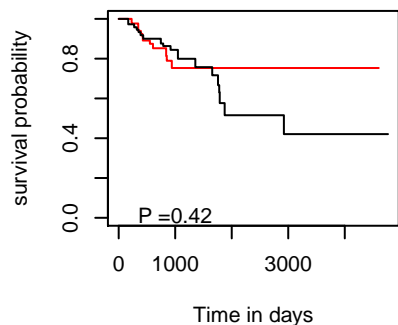

**DSS hsa-mir-7-2**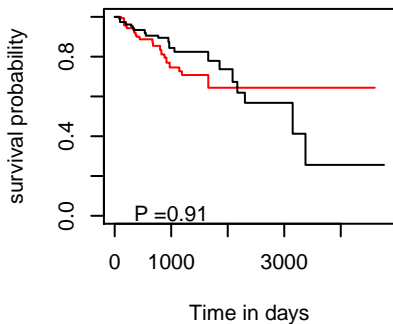**OS hsa-mir-598**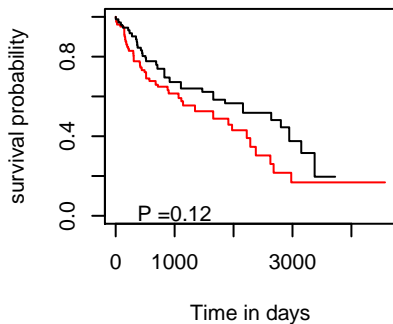**PFI hsa-mir-598**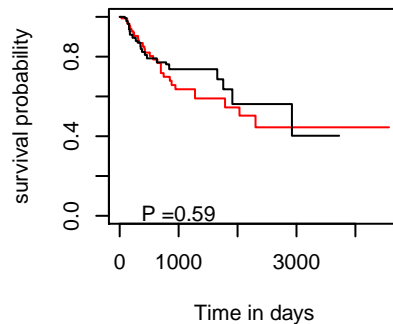**DFI hsa-mir-598**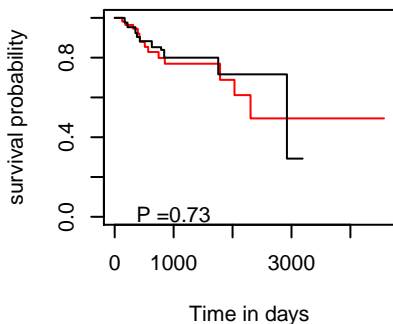**DSS hsa-mir-598**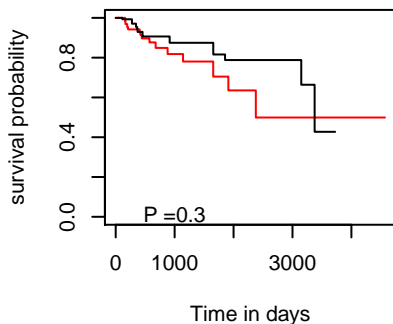**OS hsa-mir-1284**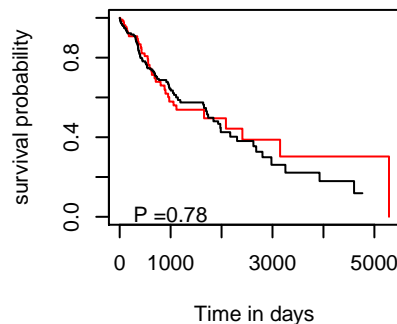**PFI hsa-mir-1284**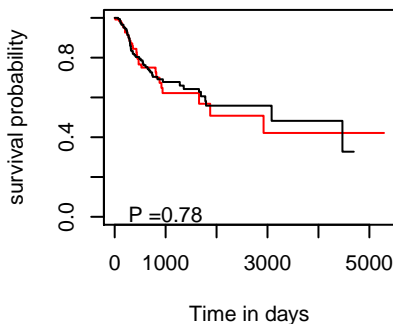**DFI hsa-mir-1284**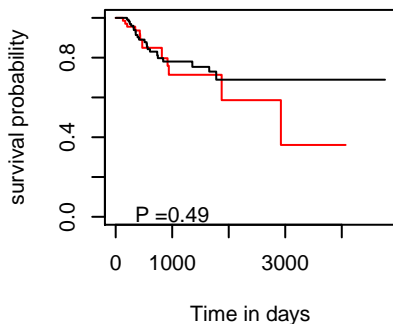**DSS hsa-mir-1284**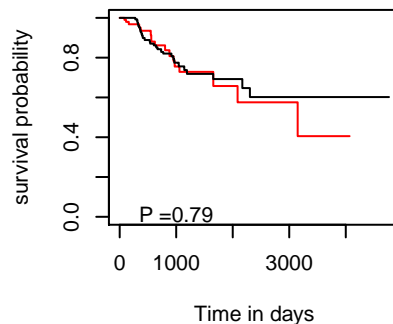

**OS hsa-mir-486**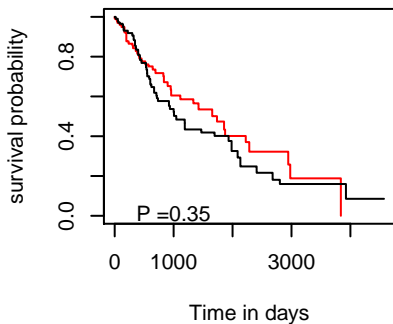**PFI hsa-mir-486**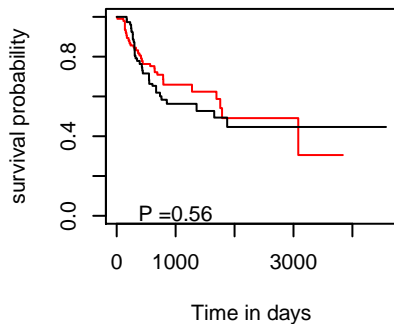**DFI hsa-mir-486**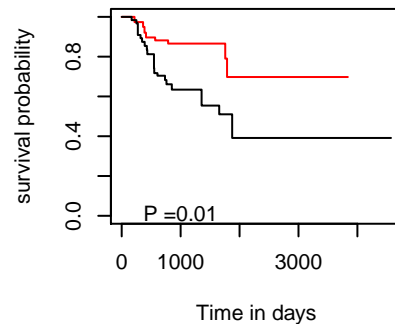**DSS hsa-mir-486**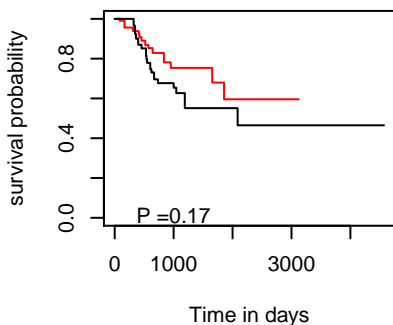**OS hsa-mir-1275**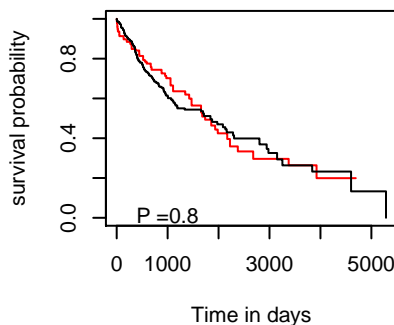**PFI hsa-mir-1275**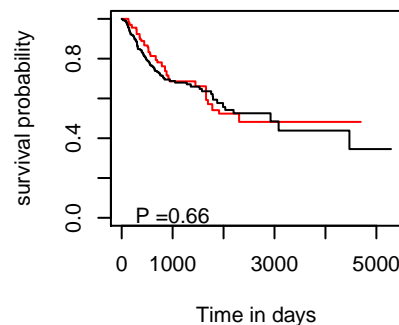**DFI hsa-mir-1275**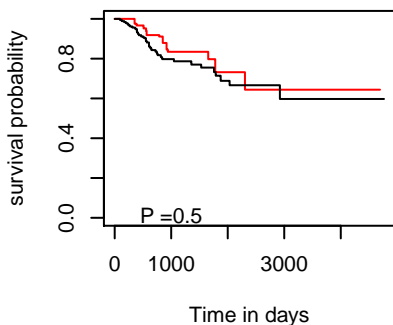**DSS hsa-mir-1275**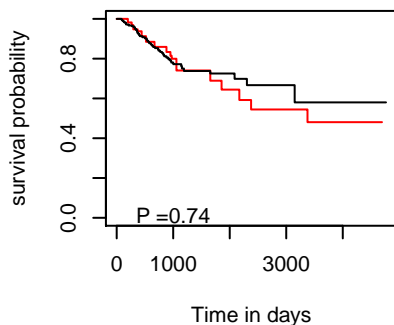**OS hsa-mir-3691**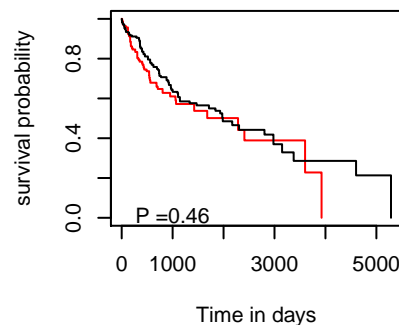

**PFI hsa-mir-3691**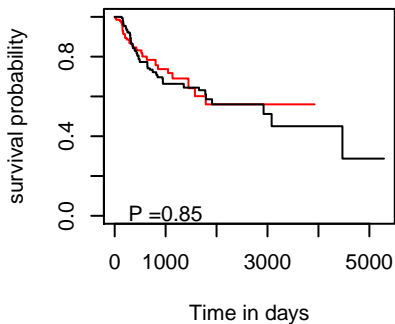**DFI hsa-mir-3691**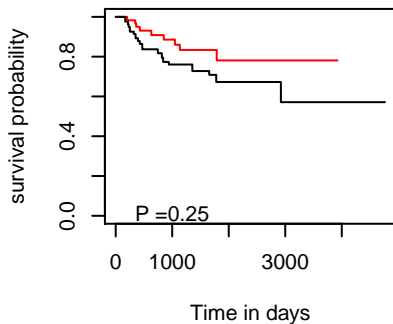**DSS hsa-mir-3691**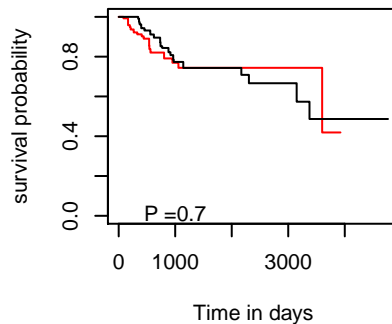**OS hsa-mir-887**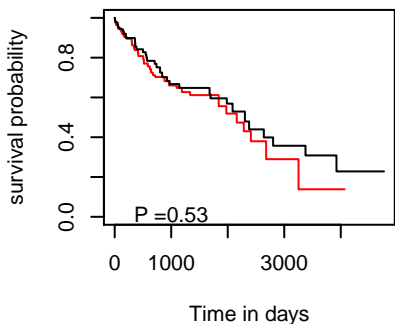**PFI hsa-mir-887**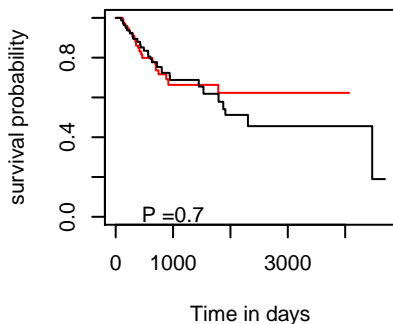**DFI hsa-mir-887**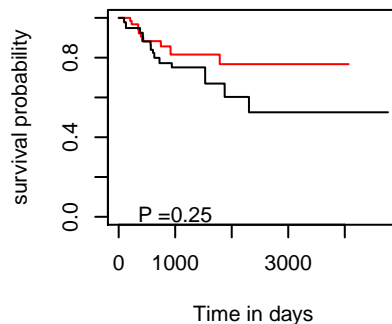**DSS hsa-mir-887**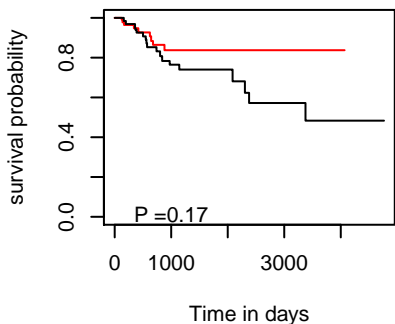**OS hsa-let-7a-3**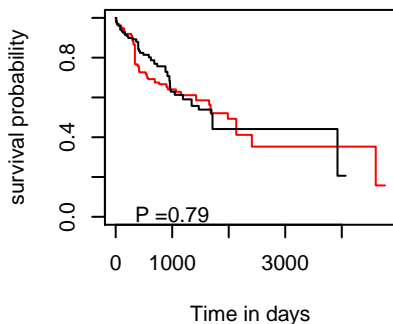**PFI hsa-let-7a-3**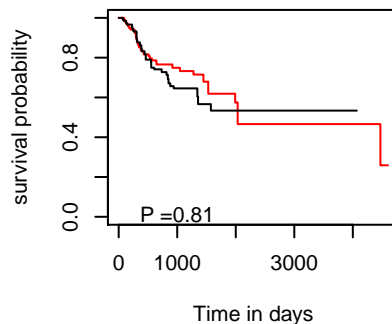

**DFI hsa-let-7a-3**

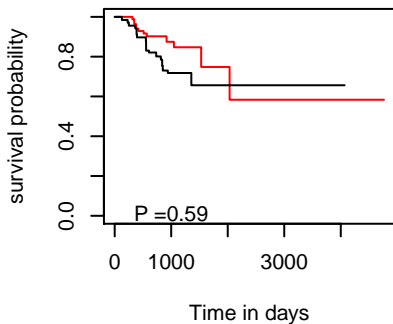

**DSS hsa-let-7a-3**

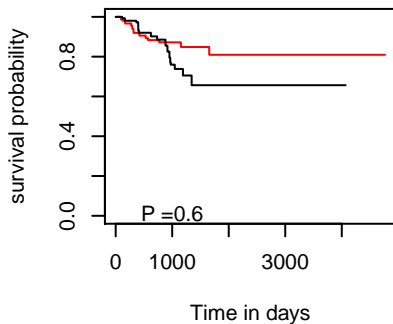

**OS hsa-mir-4762**

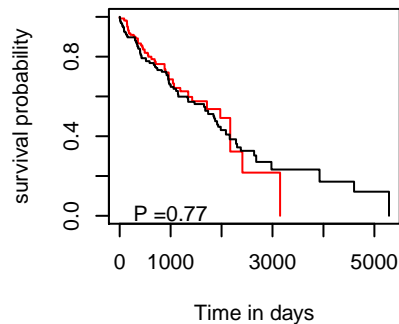

**PFI hsa-mir-4762**

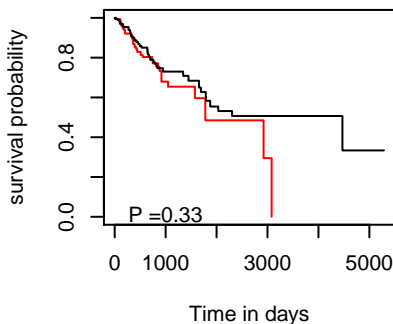

**DFI hsa-mir-4762**

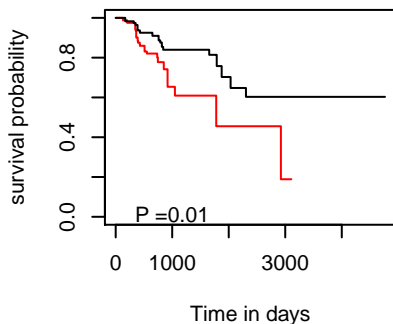

**DSS hsa-mir-4762**

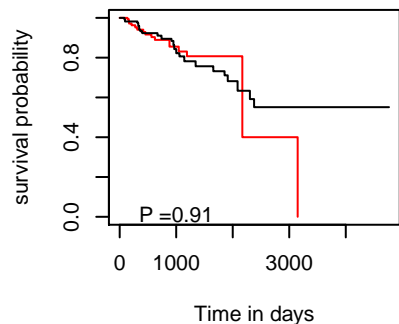

**OS hsa-mir-876**

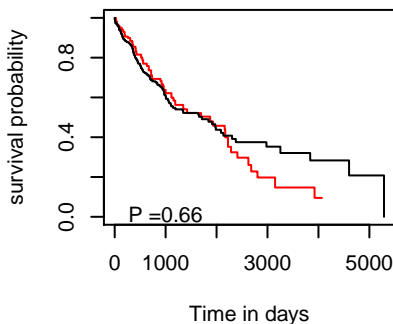

**PFI hsa-mir-876**

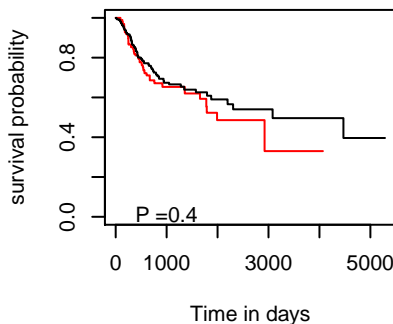

**DFI hsa-mir-876**

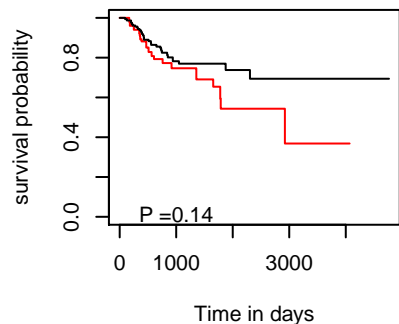

**DSS hsa-mir-876**

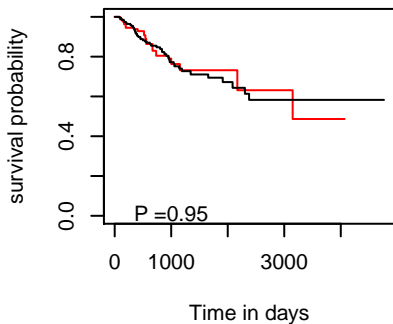

**OS hsa-mir-499a**

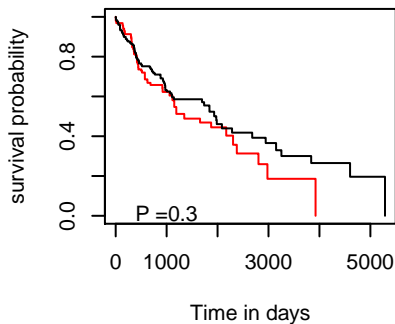

**PFI hsa-mir-499a**

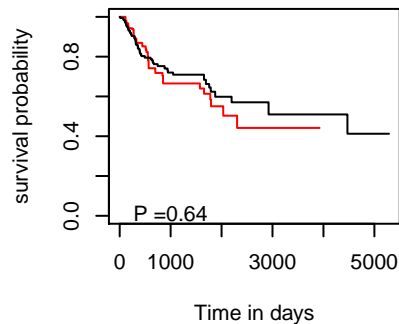

**DFI hsa-mir-499a**

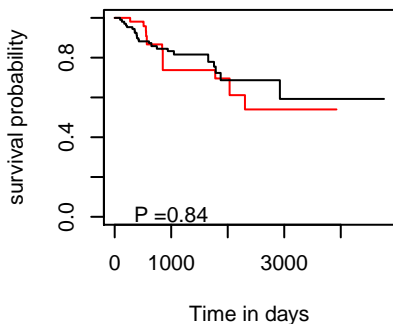

**DSS hsa-mir-499a**

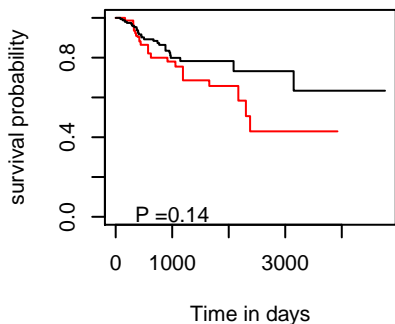

**OS hsa-mir-3136**

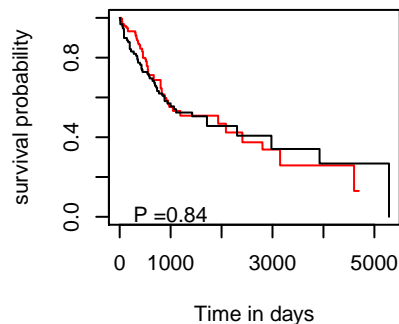

**PFI hsa-mir-3136**

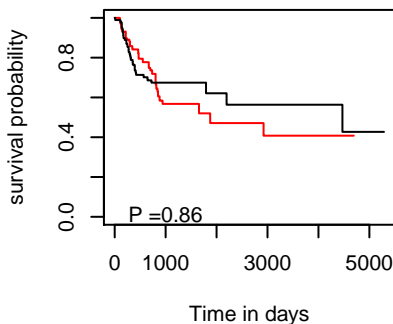

**DFI hsa-mir-3136**

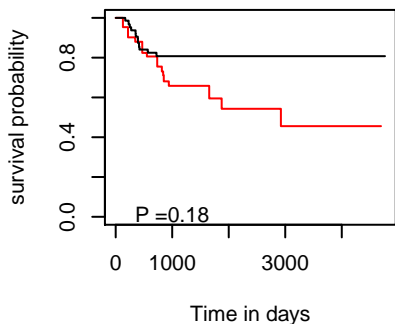

**DSS hsa-mir-3136**

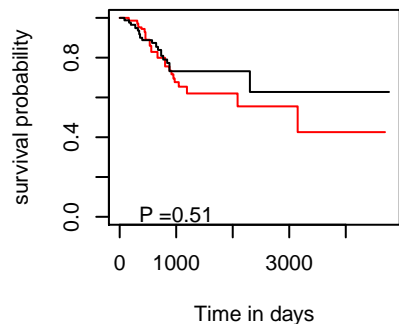

**OS hsa-mir-3607**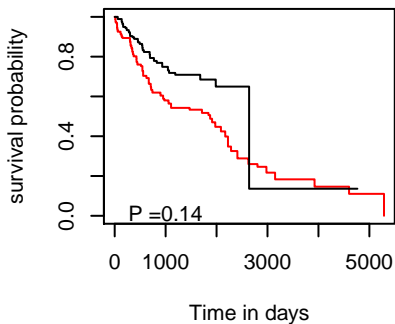**PFI hsa-mir-3607**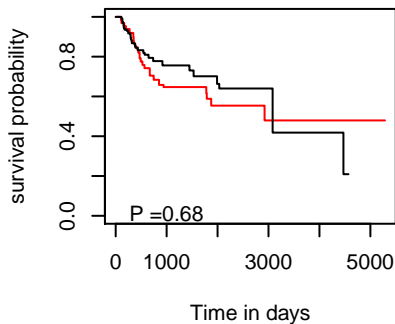**DFI hsa-mir-3607**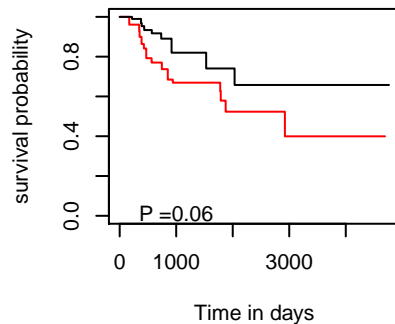**DSS hsa-mir-3607**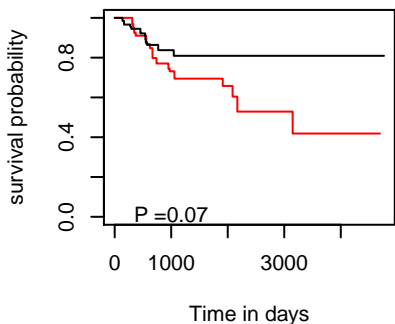**OS hsa-mir-4469**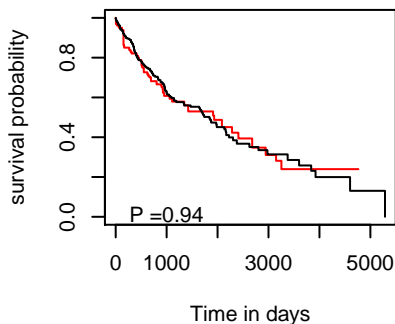**PFI hsa-mir-4469**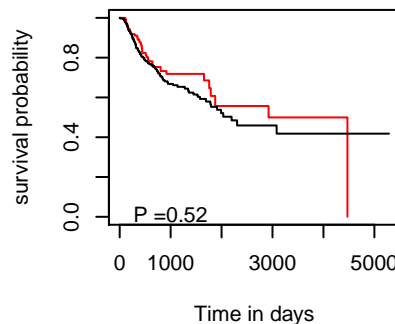**DFI hsa-mir-4469**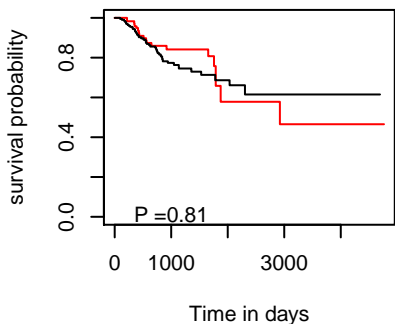**DSS hsa-mir-4469**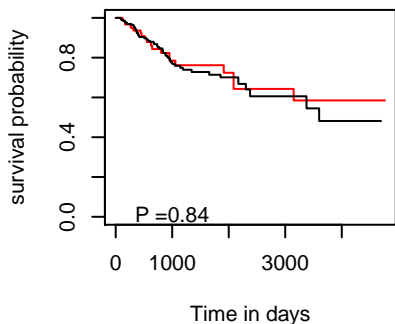**OS hsa-mir-6720**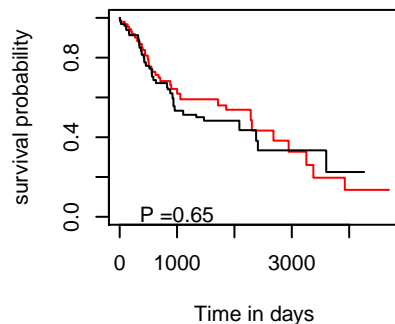



**DFI hsa-mir-216a**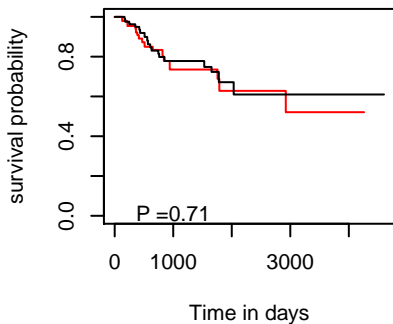**DSS hsa-mir-216a**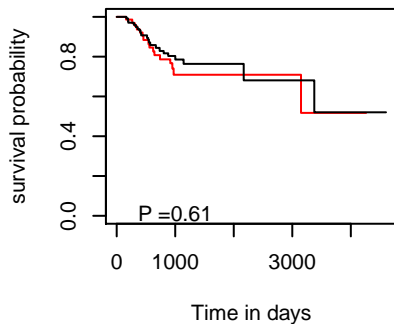**OS hsa-mir-3618**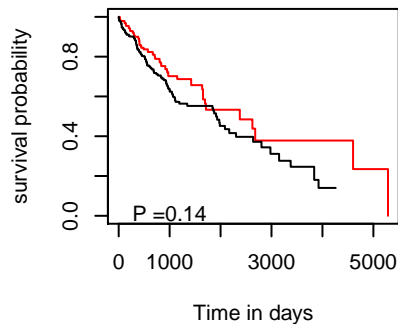**PFI hsa-mir-3618**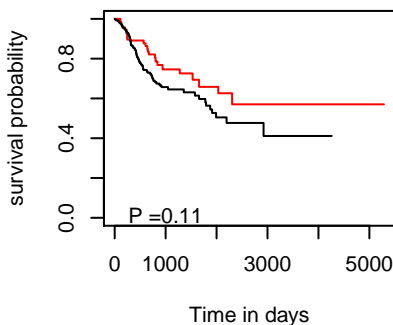**DFI hsa-mir-3618**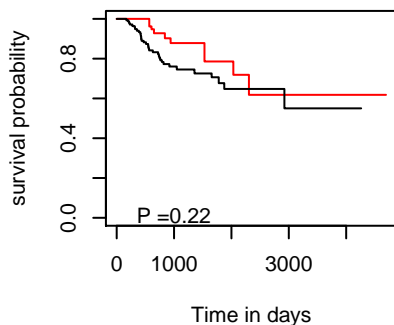**DSS hsa-mir-3618**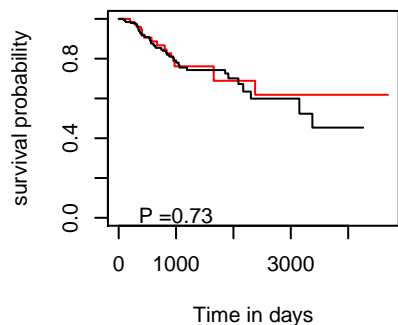**OS hsa-mir-3682**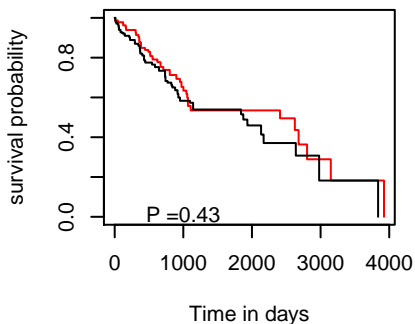**PFI hsa-mir-3682**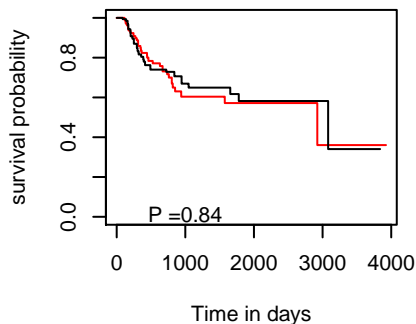**DFI hsa-mir-3682**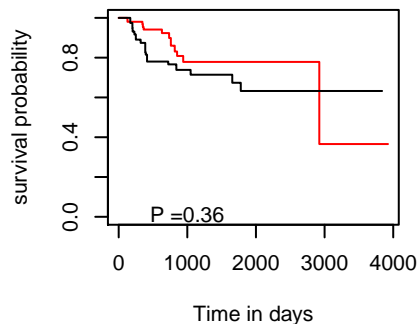

**DSS hsa-mir-3682**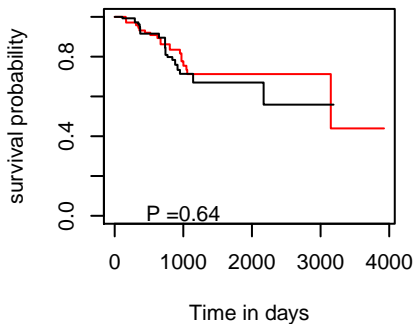**OS hsa-mir-559**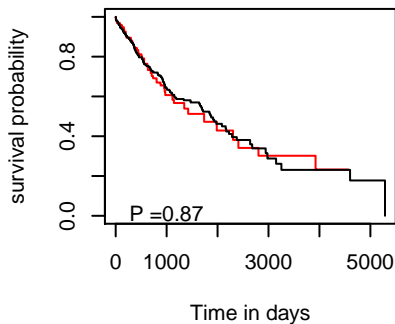**PFI hsa-mir-559**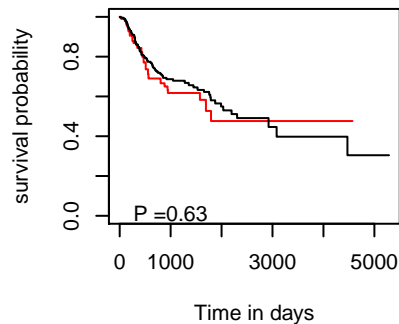**DFI hsa-mir-559**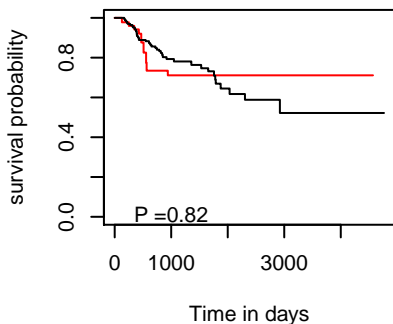**DSS hsa-mir-559**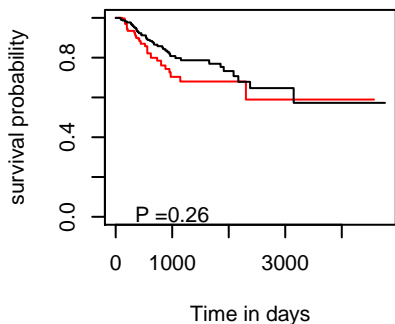**OS hsa-mir-197**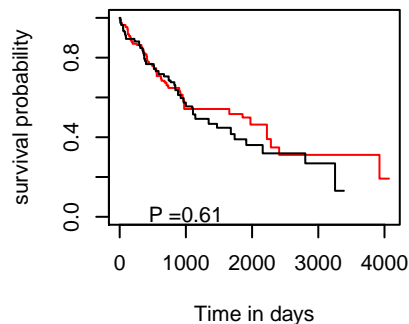**PFI hsa-mir-197**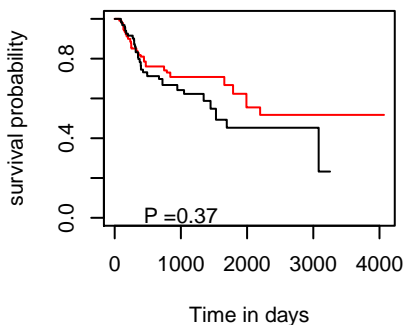**DFI hsa-mir-197**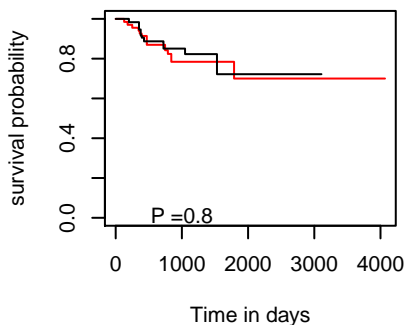**DSS hsa-mir-197**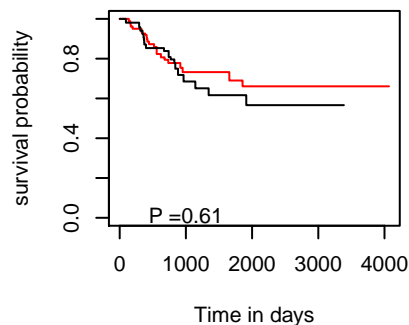

**OS hsa-mir-216b**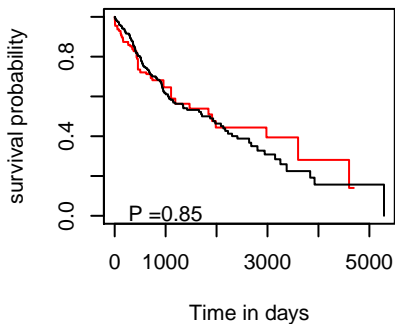**PFI hsa-mir-216b**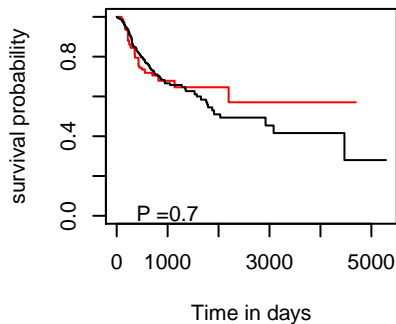**DFI hsa-mir-216b**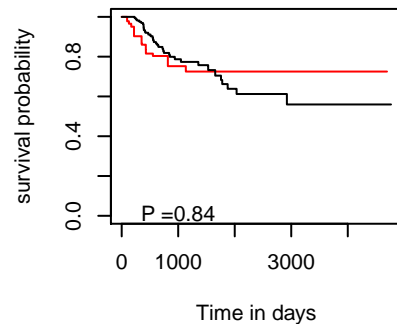**DSS hsa-mir-216b**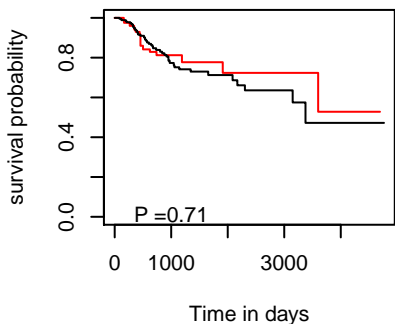**OS hsa-mir-217**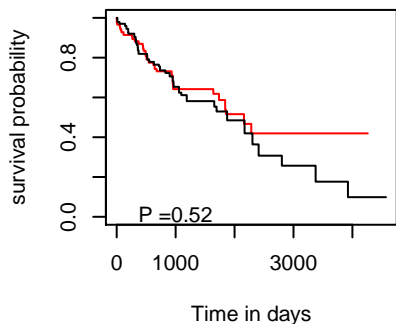**PFI hsa-mir-217**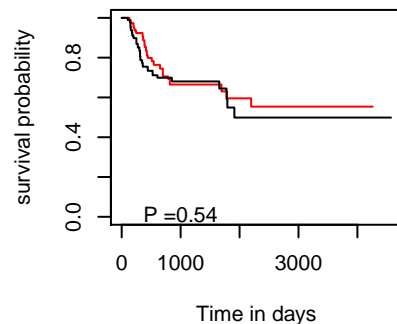**DFI hsa-mir-217**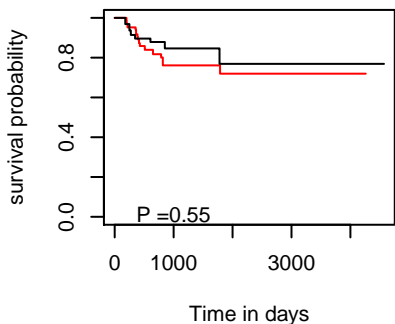**DSS hsa-mir-217**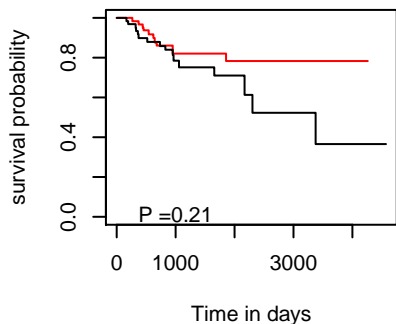**OS hsa-mir-4707**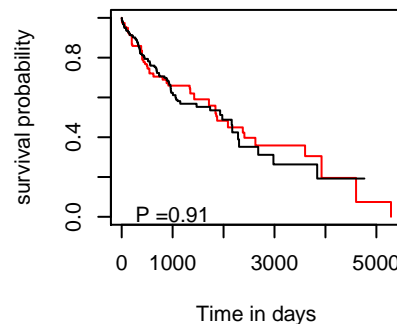

**PFI hsa-mir-4707**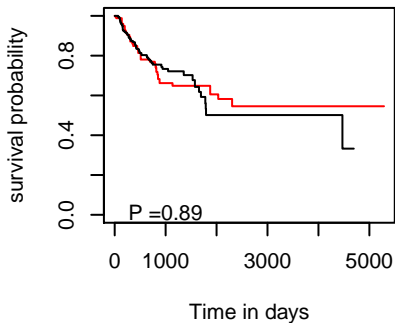**DFI hsa-mir-4707**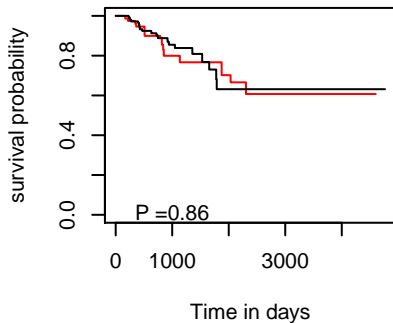**DSS hsa-mir-4707**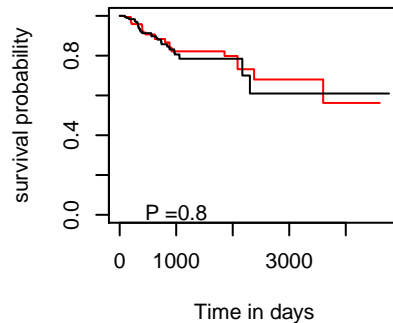**OS hsa-mir-3926-2**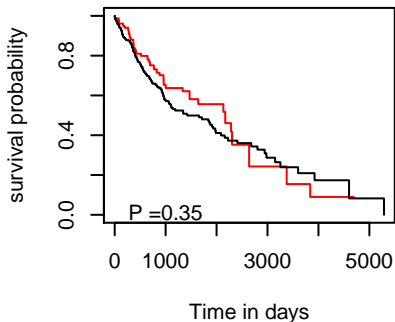**PFI hsa-mir-3926-2**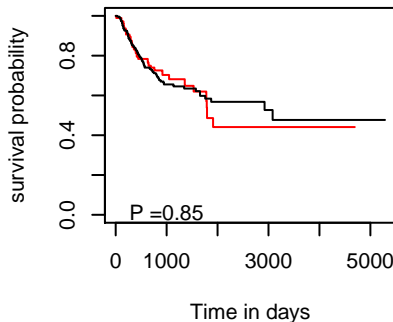**DFI hsa-mir-3926-2**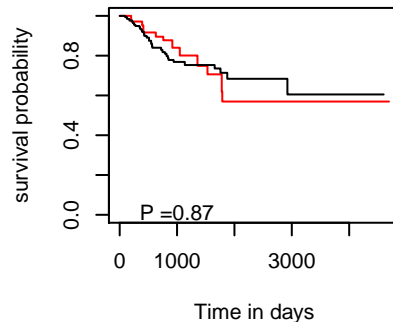**DSS hsa-mir-3926-2**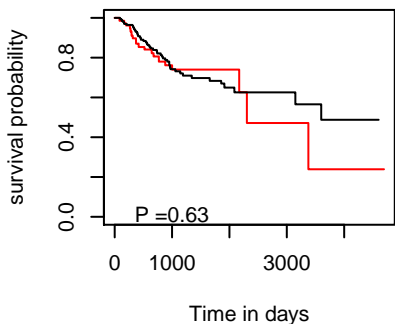**OS hsa-mir-6510**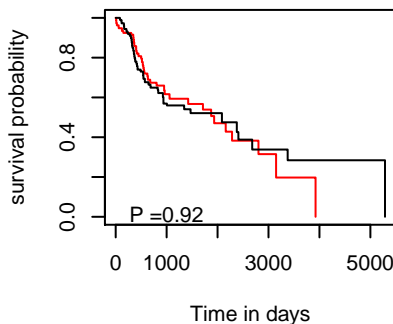**PFI hsa-mir-6510**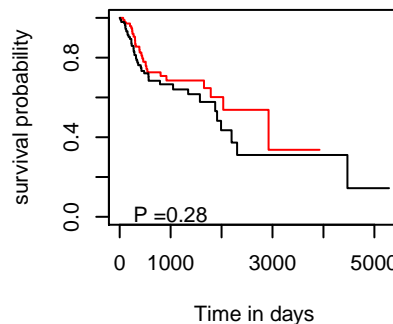

**DFI hsa-mir-6510**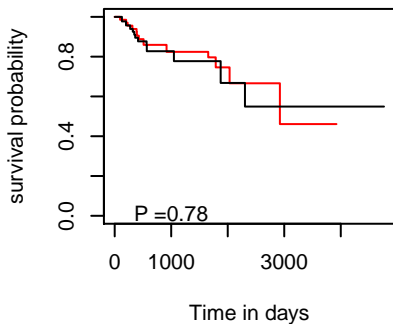**DSS hsa-mir-6510**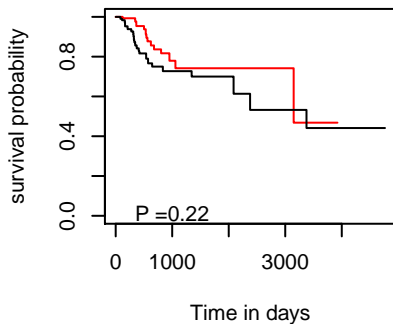**OS hsa-mir-580**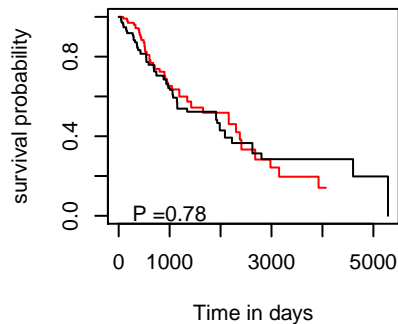**PFI hsa-mir-580**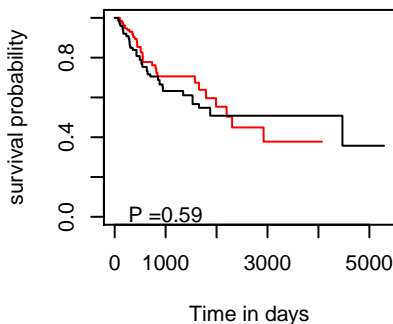**DFI hsa-mir-580**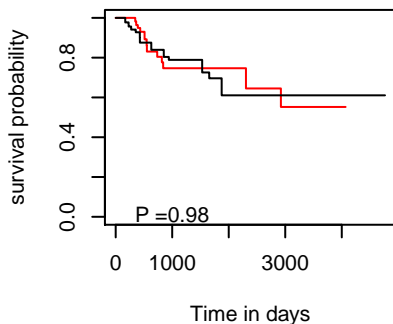**DSS hsa-mir-580**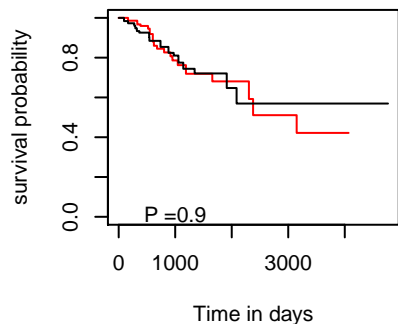**OS hsa-mir-133b**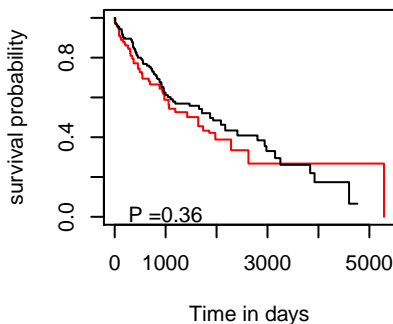**PFI hsa-mir-133b**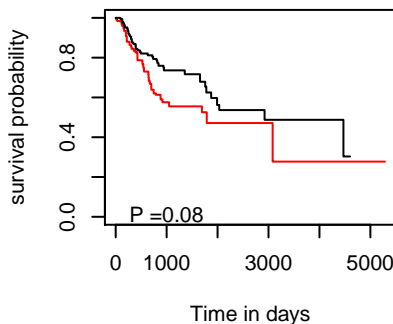**DFI hsa-mir-133b**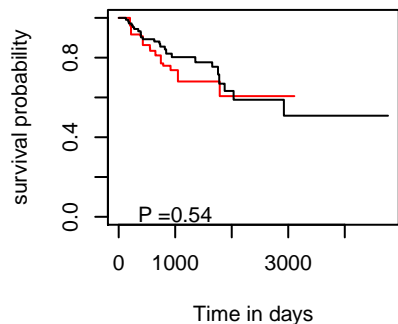

**DSS hsa-mir-133b**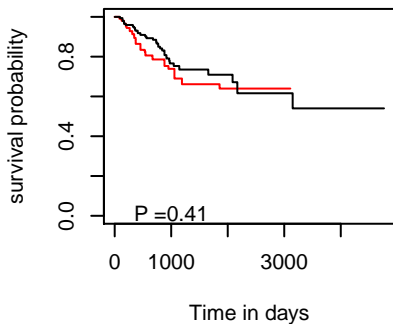**OS hsa-mir-3678**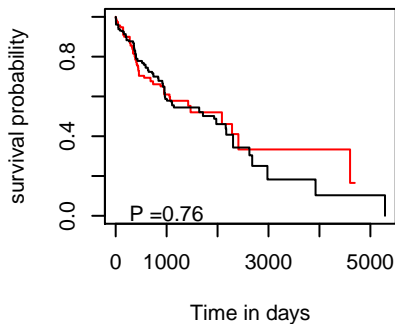**PFI hsa-mir-3678**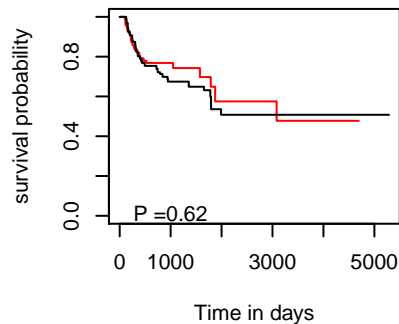**DFI hsa-mir-3678**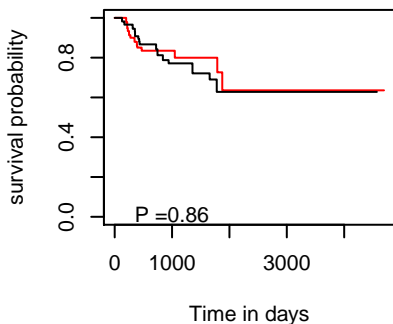**DSS hsa-mir-3678**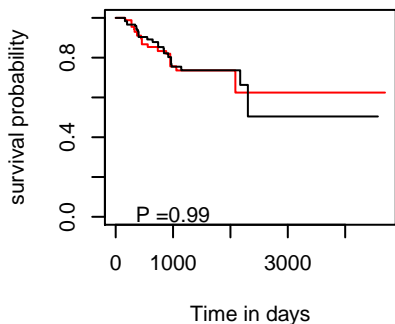**OS hsa-mir-636**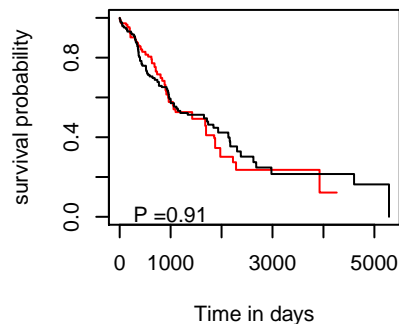**PFI hsa-mir-636**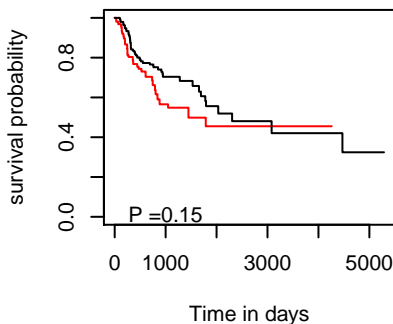**DFI hsa-mir-636**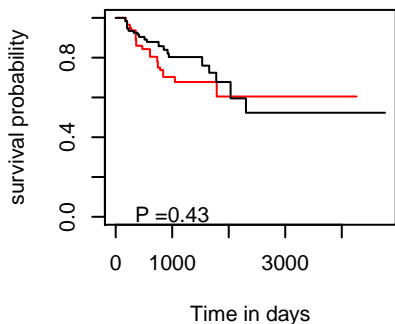**DSS hsa-mir-636**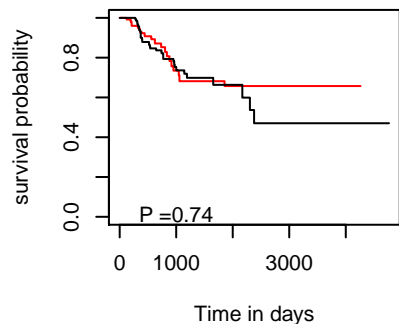

**OS hsa-mir-6516**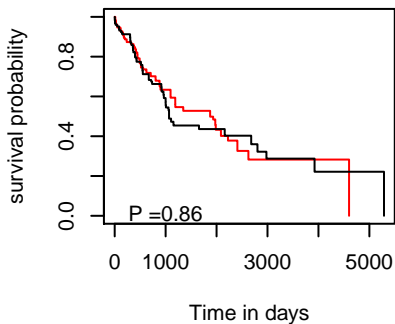**PFI hsa-mir-6516**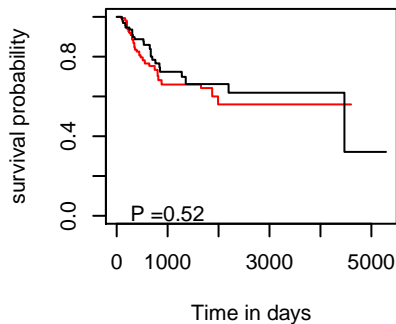**DFI hsa-mir-6516**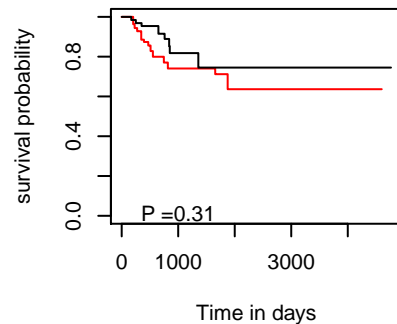**DSS hsa-mir-6516**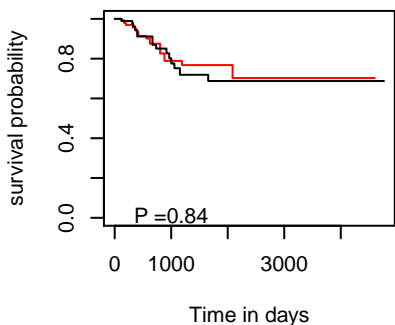**OS hsa-mir-6868**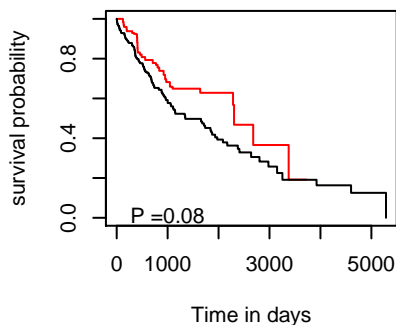**PFI hsa-mir-6868**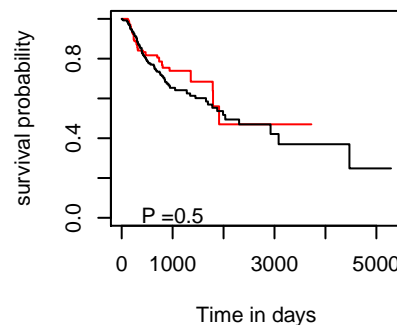**DFI hsa-mir-6868**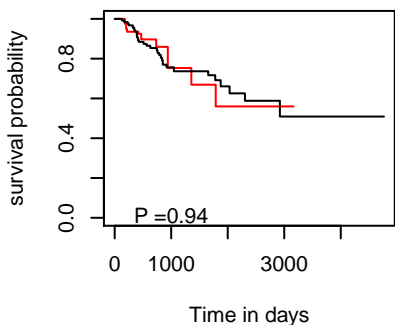**DSS hsa-mir-6868**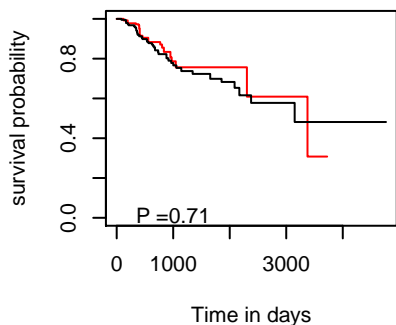**OS hsa-mir-6852**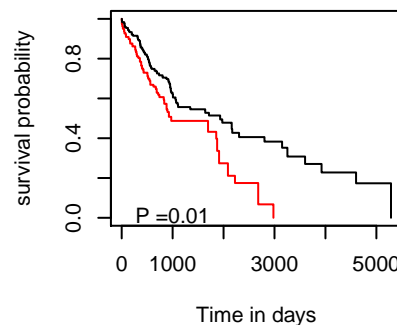

**PFI hsa-mir-6852**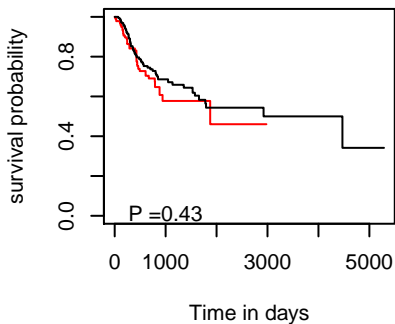**DFI hsa-mir-6852**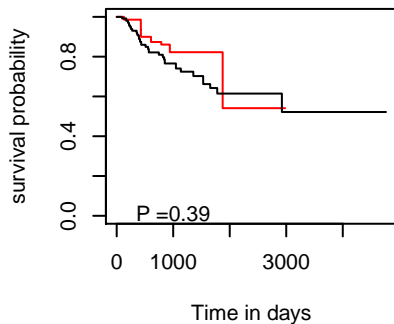**DSS hsa-mir-6852**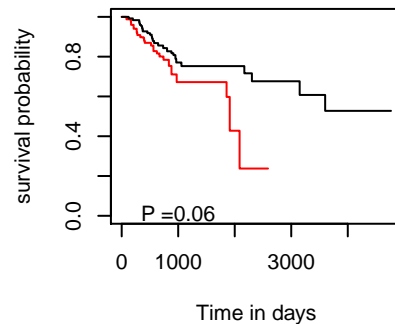**OS hsa-mir-31**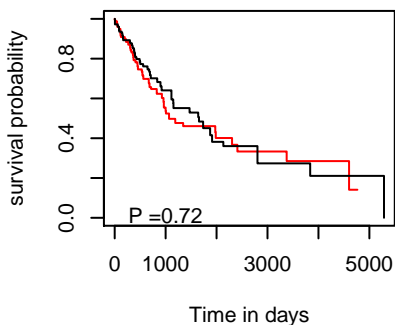**PFI hsa-mir-31**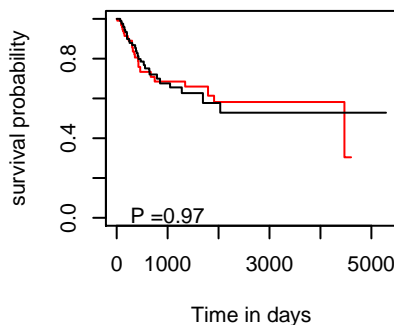**DFI hsa-mir-31**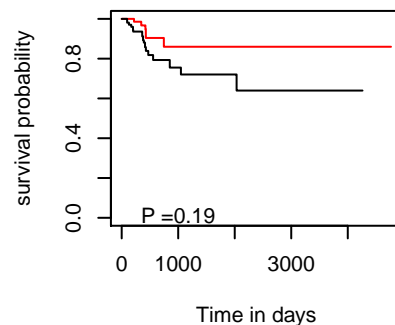**DSS hsa-mir-31**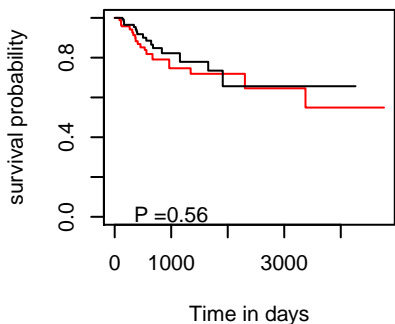**OS hsa-mir-491**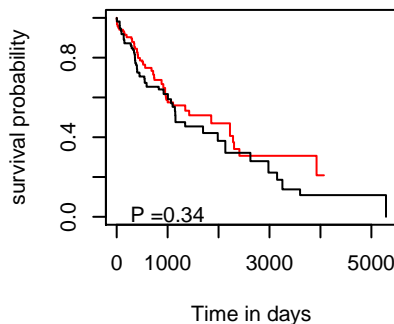**PFI hsa-mir-491**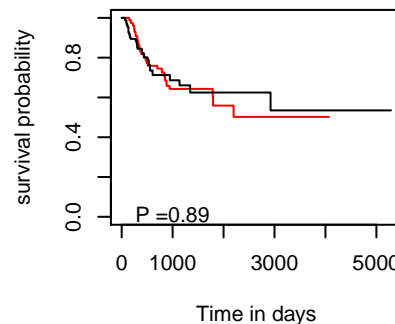

**DFI hsa-mir-491**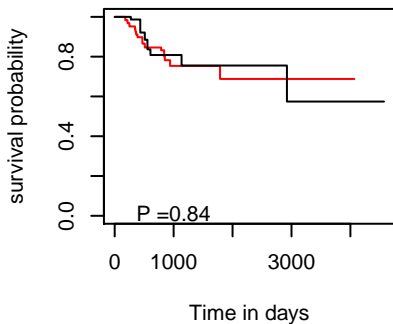**DSS hsa-mir-491**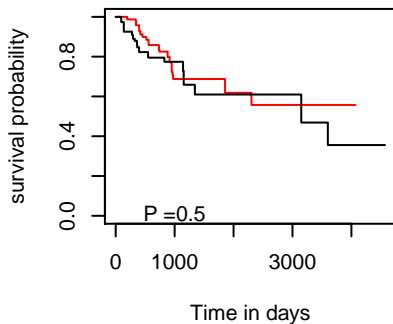**OS hsa-mir-671**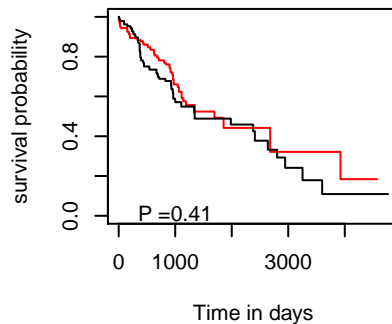**PFI hsa-mir-671**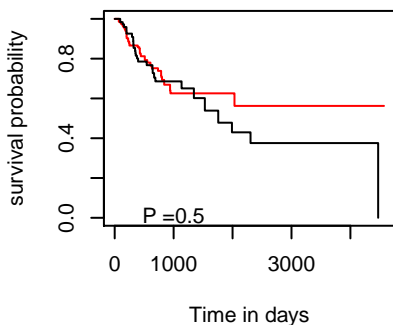**DFI hsa-mir-671**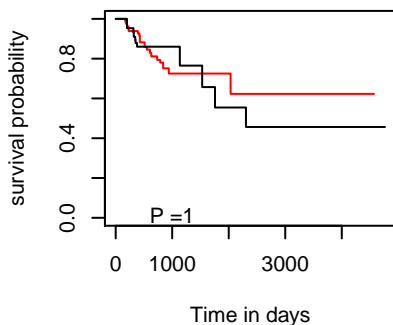**DSS hsa-mir-671**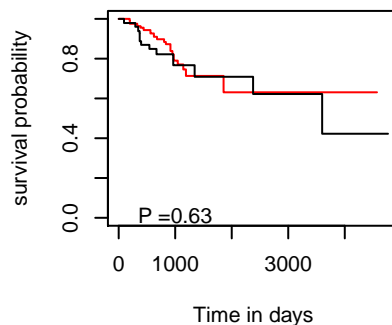**OS hsa-mir-6851**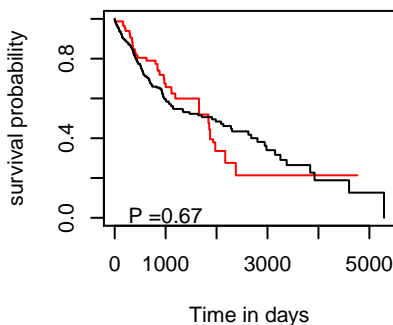**PFI hsa-mir-6851**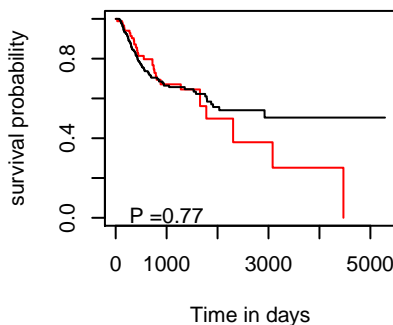**DFI hsa-mir-6851**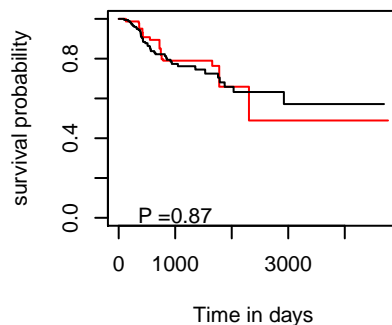

**DSS hsa-mir-6851**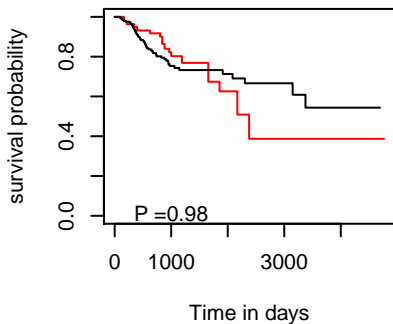**OS hsa-mir-548d-1**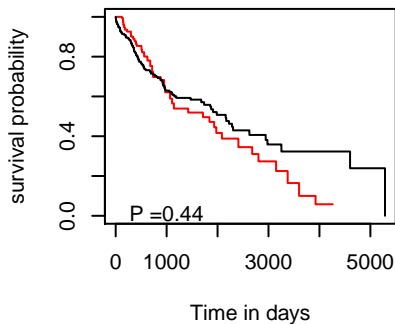**PFI hsa-mir-548d-1**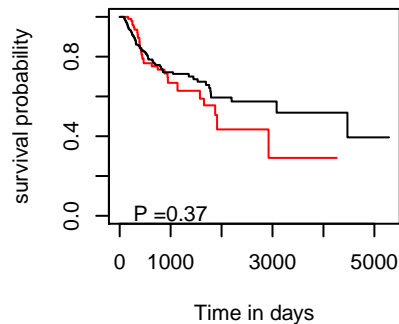**DFI hsa-mir-548d-1**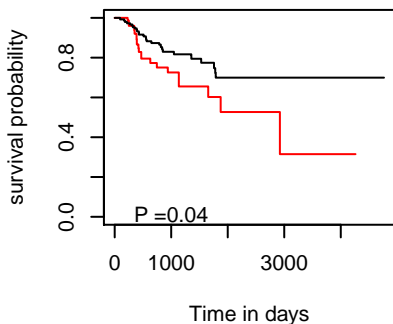**DSS hsa-mir-548d-1**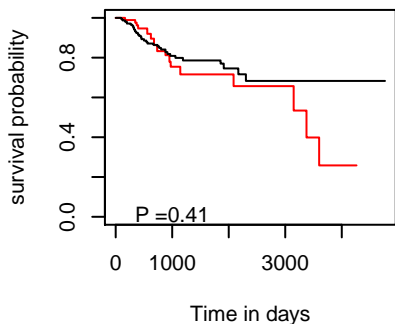**OS hsa-let-7b**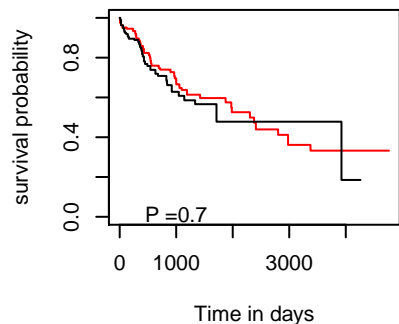**PFI hsa-let-7b**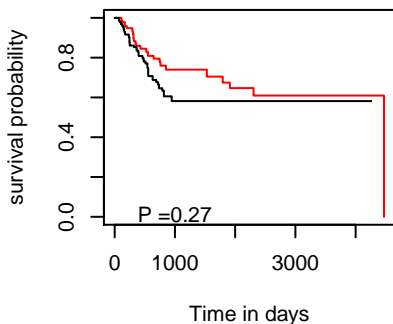**DFI hsa-let-7b**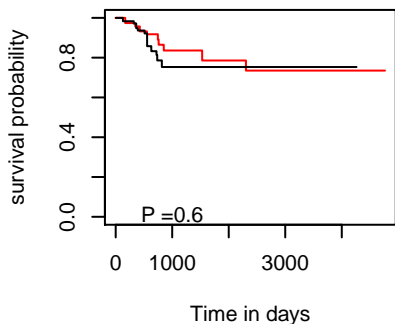**DSS hsa-let-7b**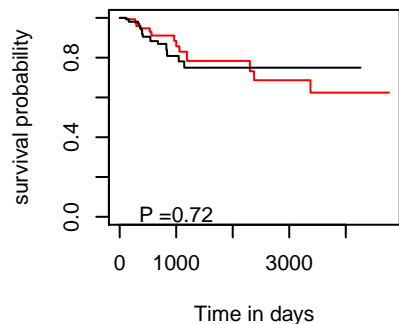

**OS hsa-mir-4763**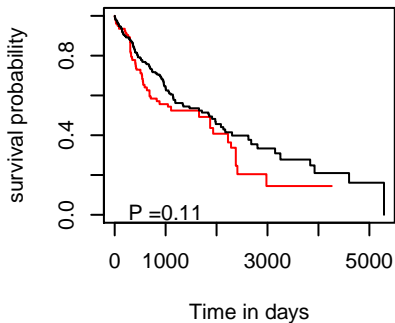**PFI hsa-mir-4763**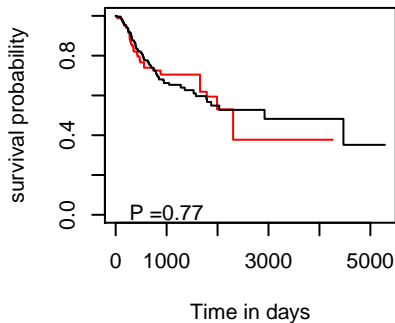**DFI hsa-mir-4763**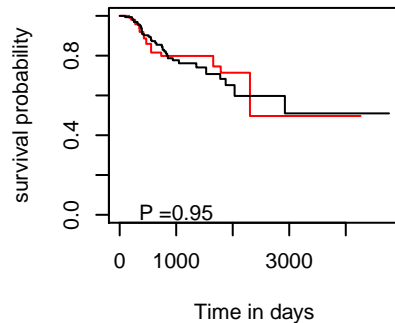**DSS hsa-mir-4763**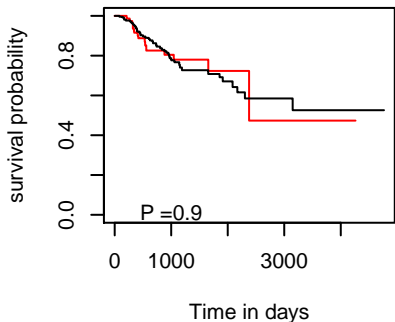**OS hsa-mir-486-2**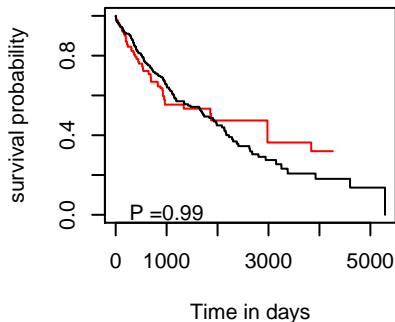**PFI hsa-mir-486-2**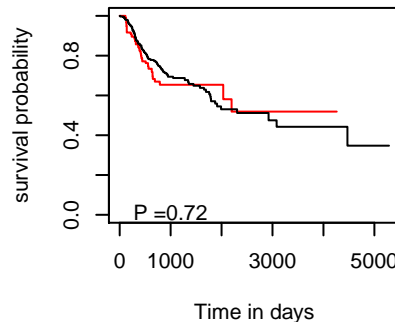**DFI hsa-mir-486-2**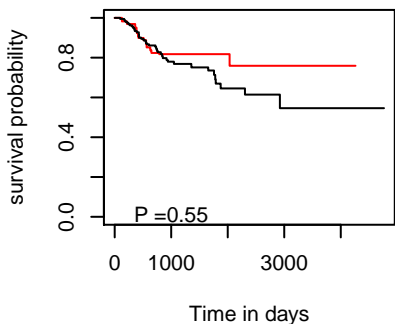**DSS hsa-mir-486-2**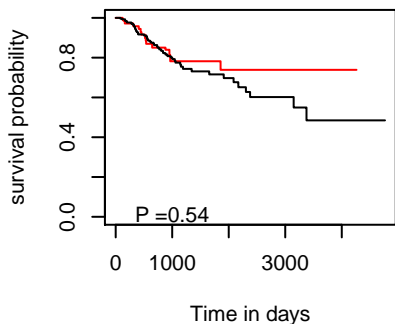**OS hsa-mir-582**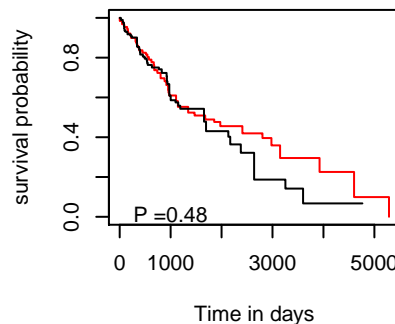

**PFI hsa-mir-582**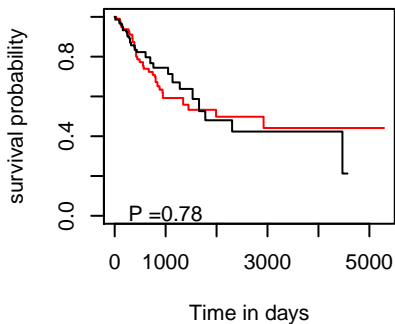**DFI hsa-mir-582**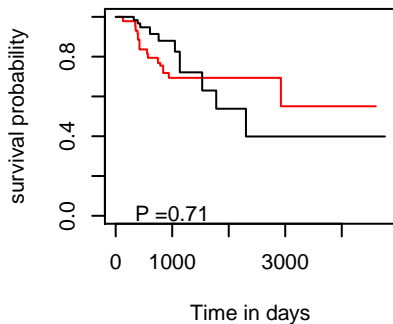**DSS hsa-mir-582**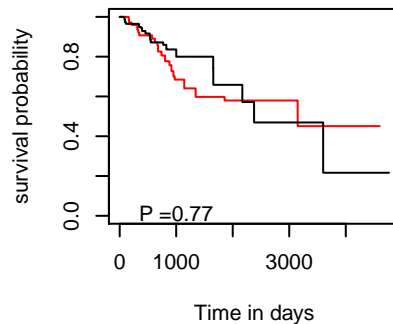**OS hsa-mir-4473**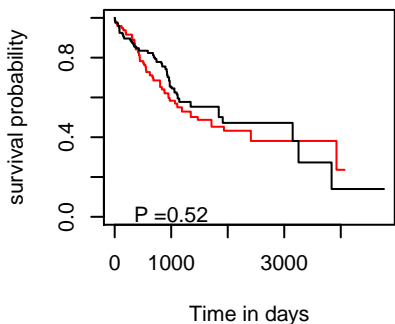**PFI hsa-mir-4473**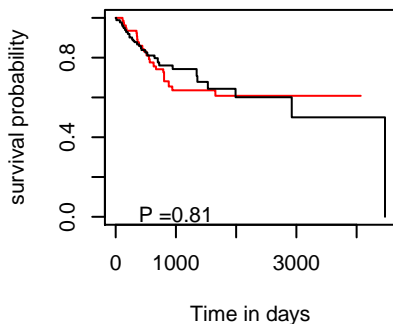**DFI hsa-mir-4473**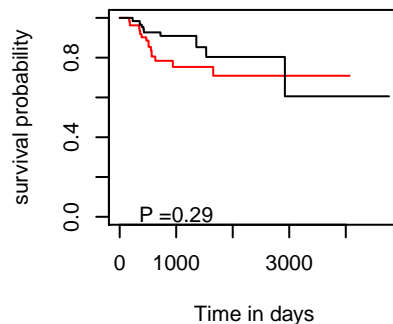**DSS hsa-mir-4473**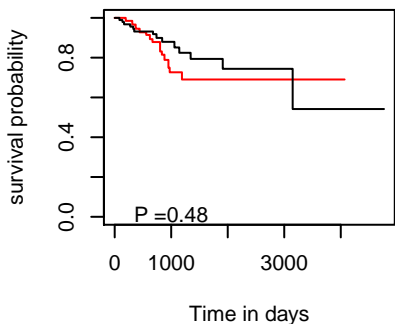**OS hsa-mir-4444-2**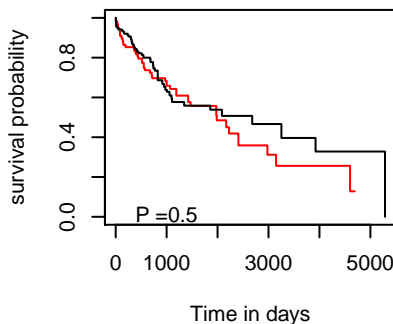**PFI hsa-mir-4444-2**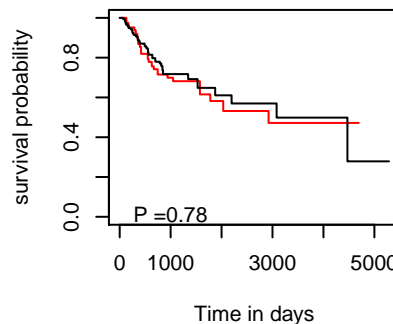

**DFI hsa-mir-4444-2**

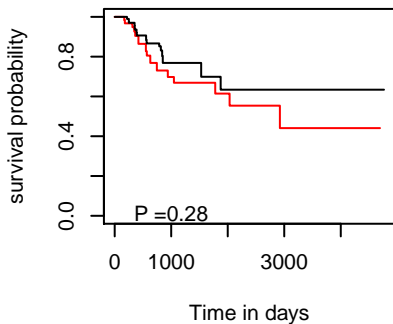

**DSS hsa-mir-4444-2**

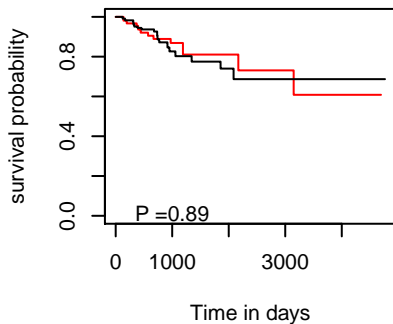

**OS hsa-mir-641**

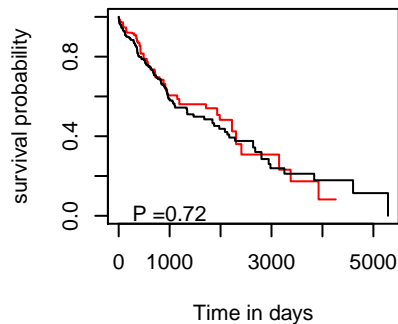

**PFI hsa-mir-641**

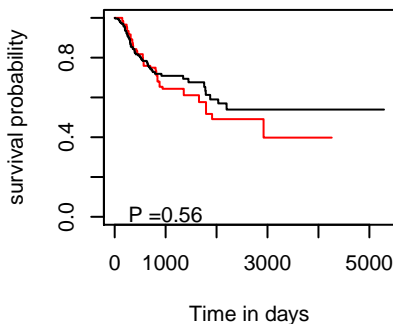

**DFI hsa-mir-641**

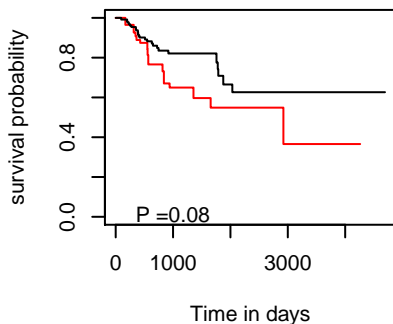

**DSS hsa-mir-641**

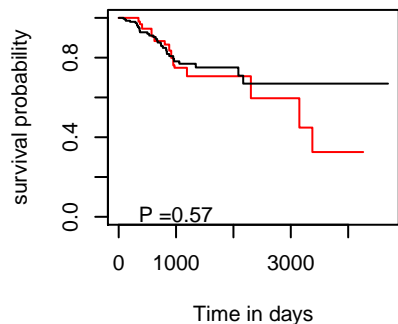

**OS hsa-mir-3926-1**

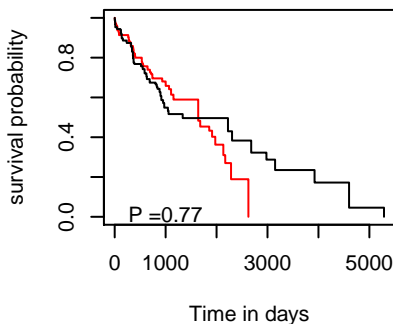

**PFI hsa-mir-3926-1**

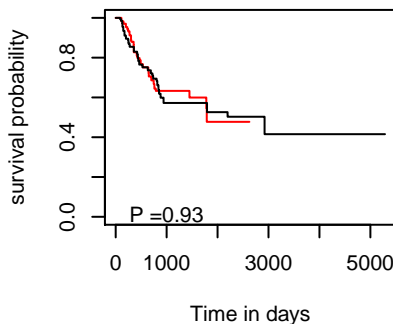

**DFI hsa-mir-3926-1**

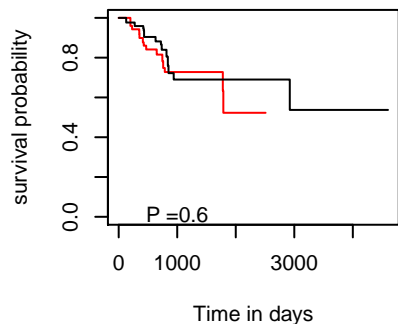

**DSS hsa-mir-3926-1**

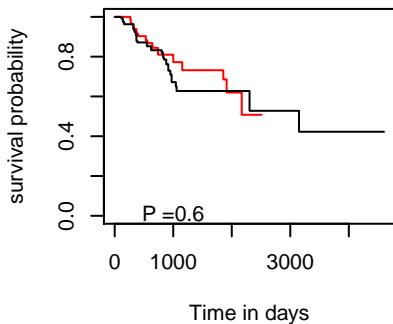

**OS hsa-mir-106b**

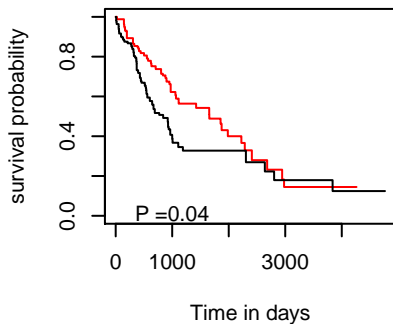

**PFI hsa-mir-106b**

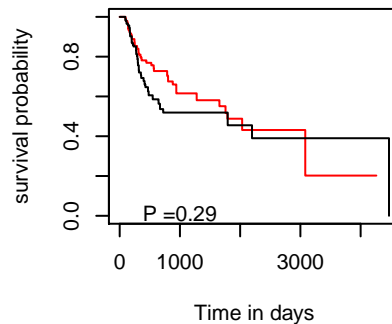

**DFI hsa-mir-106b**

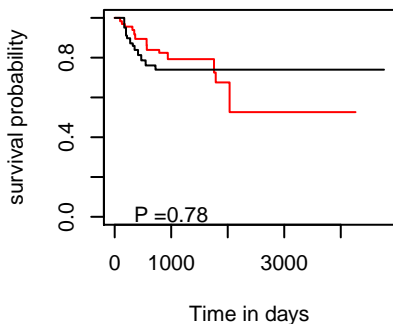

**DSS hsa-mir-106b**

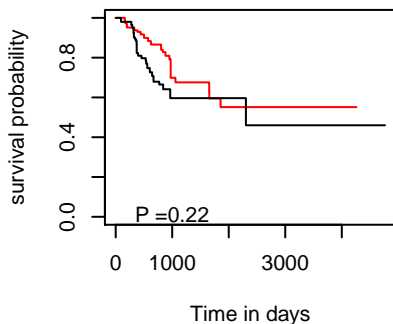

**OS hsa-mir-25**

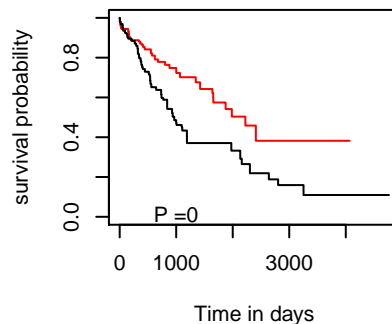

**PFI hsa-mir-25**

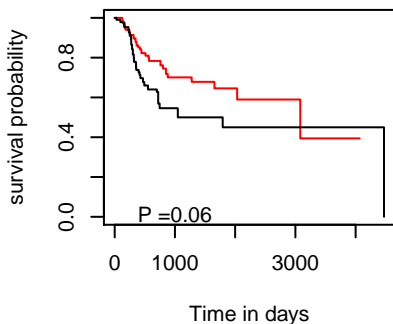

**DFI hsa-mir-25**

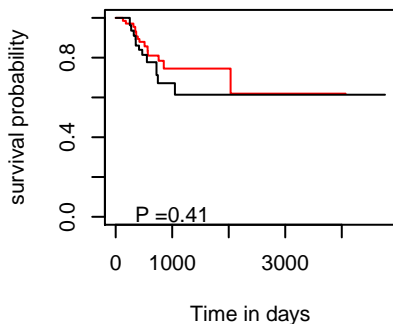

**DSS hsa-mir-25**

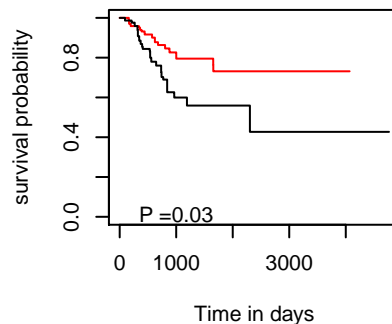

**OS hsa-mir-1246**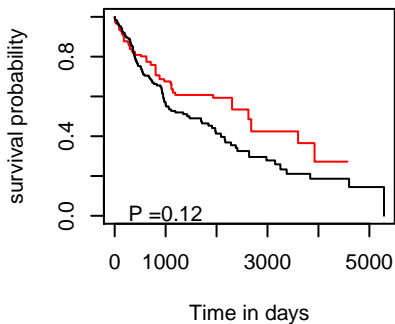**PFI hsa-mir-1246**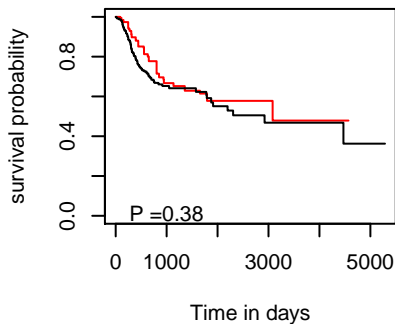**DFI hsa-mir-1246**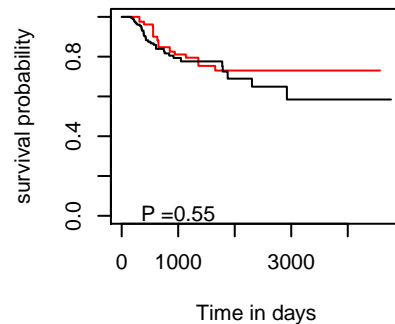**DSS hsa-mir-1246**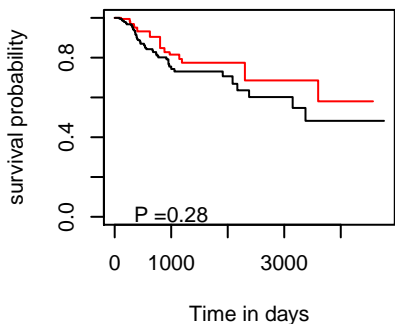**OS hsa-mir-4652**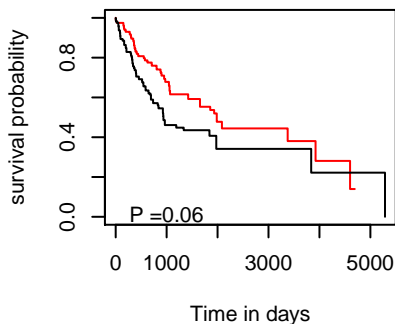**PFI hsa-mir-4652**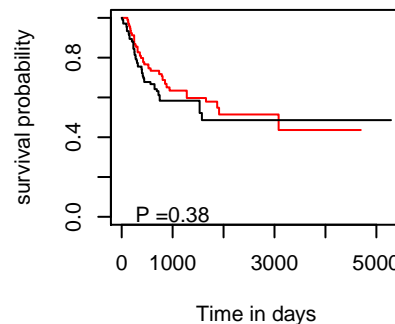**DFI hsa-mir-4652**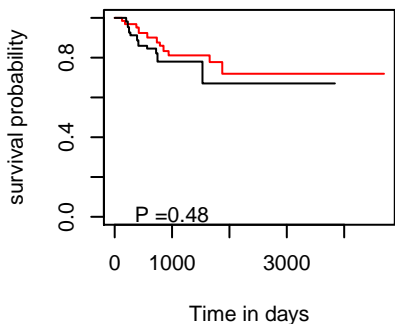**DSS hsa-mir-4652**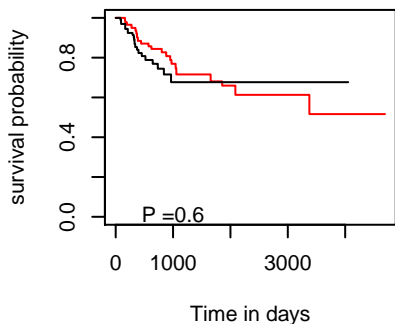**OS hsa-mir-3923**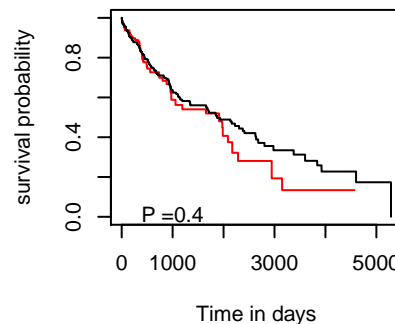

**PFI hsa-mir-3923**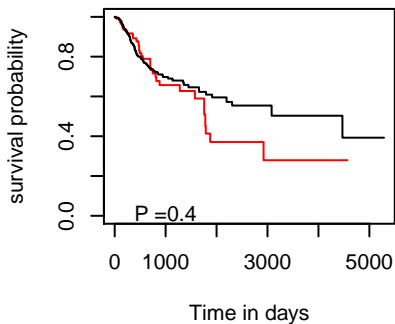**DFI hsa-mir-3923**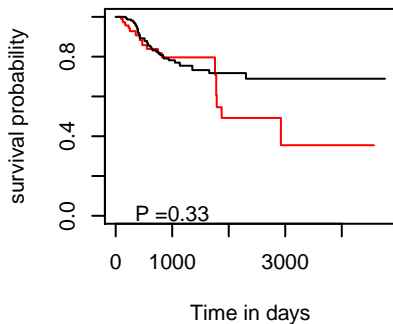**DSS hsa-mir-3923**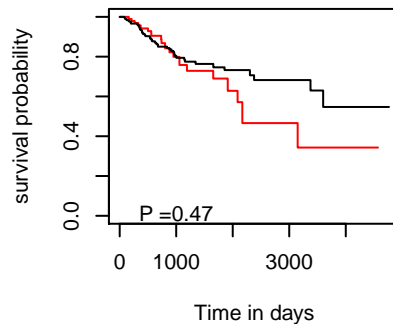**OS hsa-mir-3667**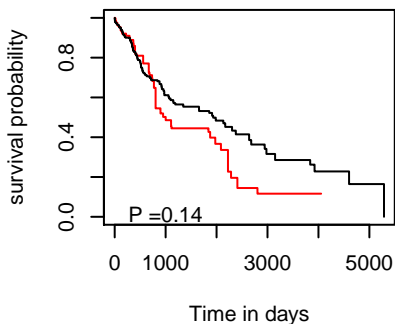**PFI hsa-mir-3667**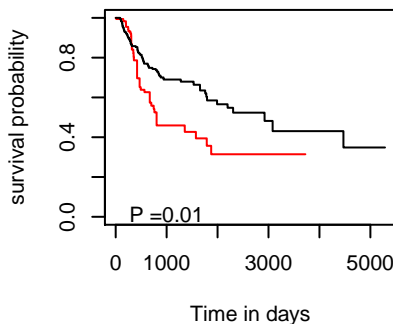**DFI hsa-mir-3667**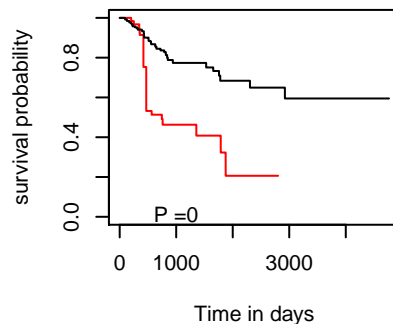**DSS hsa-mir-3667**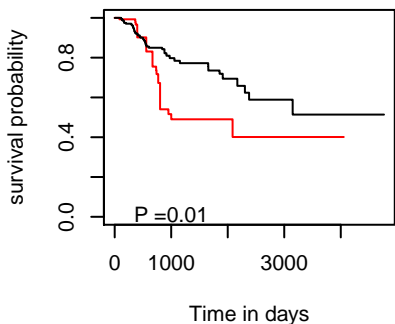**OS hsa-mir-675**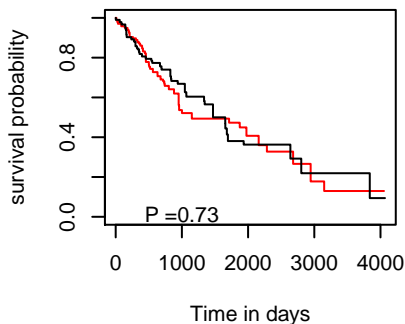**PFI hsa-mir-675**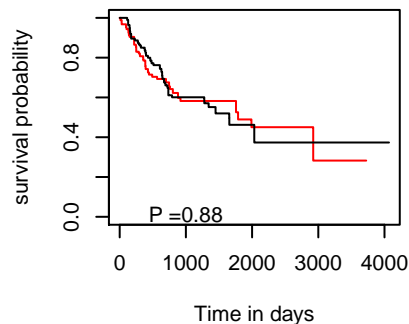

**DFI hsa-mir-675**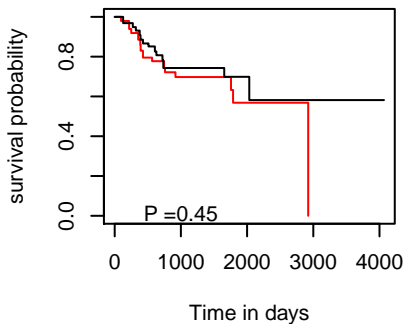**DSS hsa-mir-675**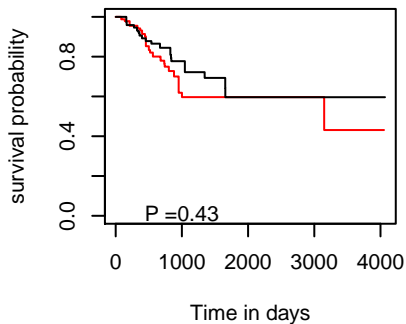**OS hsa-mir-6802**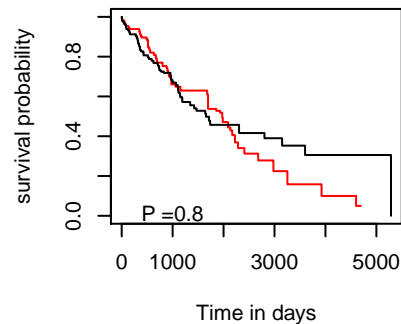**PFI hsa-mir-6802**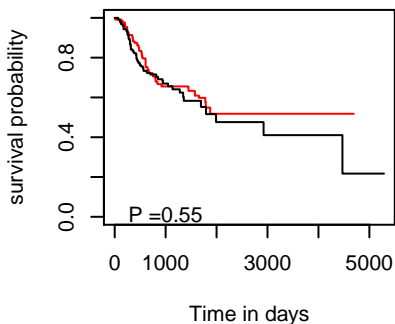**DFI hsa-mir-6802**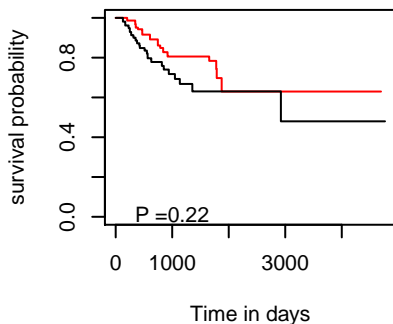**DSS hsa-mir-6802**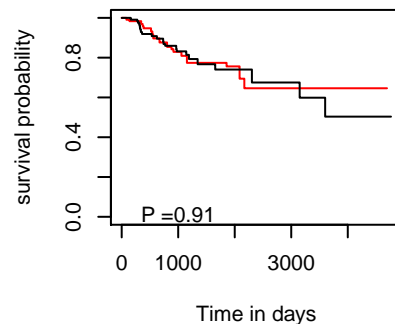**OS hsa-mir-6803**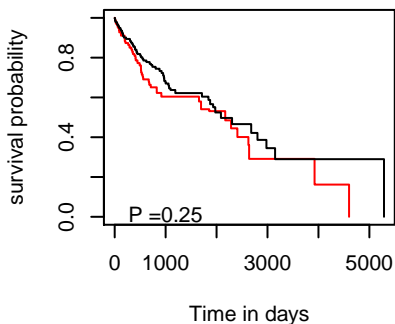**PFI hsa-mir-6803**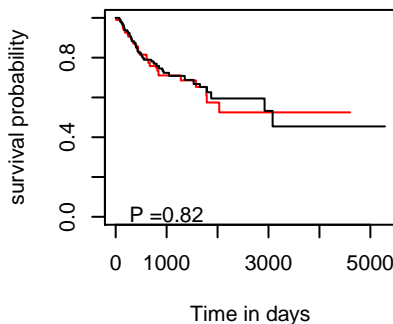**DFI hsa-mir-6803**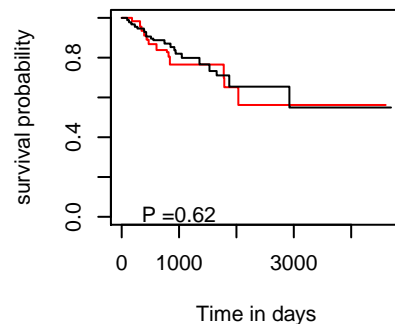



**OS hsa-mir-3913-1**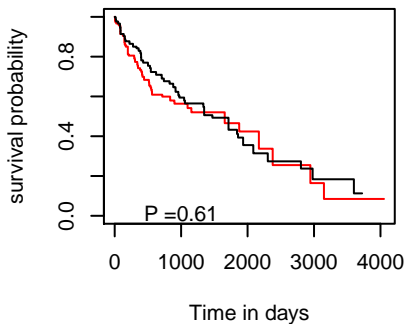**PFI hsa-mir-3913-1**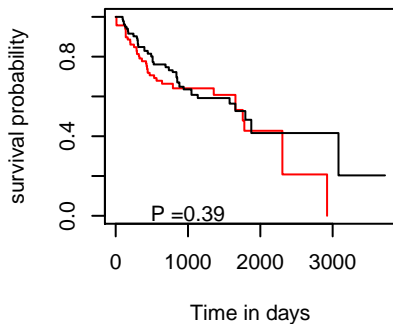**DFI hsa-mir-3913-1**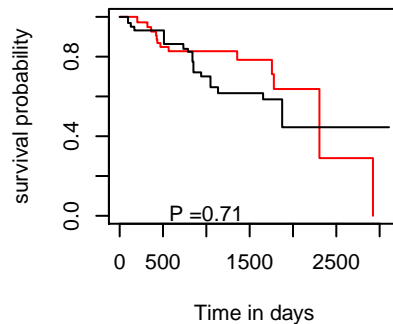**DSS hsa-mir-3913-1**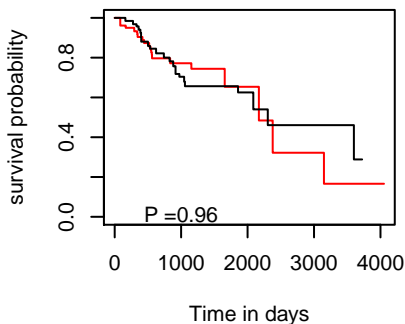**OS hsa-mir-489**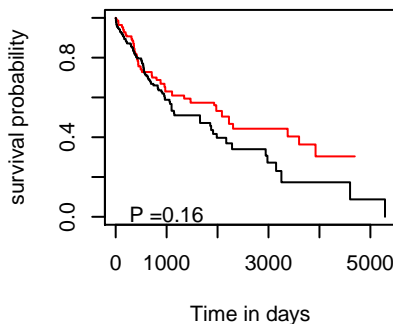**PFI hsa-mir-489**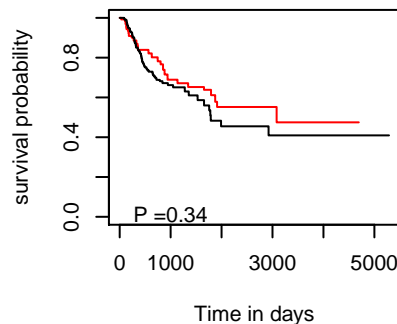**DFI hsa-mir-489**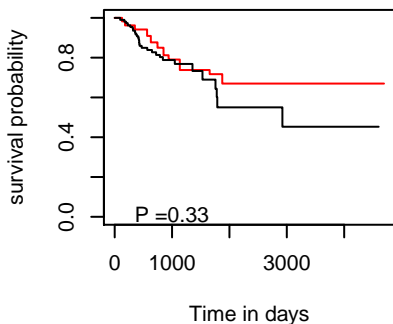**DSS hsa-mir-489**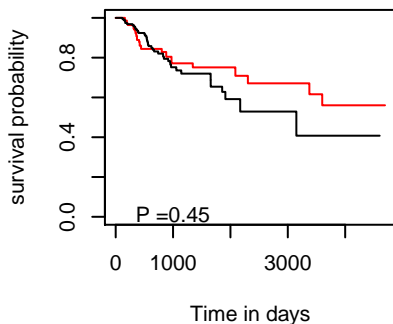**OS hsa-mir-653**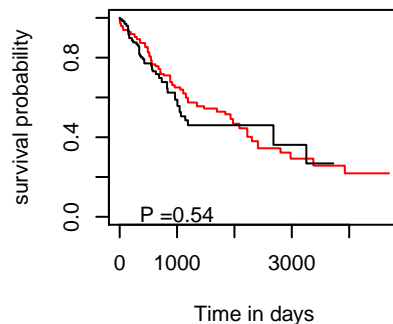

**PFI hsa-mir-653**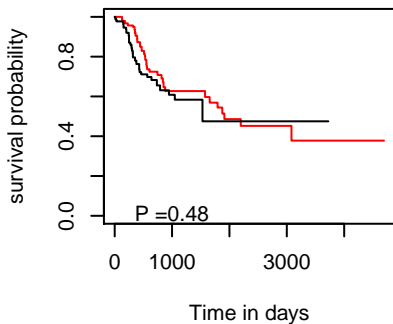**DFI hsa-mir-653**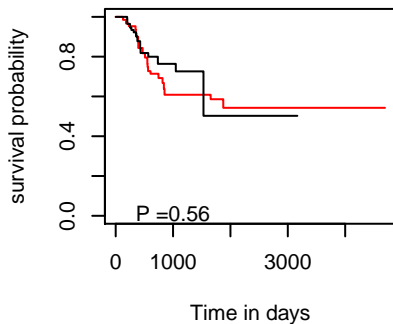**DSS hsa-mir-653**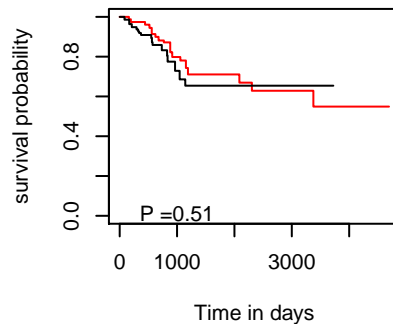**OS hsa-mir-4778**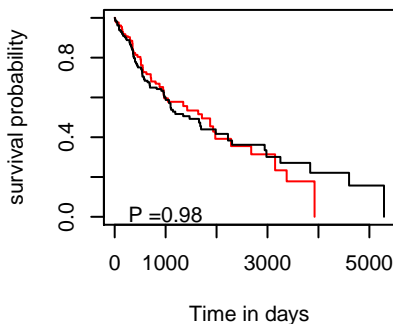**PFI hsa-mir-4778**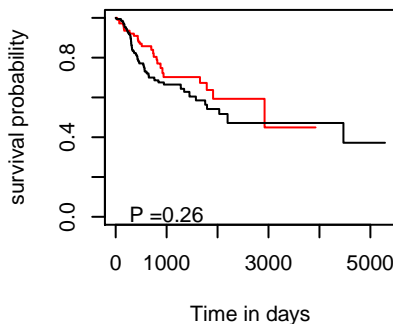**DFI hsa-mir-4778**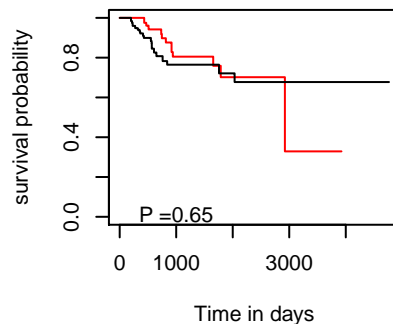**DSS hsa-mir-4778**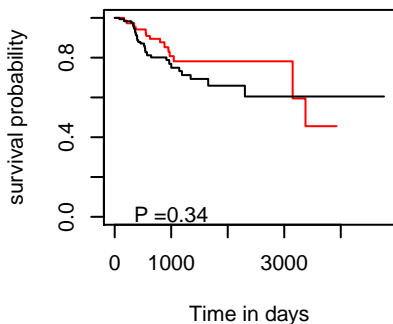**OS hsa-mir-4492**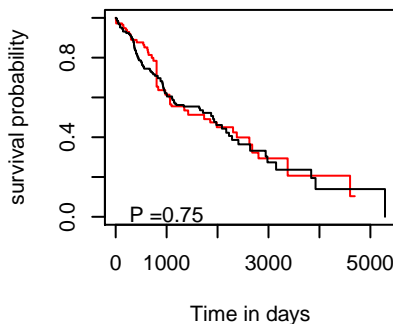**PFI hsa-mir-4492**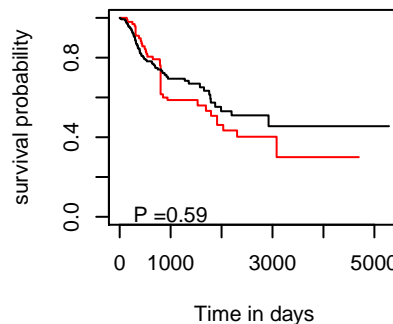

**DFI hsa-mir-4492**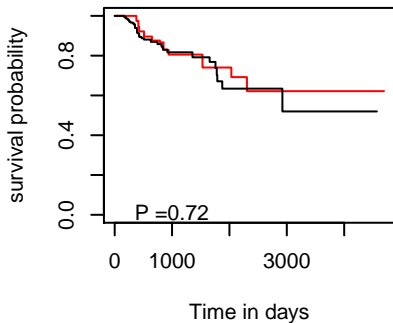**DSS hsa-mir-4492**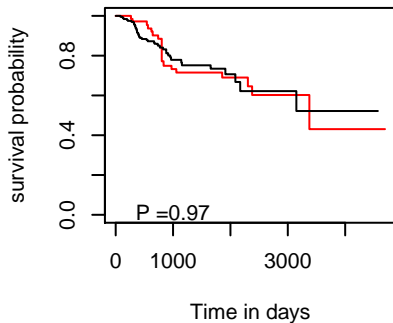**OS hsa-mir-3193**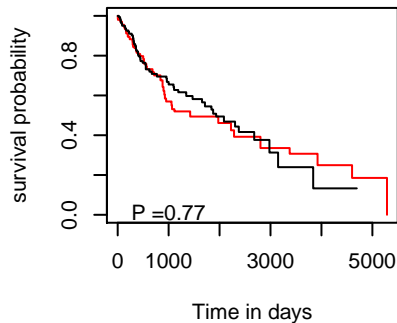**PFI hsa-mir-3193**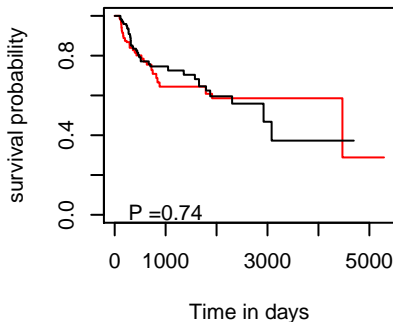**DFI hsa-mir-3193**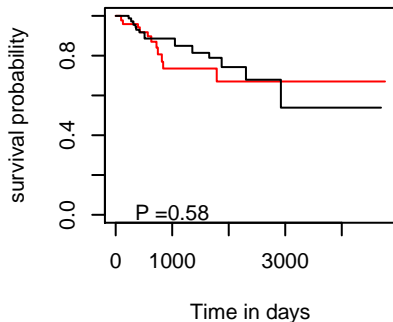**DSS hsa-mir-3193**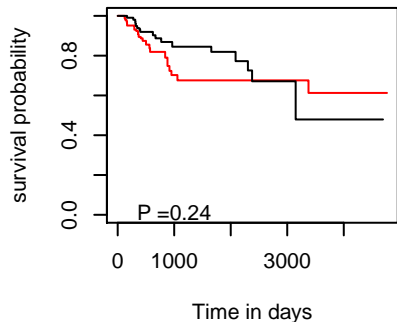**OS hsa-mir-6502**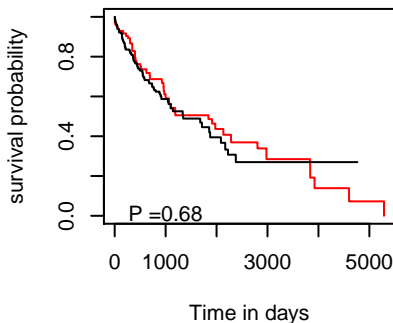**PFI hsa-mir-6502**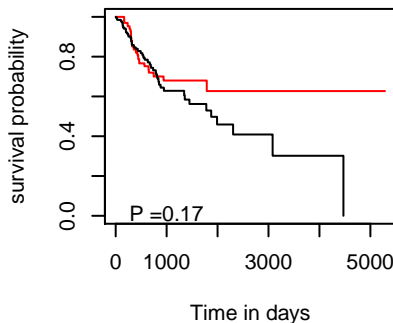**DFI hsa-mir-6502**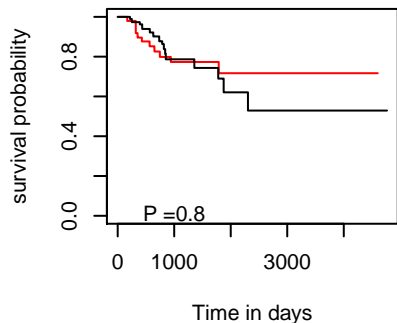

**DSS hsa-mir-6502**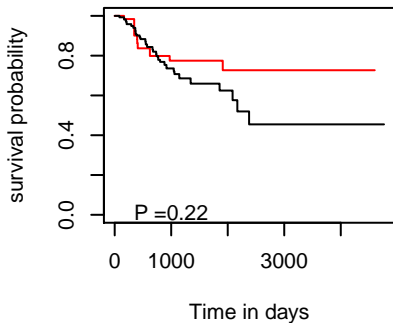**OS hsa-mir-3664**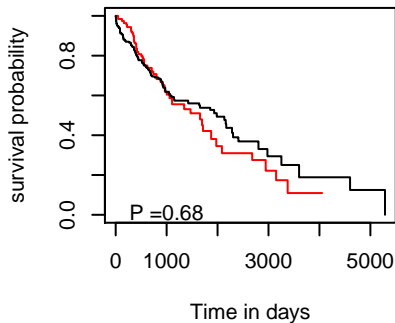**PFI hsa-mir-3664**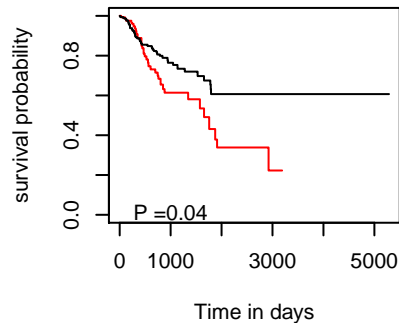**DFI hsa-mir-3664**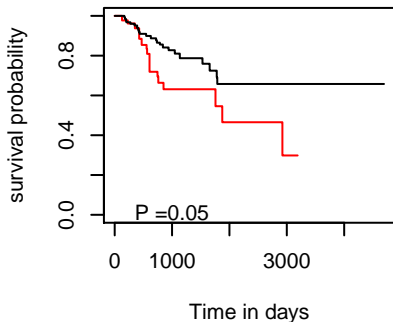**DSS hsa-mir-3664**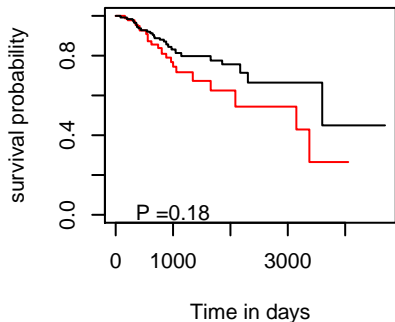**OS hsa-mir-185**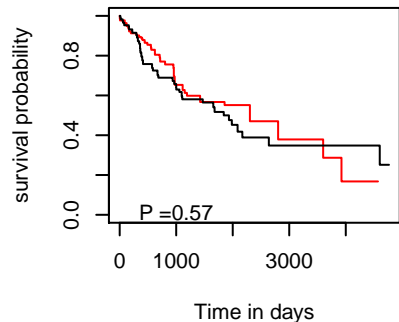**PFI hsa-mir-185**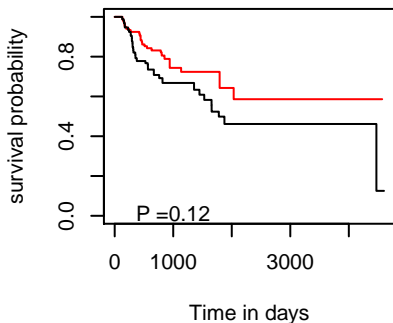**DFI hsa-mir-185**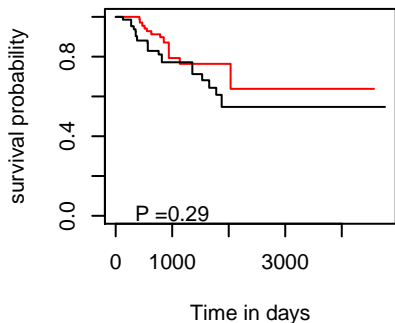**DSS hsa-mir-185**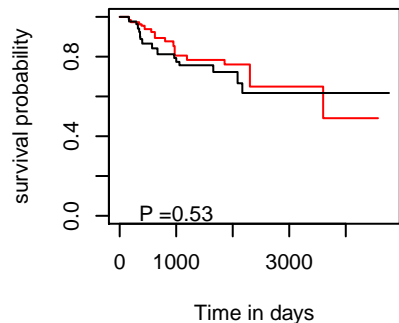

**OS hsa-mir-130b**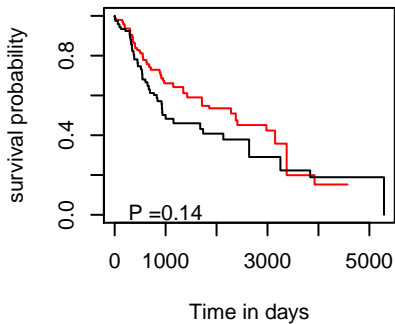**PFI hsa-mir-130b**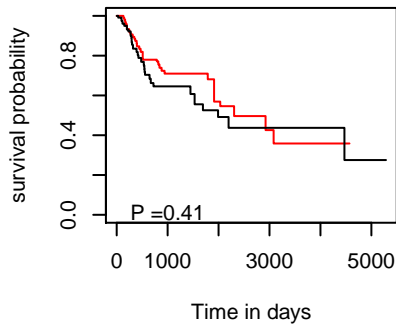**DFI hsa-mir-130b**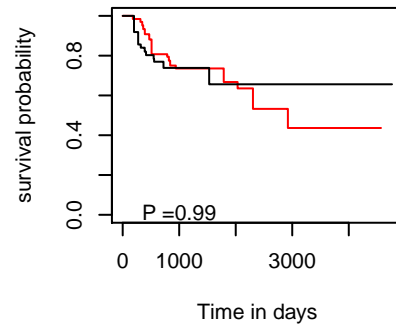**DSS hsa-mir-130b**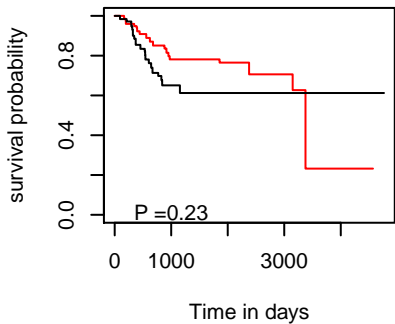**OS hsa-mir-4755**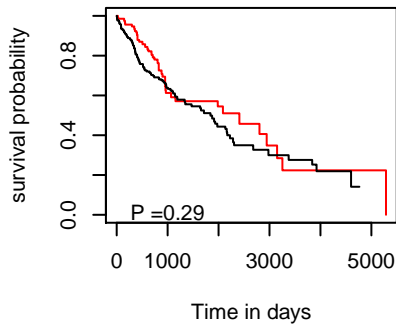**PFI hsa-mir-4755**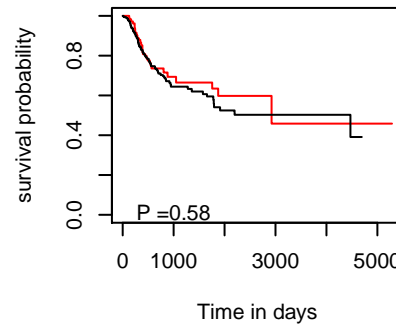**DFI hsa-mir-4755**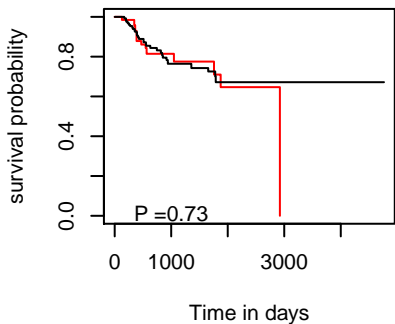**DSS hsa-mir-4755**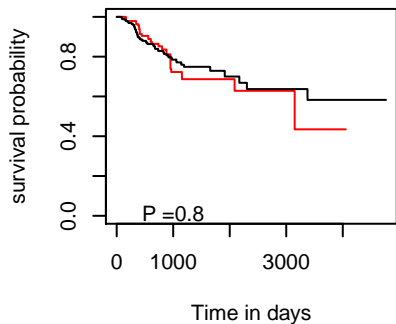**OS hsa-mir-6511b-1**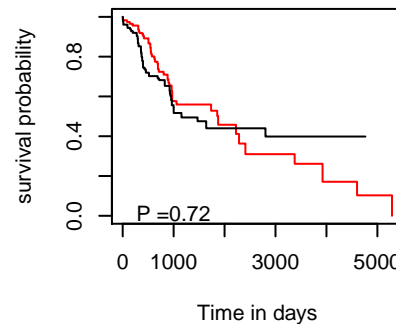

**PFI hsa-mir-6511b-1**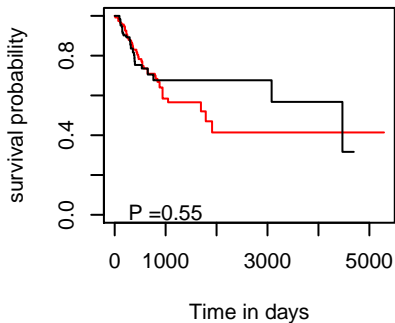**DFI hsa-mir-6511b-1**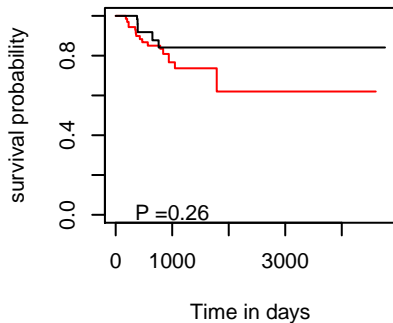**DSS hsa-mir-6511b-1**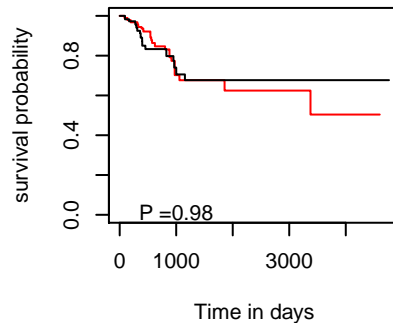**OS hsa-mir-4662a**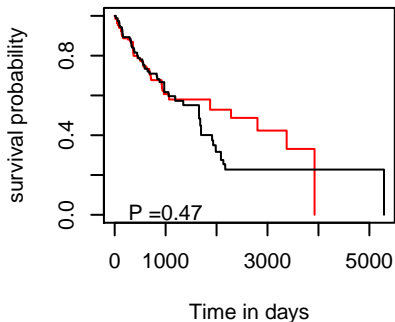**PFI hsa-mir-4662a**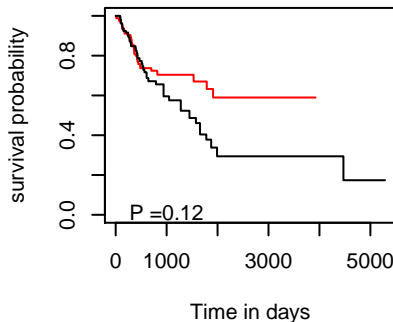**DFI hsa-mir-4662a**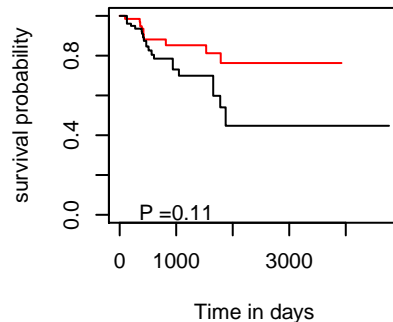**DSS hsa-mir-4662a**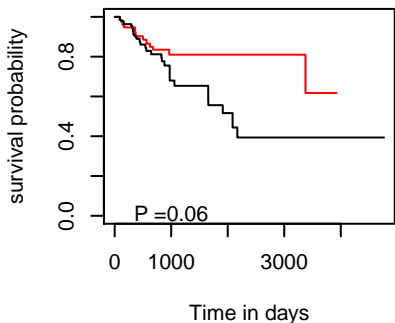**OS hsa-mir-937**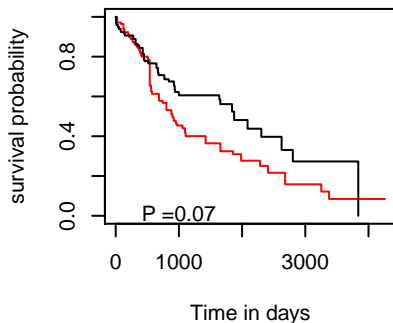**PFI hsa-mir-937**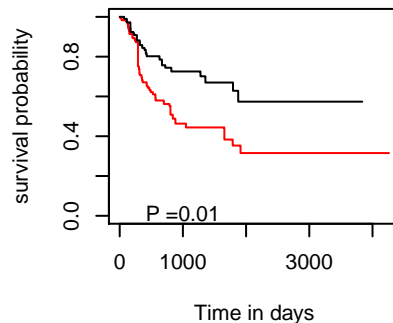

**DFI hsa-mir-937**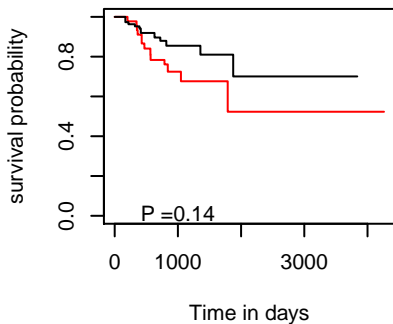**DSS hsa-mir-937**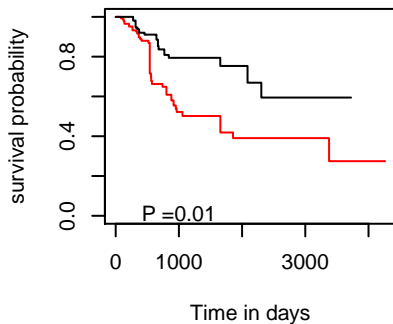**OS hsa-mir-5687**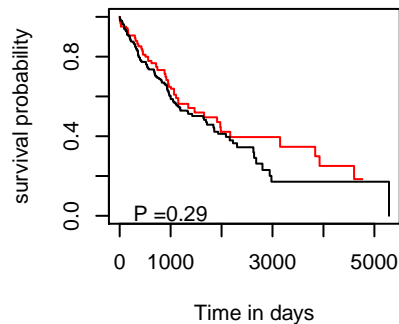**PFI hsa-mir-5687**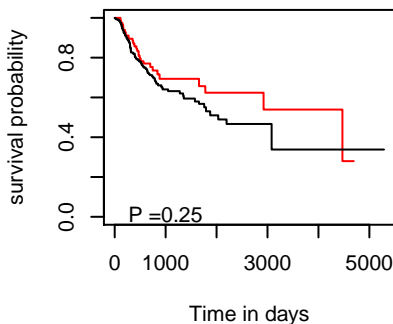**DFI hsa-mir-5687**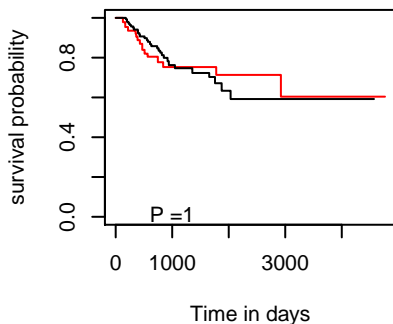**DSS hsa-mir-5687**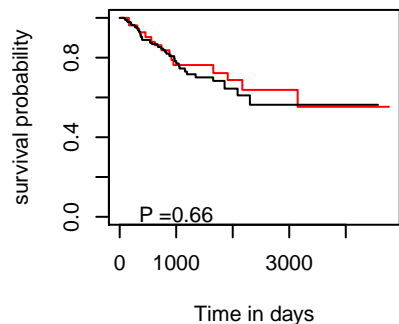**OS hsa-mir-9-3**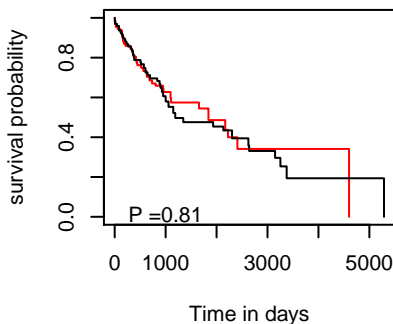**PFI hsa-mir-9-3**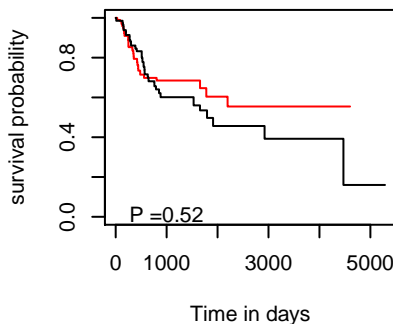**DFI hsa-mir-9-3**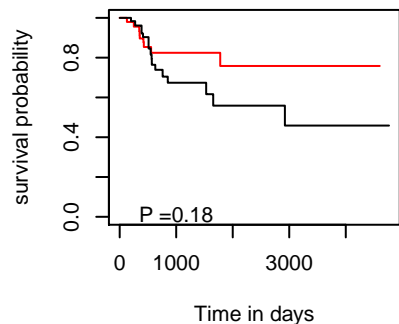



**OS hsa-mir-1179**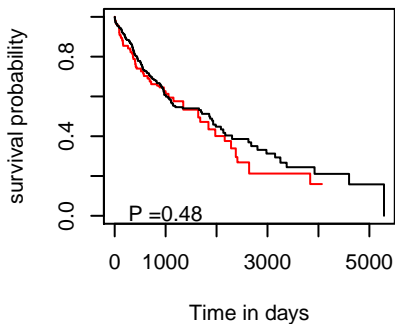**PFI hsa-mir-1179**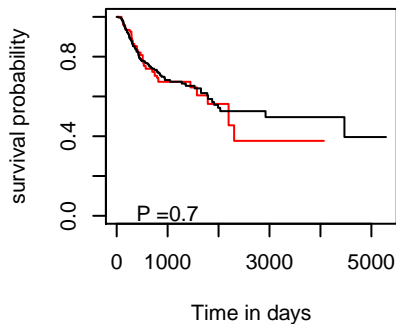**DFI hsa-mir-1179**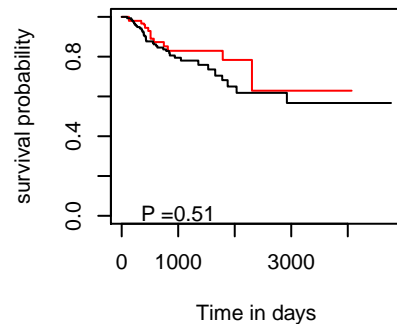**DSS hsa-mir-1179**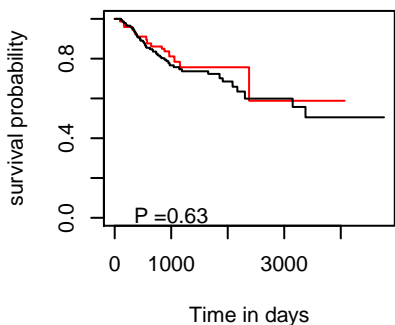**OS hsa-mir-3174**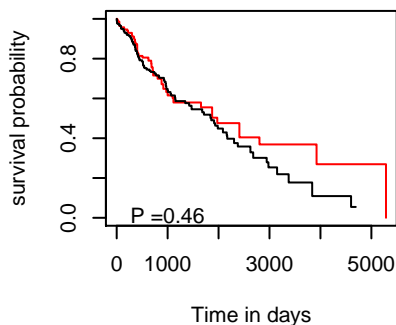**PFI hsa-mir-3174**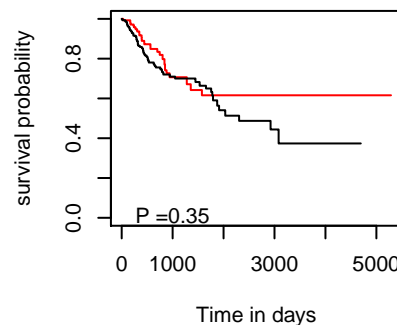**DFI hsa-mir-3174**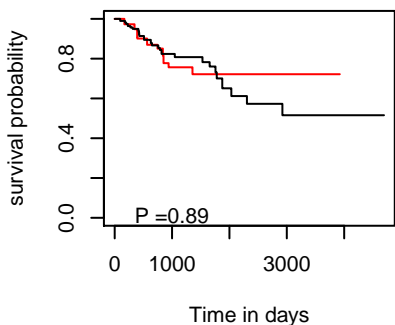**DSS hsa-mir-3174**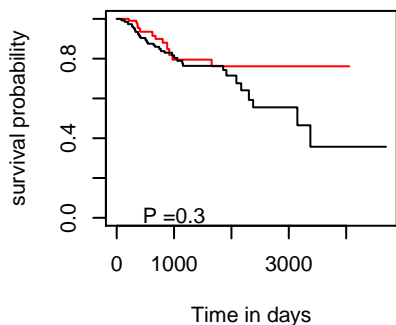**OS hsa-mir-4286**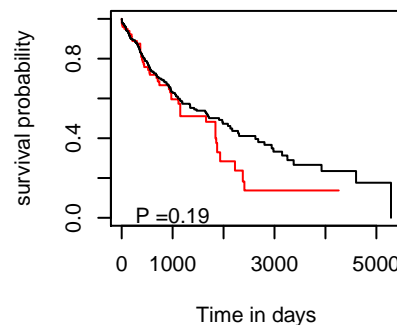

**PFI hsa-mir-4286**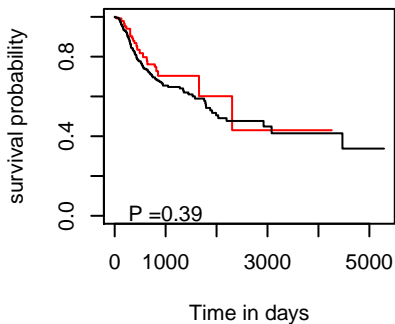**DFI hsa-mir-4286**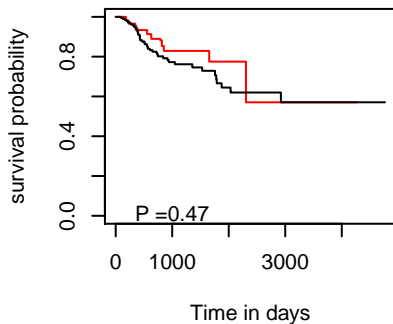**DSS hsa-mir-4286**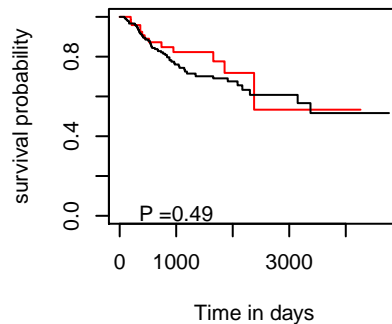**OS hsa-mir-3187**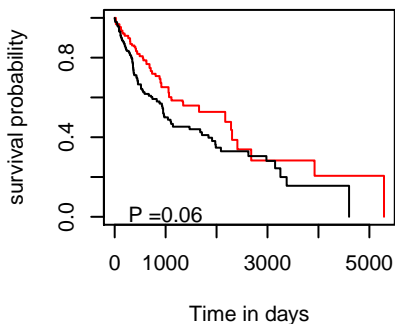**PFI hsa-mir-3187**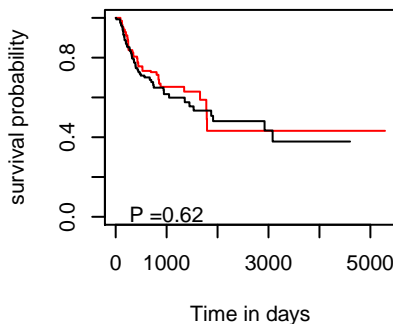**DFI hsa-mir-3187**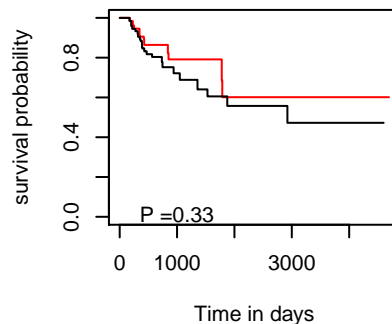**DSS hsa-mir-3187**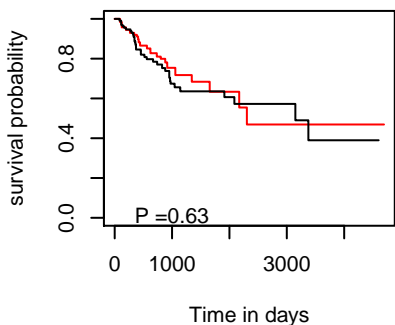**OS hsa-mir-210**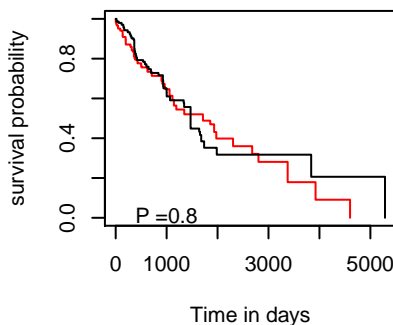**PFI hsa-mir-210**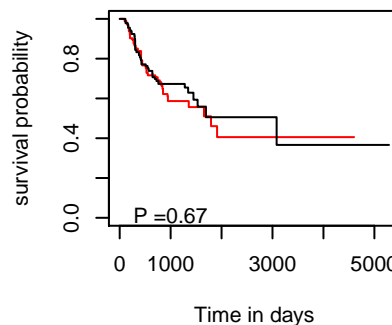

**DFI hsa-mir-210**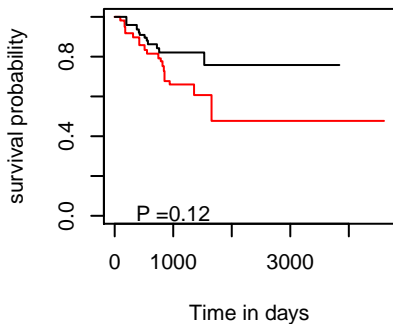**DSS hsa-mir-210**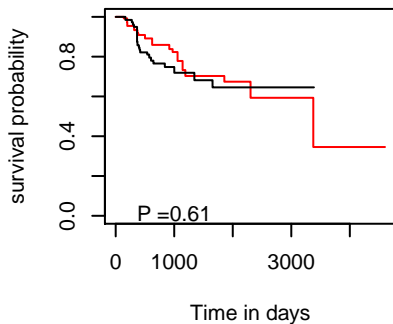**OS hsa-mir-5699**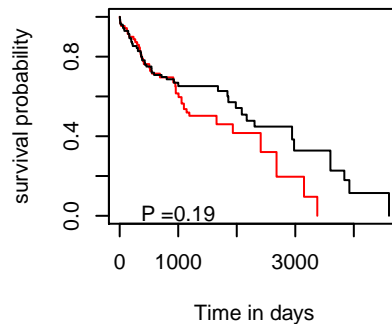**PFI hsa-mir-5699**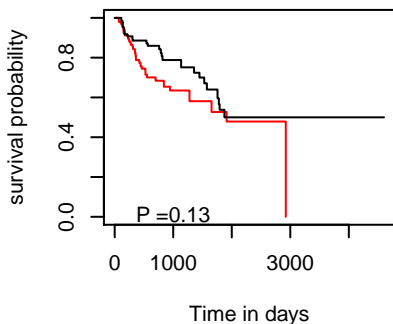**DFI hsa-mir-5699**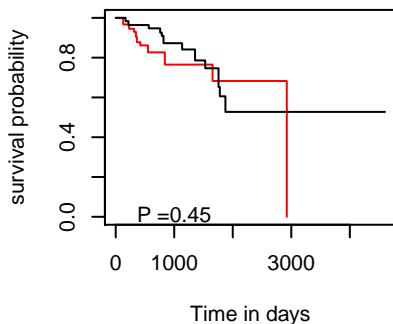**DSS hsa-mir-5699**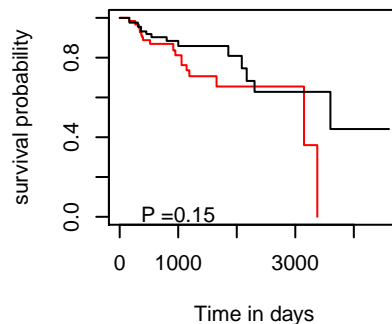**OS hsa-mir-30b**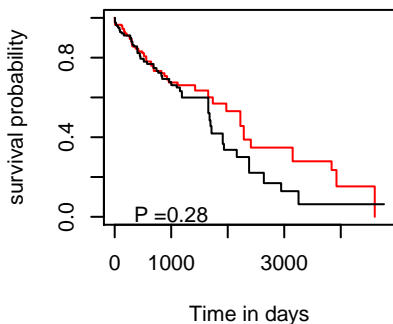**PFI hsa-mir-30b**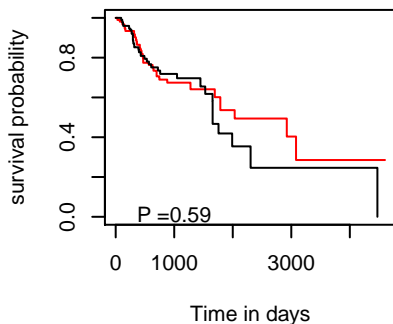**DFI hsa-mir-30b**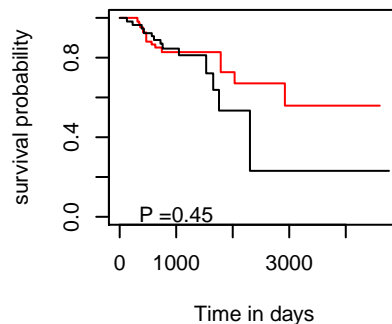

**DSS hsa-mir-30b**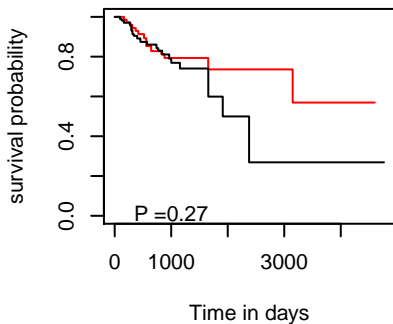**OS hsa-mir-30d**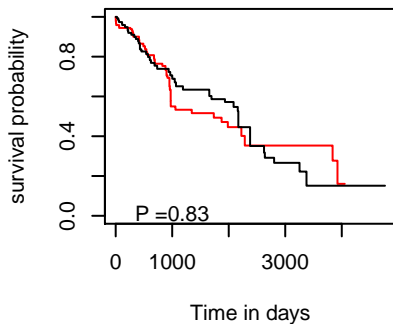**PFI hsa-mir-30d**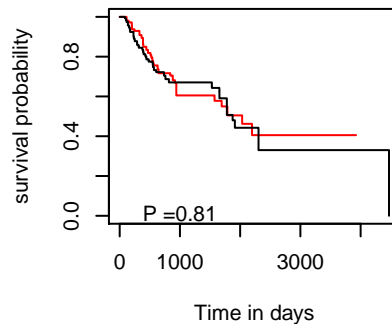**DFI hsa-mir-30d**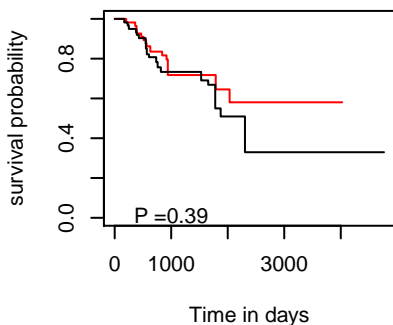**DSS hsa-mir-30d**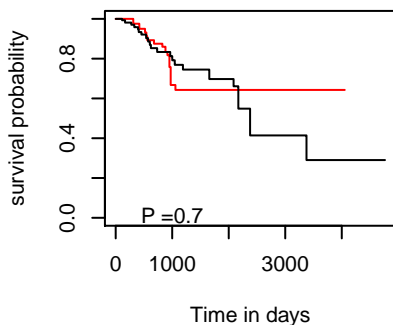**OS hsa-mir-139**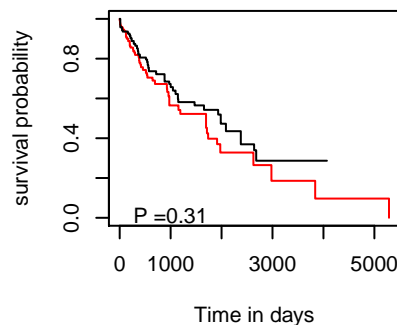**PFI hsa-mir-139**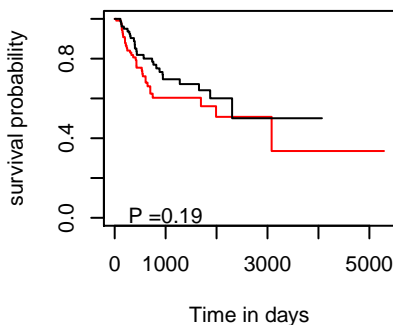**DFI hsa-mir-139**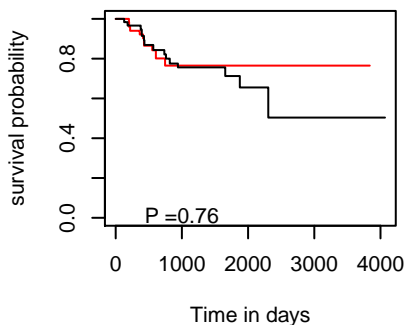**DSS hsa-mir-139**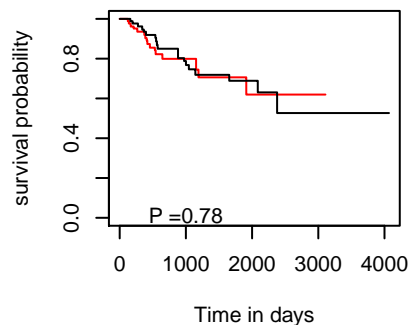

**OS hsa-mir-326**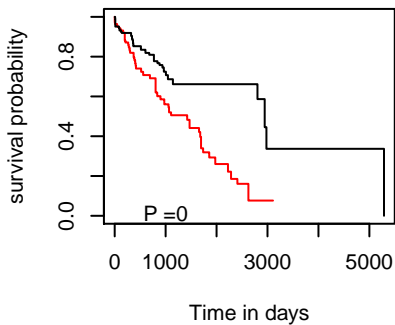**PFI hsa-mir-326**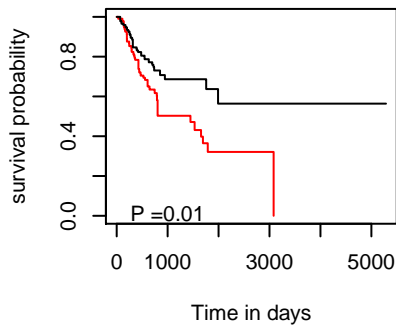**DFI hsa-mir-326**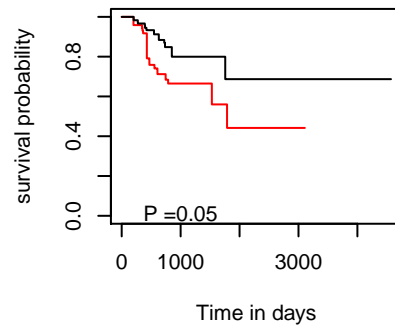**DSS hsa-mir-326**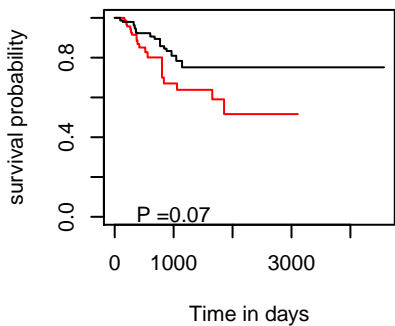**OS hsa-mir-548k**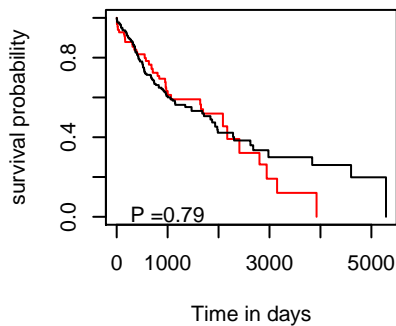**PFI hsa-mir-548k**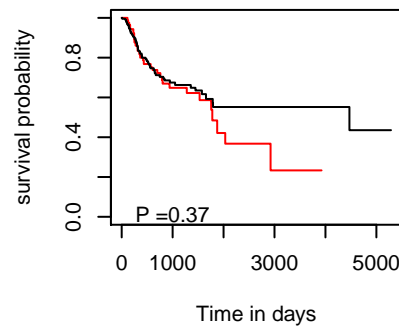**DFI hsa-mir-548k**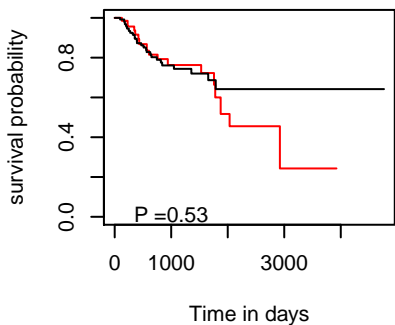**DSS hsa-mir-548k**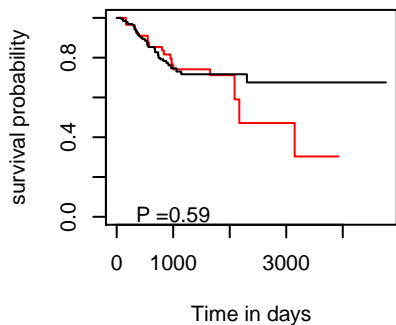**OS hsa-mir-597**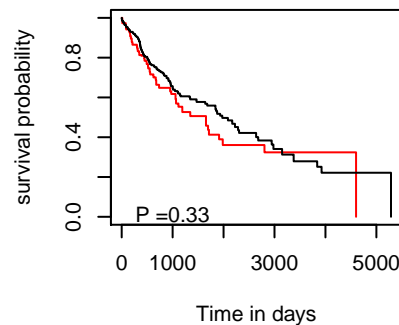

**PFI hsa-mir-597**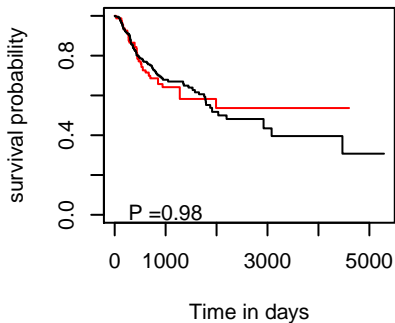**DFI hsa-mir-597**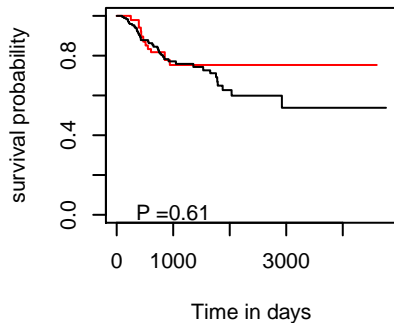**DSS hsa-mir-597**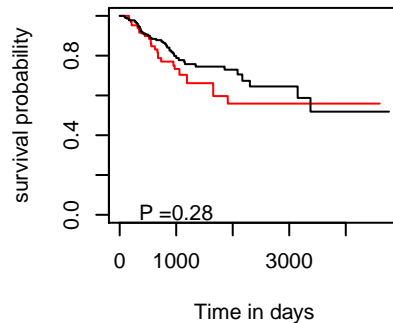**OS hsa-mir-6814**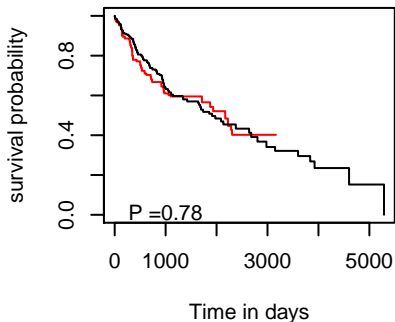**PFI hsa-mir-6814**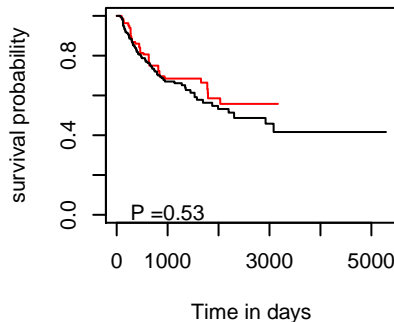**DFI hsa-mir-6814**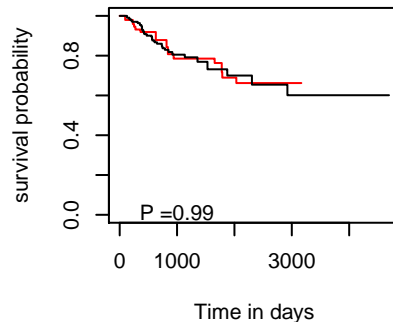**DSS hsa-mir-6814**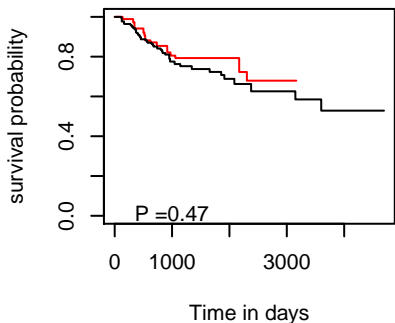**OS hsa-mir-449a**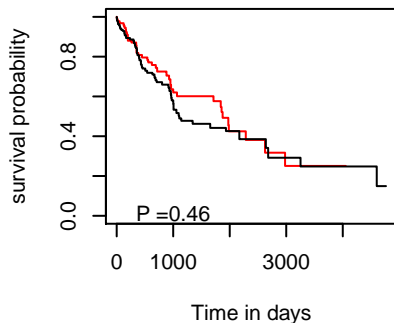**PFI hsa-mir-449a**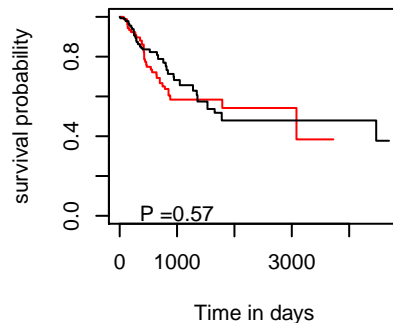

**DFI hsa-mir-449a**

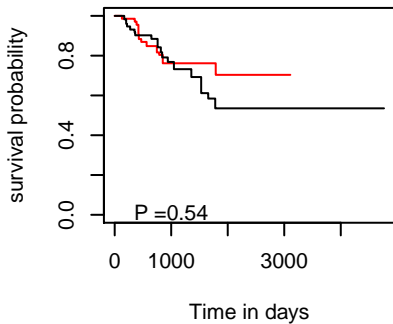

**DSS hsa-mir-449a**

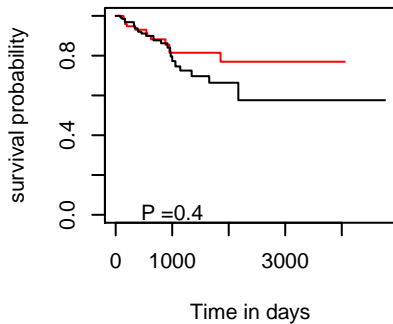

**OS hsa-mir-935**

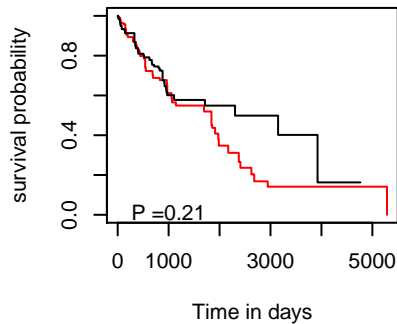

**PFI hsa-mir-935**

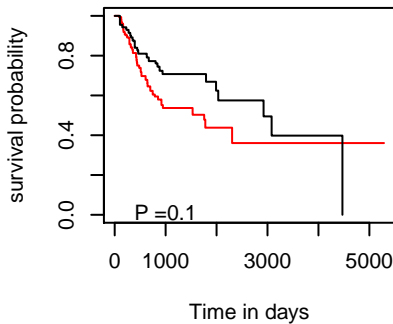

**DFI hsa-mir-935**

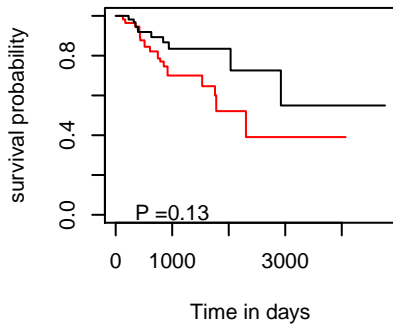

**DSS hsa-mir-935**

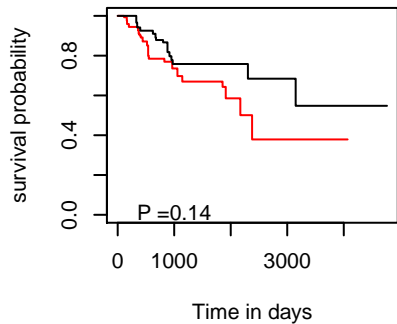

Supplement: MOESM22 [file 41598_2022_7628_MOESM22_ESM.pdf]
