# Supplementary material for: New Thinking on Read-Aloud.
Source: Springer Nature journal article supplement (doi:10.1038/s41598-022-07628-z), 2001-01-01

# Computing microRNA-gene interaction networks in pan-cancer using miRDriver

Banabithi Bose, Matthew Moravec, and Serdar Bozdag

# Supplemental Figure S14

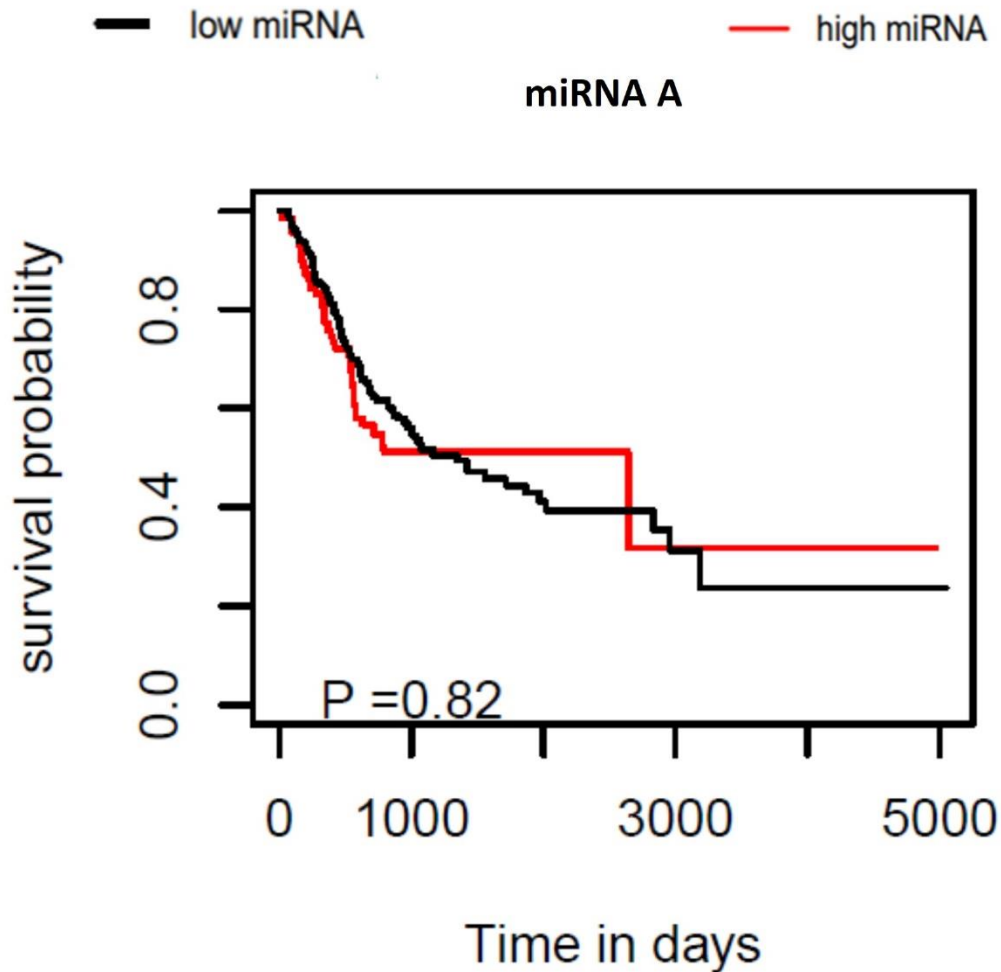

The *Adjusted Kaplan-Meier* survival plots for the computed miRNAs in high and low miRNA expression patient groups.

# Supplemental Figure S14

## Cancer Type: OV

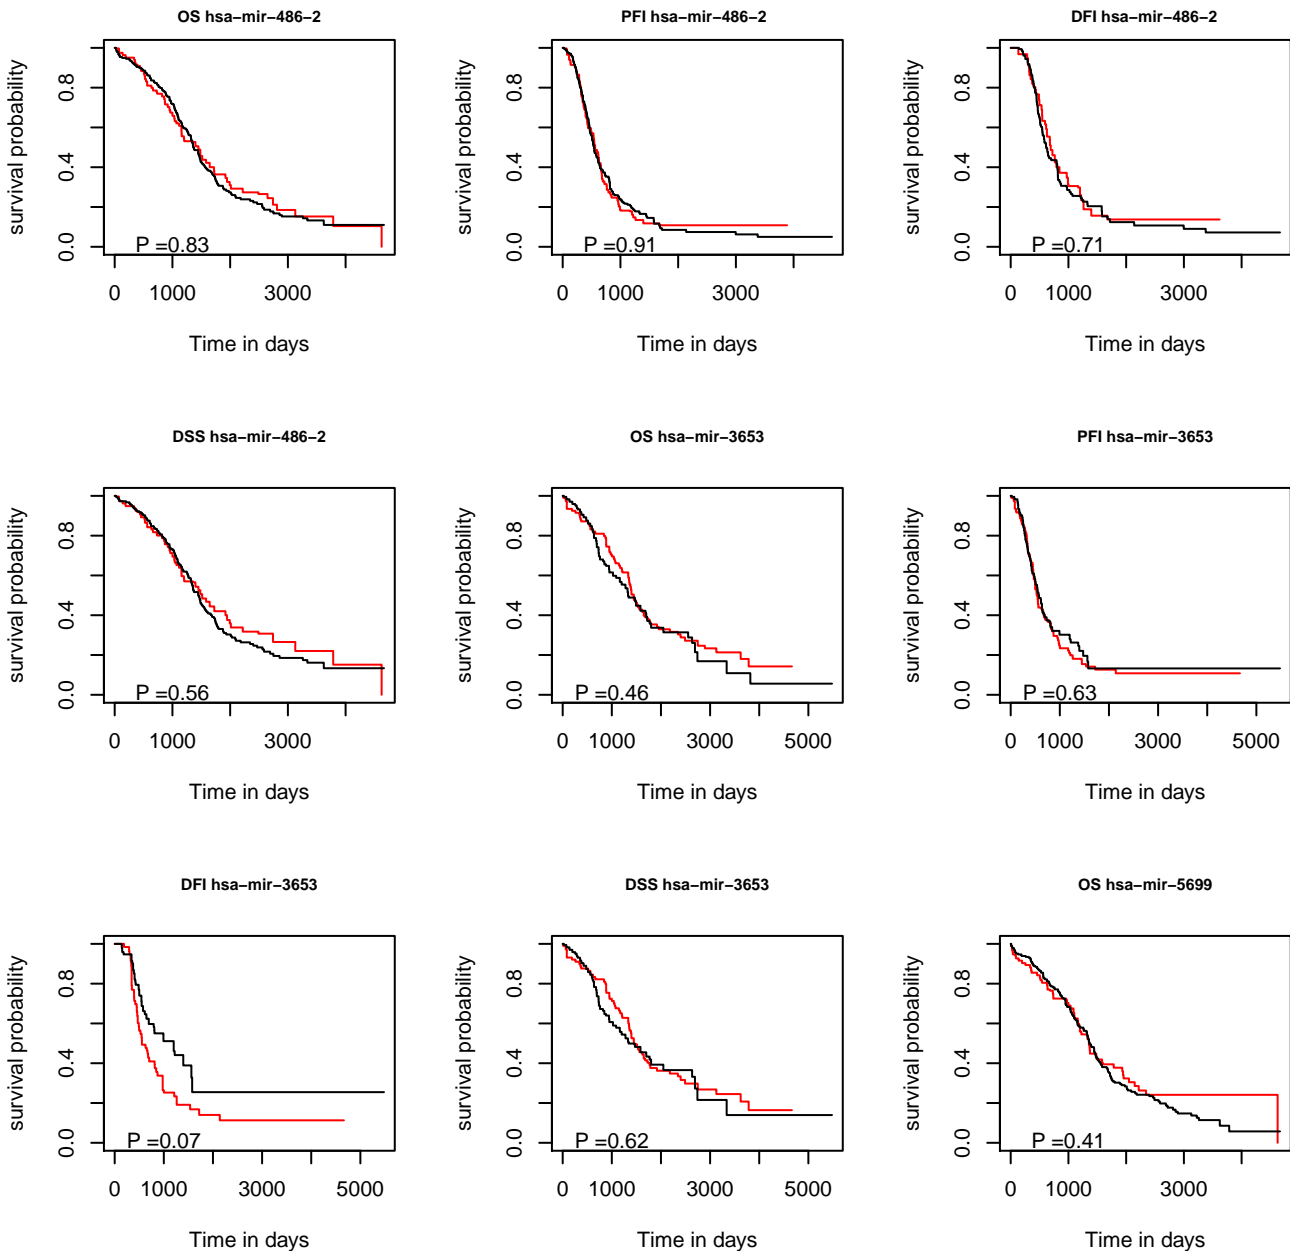

**PFI hsa-mir-5699**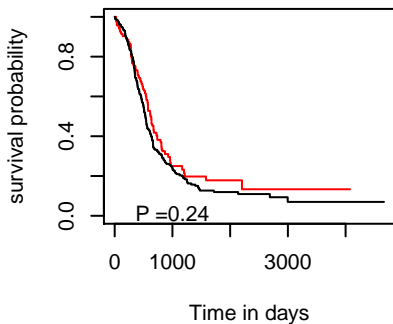**DFI hsa-mir-5699**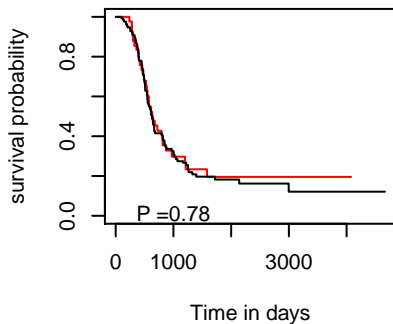**DSS hsa-mir-5699**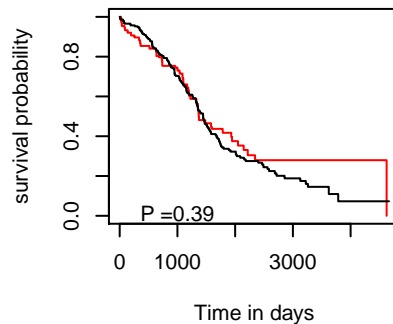**OS hsa-mir-3193**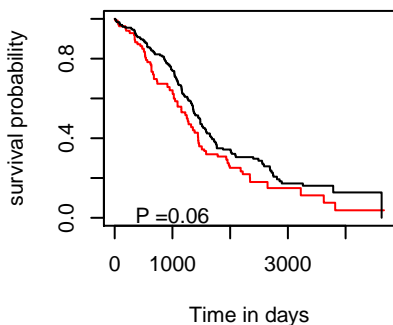**PFI hsa-mir-3193**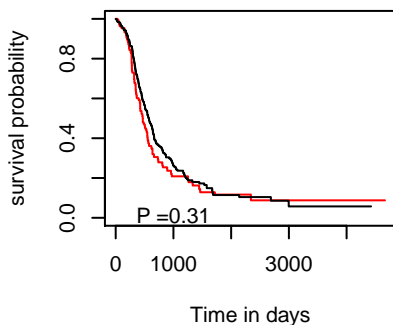**DFI hsa-mir-3193**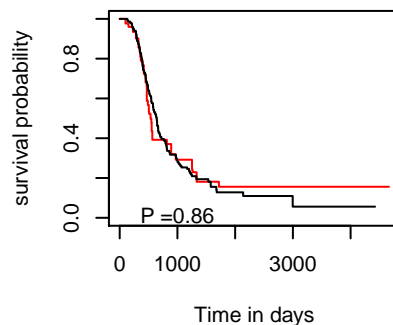**DSS hsa-mir-3193**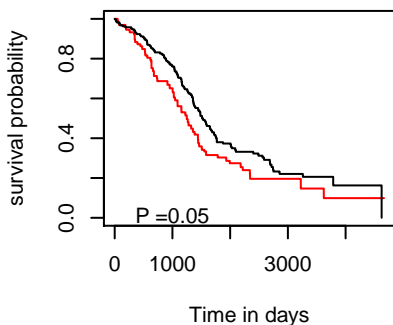**OS hsa-mir-3913-1**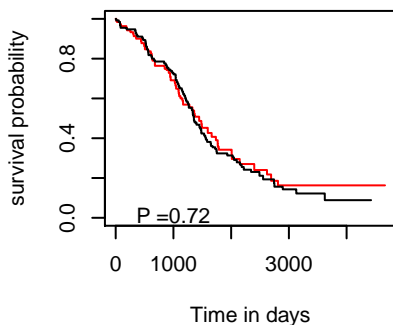**PFI hsa-mir-3913-1**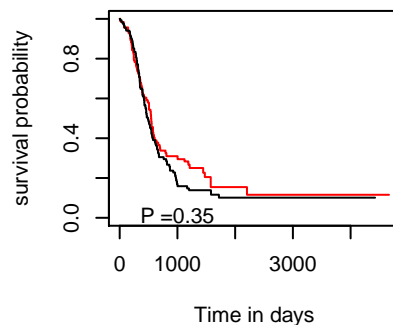

**DFI hsa-mir-3913-1**

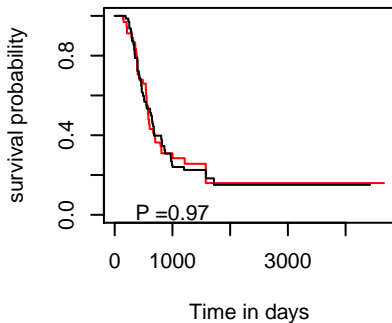

**DSS hsa-mir-3913-1**

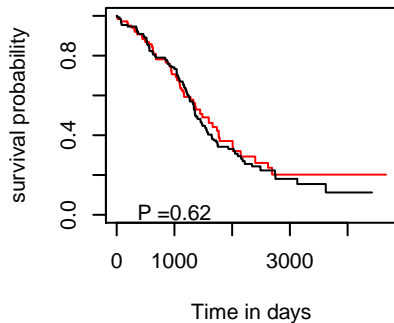

**OS hsa-mir-486**

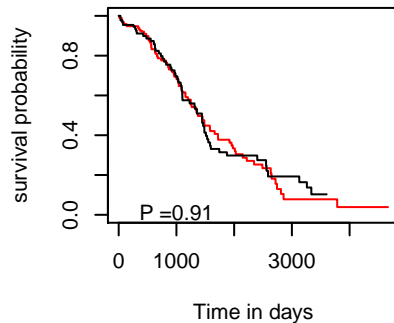

**PFI hsa-mir-486**

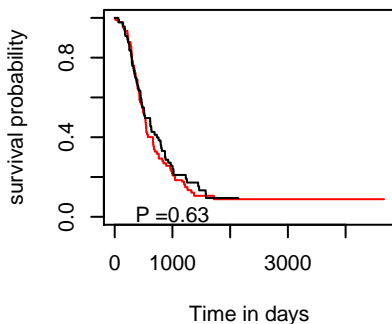

**DFI hsa-mir-486**

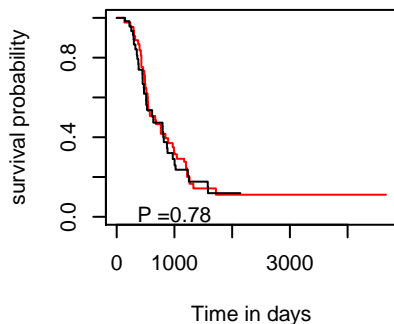

**DSS hsa-mir-486**

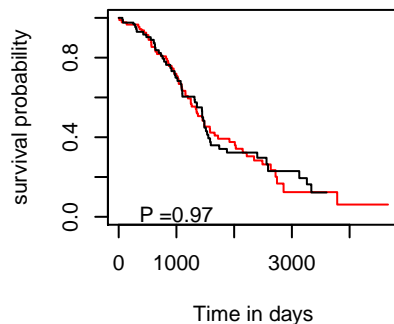

**OS hsa-let-7a-3**

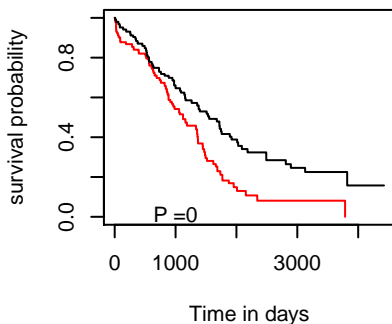

**PFI hsa-let-7a-3**

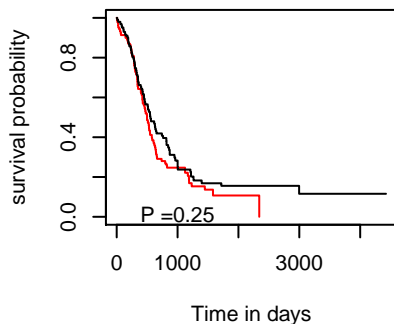

**DFI hsa-let-7a-3**

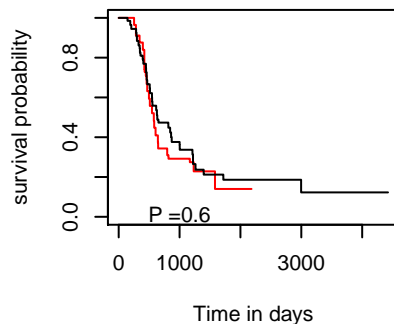

**DSS hsa-let-7a-3**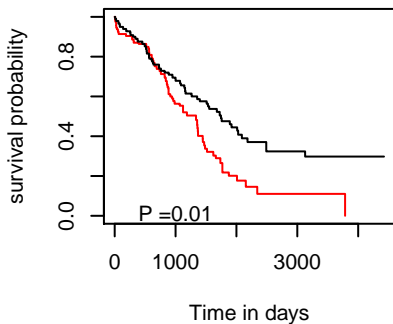**OS hsa-let-7b**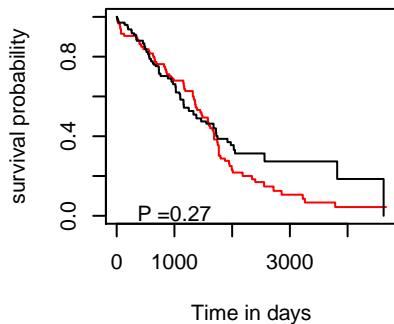**PFI hsa-let-7b**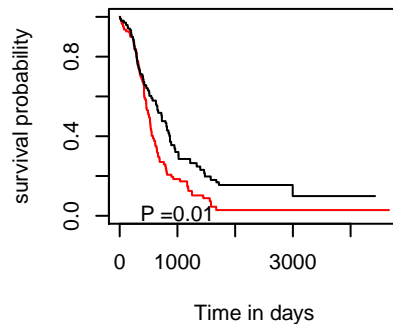**DFI hsa-let-7b**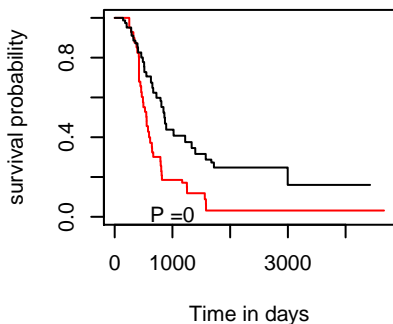**DSS hsa-let-7b**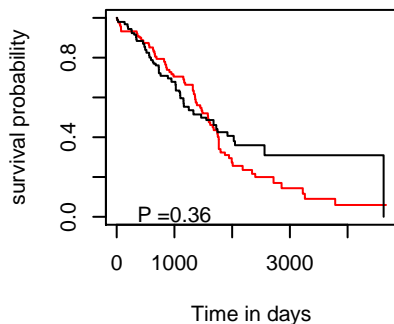**OS hsa-mir-4326**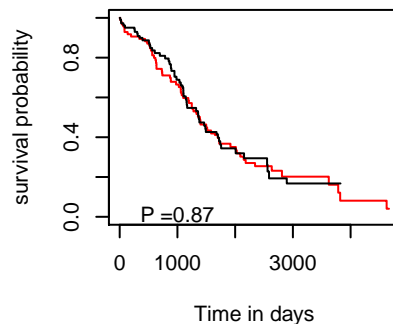**PFI hsa-mir-4326**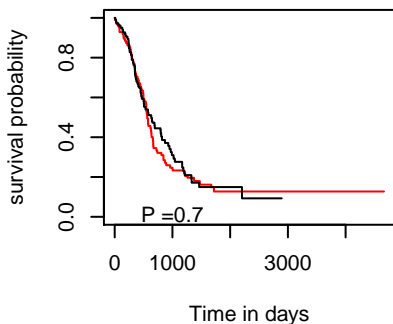**DFI hsa-mir-4326**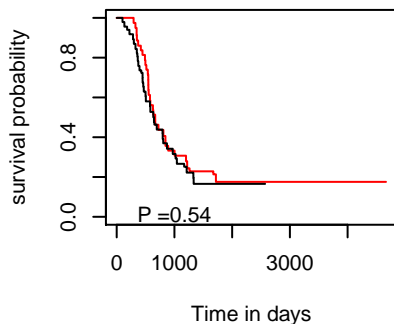**DSS hsa-mir-4326**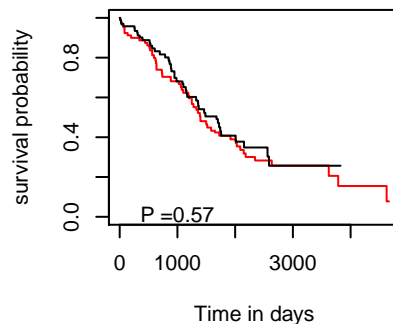

**OS hsa-mir-1914**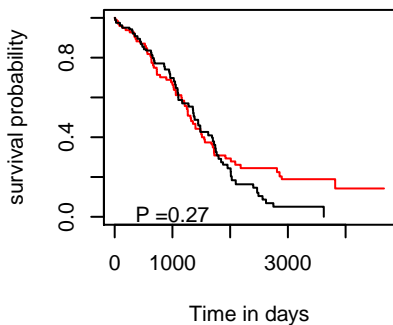**PFI hsa-mir-1914**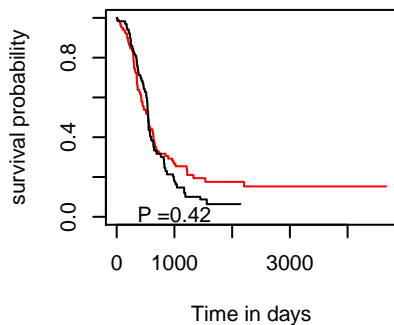**DFI hsa-mir-1914**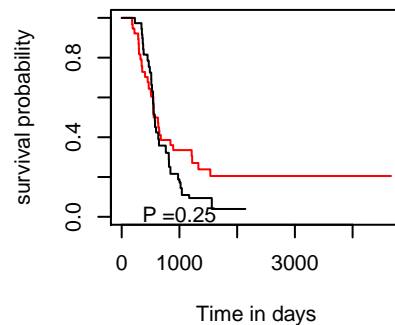**DSS hsa-mir-1914**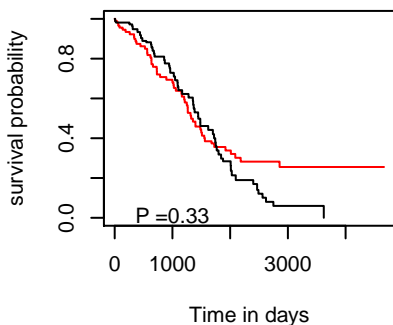**OS hsa-mir-296**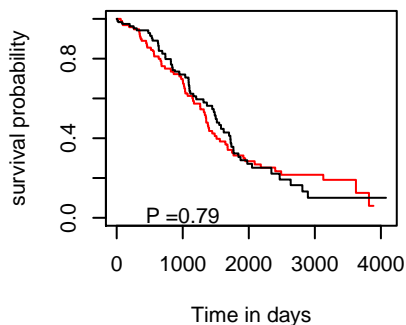**PFI hsa-mir-296**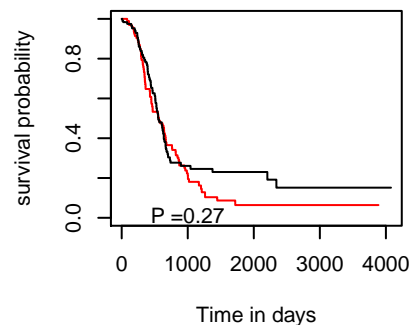**DFI hsa-mir-296**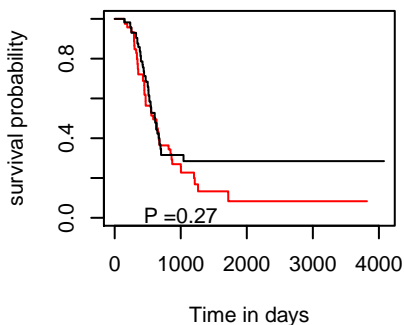**DSS hsa-mir-296**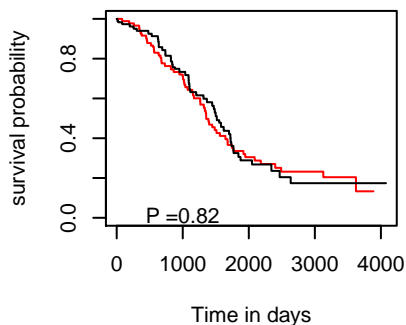**OS hsa-mir-4758**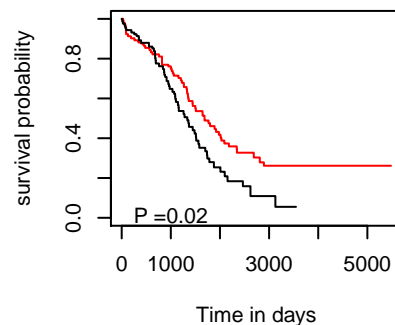

**PFI hsa-mir-4758**

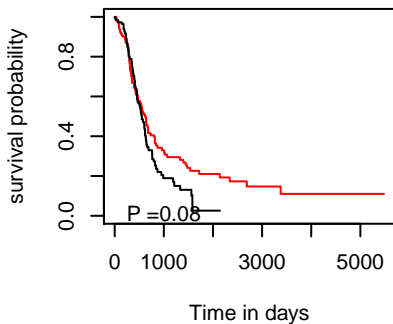

**DFI hsa-mir-4758**

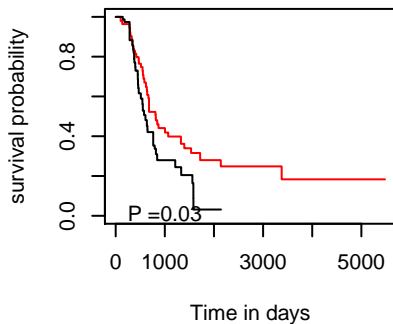

**DSS hsa-mir-4758**

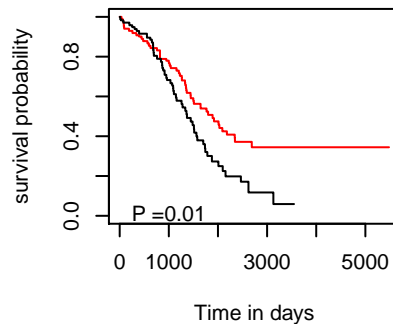

**OS hsa-mir-6813**

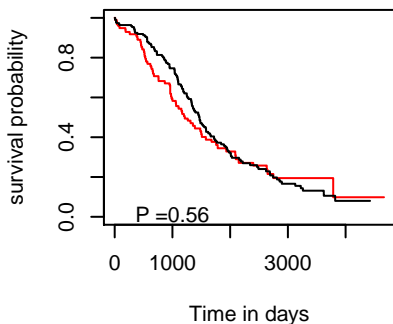

**PFI hsa-mir-6813**

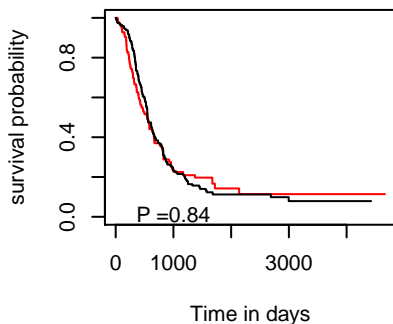

**DFI hsa-mir-6813**

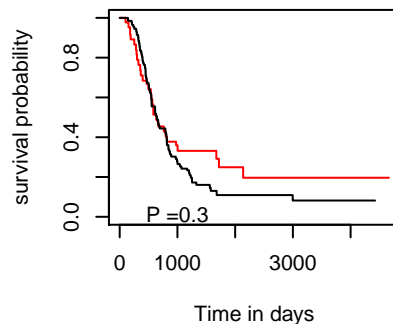

**DSS hsa-mir-6813**

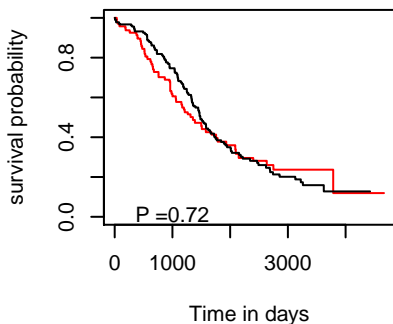

**OS hsa-mir-1249**

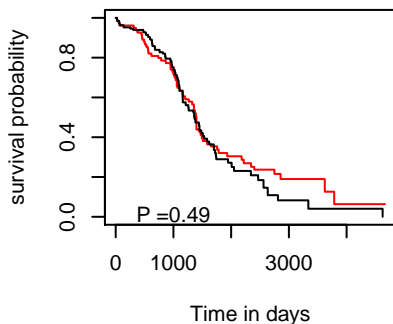

**PFI hsa-mir-1249**

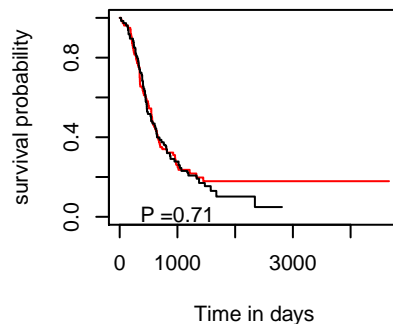

**DFI hsa-mir-1249**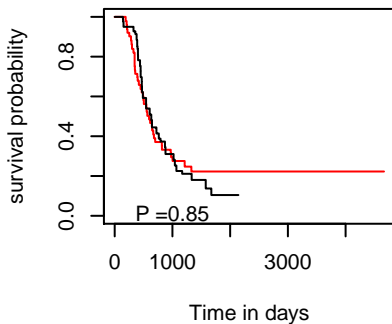**DSS hsa-mir-1249**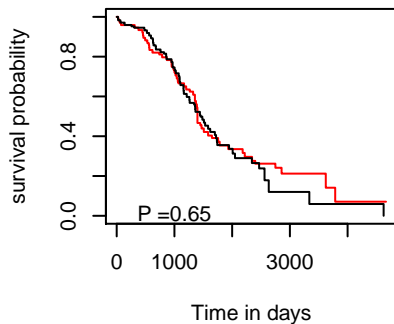**OS hsa-mir-4697**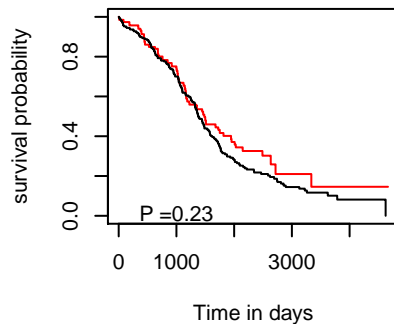**PFI hsa-mir-4697**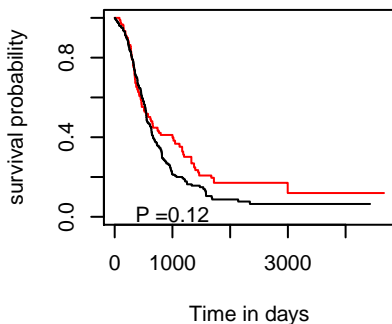**DFI hsa-mir-4697**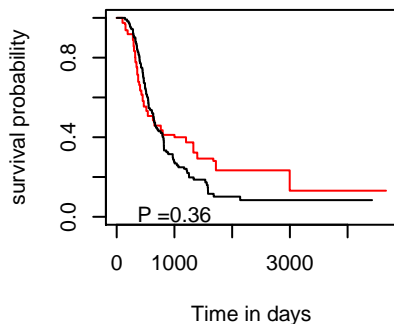**DSS hsa-mir-4697**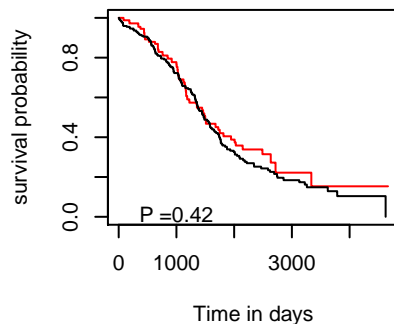**OS hsa-mir-6821**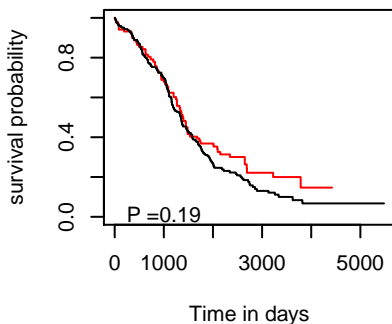**PFI hsa-mir-6821**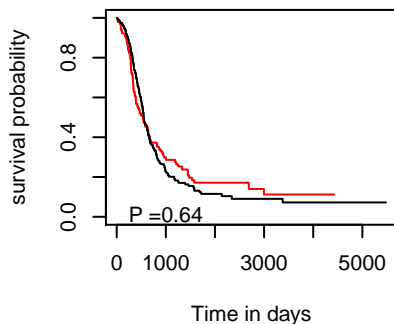**DFI hsa-mir-6821**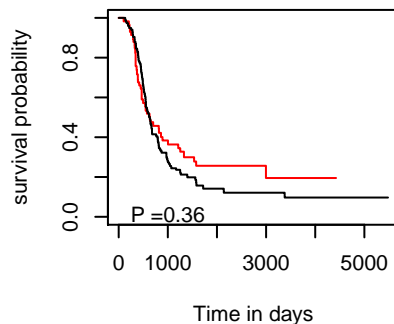

**DSS hsa-mir-6821**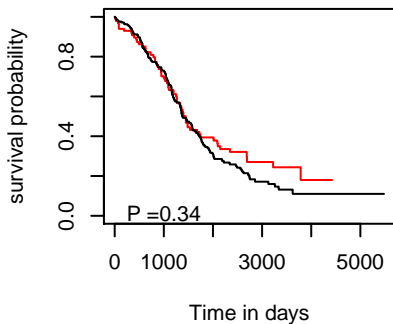**OS hsa-mir-33a**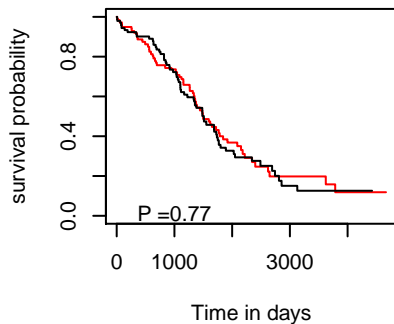**PFI hsa-mir-33a**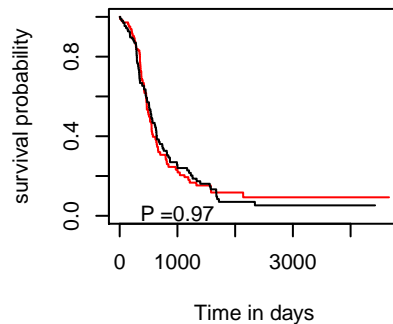**DFI hsa-mir-33a**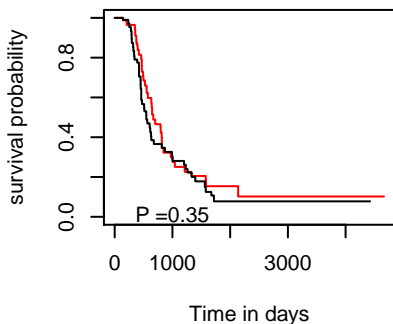**DSS hsa-mir-33a**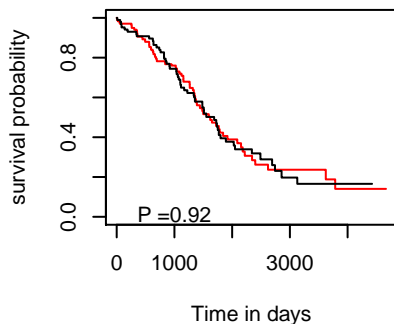**OS hsa-mir-338**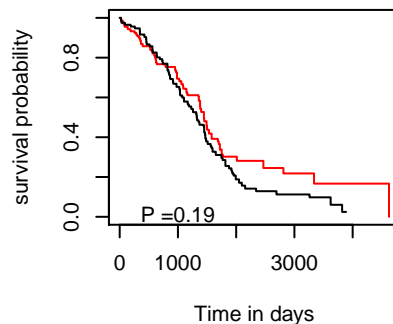**PFI hsa-mir-338**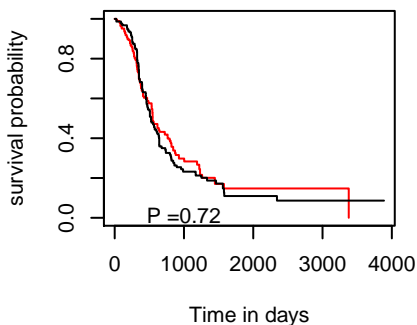**DFI hsa-mir-338**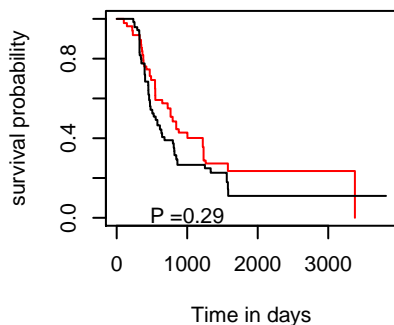**DSS hsa-mir-338**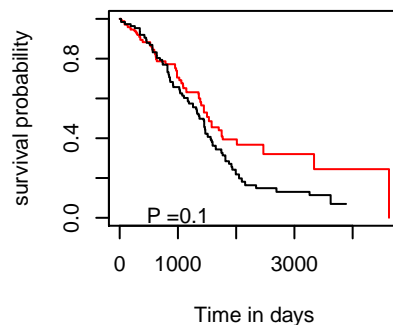

**OS hsa-mir-3687**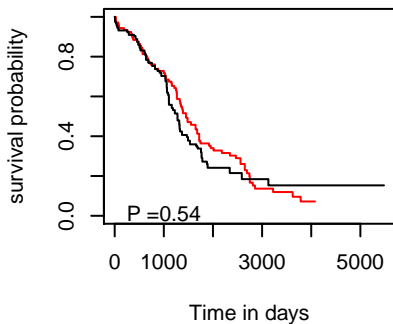**PFI hsa-mir-3687**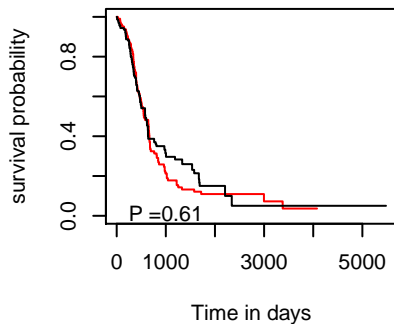**DFI hsa-mir-3687**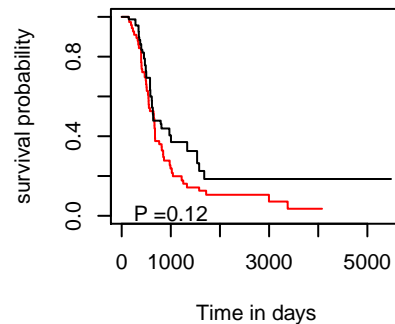**DSS hsa-mir-3687**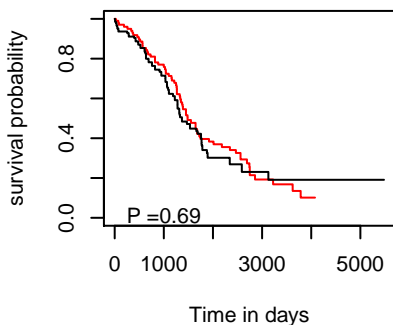**OS hsa-mir-4533**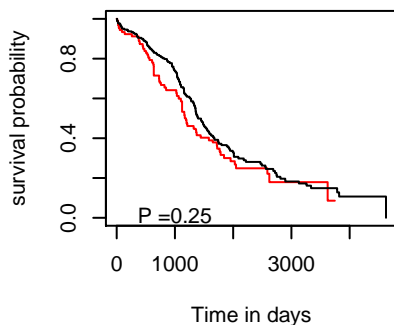**PFI hsa-mir-4533**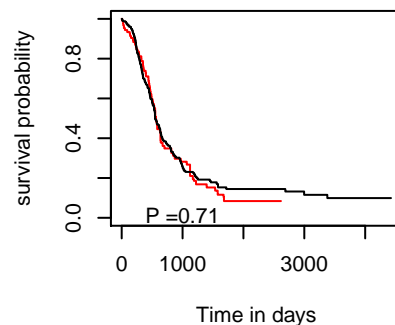**DFI hsa-mir-4533**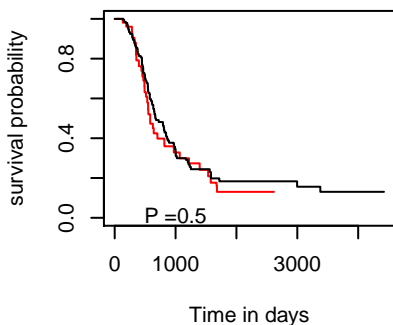**DSS hsa-mir-4533**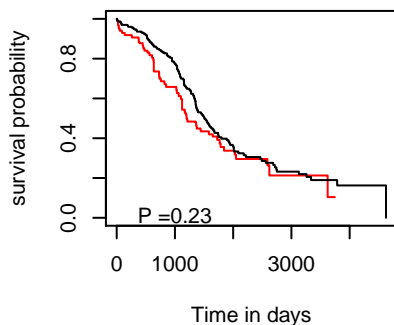**OS hsa-mir-4726**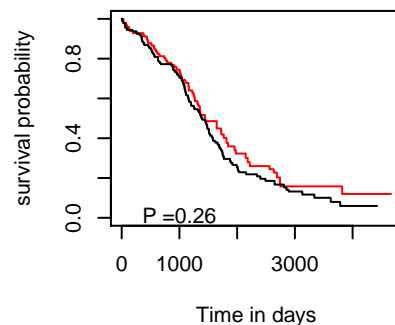

**PFI hsa-mir-4726**

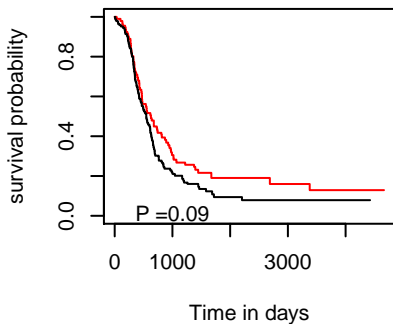

**DFI hsa-mir-4726**

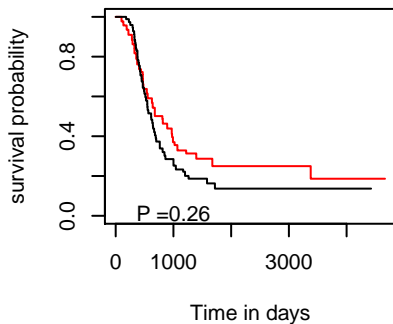

**DSS hsa-mir-4726**

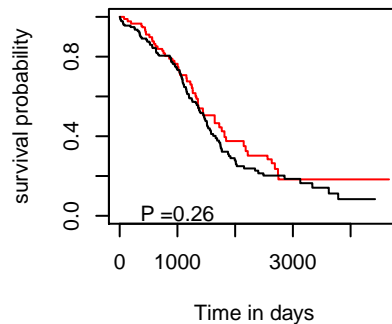

**OS hsa-mir-4727**

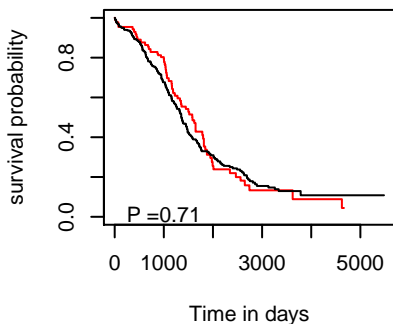

**PFI hsa-mir-4727**

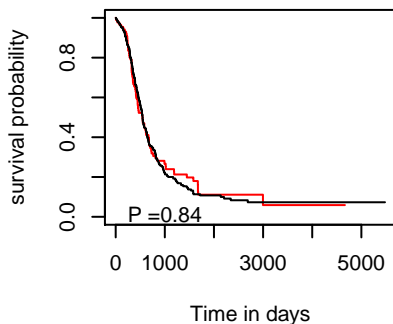

**DFI hsa-mir-4727**

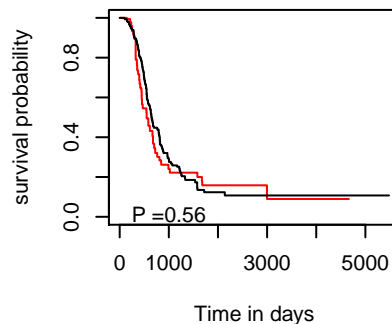

**DSS hsa-mir-4727**

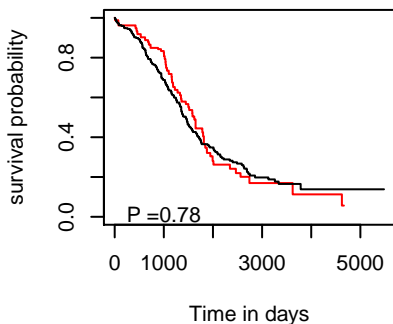

**OS hsa-mir-4728**

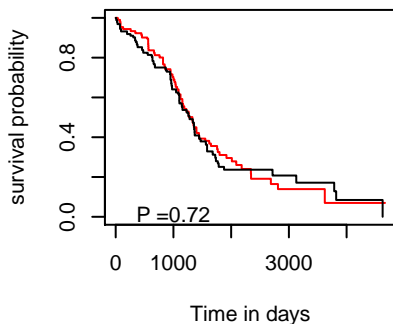

**PFI hsa-mir-4728**

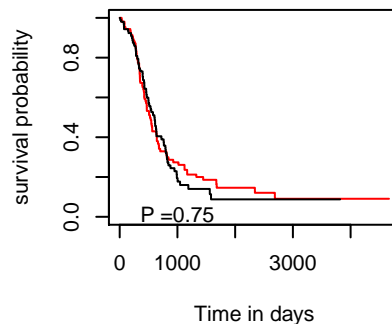

**DFI hsa-mir-4728**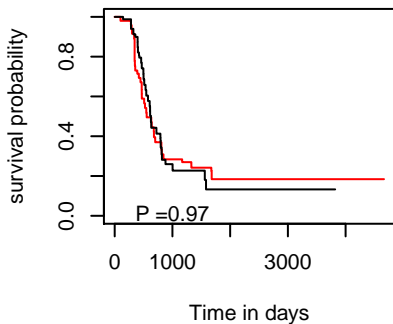**DSS hsa-mir-4728**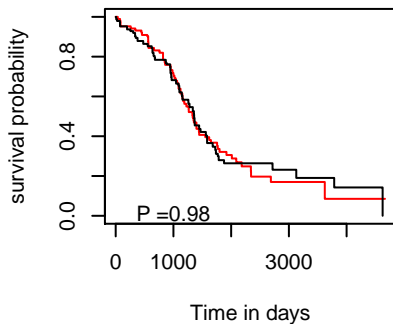**OS hsa-mir-6779**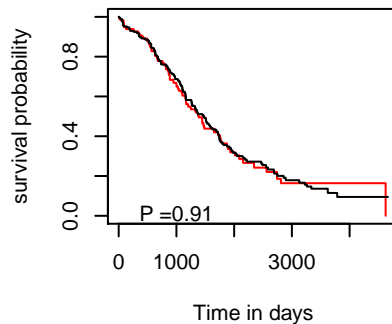**PFI hsa-mir-6779**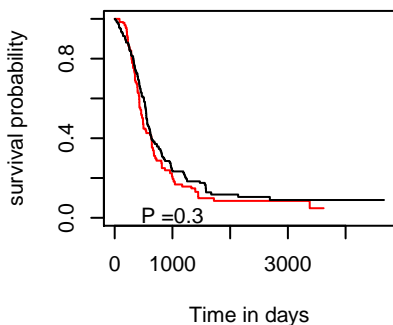**DFI hsa-mir-6779**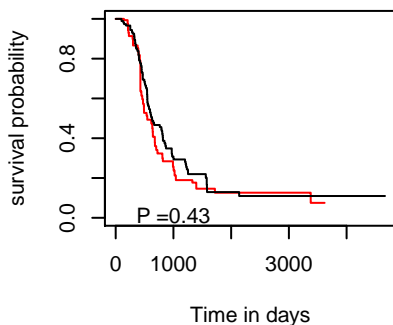**DSS hsa-mir-6779**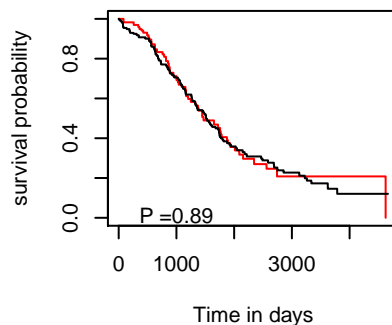**OS hsa-mir-6814**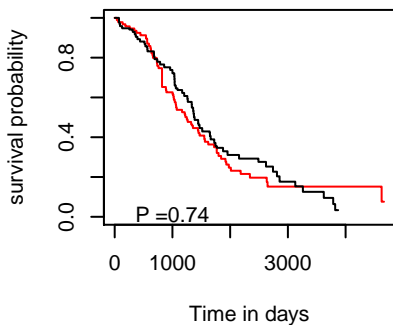**PFI hsa-mir-6814**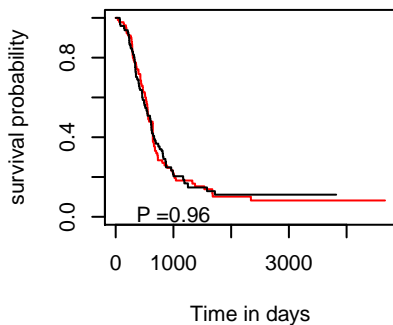**DFI hsa-mir-6814**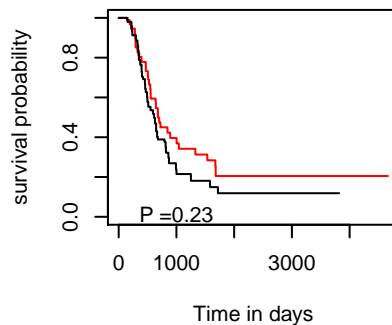



**OS hsa-mir-4745**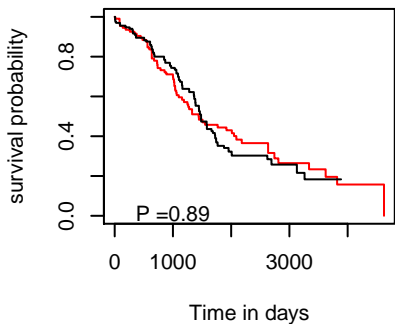**PFI hsa-mir-4745**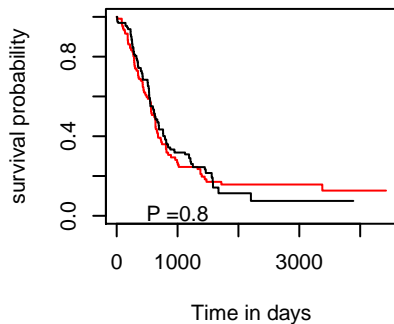**DFI hsa-mir-4745**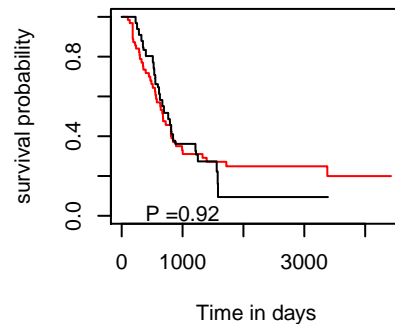**DSS hsa-mir-4745**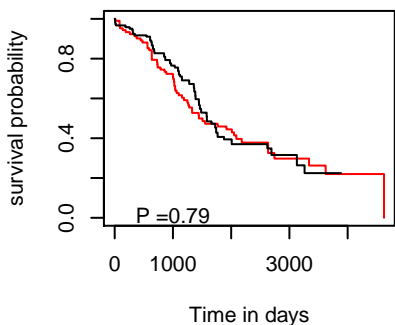**OS hsa-mir-4746**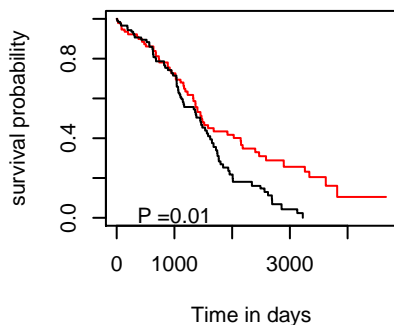**PFI hsa-mir-4746**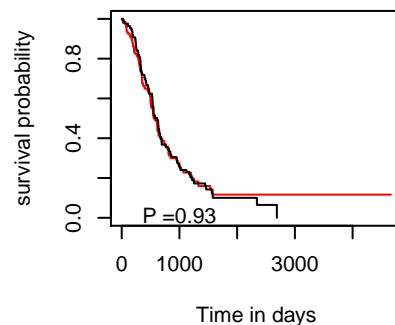**DFI hsa-mir-4746**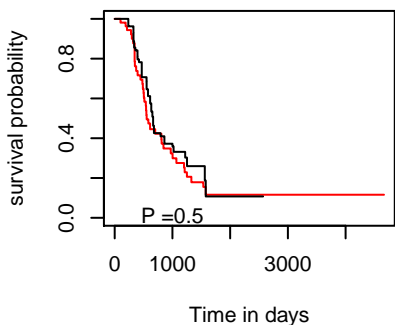**DSS hsa-mir-4746**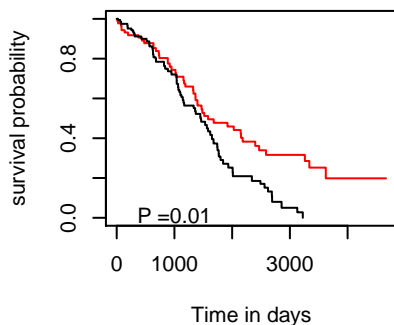**OS hsa-mir-639**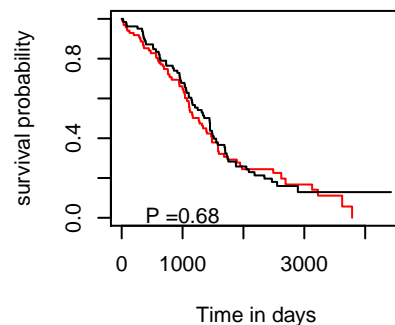



**DFI hsa-mir-6794**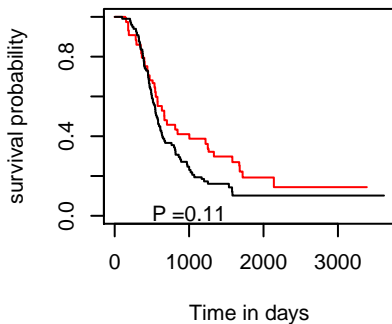**DSS hsa-mir-6794**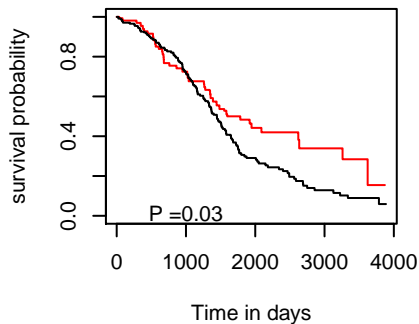**OS hsa-mir-6886**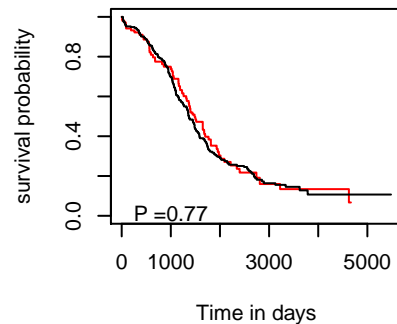**PFI hsa-mir-6886**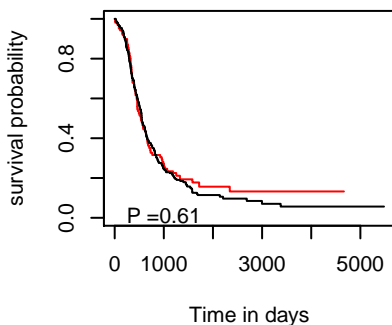**DFI hsa-mir-6886**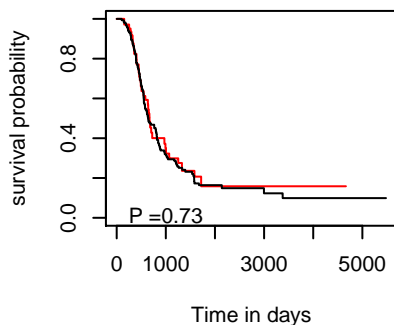**DSS hsa-mir-6886**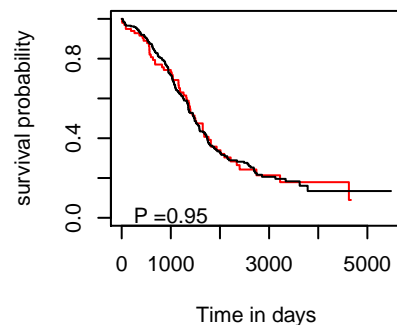**OS hsa-mir-7974**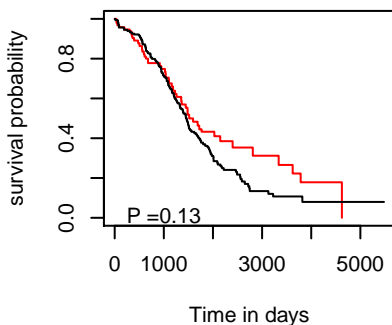**PFI hsa-mir-7974**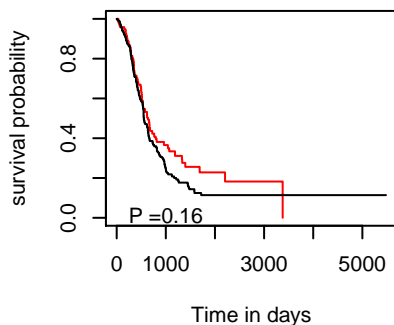**DFI hsa-mir-7974**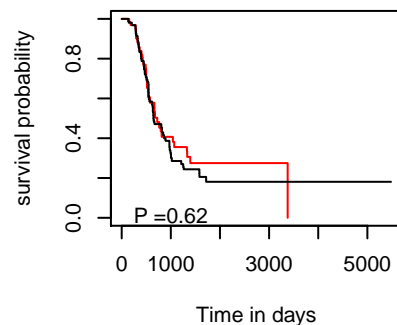

**DSS hsa-mir-7974**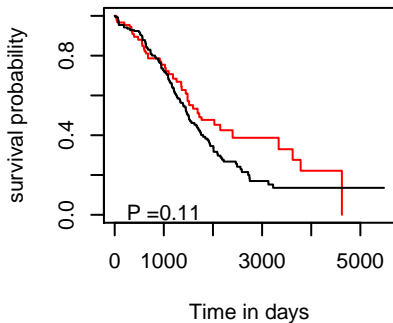**OS hsa-mir-3197**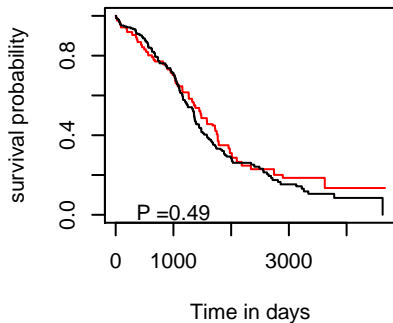**PFI hsa-mir-3197**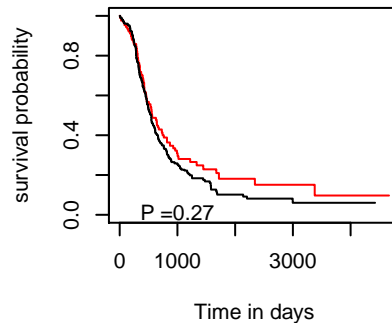**DFI hsa-mir-3197**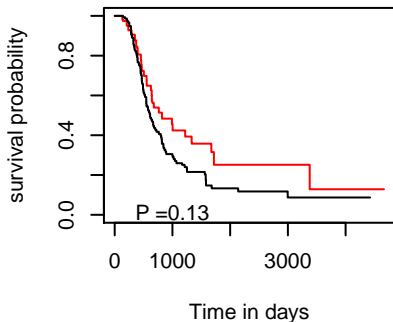**DSS hsa-mir-3197**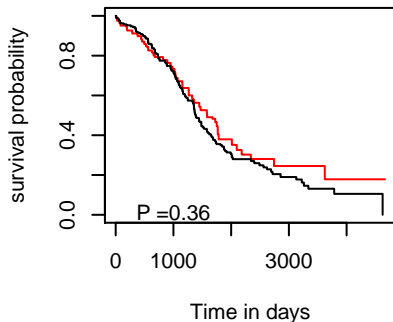**OS hsa-mir-3619**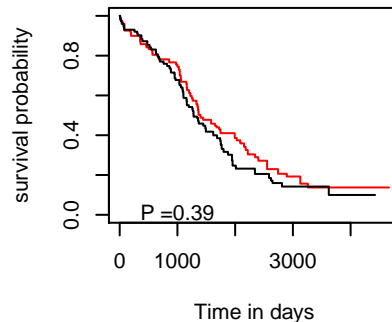**PFI hsa-mir-3619**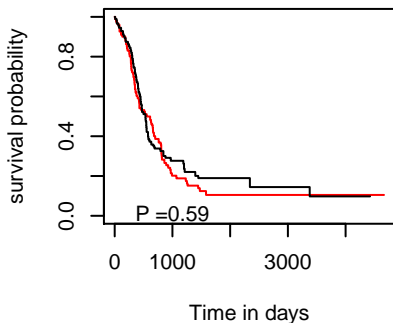**DFI hsa-mir-3619**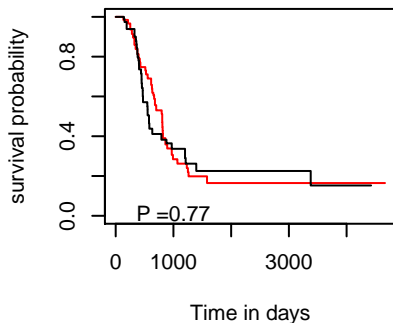**DSS hsa-mir-3619**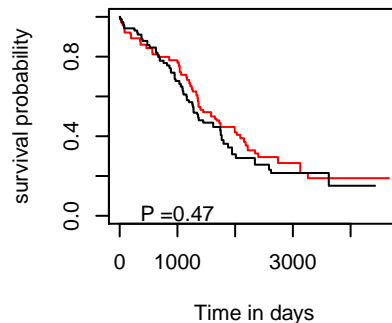

**OS hsa-mir-1250**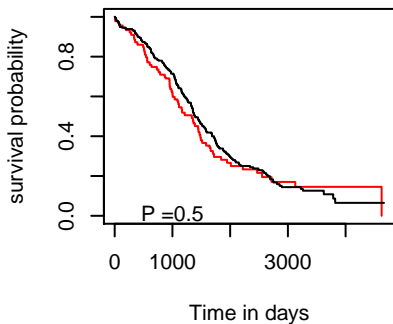**PFI hsa-mir-1250**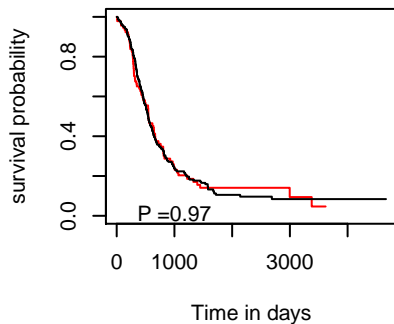**DFI hsa-mir-1250**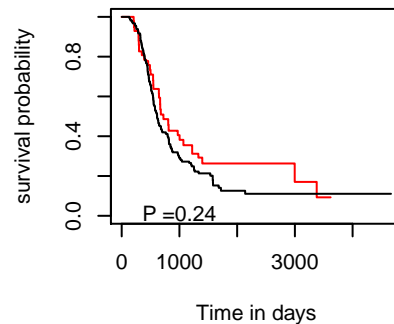**DSS hsa-mir-1250**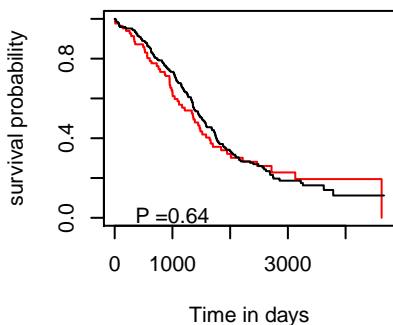**OS hsa-mir-3065**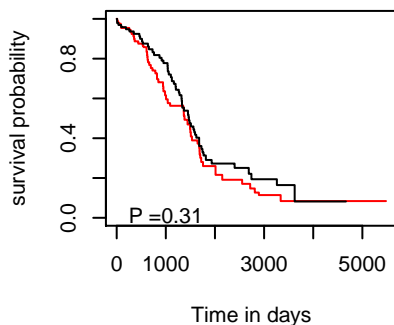**PFI hsa-mir-3065**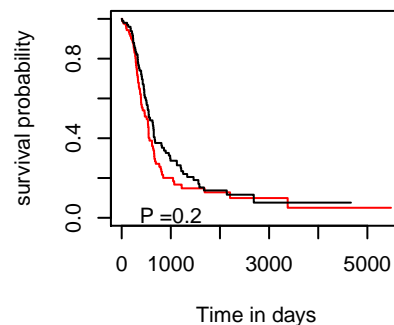**DFI hsa-mir-3065**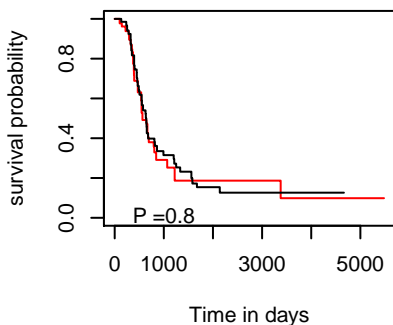**DSS hsa-mir-3065**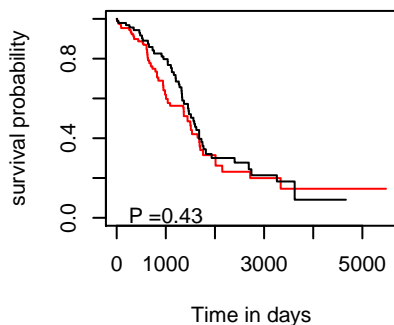**OS hsa-mir-4525**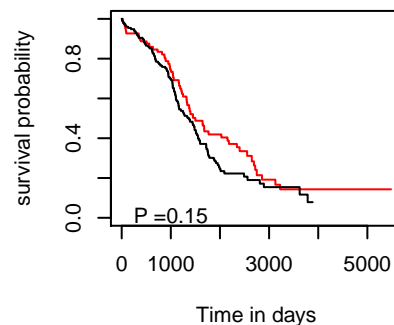

**PFI hsa-mir-4525**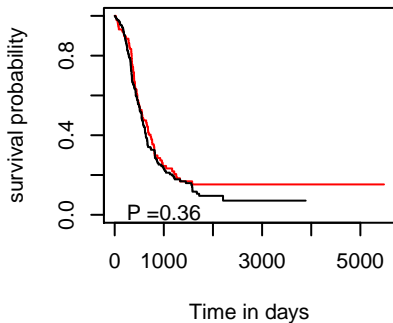**DFI hsa-mir-4525**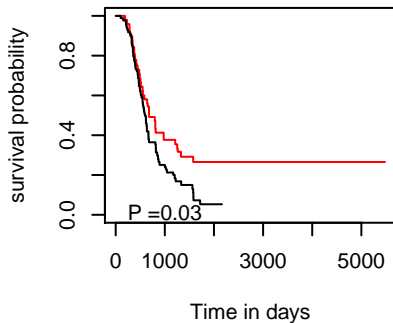**DSS hsa-mir-4525**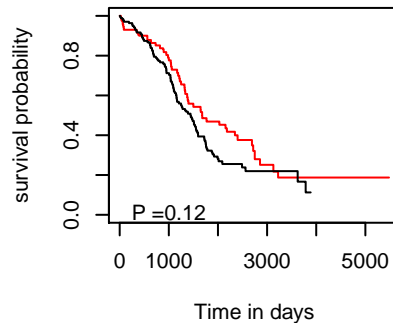**OS hsa-mir-181c**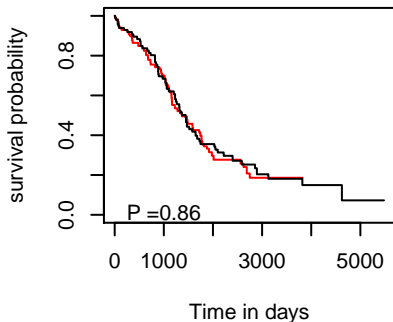**PFI hsa-mir-181c**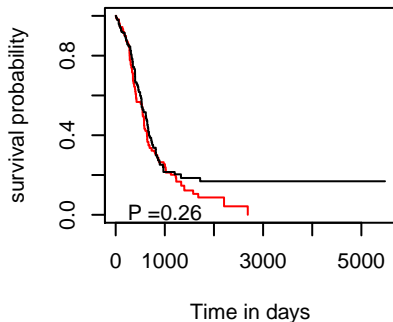**DFI hsa-mir-181c**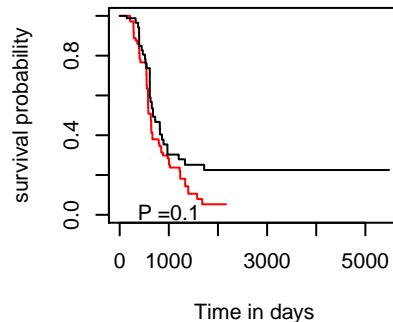**DSS hsa-mir-181c**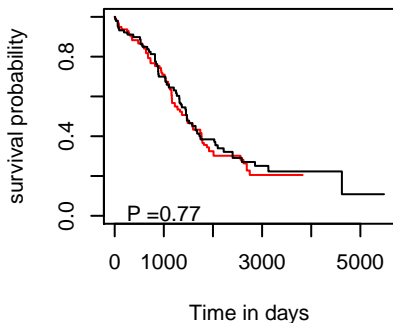**OS hsa-mir-4999**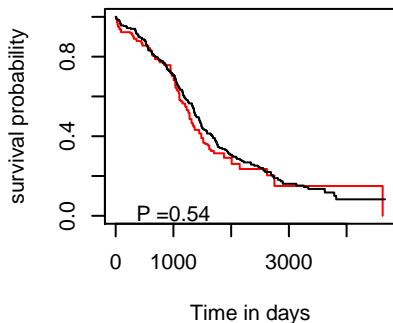**PFI hsa-mir-4999**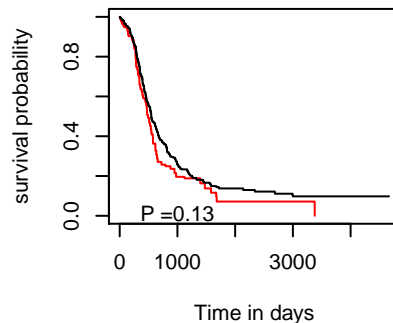

**DFI hsa-mir-4999**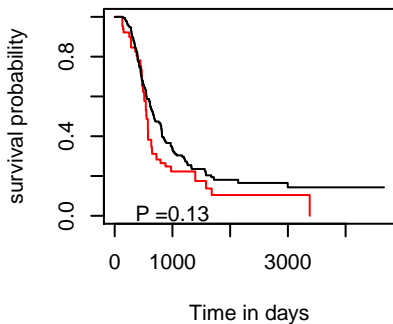**DSS hsa-mir-4999**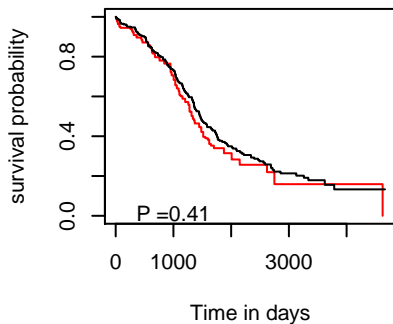**OS hsa-mir-4734**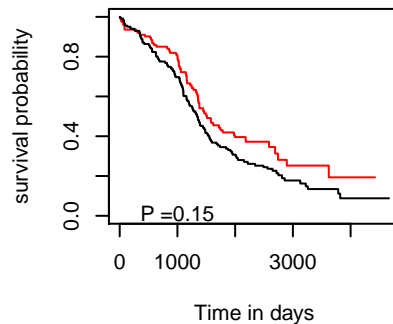**PFI hsa-mir-4734**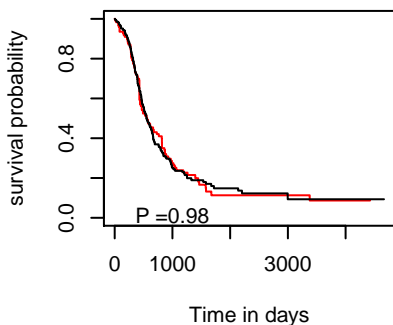**DFI hsa-mir-4734**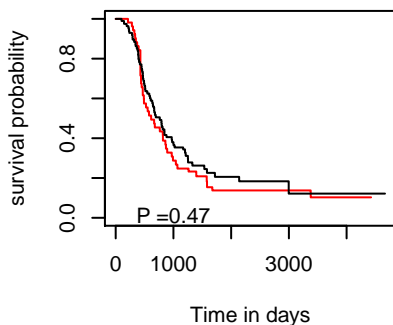**DSS hsa-mir-4734**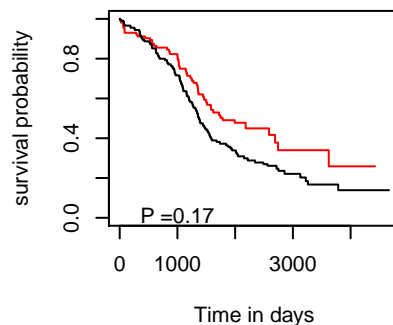**OS hsa-mir-6884**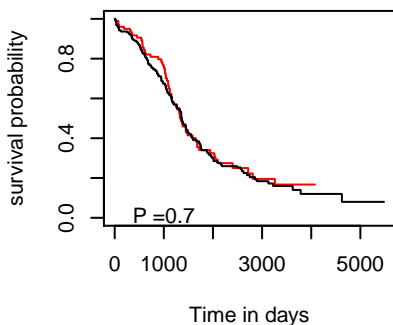**PFI hsa-mir-6884**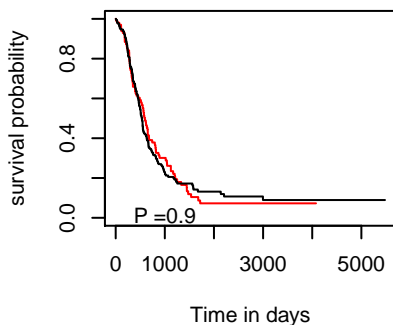**DFI hsa-mir-6884**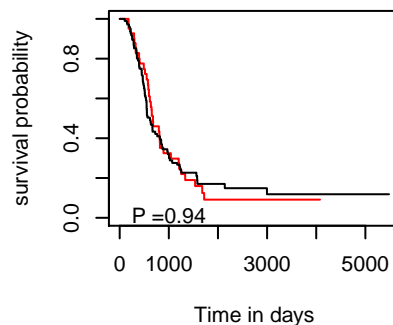

**DSS hsa-mir-6884**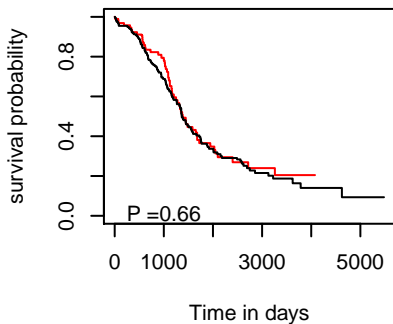**OS hsa-mir-6795**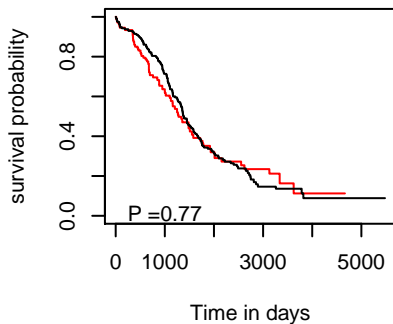**PFI hsa-mir-6795**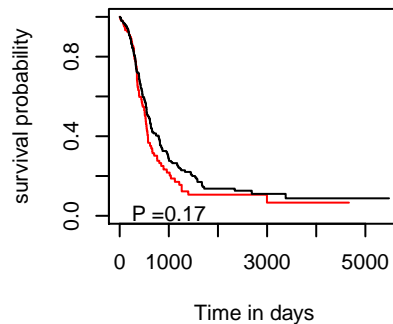**DFI hsa-mir-6795**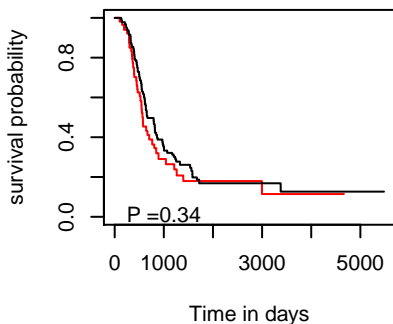**DSS hsa-mir-6795**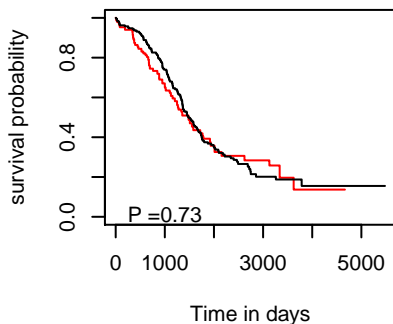**OS hsa-mir-181d**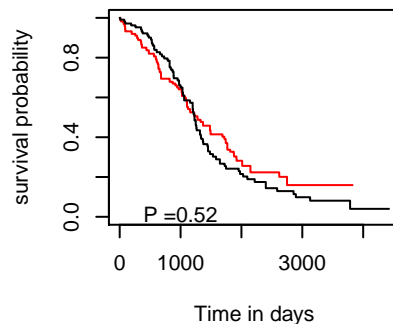**PFI hsa-mir-181d**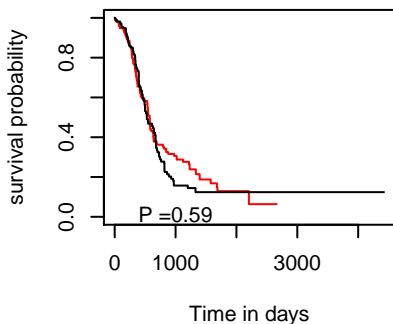**DFI hsa-mir-181d**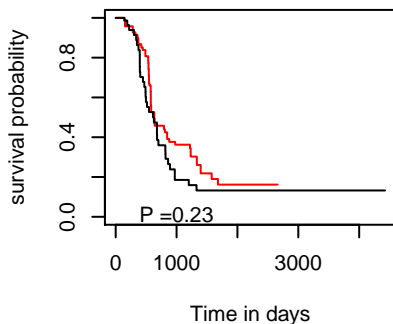**DSS hsa-mir-181d**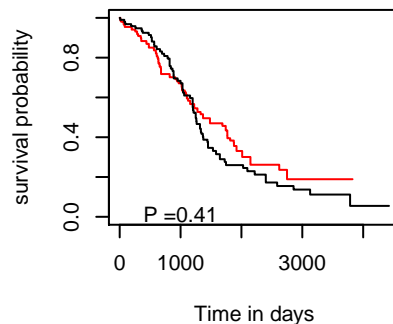

**OS hsa-mir-23a**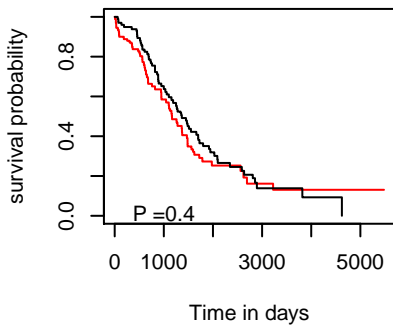**PFI hsa-mir-23a**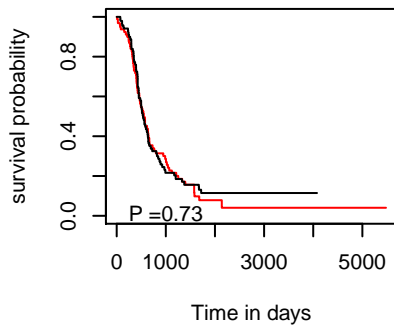**DFI hsa-mir-23a**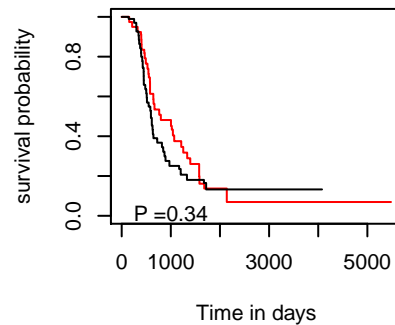**DSS hsa-mir-23a**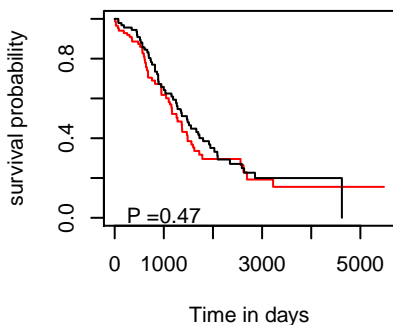**OS hsa-mir-27a**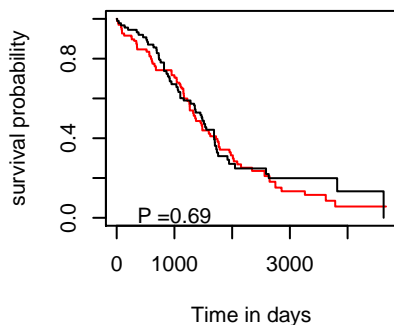**PFI hsa-mir-27a**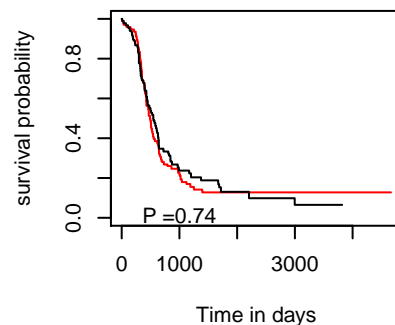**DFI hsa-mir-27a**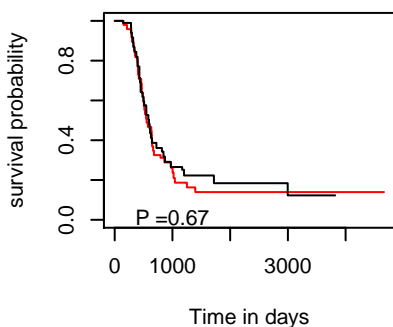**DSS hsa-mir-27a**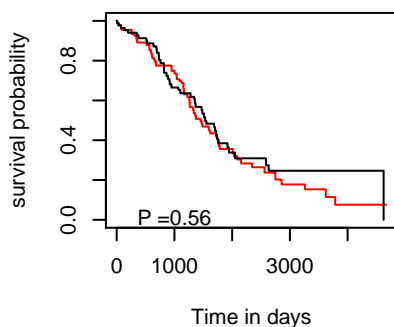**OS hsa-mir-378i**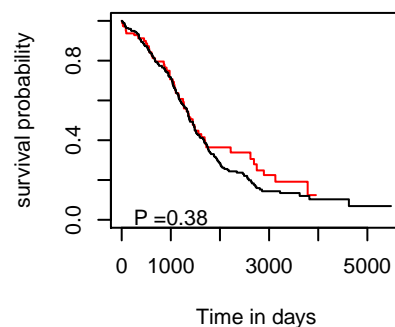

**PFI hsa-mir-378i**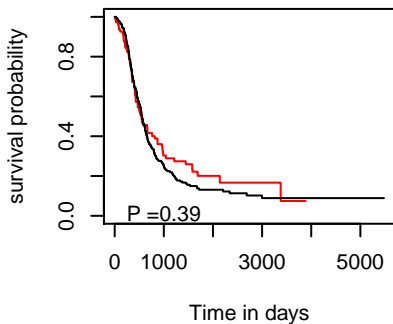**DFI hsa-mir-378i**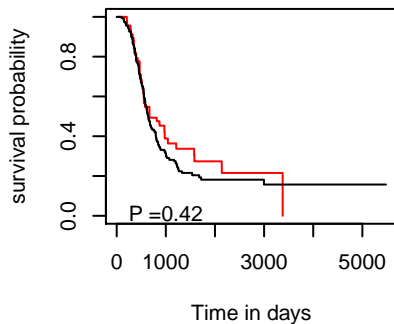**DSS hsa-mir-378i**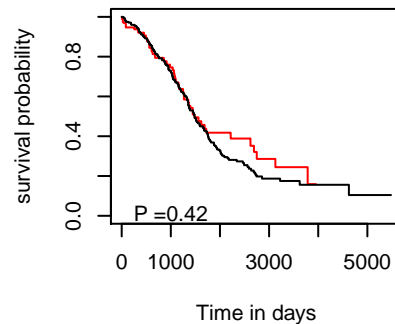**OS hsa-mir-6786**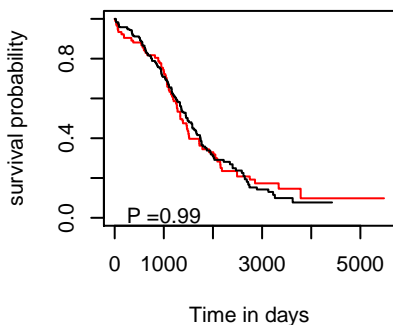**PFI hsa-mir-6786**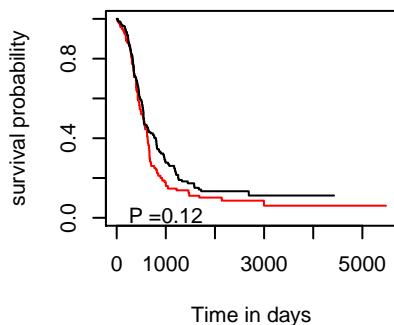**DFI hsa-mir-6786**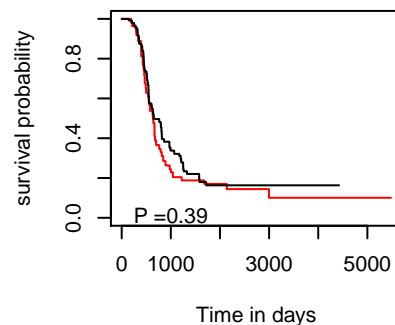**DSS hsa-mir-6786**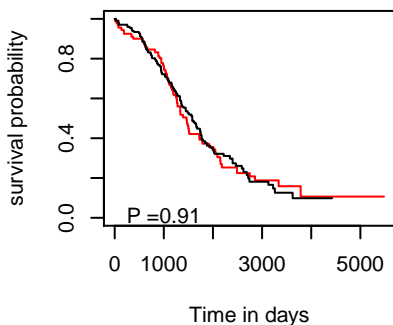**OS hsa-mir-4532**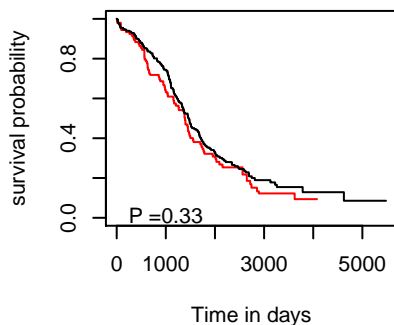**PFI hsa-mir-4532**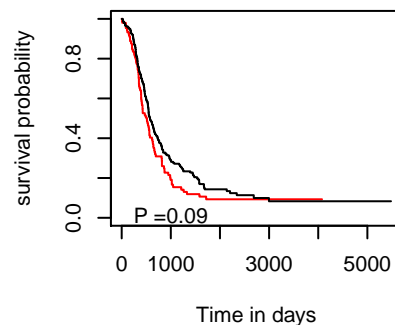

**DFI hsa-mir-4532**

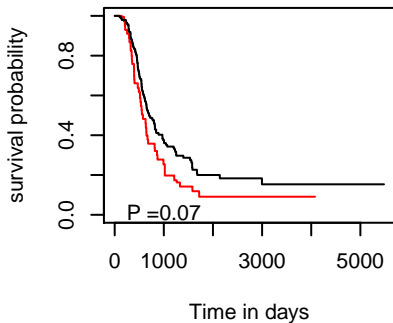

**DSS hsa-mir-4532**

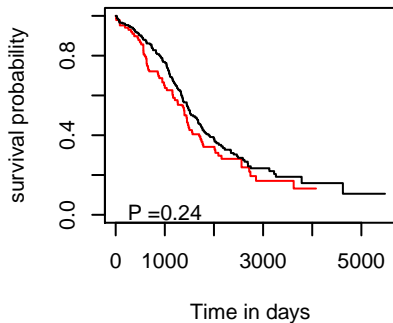

**OS hsa-mir-4763**

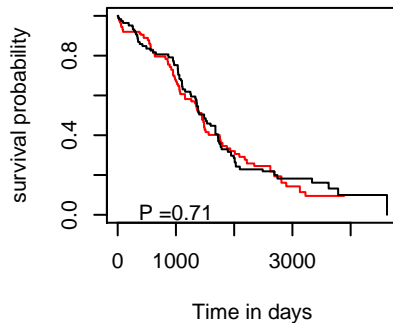

**PFI hsa-mir-4763**

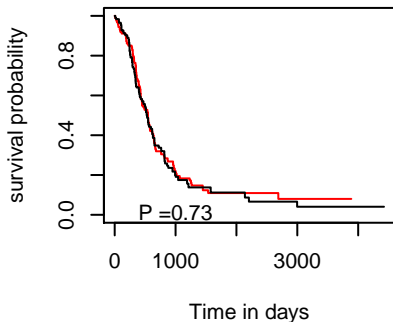

**DFI hsa-mir-4763**

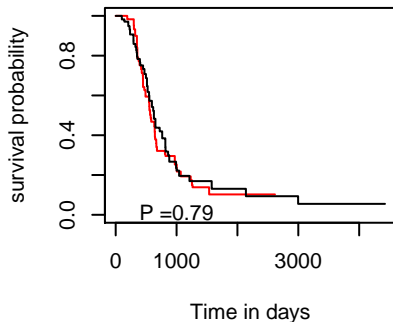

**DSS hsa-mir-4763**

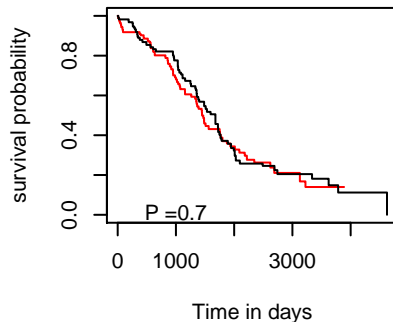

**OS hsa-mir-1227**

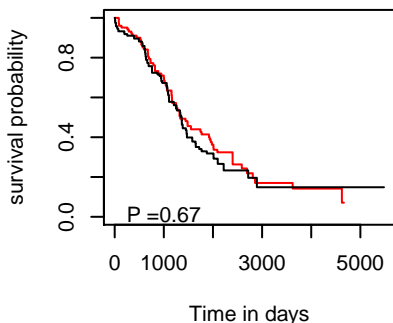

**PFI hsa-mir-1227**

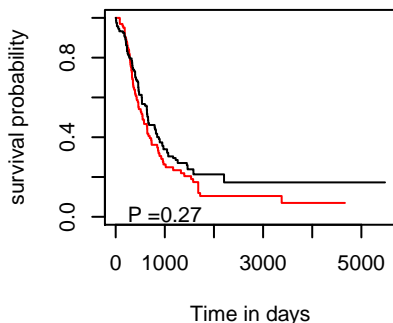

**DFI hsa-mir-1227**

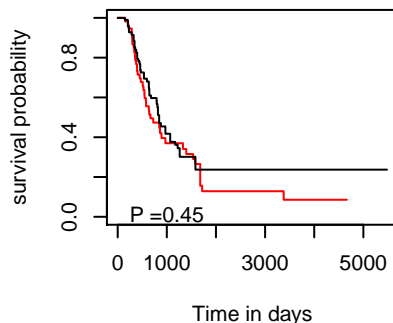

**DSS hsa-mir-1227**

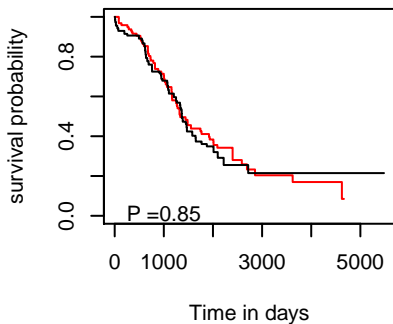

**OS hsa-mir-3188**

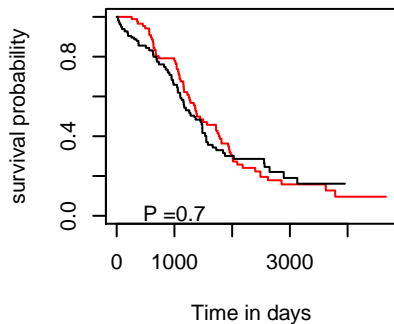

**PFI hsa-mir-3188**

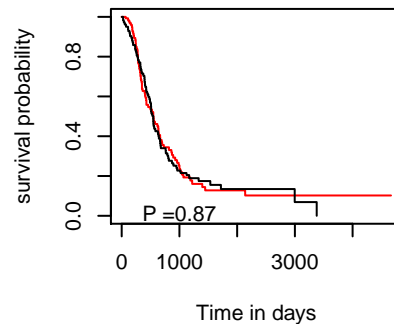

**DFI hsa-mir-3188**

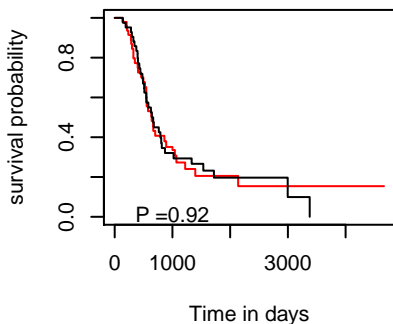

**DSS hsa-mir-3188**

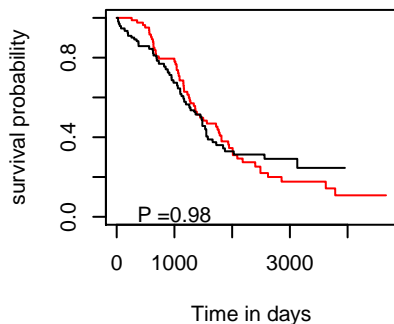

**OS hsa-mir-1268b**

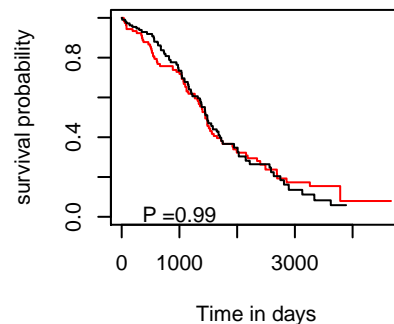

**PFI hsa-mir-1268b**

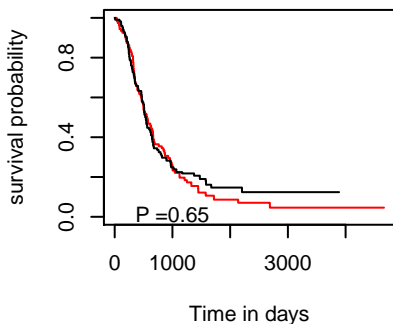

**DFI hsa-mir-1268b**

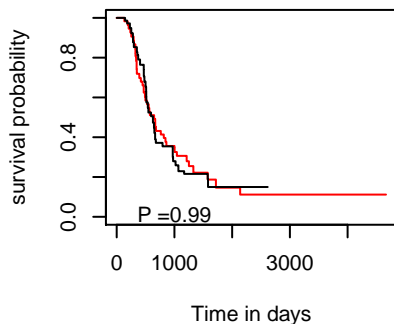

**DSS hsa-mir-1268b**

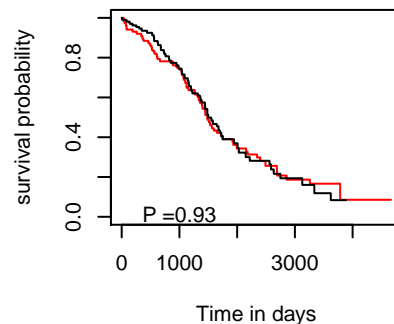

**OS hsa-mir-6787**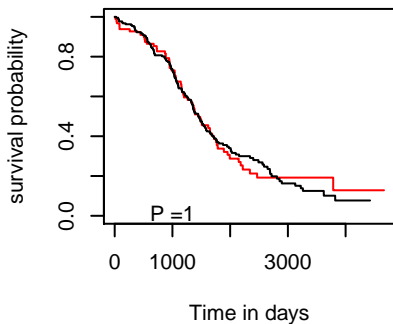**PFI hsa-mir-6787**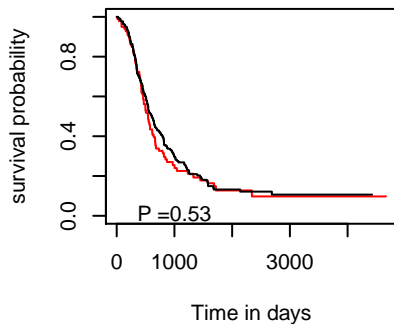**DFI hsa-mir-6787**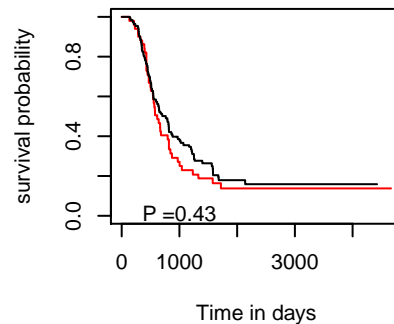**DSS hsa-mir-6787**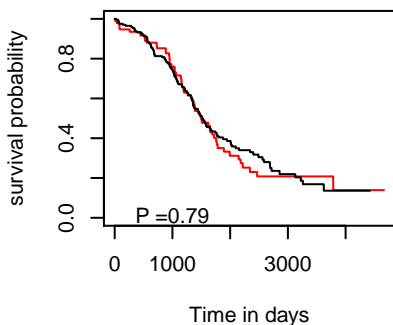**OS hsa-mir-4710**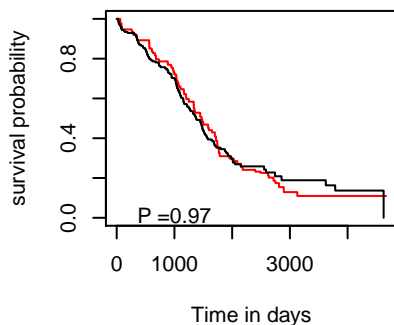**PFI hsa-mir-4710**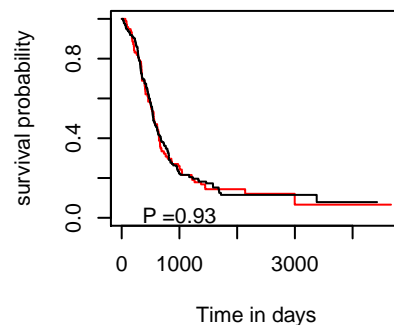**DFI hsa-mir-4710**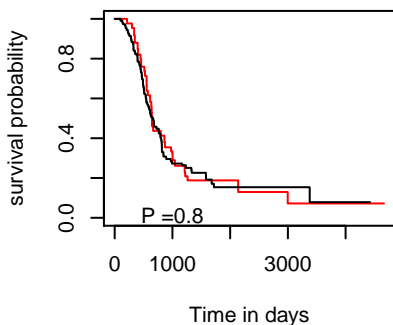**DSS hsa-mir-4710**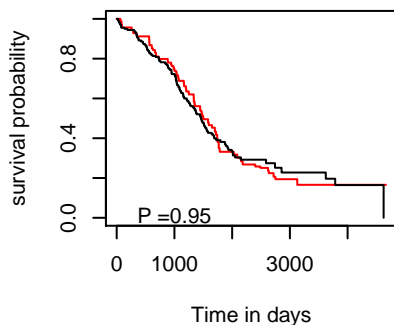**OS hsa-mir-6515**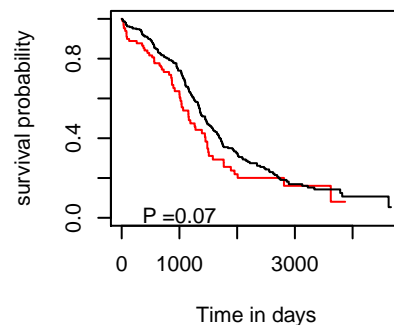

**PFI hsa-mir-6515**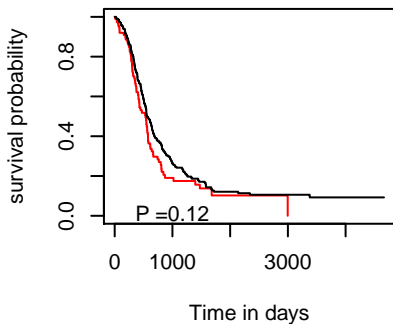**DFI hsa-mir-6515**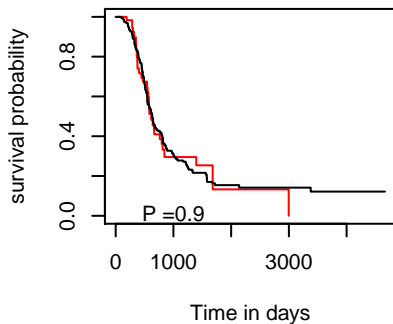**DSS hsa-mir-6515**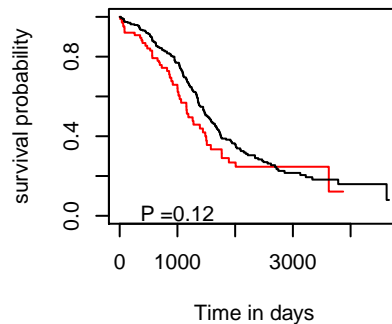**OS hsa-mir-6793**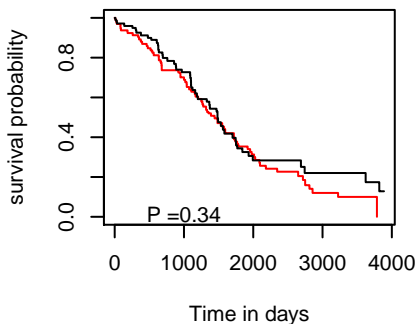**PFI hsa-mir-6793**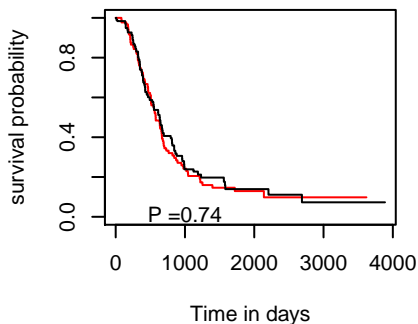**DFI hsa-mir-6793**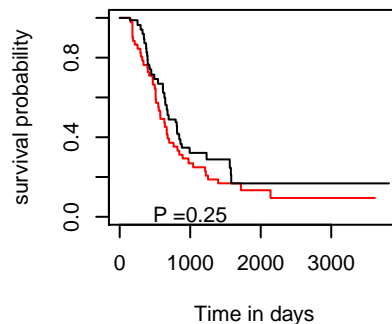**DSS hsa-mir-6793**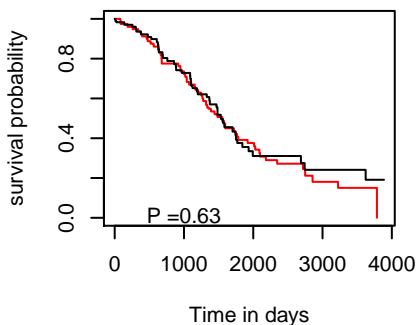**OS hsa-mir-3940**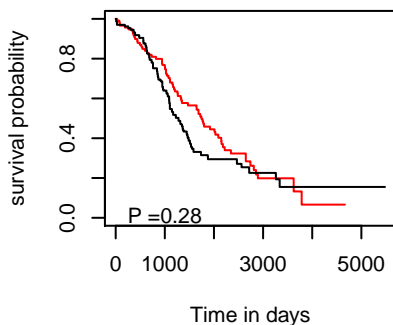**PFI hsa-mir-3940**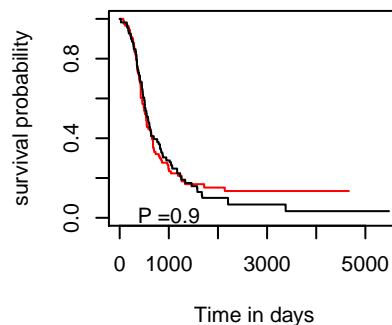

**DFI hsa-mir-3940**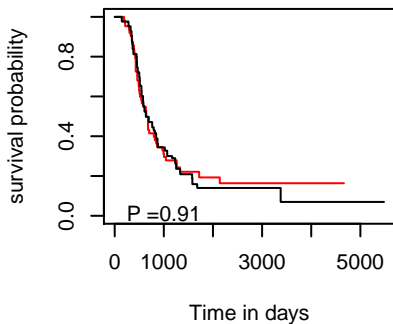**DSS hsa-mir-3940**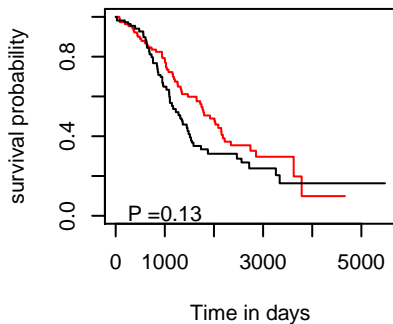**OS hsa-mir-200c**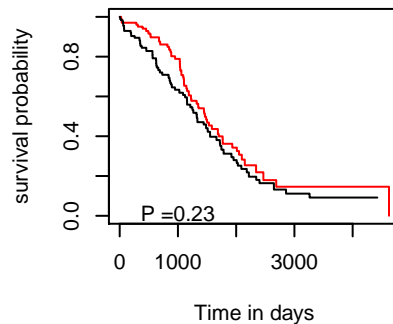**PFI hsa-mir-200c**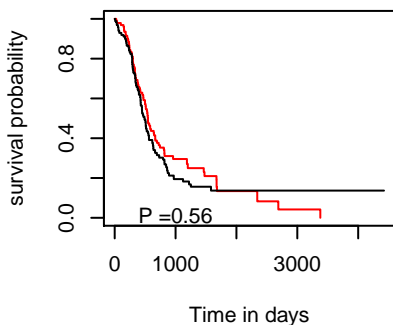**DFI hsa-mir-200c**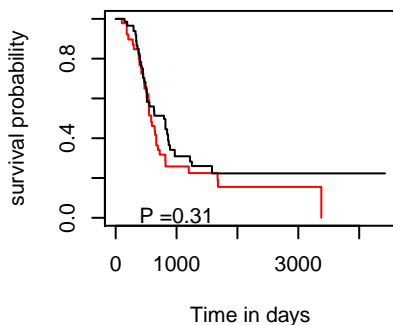**DSS hsa-mir-200c**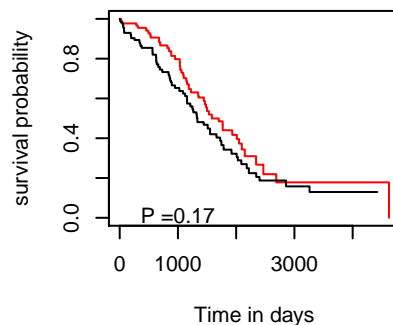**OS hsa-mir-6885**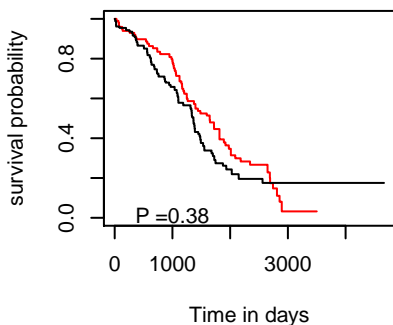**PFI hsa-mir-6885**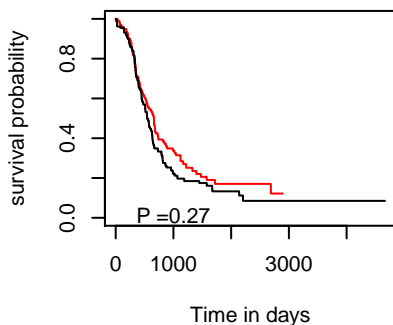**DFI hsa-mir-6885**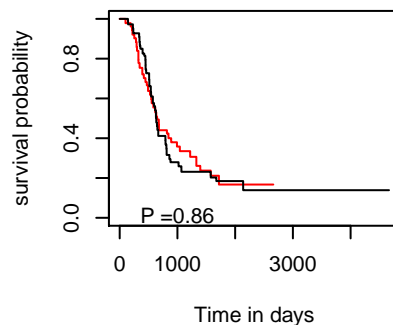

DSS hsa-mir-6885

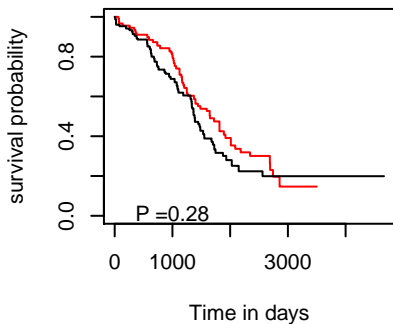

OS hsa-mir-4636

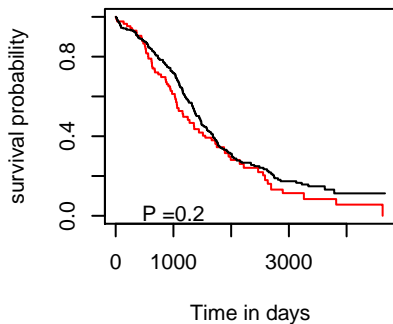

PFI hsa-mir-4636

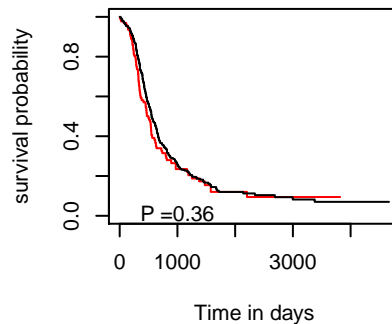

DFI hsa-mir-4636

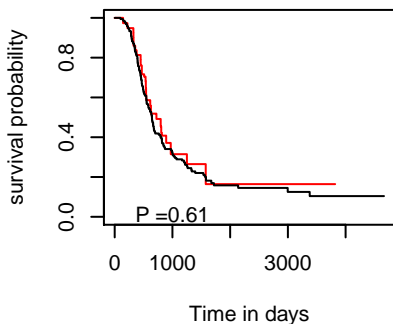

DSS hsa-mir-4636

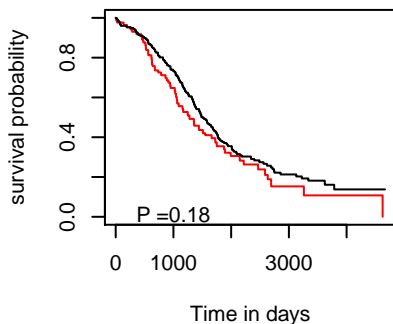

OS hsa-mir-1910

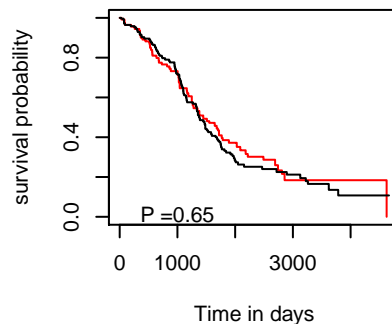

PFI hsa-mir-1910

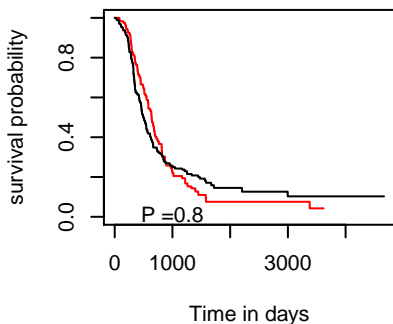

DFI hsa-mir-1910

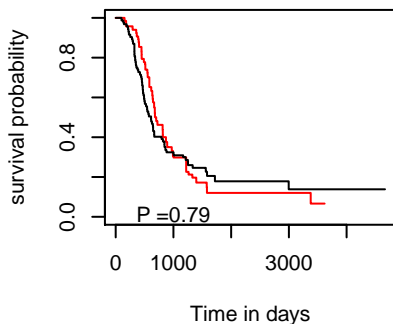

DSS hsa-mir-1910

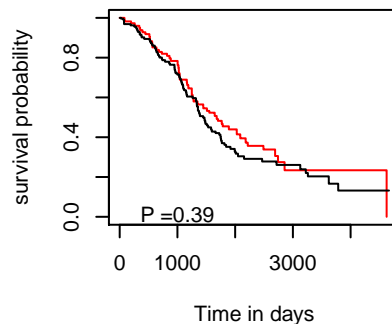

**OS hsa-mir-203a**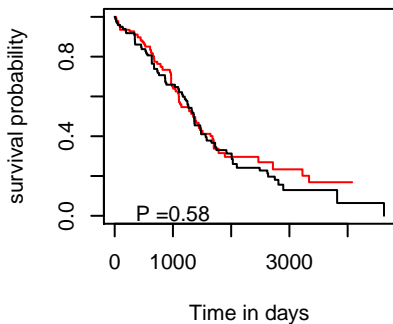**PFI hsa-mir-203a**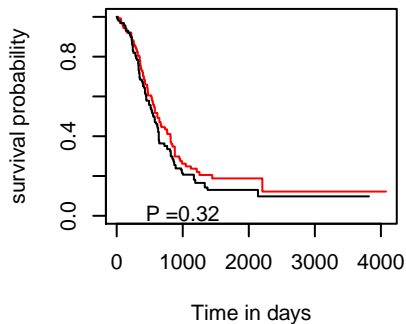**DFI hsa-mir-203a**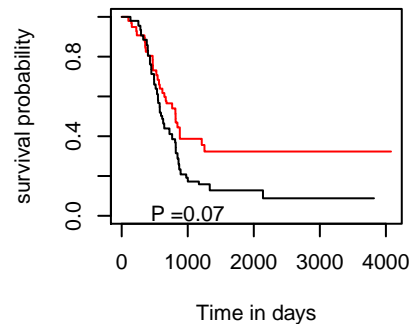**DSS hsa-mir-203a**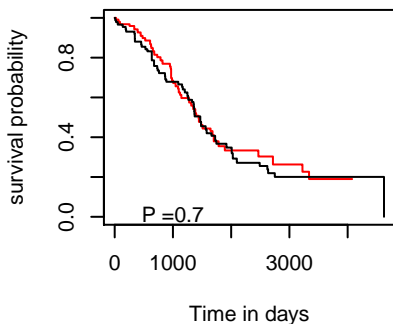**OS hsa-mir-4700**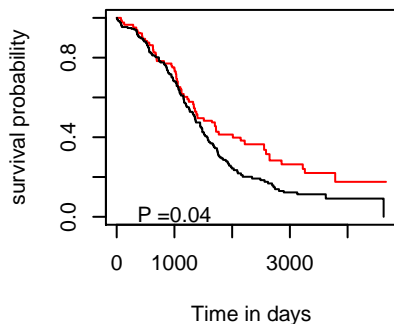**PFI hsa-mir-4700**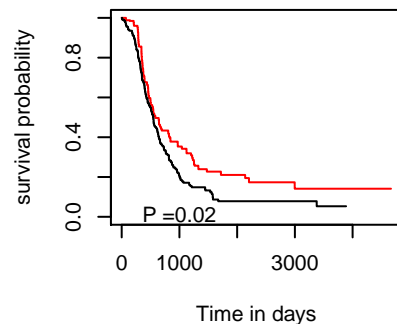**DFI hsa-mir-4700**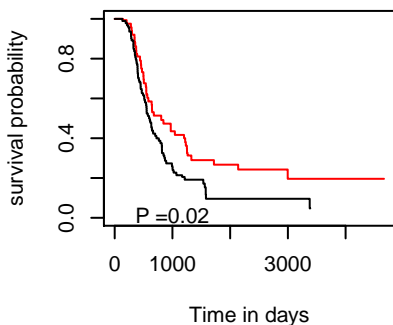**DSS hsa-mir-4700**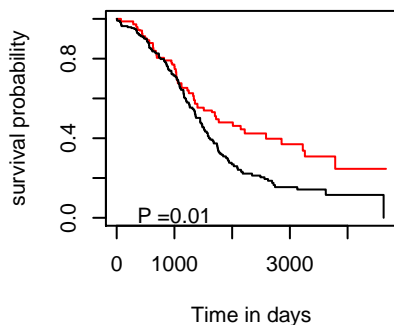**OS hsa-mir-10b**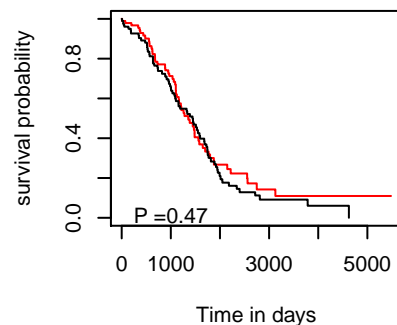

**PFI hsa-mir-10b**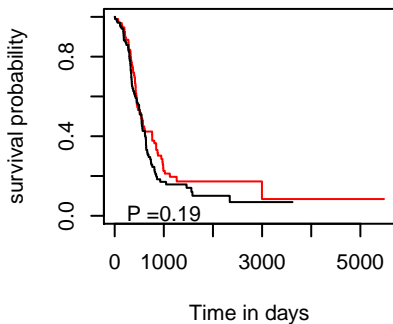**DFI hsa-mir-10b**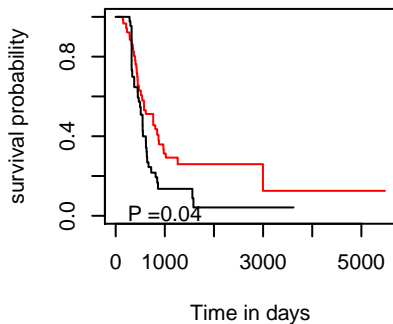**DSS hsa-mir-10b**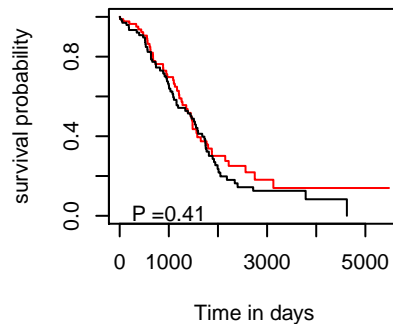**OS hsa-mir-4444-1**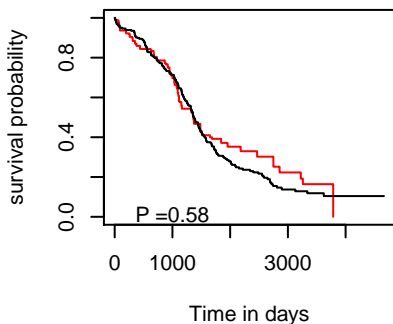**PFI hsa-mir-4444-1**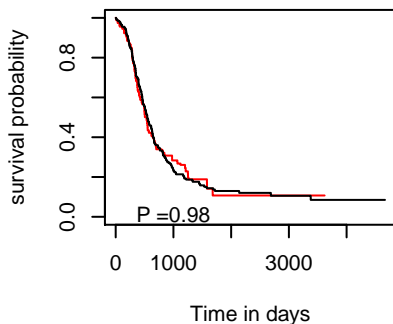**DFI hsa-mir-4444-1**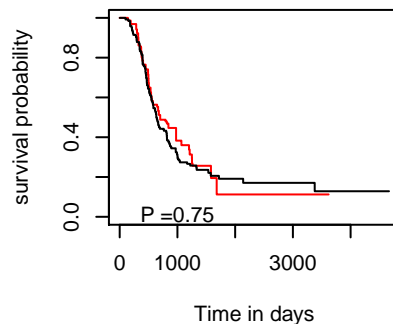**DSS hsa-mir-4444-1**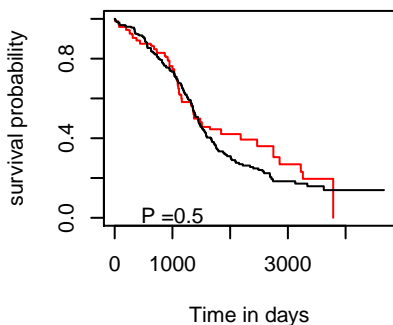**OS hsa-mir-1238**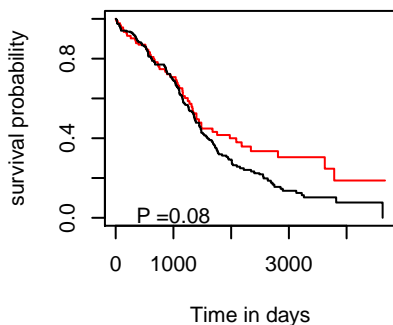**PFI hsa-mir-1238**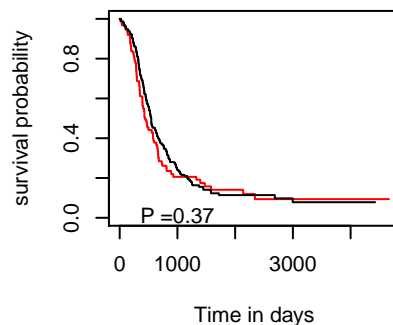

**DFI hsa-mir-1238**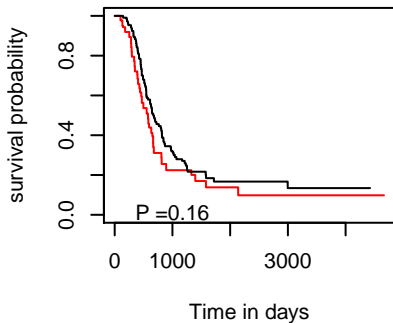**DSS hsa-mir-1238**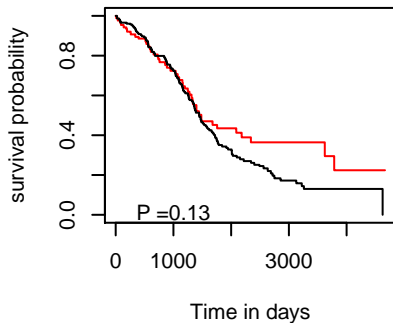**OS hsa-mir-6791**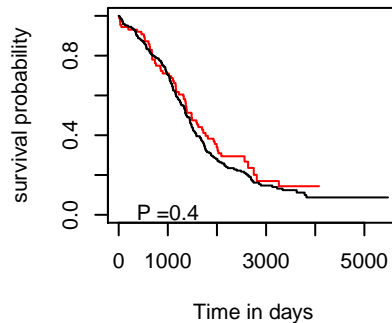**PFI hsa-mir-6791**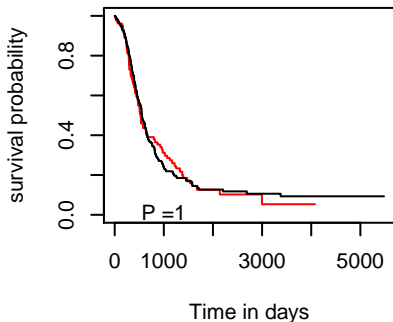**DFI hsa-mir-6791**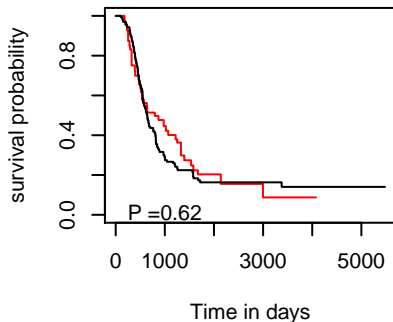**DSS hsa-mir-6791**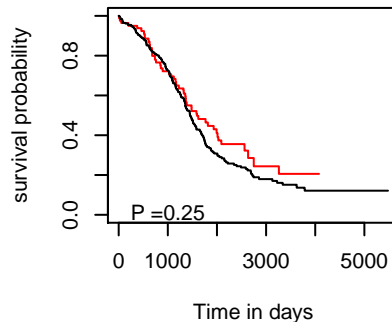**OS hsa-mir-4714**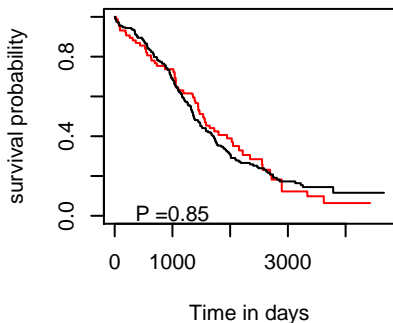**PFI hsa-mir-4714**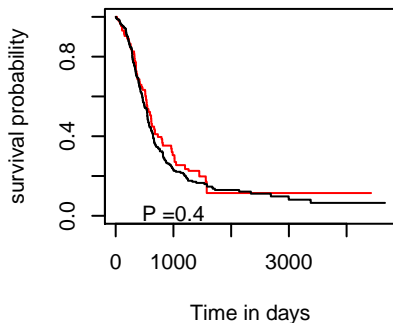**DFI hsa-mir-4714**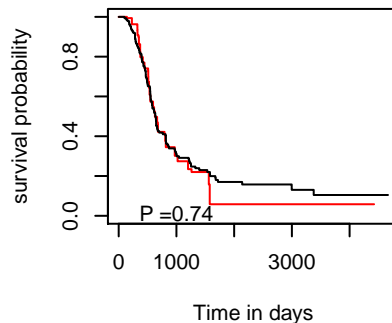

DSS hsa-mir-4714

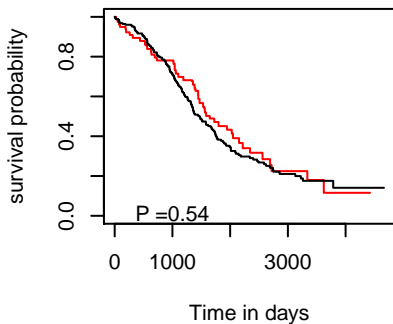

OS hsa-let-7g

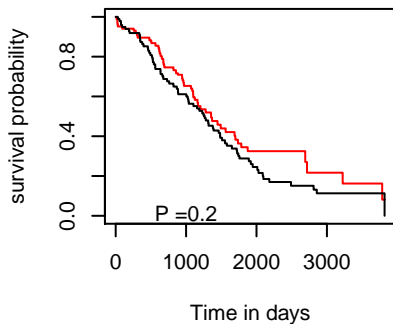

PFI hsa-let-7g

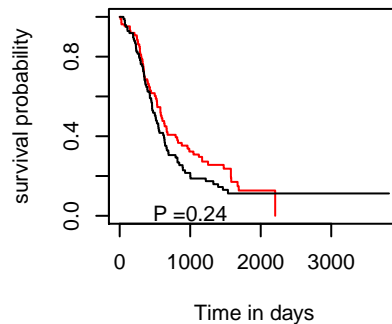

DFI hsa-let-7g

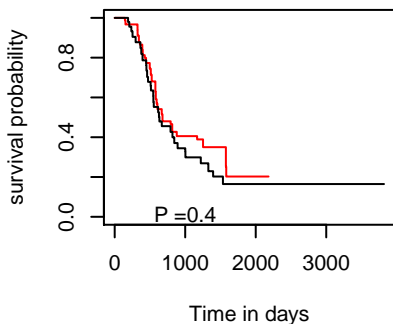

DSS hsa-let-7g

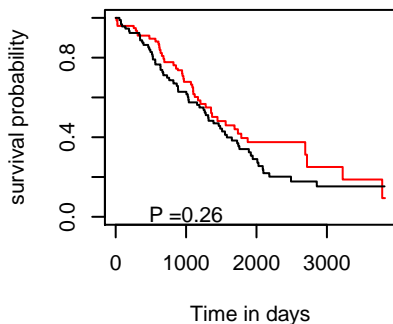

OS hsa-mir-135a-1

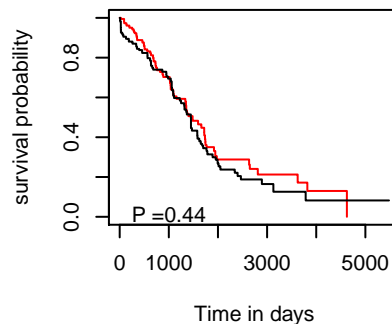

PFI hsa-mir-135a-1

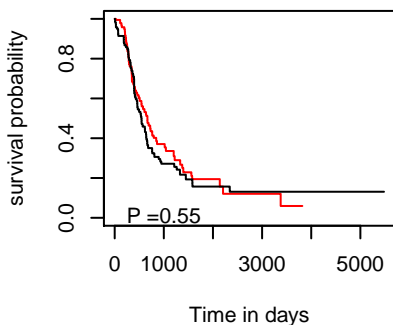

DFI hsa-mir-135a-1

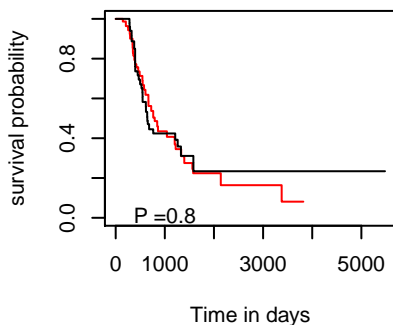

DSS hsa-mir-135a-1

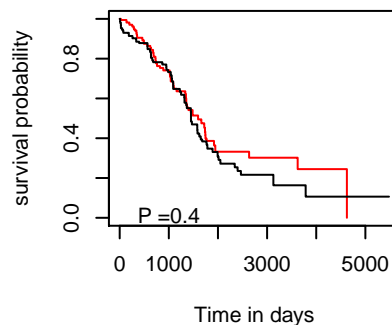

**OS hsa-mir-203b**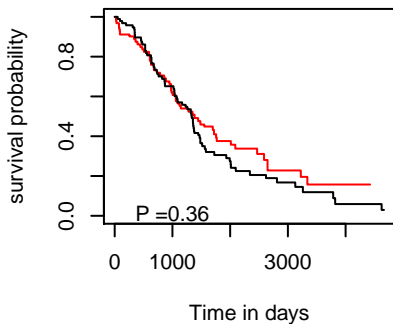**PFI hsa-mir-203b**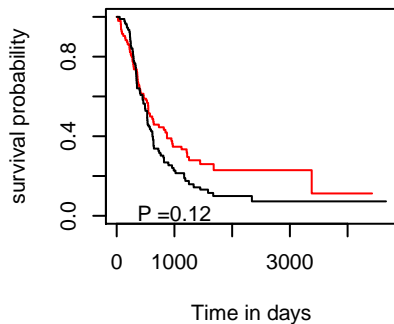**DFI hsa-mir-203b**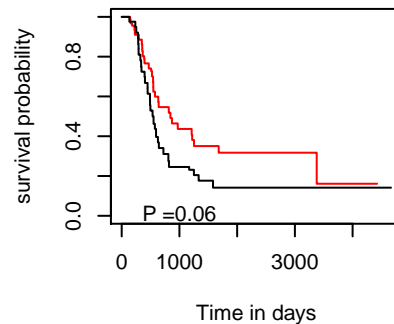**DSS hsa-mir-203b**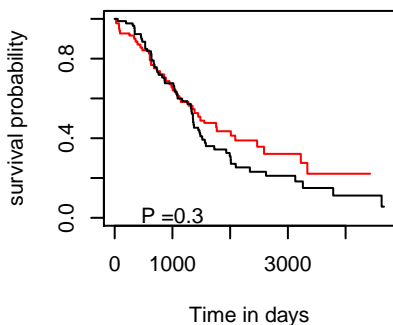**OS hsa-mir-3187**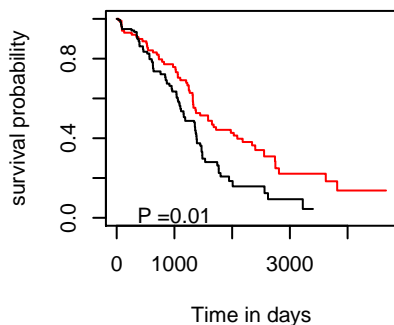**PFI hsa-mir-3187**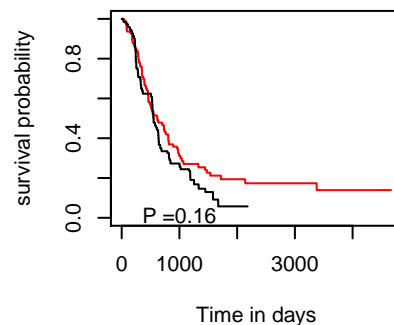**DFI hsa-mir-3187**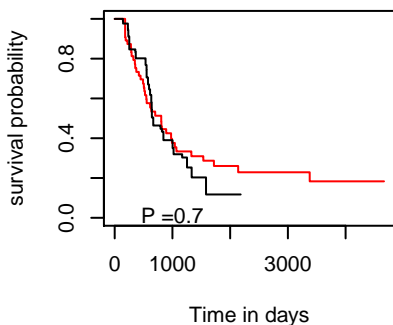**DSS hsa-mir-3187**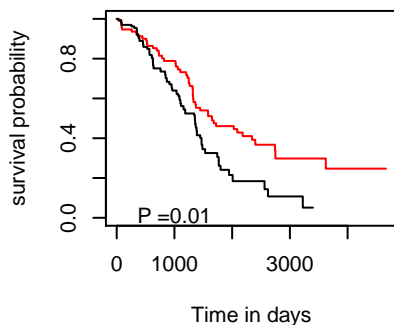**OS hsa-mir-4793**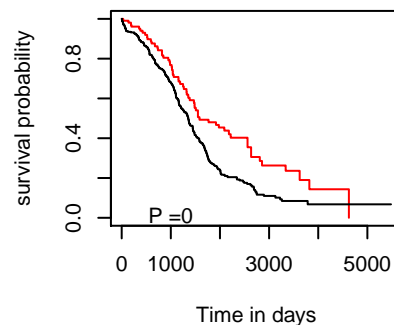

**PFI hsa-mir-4793**

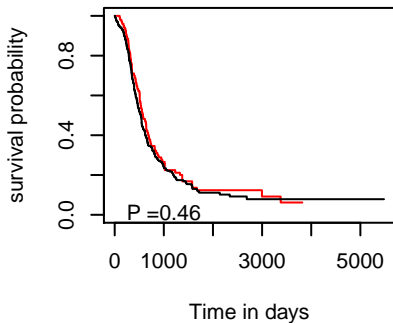

**DFI hsa-mir-4793**

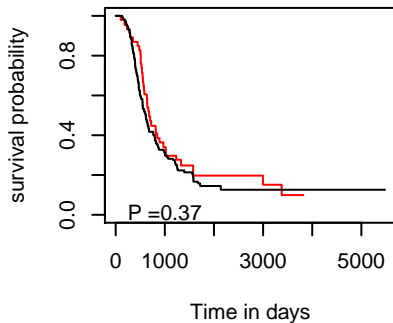

**DSS hsa-mir-4793**

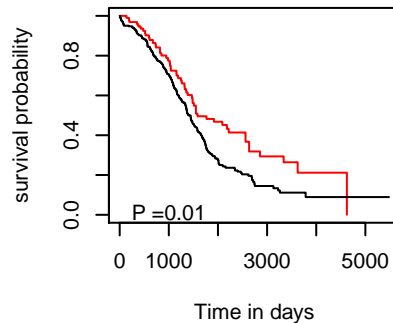

**OS hsa-mir-6824**

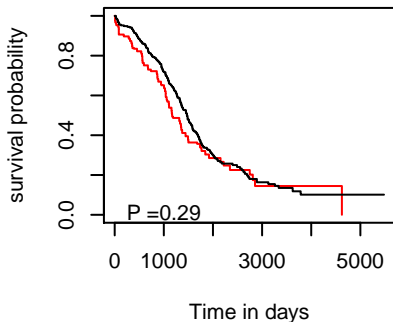

**PFI hsa-mir-6824**

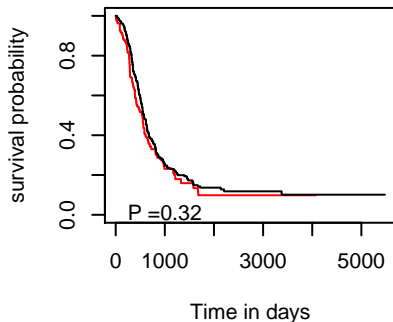

**DFI hsa-mir-6824**

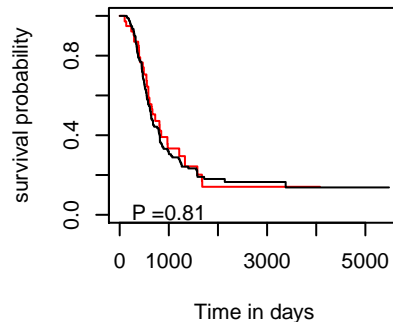

**DSS hsa-mir-6824**

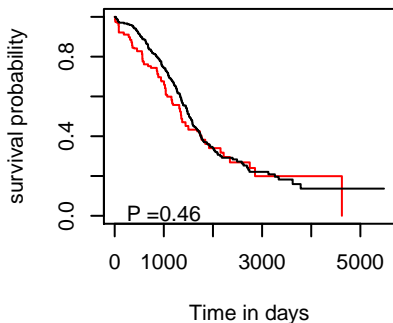

**OS hsa-mir-7854**

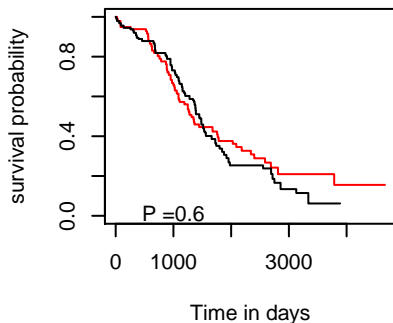

**PFI hsa-mir-7854**

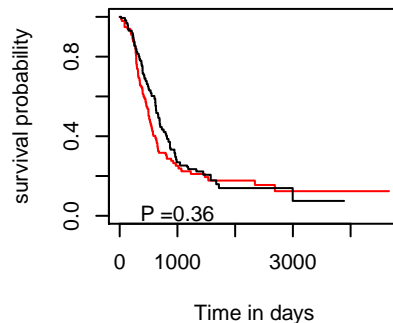

**DFI hsa-mir-7854**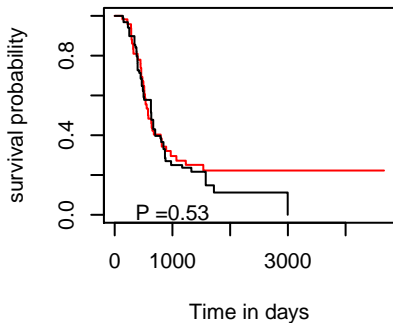**DSS hsa-mir-7854**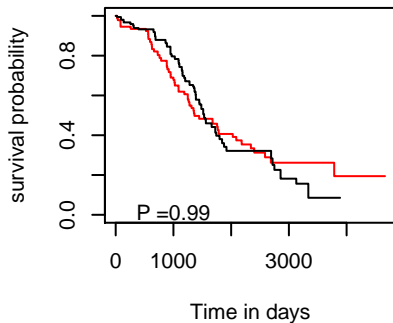**OS hsa-mir-378b**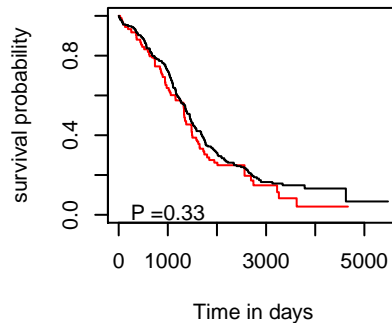**PFI hsa-mir-378b**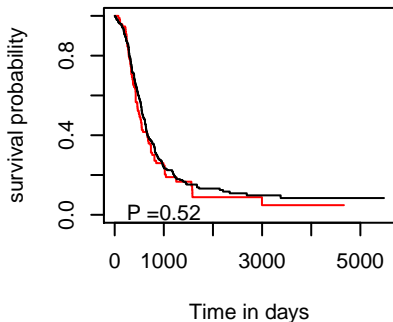**DFI hsa-mir-378b**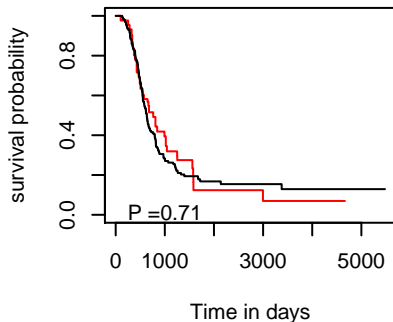**DSS hsa-mir-378b**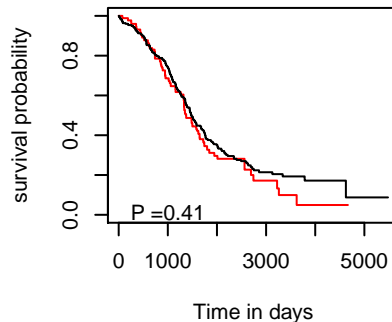**OS hsa-mir-6766**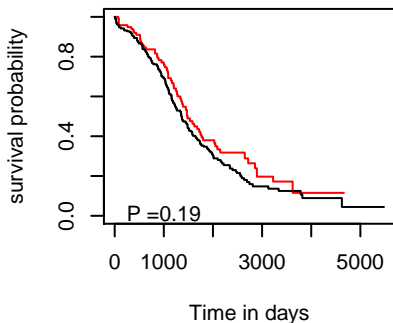**PFI hsa-mir-6766**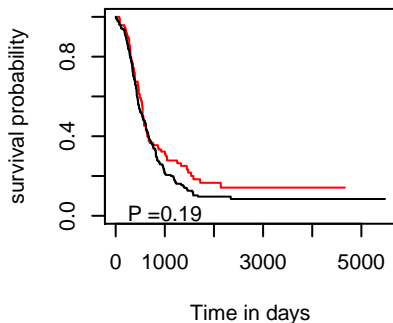**DFI hsa-mir-6766**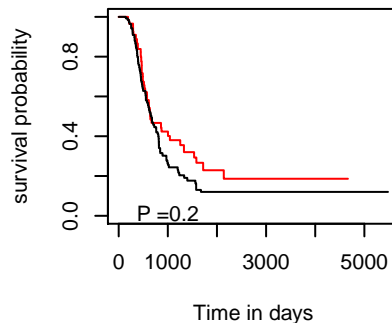

**DSS hsa-mir-6766**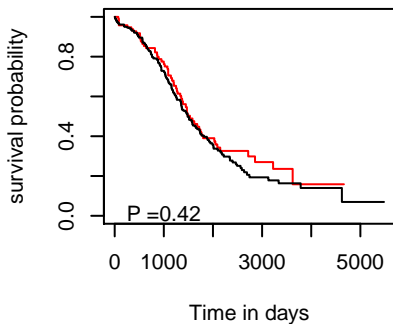**OS hsa-mir-425**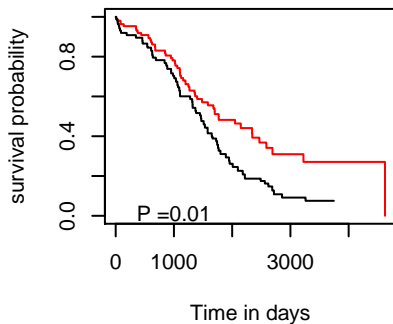**PFI hsa-mir-425**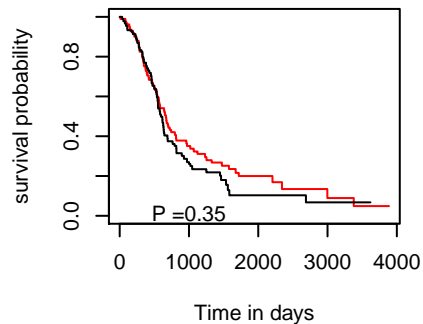**DFI hsa-mir-425**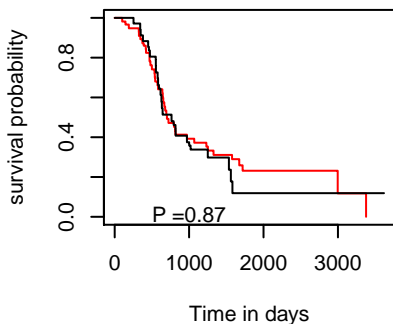**DSS hsa-mir-425**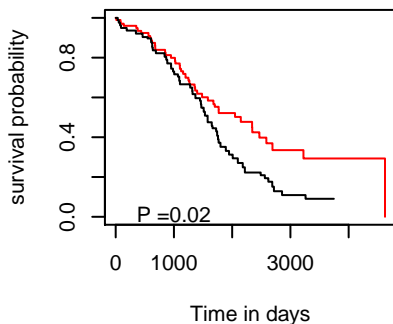**OS hsa-mir-4443**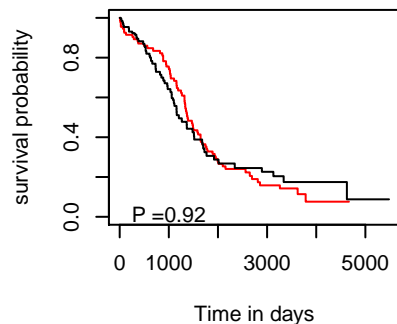**PFI hsa-mir-4443**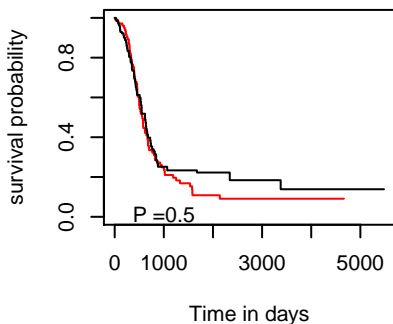**DFI hsa-mir-4443**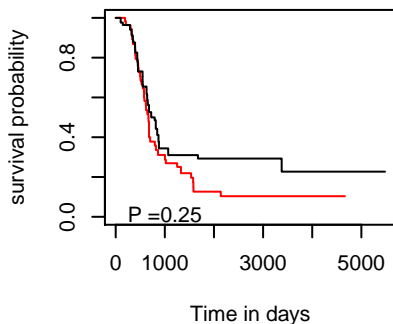**DSS hsa-mir-4443**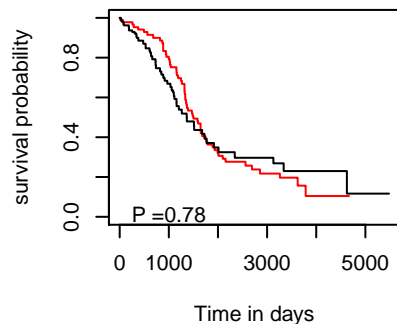

**OS hsa-mir-7704**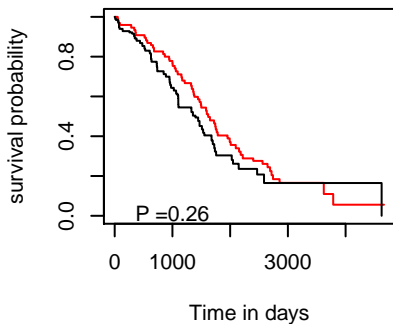**PFI hsa-mir-7704**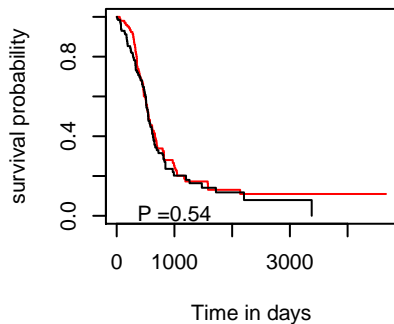**DFI hsa-mir-7704**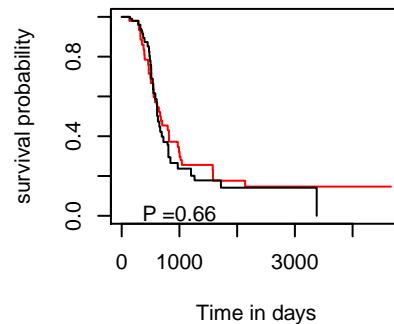**DSS hsa-mir-7704**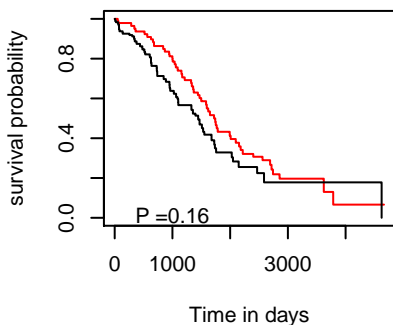**OS hsa-mir-1258**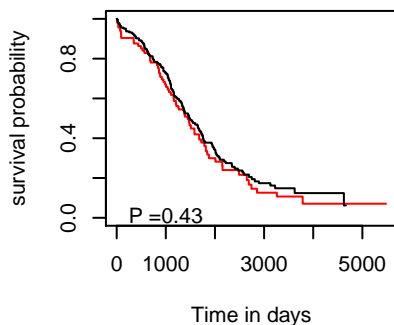**PFI hsa-mir-1258**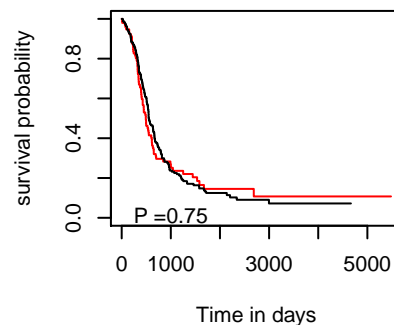**DFI hsa-mir-1258**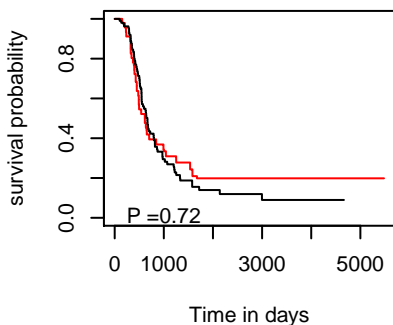**DSS hsa-mir-1258**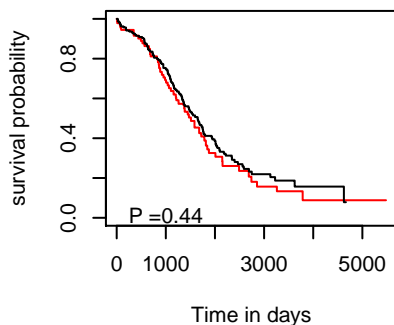**OS hsa-mir-3612**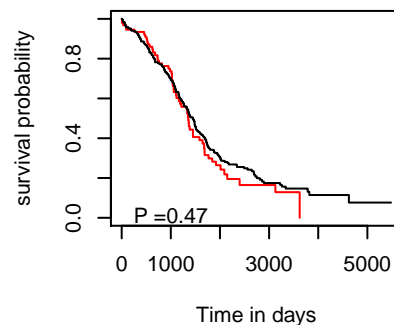

**PFI hsa-mir-3612**

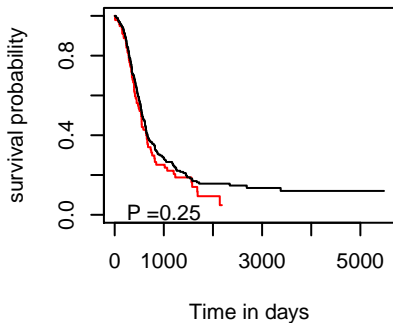

**DFI hsa-mir-3612**

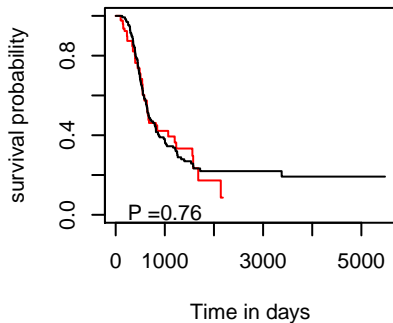

**DSS hsa-mir-3612**

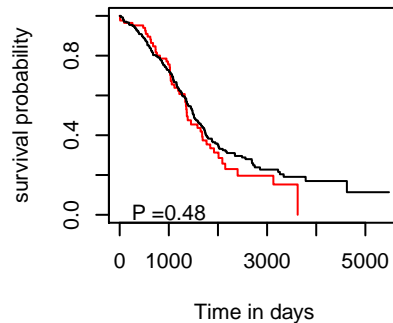

**OS hsa-mir-8072**

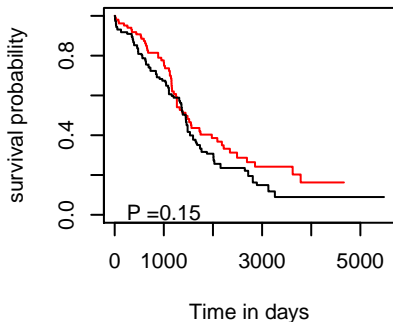

**PFI hsa-mir-8072**

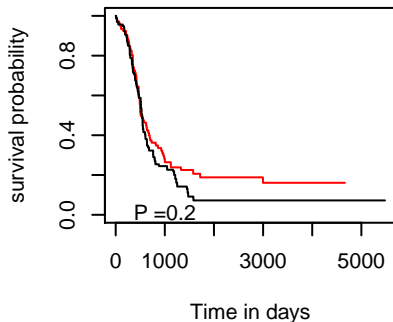

**DFI hsa-mir-8072**

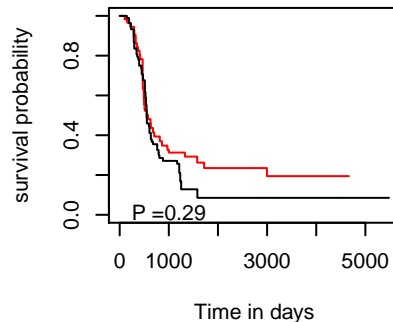

**DSS hsa-mir-8072**

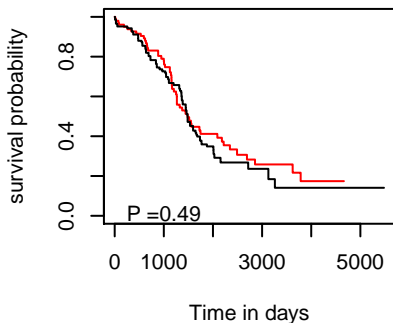

**OS hsa-mir-885**

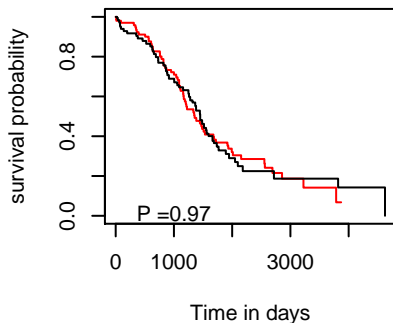

**PFI hsa-mir-885**

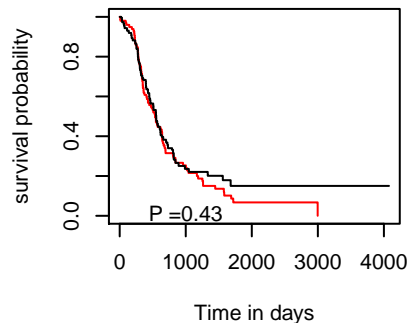

**DFI hsa-mir-885**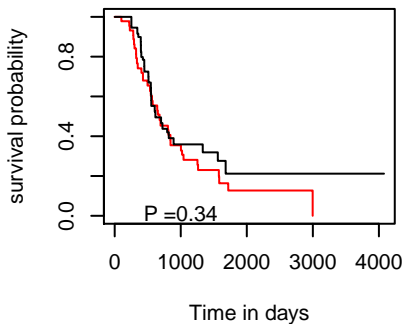**DSS hsa-mir-885**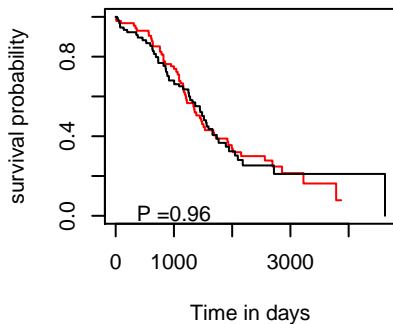**OS hsa-mir-6880**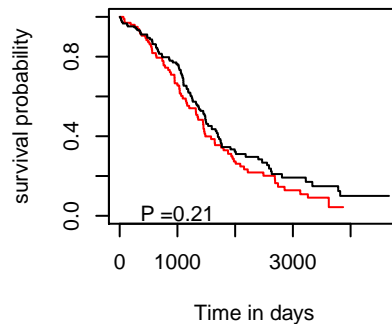**PFI hsa-mir-6880**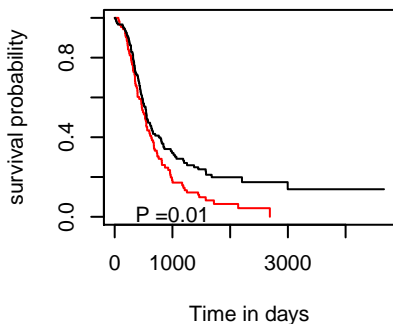**DFI hsa-mir-6880**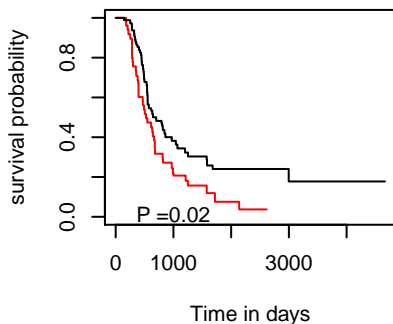**DSS hsa-mir-6880**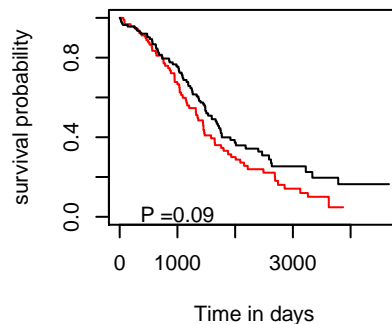**OS hsa-mir-3154**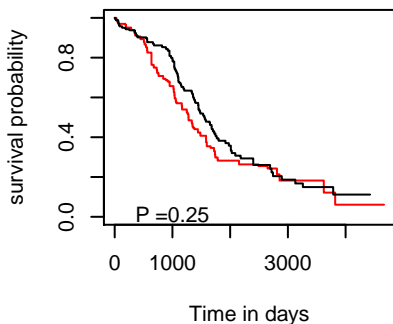**PFI hsa-mir-3154**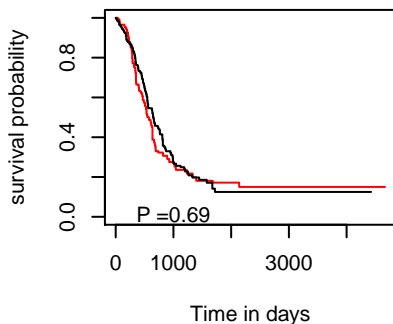**DFI hsa-mir-3154**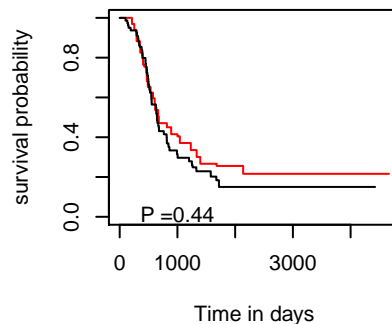

**DSS hsa-mir-3154**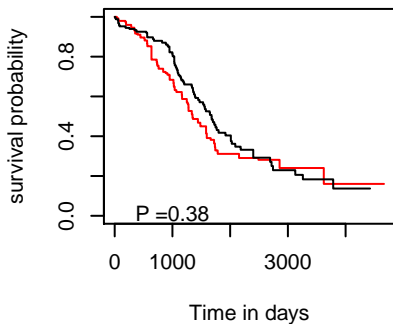**OS hsa-mir-625**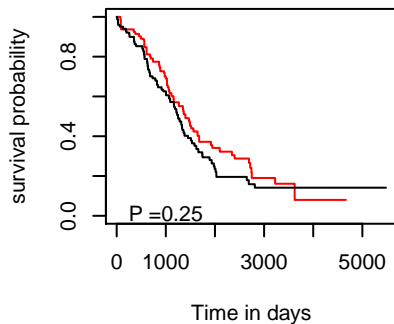**PFI hsa-mir-625**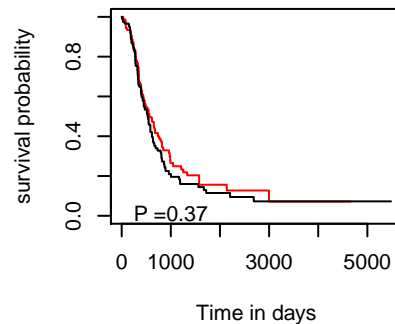**DFI hsa-mir-625**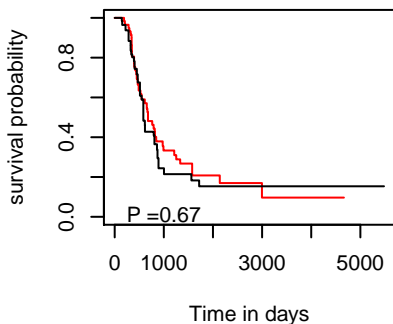**DSS hsa-mir-625**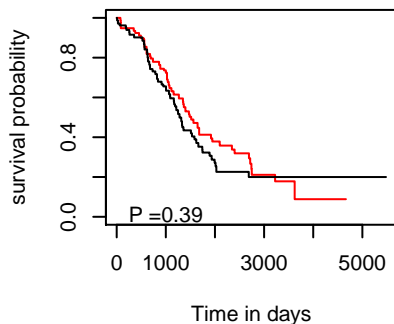**OS hsa-mir-141**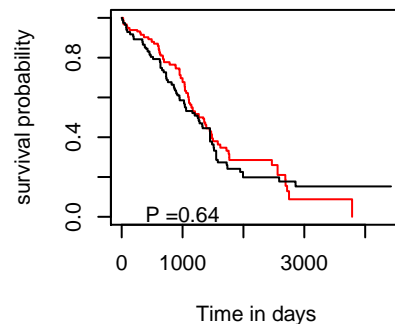**PFI hsa-mir-141**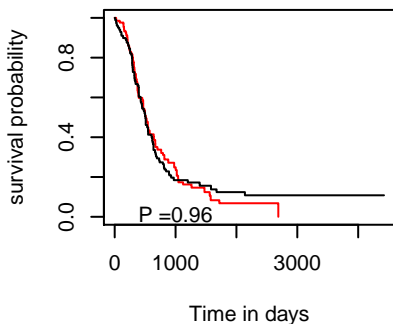**DFI hsa-mir-141**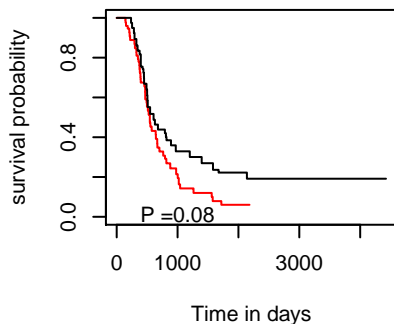**DSS hsa-mir-141**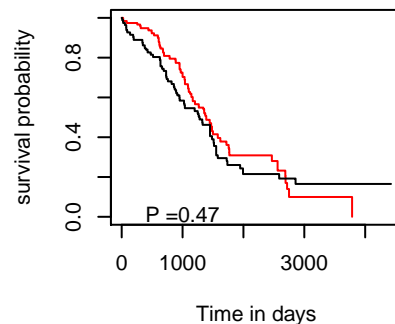

**OS hsa-mir-3648**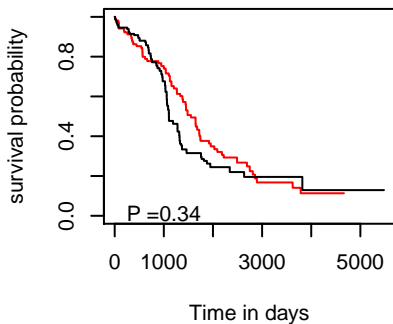**PFI hsa-mir-3648**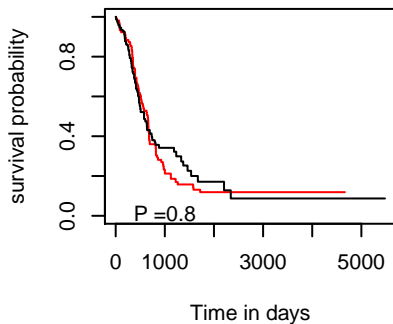**DFI hsa-mir-3648**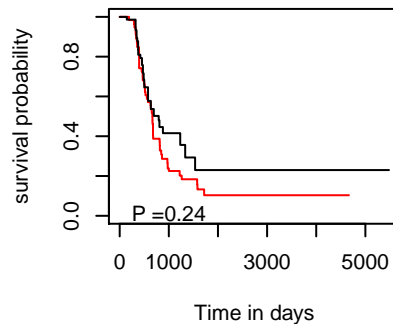**DSS hsa-mir-3648**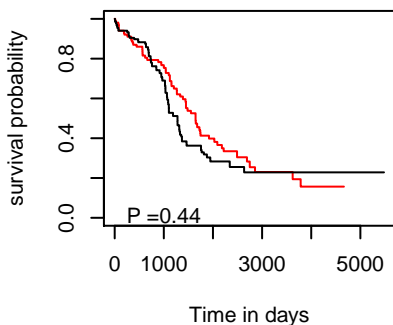**OS hsa-mir-1181**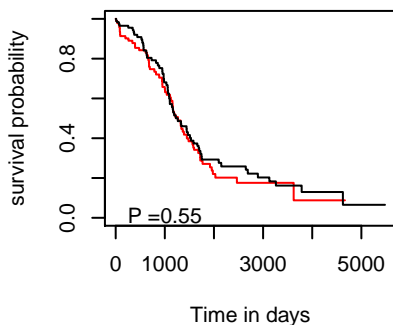**PFI hsa-mir-1181**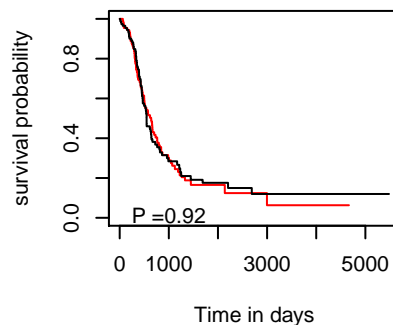**DFI hsa-mir-1181**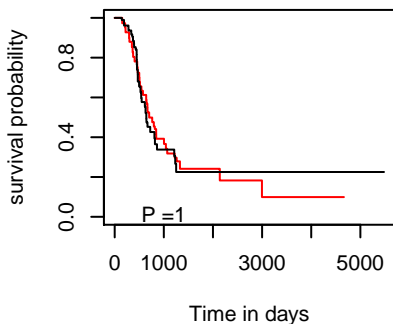**DSS hsa-mir-1181**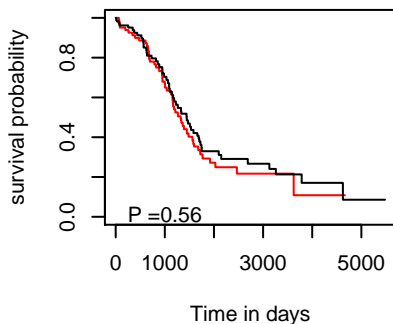**OS hsa-mir-632**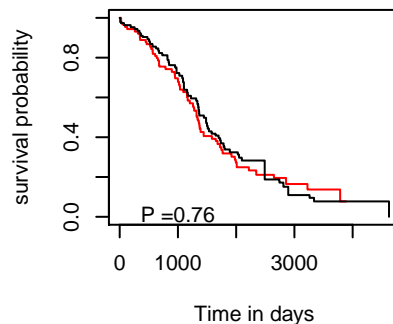

**PFI hsa-mir-632**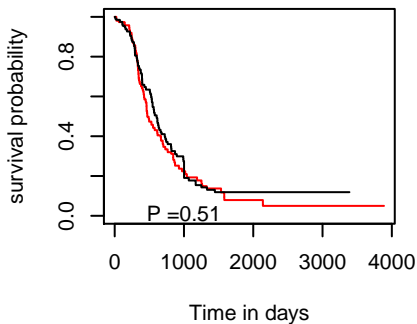**DFI hsa-mir-632**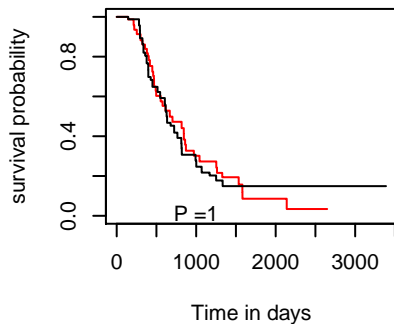**DSS hsa-mir-632**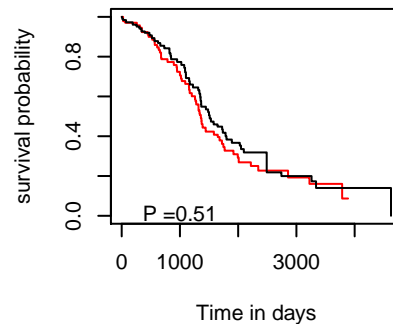**OS hsa-mir-6855**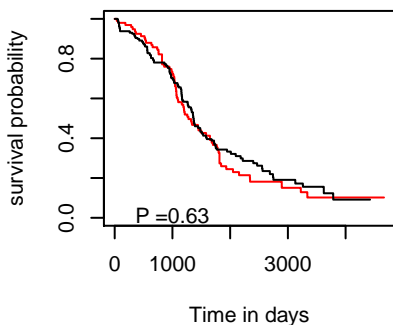**PFI hsa-mir-6855**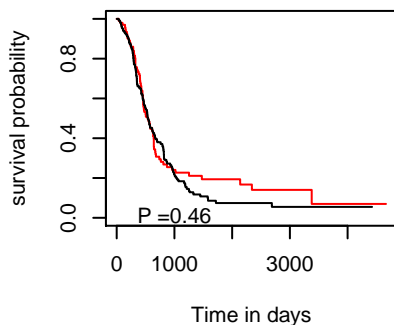**DFI hsa-mir-6855**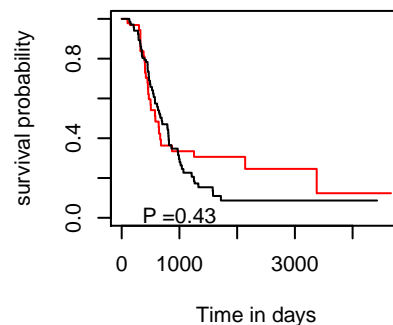**DSS hsa-mir-6855**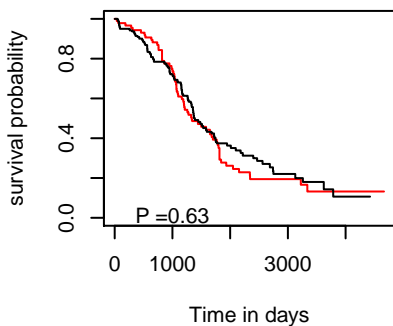**OS hsa-mir-326**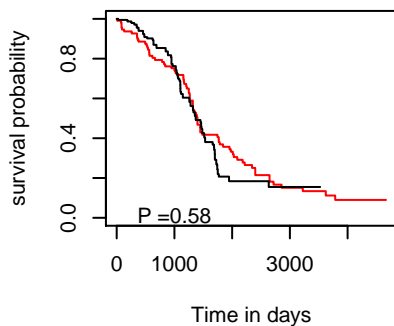**PFI hsa-mir-326**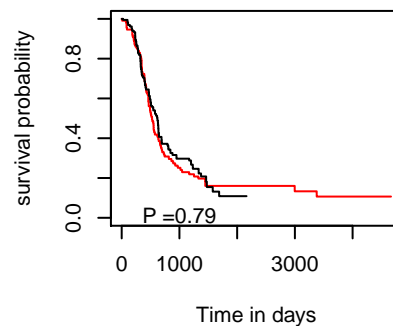

**DFI hsa-mir-326**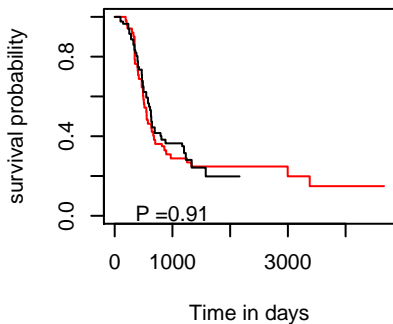**DSS hsa-mir-326**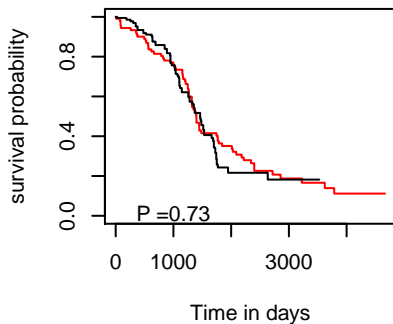**OS hsa-mir-5579**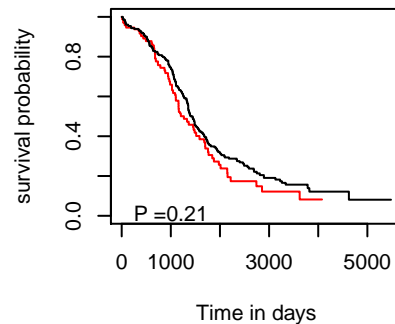**PFI hsa-mir-5579**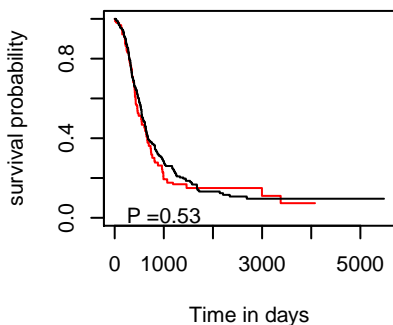**DFI hsa-mir-5579**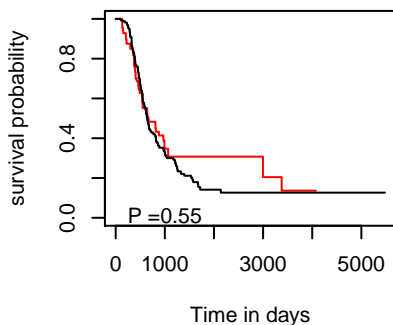**DSS hsa-mir-5579**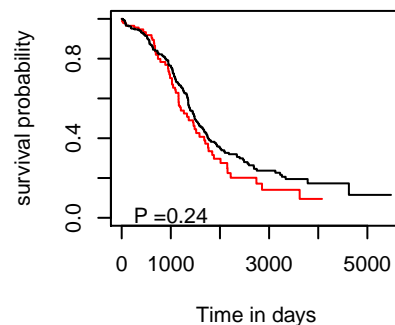**OS hsa-mir-6754**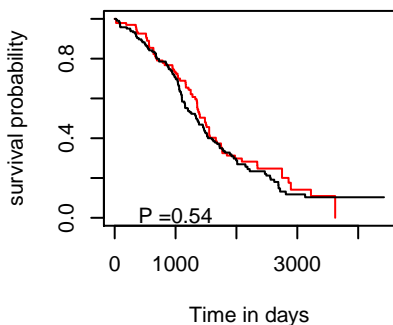**PFI hsa-mir-6754**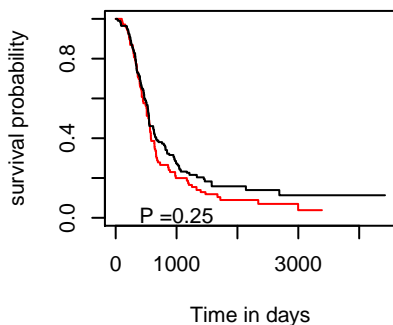**DFI hsa-mir-6754**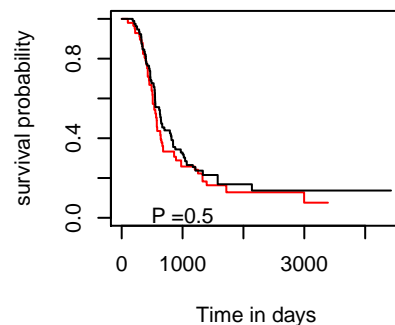

**DSS hsa-mir-6754**

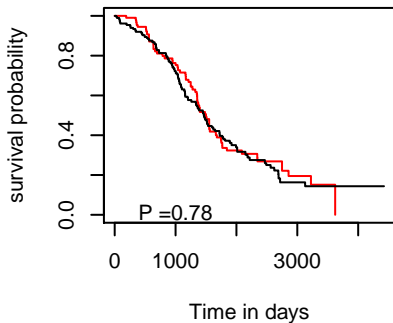

**OS hsa-mir-6755**

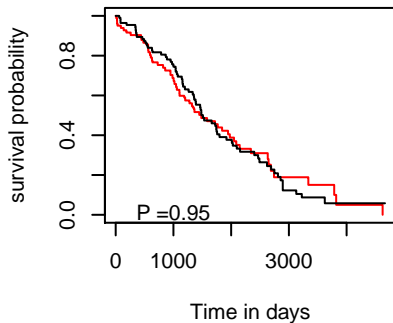

**PFI hsa-mir-6755**

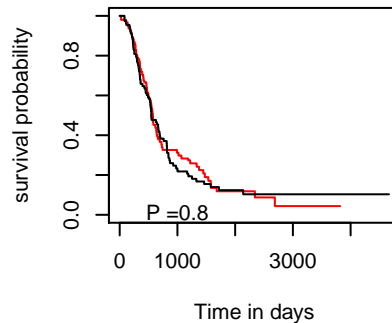

**DFI hsa-mir-6755**

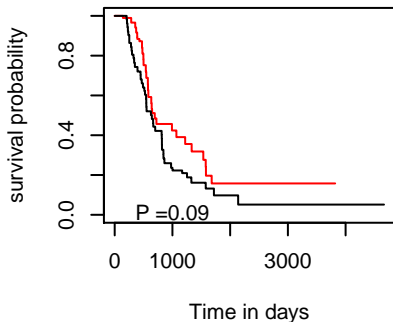

**DSS hsa-mir-6755**

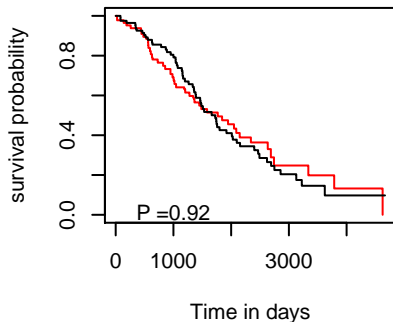

**OS hsa-mir-6877**

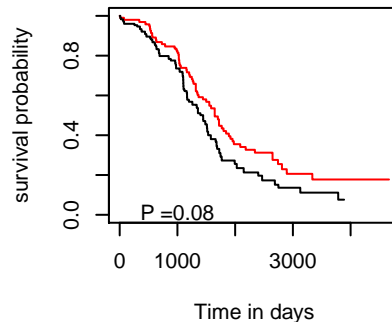

**PFI hsa-mir-6877**

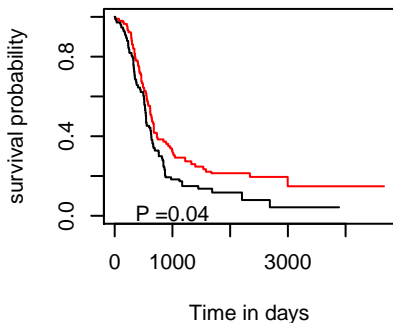

**DFI hsa-mir-6877**

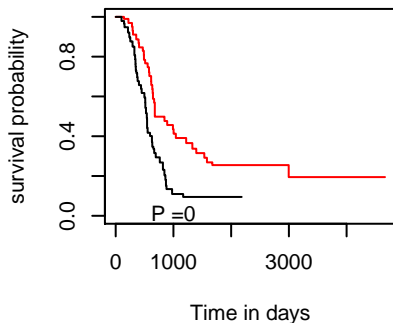

**DSS hsa-mir-6877**

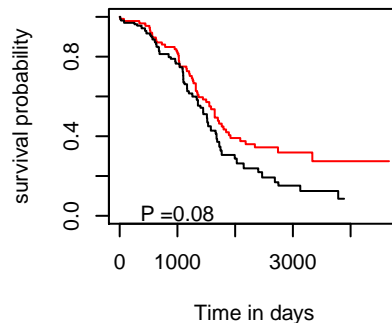

**OS hsa-mir-6872**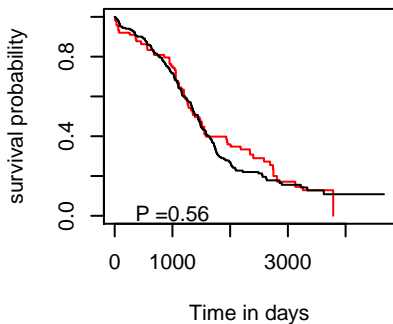**PFI hsa-mir-6872**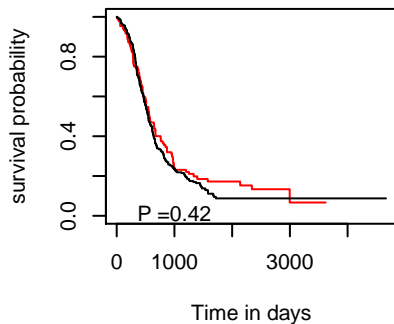**DFI hsa-mir-6872**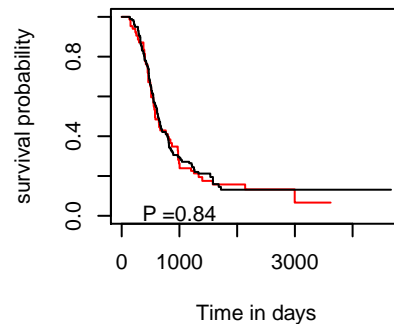**DSS hsa-mir-6872**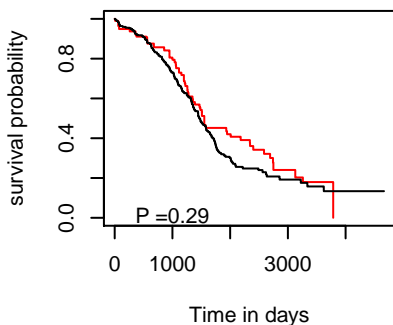**OS hsa-mir-3144**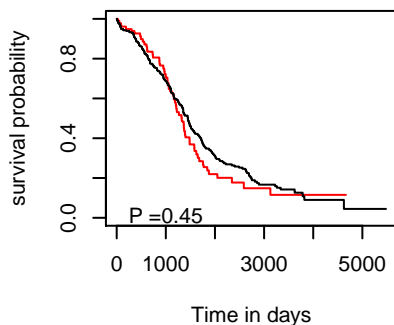**PFI hsa-mir-3144**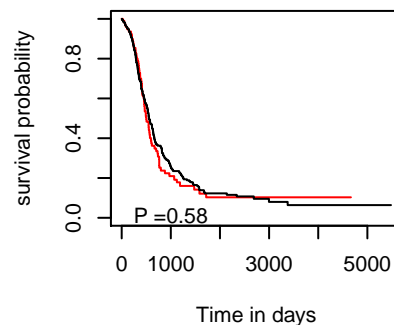**DFI hsa-mir-3144**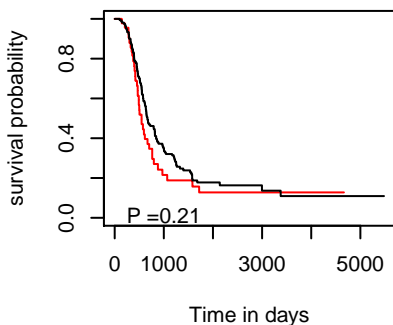**DSS hsa-mir-3144**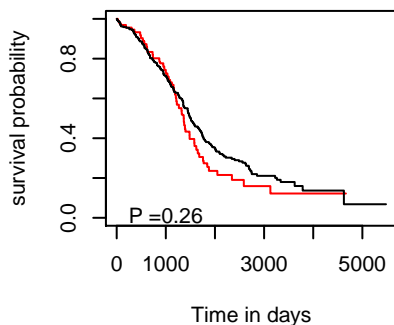**OS hsa-mir-5193**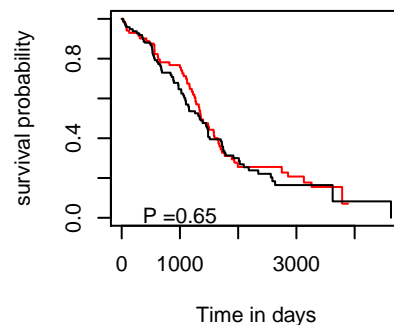

**PFI hsa-mir-5193**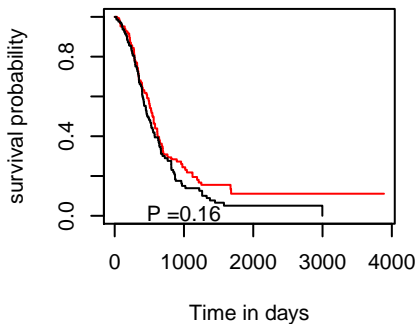**DFI hsa-mir-5193**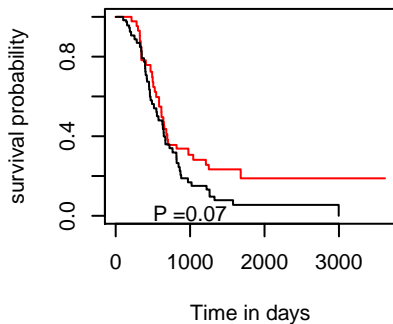**DSS hsa-mir-5193**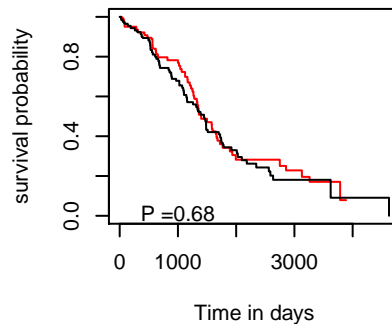**OS hsa-mir-3911**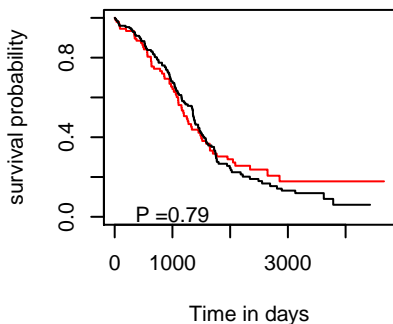**PFI hsa-mir-3911**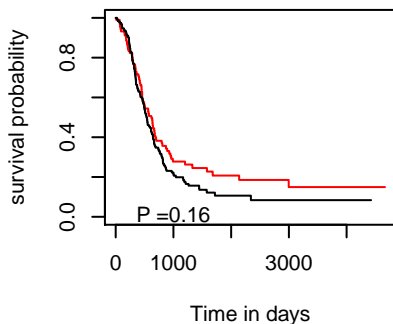**DFI hsa-mir-3911**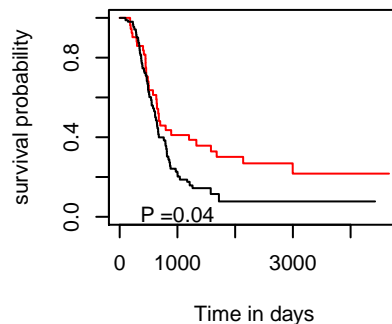**DSS hsa-mir-3911**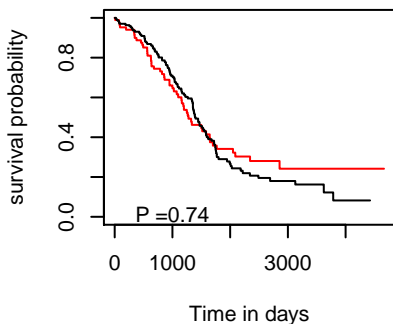**OS hsa-mir-191**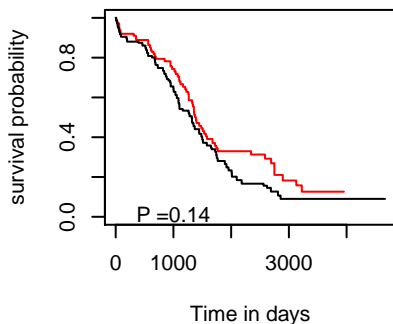**PFI hsa-mir-191**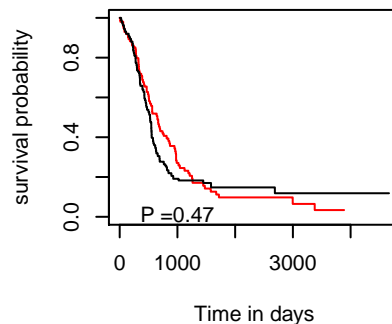



**DSS hsa-mir-6717**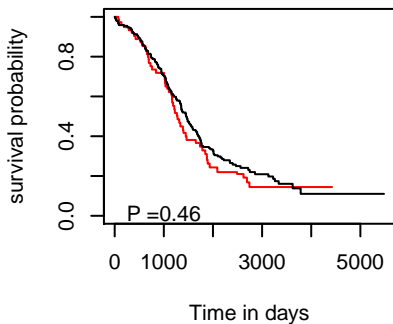**OS hsa-mir-199b**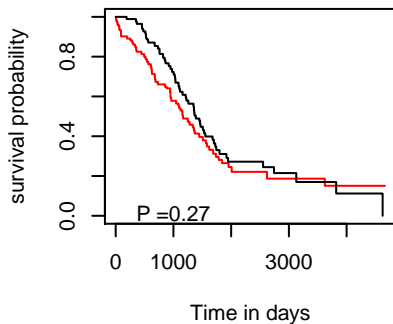**PFI hsa-mir-199b**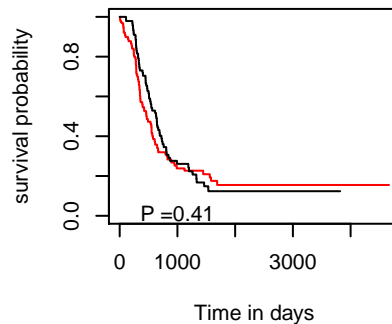**DFI hsa-mir-199b**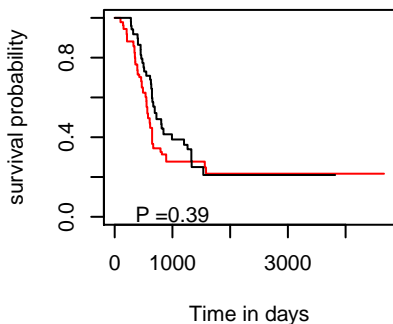**DSS hsa-mir-199b**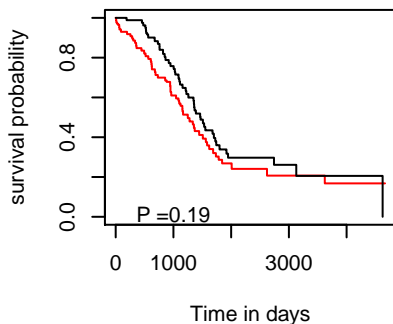**OS hsa-mir-151a**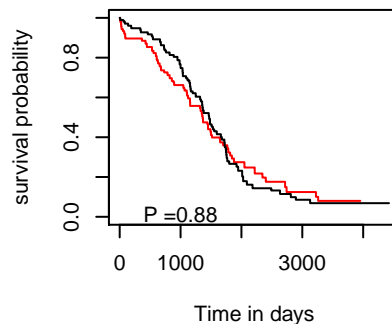**PFI hsa-mir-151a**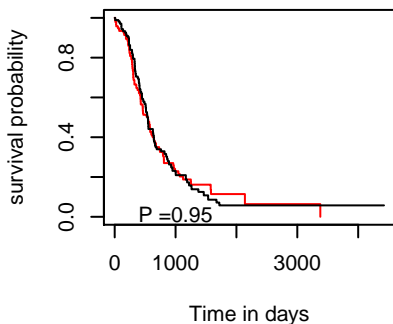**DFI hsa-mir-151a**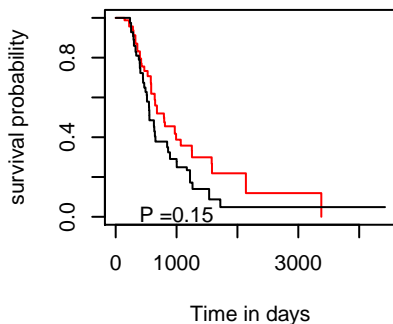**DSS hsa-mir-151a**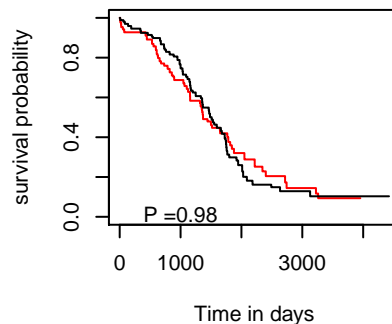

**OS hsa-mir-3132**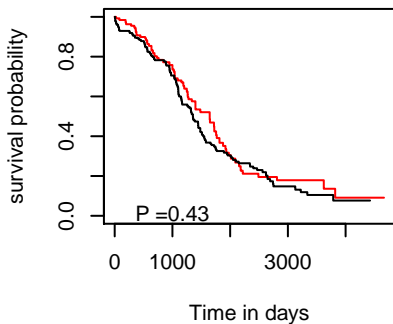**PFI hsa-mir-3132**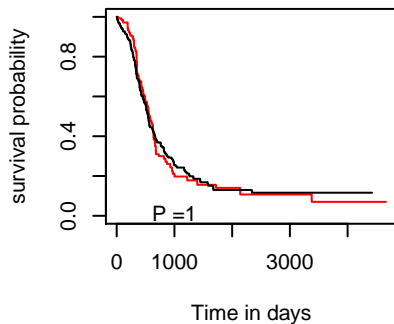**DFI hsa-mir-3132**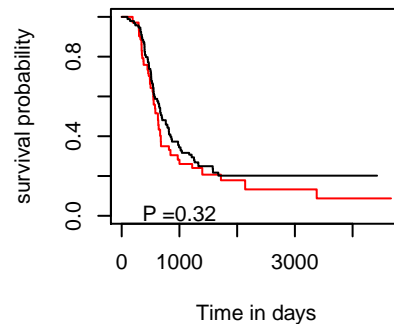**DSS hsa-mir-3132**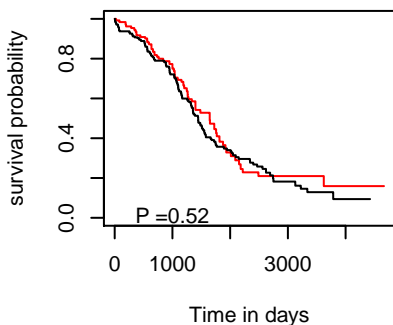**OS hsa-mir-339**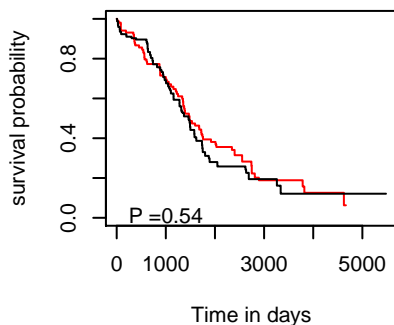**PFI hsa-mir-339**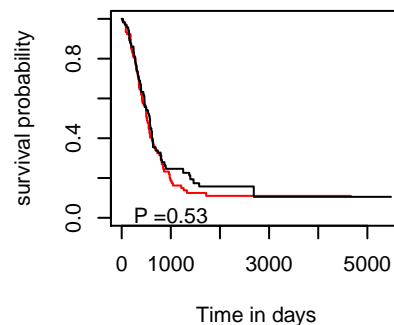**DFI hsa-mir-339**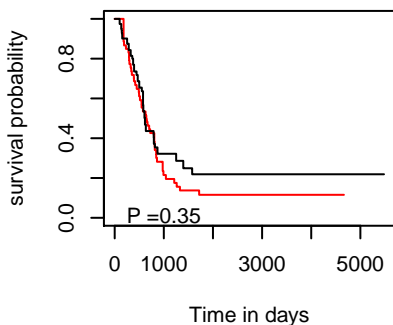**DSS hsa-mir-339**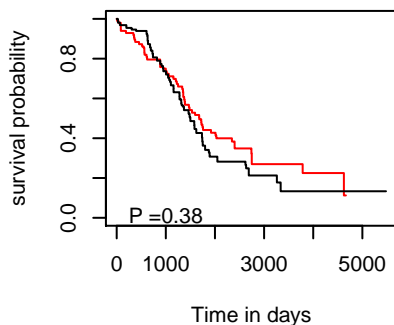**OS hsa-mir-5001**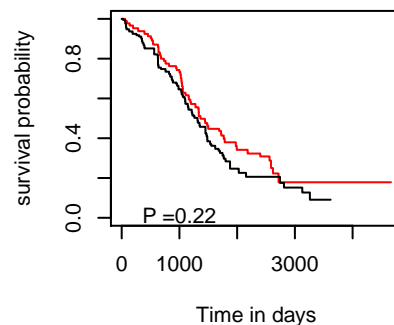

**PFI hsa-mir-5001**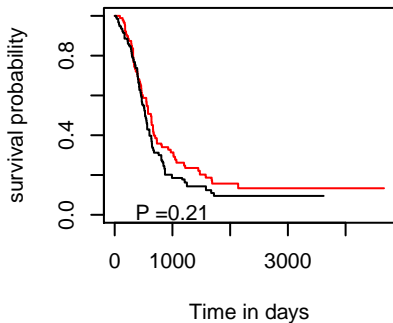**DFI hsa-mir-5001**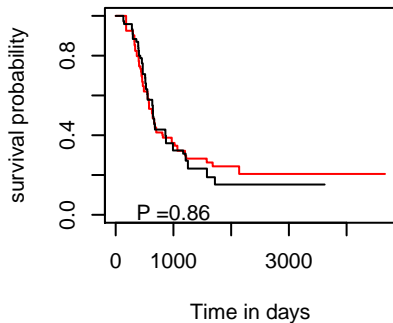**DSS hsa-mir-5001**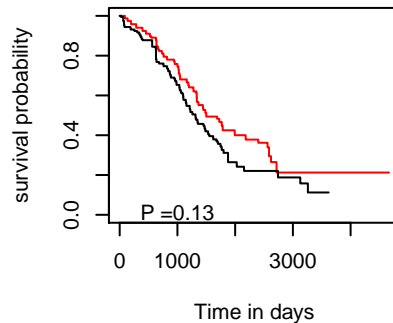**OS hsa-mir-589**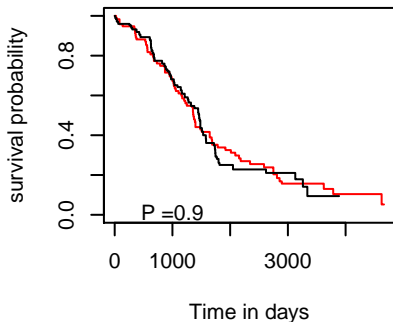**PFI hsa-mir-589**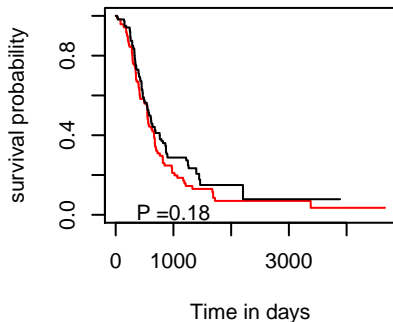**DFI hsa-mir-589**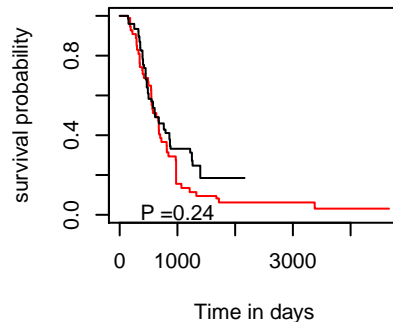**DSS hsa-mir-589**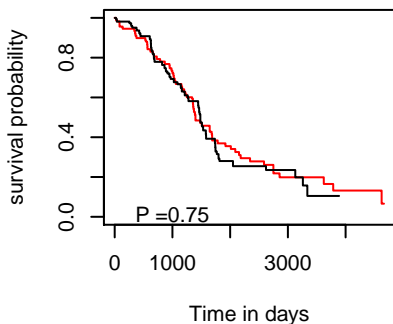**OS hsa-mir-6890**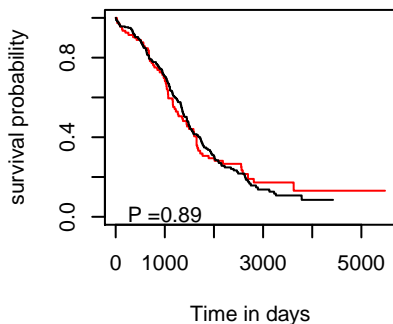**PFI hsa-mir-6890**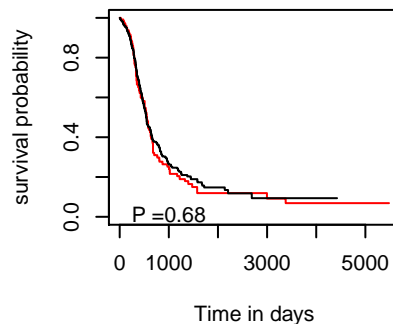

**DFI hsa-mir-6890**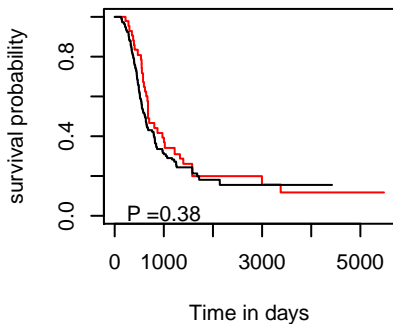**DSS hsa-mir-6890**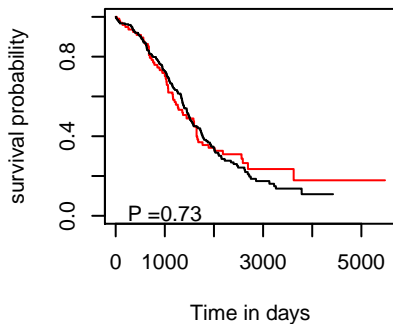**OS hsa-mir-375**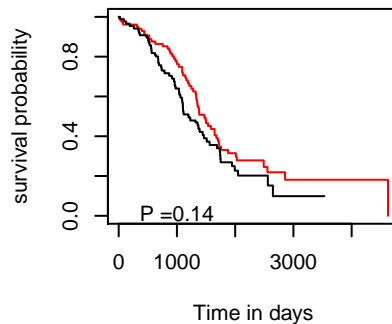**PFI hsa-mir-375**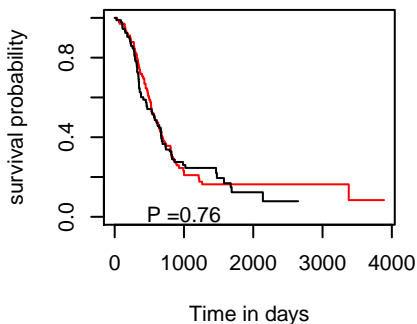**DFI hsa-mir-375**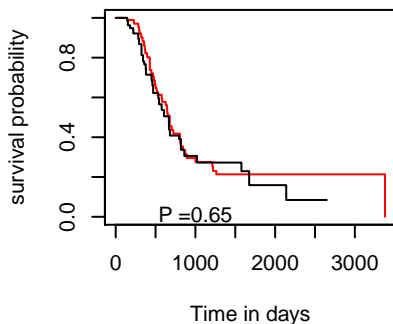**DSS hsa-mir-375**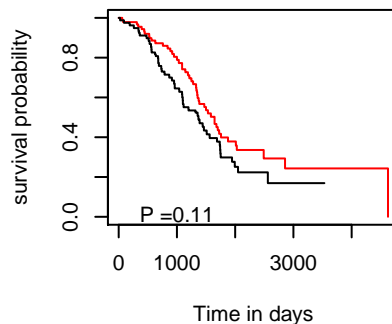**OS hsa-mir-6810**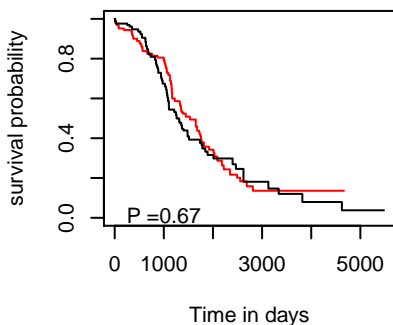**PFI hsa-mir-6810**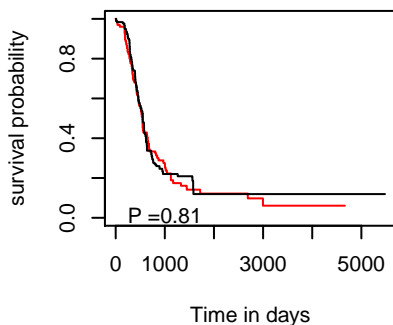**DFI hsa-mir-6810**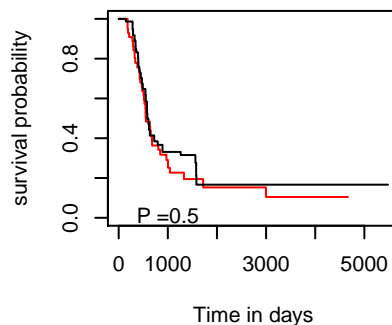

**DSS hsa-mir-6810**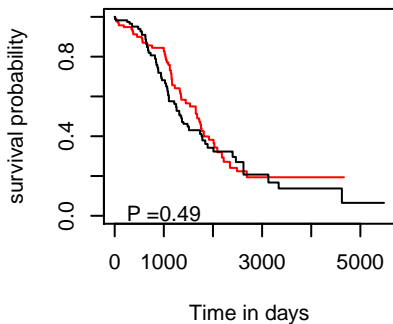**OS hsa-mir-6874**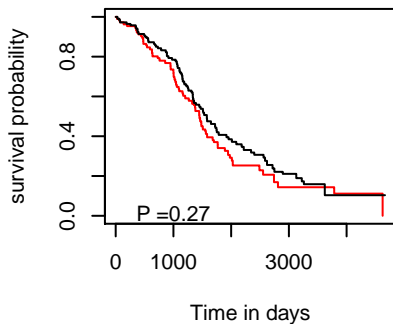**PFI hsa-mir-6874**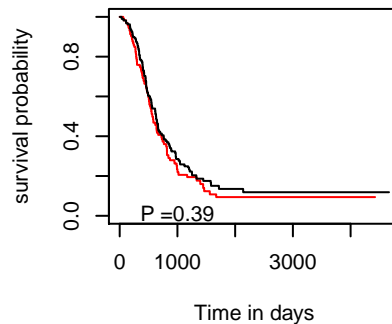**DFI hsa-mir-6874**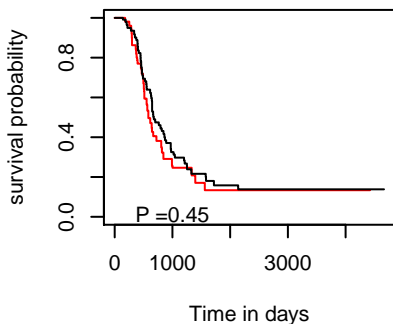**DSS hsa-mir-6874**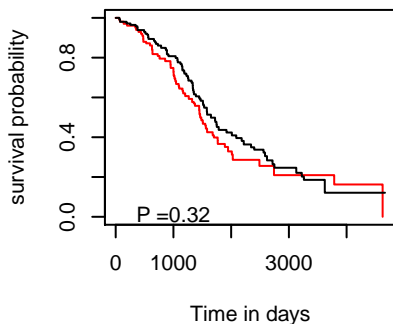**OS hsa-mir-372**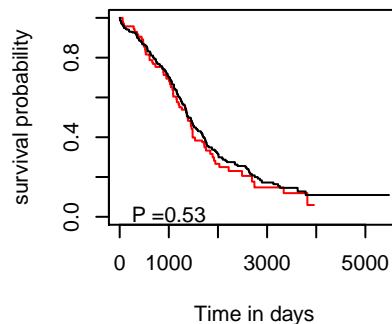**PFI hsa-mir-372**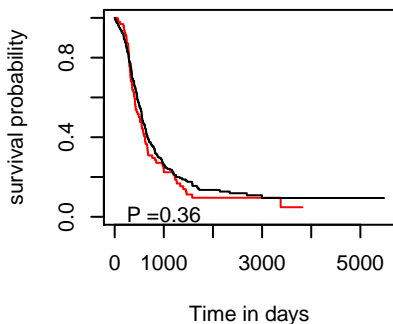**DFI hsa-mir-372**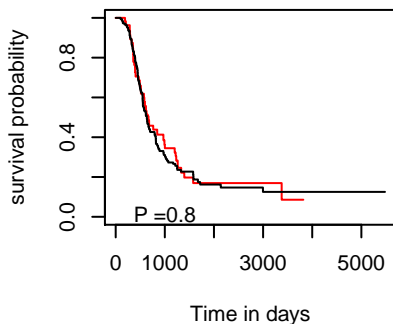**DSS hsa-mir-372**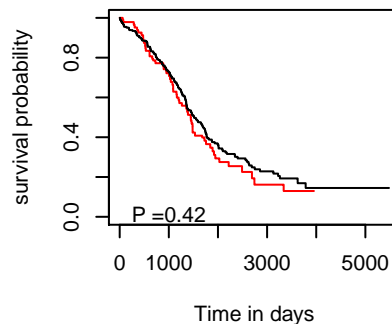

**OS hsa-mir-937**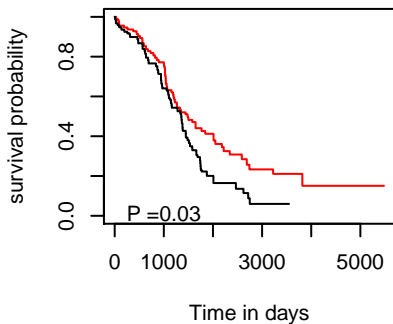**PFI hsa-mir-937**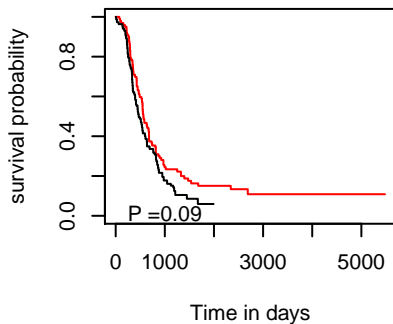**DFI hsa-mir-937**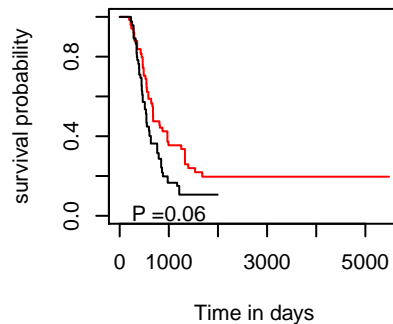**DSS hsa-mir-937**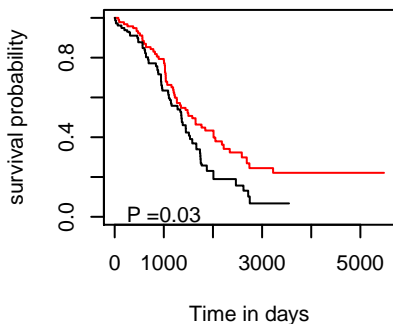**OS hsa-mir-935**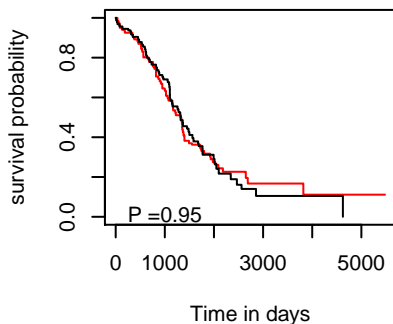**PFI hsa-mir-935**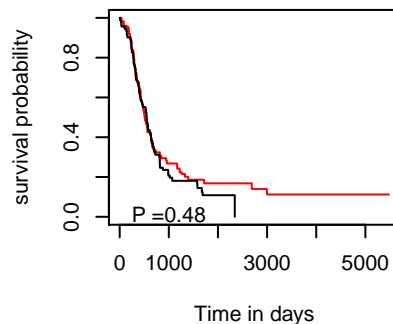**DFI hsa-mir-935**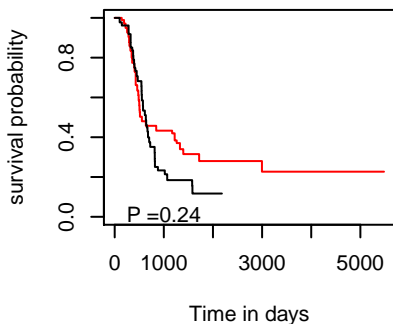**DSS hsa-mir-935**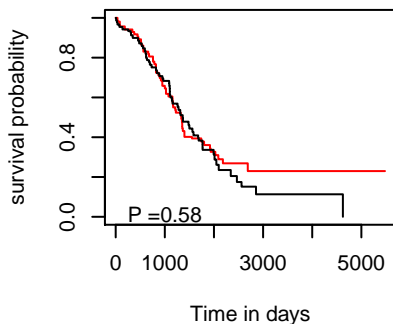**OS hsa-mir-99b**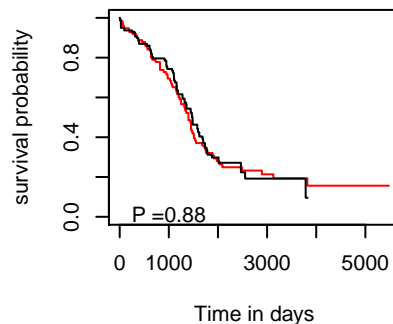

**PFI hsa-mir-99b**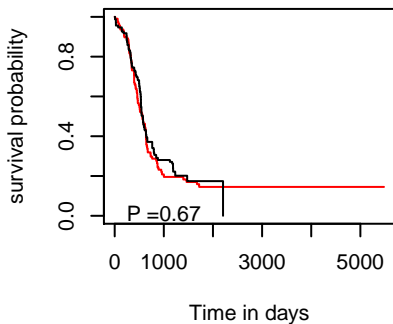**DFI hsa-mir-99b**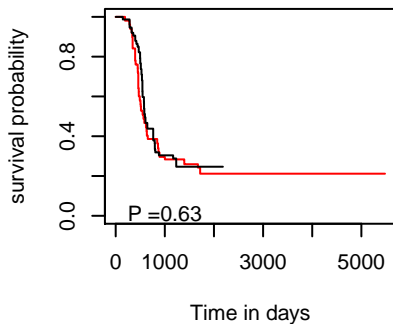**DSS hsa-mir-99b**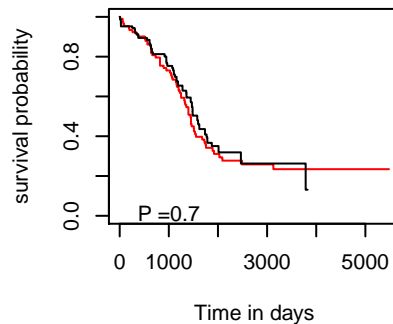**OS hsa-mir-30b**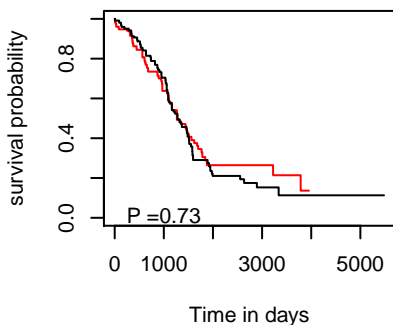**PFI hsa-mir-30b**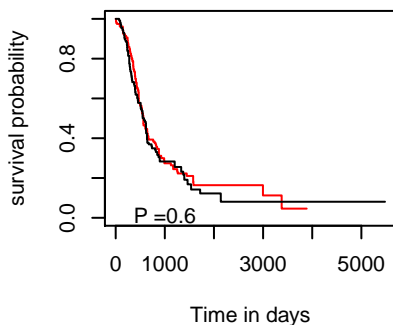**DFI hsa-mir-30b**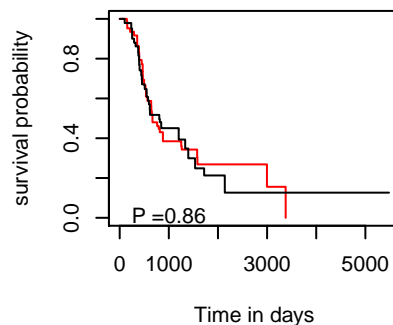**DSS hsa-mir-30b**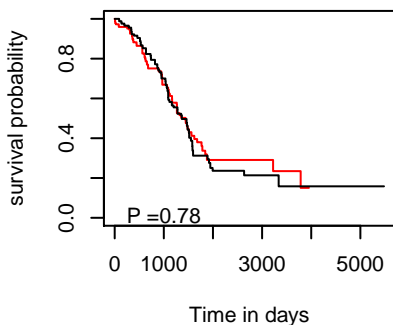**OS hsa-mir-30d**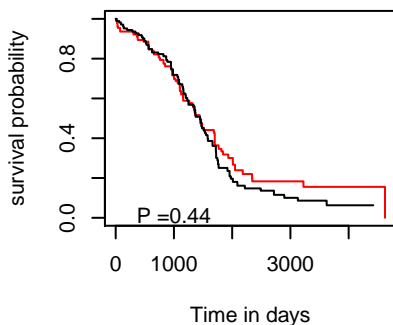**PFI hsa-mir-30d**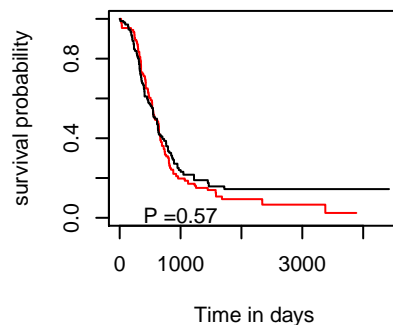

**DFI hsa-mir-30d**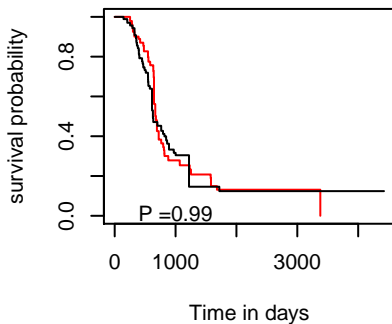**DSS hsa-mir-30d**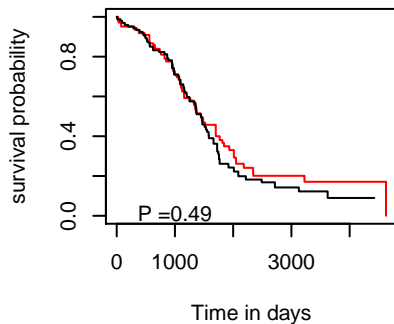**OS hsa-mir-3610**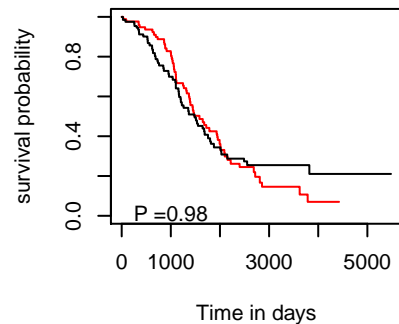**PFI hsa-mir-3610**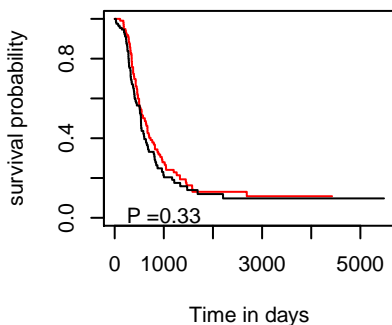**DFI hsa-mir-3610**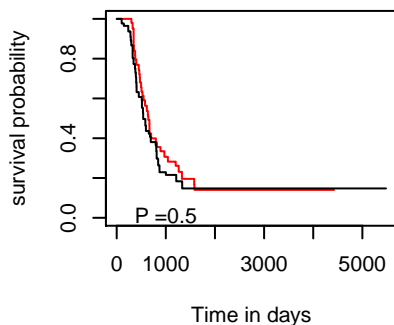**DSS hsa-mir-3610**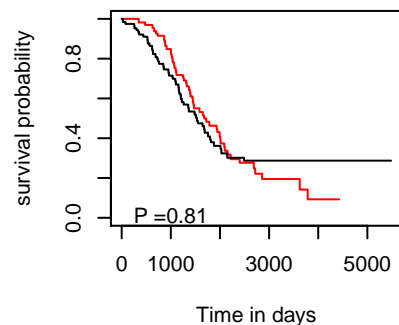**OS hsa-mir-3691**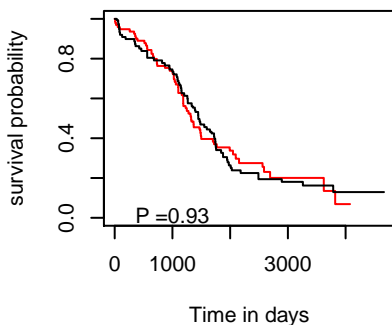**PFI hsa-mir-3691**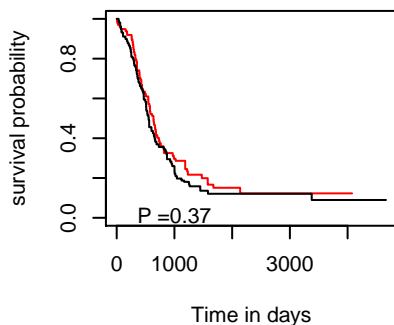**DFI hsa-mir-3691**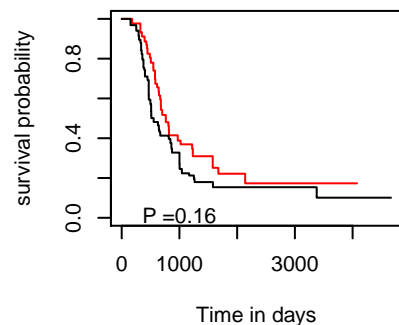

**DSS hsa-mir-3691**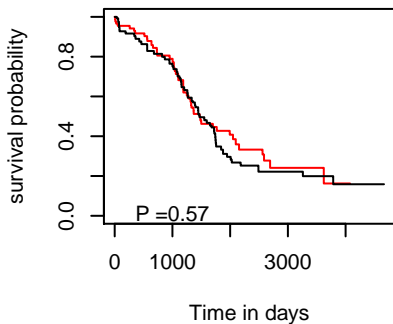**OS hsa-mir-4664**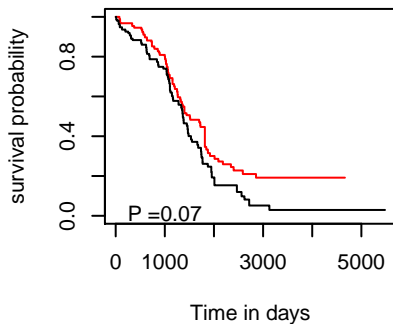**PFI hsa-mir-4664**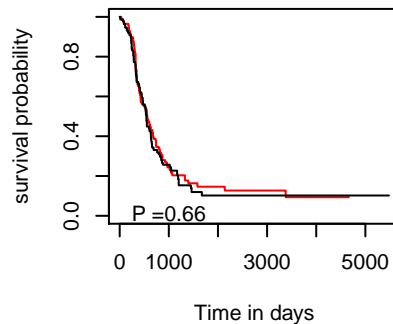**DFI hsa-mir-4664**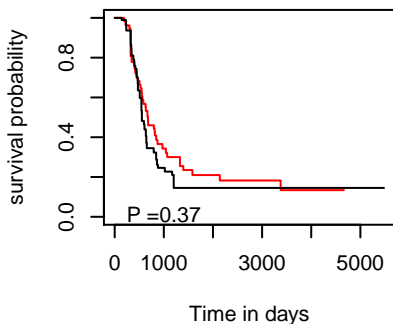**DSS hsa-mir-4664**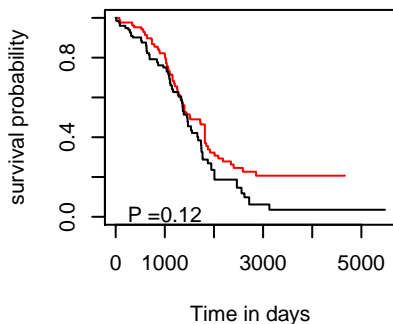**OS hsa-mir-6846**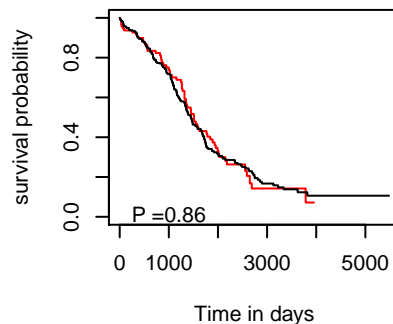**PFI hsa-mir-6846**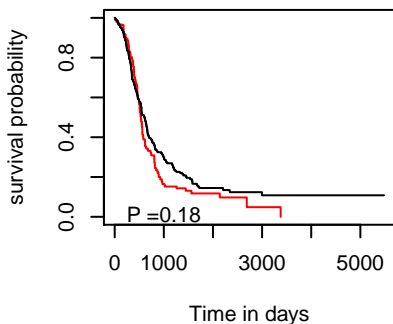**DFI hsa-mir-6846**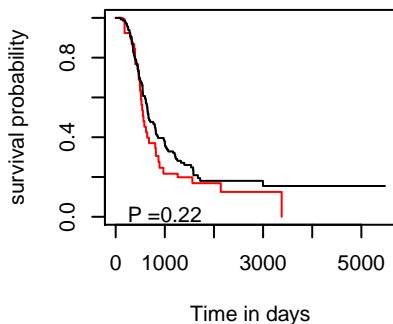**DSS hsa-mir-6846**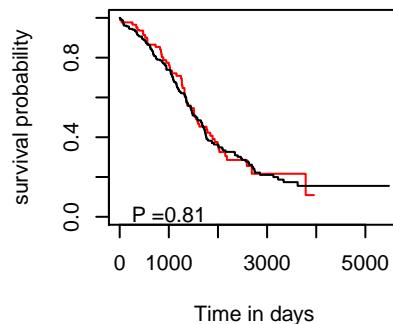

**OS hsa-mir-5703**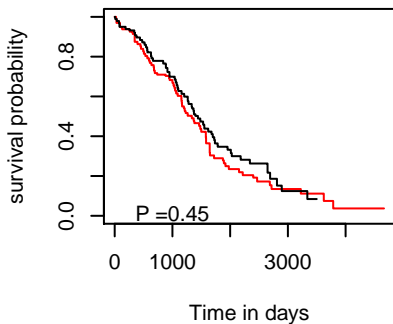**PFI hsa-mir-5703**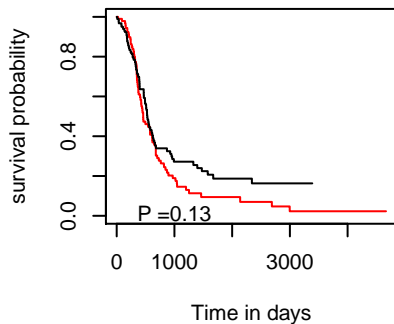**DFI hsa-mir-5703**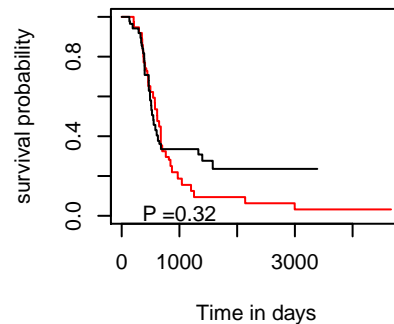**DSS hsa-mir-5703**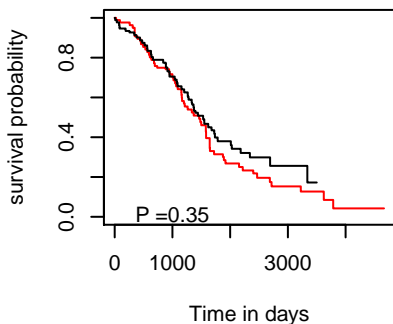**OS hsa-let-7e**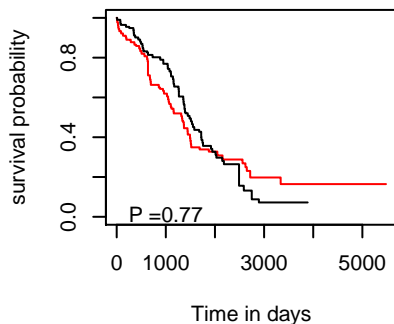**PFI hsa-let-7e**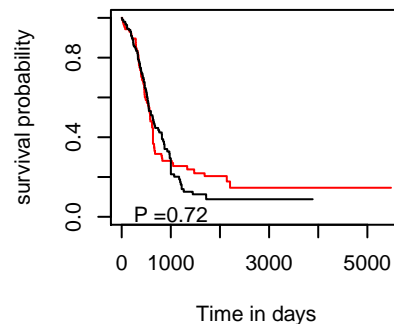**DFI hsa-let-7e**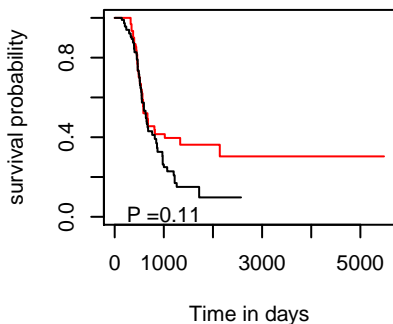**DSS hsa-let-7e**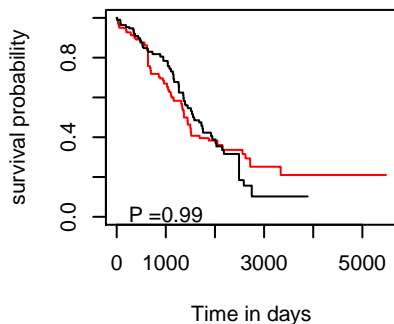**OS hsa-mir-150**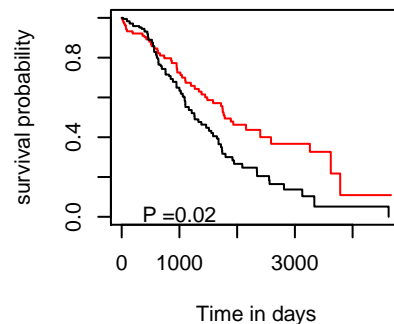



**DFI hsa-mir-3926-1**

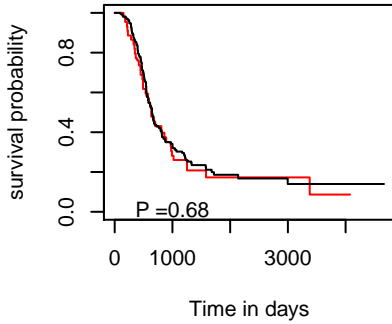

**DSS hsa-mir-3926-1**

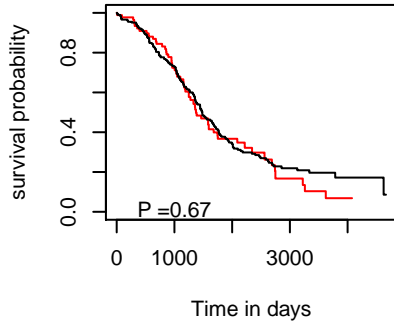

**OS hsa-mir-3926-2**

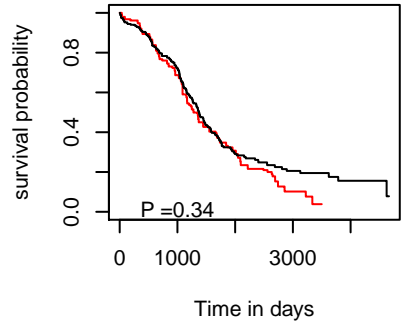

**PFI hsa-mir-3926-2**

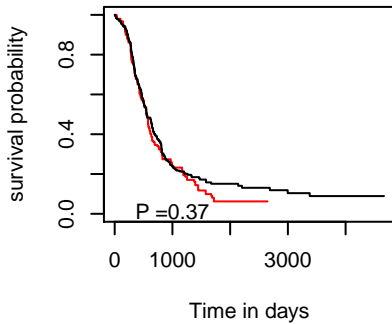

**DFI hsa-mir-3926-2**

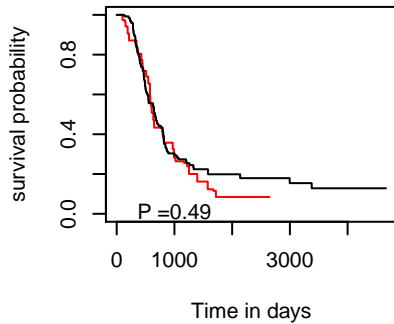

**DSS hsa-mir-3926-2**

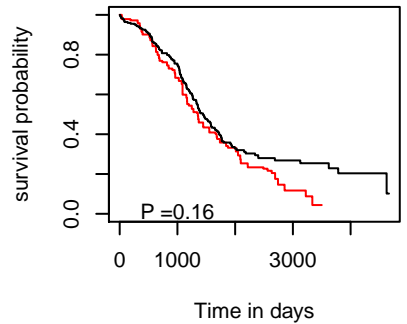

**OS hsa-mir-4286**

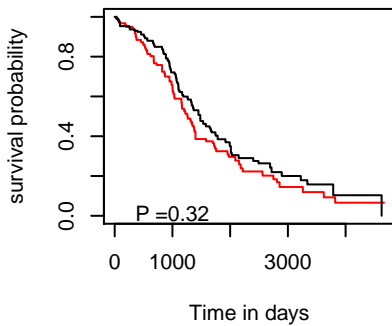

**PFI hsa-mir-4286**

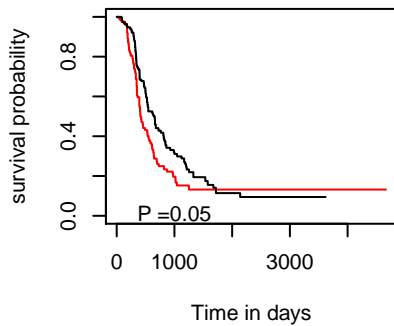

**DFI hsa-mir-4286**

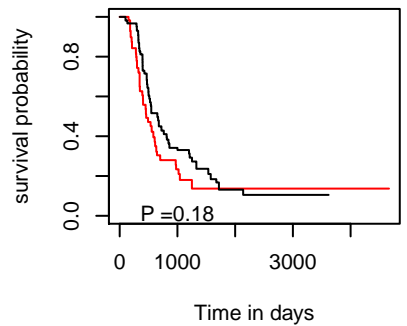

**DSS hsa-mir-4286**

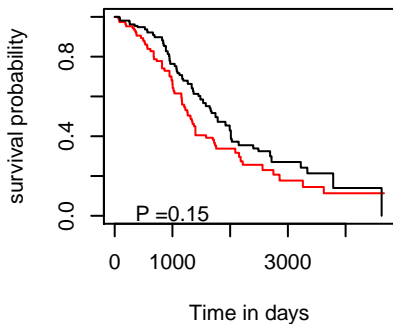

**OS hsa-mir-4660**

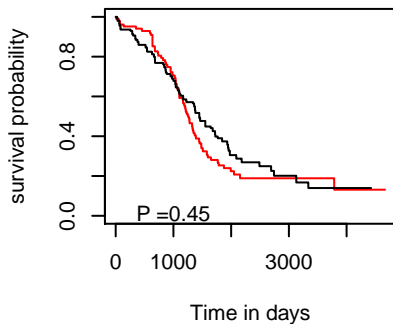

**PFI hsa-mir-4660**

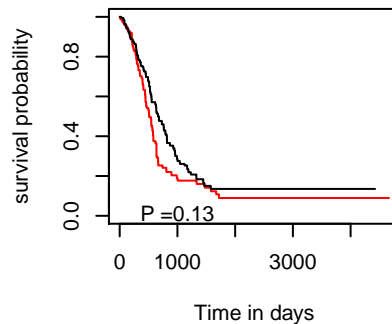

**DFI hsa-mir-4660**

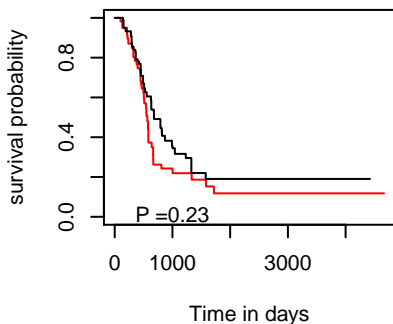

**DSS hsa-mir-4660**

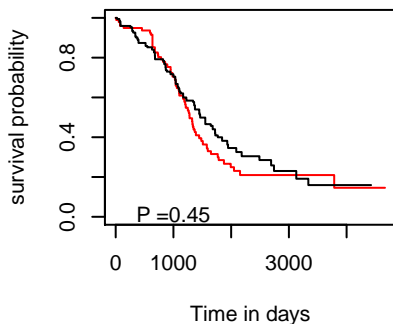

**OS hsa-mir-4787**

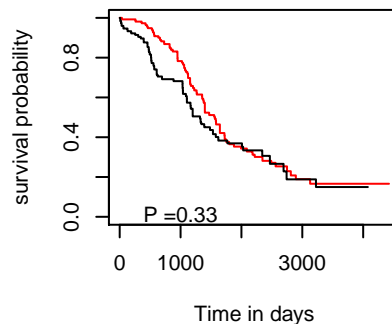

**PFI hsa-mir-4787**

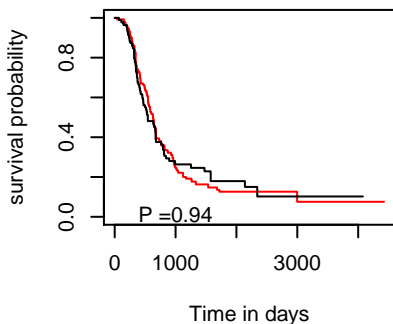

**DFI hsa-mir-4787**

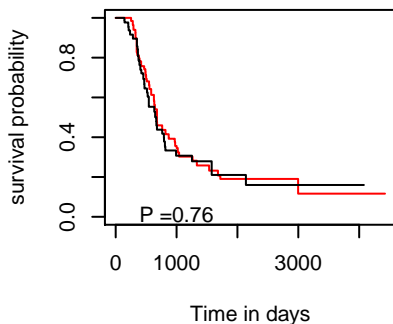

**DSS hsa-mir-4787**

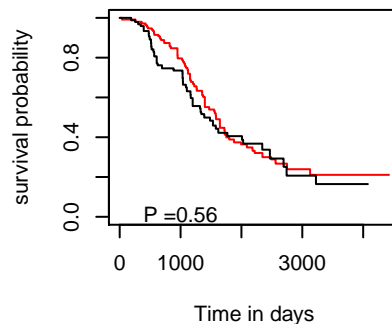

**OS hsa-mir-598**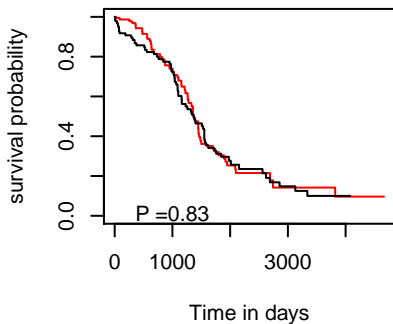**PFI hsa-mir-598**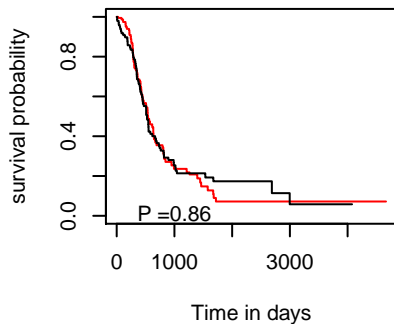**DFI hsa-mir-598**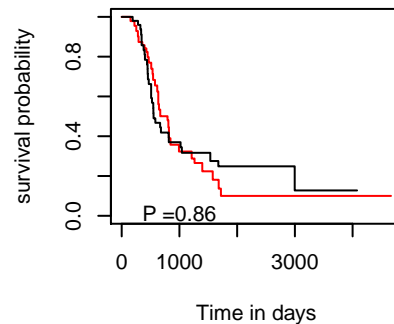**DSS hsa-mir-598**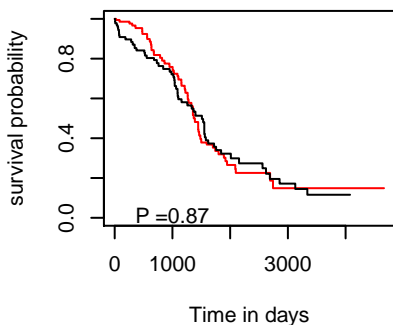**OS hsa-mir-6836**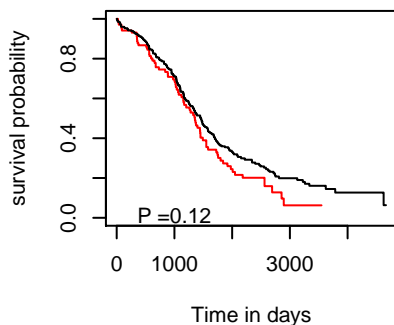**PFI hsa-mir-6836**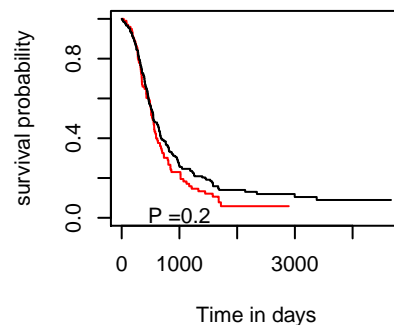**DFI hsa-mir-6836**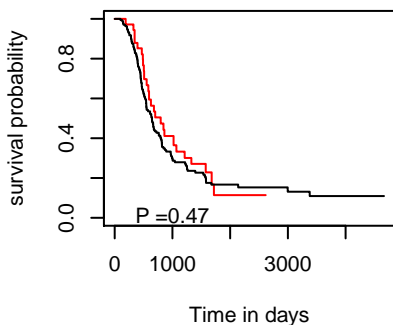**DSS hsa-mir-6836**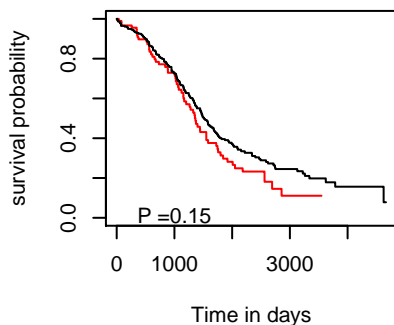**OS hsa-mir-6843**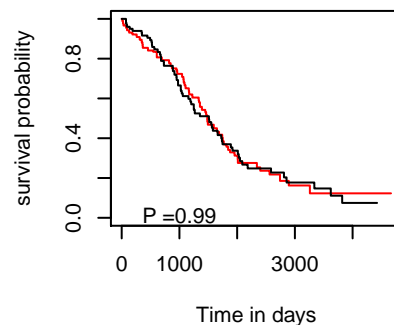

**PFI hsa-mir-6843**

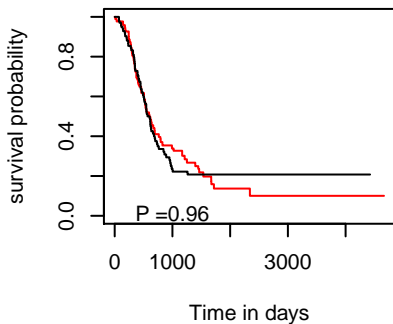

**DFI hsa-mir-6843**

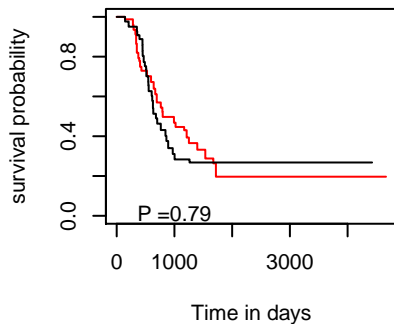

**DSS hsa-mir-6843**

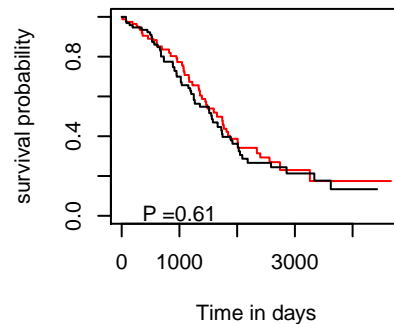

**OS hsa-mir-6845**

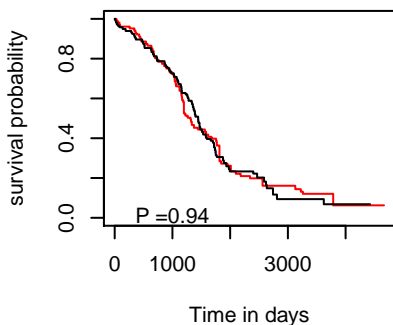

**PFI hsa-mir-6845**

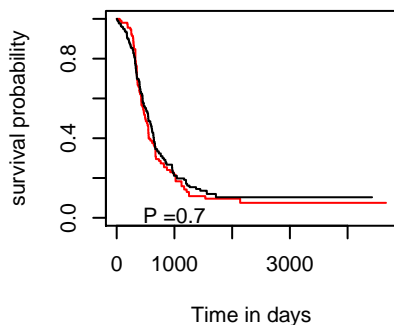

**DFI hsa-mir-6845**

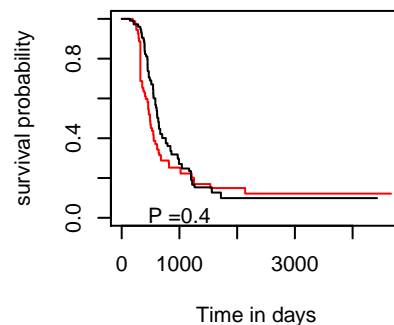

**DSS hsa-mir-6845**

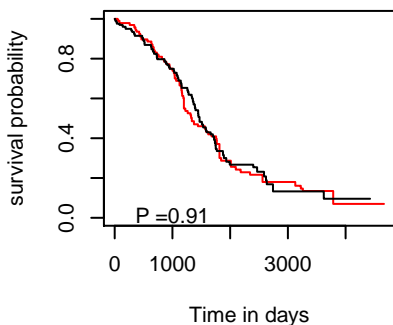

**OS hsa-mir-6847**

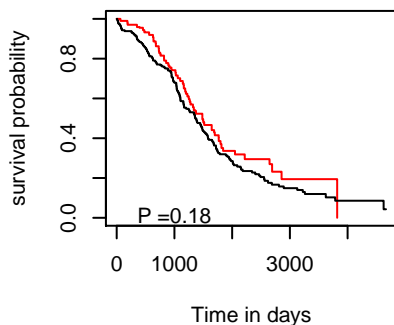

**PFI hsa-mir-6847**

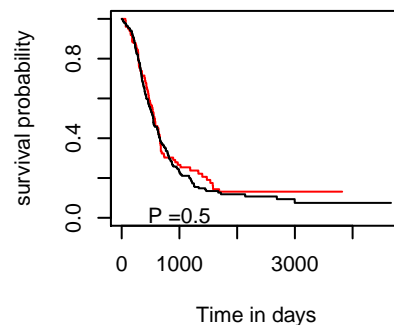

**DFI hsa-mir-6847**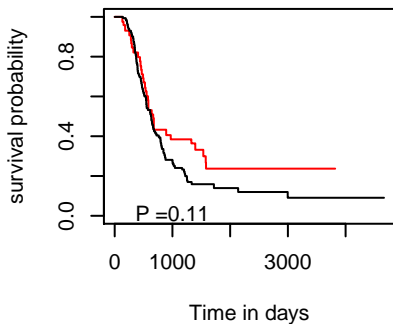**DSS hsa-mir-6847**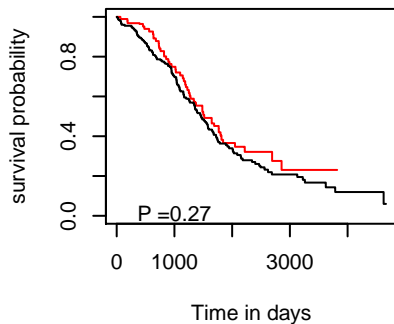**OS hsa-mir-4453**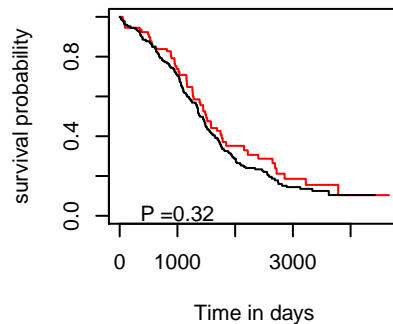**PFI hsa-mir-4453**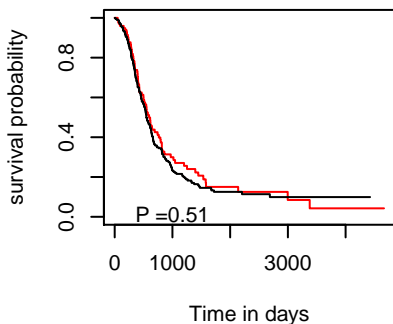**DFI hsa-mir-4453**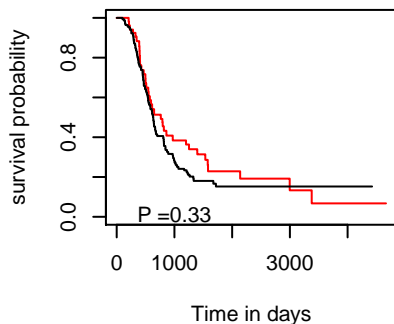**DSS hsa-mir-4453**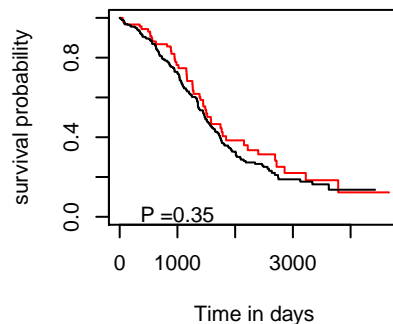**OS hsa-mir-3191**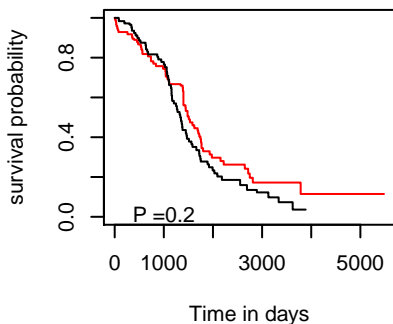**PFI hsa-mir-3191**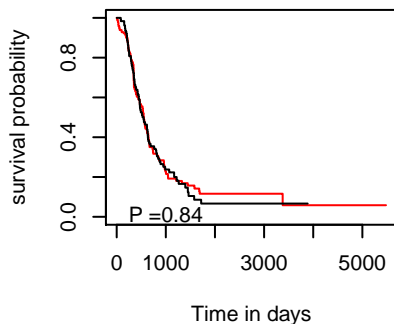**DFI hsa-mir-3191**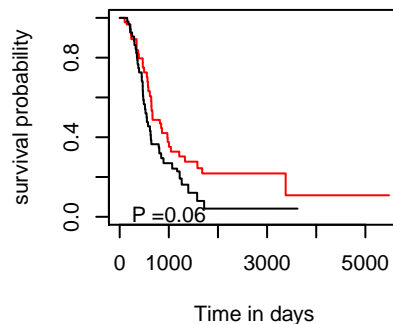

**DSS hsa-mir-3191**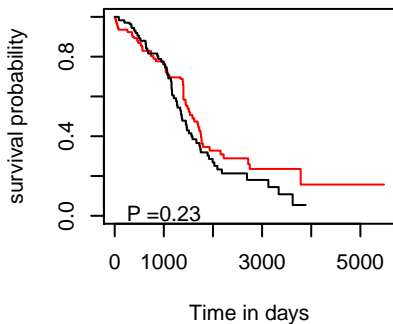**OS hsa-mir-6798**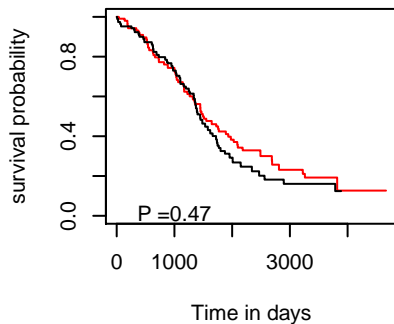**PFI hsa-mir-6798**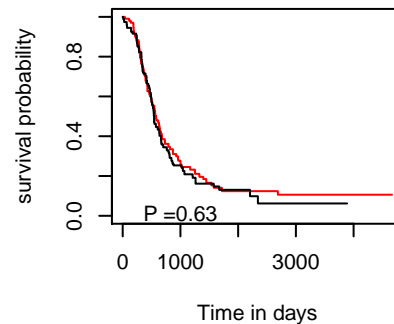**DFI hsa-mir-6798**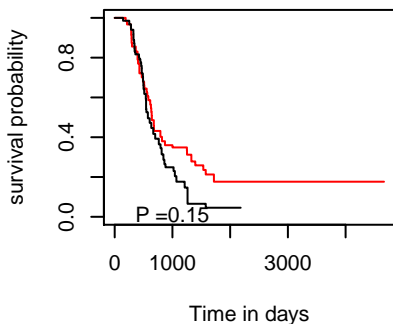**DSS hsa-mir-6798**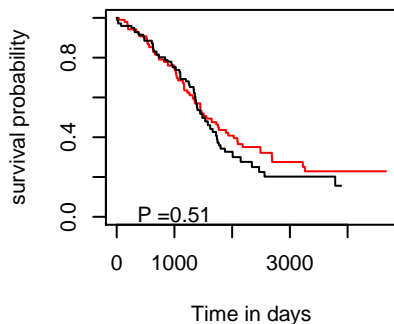**OS hsa-mir-4749**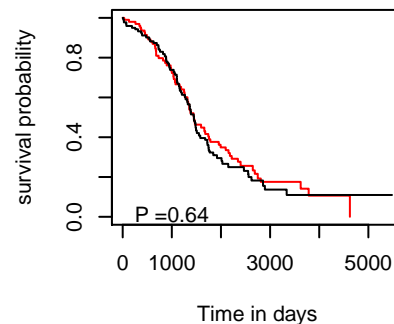**PFI hsa-mir-4749**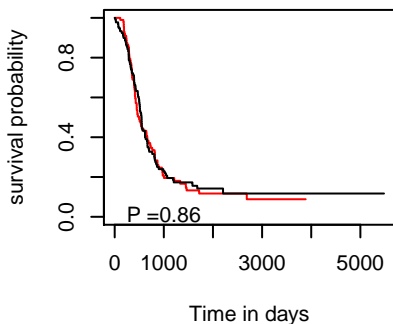**DFI hsa-mir-4749**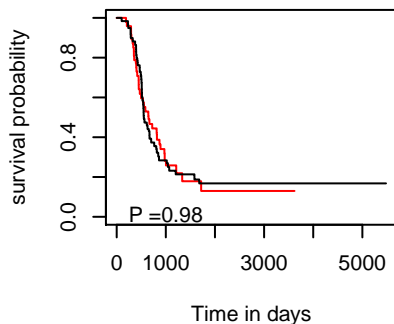**DSS hsa-mir-4749**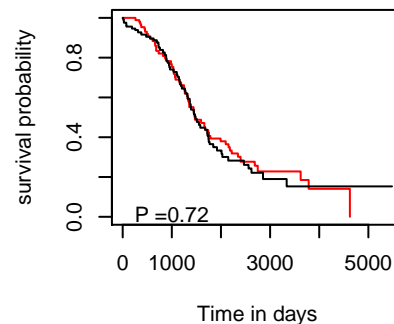

**OS hsa-mir-149**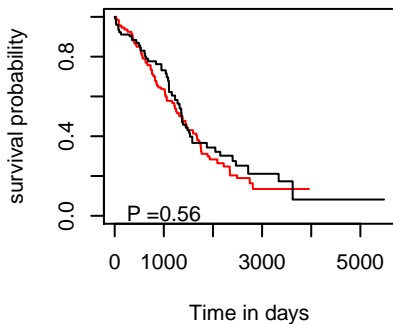**PFI hsa-mir-149**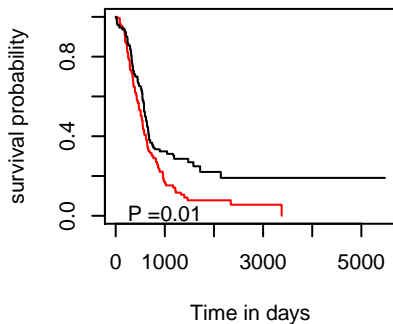**DFI hsa-mir-149**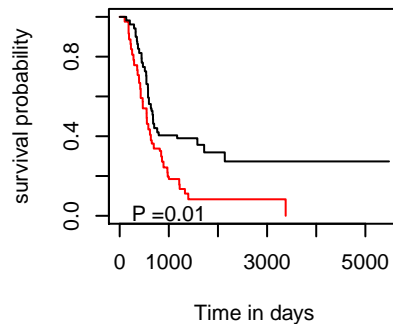**DSS hsa-mir-149**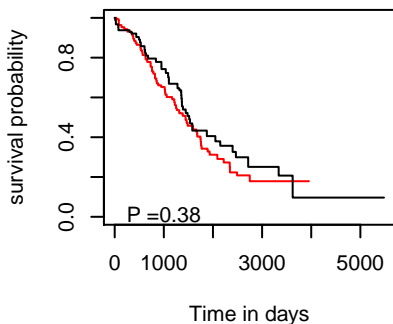**OS hsa-mir-320a**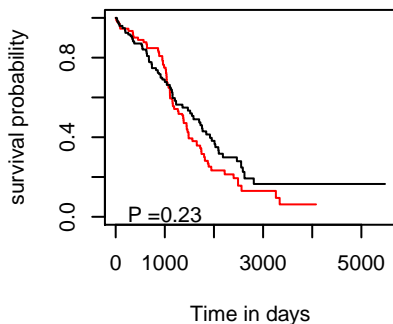**PFI hsa-mir-320a**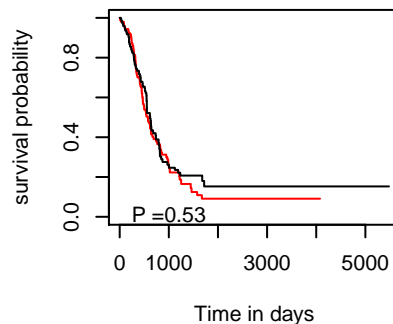**DFI hsa-mir-320a**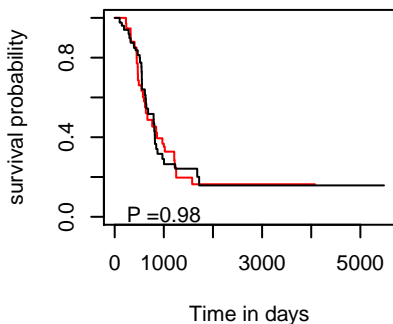**DSS hsa-mir-320a**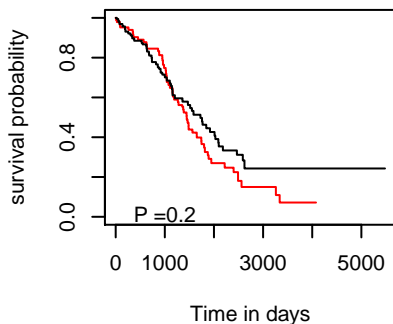**OS hsa-mir-5680**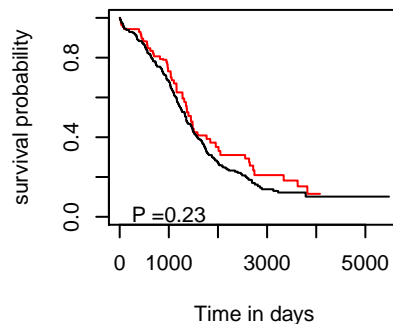

**PFI hsa-mir-5680**

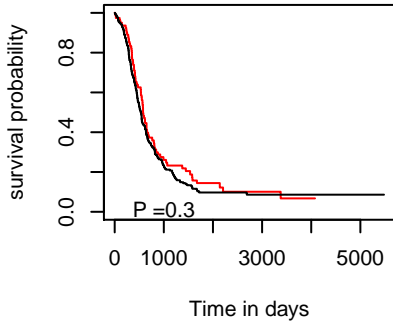

**DFI hsa-mir-5680**

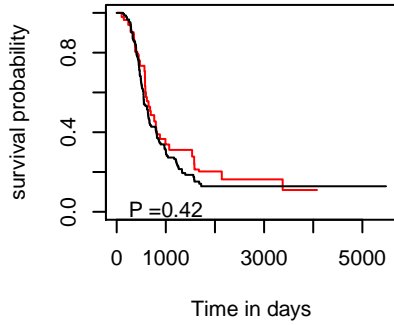

**DSS hsa-mir-5680**

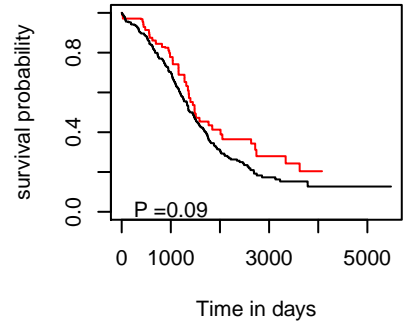

Supplement: MOESM23 [file 41598_2022_7628_MOESM23_ESM.pdf]
