# Supplementary material for: New Thinking on Read-Aloud.
Source: Springer Nature journal article supplement (doi:10.1038/s41598-022-07628-z), 2001-01-01

# Computing microRNA-gene interaction networks in pan-cancer using miRDriver

Banabithi Bose, Matthew Moravec, and Serdar Bozdog

# Supplemental Figure S15

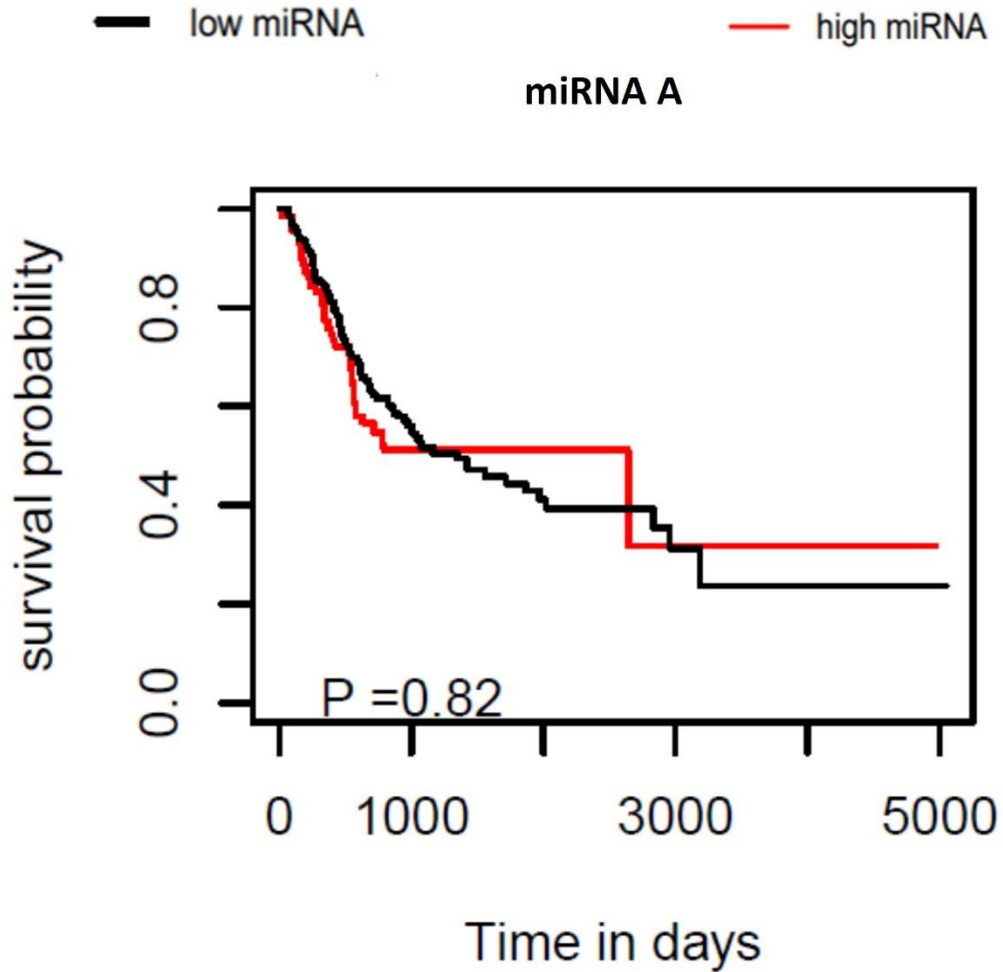

The *Adjusted Kaplan-Meier* survival plots for the computed miRNAs in high and low miRNA expression patient groups.

## Supplemental Figure S15

## Cancer Type: PAAD

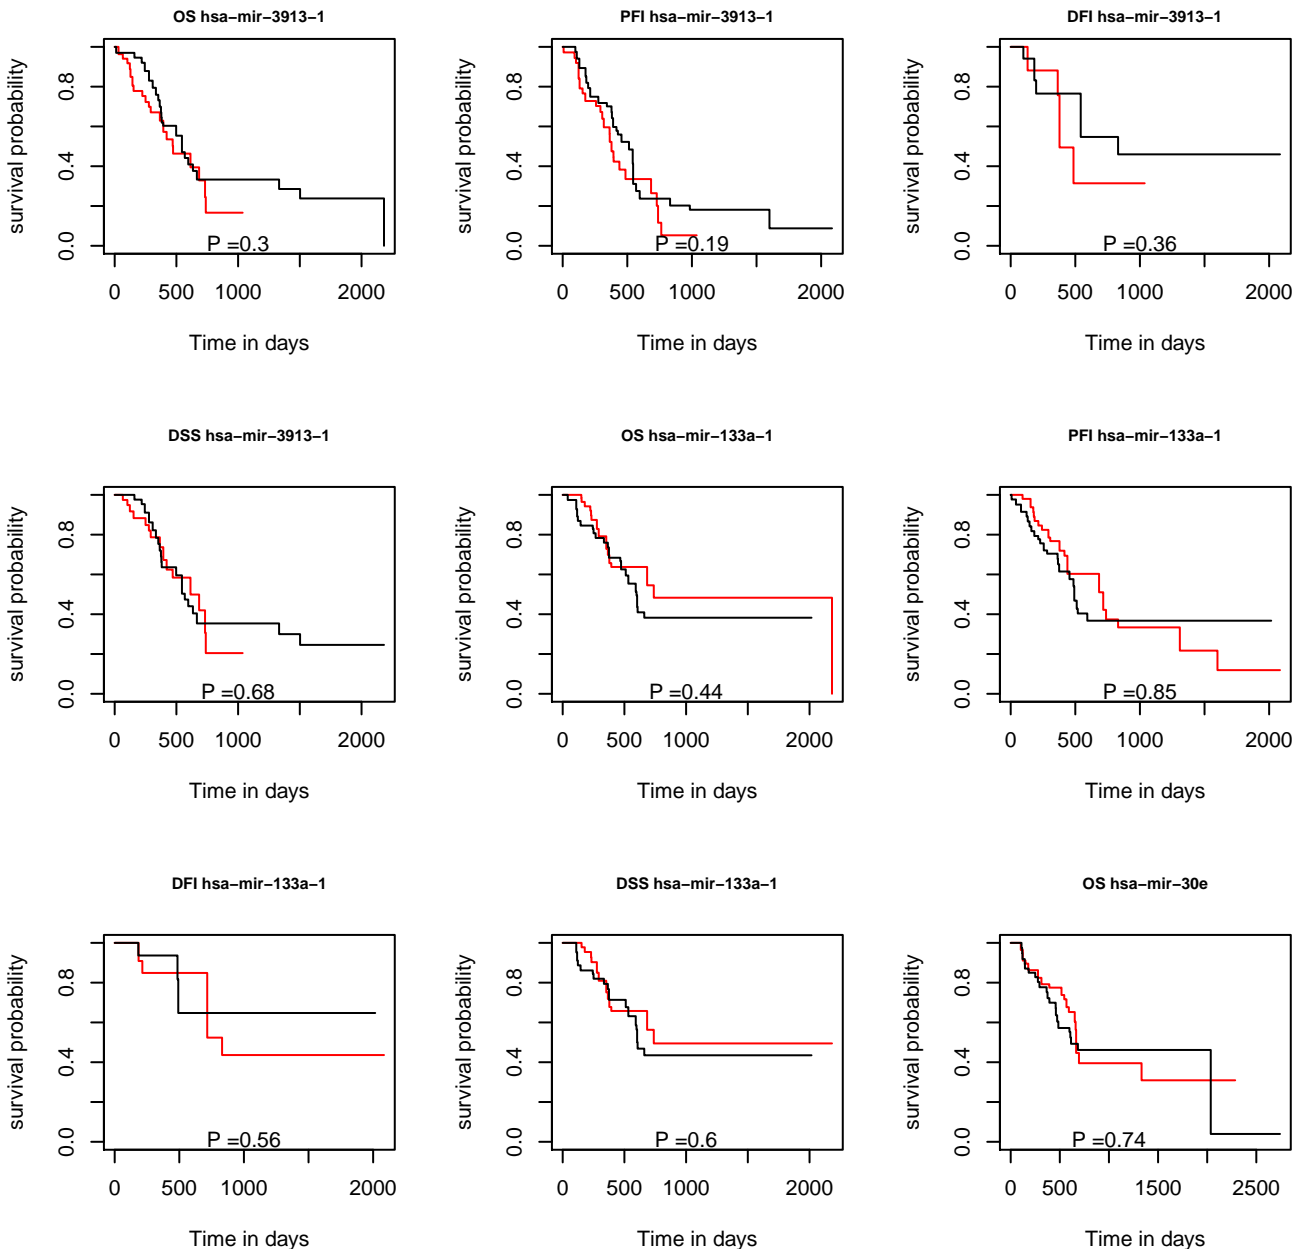

**PFI hsa-mir-30e**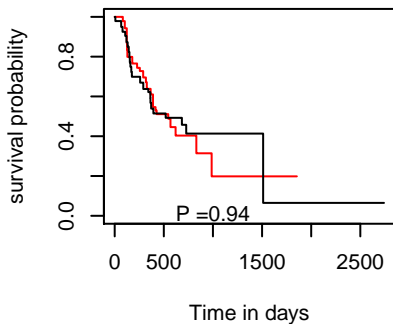**DFI hsa-mir-30e**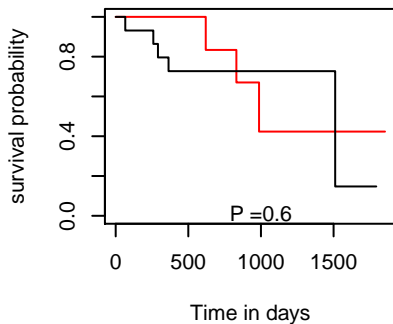**DSS hsa-mir-30e**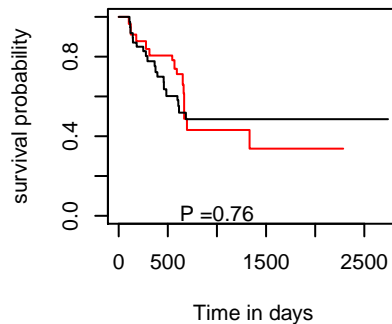**OS hsa-mir-491**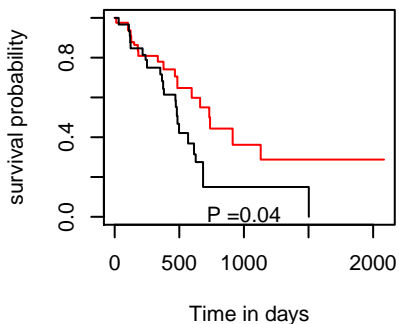**PFI hsa-mir-491**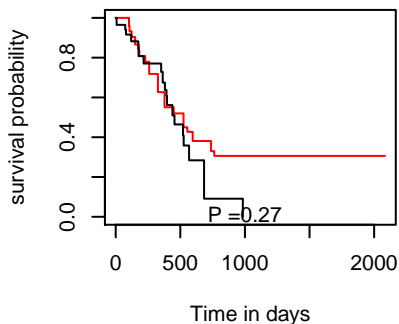**DFI hsa-mir-491**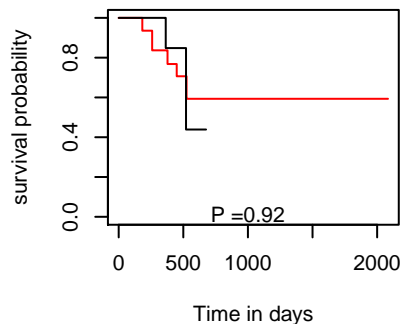**DSS hsa-mir-491**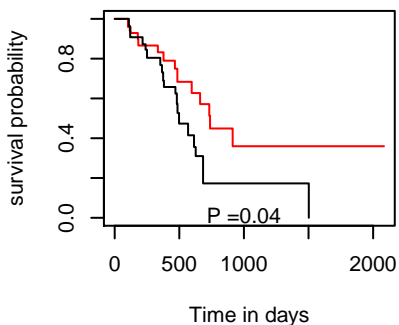**OS hsa-mir-5699**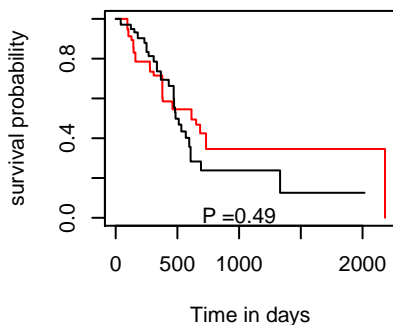**PFI hsa-mir-5699**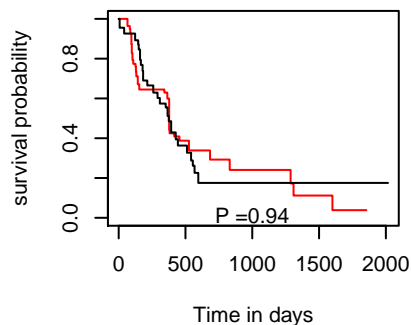

**DFI hsa-mir-5699**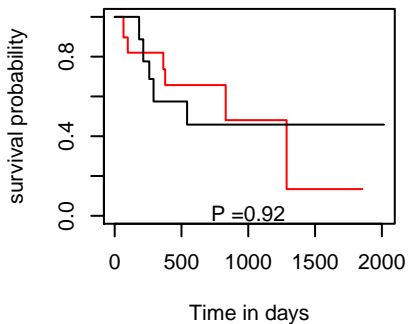**DSS hsa-mir-5699**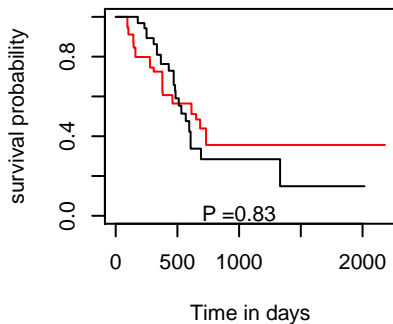**OS hsa-mir-653**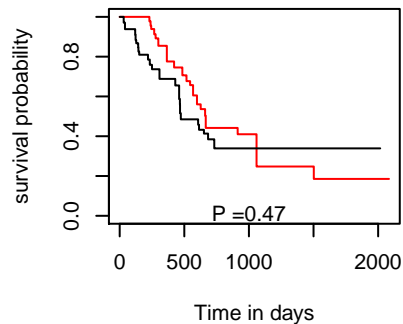**PFI hsa-mir-653**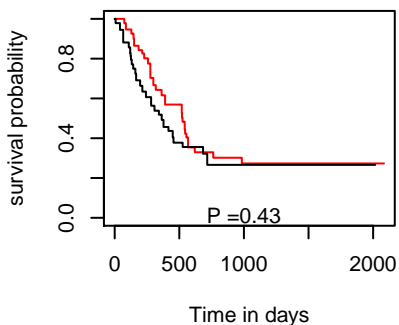**DFI hsa-mir-653**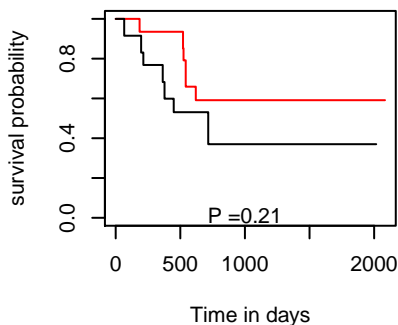**DSS hsa-mir-653**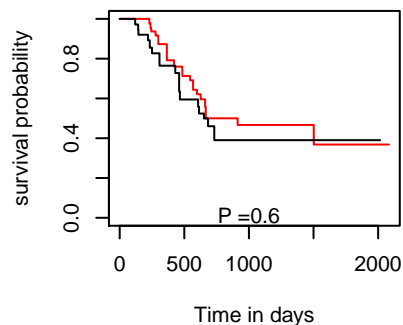**OS hsa-mir-320c-1**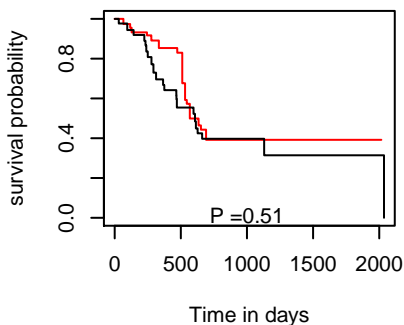**PFI hsa-mir-320c-1**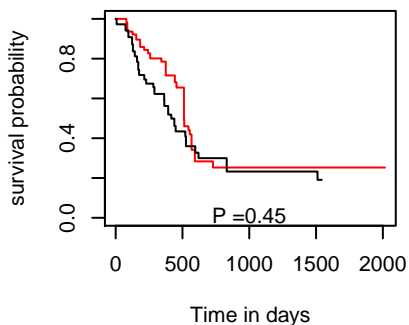**DFI hsa-mir-320c-1**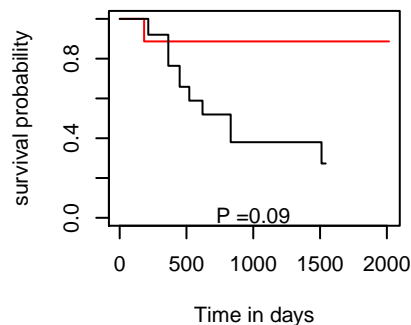

DSS hsa-mir-320c-1

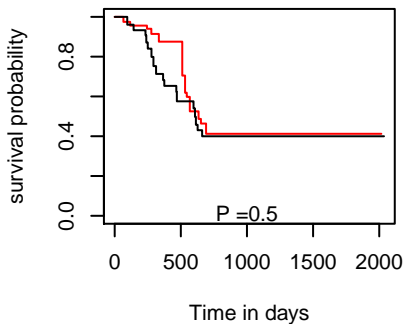

OS hsa-mir-4746

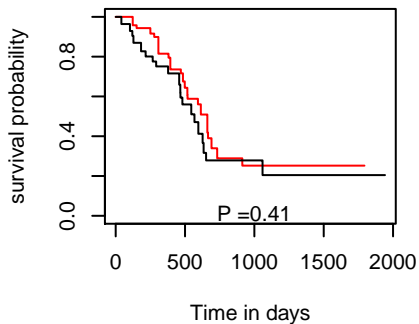

PFI hsa-mir-4746

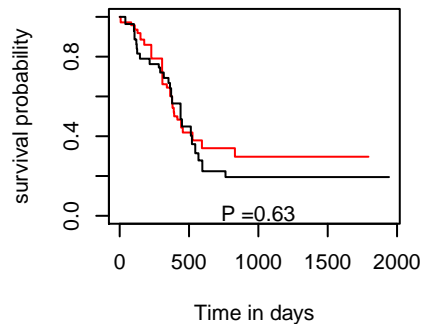

DFI hsa-mir-4746

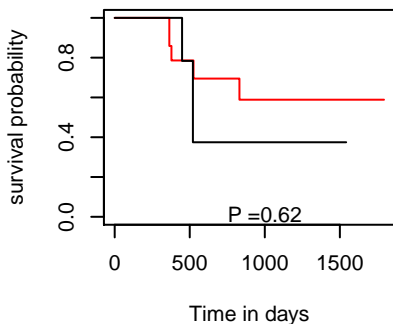

DSS hsa-mir-4746

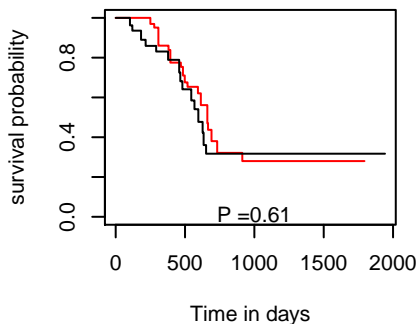

OS hsa-mir-489

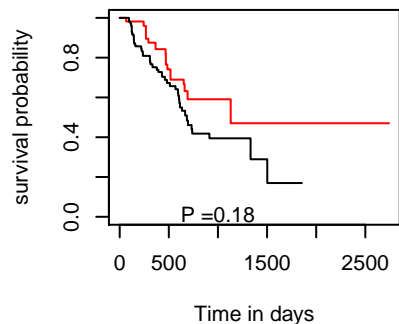

PFI hsa-mir-489

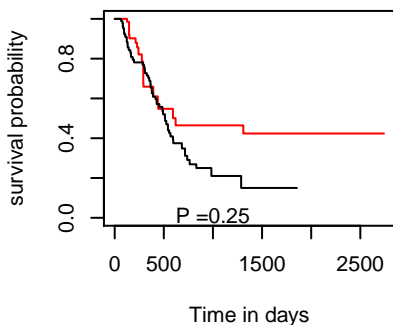

DFI hsa-mir-489

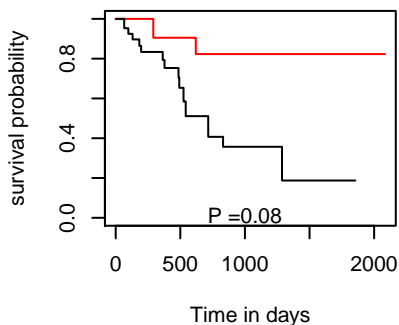

DSS hsa-mir-489

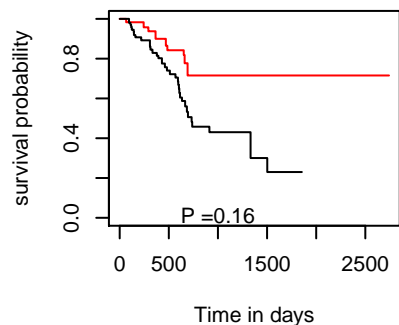

**OS hsa-mir-30c-1**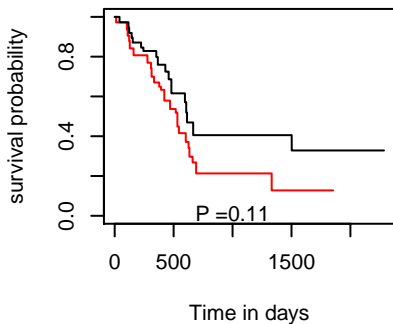**PFI hsa-mir-30c-1**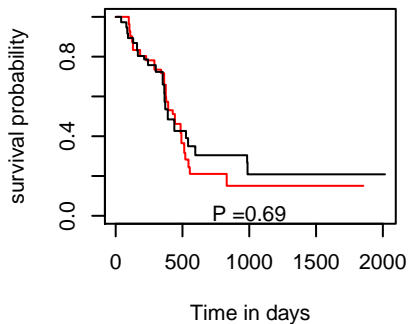**DFI hsa-mir-30c-1**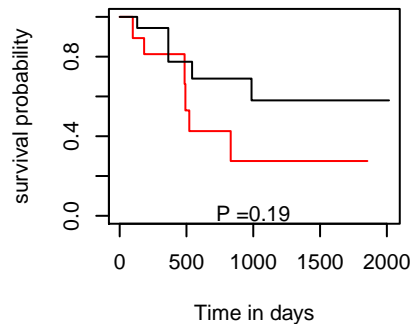**DSS hsa-mir-30c-1**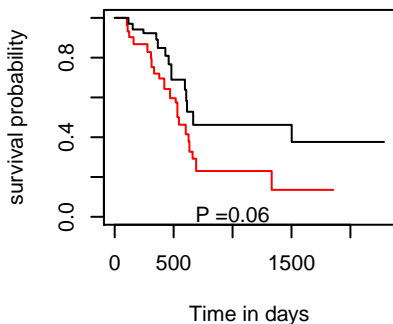**OS hsa-mir-744**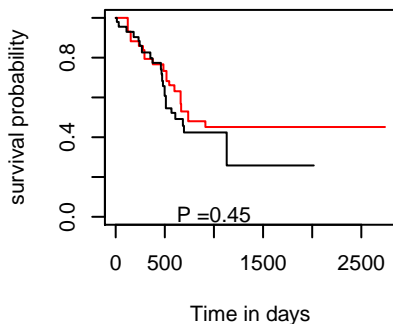**PFI hsa-mir-744**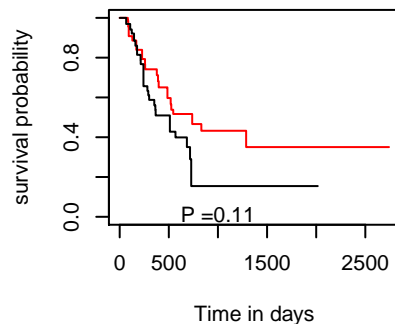**DFI hsa-mir-744**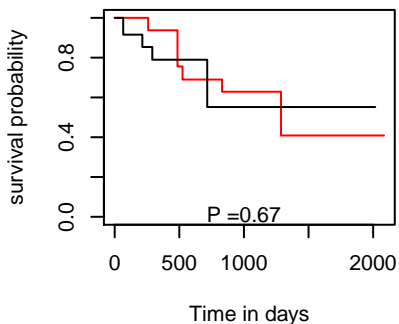**DSS hsa-mir-744**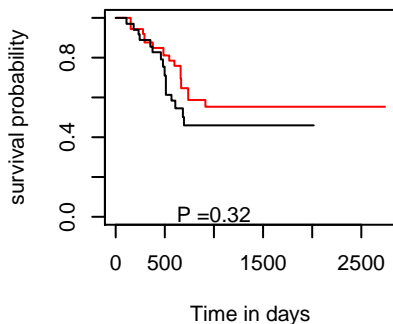**OS hsa-mir-9-2**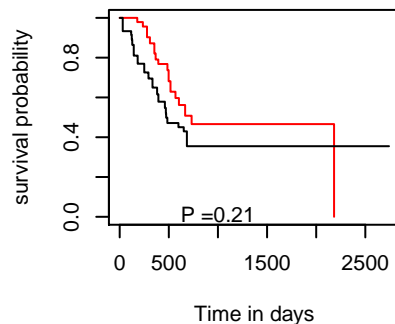

**PFI hsa-mir-9-2**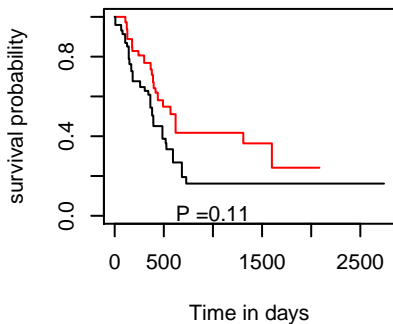**DFI hsa-mir-9-2**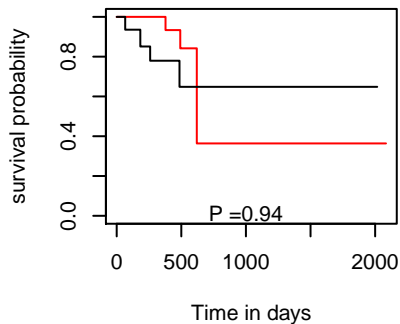**DSS hsa-mir-9-2**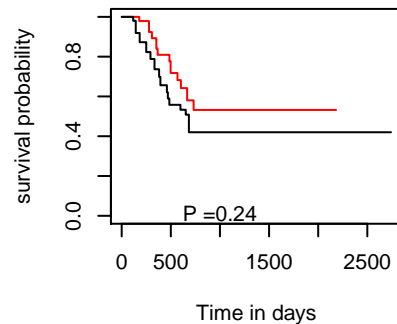**OS hsa-mir-1-2**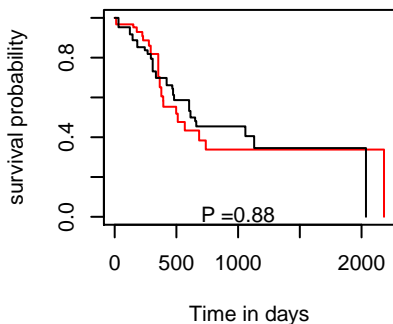**PFI hsa-mir-1-2**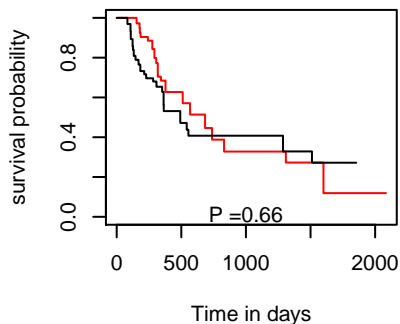**DFI hsa-mir-1-2**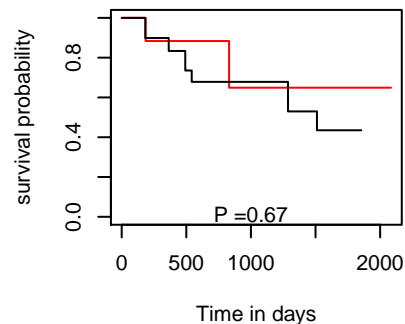**DSS hsa-mir-1-2**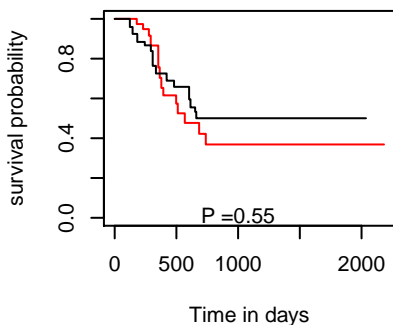**OS hsa-mir-4529**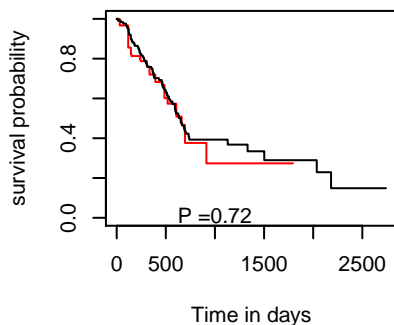**PFI hsa-mir-4529**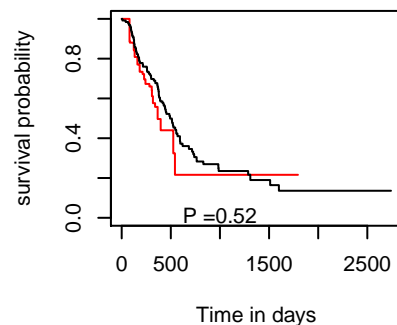

**DFI hsa-mir-4529**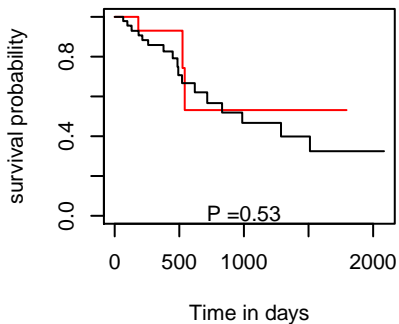**DSS hsa-mir-4529**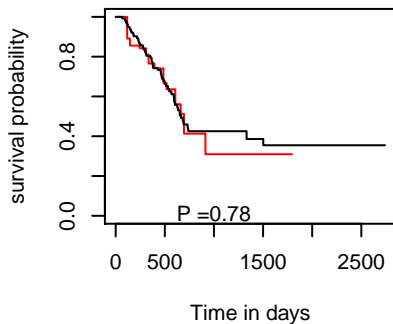**OS hsa-mir-454**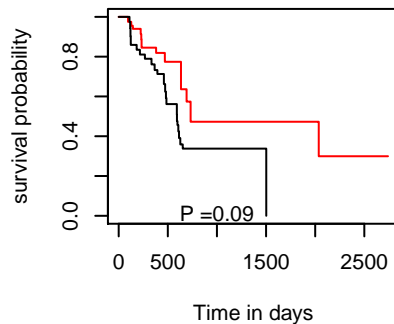**PFI hsa-mir-454**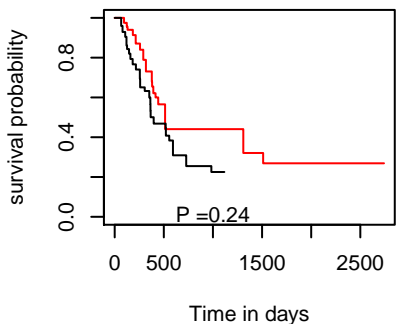**DFI hsa-mir-454**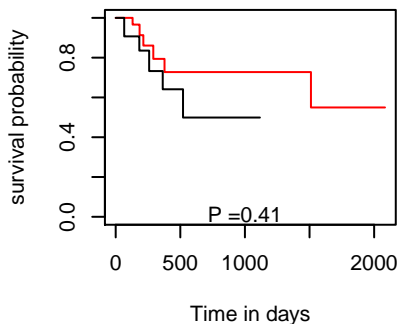**DSS hsa-mir-454**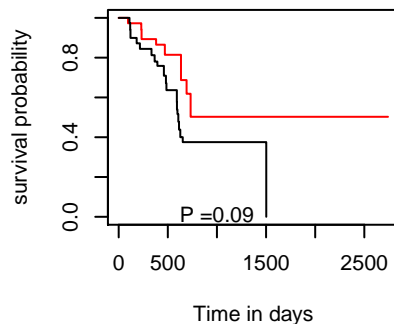**OS hsa-mir-873**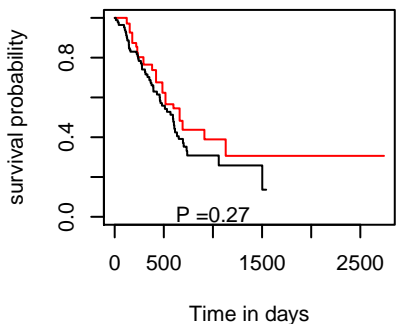**PFI hsa-mir-873**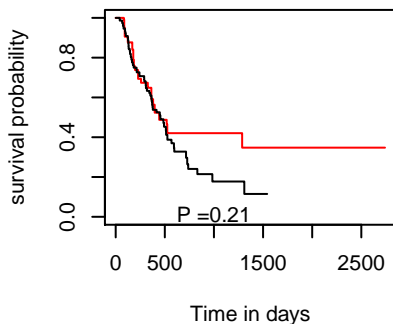**DFI hsa-mir-873**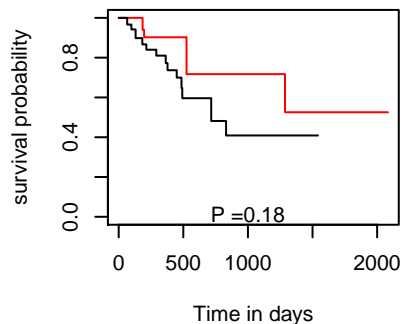

**DSS hsa-mir-873**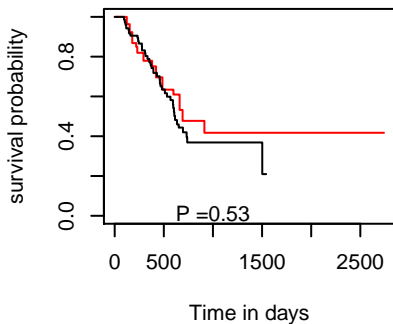**OS hsa-mir-25**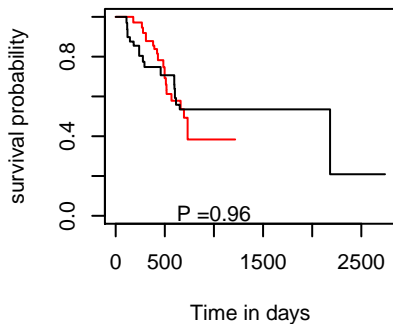**PFI hsa-mir-25**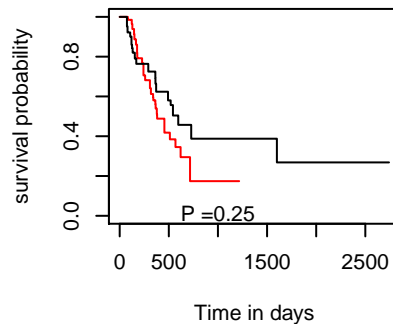**DFI hsa-mir-25**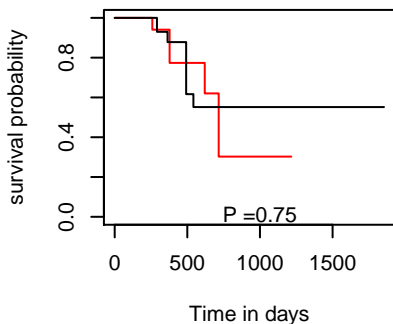**DSS hsa-mir-25**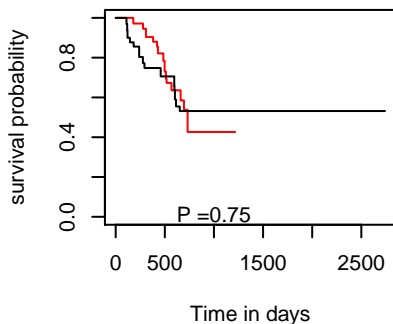**OS hsa-mir-4510**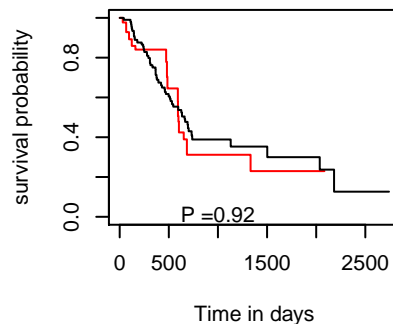**PFI hsa-mir-4510**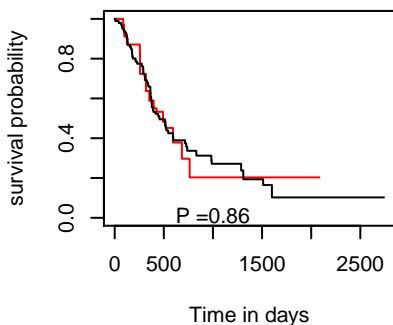**DFI hsa-mir-4510**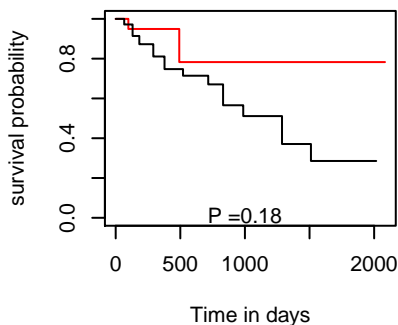**DSS hsa-mir-4510**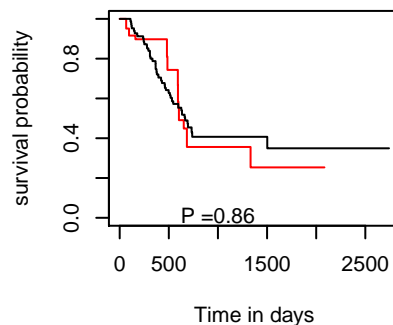

**OS hsa-mir-876**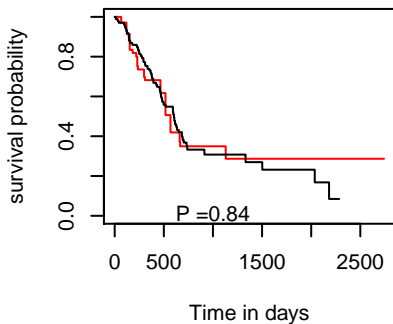**PFI hsa-mir-876**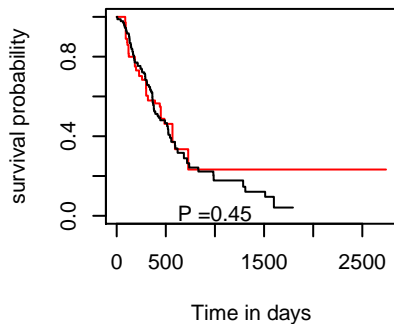**DFI hsa-mir-876**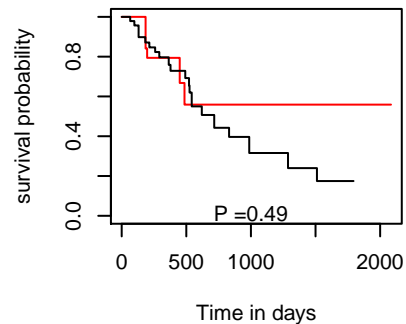**DSS hsa-mir-876**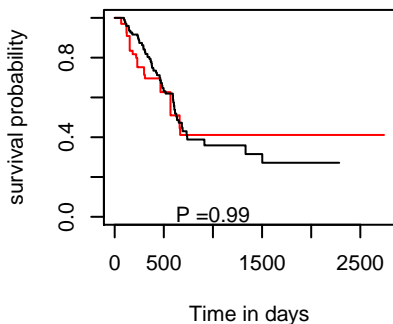**OS hsa-mir-4473**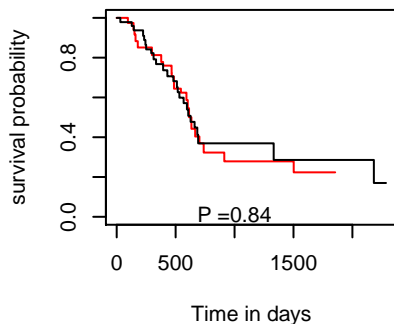**PFI hsa-mir-4473**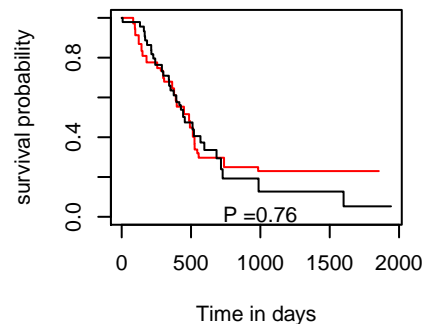**DFI hsa-mir-4473**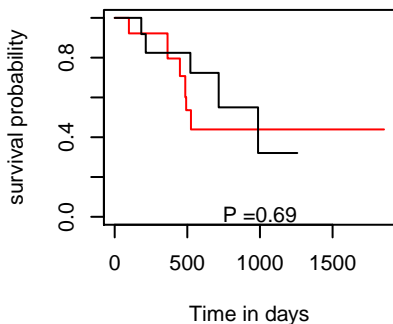**DSS hsa-mir-4473**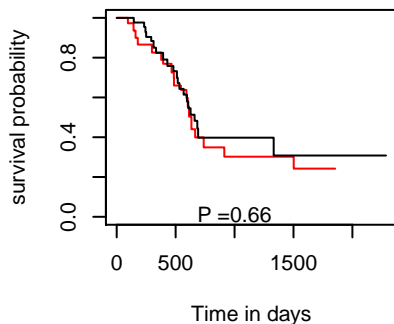**OS hsa-mir-6852**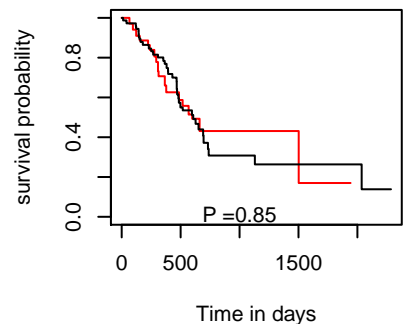

**PFI hsa-mir-6852**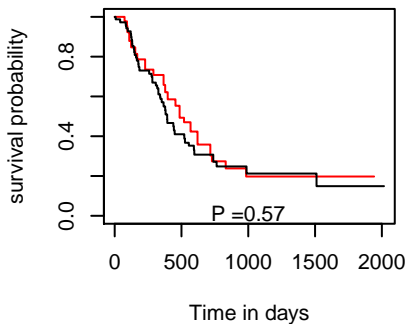**DFI hsa-mir-6852**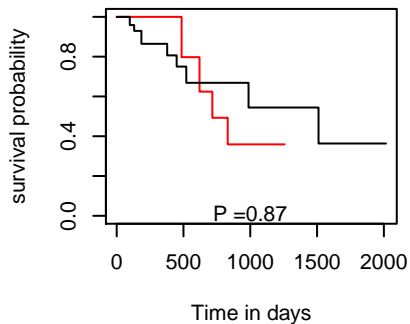**DSS hsa-mir-6852**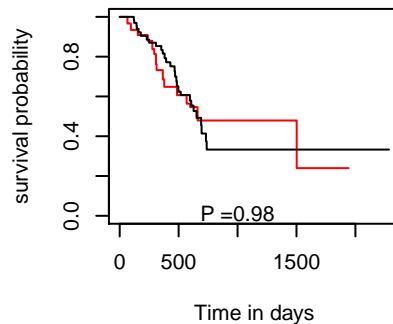**OS hsa-mir-1305**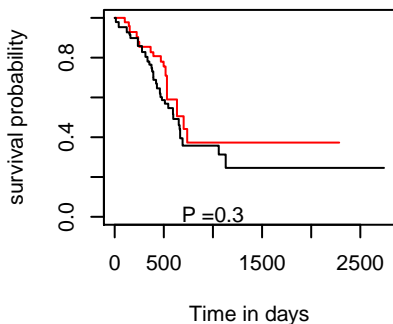**PFI hsa-mir-1305**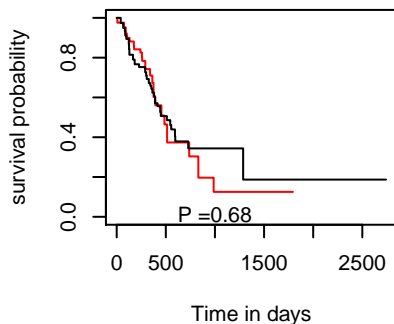**DFI hsa-mir-1305**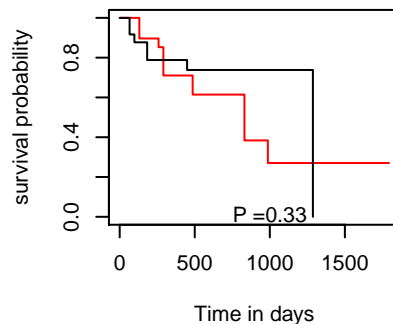**DSS hsa-mir-1305**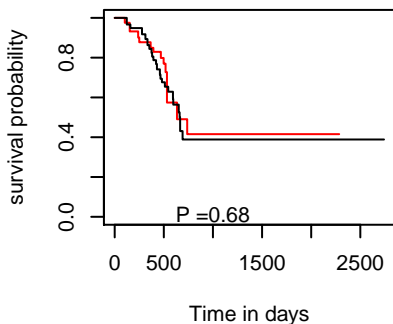**OS hsa-mir-320c-2**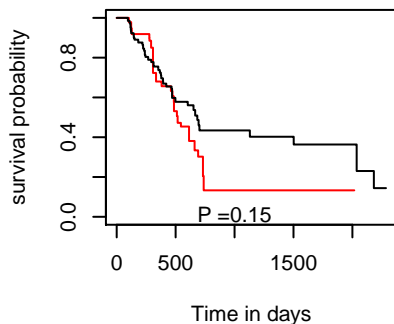**PFI hsa-mir-320c-2**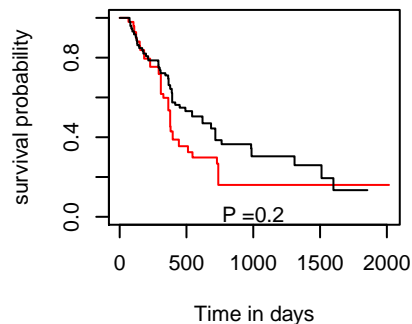

**DFI hsa-mir-320c-2**

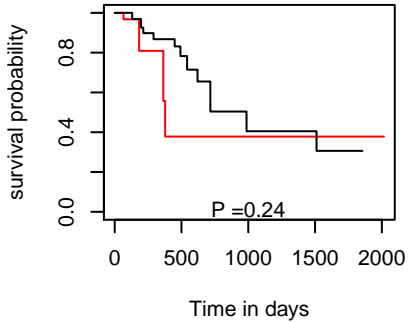

**DSS hsa-mir-320c-2**

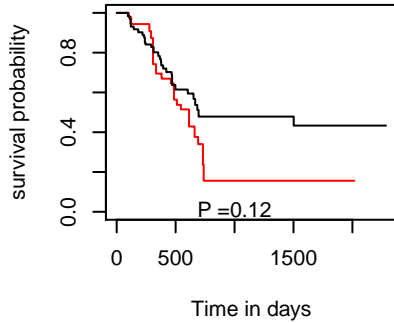

**OS hsa-mir-6720**

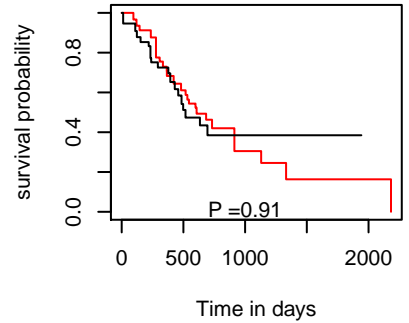

**PFI hsa-mir-6720**

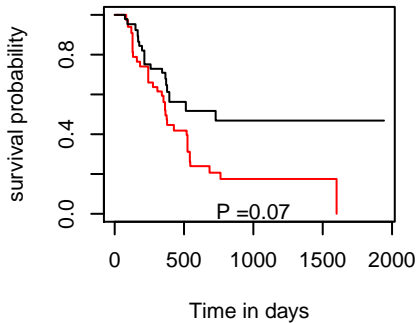

**DFI hsa-mir-6720**

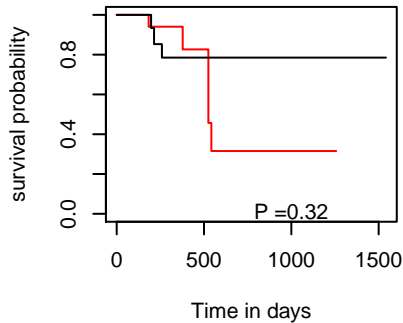

**DSS hsa-mir-6720**

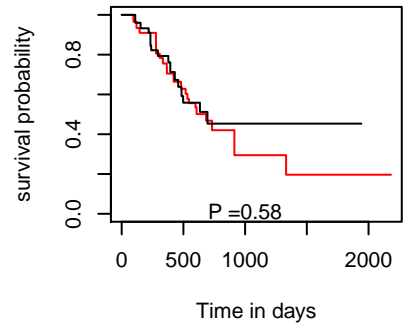

**OS hsa-mir-1249**

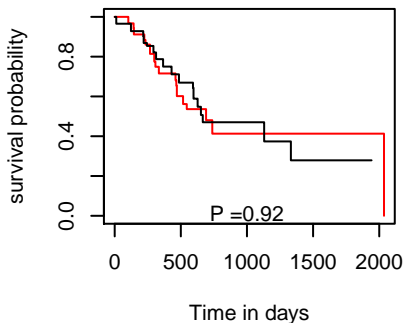

**PFI hsa-mir-1249**

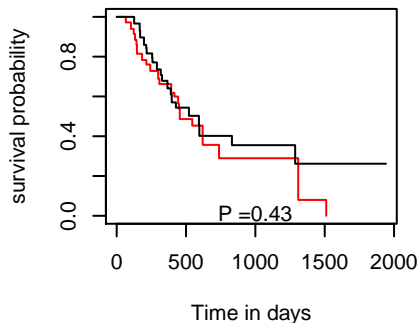

**DFI hsa-mir-1249**

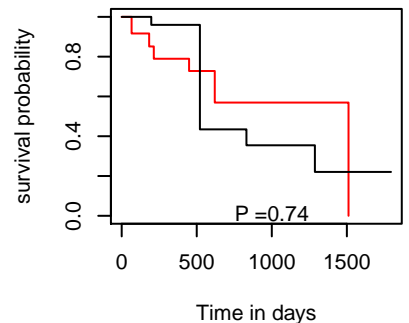

**DSS hsa-mir-1249**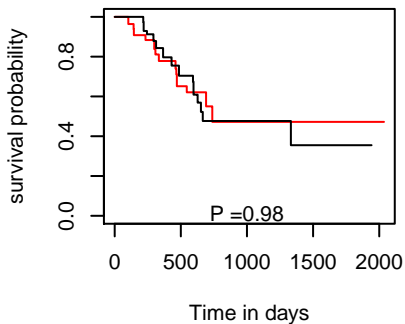**OS hsa-mir-3187**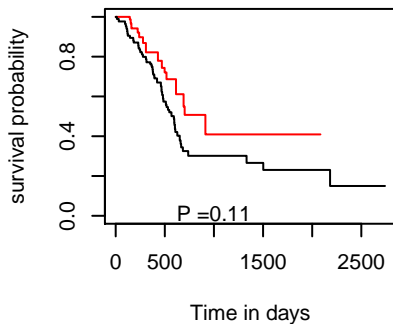**PFI hsa-mir-3187**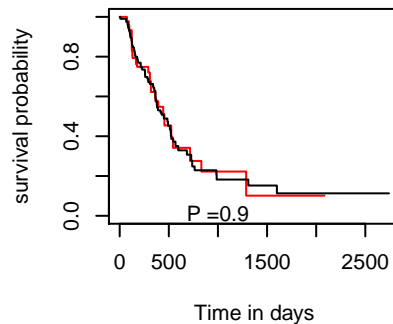**DFI hsa-mir-3187**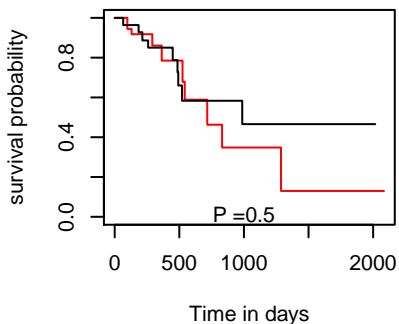**DSS hsa-mir-3187**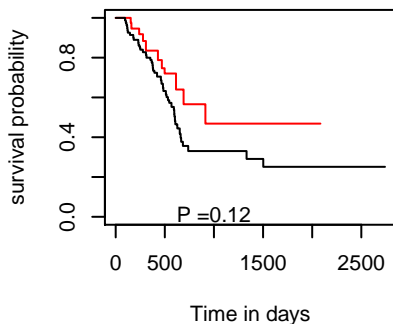**OS hsa-mir-30b**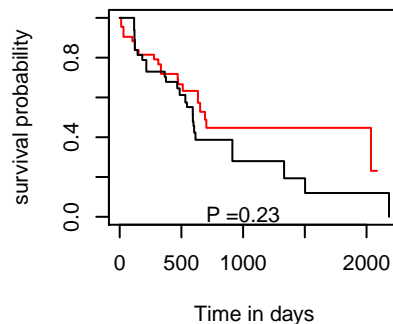**PFI hsa-mir-30b**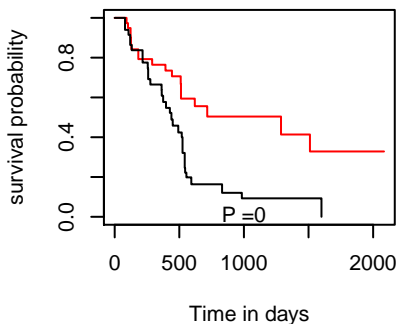**DFI hsa-mir-30b**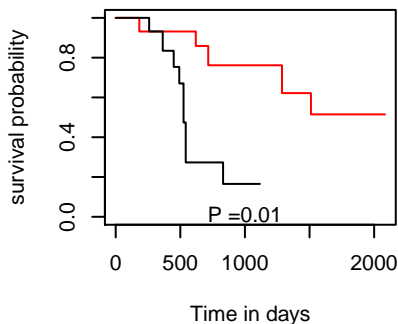**DSS hsa-mir-30b**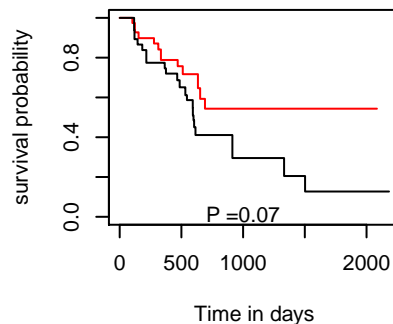

**OS hsa-mir-4658**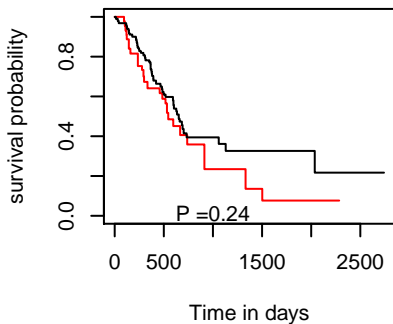**PFI hsa-mir-4658**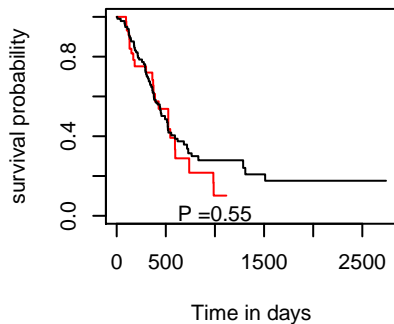**DFI hsa-mir-4658**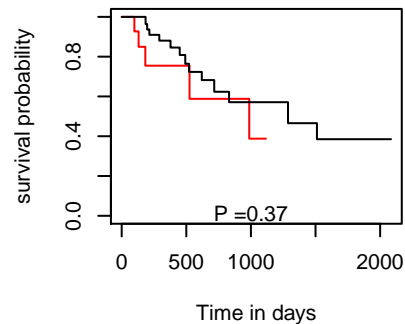**DSS hsa-mir-4658**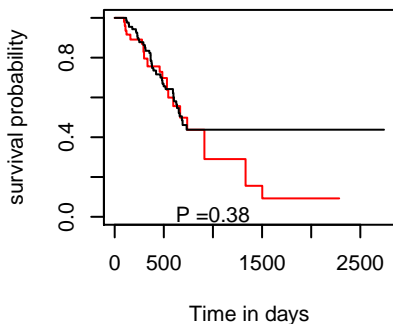**OS hsa-mir-4762**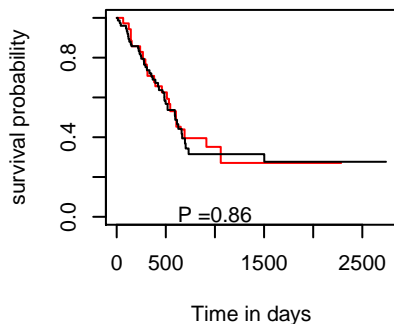**PFI hsa-mir-4762**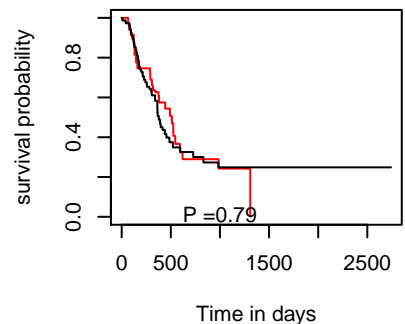**DFI hsa-mir-4762**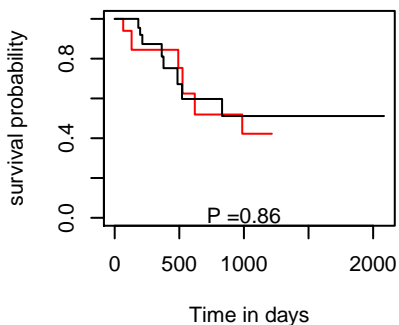**DSS hsa-mir-4762**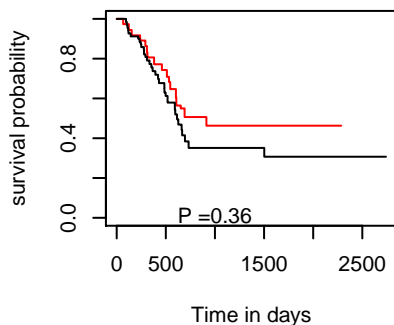**OS hsa-mir-3687**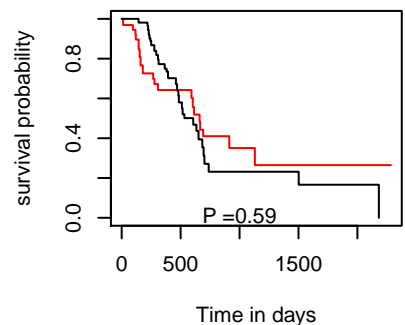

**PFI hsa-mir-3687**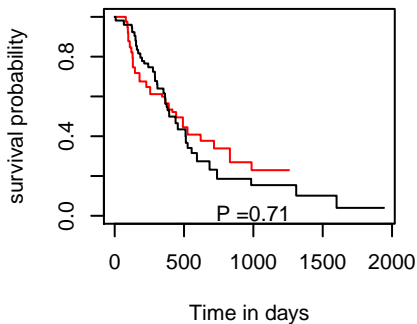**DFI hsa-mir-3687**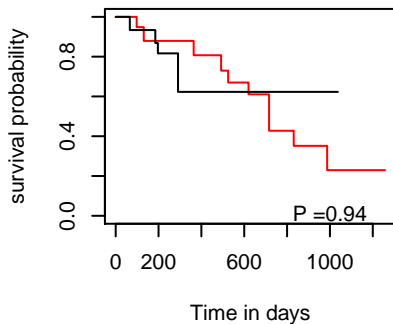**DSS hsa-mir-3687**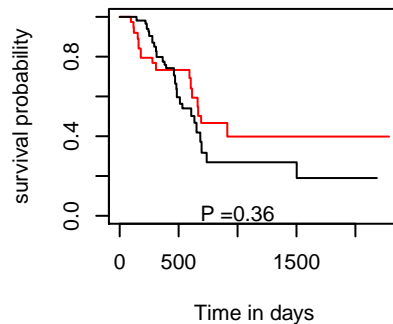**OS hsa-mir-6510**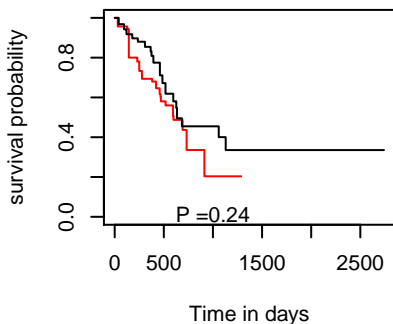**PFI hsa-mir-6510**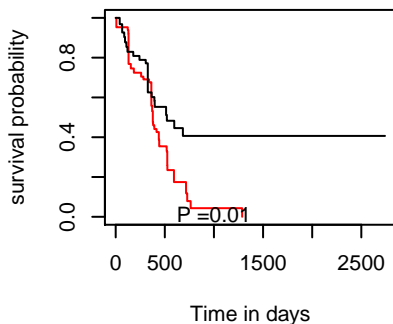**DFI hsa-mir-6510**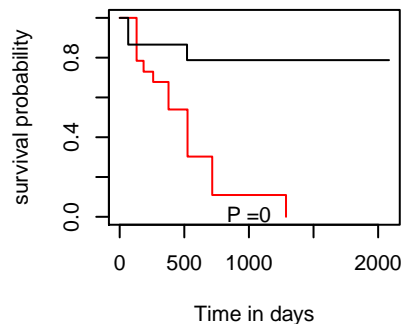**DSS hsa-mir-6510**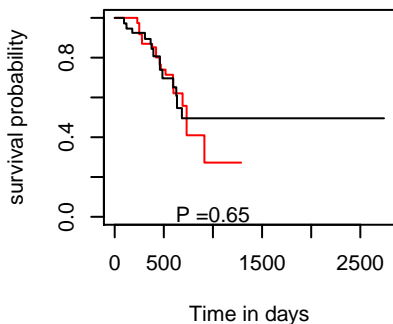**OS hsa-mir-483**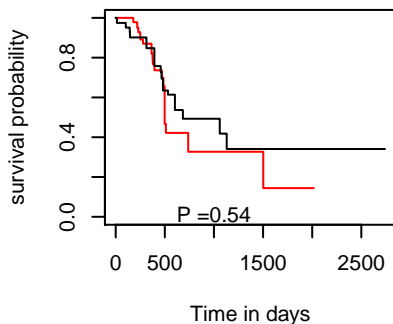**PFI hsa-mir-483**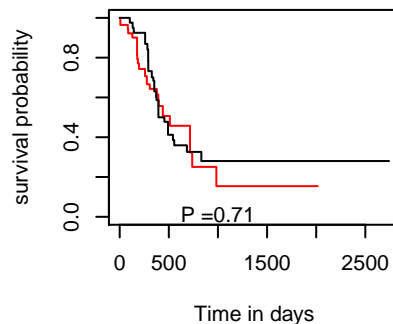

**OS hsa-mir-4687**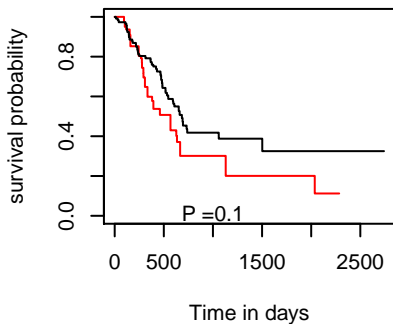**PFI hsa-mir-4687**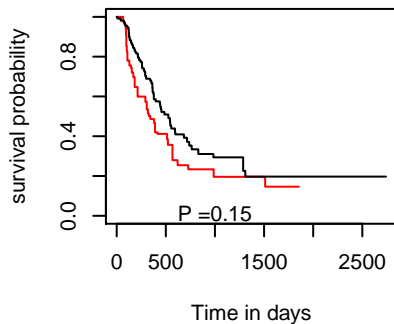**DFI hsa-mir-4687**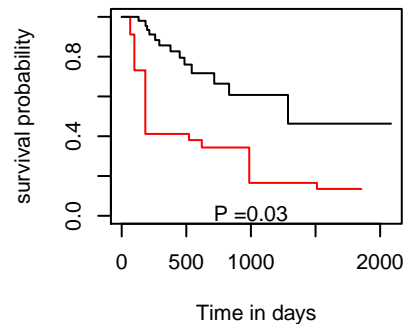**DSS hsa-mir-4687**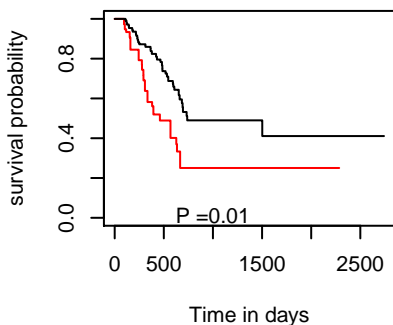**OS hsa-mir-4662a**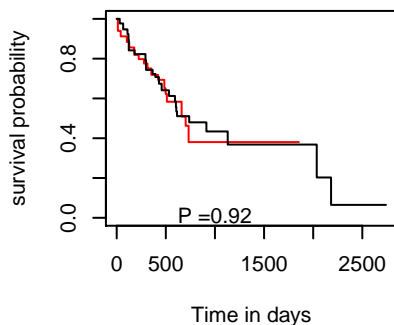**PFI hsa-mir-4662a**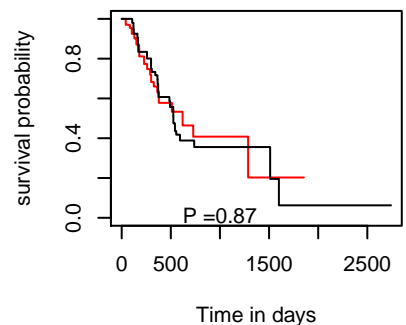**DFI hsa-mir-4662a**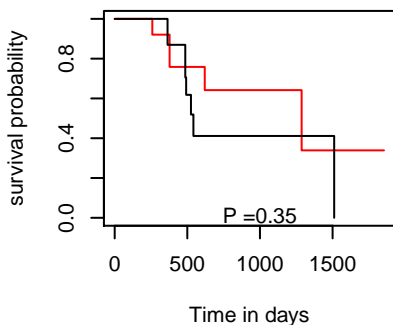**DSS hsa-mir-4662a**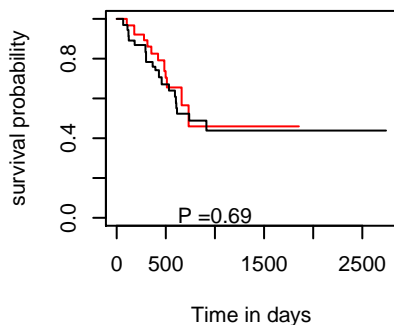**OS hsa-mir-582**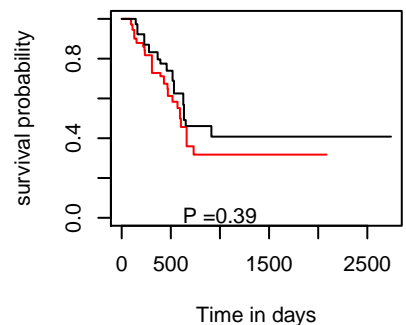

**PFI hsa-mir-582**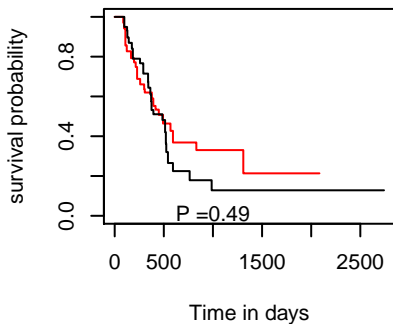**DFI hsa-mir-582**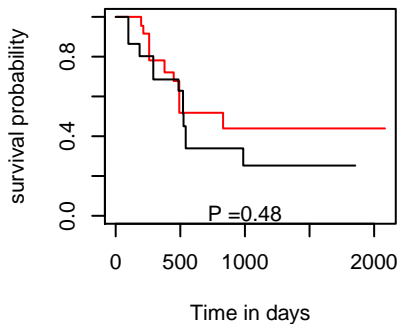**DSS hsa-mir-582**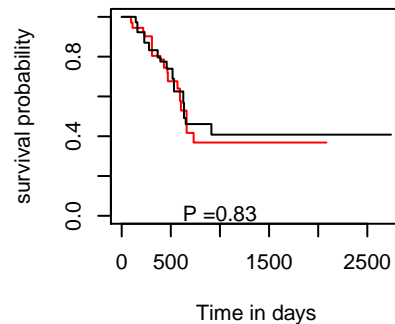**OS hsa-mir-3942**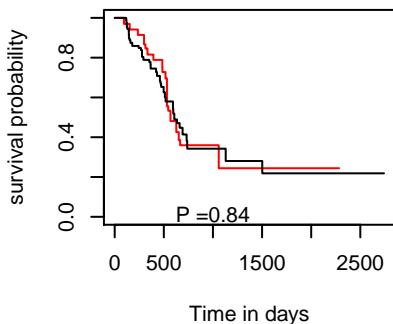**PFI hsa-mir-3942**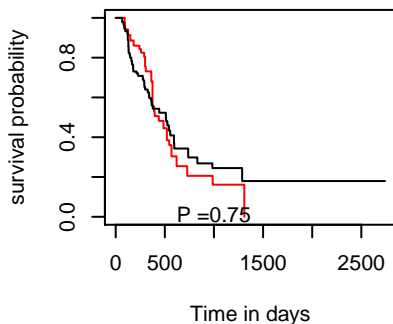**DFI hsa-mir-3942**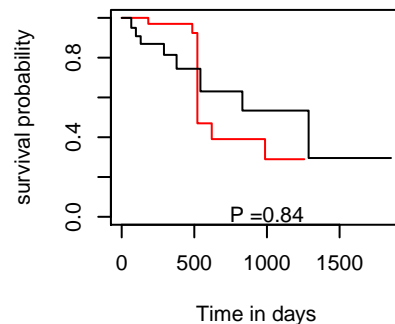**DSS hsa-mir-3942**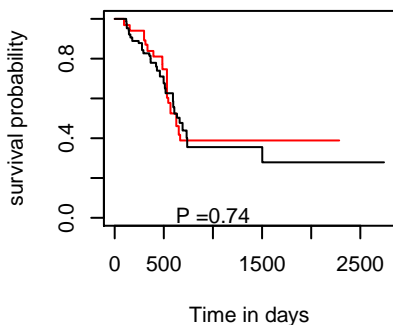**OS hsa-mir-3648**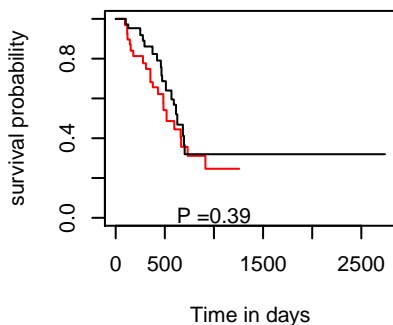**PFI hsa-mir-3648**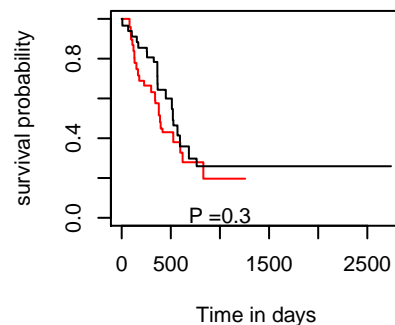

**DFI hsa-mir-3648**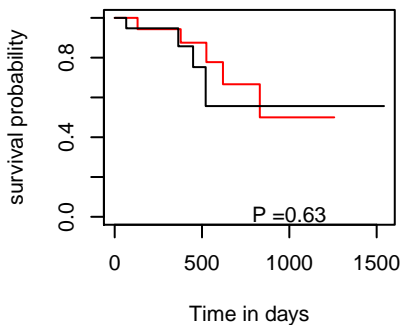**DSS hsa-mir-3648**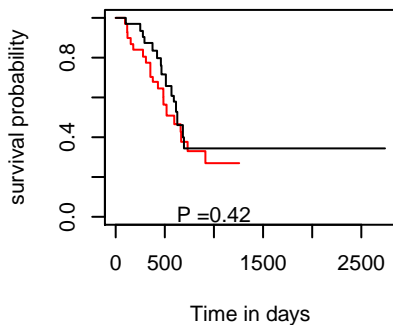**OS hsa-mir-5687**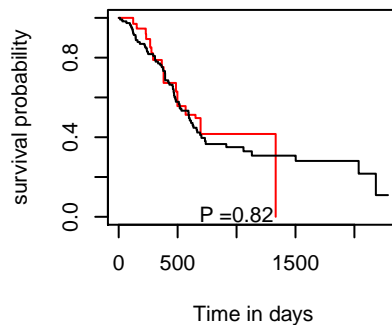**PFI hsa-mir-5687**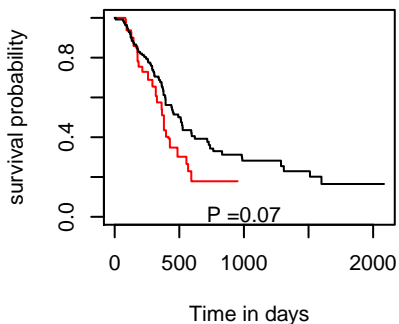**DFI hsa-mir-5687**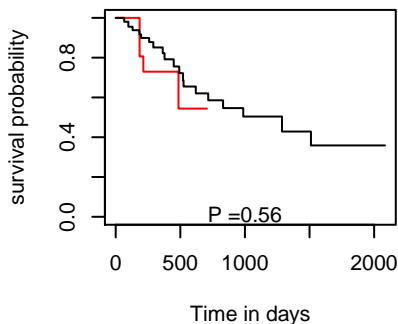**DSS hsa-mir-5687**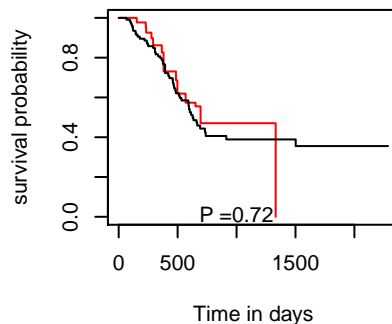**OS hsa-mir-7-3**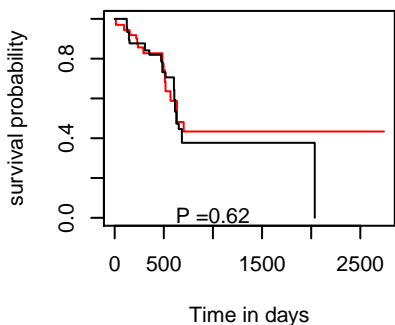**PFI hsa-mir-7-3**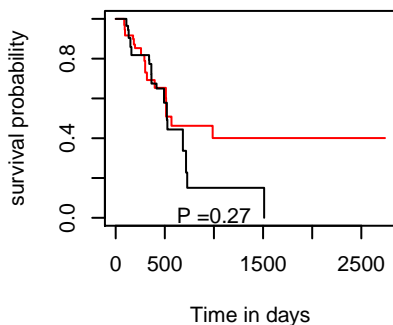**DFI hsa-mir-7-3**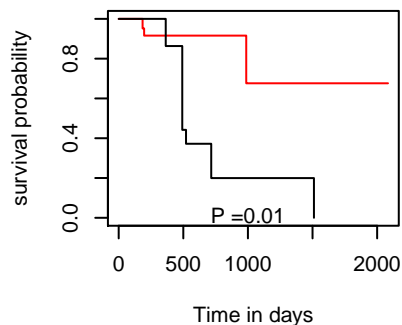

**DSS hsa-mir-7-3**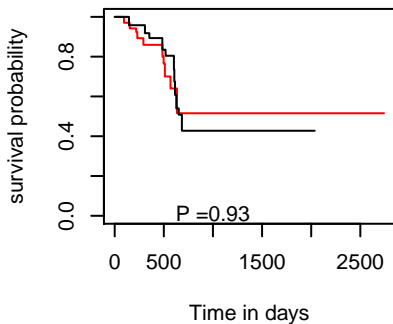**OS hsa-mir-6875**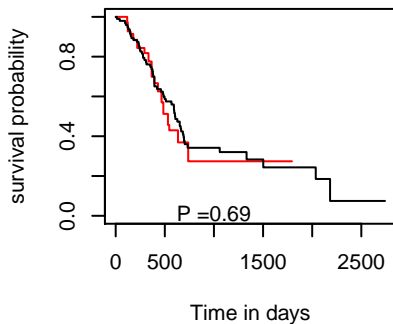**PFI hsa-mir-6875**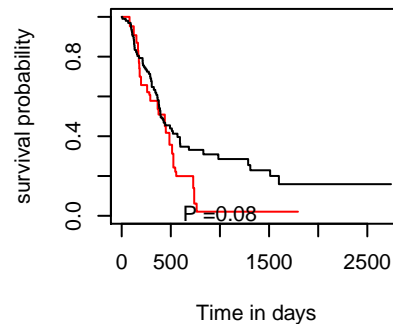**DFI hsa-mir-6875**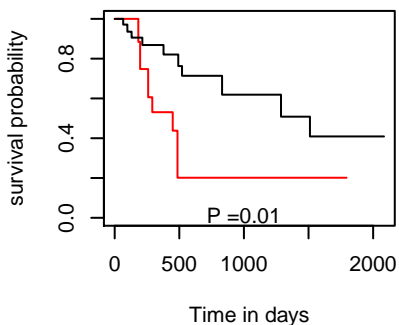**DSS hsa-mir-6875**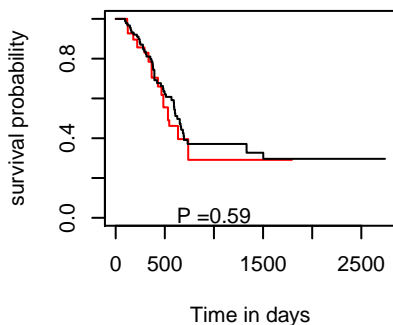**OS hsa-mir-3619**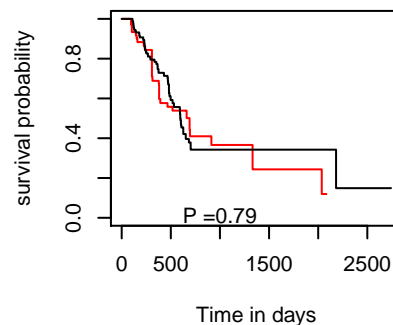**PFI hsa-mir-3619**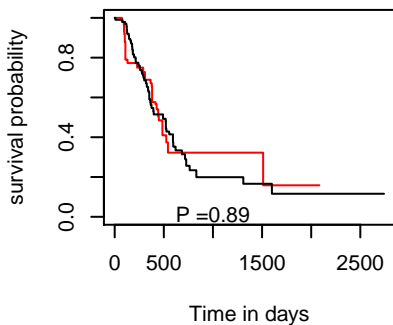**DFI hsa-mir-3619**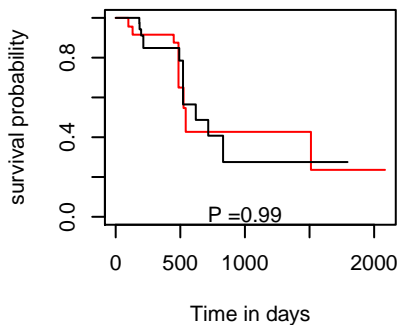**DSS hsa-mir-3619**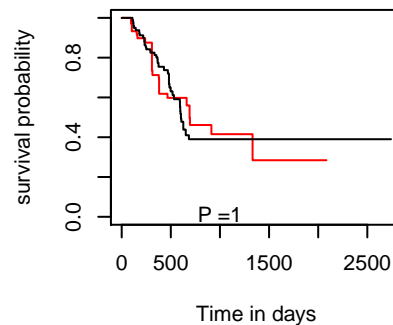

**OS hsa-mir-210**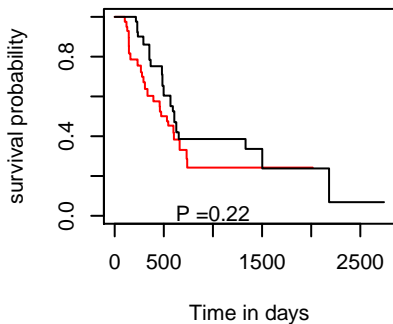**PFI hsa-mir-210**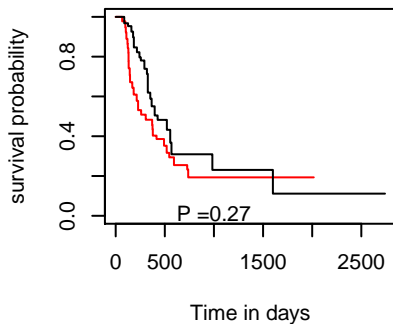**DFI hsa-mir-210**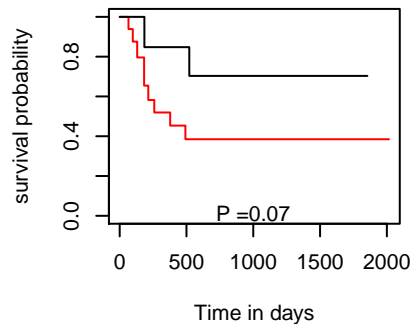**DSS hsa-mir-210**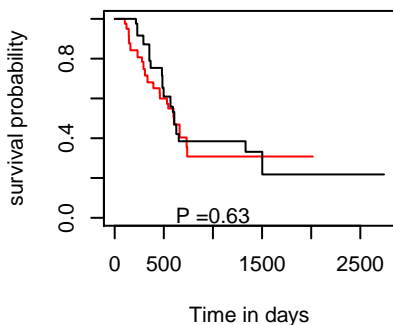**OS hsa-mir-106b**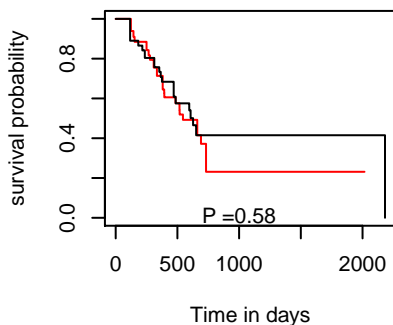**PFI hsa-mir-106b**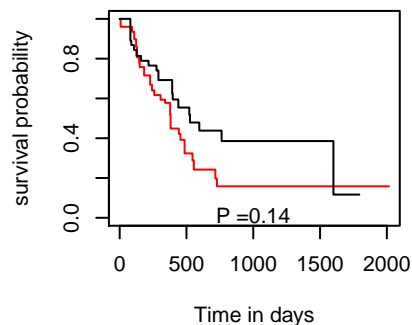**DFI hsa-mir-106b**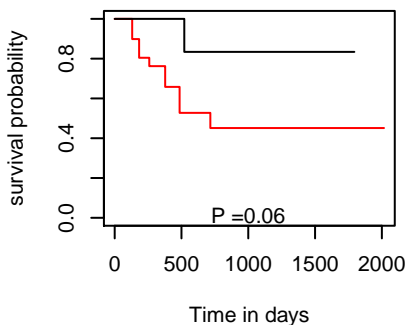**DSS hsa-mir-106b**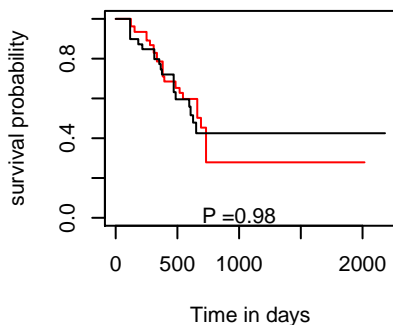**OS hsa-mir-93**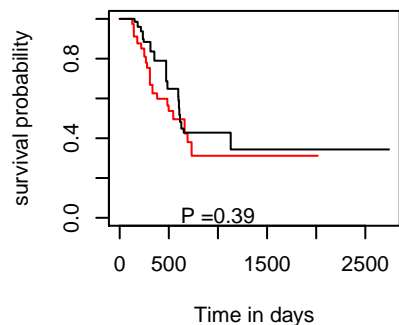

**PFI hsa-mir-93**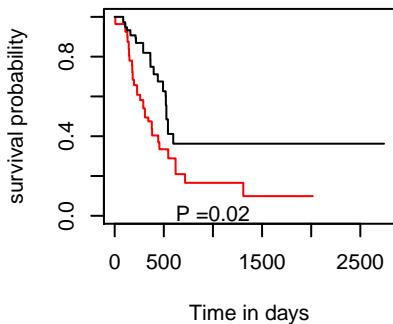**DFI hsa-mir-93**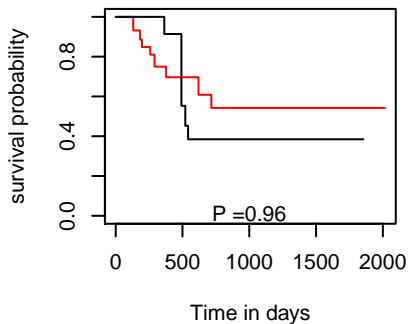**DSS hsa-mir-93**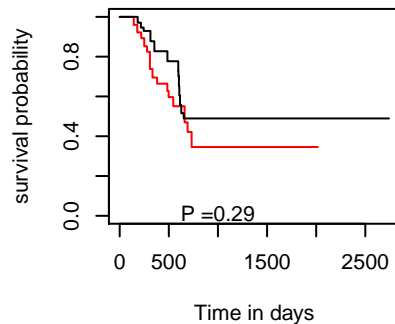**OS hsa-mir-675**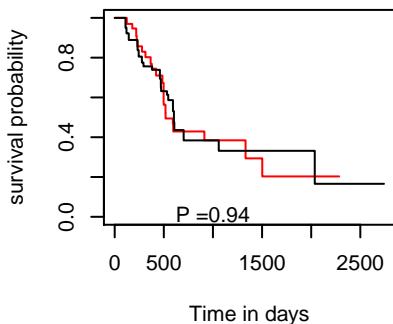**PFI hsa-mir-675**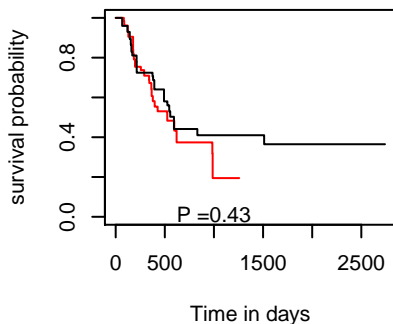**DFI hsa-mir-675**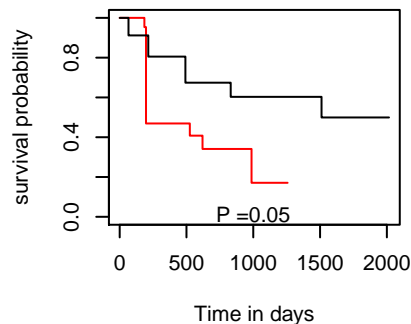**DSS hsa-mir-675**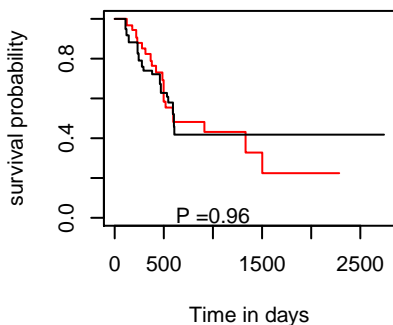**OS hsa-mir-142**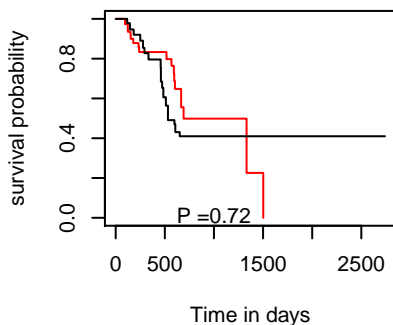**PFI hsa-mir-142**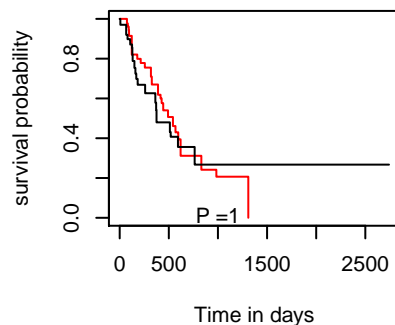

**OS hsa-let-7b**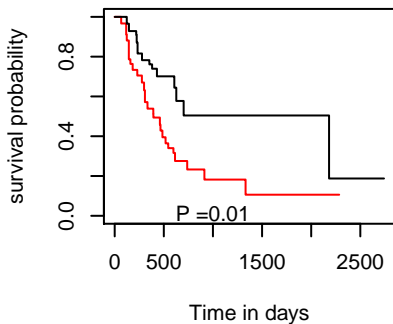**PFI hsa-let-7b**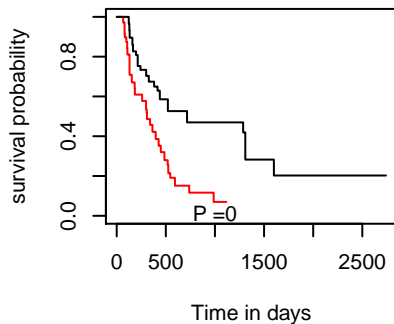**DFI hsa-let-7b**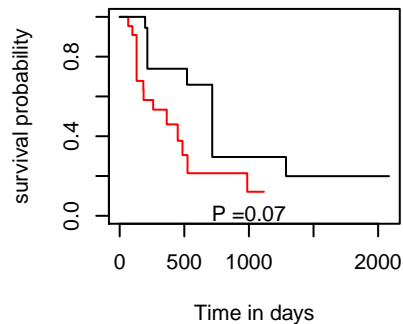**DSS hsa-let-7b**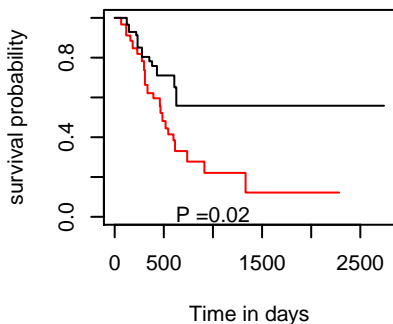**OS hsa-mir-942**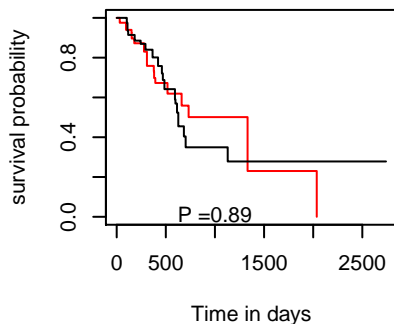**PFI hsa-mir-942**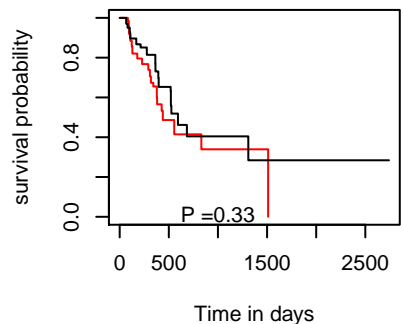**DFI hsa-mir-942**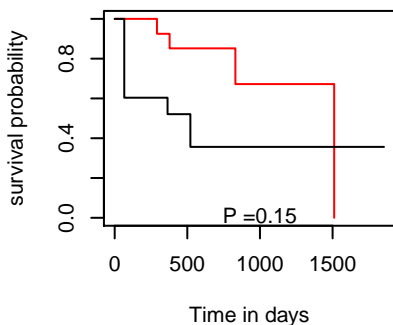**DSS hsa-mir-942**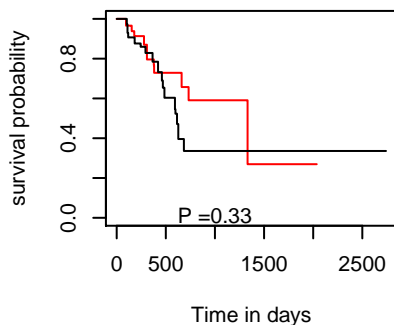**OS hsa-mir-581**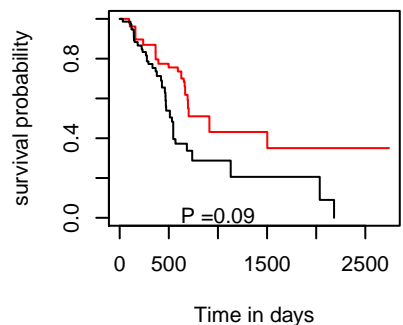

**PFI hsa-mir-581**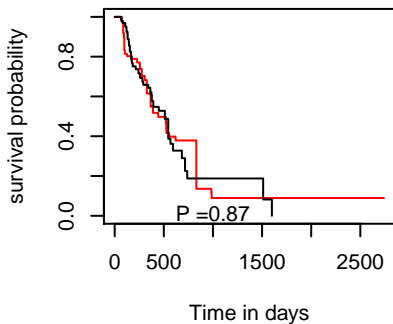**DFI hsa-mir-581**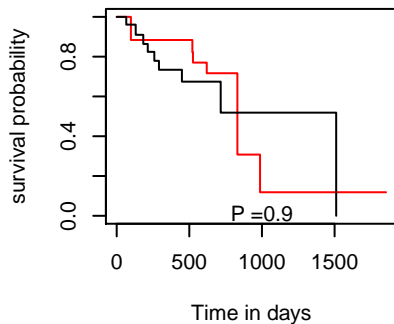**DSS hsa-mir-581**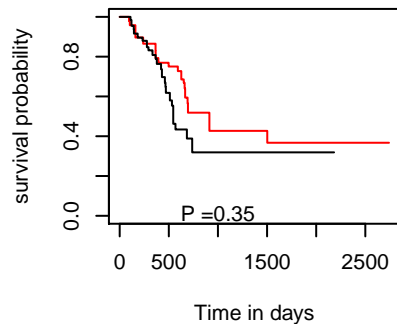**OS hsa-mir-3667**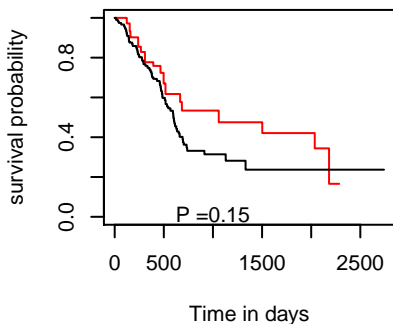**PFI hsa-mir-3667**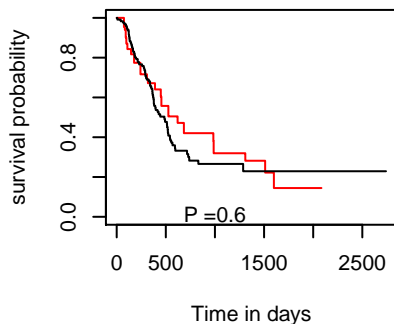**DFI hsa-mir-3667**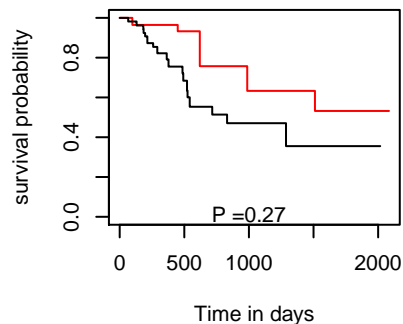**DSS hsa-mir-3667**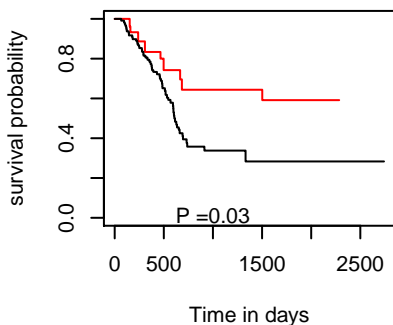**OS hsa-mir-31**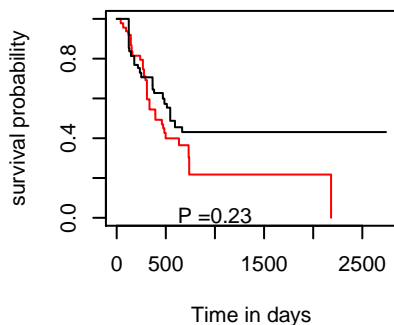**PFI hsa-mir-31**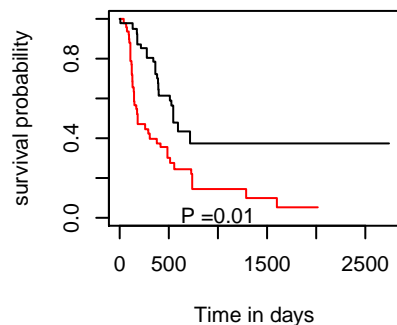

**DFI hsa-mir-31**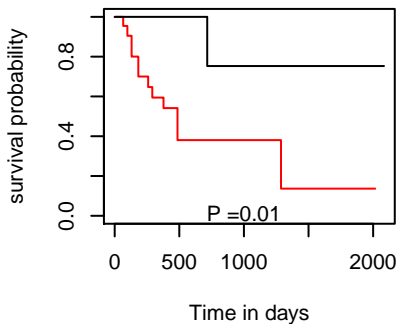**DSS hsa-mir-31**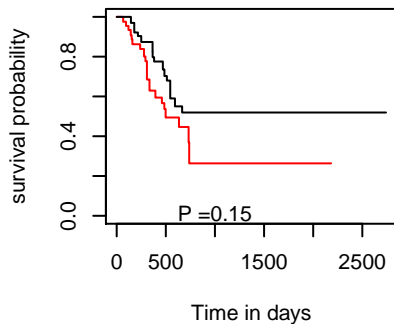**OS hsa-mir-937**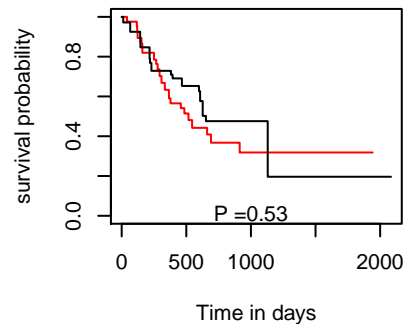**PFI hsa-mir-937**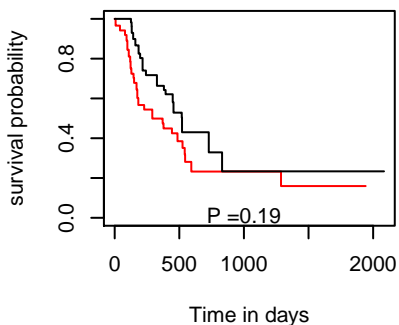**DFI hsa-mir-937**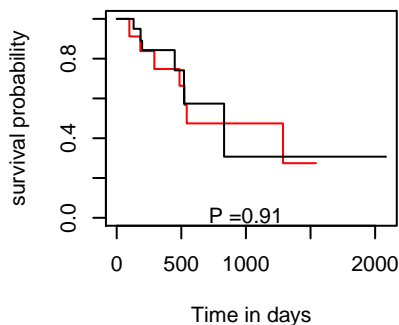**DSS hsa-mir-937**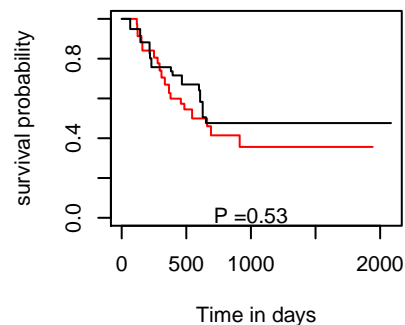**OS hsa-mir-301a**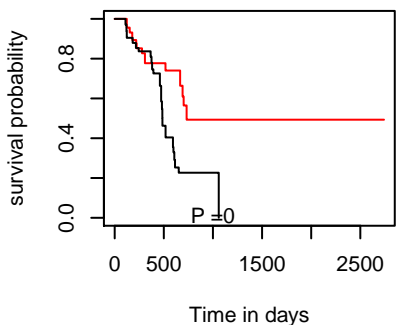**PFI hsa-mir-301a**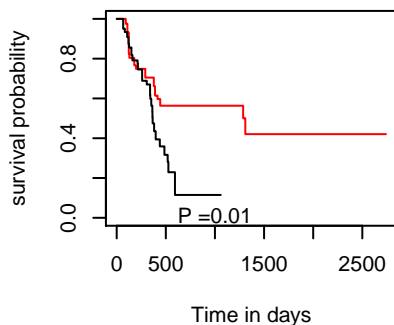**OS hsa-mir-4763**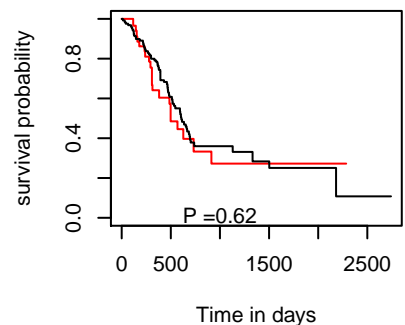

**PFI hsa-mir-4763**

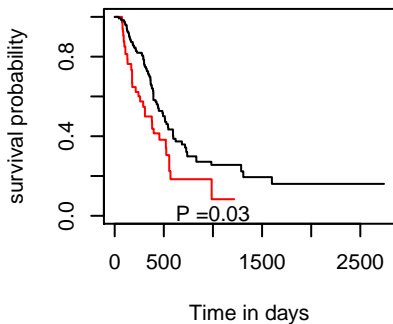

**DFI hsa-mir-4763**

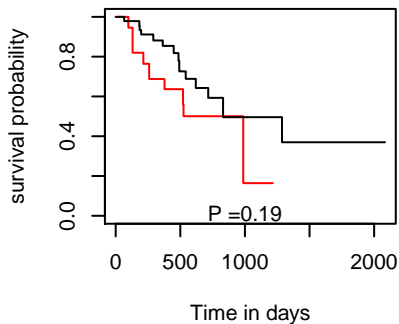

**DSS hsa-mir-4763**

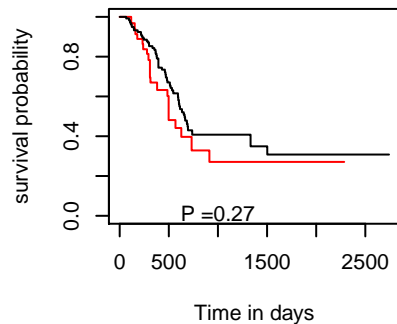

**OS hsa-let-7a-3**

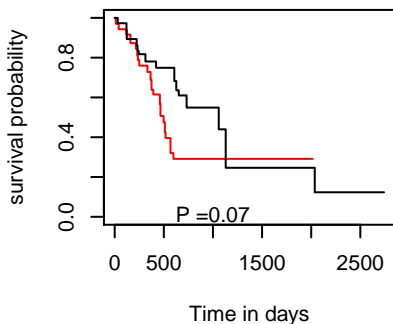

**PFI hsa-let-7a-3**

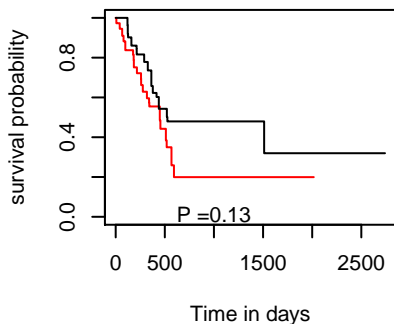

**DFI hsa-let-7a-3**

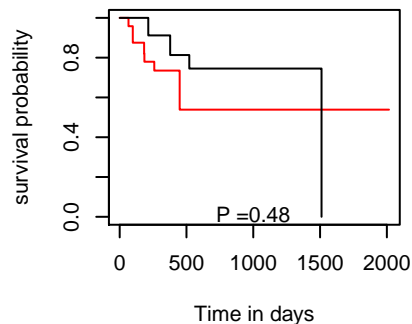

**DSS hsa-let-7a-3**

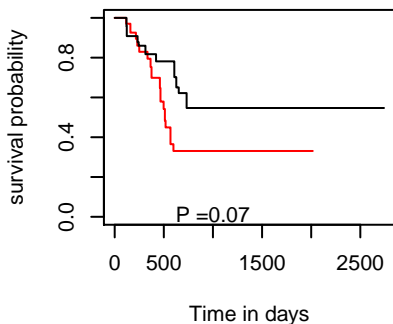

Supplement: MOESM24 [file 41598_2022_7628_MOESM24_ESM.pdf]
