# Supplementary material for: New Thinking on Read-Aloud.
Source: Springer Nature journal article supplement (doi:10.1038/s41598-022-07628-z), 2001-01-01

# Computing microRNA-gene interaction networks in pan-cancer using miRDriver

Banabithi Bose, Matthew Moravec, and Serdar Bozdog

# Supplemental Figure S16

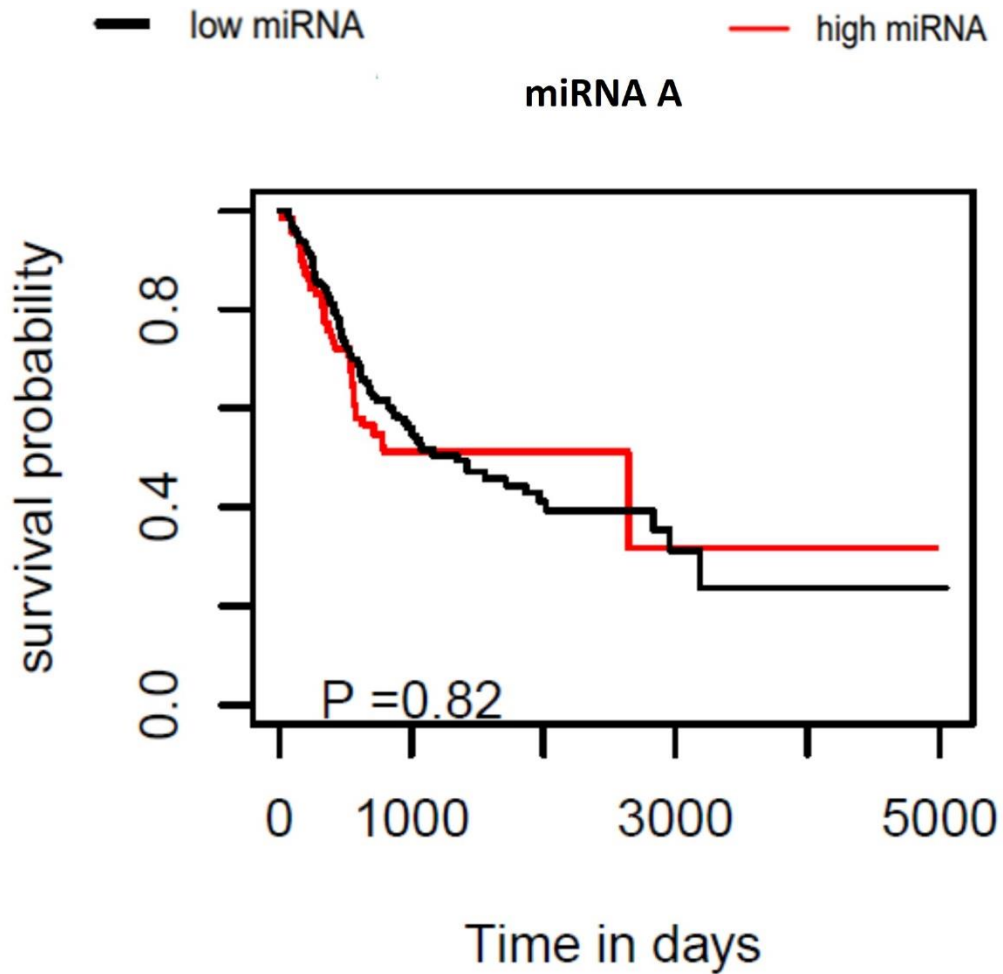

The *Adjusted Kaplan-Meier* survival plots for the computed miRNAs in high and low miRNA expression patient groups.

# Supplemental Figure S16

## Cancer Type: PRAD

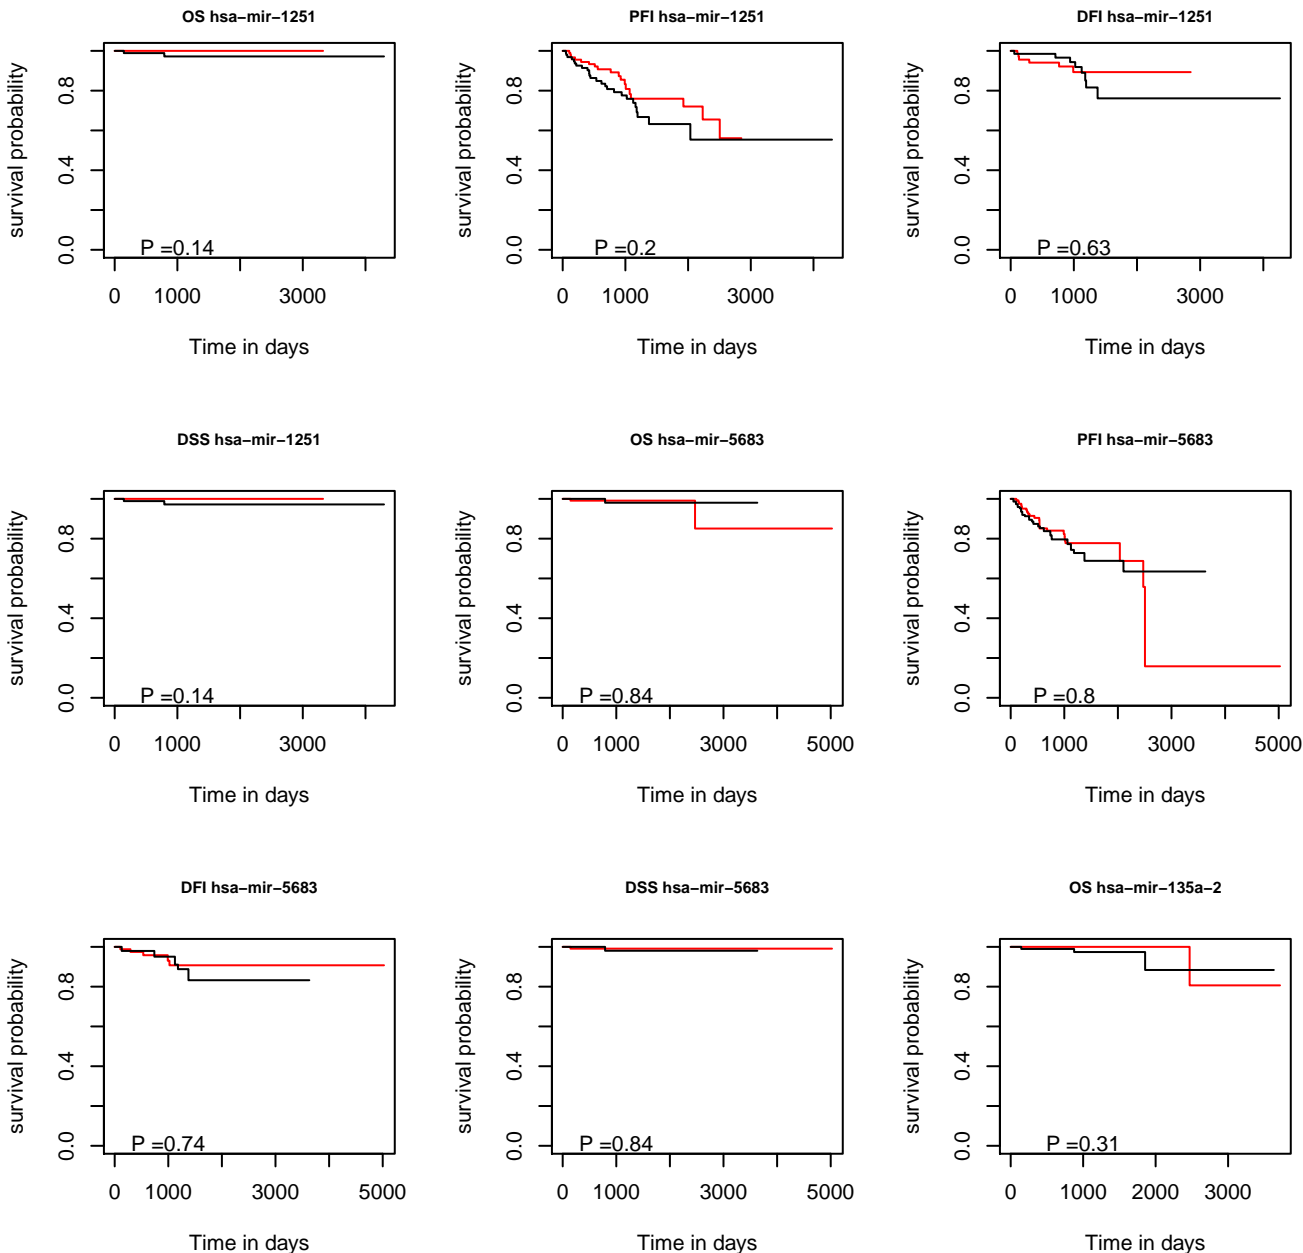

**PFI hsa-mir-135a-2**

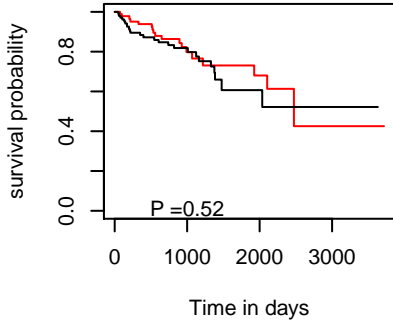

**DFI hsa-mir-135a-2**

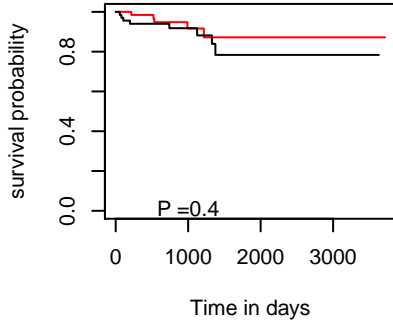

**DSS hsa-mir-135a-2**

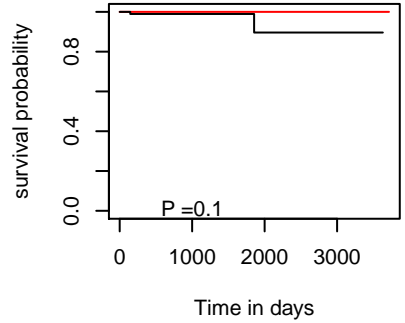

**OS hsa-mir-129-2**

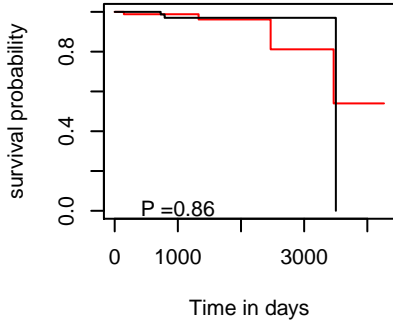

**PFI hsa-mir-129-2**

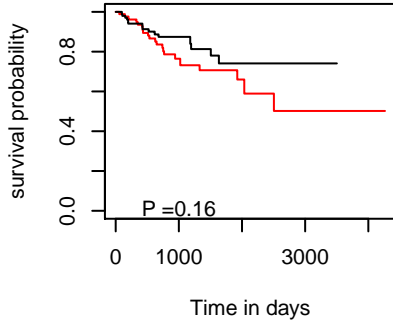

**DFI hsa-mir-129-2**

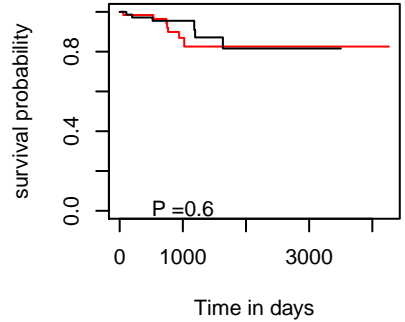

**DSS hsa-mir-129-2**

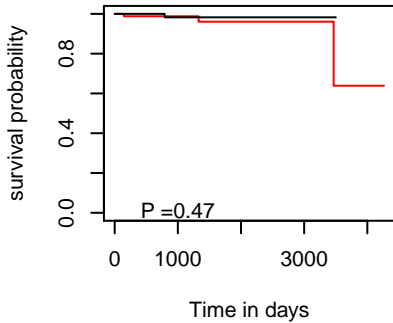

**OS hsa-mir-34c**

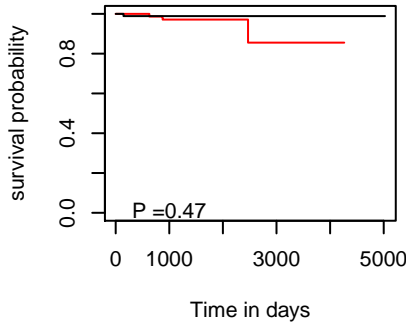

**PFI hsa-mir-34c**

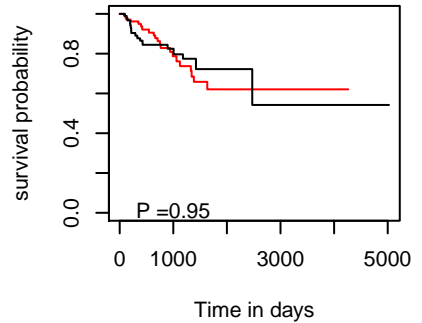

**DFI hsa-mir-34c**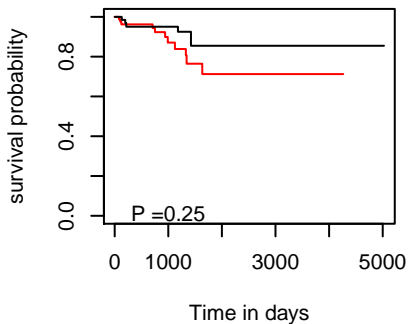**DSS hsa-mir-34c**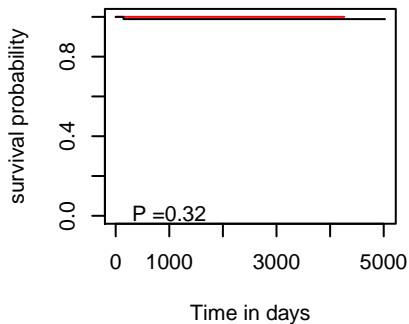**OS hsa-mir-449a**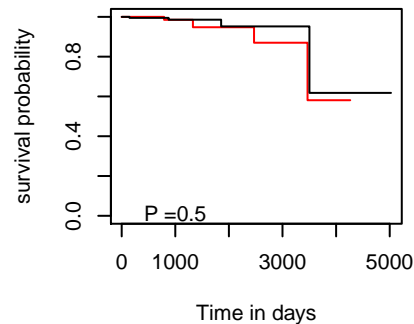**PFI hsa-mir-449a**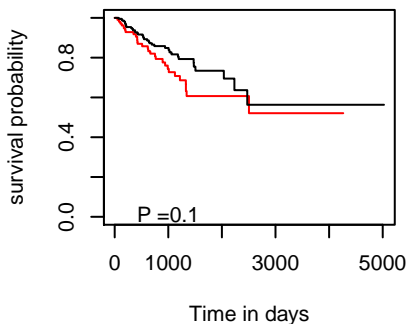**DFI hsa-mir-449a**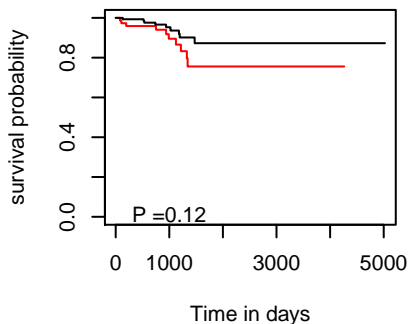**DSS hsa-mir-449a**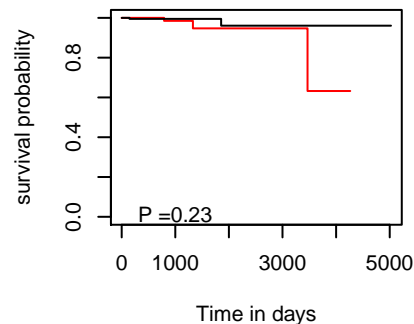**OS hsa-mir-760**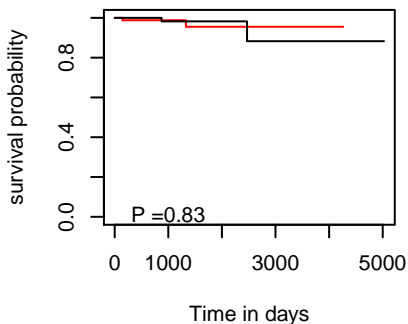**PFI hsa-mir-760**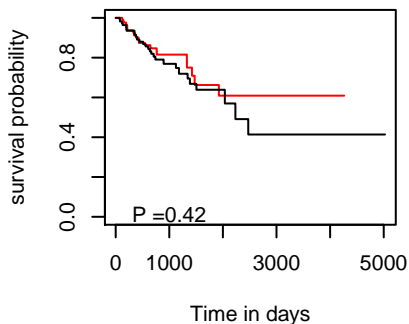**DFI hsa-mir-760**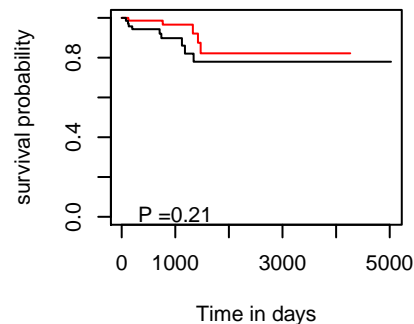

**DSS hsa-mir-760**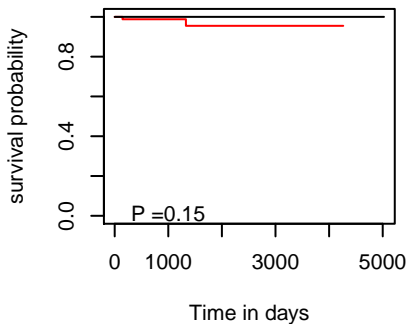**OS hsa-mir-34b**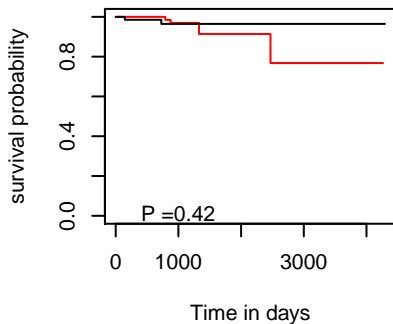**PFI hsa-mir-34b**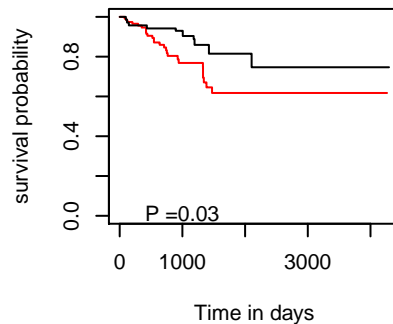**DFI hsa-mir-34b**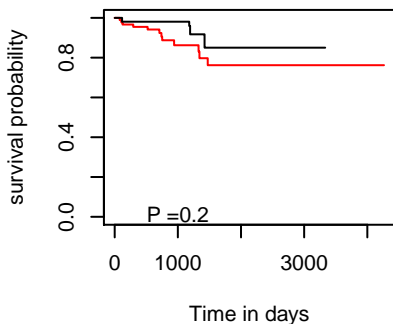**DSS hsa-mir-34b**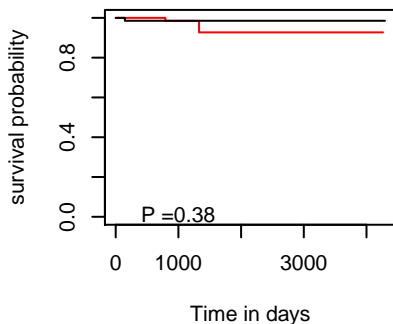**OS hsa-mir-1180**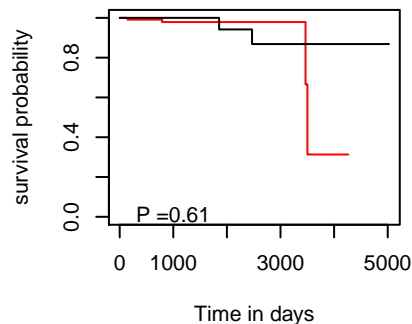**PFI hsa-mir-1180**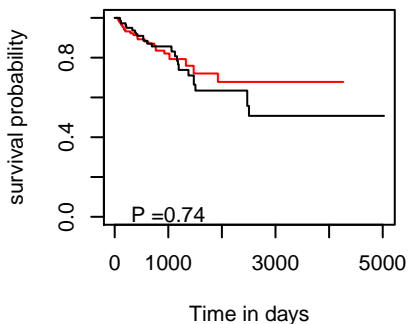**DFI hsa-mir-1180**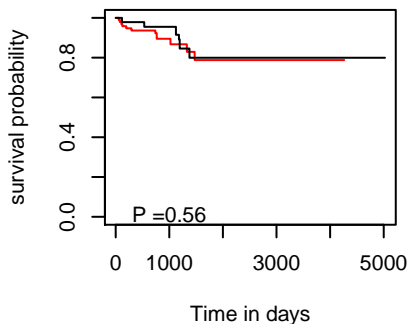**DSS hsa-mir-1180**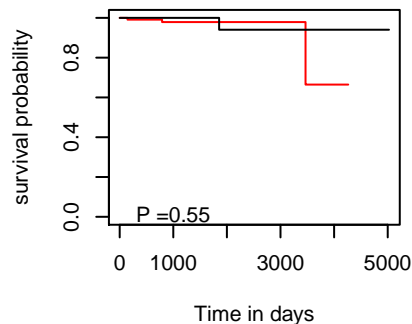

**OS hsa-mir-5706**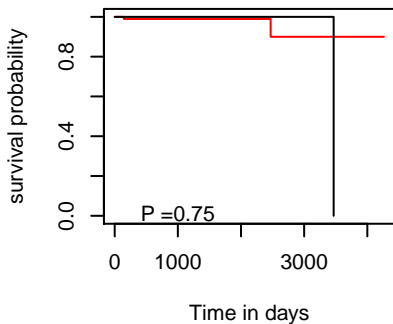**PFI hsa-mir-5706**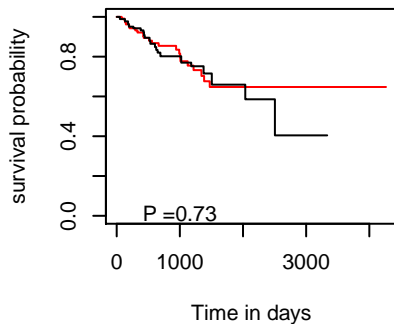**DFI hsa-mir-5706**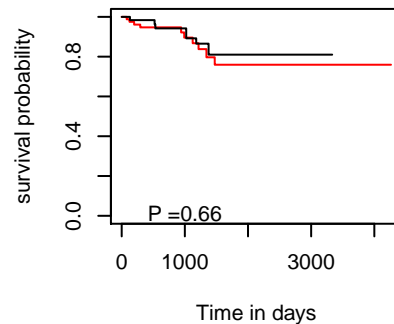**DSS hsa-mir-5706**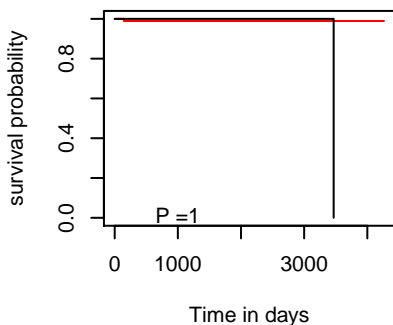**OS hsa-mir-146b**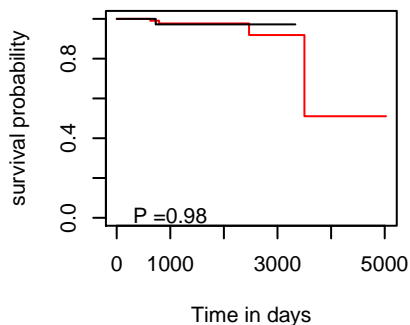**PFI hsa-mir-146b**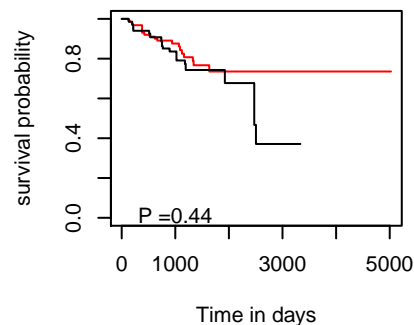**DFI hsa-mir-146b**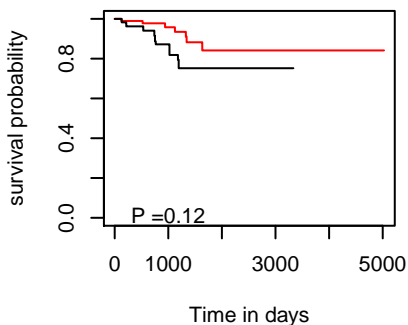**DSS hsa-mir-146b**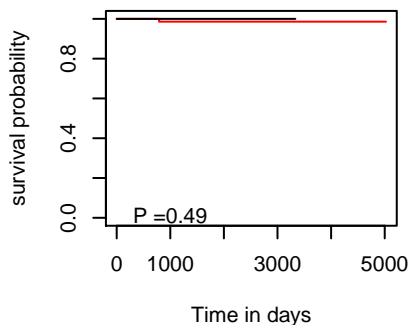**OS hsa-mir-497**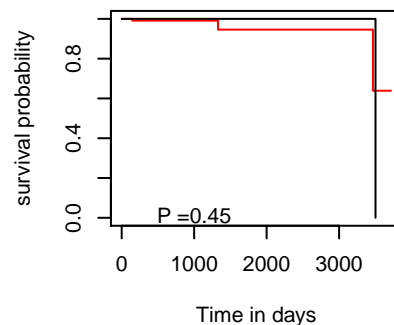

**PFI hsa-mir-497**

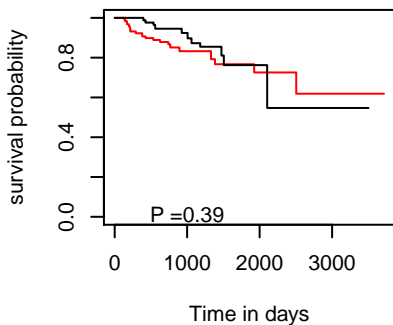

**DFI hsa-mir-497**

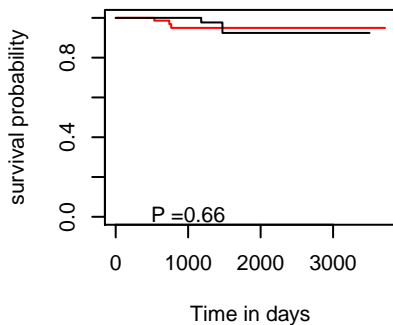

**DSS hsa-mir-497**

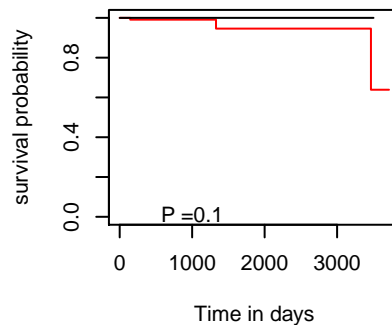

**OS hsa-mir-582**

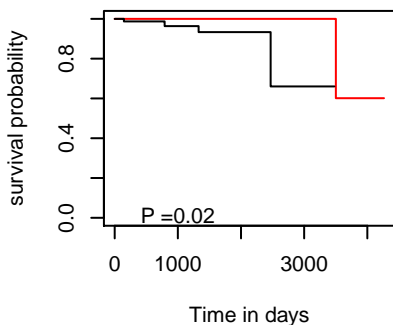

**PFI hsa-mir-582**

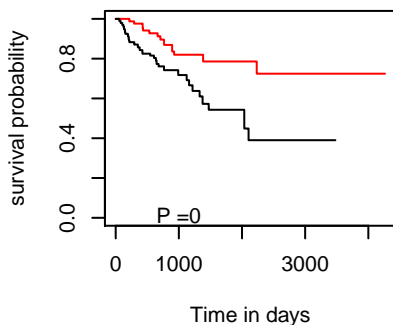

**DFI hsa-mir-582**

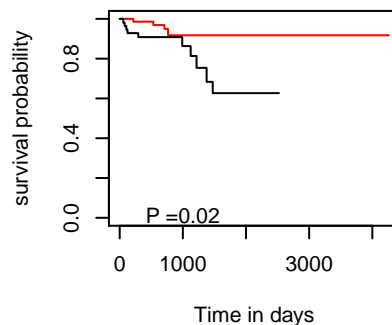

**DSS hsa-mir-582**

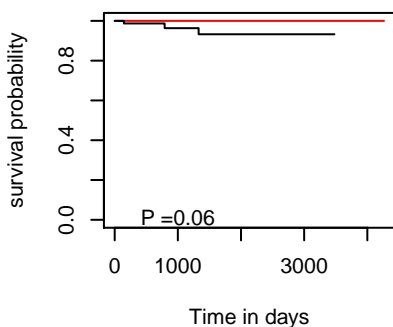

**OS hsa-mir-6716**

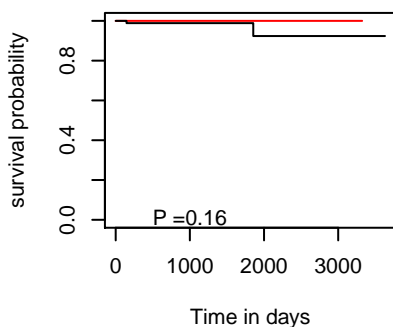

**PFI hsa-mir-6716**

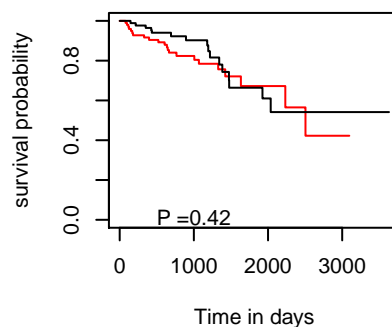

**DFI hsa-mir-6716**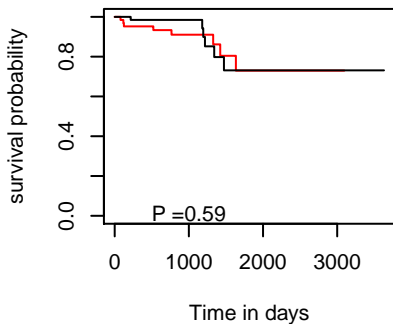**DSS hsa-mir-6716**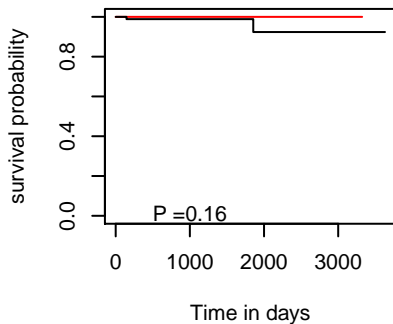**OS hsa-mir-486**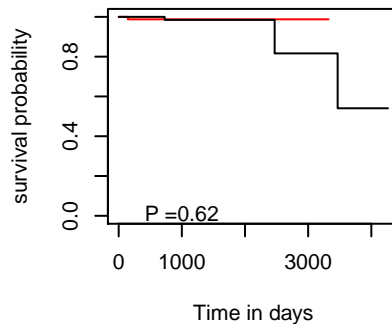**PFI hsa-mir-486**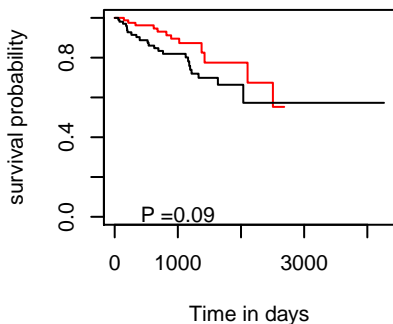**DFI hsa-mir-486**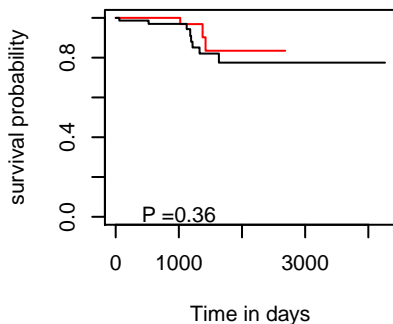**DSS hsa-mir-486**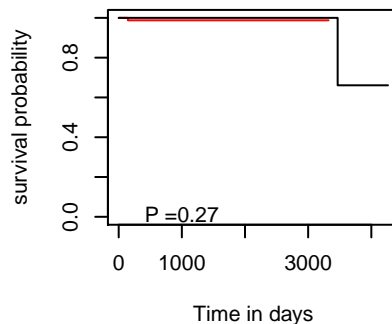**OS hsa-mir-4797**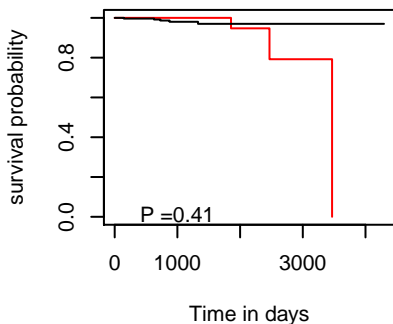**PFI hsa-mir-4797**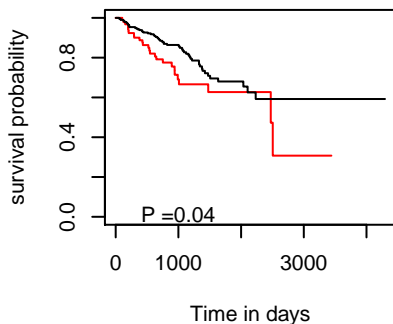**DFI hsa-mir-4797**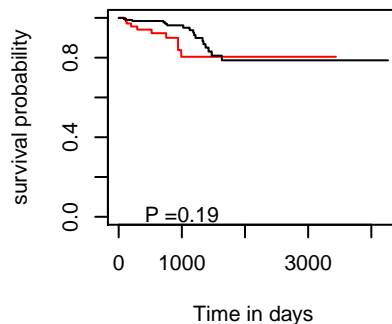

**DSS hsa-mir-4797**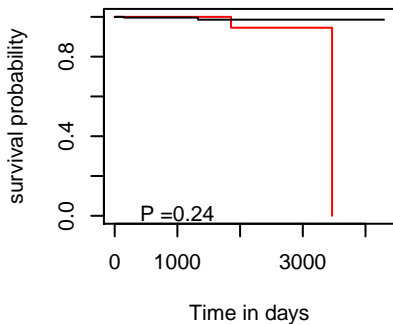**OS hsa-mir-4742**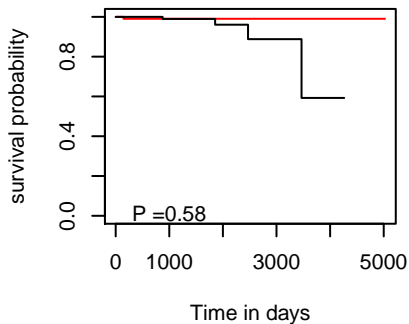**PFI hsa-mir-4742**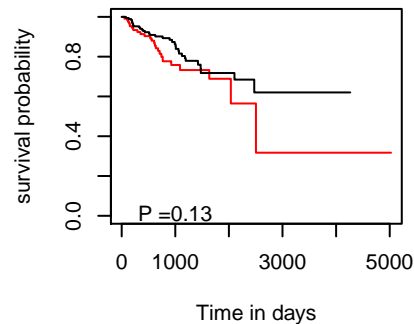**DFI hsa-mir-4742**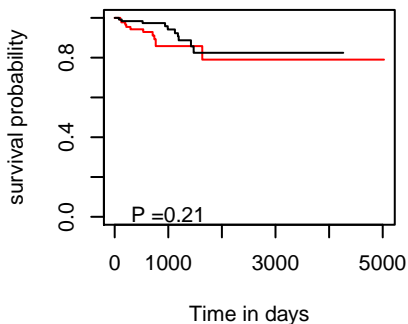**DSS hsa-mir-4742**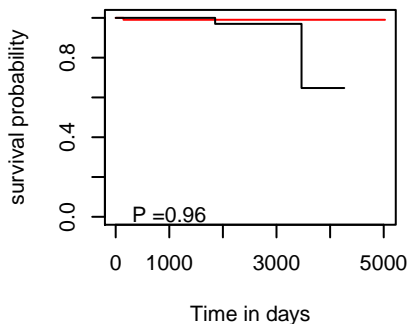**OS hsa-mir-320b-2**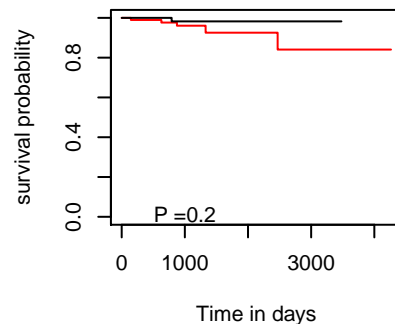**PFI hsa-mir-320b-2**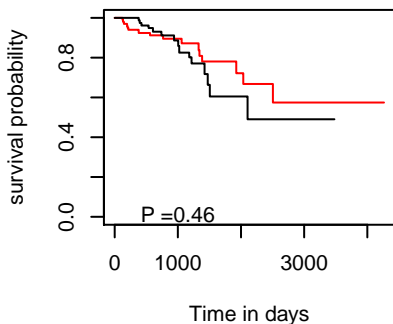**DFI hsa-mir-320b-2**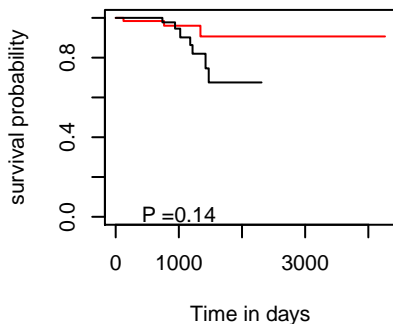**DSS hsa-mir-320b-2**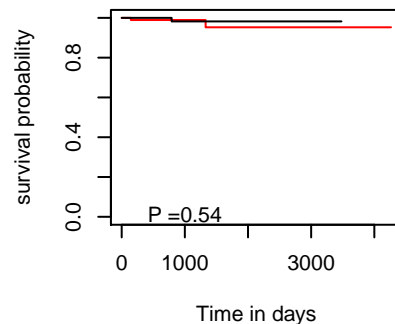

**OS hsa-mir-548k**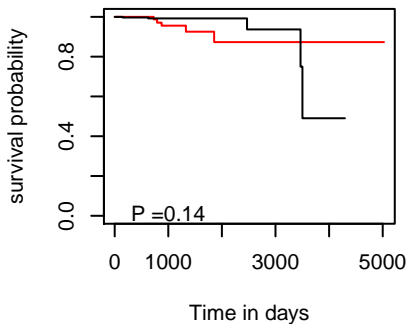**PFI hsa-mir-548k**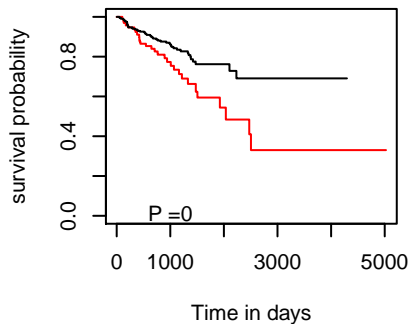**DFI hsa-mir-548k**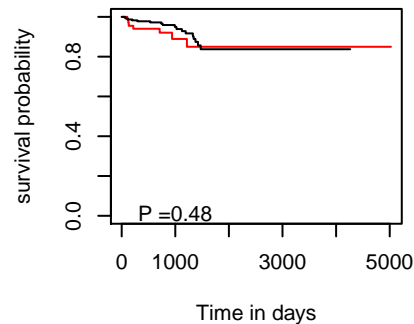**DSS hsa-mir-548k**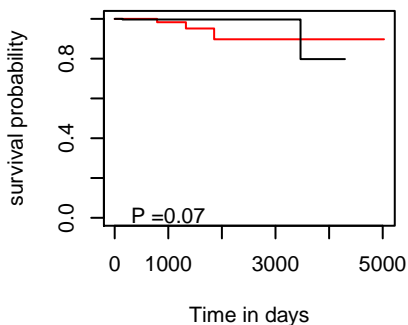**OS hsa-mir-9-2**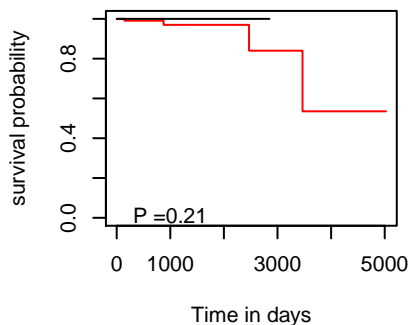**PFI hsa-mir-9-2**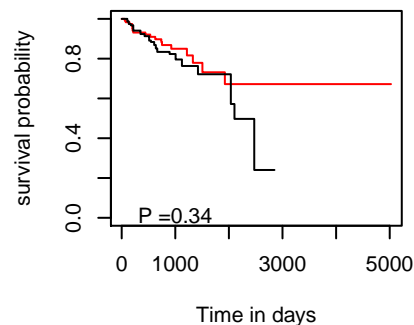**DFI hsa-mir-9-2**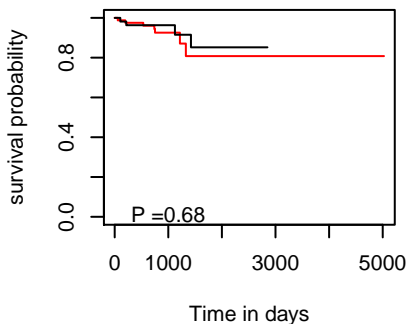**DSS hsa-mir-9-2**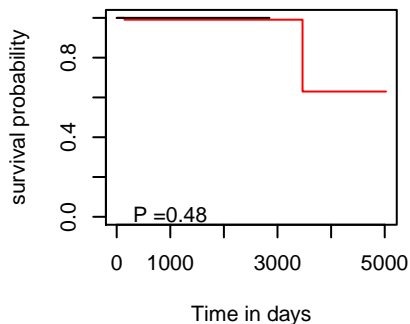**OS hsa-mir-30a**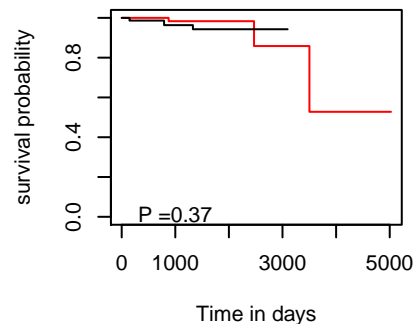

**PFI hsa-mir-30a**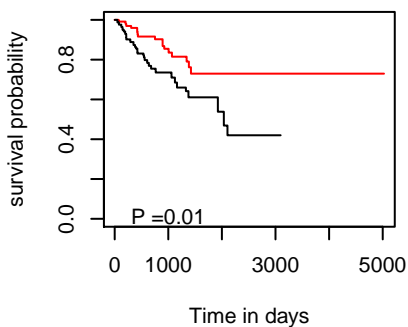**DFI hsa-mir-30a**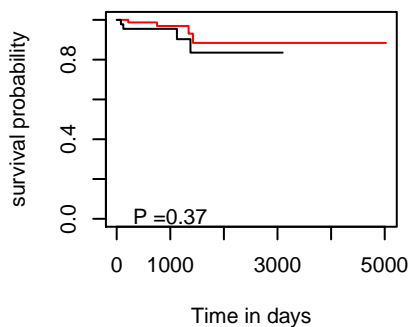**DSS hsa-mir-30a**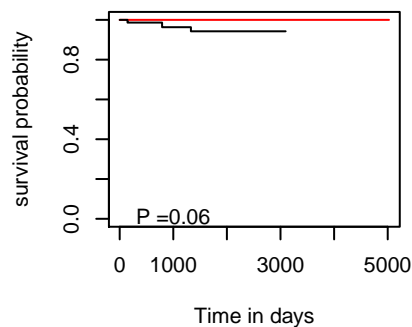**OS hsa-mir-3607**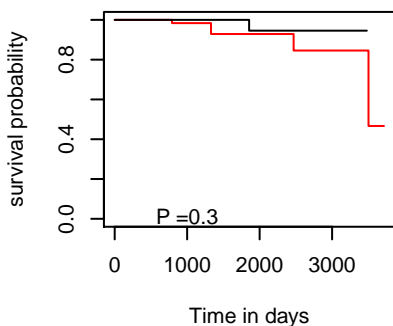**PFI hsa-mir-3607**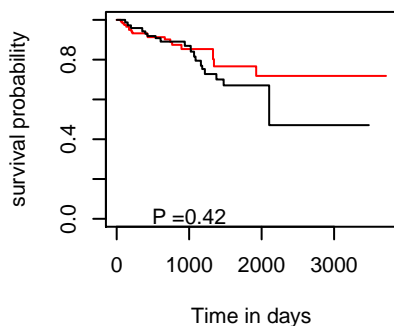**DFI hsa-mir-3607**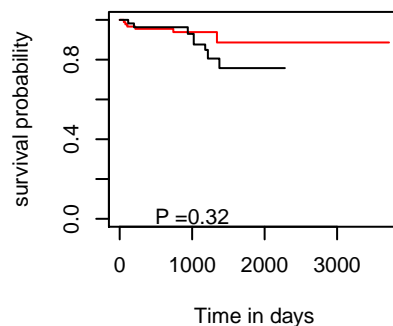**DSS hsa-mir-3607**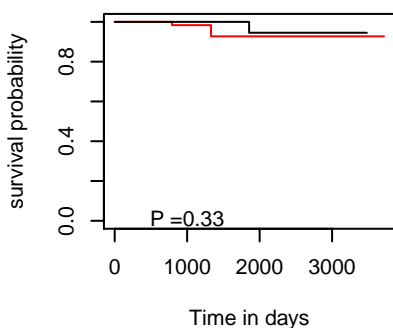**OS hsa-mir-181a-2**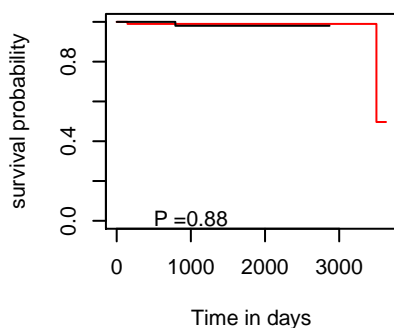**PFI hsa-mir-181a-2**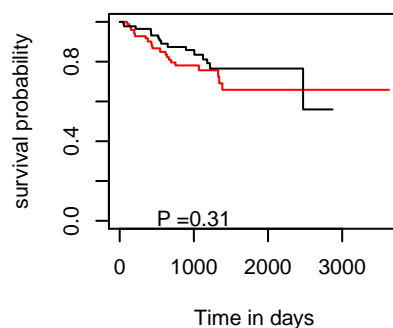

**DFI hsa-mir-181a-2**

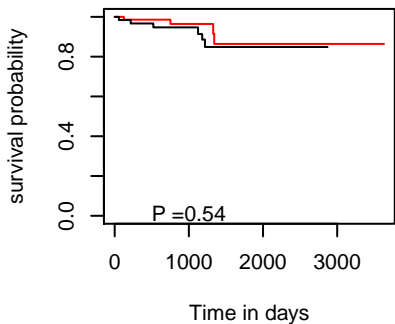

**DSS hsa-mir-181a-2**

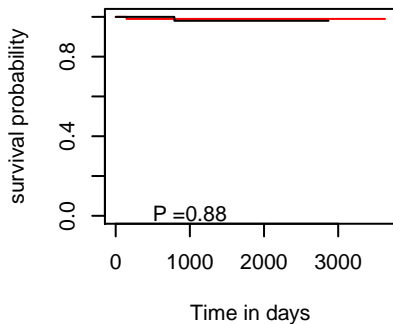

**OS hsa-mir-196a-1**

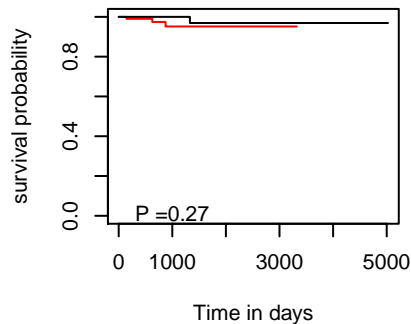

**PFI hsa-mir-196a-1**

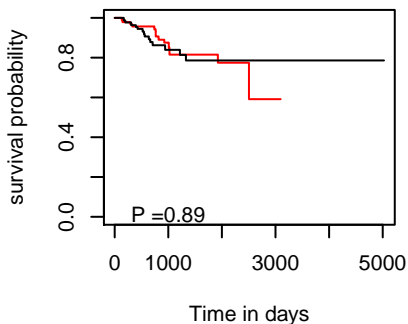

**DFI hsa-mir-196a-1**

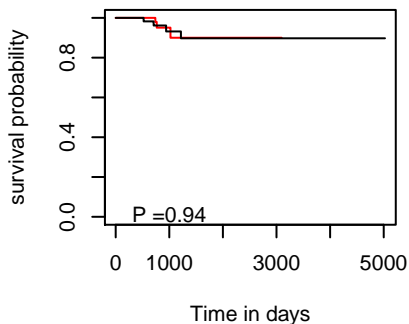

**DSS hsa-mir-196a-1**

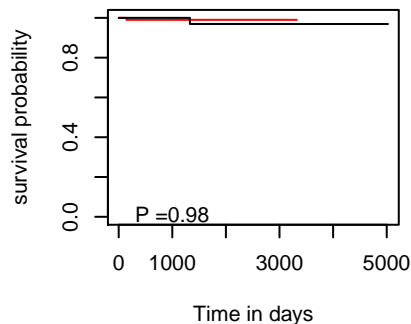

**OS hsa-mir-4784**

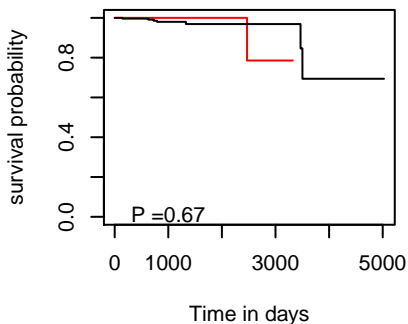

**PFI hsa-mir-4784**

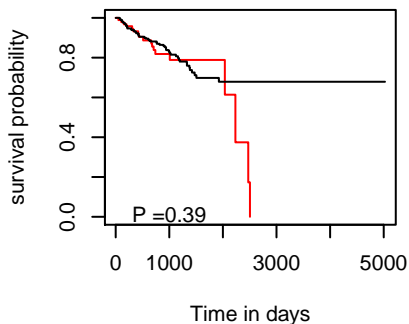

**DFI hsa-mir-4784**

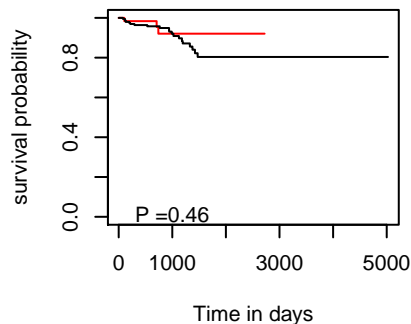

**DSS hsa-mir-4784**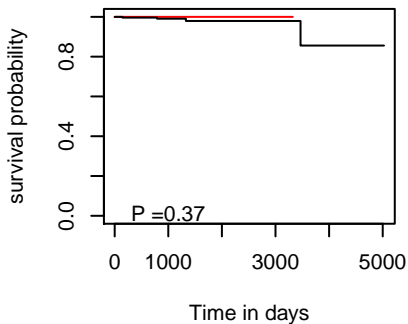**OS hsa-mir-550a-2**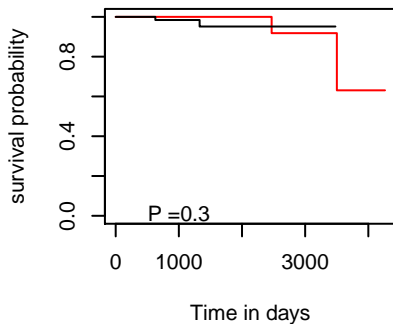**PFI hsa-mir-550a-2**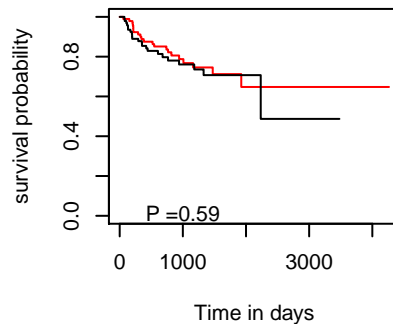**DFI hsa-mir-550a-2**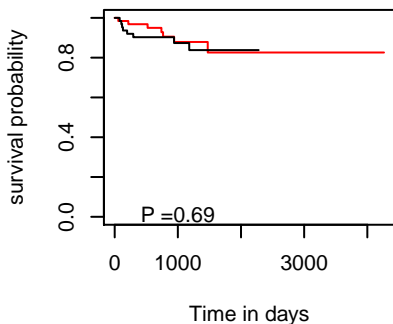**DSS hsa-mir-550a-2**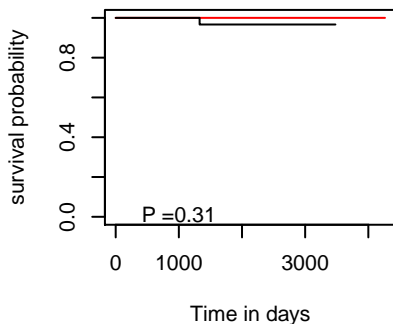**OS hsa-mir-4521**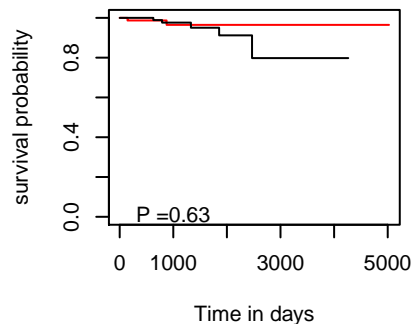**PFI hsa-mir-4521**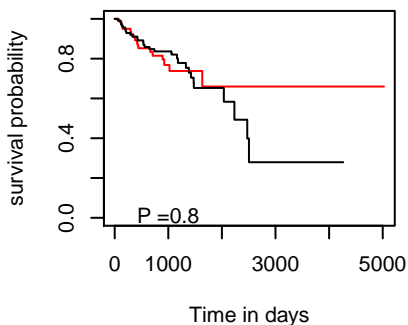**DFI hsa-mir-4521**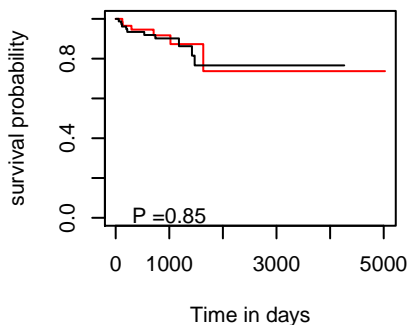**DSS hsa-mir-4521**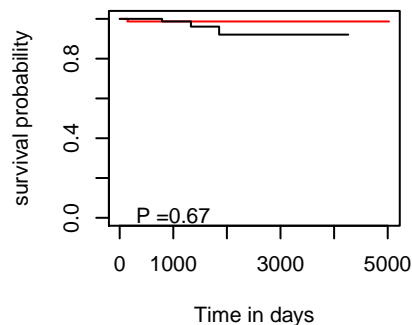

**OS hsa-mir-190b**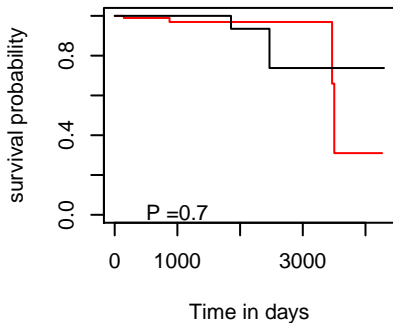**PFI hsa-mir-190b**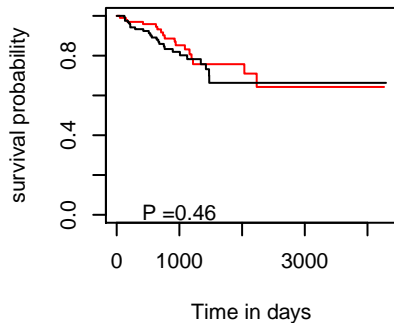**DFI hsa-mir-190b**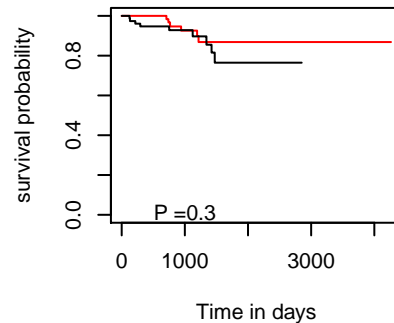**DSS hsa-mir-190b**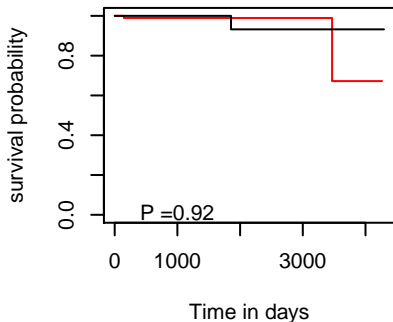**OS hsa-mir-92b**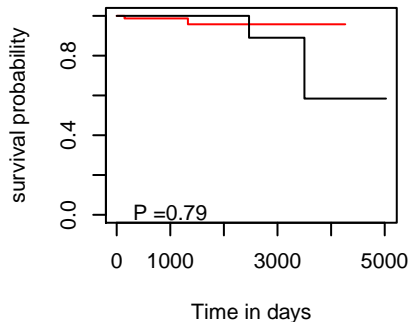**PFI hsa-mir-92b**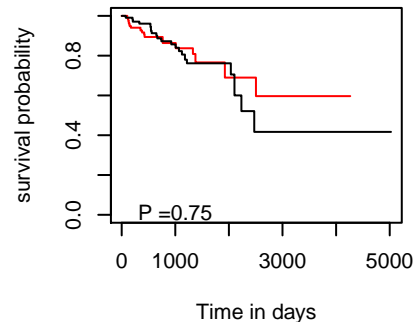**DFI hsa-mir-92b**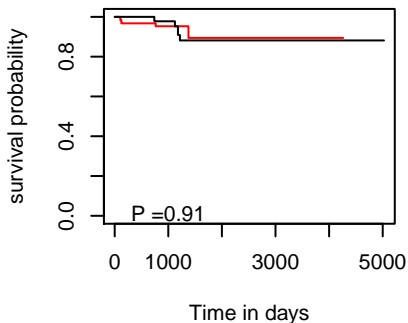**DSS hsa-mir-92b**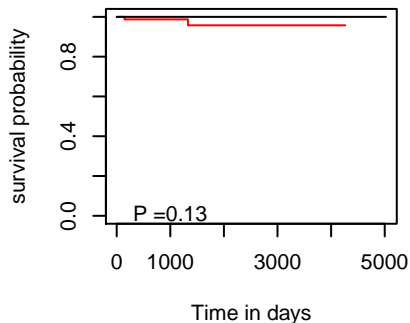**OS hsa-mir-181b-2**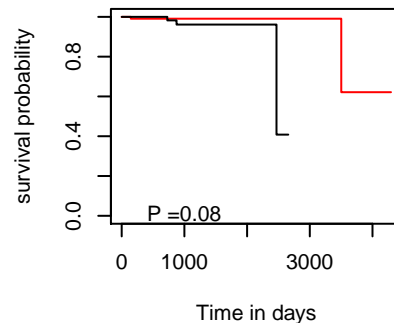

**PFI hsa-mir-181b-2**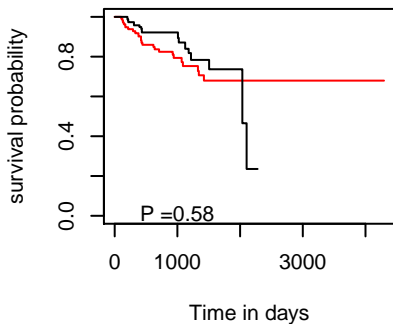**DFI hsa-mir-181b-2**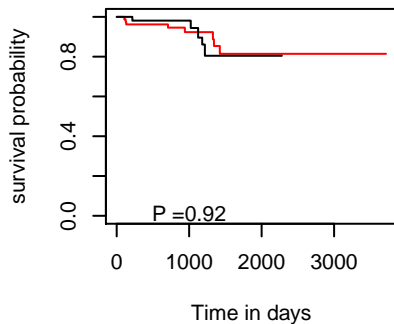**DSS hsa-mir-181b-2**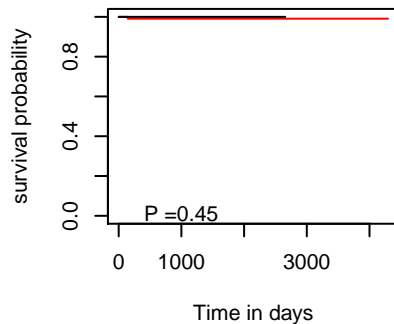**OS hsa-mir-5687**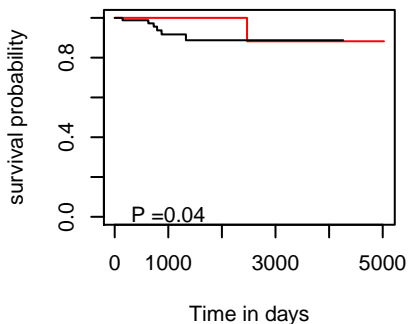**PFI hsa-mir-5687**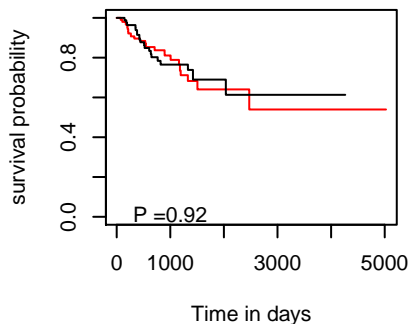**DFI hsa-mir-5687**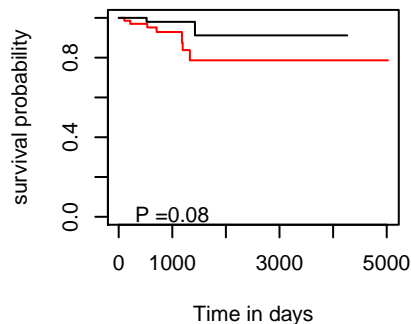**DSS hsa-mir-5687**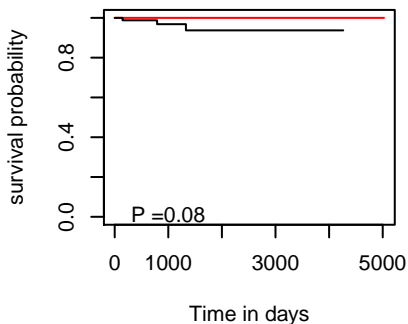**OS hsa-mir-3664**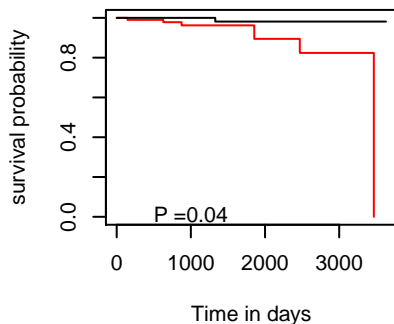**PFI hsa-mir-3664**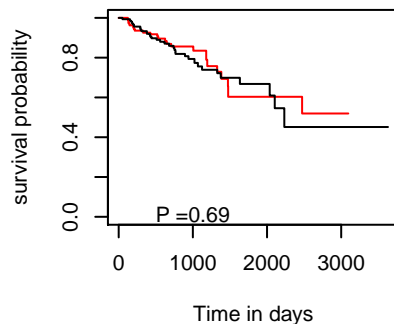

**DFI hsa-mir-3664**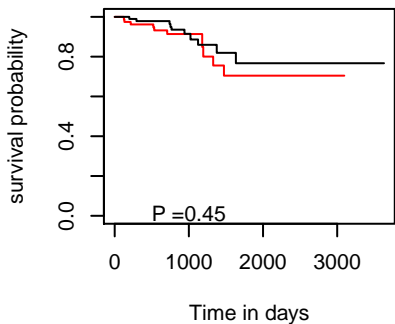**DSS hsa-mir-3664**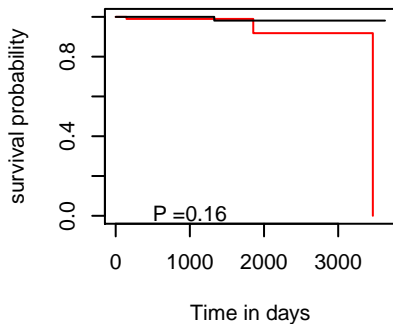**OS hsa-mir-346**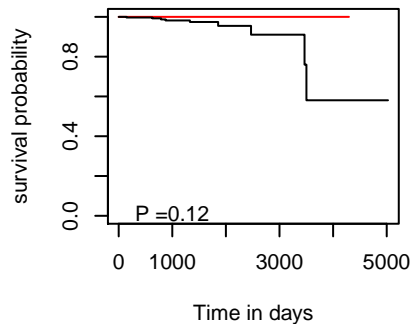**PFI hsa-mir-346**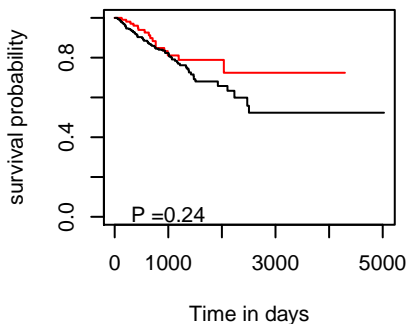**DFI hsa-mir-346**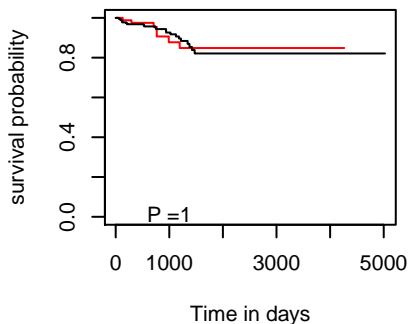**DSS hsa-mir-346**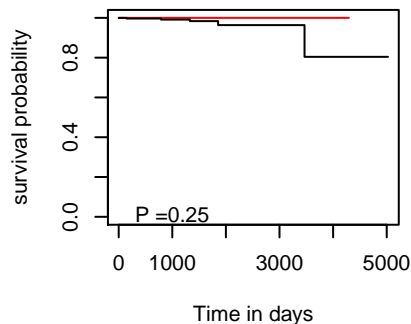**OS hsa-mir-3158-2**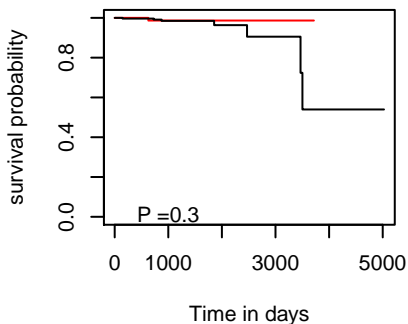**PFI hsa-mir-3158-2**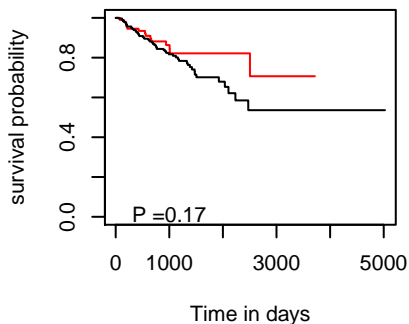**DFI hsa-mir-3158-2**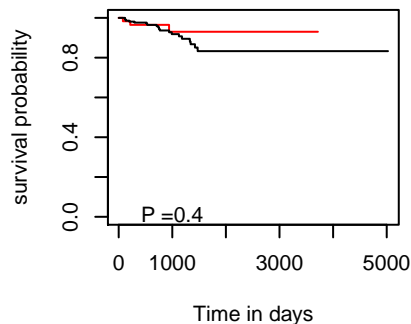

DSS hsa-mir-3158-2

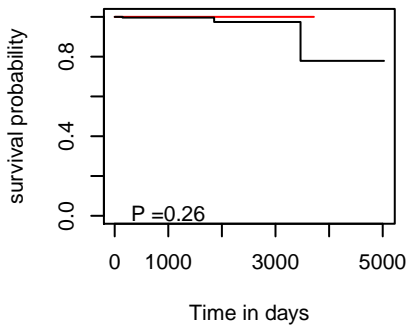

OS hsa-mir-581

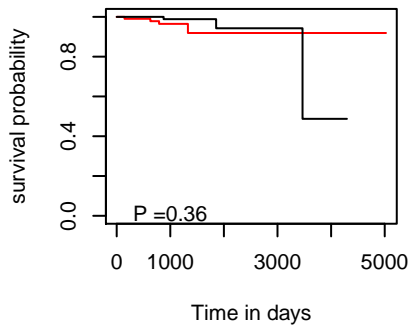

PFI hsa-mir-581

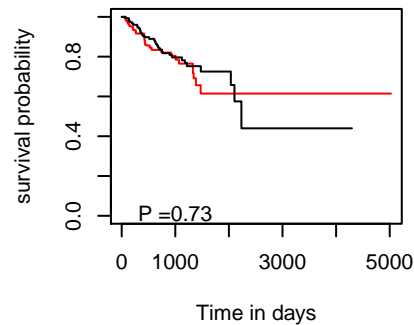

DFI hsa-mir-581

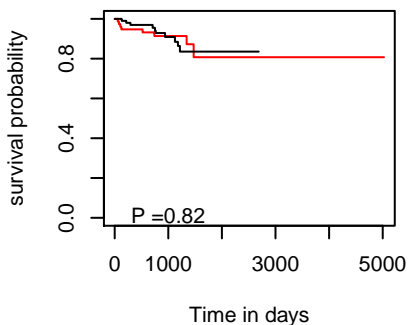

DSS hsa-mir-581

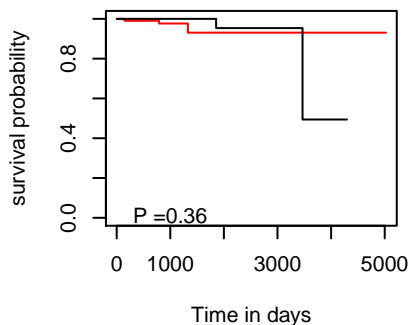

OS hsa-mir-152

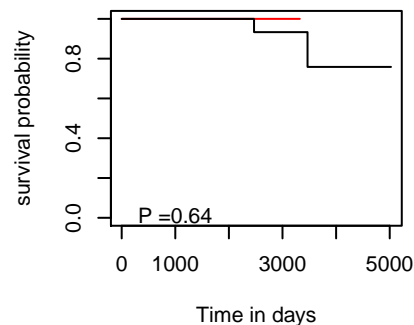

PFI hsa-mir-152

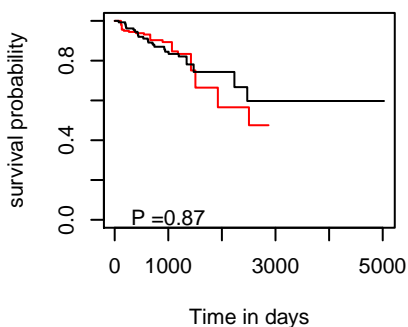

DFI hsa-mir-152

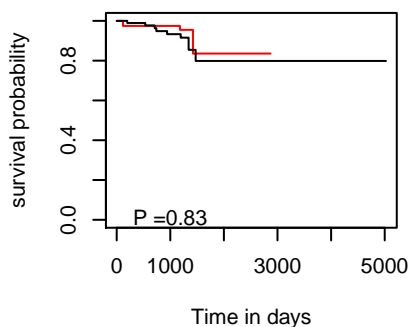

DSS hsa-mir-152

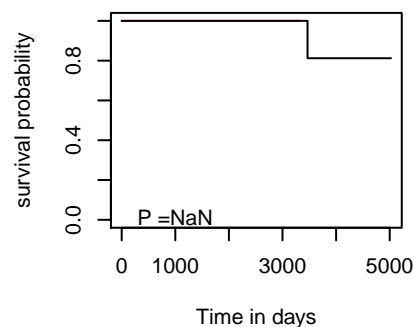

**OS hsa-mir-1284**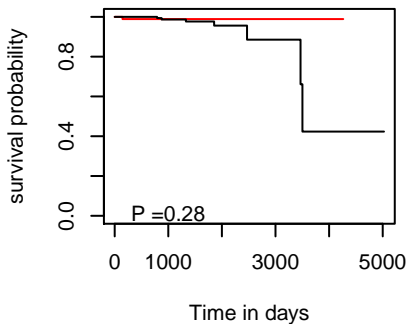**PFI hsa-mir-1284**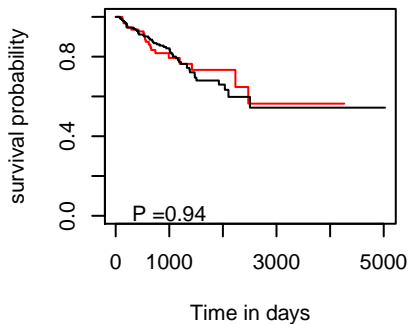**DFI hsa-mir-1284**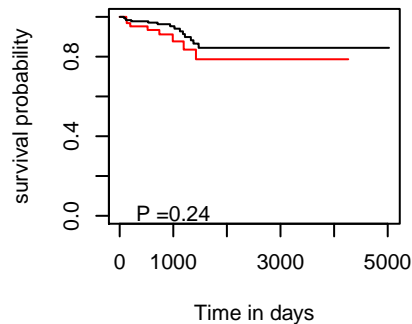**DSS hsa-mir-1284**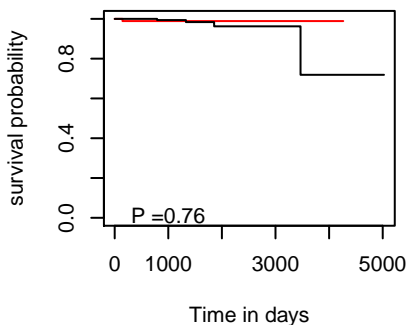**OS hsa-mir-140**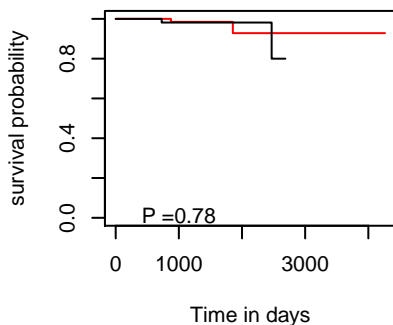**PFI hsa-mir-140**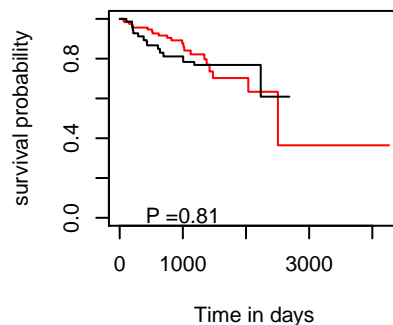**DFI hsa-mir-140**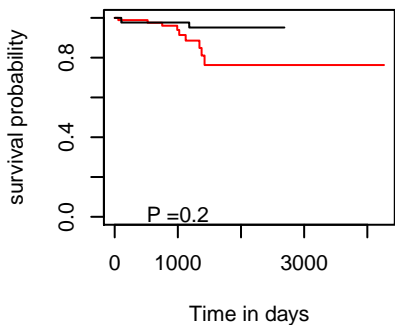**DSS hsa-mir-140**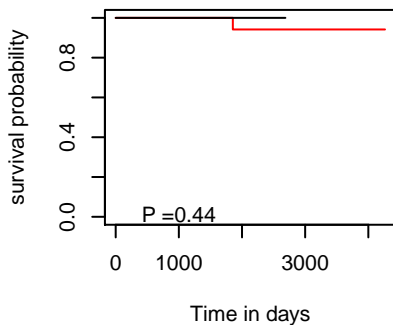**OS hsa-mir-383**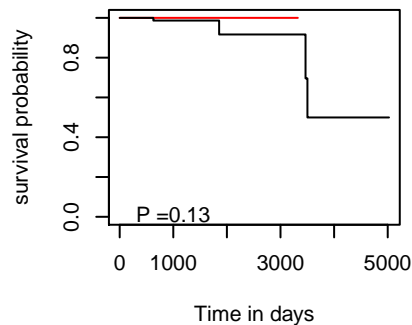

**PFI hsa-mir-383**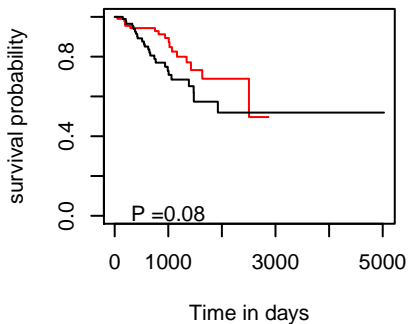**DFI hsa-mir-383**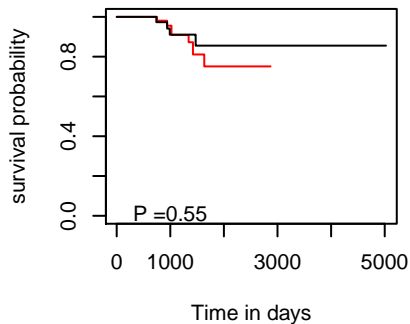**DSS hsa-mir-383**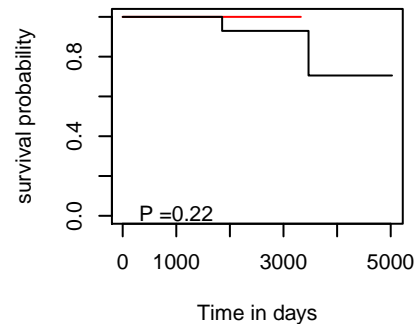**OS hsa-mir-2277**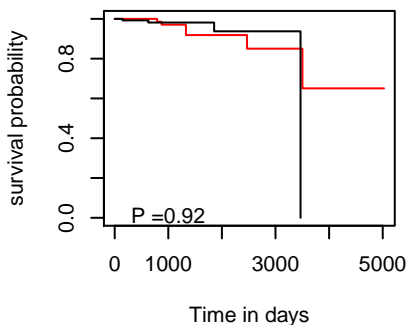**PFI hsa-mir-2277**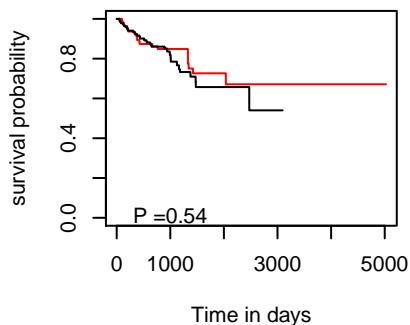**DFI hsa-mir-2277**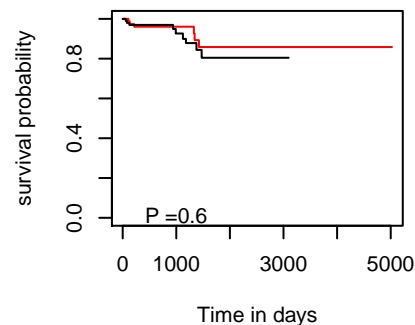**DSS hsa-mir-2277**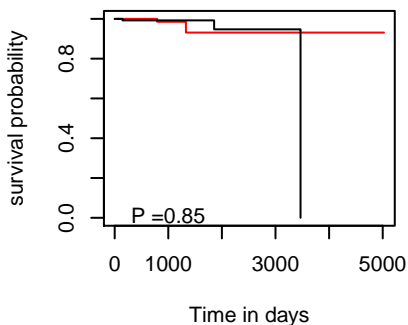**OS hsa-mir-3150b**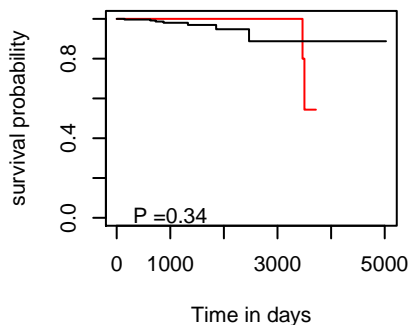**PFI hsa-mir-3150b**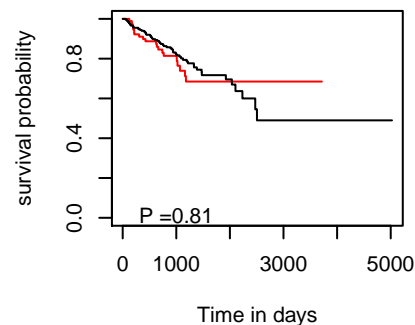

**DFI hsa-mir-3150b**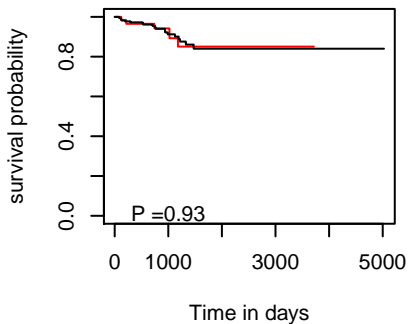**DSS hsa-mir-3150b**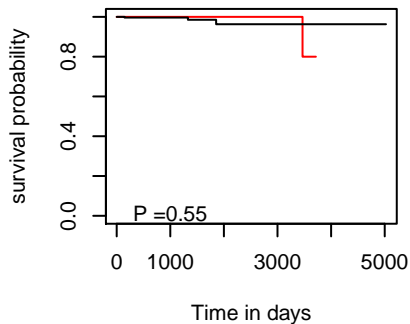**OS hsa-mir-551b**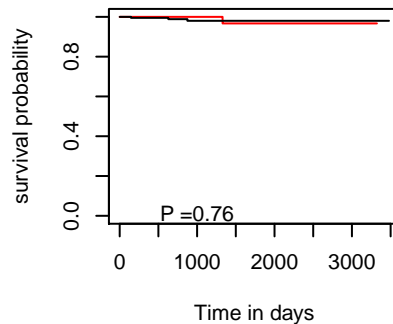**PFI hsa-mir-551b**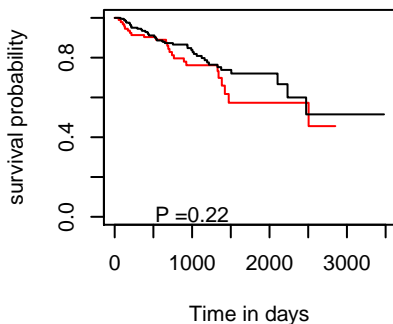**DFI hsa-mir-551b**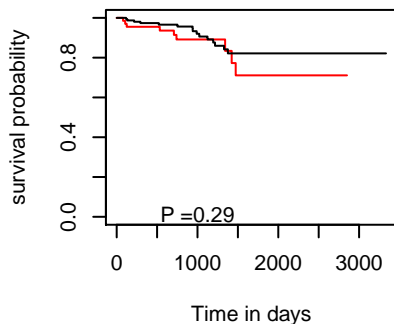**DSS hsa-mir-551b**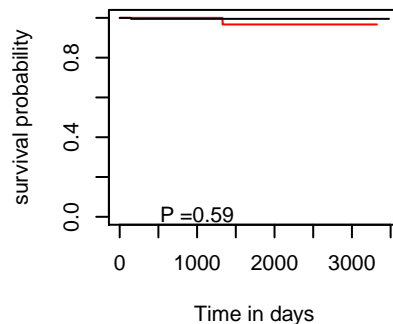**OS hsa-mir-3157**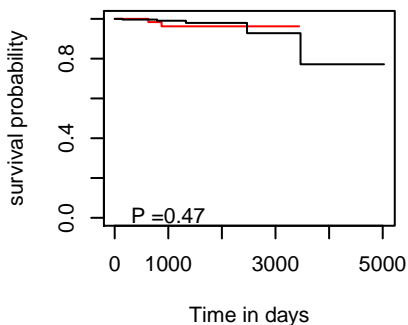**PFI hsa-mir-3157**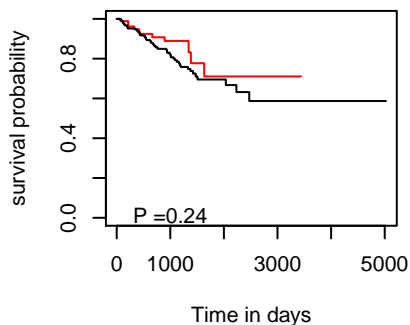**DFI hsa-mir-3157**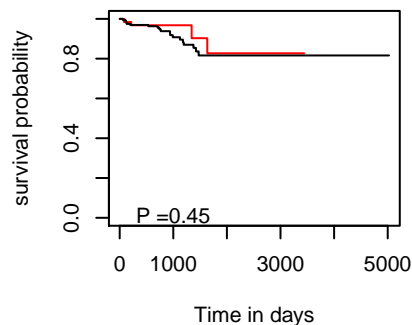

DSS hsa-mir-3157

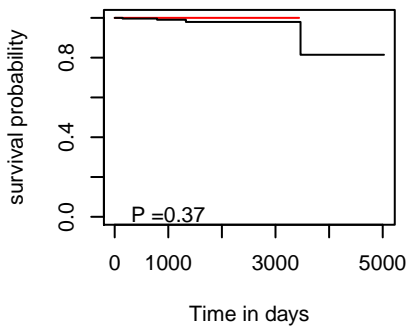

Supplement: MOESM25 [file 41598_2022_7628_MOESM25_ESM.pdf]
