# Supplementary material for: New Thinking on Read-Aloud.
Source: Springer Nature journal article supplement (doi:10.1038/s41598-022-07628-z), 2001-01-01

# Computing microRNA-gene interaction networks in pan-cancer using miRDriver

Banabithi Bose, Matthew Moravec, and Serdar Bozdog

# Supplemental Figure S18

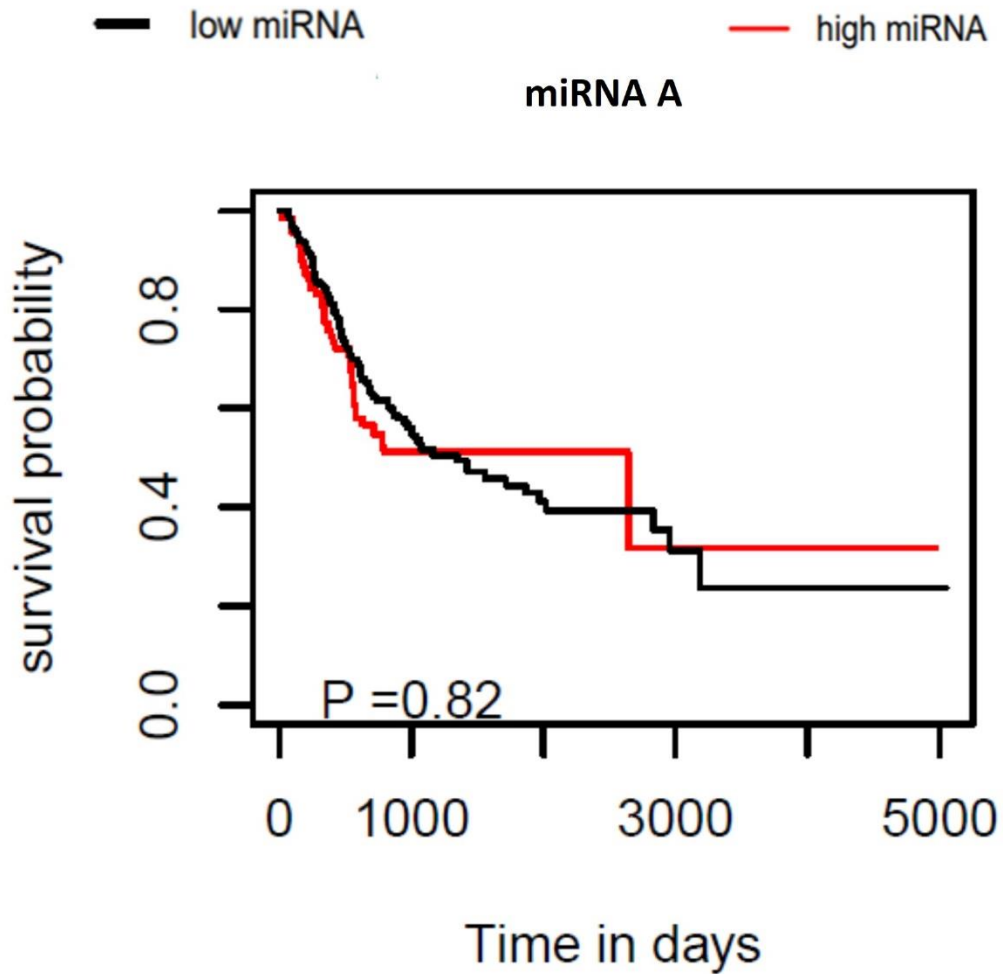

The *Adjusted Kaplan-Meier* survival plots for the computed miRNAs in high and low miRNA expression patient groups.

# Supplemental Figure S18

## Cancer Type: UCEC

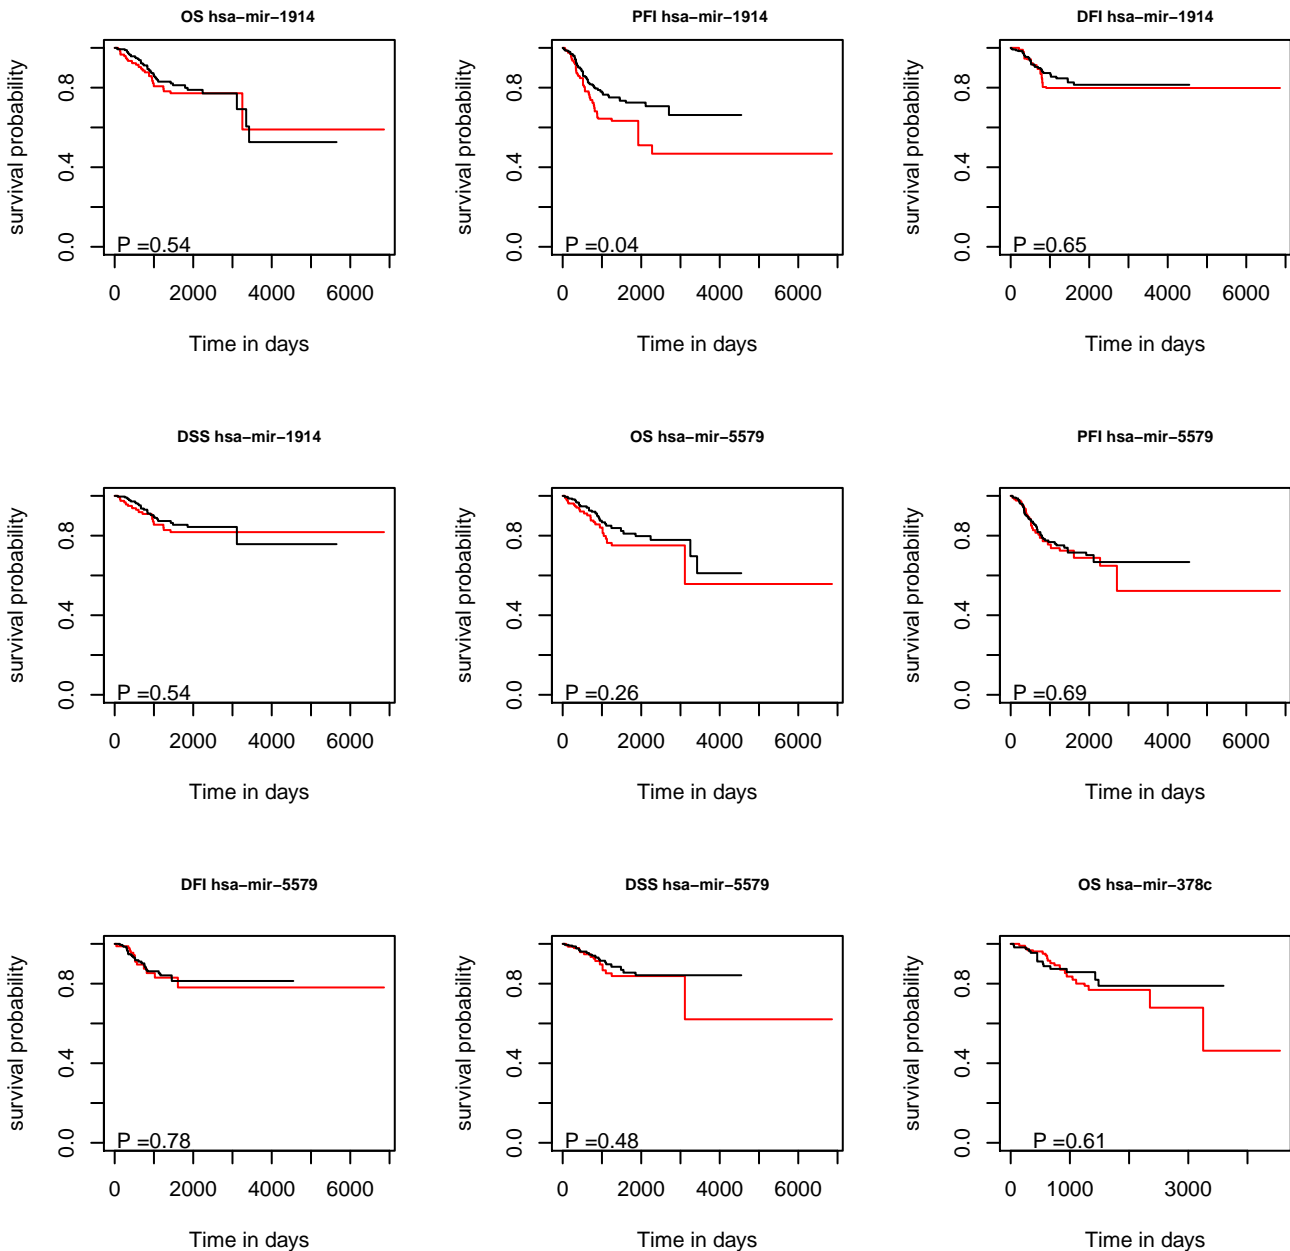

**PFI hsa-mir-378c**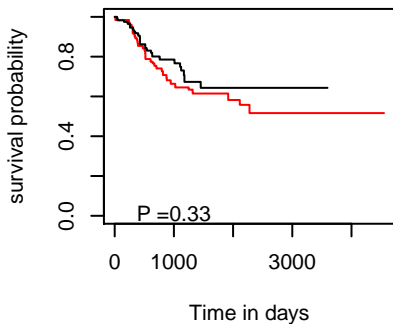**DFI hsa-mir-378c**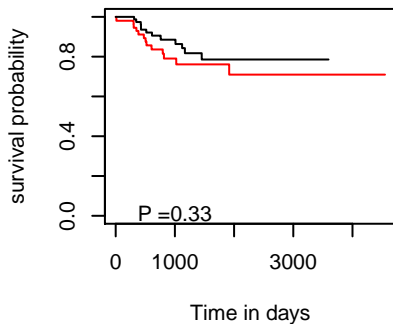**DSS hsa-mir-378c**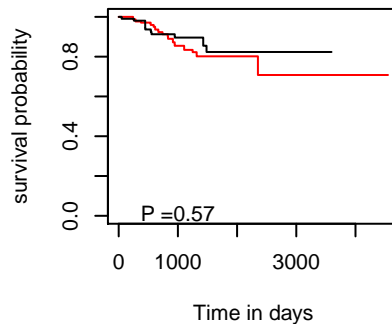**OS hsa-mir-365b**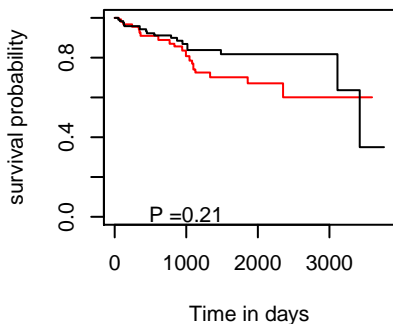**PFI hsa-mir-365b**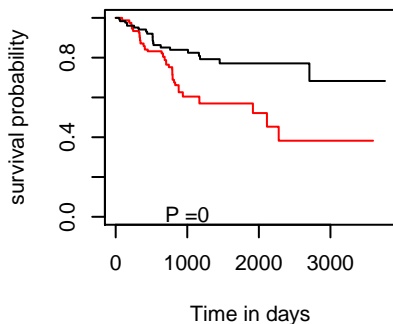**DFI hsa-mir-365b**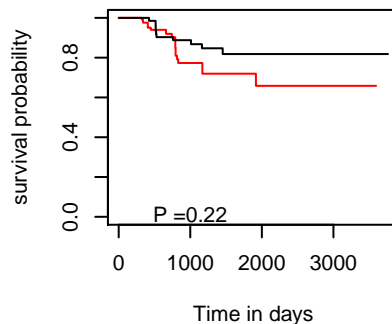**DSS hsa-mir-365b**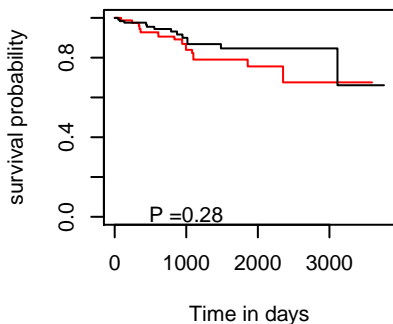**OS hsa-mir-4676**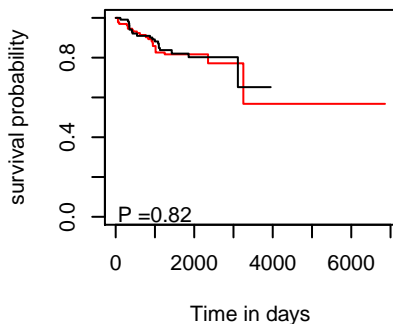**PFI hsa-mir-4676**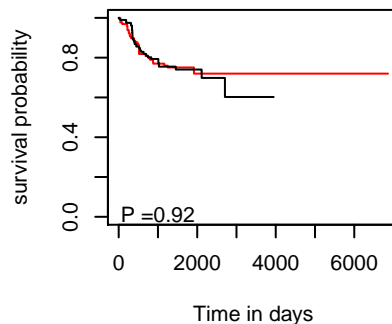

**DFI hsa-mir-4676**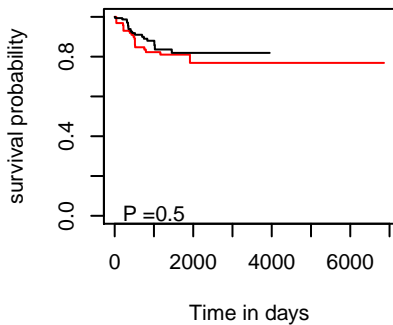**DSS hsa-mir-4676**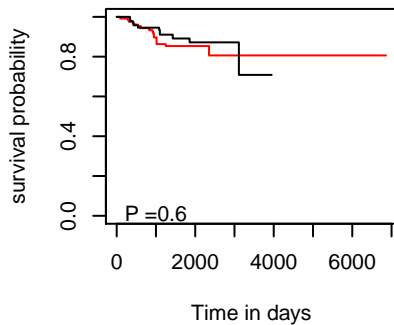**OS hsa-mir-8072**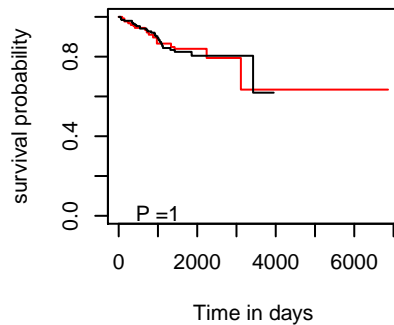**PFI hsa-mir-8072**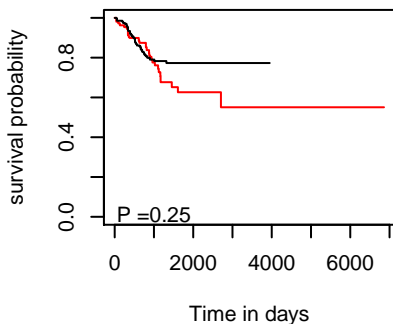**DFI hsa-mir-8072**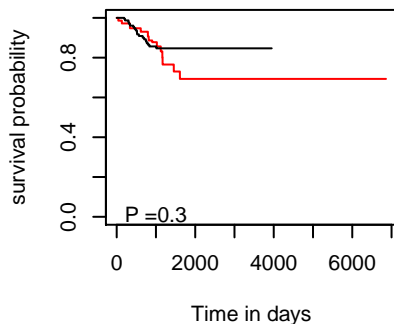**DSS hsa-mir-8072**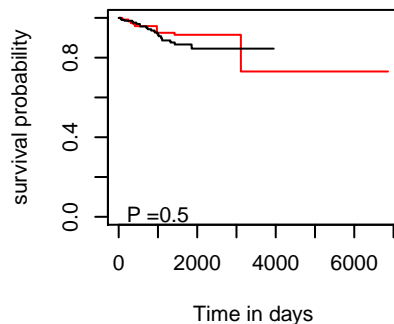**OS hsa-mir-101-2**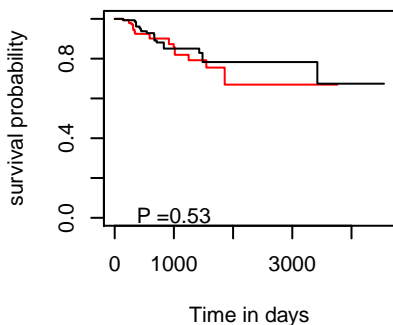**PFI hsa-mir-101-2**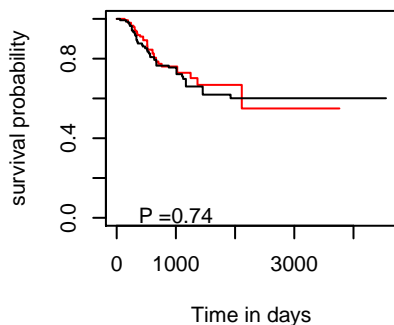**DFI hsa-mir-101-2**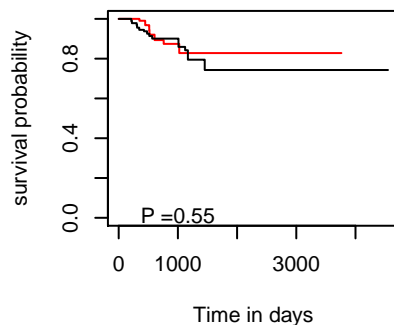

**DSS hsa-mir-101-2**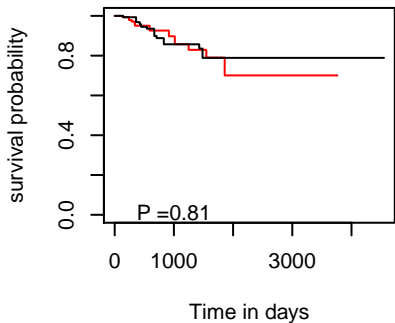**OS hsa-mir-1287**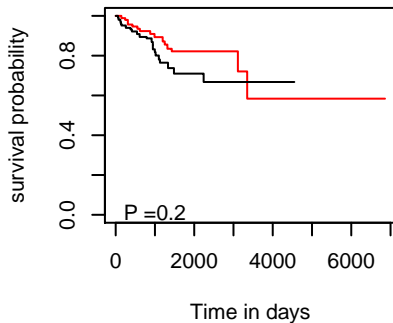**PFI hsa-mir-1287**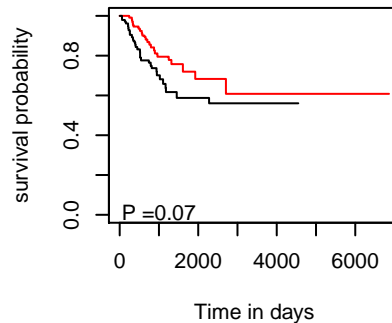**DFI hsa-mir-1287**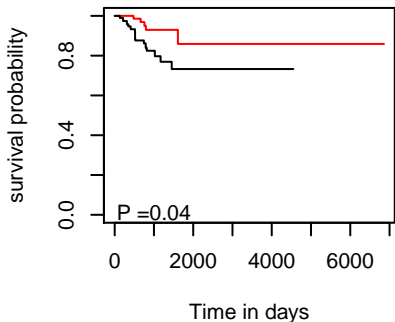**DSS hsa-mir-1287**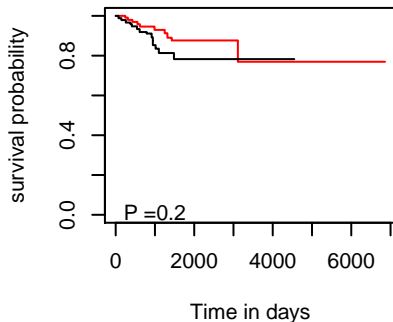**OS hsa-mir-149**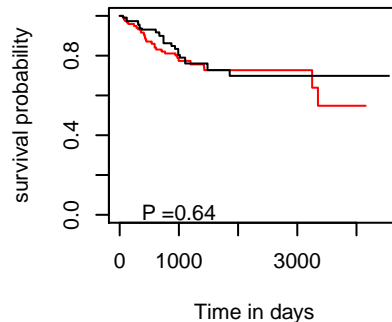**PFI hsa-mir-149**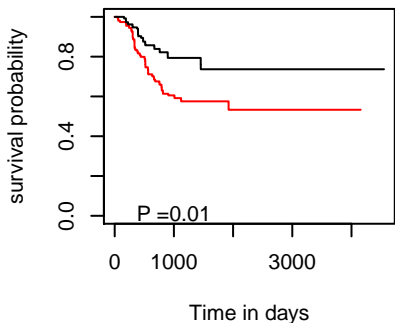**DFI hsa-mir-149**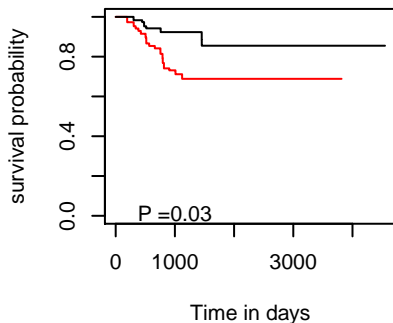**DSS hsa-mir-149**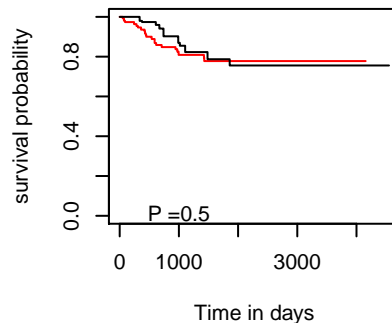

**OS hsa-mir-675**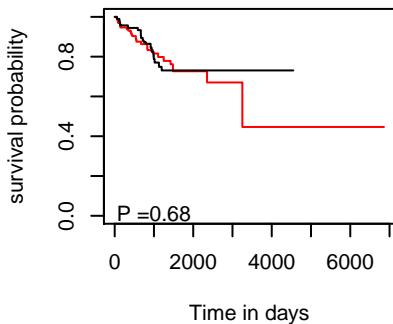**PFI hsa-mir-675**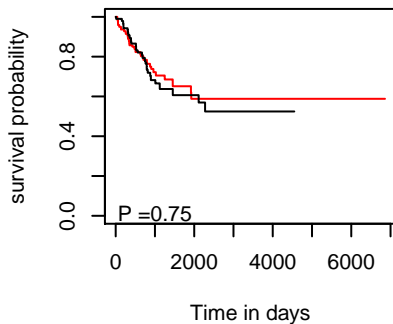**DFI hsa-mir-675**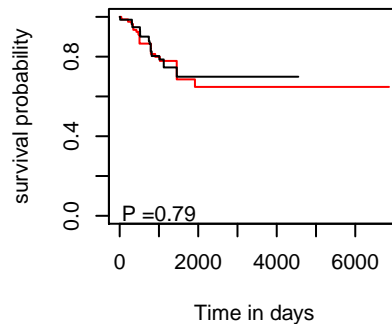**DSS hsa-mir-675**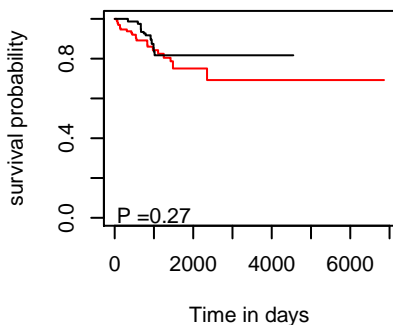**OS hsa-mir-708**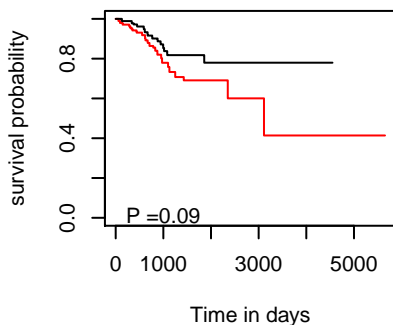**PFI hsa-mir-708**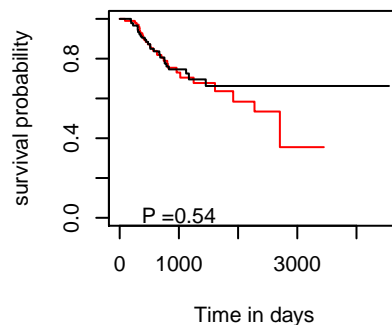**DFI hsa-mir-708**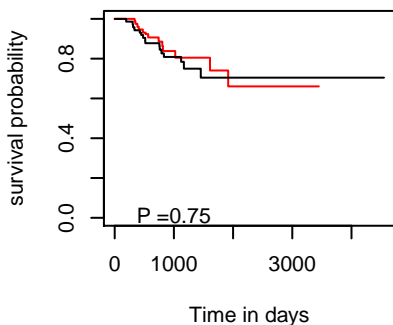**DSS hsa-mir-708**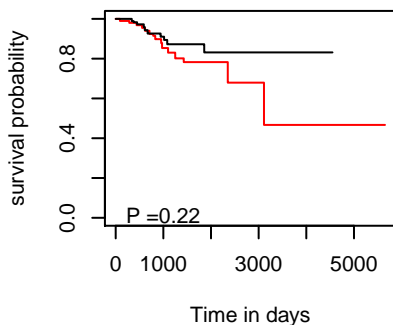**OS hsa-mir-3176**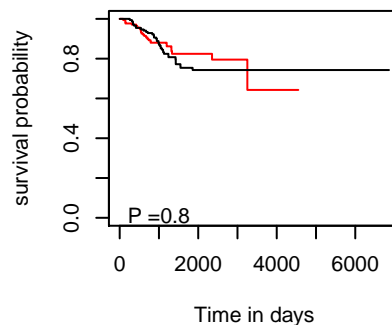

**PFI hsa-mir-3176**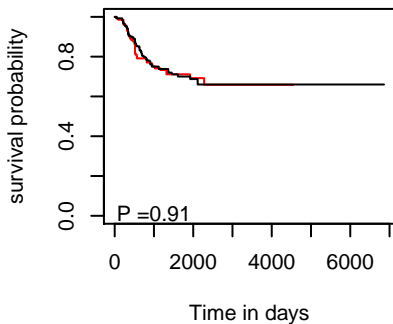**DFI hsa-mir-3176**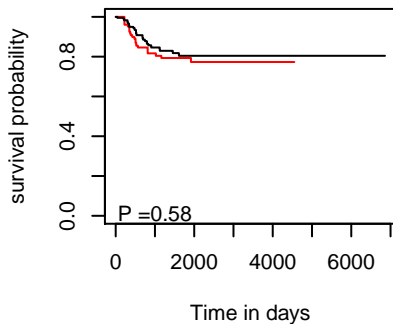**DSS hsa-mir-3176**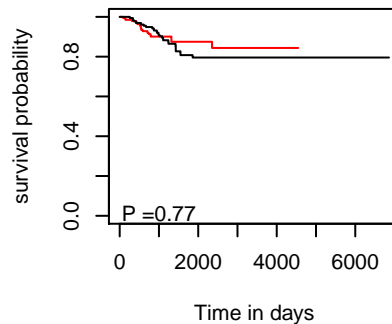**OS hsa-mir-1913**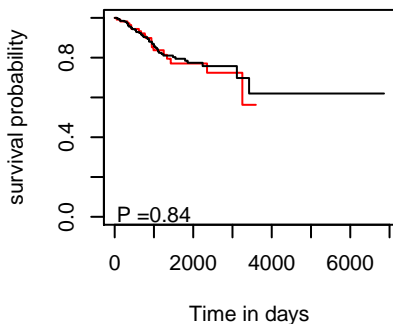**PFI hsa-mir-1913**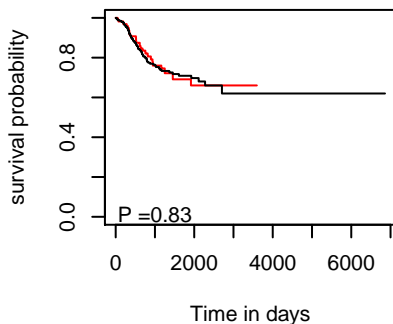**DFI hsa-mir-1913**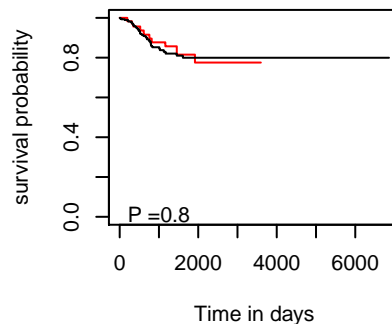**DSS hsa-mir-1913**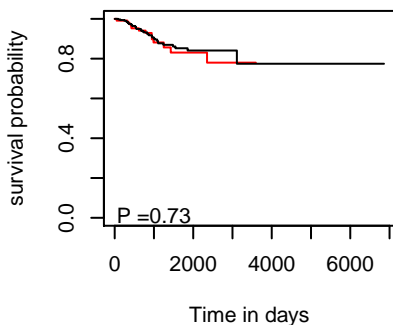**OS hsa-mir-3939**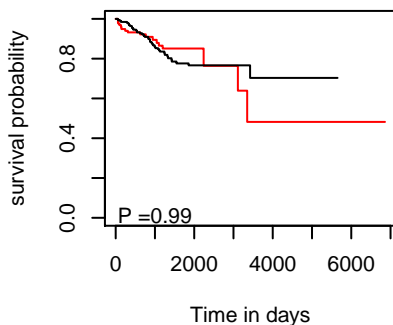**PFI hsa-mir-3939**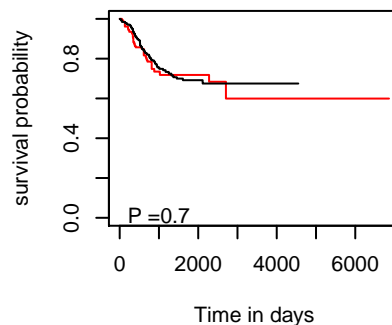



**DSS hsa-mir-5582**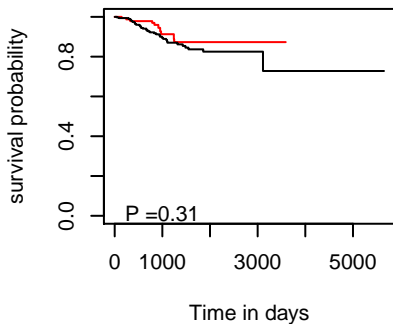**OS hsa-mir-193a**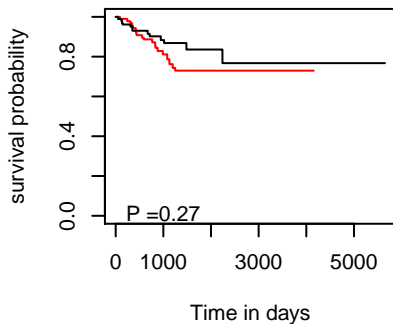**PFI hsa-mir-193a**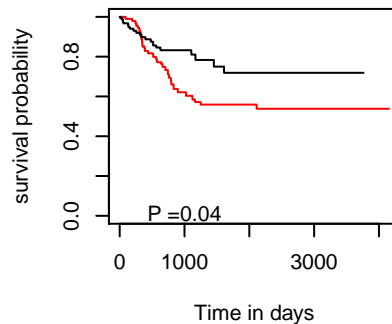**DFI hsa-mir-193a**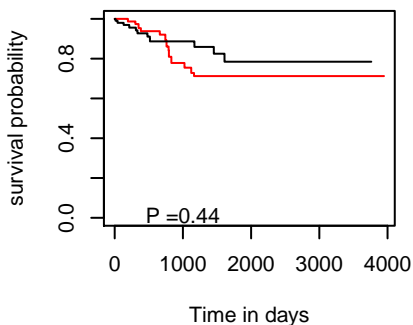**DSS hsa-mir-193a**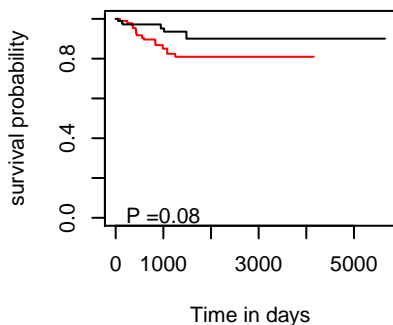**OS hsa-mir-195**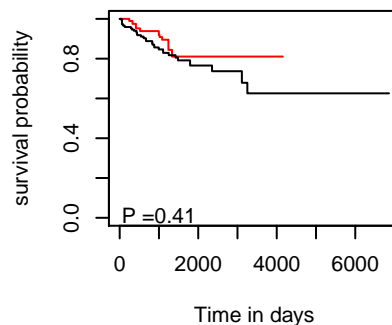**PFI hsa-mir-195**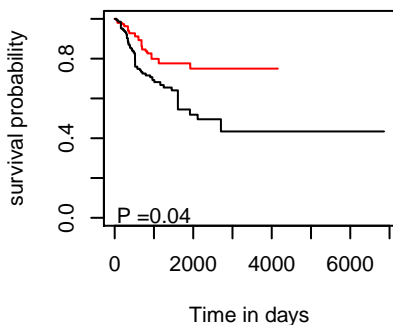**DFI hsa-mir-195**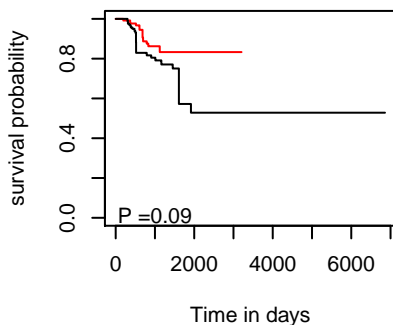**DSS hsa-mir-195**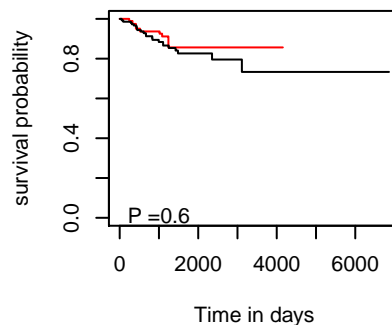

**OS hsa-mir-212**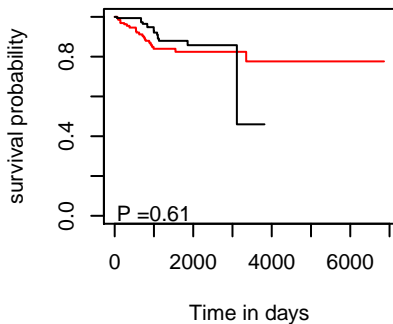**PFI hsa-mir-212**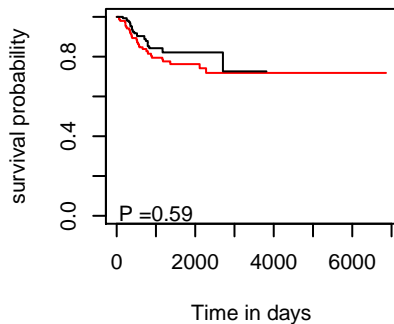**DFI hsa-mir-212**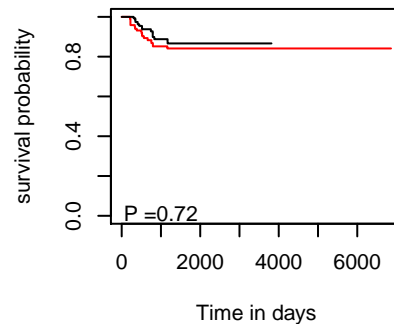**DSS hsa-mir-212**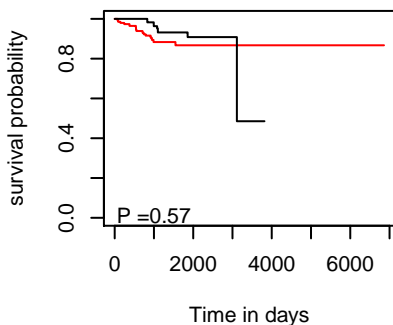**OS hsa-let-7b**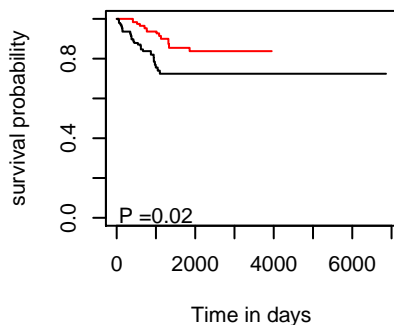**PFI hsa-let-7b**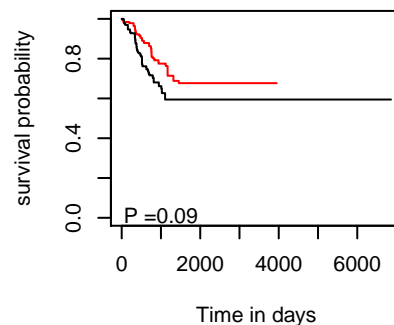**DFI hsa-let-7b**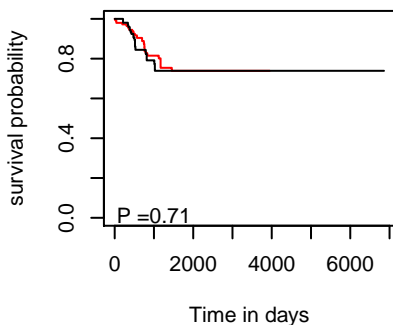**DSS hsa-let-7b**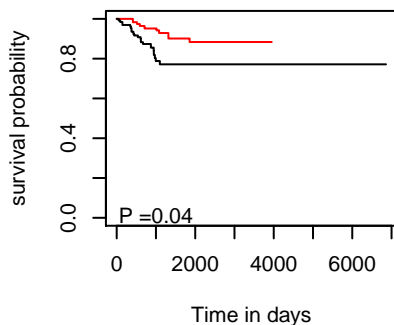**OS hsa-mir-4762**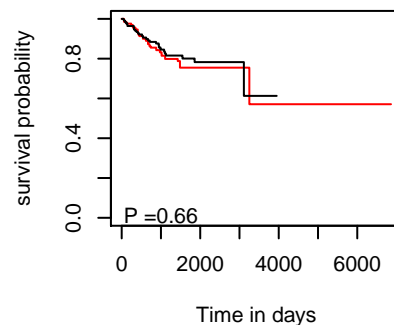

**PFI hsa-mir-4762**

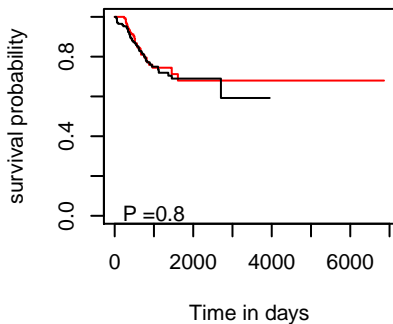

**DFI hsa-mir-4762**

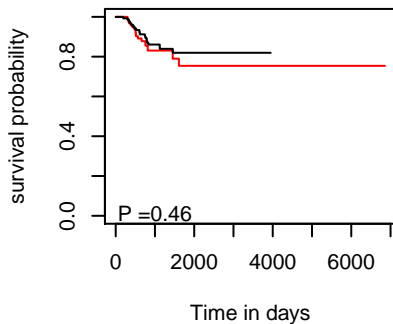

**DSS hsa-mir-4762**

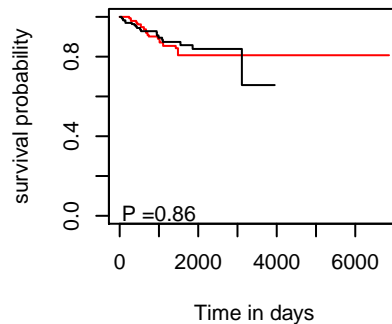

**OS hsa-mir-607**

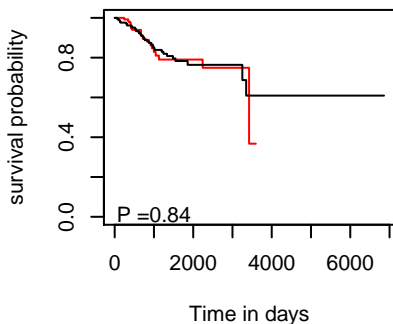

**PFI hsa-mir-607**

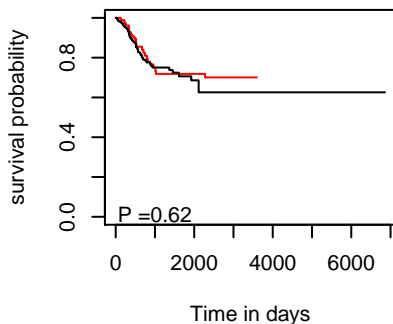

**DFI hsa-mir-607**

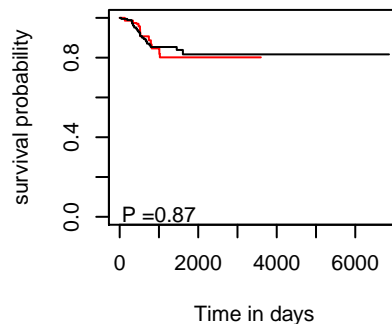

**DSS hsa-mir-607**

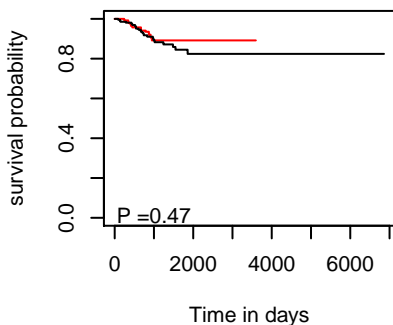

**OS hsa-mir-6842**

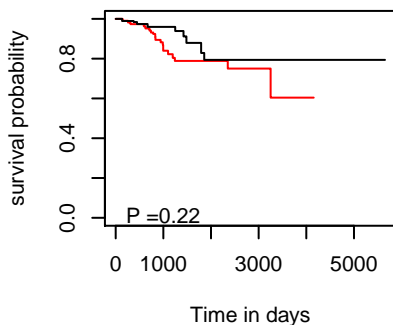

**PFI hsa-mir-6842**

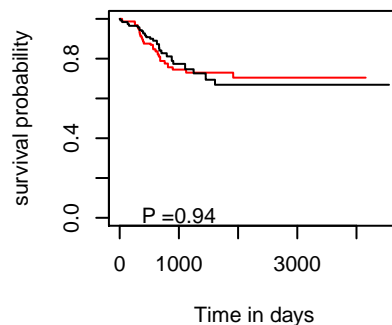

**DFI hsa-mir-6842**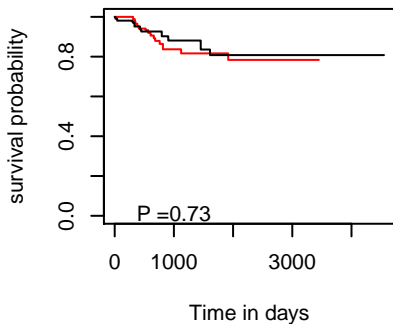**DSS hsa-mir-6842**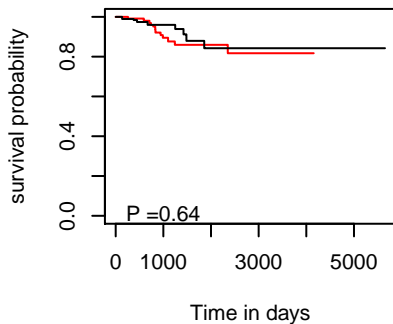**OS hsa-mir-4724**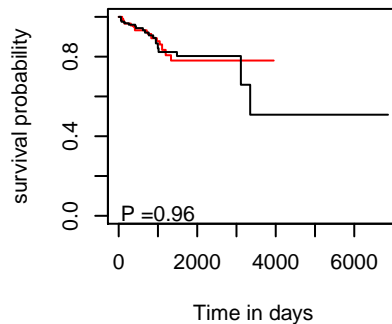**PFI hsa-mir-4724**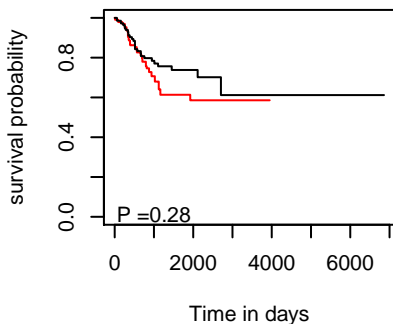**DFI hsa-mir-4724**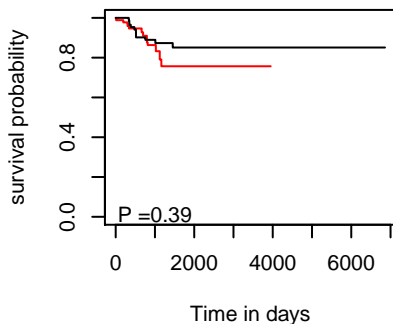**DSS hsa-mir-4724**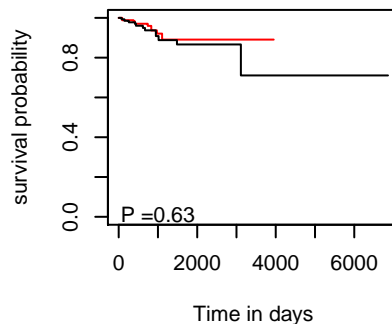**OS hsa-mir-3191**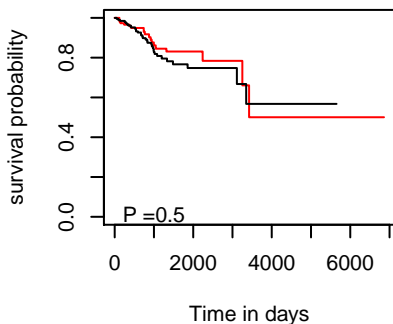**PFI hsa-mir-3191**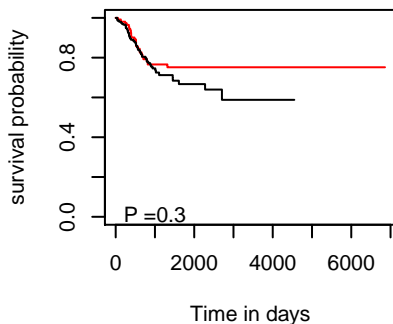**DFI hsa-mir-3191**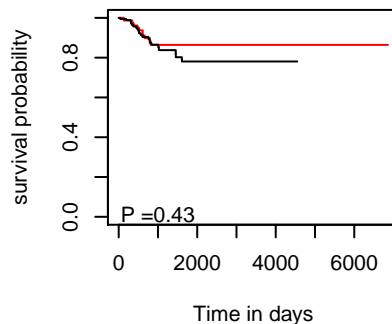

**DSS hsa-mir-3191**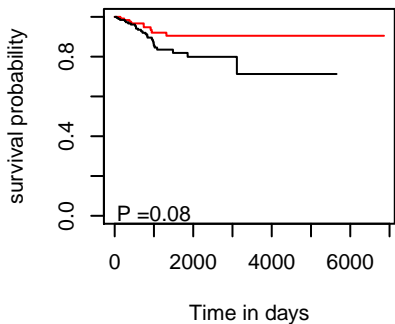**OS hsa-mir-7155**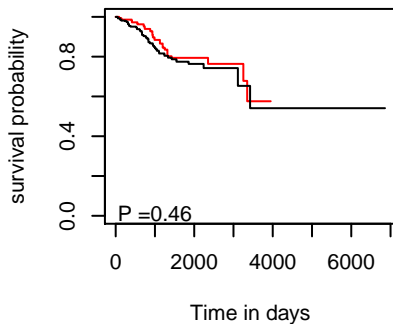**PFI hsa-mir-7155**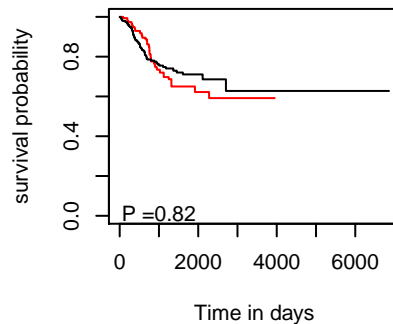**DFI hsa-mir-7155**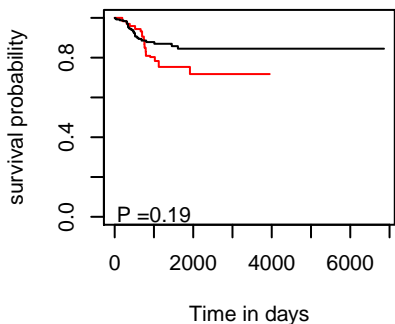**DSS hsa-mir-7155**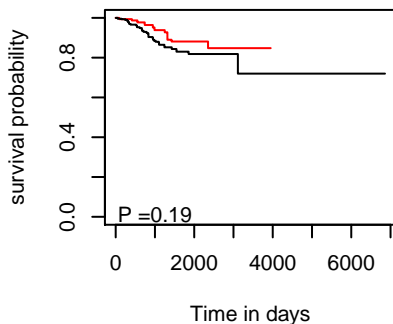**OS hsa-mir-5703**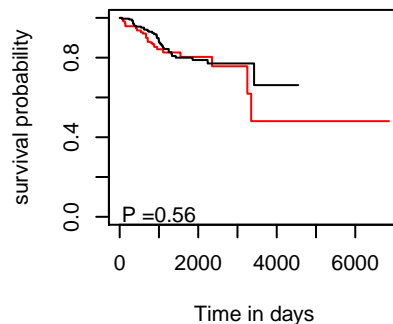**PFI hsa-mir-5703**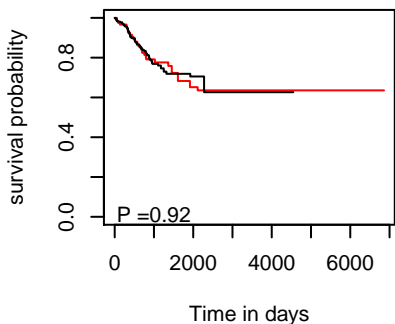**DFI hsa-mir-5703**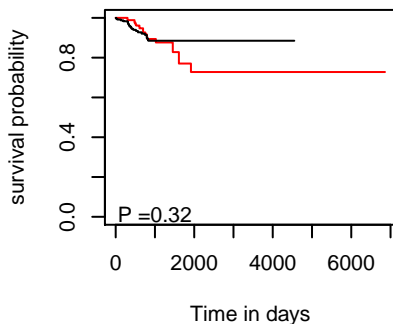**DSS hsa-mir-5703**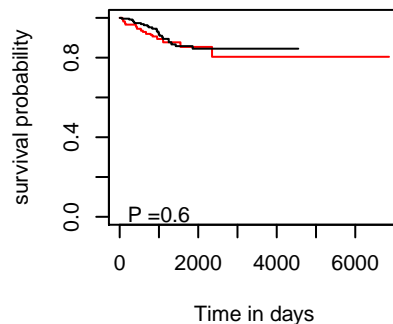

**OS hsa-mir-636**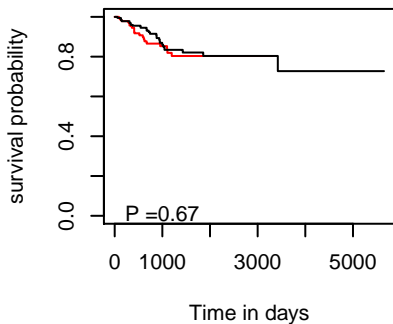**PFI hsa-mir-636**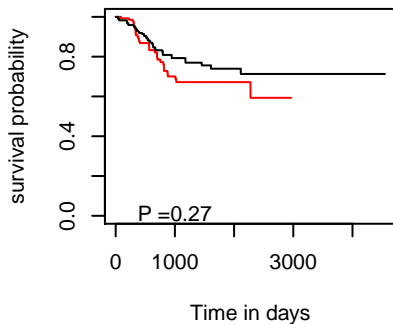**DFI hsa-mir-636**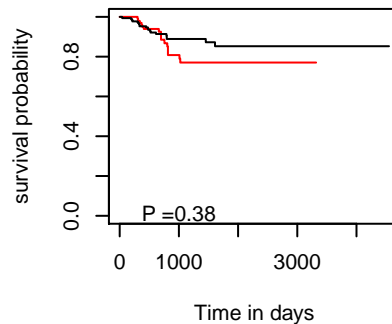**DSS hsa-mir-636**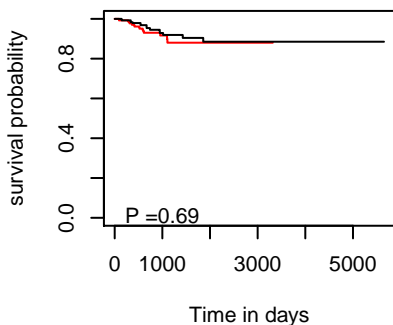**OS hsa-mir-26b**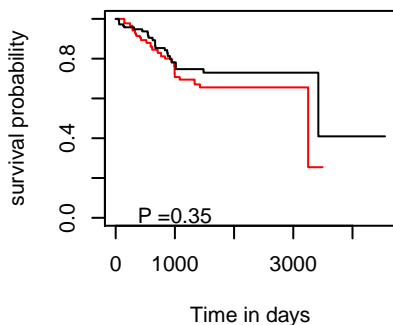**PFI hsa-mir-26b**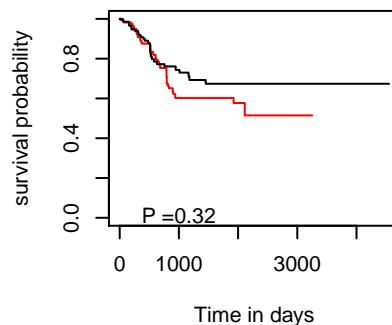**DFI hsa-mir-26b**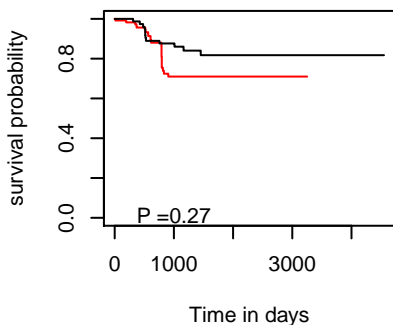**DSS hsa-mir-26b**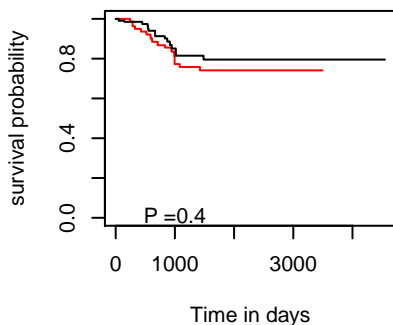**OS hsa-mir-4786**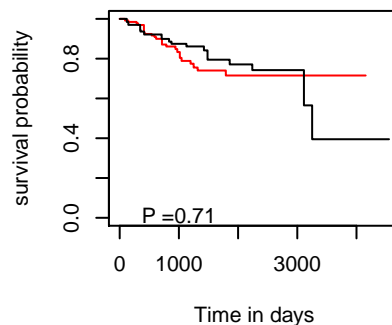

**PFI hsa-mir-4786**

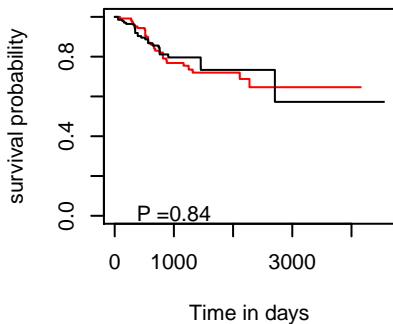

**DFI hsa-mir-4786**

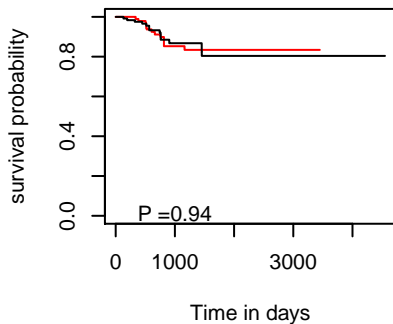

**DSS hsa-mir-4786**

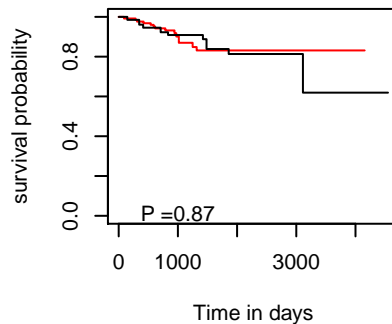

**OS hsa-mir-6818**

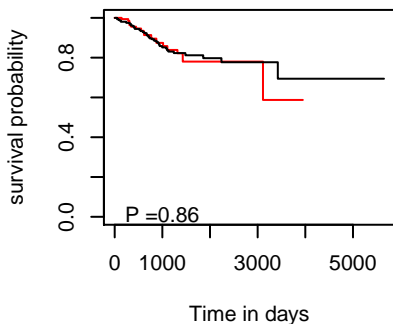

**PFI hsa-mir-6818**

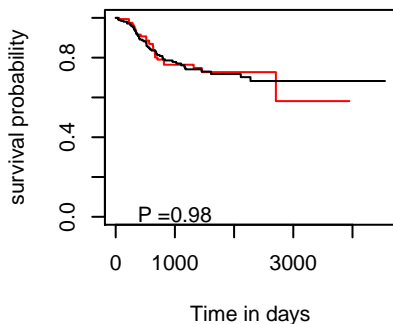

**DFI hsa-mir-6818**

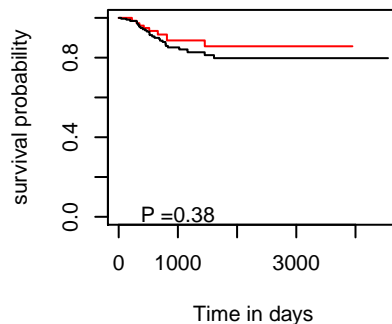

**DSS hsa-mir-6818**

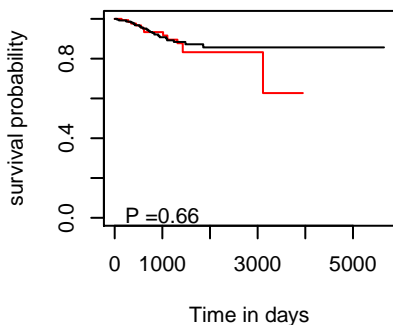

**OS hsa-mir-3200**

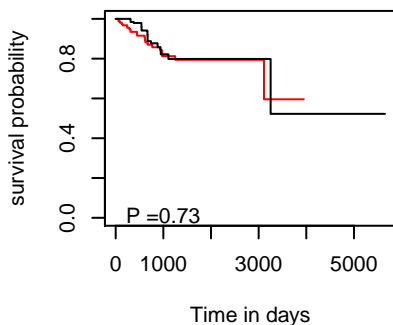

**PFI hsa-mir-3200**

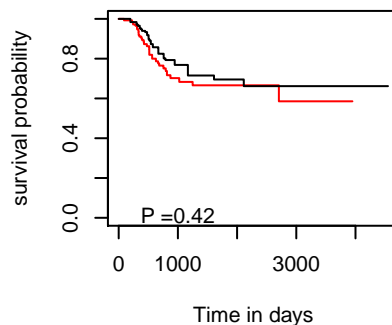

**DFI hsa-mir-3200**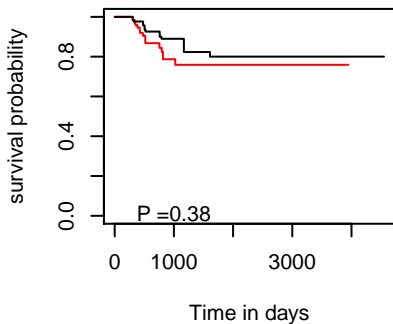**DSS hsa-mir-3200**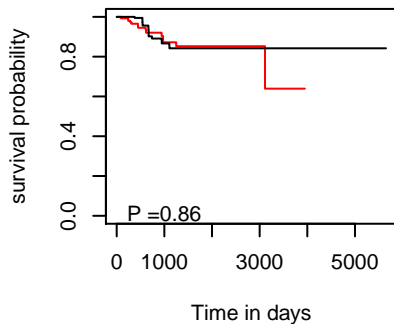**OS hsa-mir-3680-2**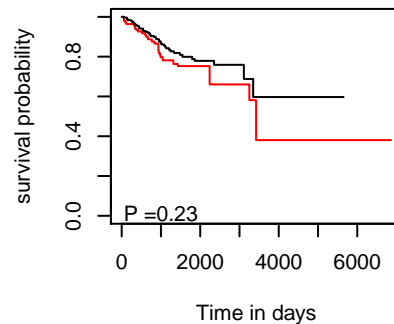**PFI hsa-mir-3680-2**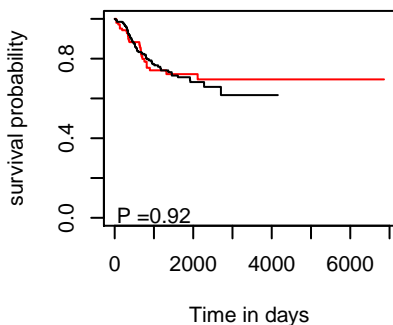**DFI hsa-mir-3680-2**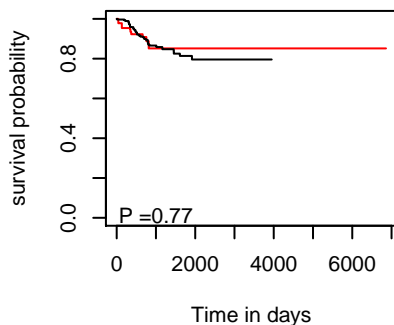**DSS hsa-mir-3680-2**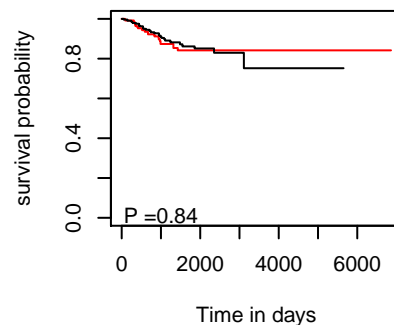**OS hsa-mir-4525**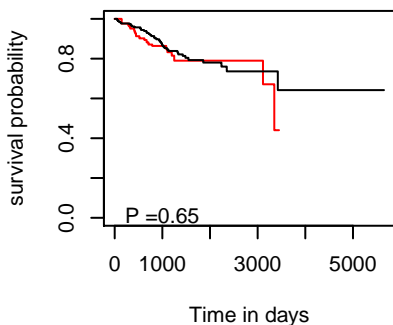**PFI hsa-mir-4525**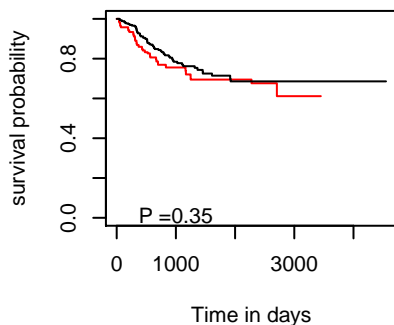**DFI hsa-mir-4525**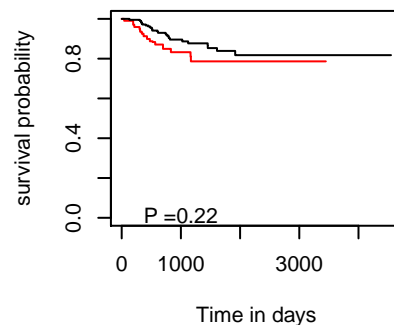

DSS hsa-mir-4525

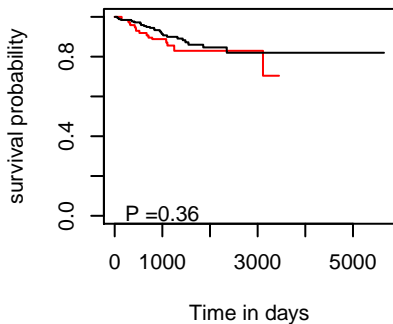

OS hsa-let-7a-2

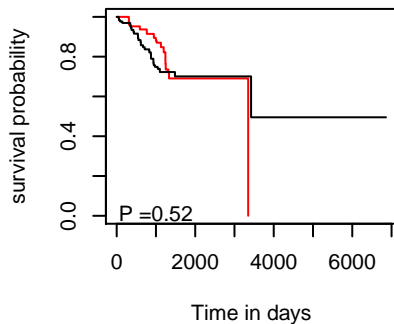

PFI hsa-let-7a-2

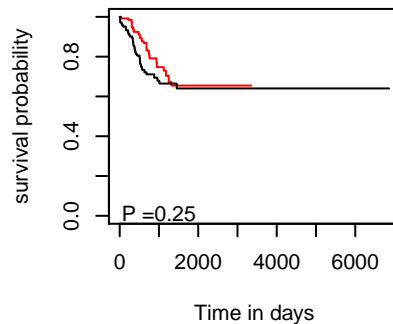

DFI hsa-let-7a-2

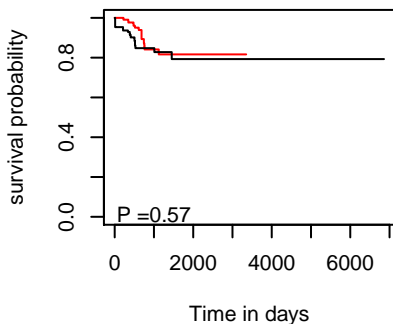

DSS hsa-let-7a-2

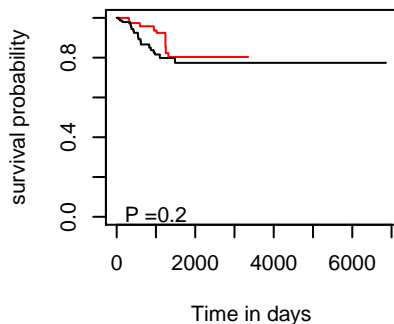

OS hsa-mir-3942

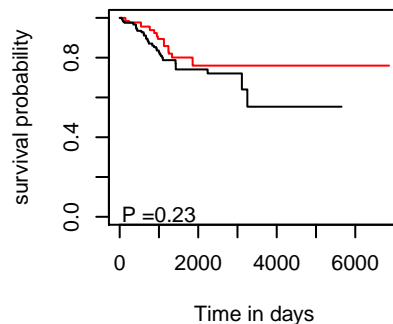

PFI hsa-mir-3942

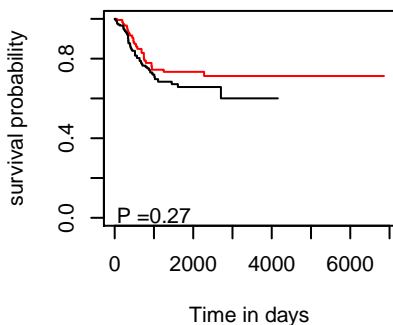

DFI hsa-mir-3942

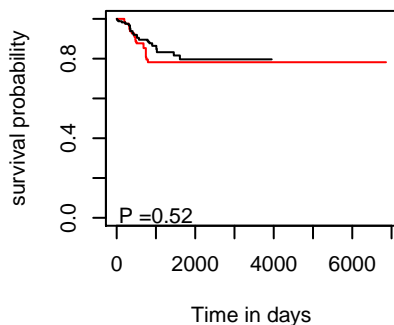

DSS hsa-mir-3942

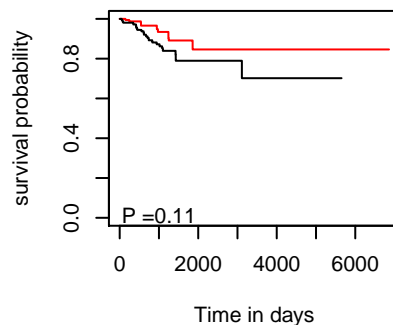

**OS hsa-mir-4491**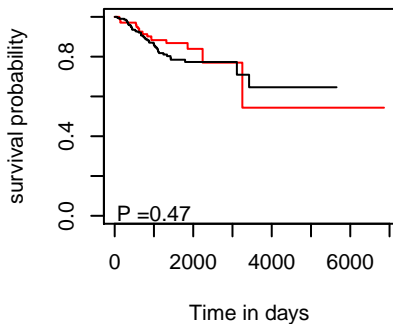**PFI hsa-mir-4491**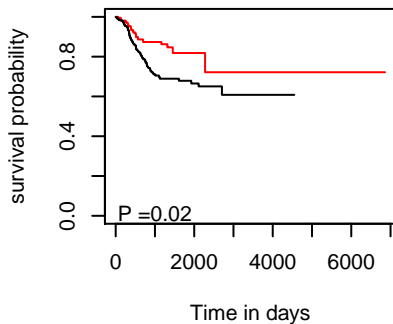**DFI hsa-mir-4491**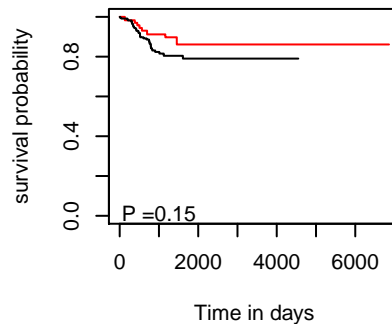**DSS hsa-mir-4491**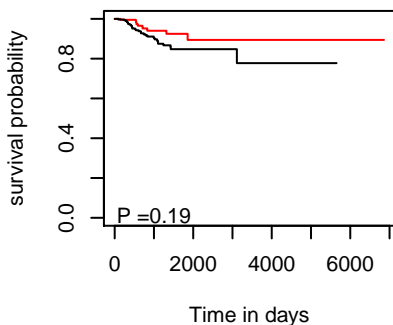**OS hsa-mir-22**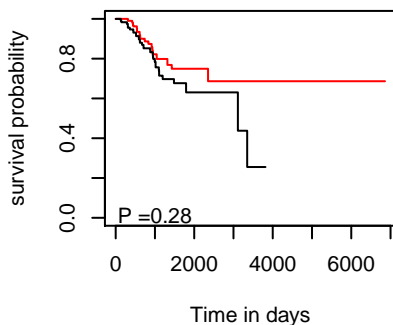**PFI hsa-mir-22**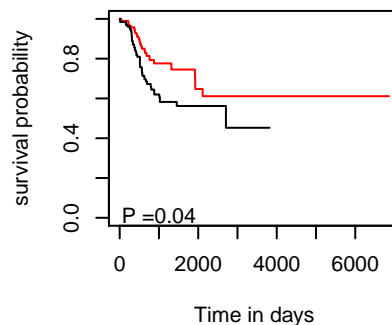**DFI hsa-mir-22**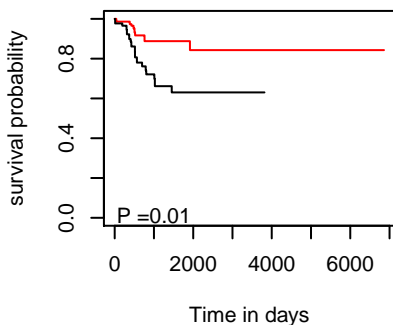**DSS hsa-mir-22**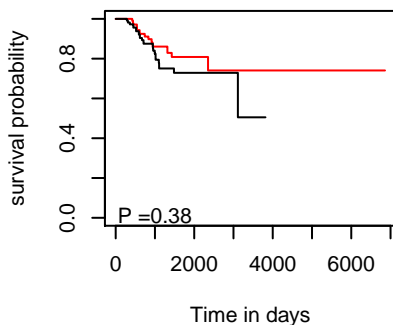**OS hsa-mir-7641-1**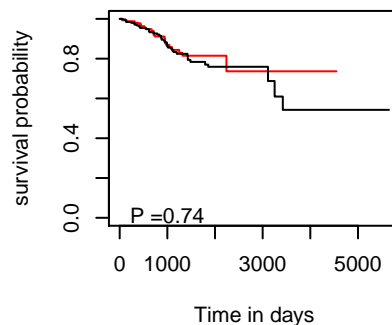

**PFI hsa-mir-7641-1**

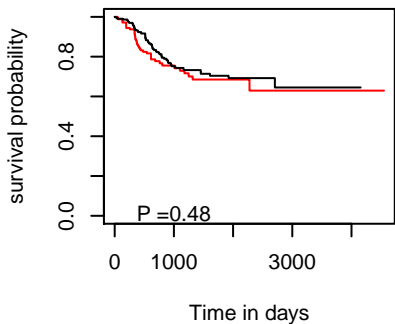

**DFI hsa-mir-7641-1**

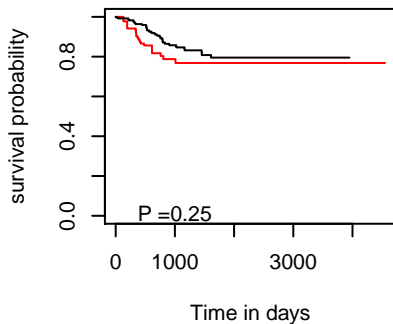

**DSS hsa-mir-7641-1**

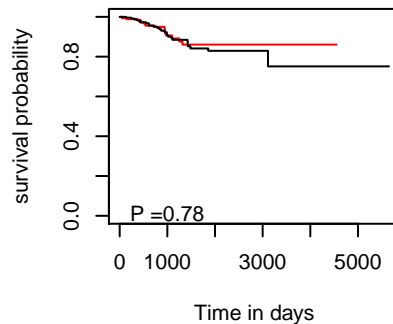

**OS hsa-mir-423**

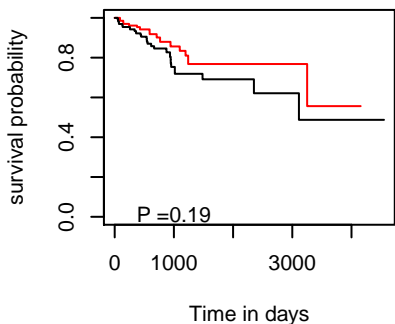

**PFI hsa-mir-423**

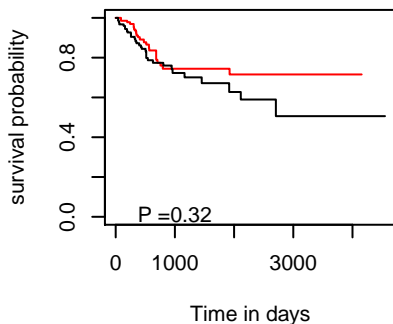

**DFI hsa-mir-423**

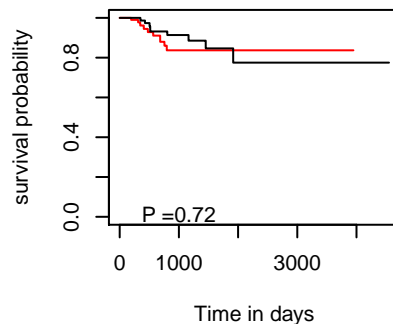

**DSS hsa-mir-423**

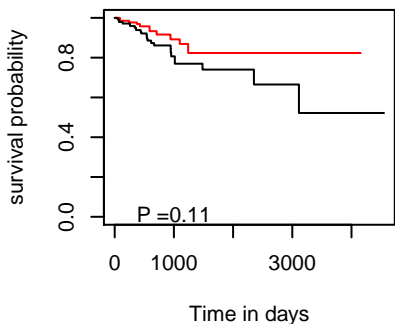

**OS hsa-mir-4519**

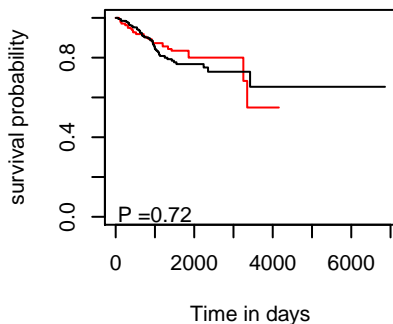

**PFI hsa-mir-4519**

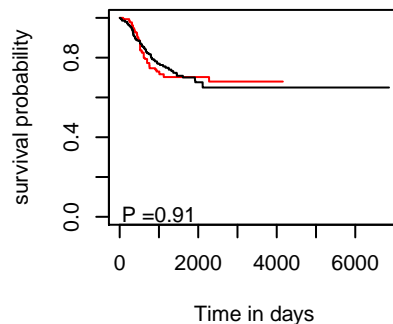

**DFI hsa-mir-4519**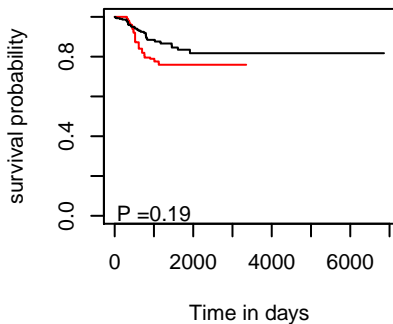**DSS hsa-mir-4519**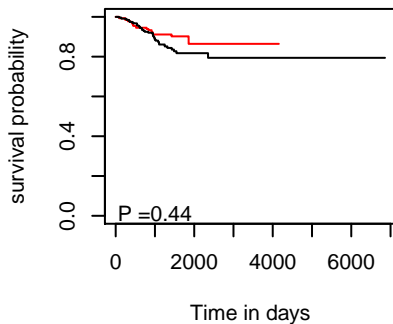**OS hsa-mir-107**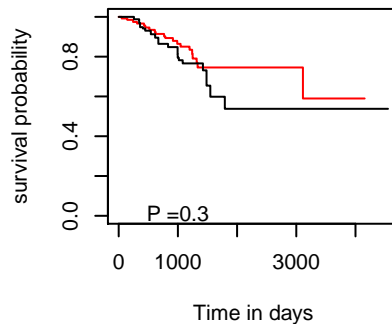**PFI hsa-mir-107**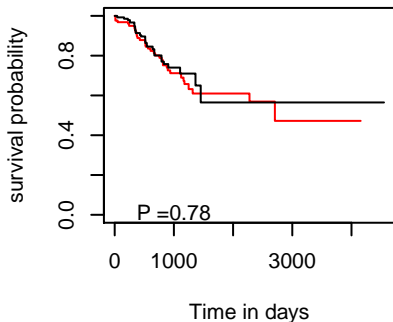**DFI hsa-mir-107**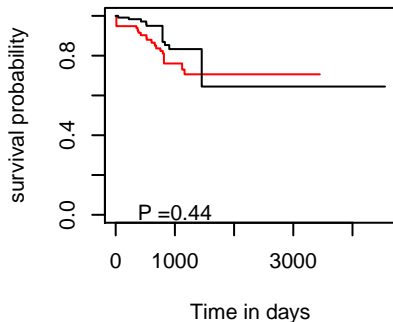**DSS hsa-mir-107**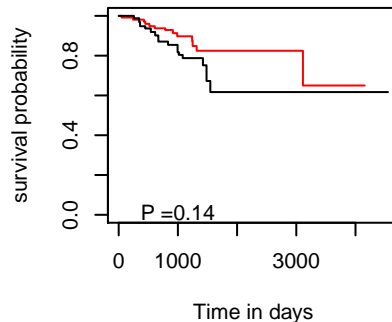**OS hsa-mir-1307**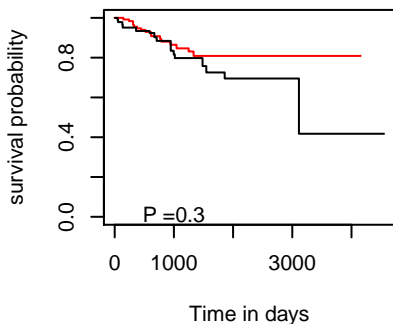**PFI hsa-mir-1307**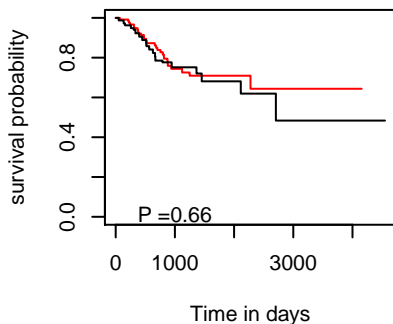**DFI hsa-mir-1307**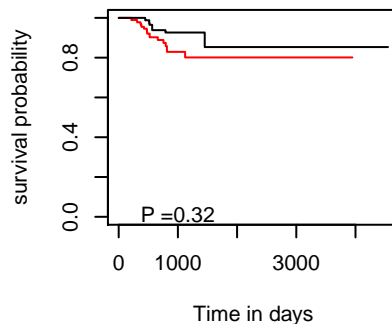

**DSS hsa-mir-1307**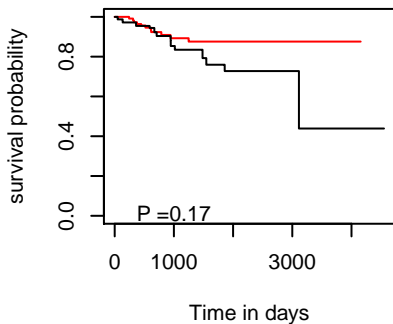**OS hsa-mir-146b**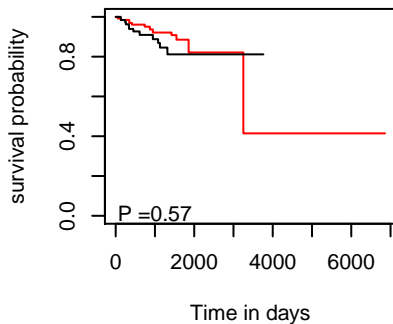**PFI hsa-mir-146b**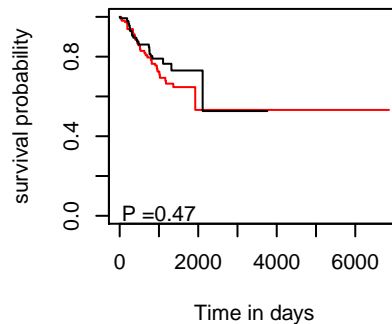**DFI hsa-mir-146b**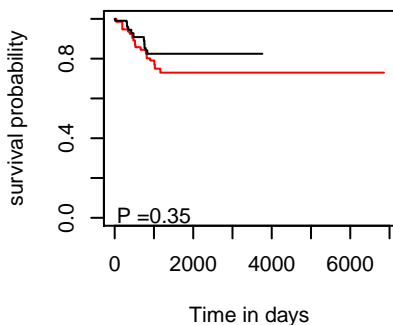**DSS hsa-mir-146b**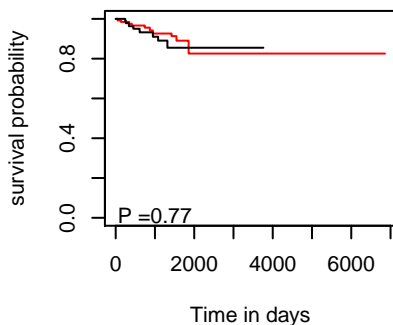**OS hsa-mir-3136**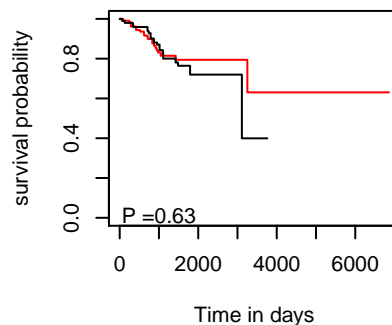**PFI hsa-mir-3136**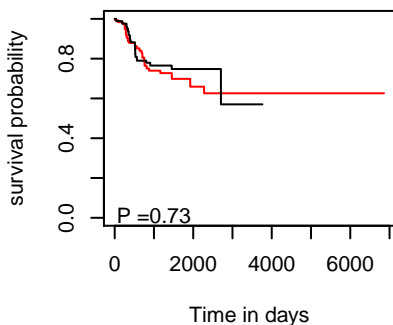**DFI hsa-mir-3136**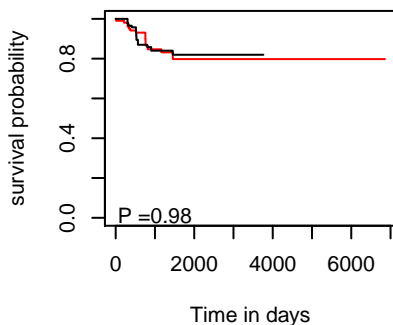**DSS hsa-mir-3136**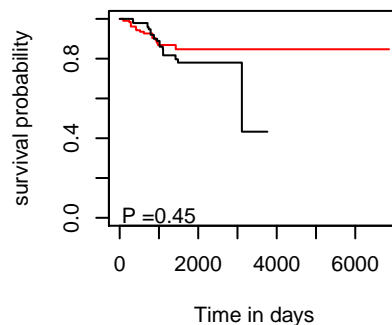

**OS hsa-mir-4469**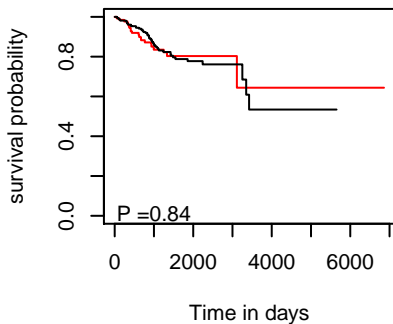**PFI hsa-mir-4469**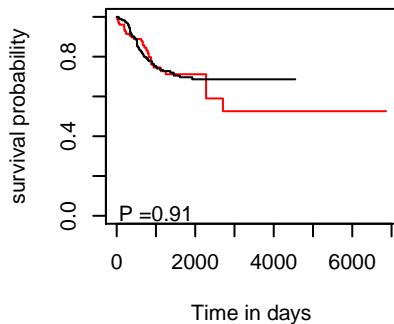**DFI hsa-mir-4469**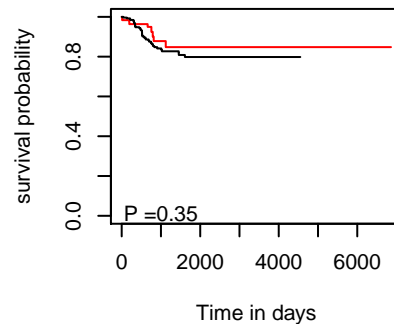**DSS hsa-mir-4469**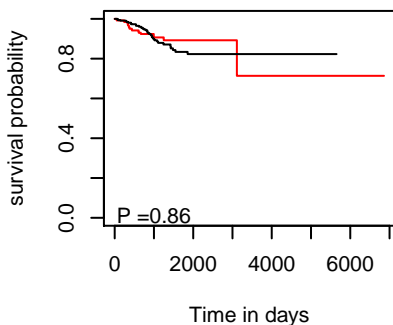**OS hsa-mir-582**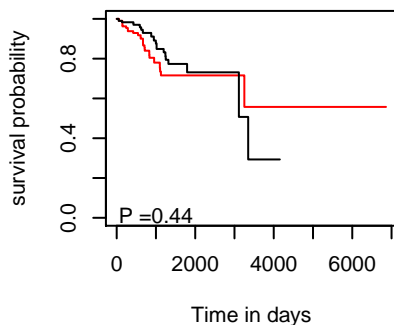**PFI hsa-mir-582**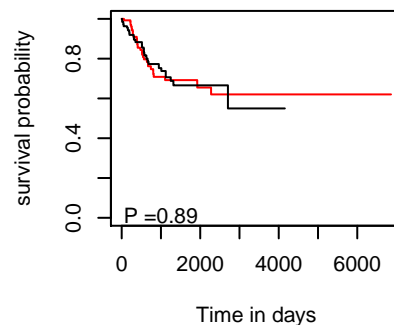**DFI hsa-mir-582**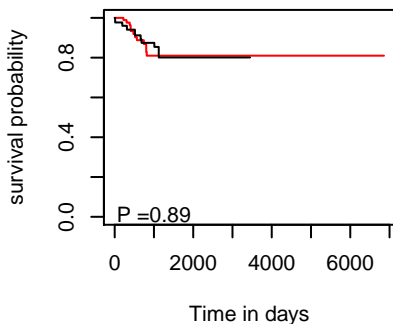**DSS hsa-mir-582**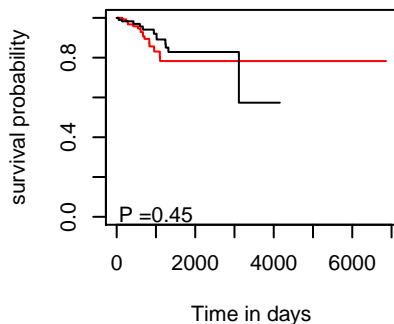**OS hsa-mir-548t**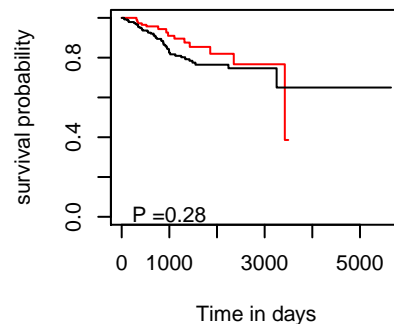

**PFI hsa-mir-548t**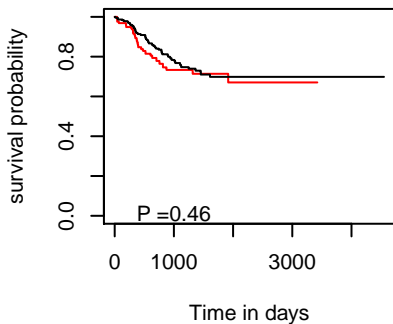**DFI hsa-mir-548t**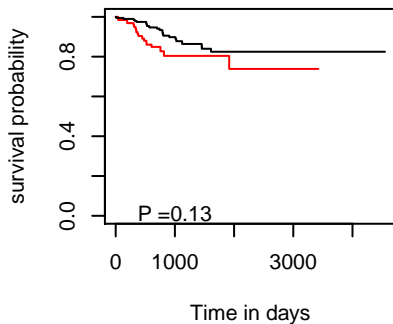**DSS hsa-mir-548t**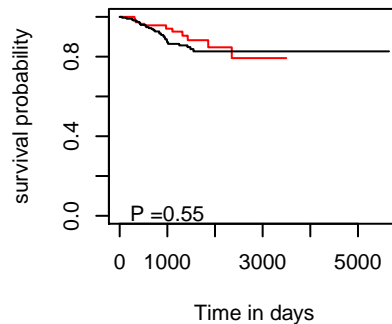**OS hsa-mir-6874**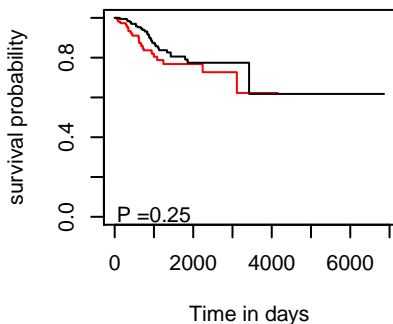**PFI hsa-mir-6874**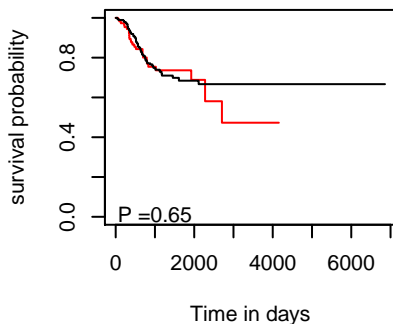**DFI hsa-mir-6874**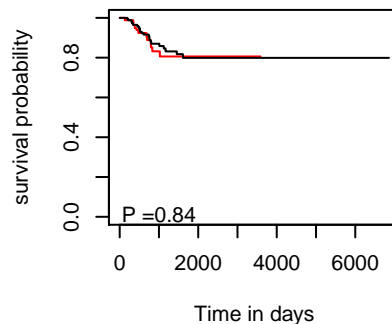**DSS hsa-mir-6874**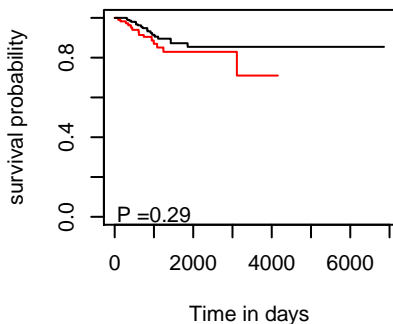**OS hsa-mir-6781**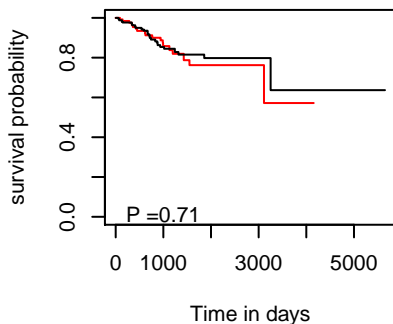**PFI hsa-mir-6781**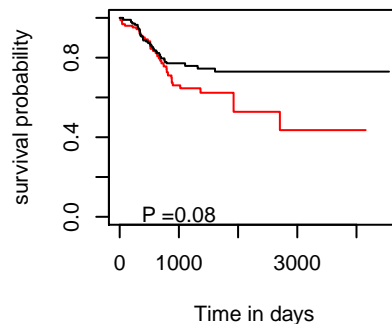

**DFI hsa-mir-6781**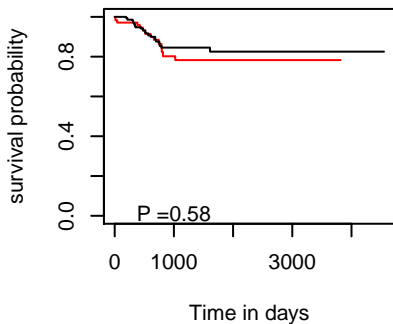**DSS hsa-mir-6781**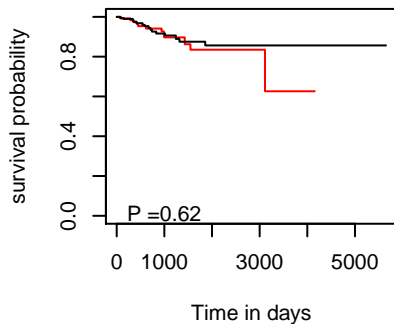**OS hsa-mir-346**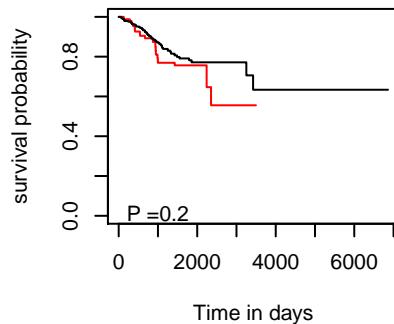**PFI hsa-mir-346**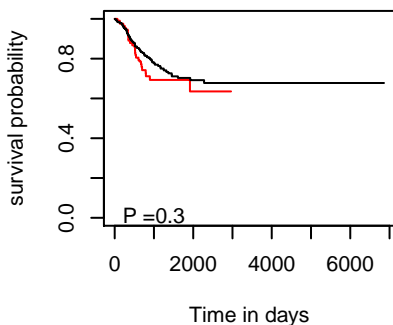**DFI hsa-mir-346**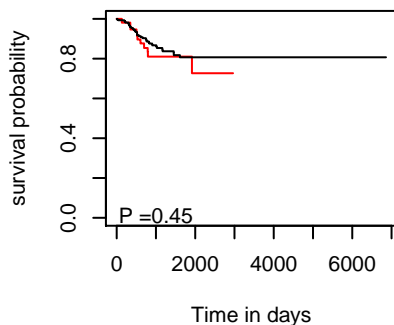**DSS hsa-mir-346**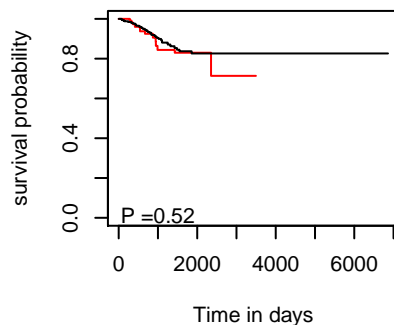**OS hsa-mir-4733**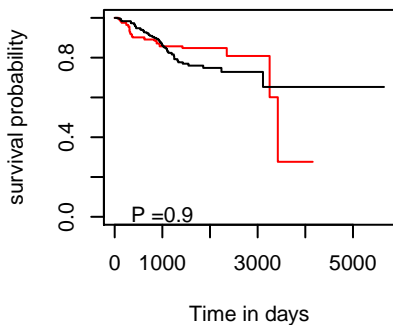**PFI hsa-mir-4733**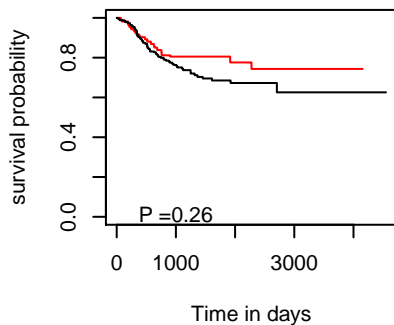**DFI hsa-mir-4733**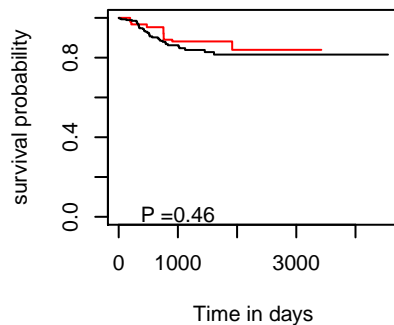

**DSS hsa-mir-4733**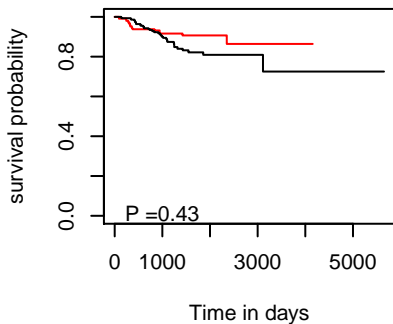**OS hsa-mir-632**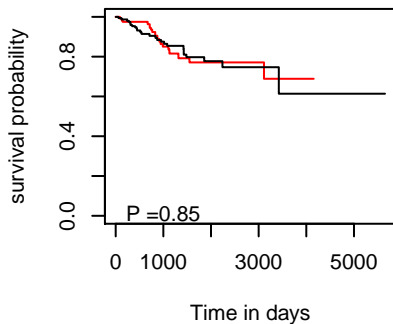**PFI hsa-mir-632**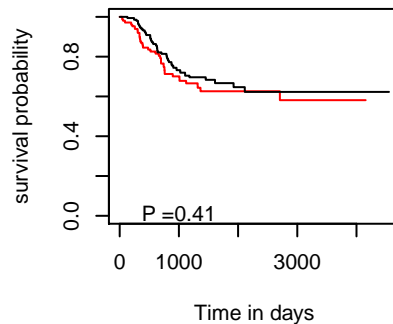**DFI hsa-mir-632**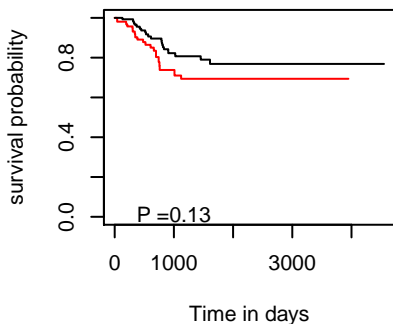**DSS hsa-mir-632**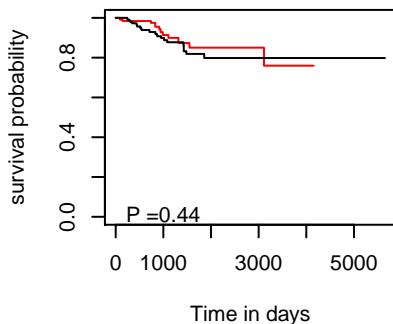**OS hsa-mir-6762**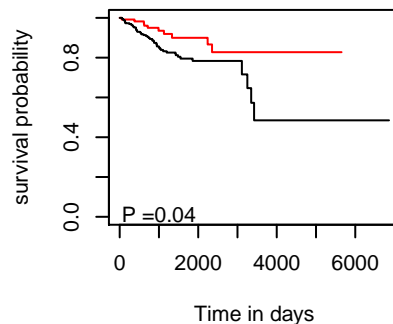**PFI hsa-mir-6762**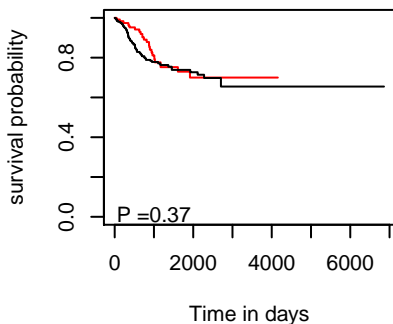**DFI hsa-mir-6762**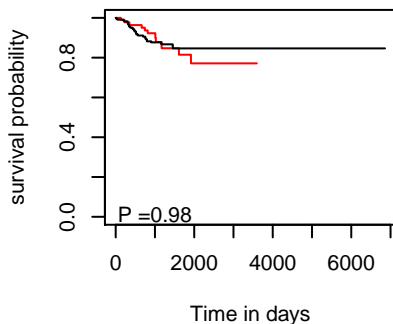**DSS hsa-mir-6762**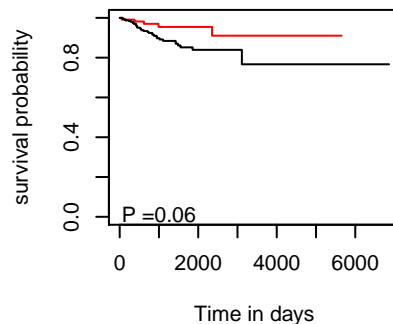

**OS hsa-mir-6763**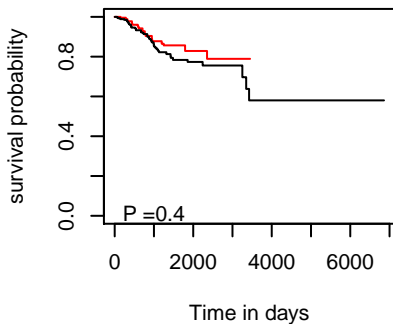**PFI hsa-mir-6763**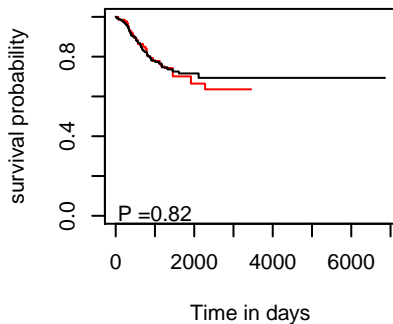**DFI hsa-mir-6763**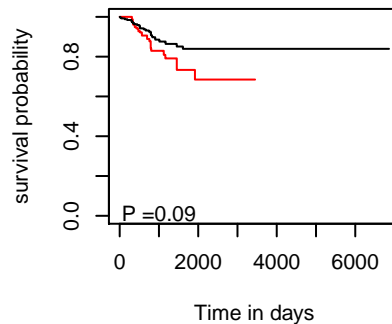**DSS hsa-mir-6763**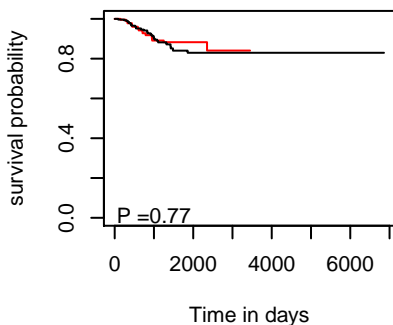**OS hsa-mir-1269b**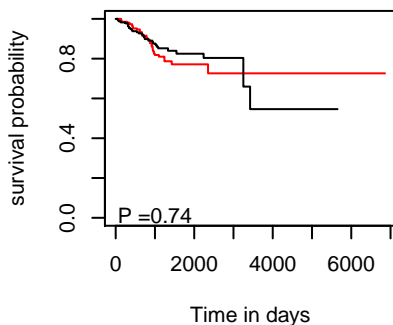**PFI hsa-mir-1269b**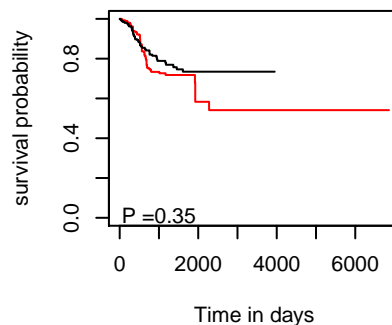**DFI hsa-mir-1269b**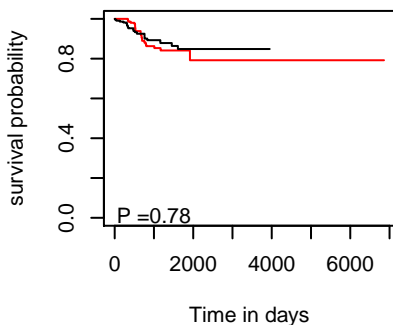**DSS hsa-mir-1269b**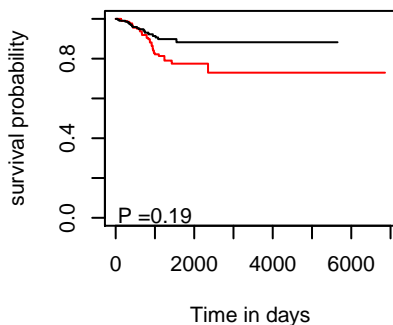**OS hsa-mir-6516**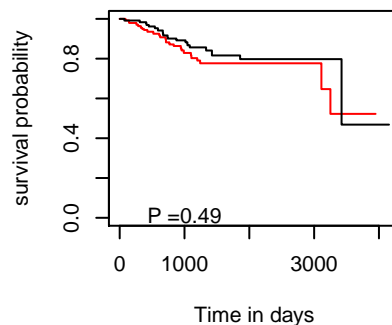

**PFI hsa-mir-6516**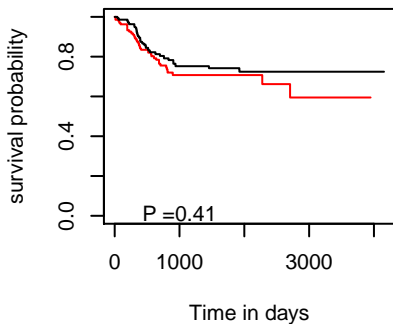**DFI hsa-mir-6516**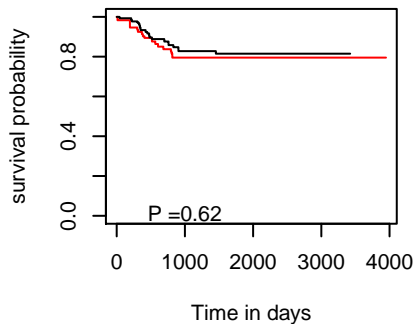**DSS hsa-mir-6516**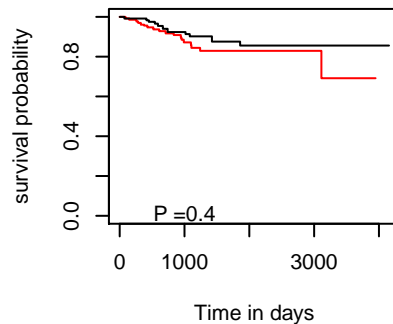**OS hsa-mir-552**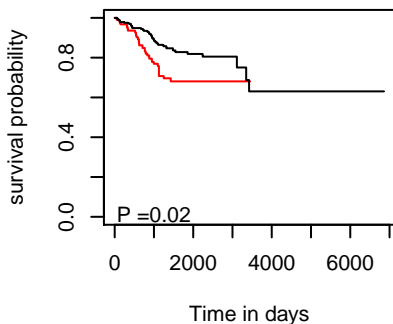**PFI hsa-mir-552**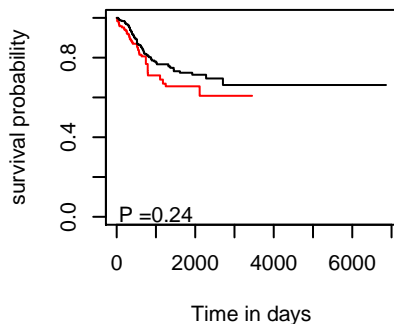**DFI hsa-mir-552**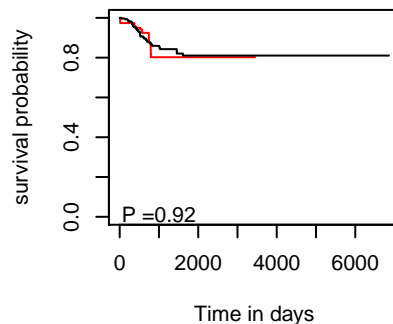**DSS hsa-mir-552**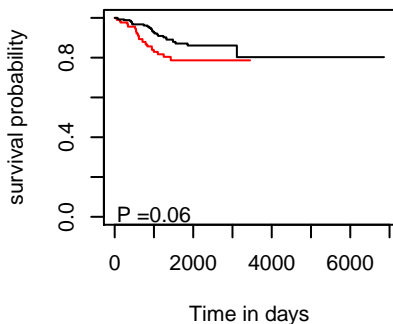**OS hsa-mir-3664**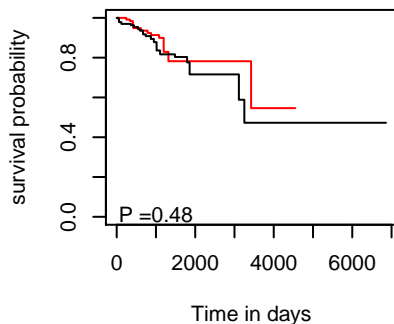**PFI hsa-mir-3664**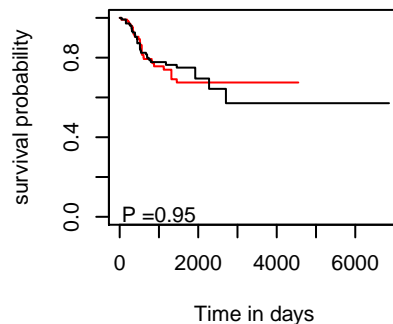

**DFI hsa-mir-3664**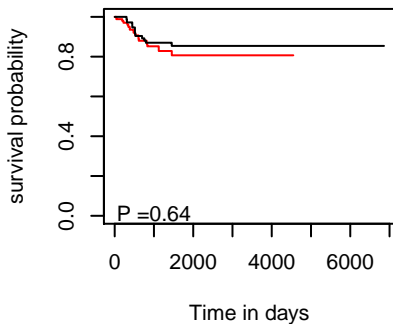**DSS hsa-mir-3664**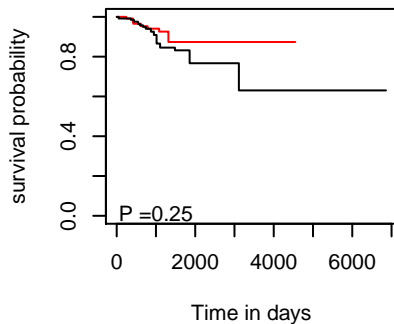**OS hsa-mir-486**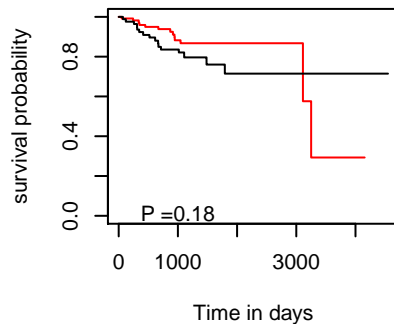**PFI hsa-mir-486**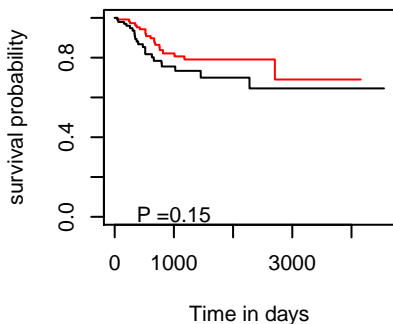**DFI hsa-mir-486**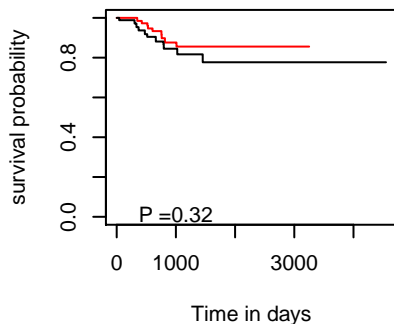**DSS hsa-mir-486**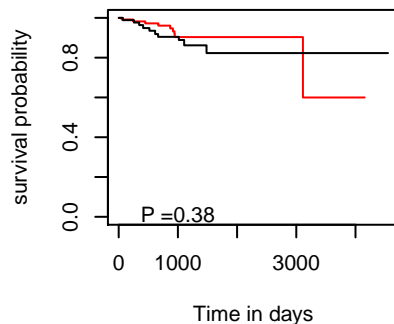**OS hsa-mir-6793**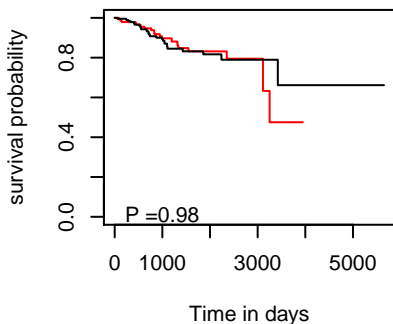**PFI hsa-mir-6793**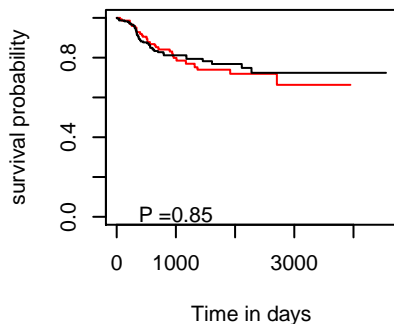**DFI hsa-mir-6793**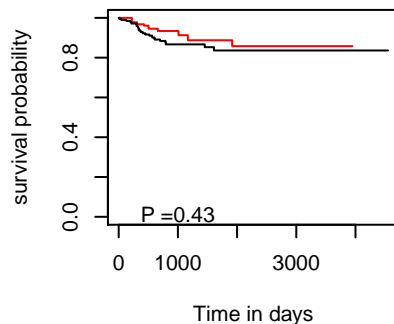

**DSS hsa-mir-6793**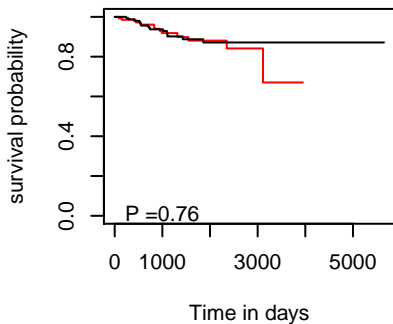**OS hsa-mir-6810**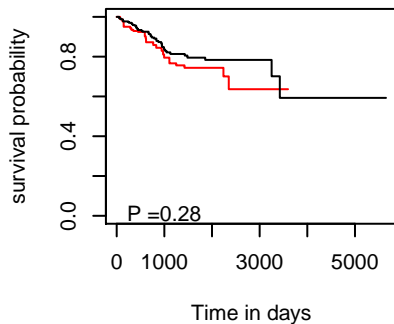**PFI hsa-mir-6810**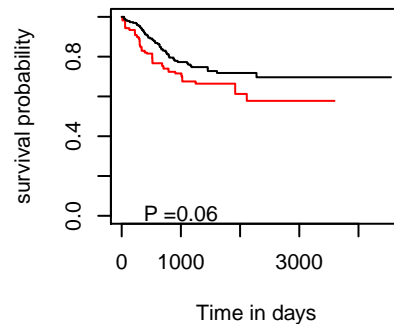**DFI hsa-mir-6810**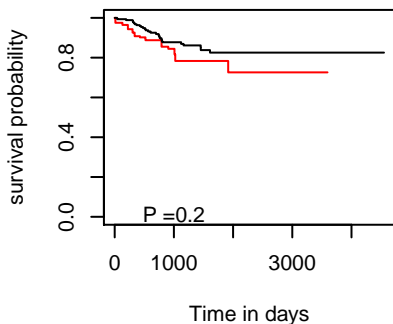**DSS hsa-mir-6810**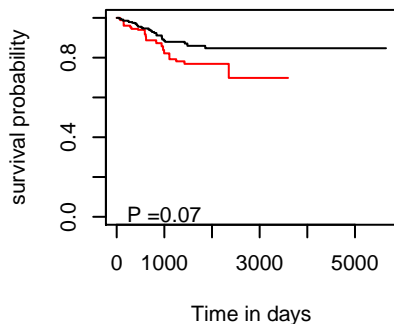**OS hsa-mir-3131**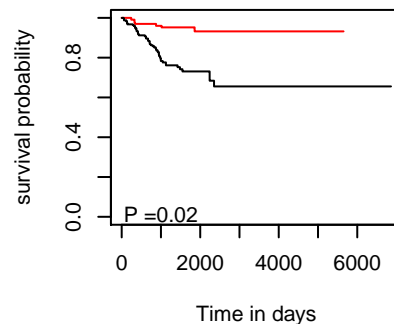**PFI hsa-mir-3131**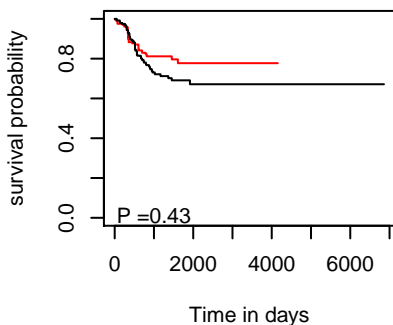**DFI hsa-mir-3131**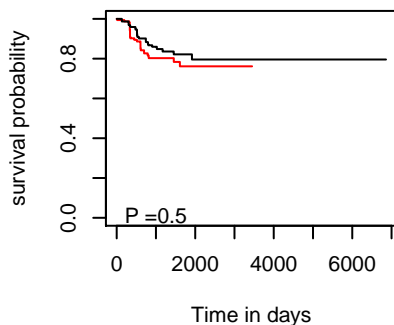**DSS hsa-mir-3131**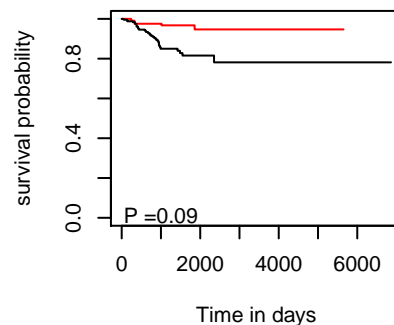

**OS hsa-mir-4787**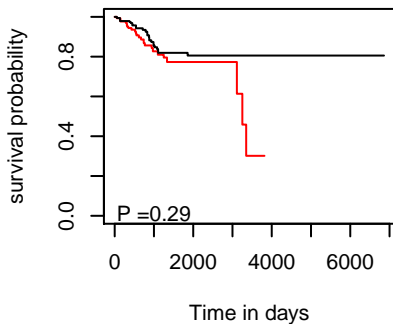**PFI hsa-mir-4787**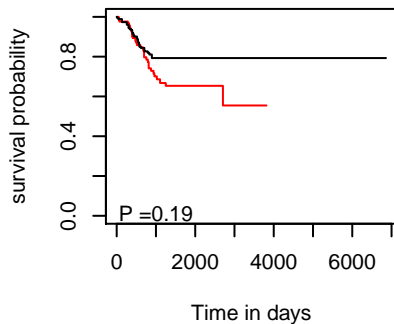**DFI hsa-mir-4787**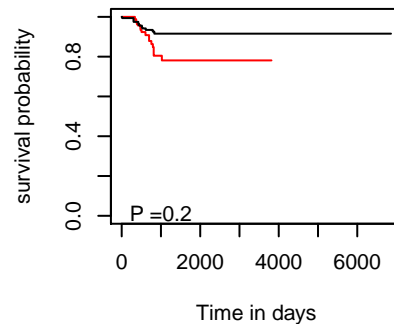**DSS hsa-mir-4787**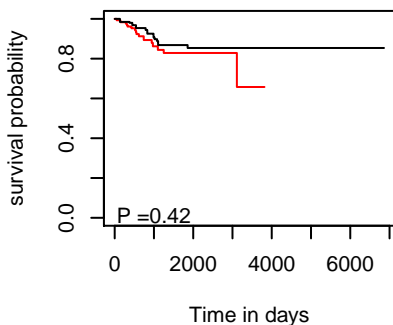**OS hsa-mir-5193**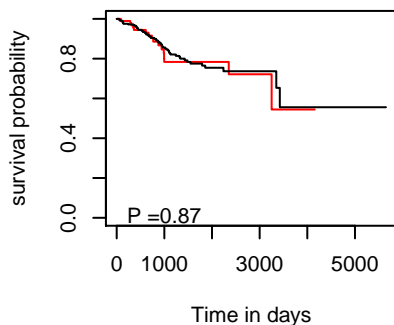**PFI hsa-mir-5193**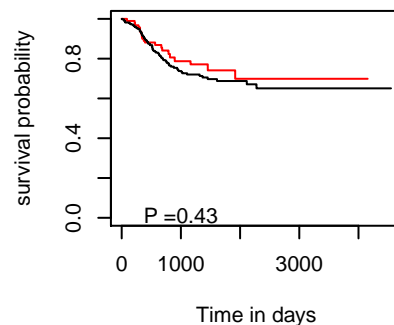**DFI hsa-mir-5193**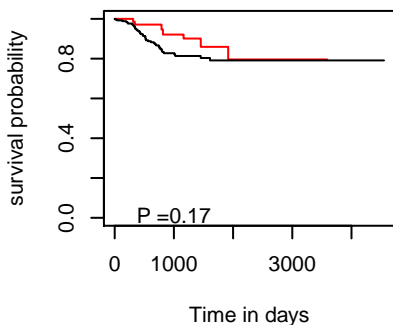**DSS hsa-mir-5193**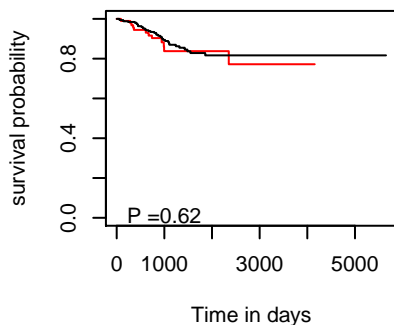**OS hsa-mir-3158-1**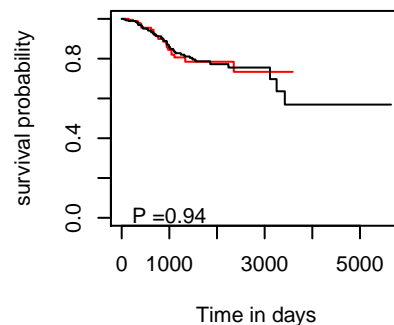

**PFI hsa-mir-3158-1**

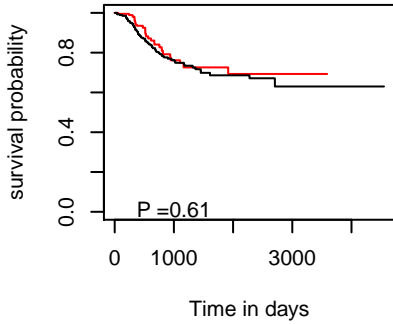

**DFI hsa-mir-3158-1**

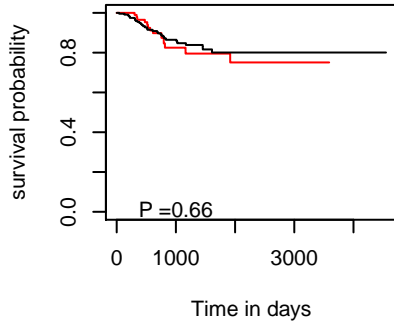

**DSS hsa-mir-3158-1**

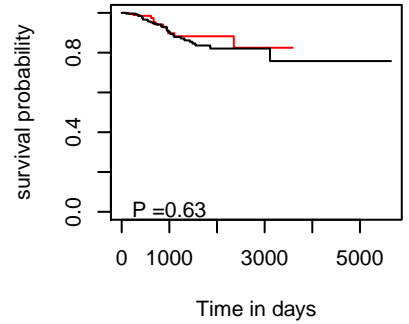

**OS hsa-mir-6507**

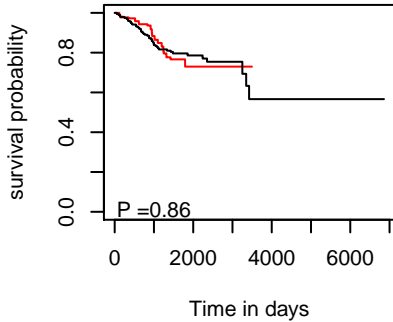

**PFI hsa-mir-6507**

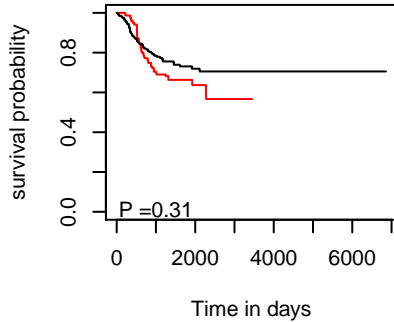

**DFI hsa-mir-6507**

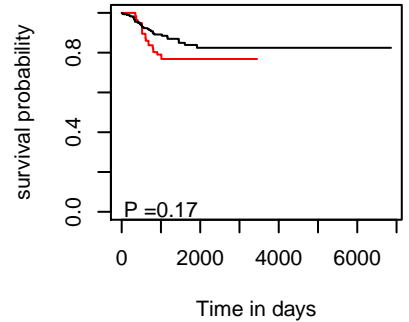

**DSS hsa-mir-6507**

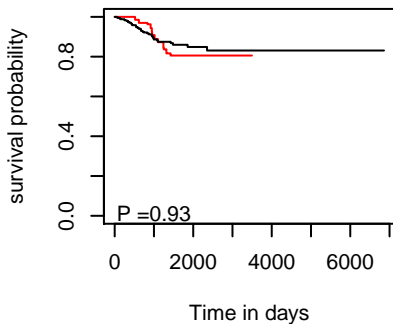

**OS hsa-mir-3157**

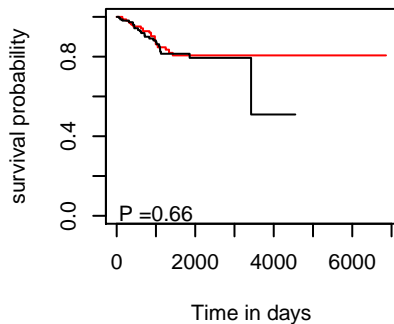

**PFI hsa-mir-3157**

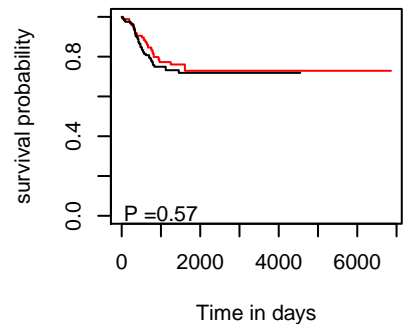

**DFI hsa-mir-3157**

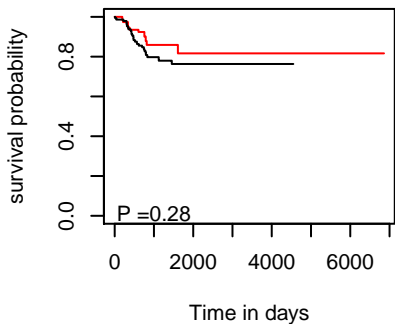

**DSS hsa-mir-3157**

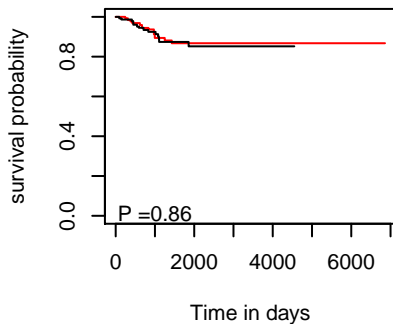

**OS hsa-mir-4685**

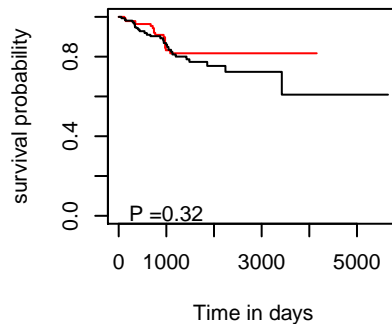

**PFI hsa-mir-4685**

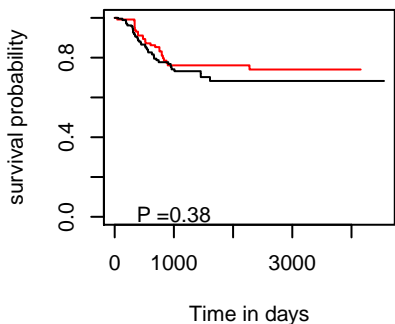

**DFI hsa-mir-4685**

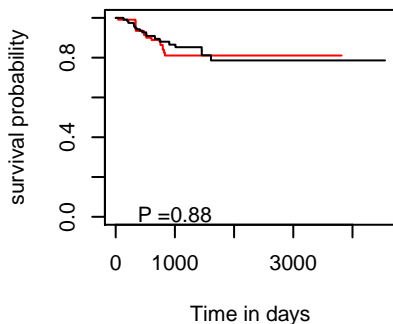

**DSS hsa-mir-4685**

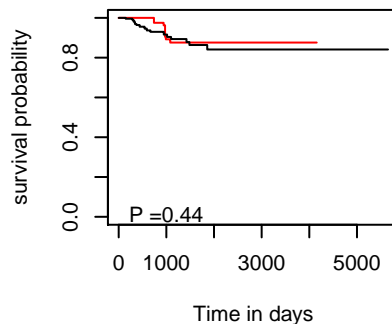

**OS hsa-mir-744**

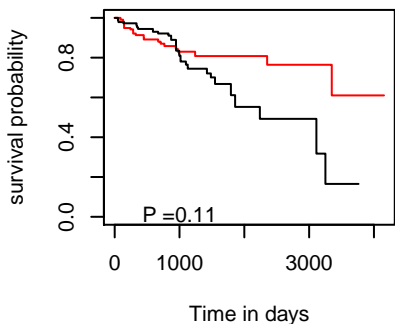

**PFI hsa-mir-744**

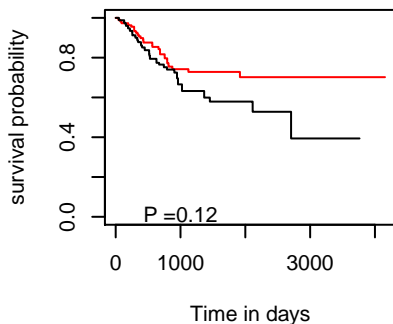

**DFI hsa-mir-744**

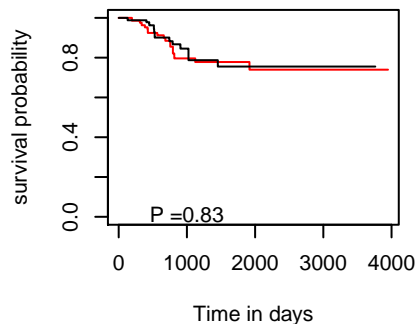

**DSS hsa-mir-744**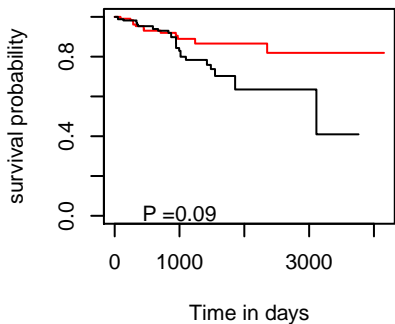**OS hsa-mir-3667**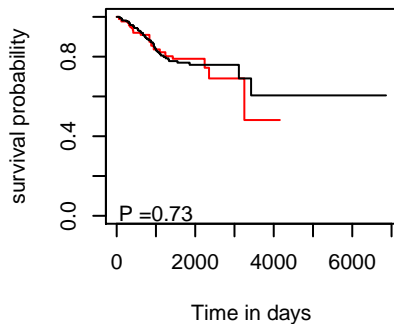**PFI hsa-mir-3667**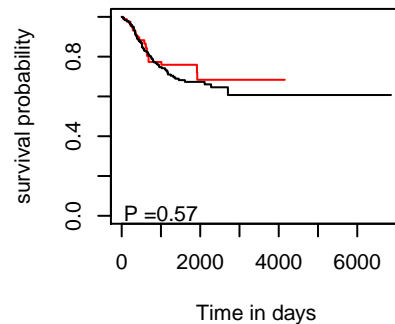**DFI hsa-mir-3667**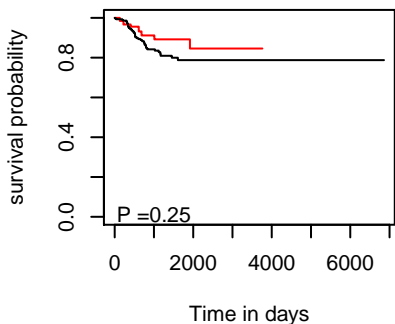**DSS hsa-mir-3667**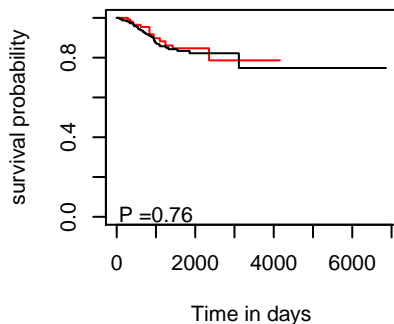**OS hsa-mir-570**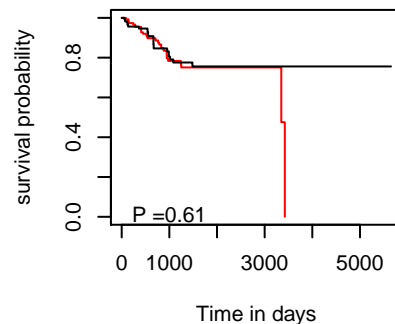**PFI hsa-mir-570**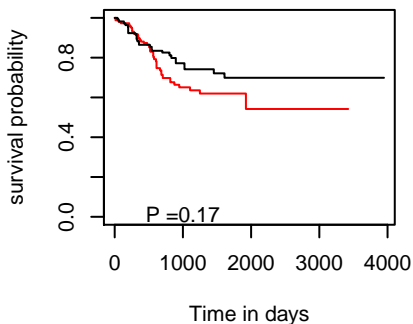**DFI hsa-mir-570**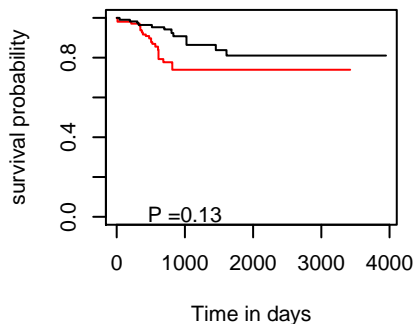**DSS hsa-mir-570**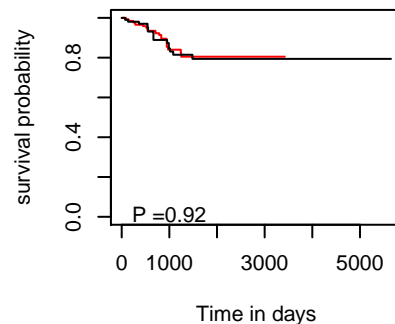

**OS hsa-mir-639**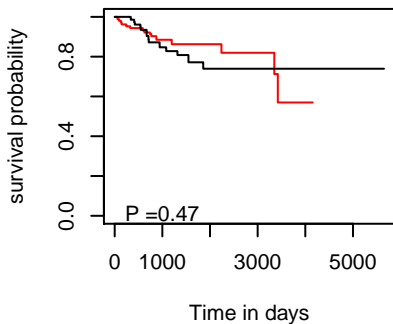**PFI hsa-mir-639**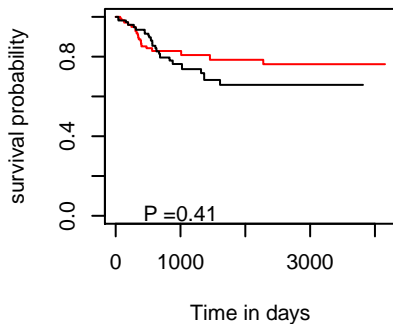**DFI hsa-mir-639**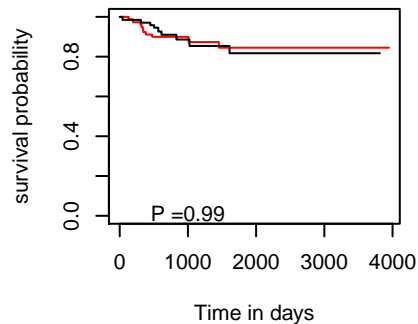**DSS hsa-mir-639**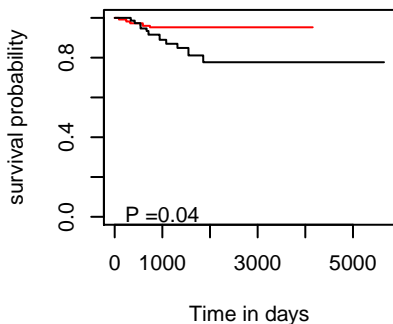**OS hsa-mir-30e**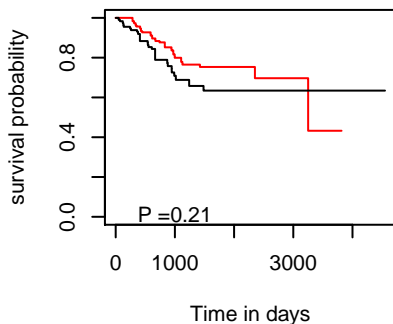**PFI hsa-mir-30e**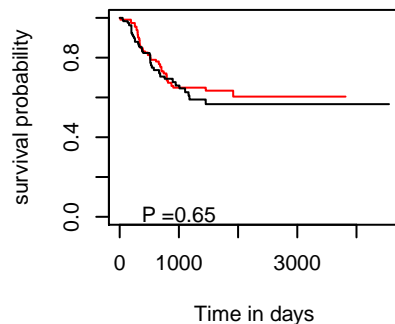**DFI hsa-mir-30e**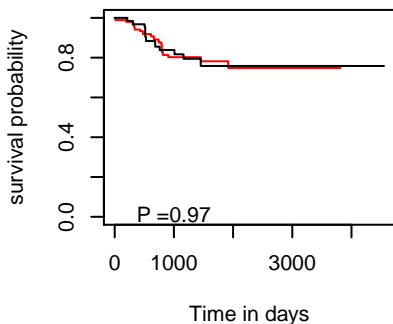**DSS hsa-mir-30e**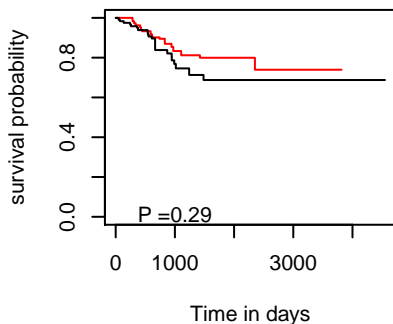**OS hsa-mir-4444-2**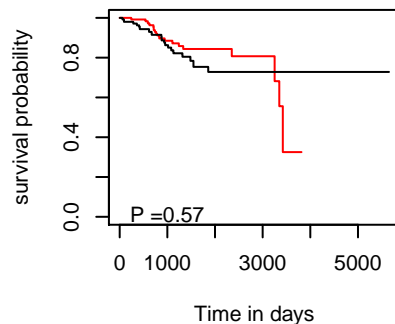

**PFI hsa-mir-4444-2**

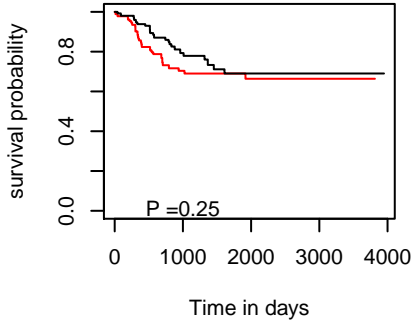

**DFI hsa-mir-4444-2**

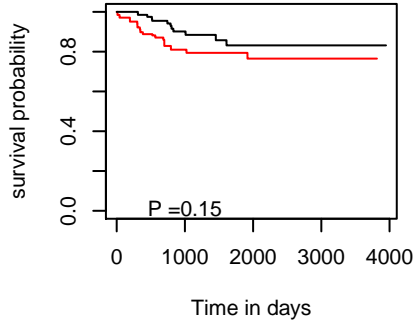

**DSS hsa-mir-4444-2**

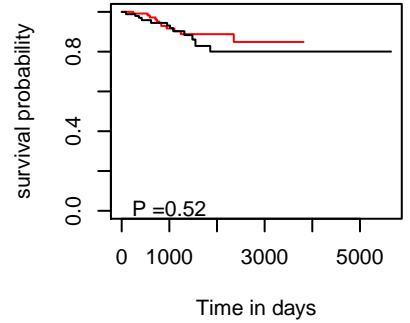

**OS hsa-mir-375**

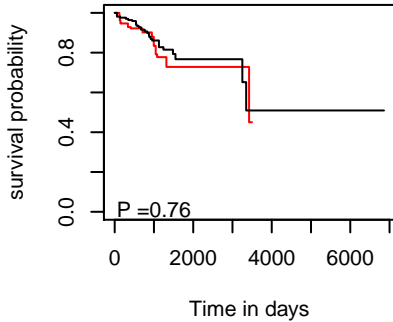

**PFI hsa-mir-375**

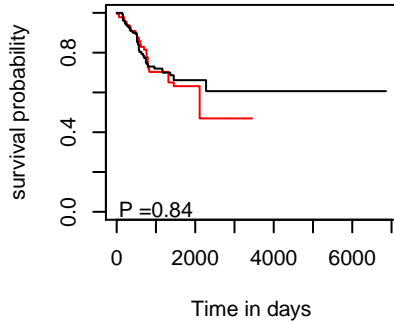

**DFI hsa-mir-375**

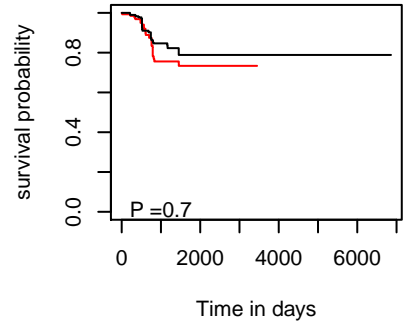

**DSS hsa-mir-375**

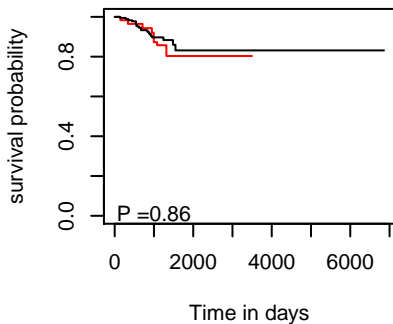

**OS hsa-mir-589**

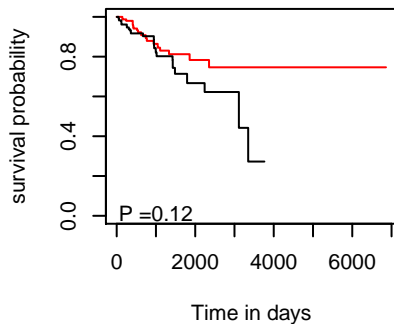

**PFI hsa-mir-589**

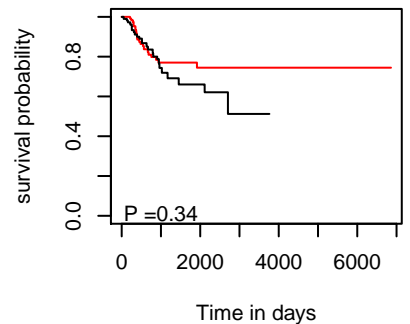

**DFI hsa-mir-589**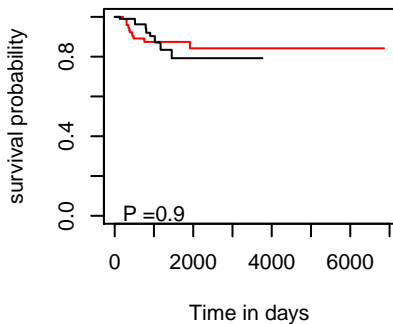**DSS hsa-mir-589**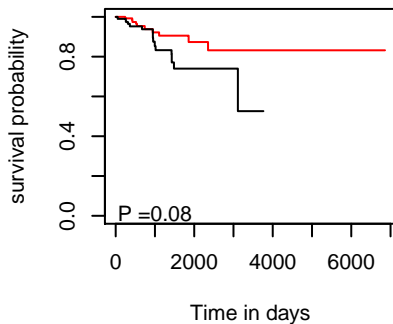**OS hsa-mir-1910**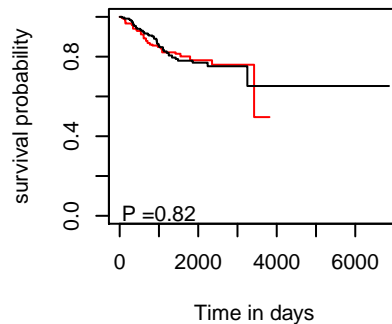**PFI hsa-mir-1910**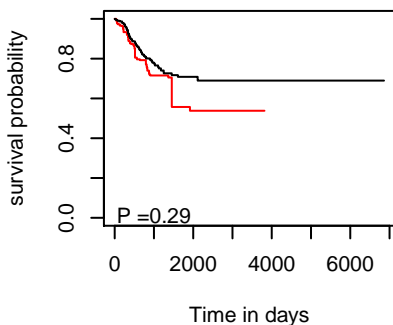**DFI hsa-mir-1910**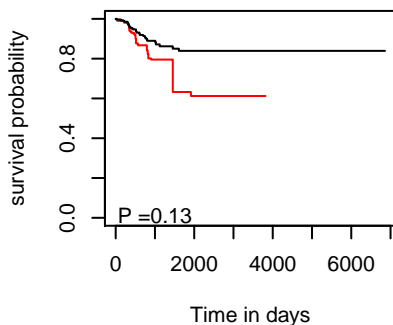**DSS hsa-mir-1910**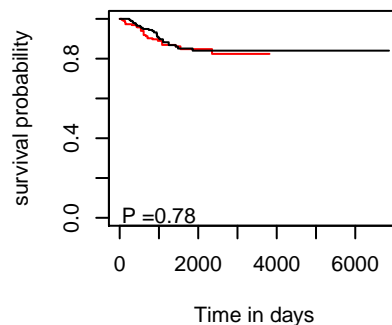**OS hsa-mir-3065**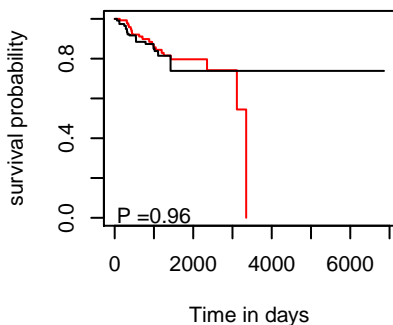**PFI hsa-mir-3065**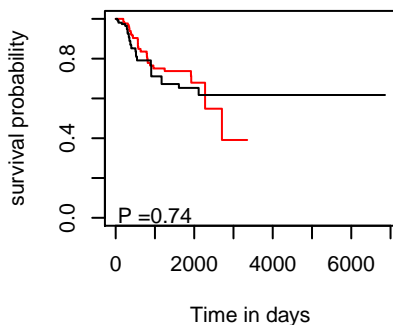**DFI hsa-mir-3065**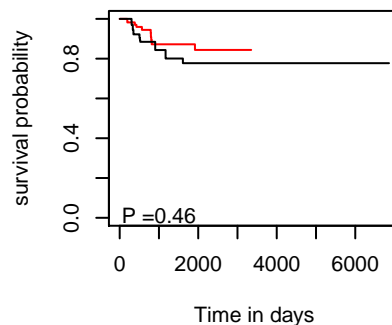

**DSS hsa-mir-3065**

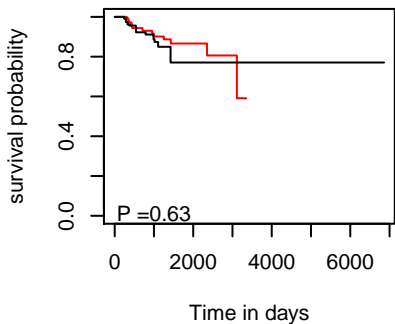

**OS hsa-mir-30c-1**

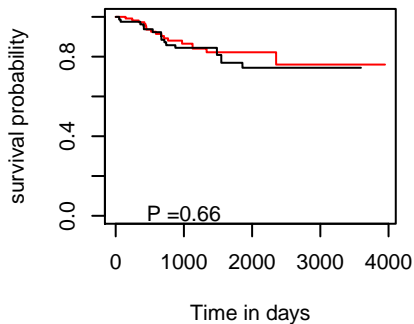

**PFI hsa-mir-30c-1**

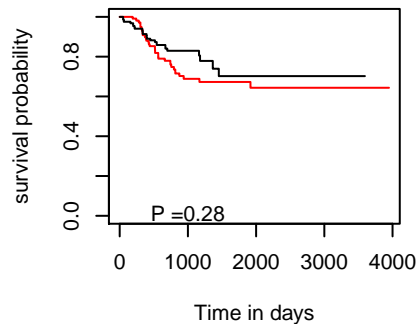

**DFI hsa-mir-30c-1**

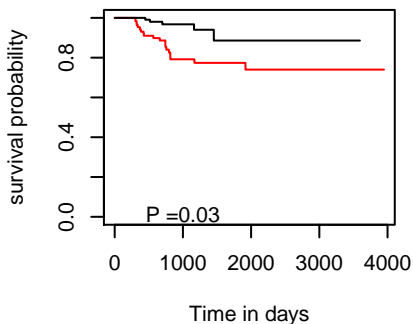

**DSS hsa-mir-30c-1**

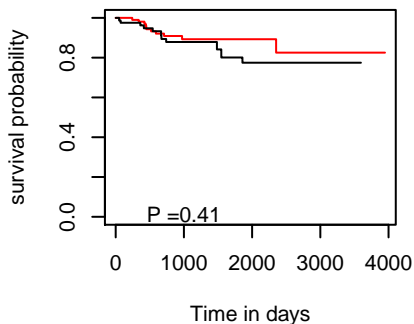

**OS hsa-mir-4659a**

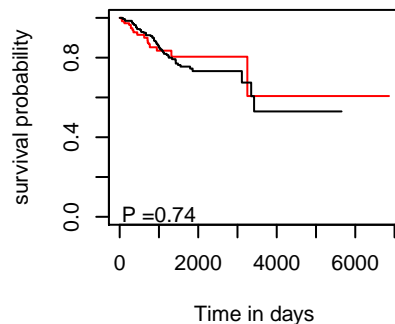

**PFI hsa-mir-4659a**

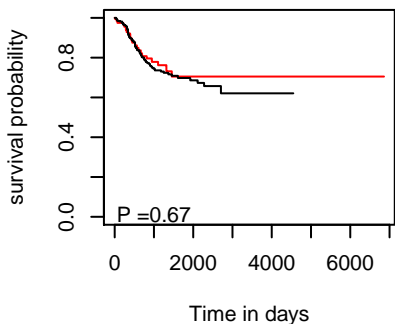

**DFI hsa-mir-4659a**

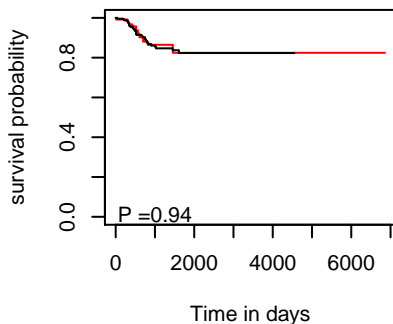

**DSS hsa-mir-4659a**

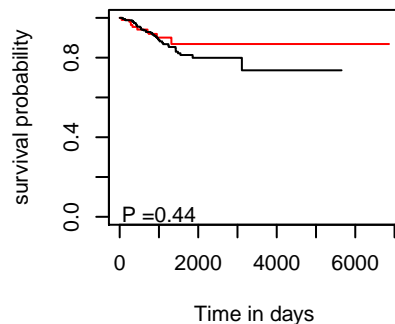

**OS hsa-mir-339**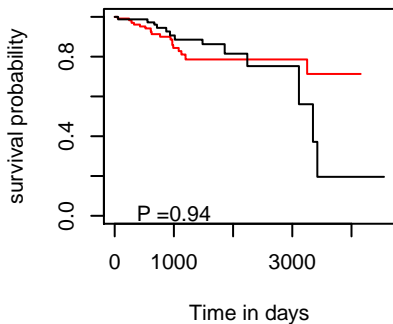**PFI hsa-mir-339**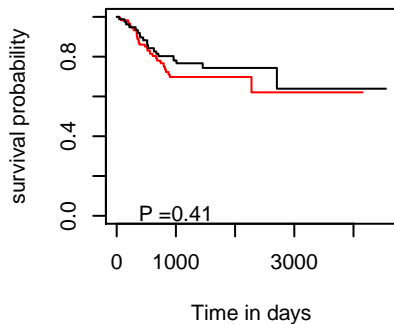**DFI hsa-mir-339**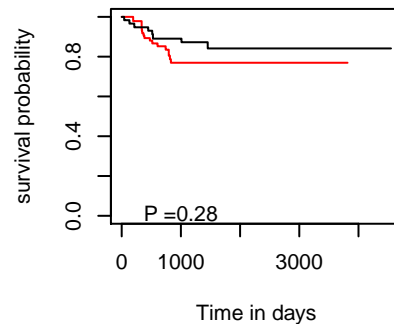**DSS hsa-mir-339**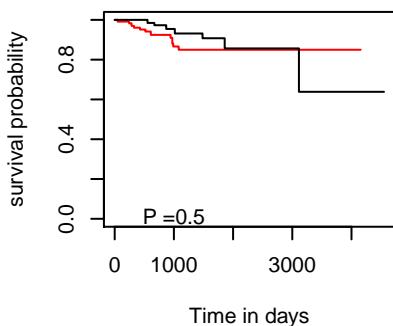**OS hsa-mir-1268b**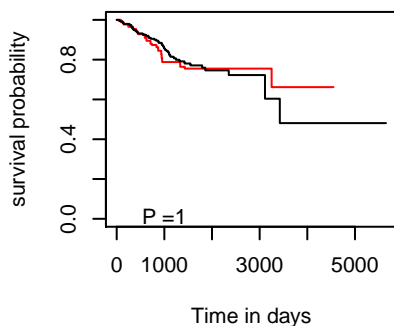**PFI hsa-mir-1268b**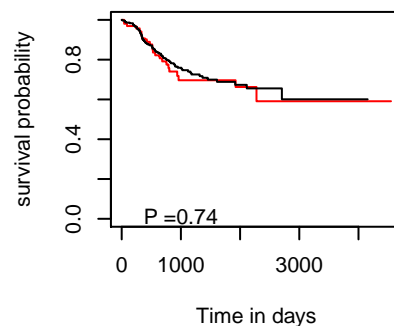**DFI hsa-mir-1268b**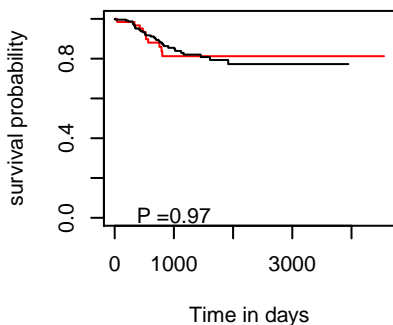**DSS hsa-mir-1268b**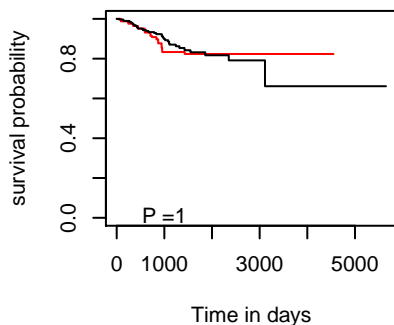**OS hsa-mir-6843**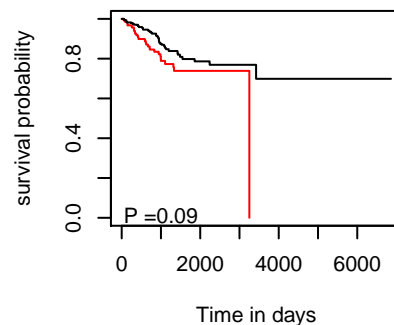

**PFI hsa-mir-6843**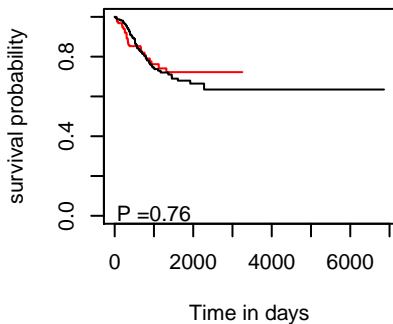**DFI hsa-mir-6843**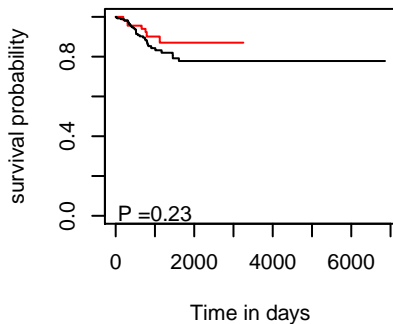**DSS hsa-mir-6843**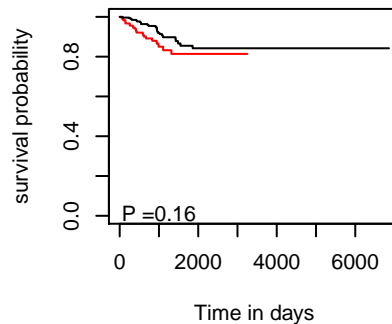**OS hsa-mir-4691**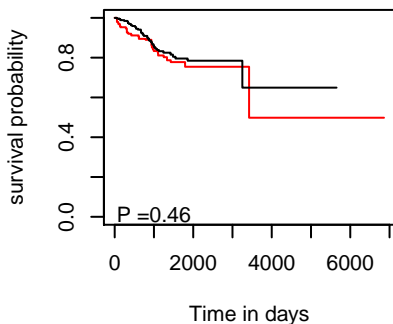**PFI hsa-mir-4691**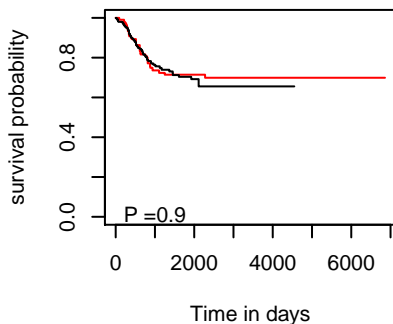**DFI hsa-mir-4691**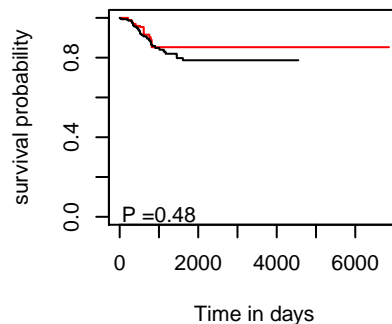**DSS hsa-mir-4691**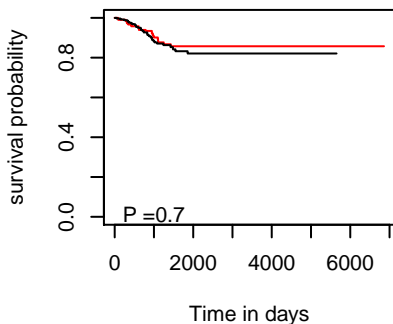**OS hsa-mir-4755**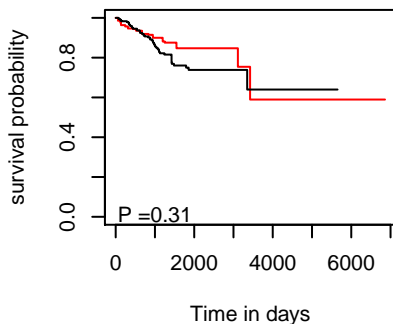**PFI hsa-mir-4755**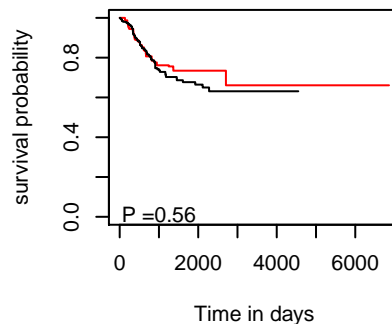

**DFI hsa-mir-4755**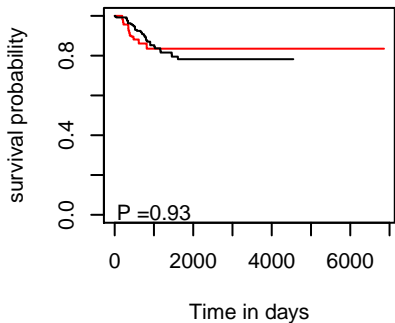**DSS hsa-mir-4755**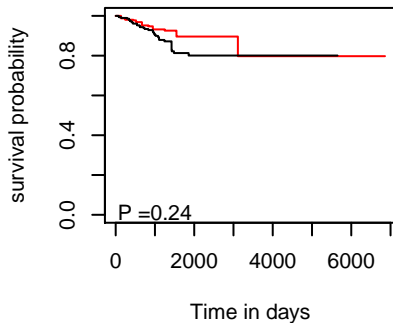**OS hsa-mir-135b**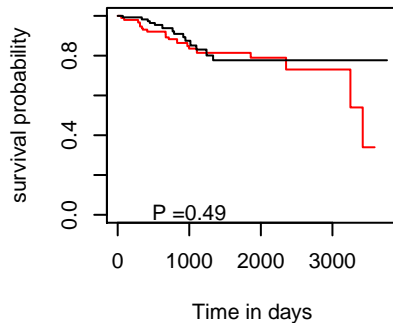**PFI hsa-mir-135b**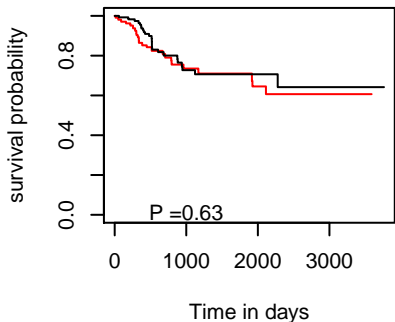**DFI hsa-mir-135b**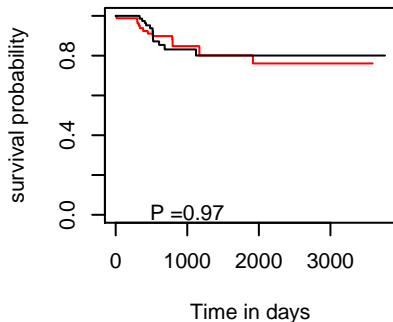**DSS hsa-mir-135b**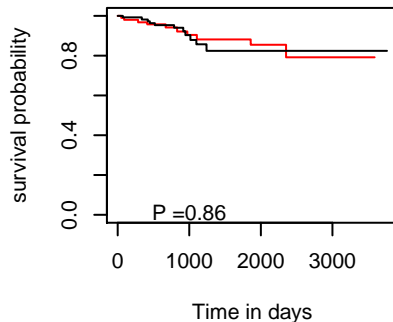**OS hsa-mir-3605**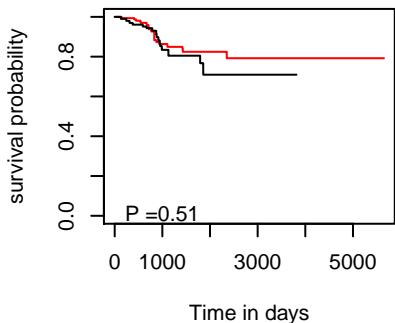**PFI hsa-mir-3605**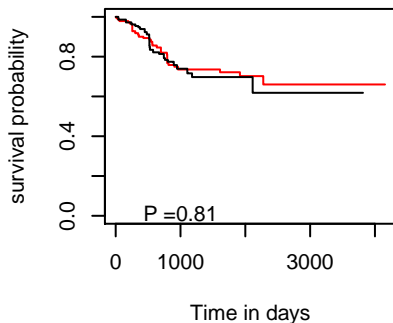**DFI hsa-mir-3605**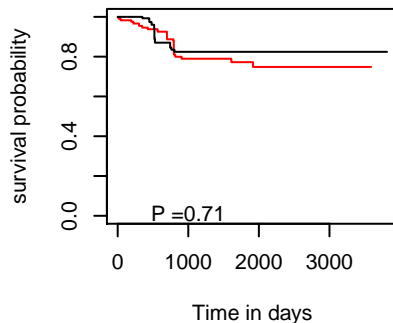



**OS hsa-mir-6885**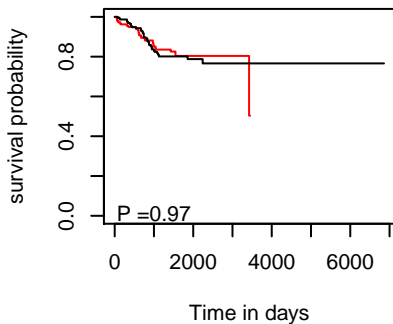**PFI hsa-mir-6885**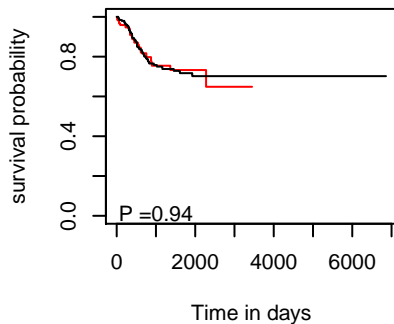**DFI hsa-mir-6885**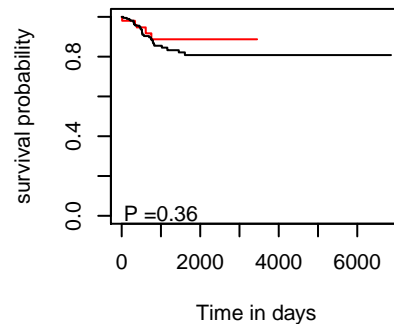**DSS hsa-mir-6885**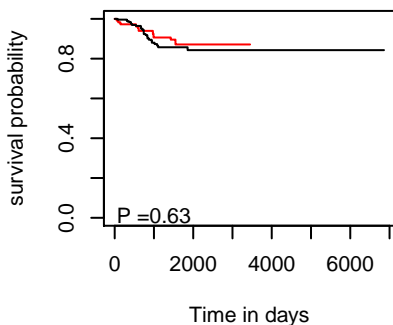**OS hsa-mir-4727**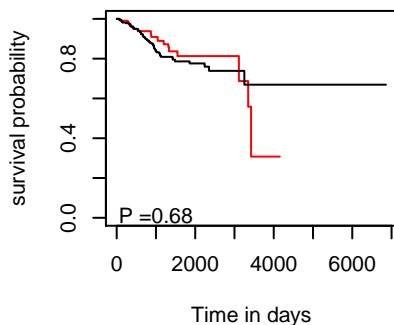**PFI hsa-mir-4727**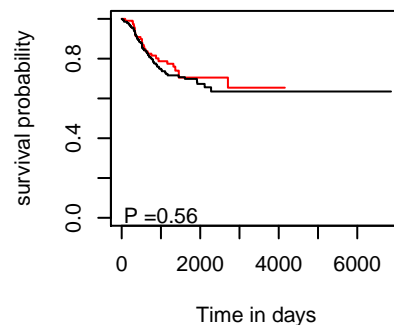**DFI hsa-mir-4727**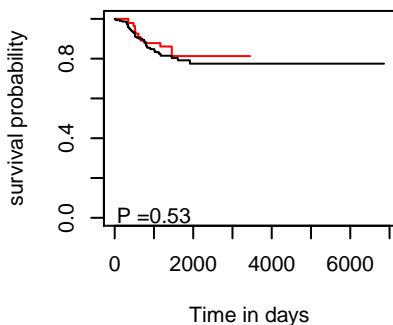**DSS hsa-mir-4727**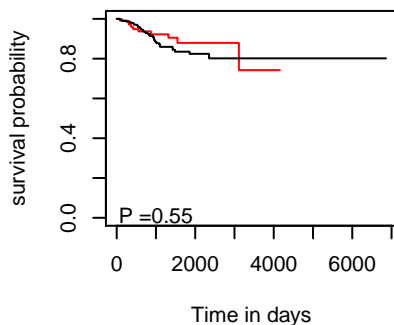**OS hsa-mir-3607**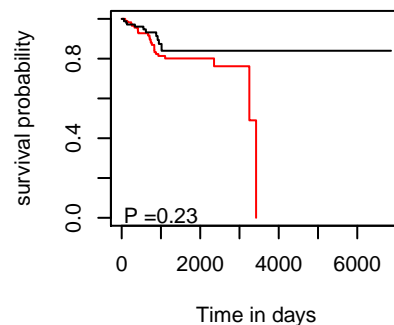

**PFI hsa-mir-3607**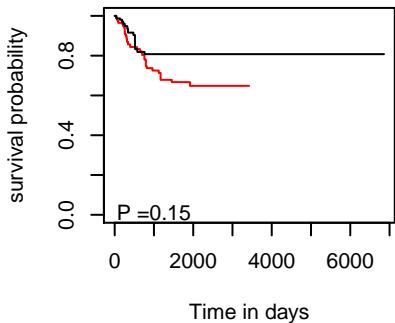**DFI hsa-mir-3607**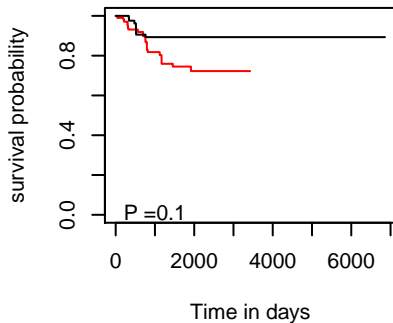**DSS hsa-mir-3607**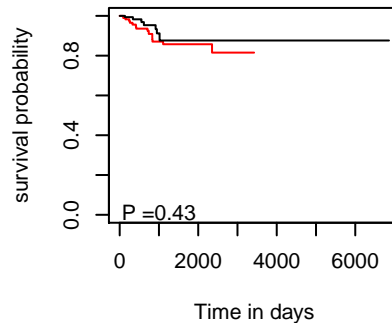**OS hsa-mir-3610**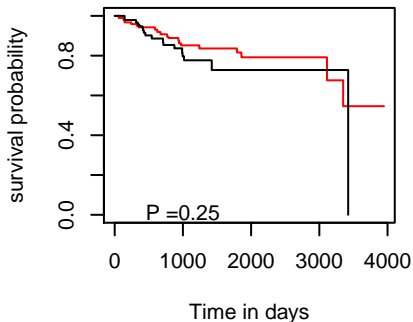**PFI hsa-mir-3610**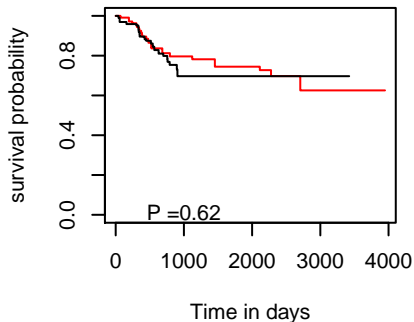**DFI hsa-mir-3610**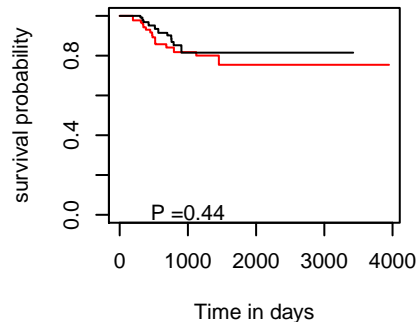**DSS hsa-mir-3610**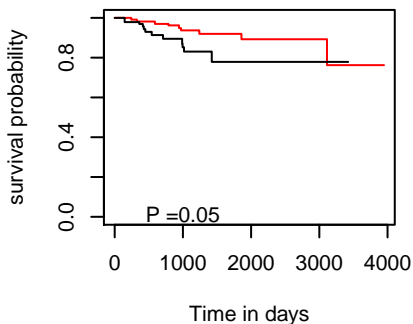**OS hsa-mir-548k**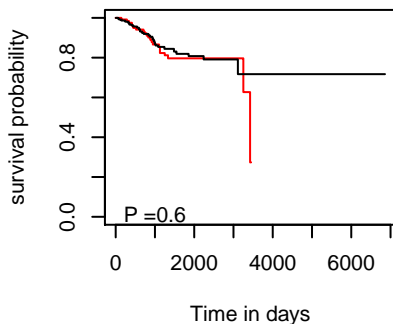**PFI hsa-mir-548k**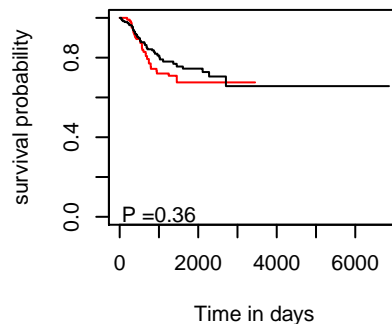

**DFI hsa-mir-548k**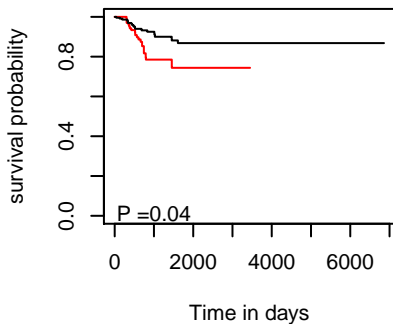**DSS hsa-mir-548k**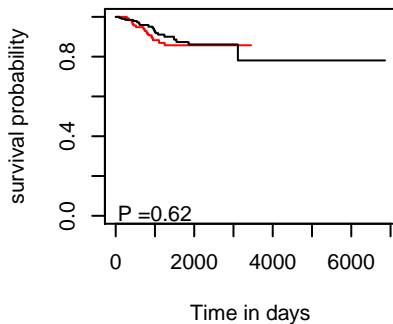**OS hsa-mir-378f**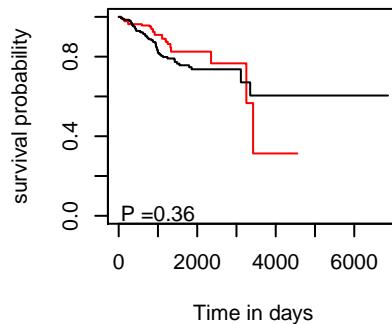**PFI hsa-mir-378f**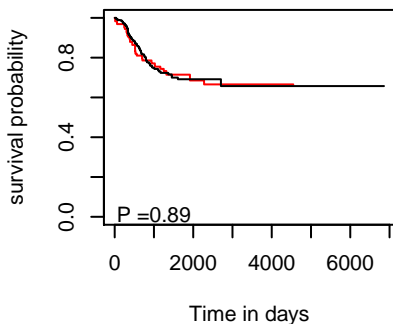**DFI hsa-mir-378f**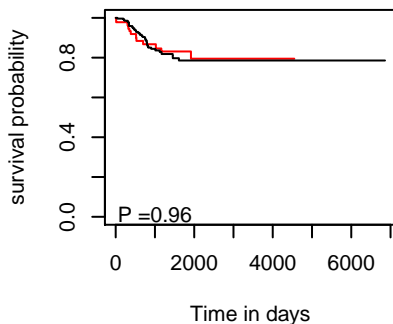**DSS hsa-mir-378f**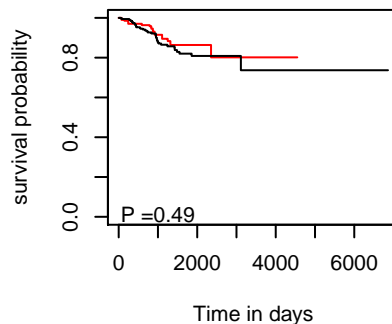**OS hsa-mir-135a-1**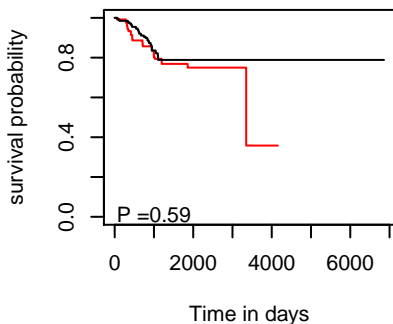**PFI hsa-mir-135a-1**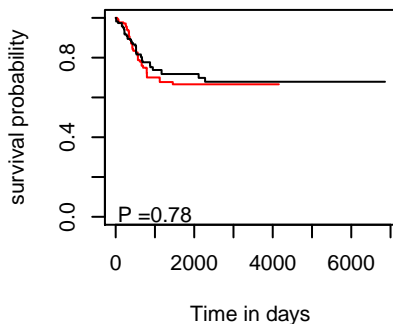**DFI hsa-mir-135a-1**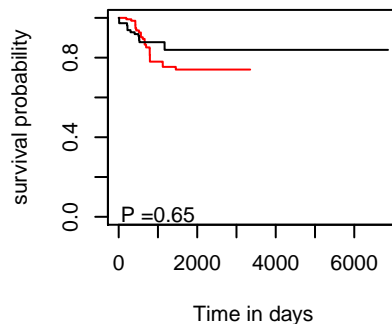

**DSS hsa-mir-135a-1**

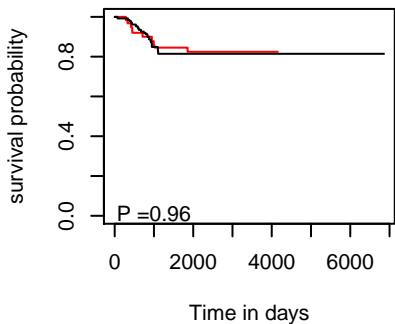

**OS hsa-mir-3158-2**

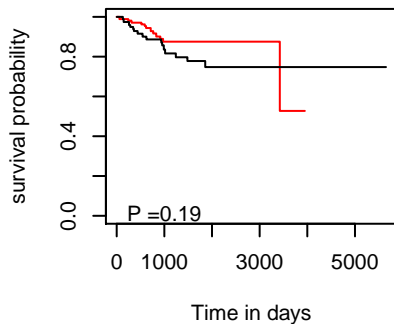

**PFI hsa-mir-3158-2**

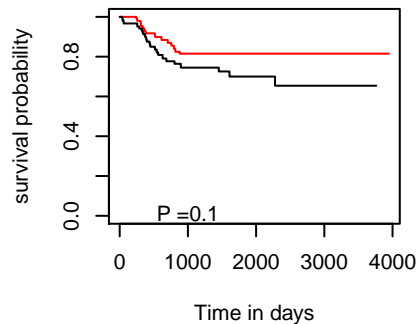

**DFI hsa-mir-3158-2**

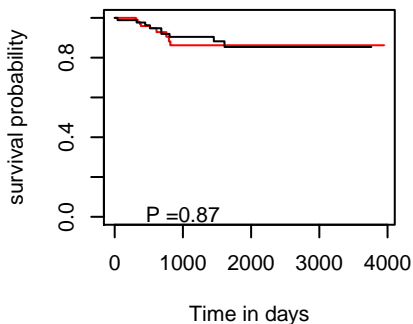

**DSS hsa-mir-3158-2**

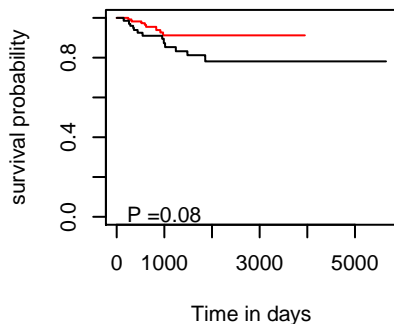

**OS hsa-mir-4777**

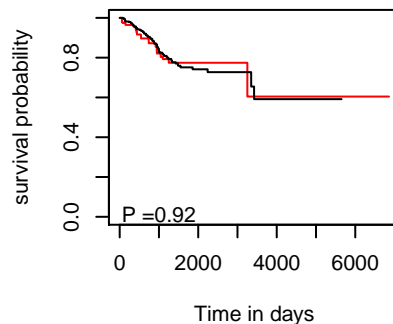

**PFI hsa-mir-4777**

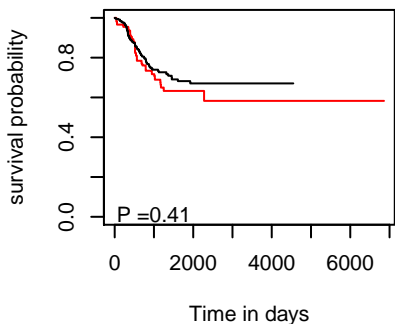

**DFI hsa-mir-4777**

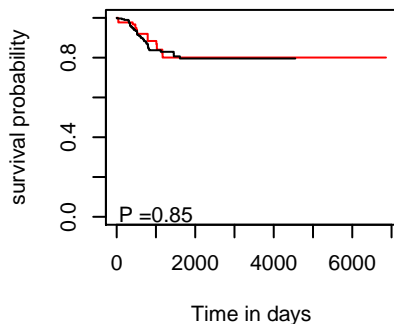

**DSS hsa-mir-4777**

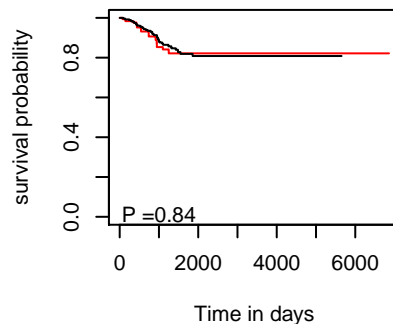

**OS hsa-mir-3188**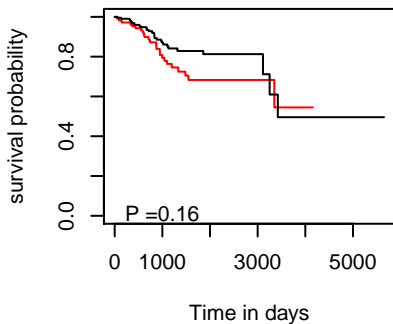**PFI hsa-mir-3188**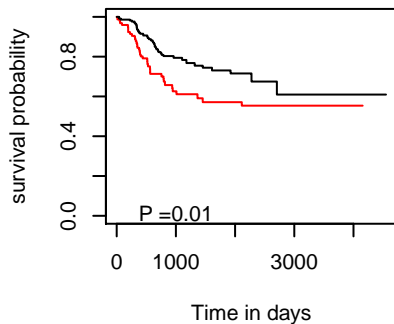**DFI hsa-mir-3188**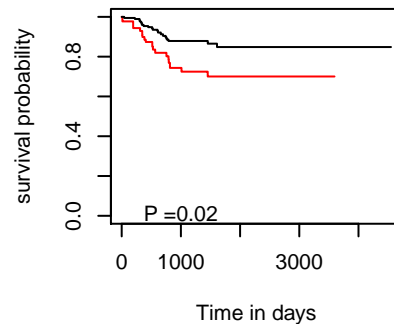**DSS hsa-mir-3188**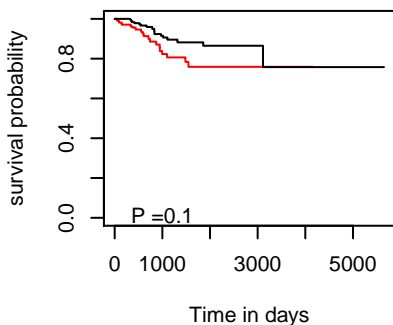**OS hsa-mir-6513**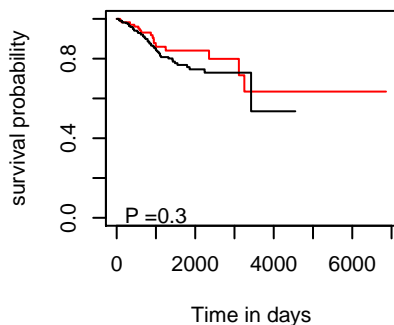**PFI hsa-mir-6513**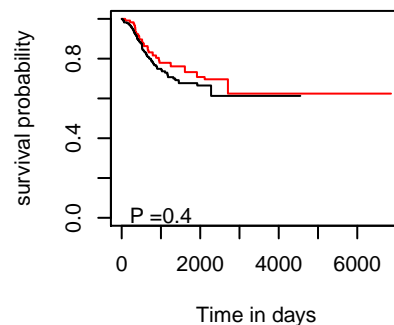**DFI hsa-mir-6513**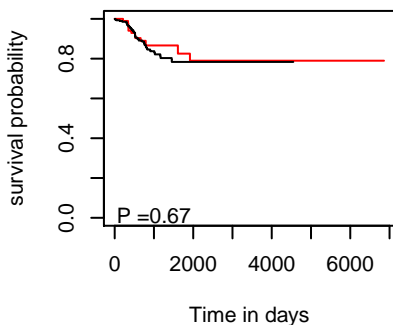**DSS hsa-mir-6513**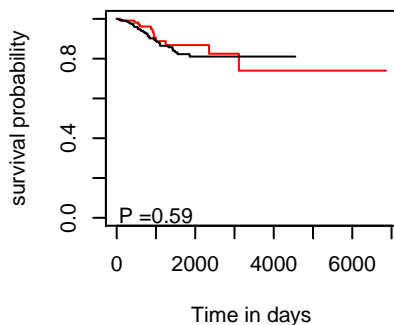**OS hsa-mir-132**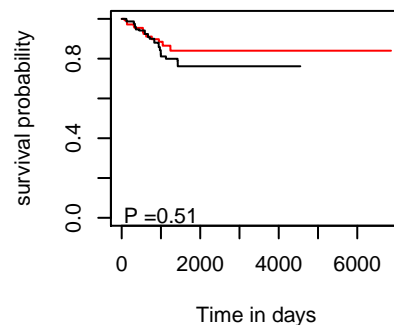



**DFI hsa-mir-211**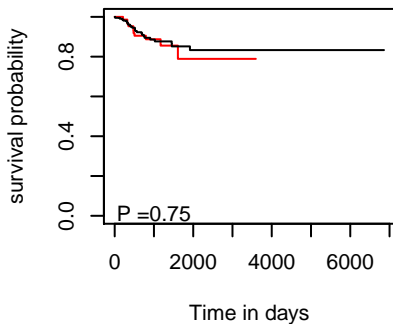**DSS hsa-mir-211**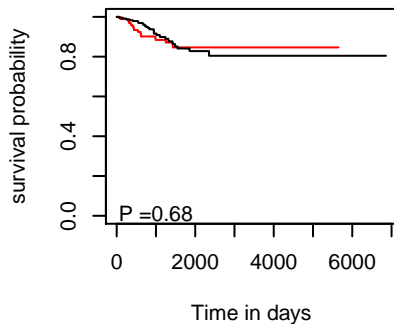**OS hsa-mir-6821**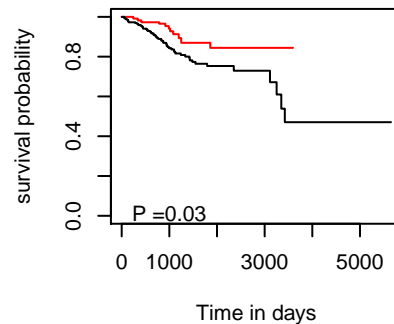**PFI hsa-mir-6821**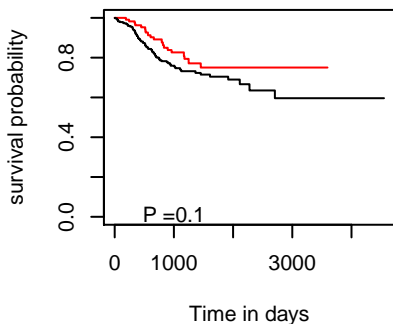**DFI hsa-mir-6821**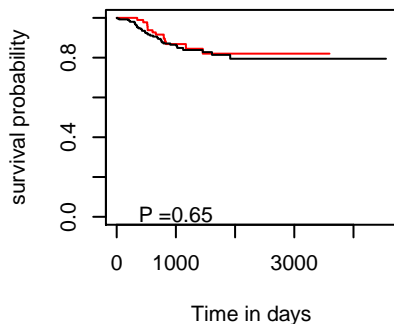**DSS hsa-mir-6821**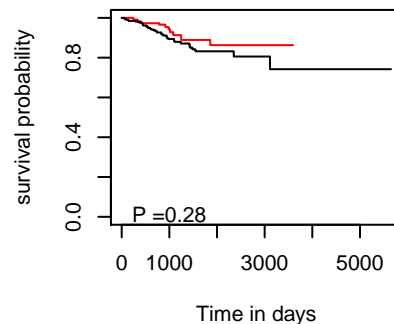**OS hsa-mir-1256**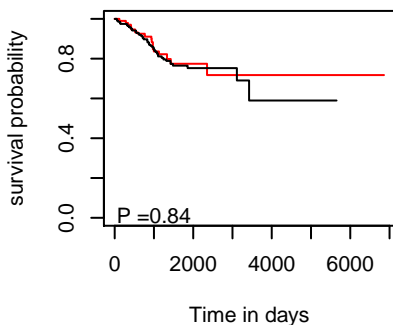**PFI hsa-mir-1256**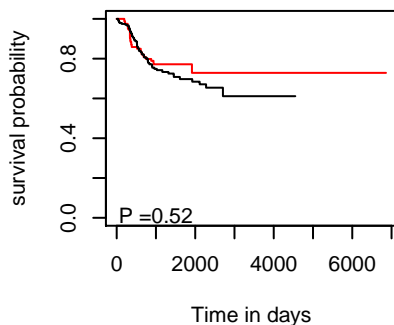**DFI hsa-mir-1256**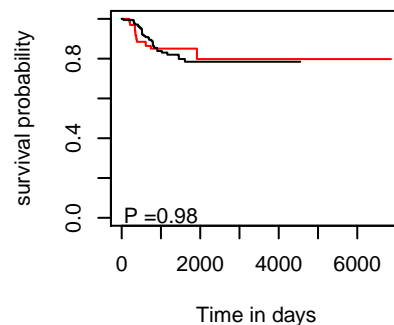

**DSS hsa-mir-1256**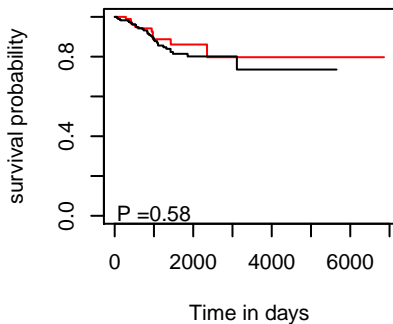**OS hsa-mir-3115**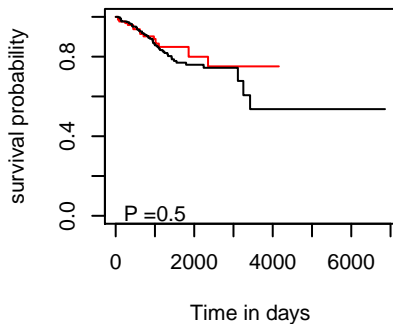**PFI hsa-mir-3115**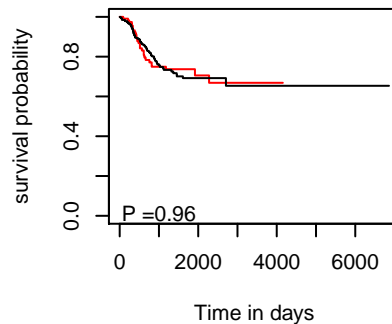**DFI hsa-mir-3115**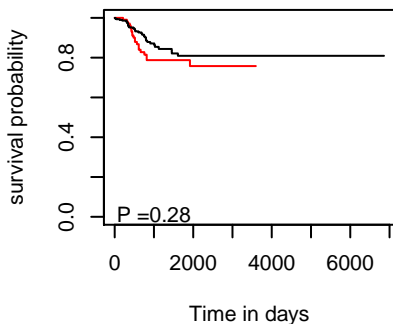**DSS hsa-mir-3115**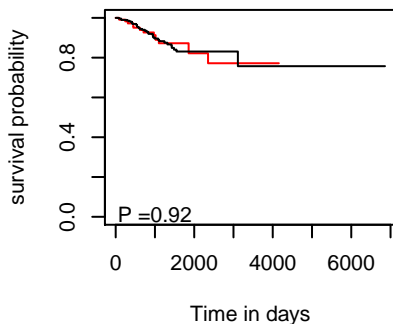**OS hsa-mir-152**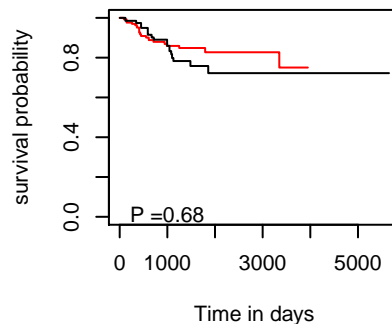**PFI hsa-mir-152**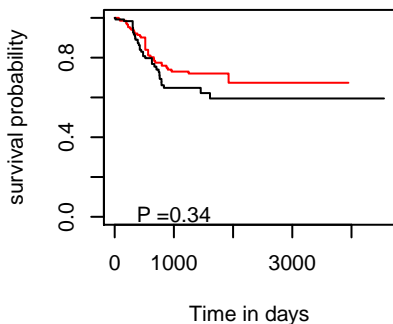**DFI hsa-mir-152**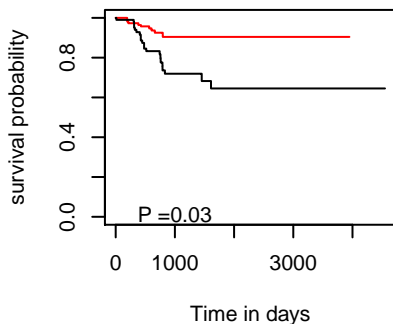**DSS hsa-mir-152**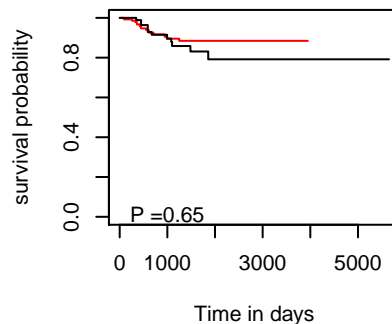

**OS hsa-mir-5001**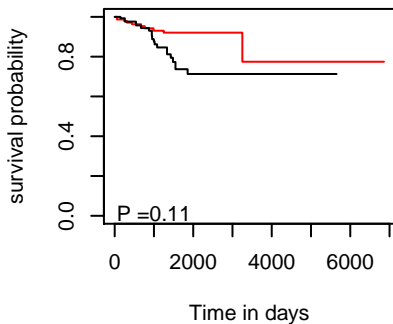**PFI hsa-mir-5001**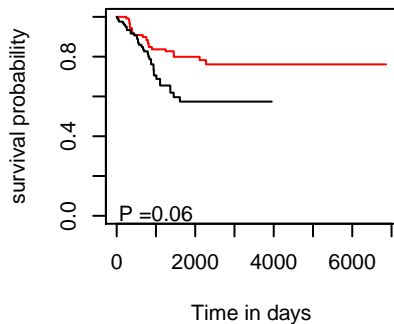**DFI hsa-mir-5001**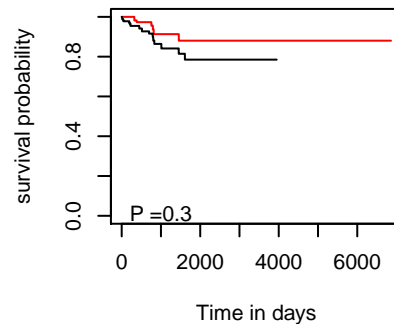**DSS hsa-mir-5001**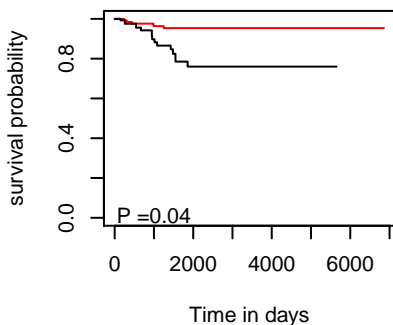**OS hsa-mir-1224**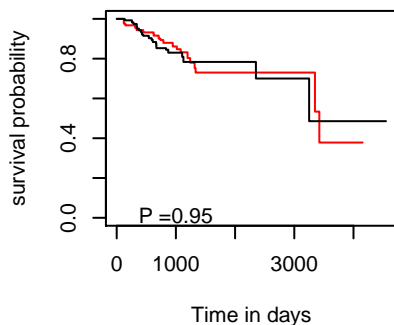**PFI hsa-mir-1224**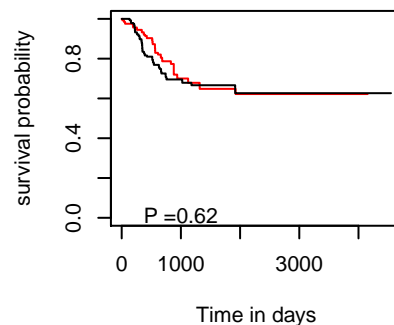**DFI hsa-mir-1224**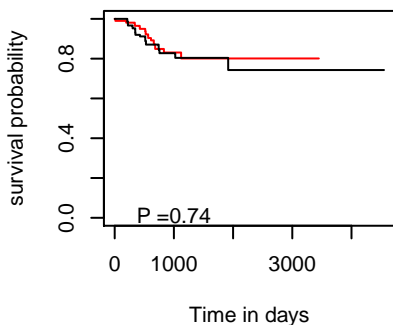**DSS hsa-mir-1224**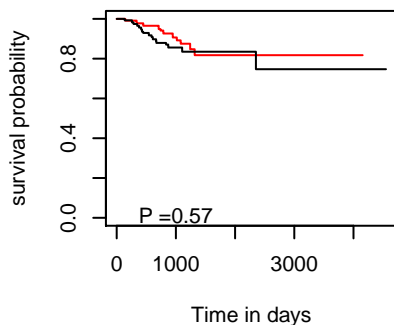**OS hsa-mir-1266**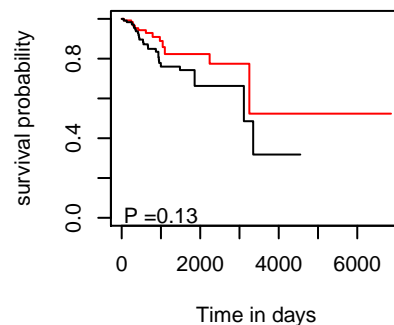

**PFI hsa-mir-1266**

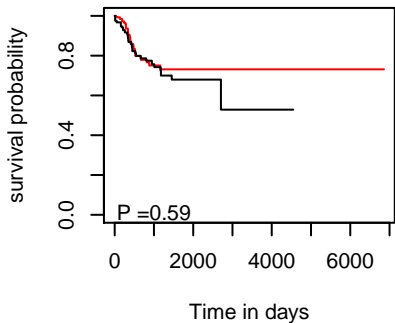

**DFI hsa-mir-1266**

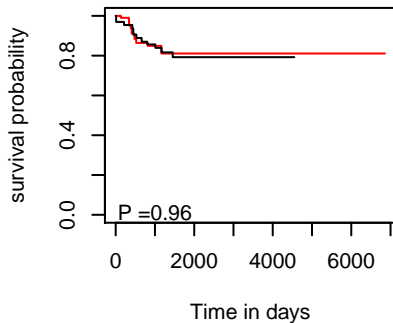

**DSS hsa-mir-1266**

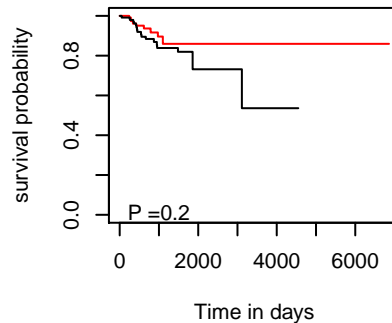

**OS hsa-mir-7-3**

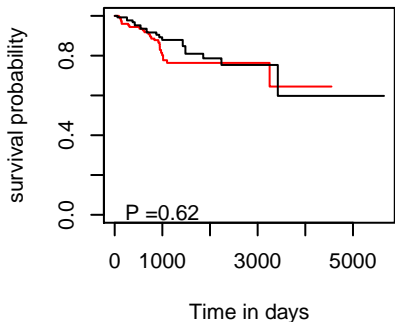

**PFI hsa-mir-7-3**

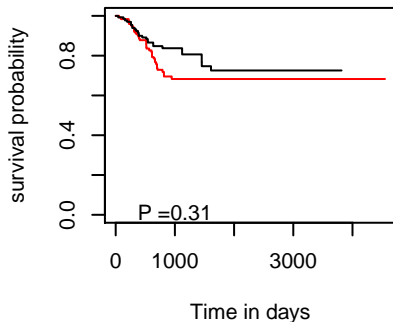

**DFI hsa-mir-7-3**

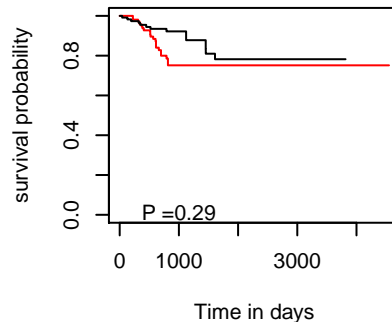

**DSS hsa-mir-7-3**

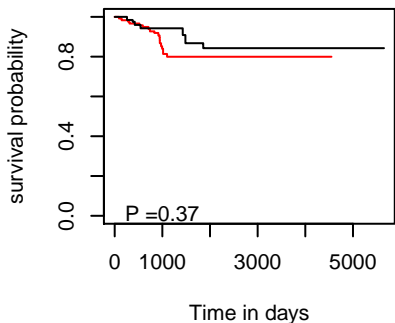

**OS hsa-mir-4745**

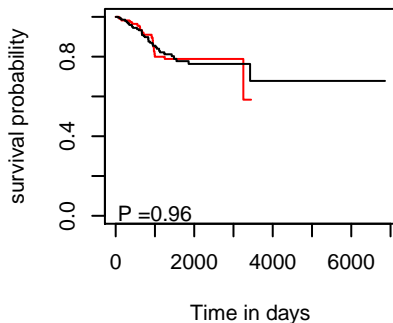

**PFI hsa-mir-4745**

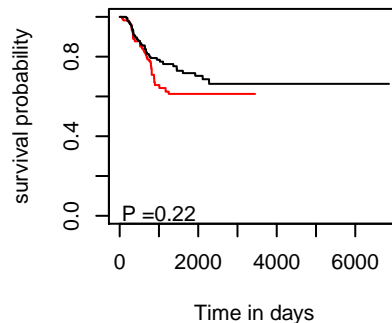



**DSS hsa-mir-449c**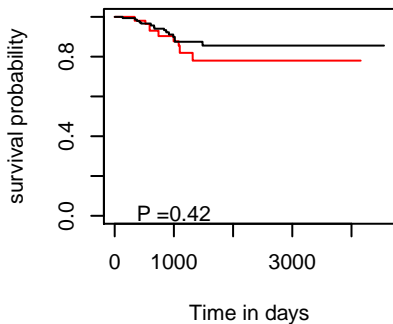**OS hsa-mir-4797**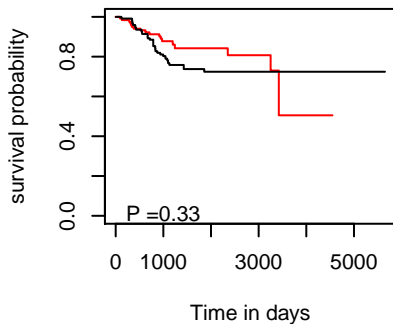**PFI hsa-mir-4797**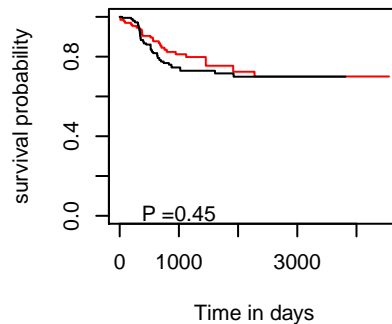**DFI hsa-mir-4797**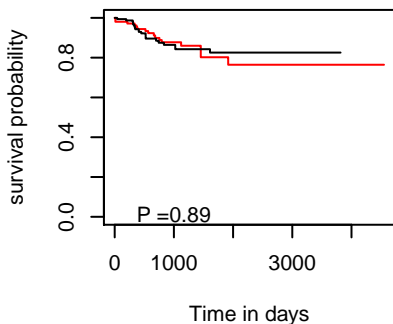**DSS hsa-mir-4797**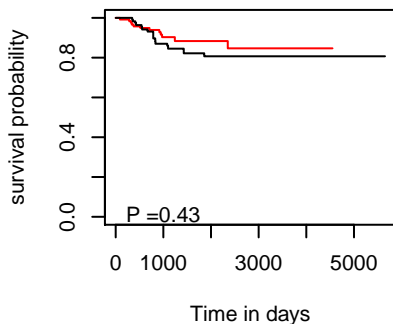**OS hsa-mir-4664**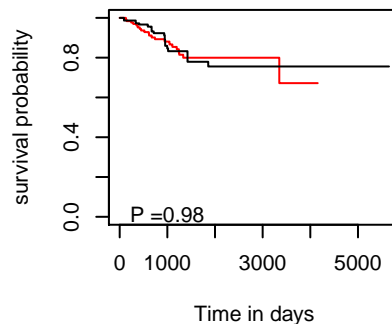**PFI hsa-mir-4664**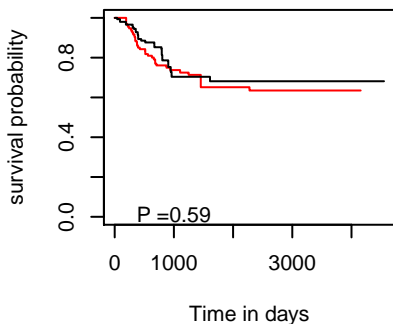**DFI hsa-mir-4664**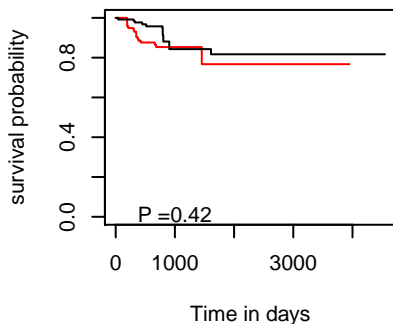**DSS hsa-mir-4664**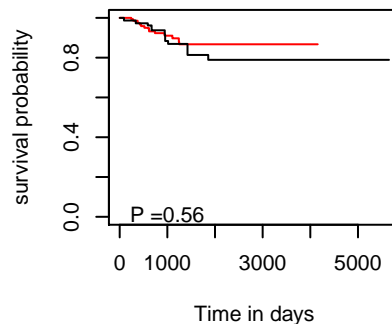

**OS hsa-mir-4789**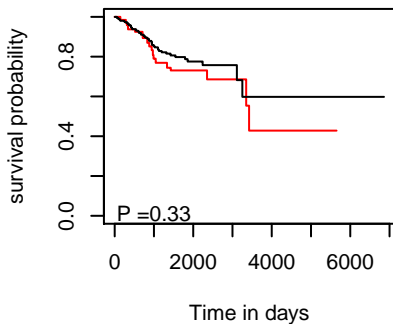**PFI hsa-mir-4789**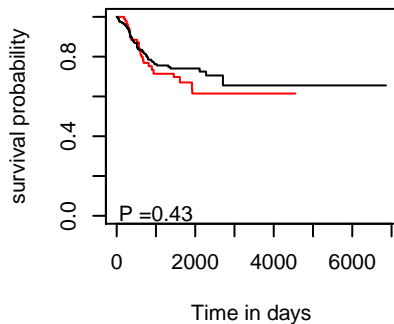**DFI hsa-mir-4789**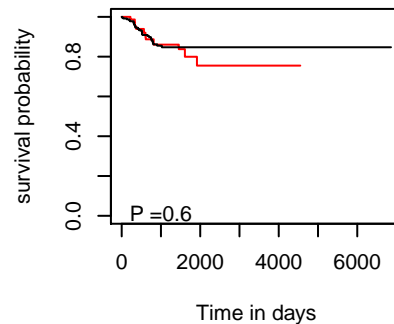**DSS hsa-mir-4789**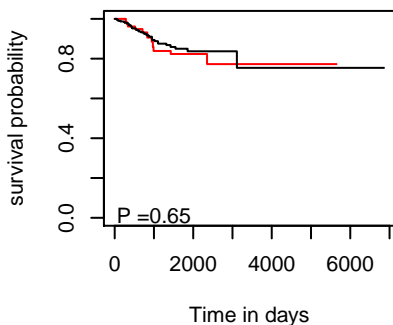**OS hsa-mir-7854**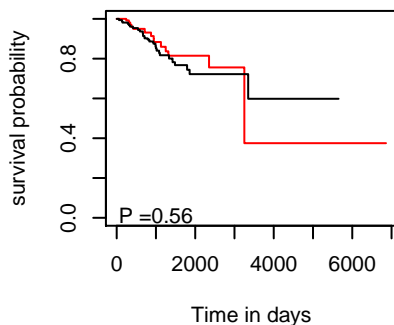**PFI hsa-mir-7854**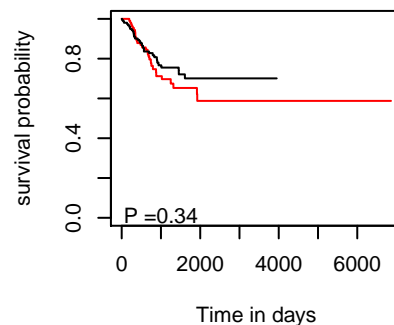**DFI hsa-mir-7854**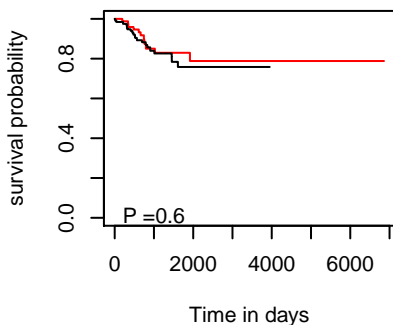**DSS hsa-mir-7854**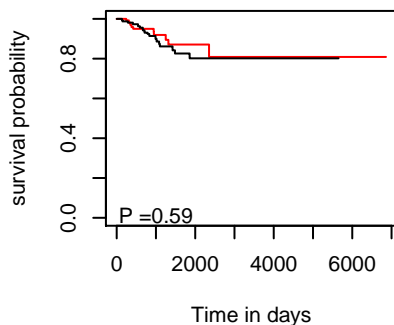**OS hsa-mir-4687**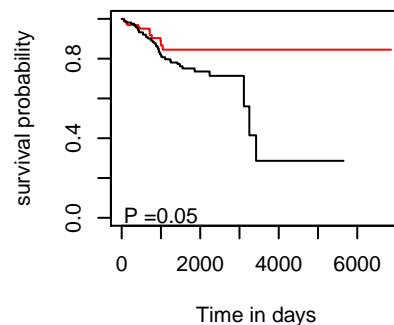

**PFI hsa-mir-4687**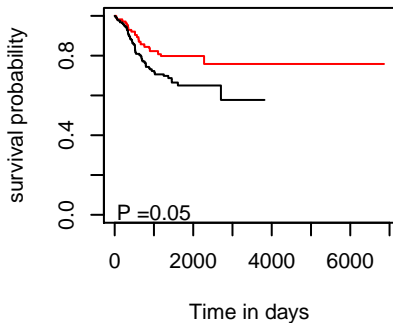**DFI hsa-mir-4687**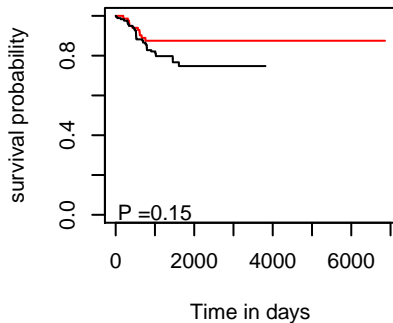**DSS hsa-mir-4687**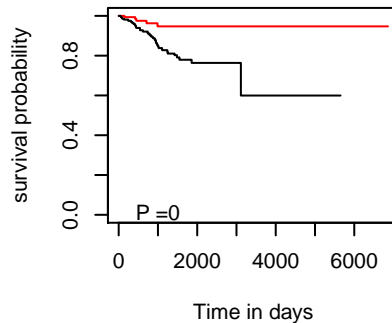**OS hsa-mir-551a**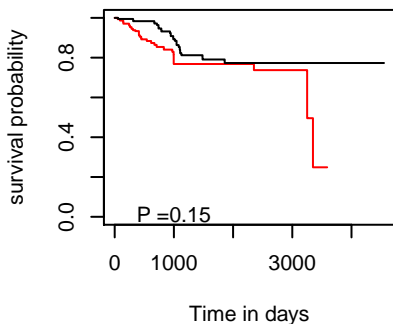**PFI hsa-mir-551a**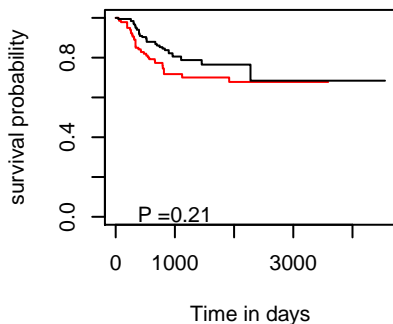**DFI hsa-mir-551a**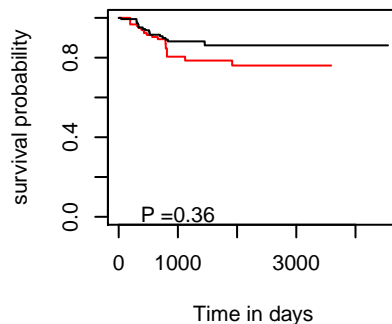**DSS hsa-mir-551a**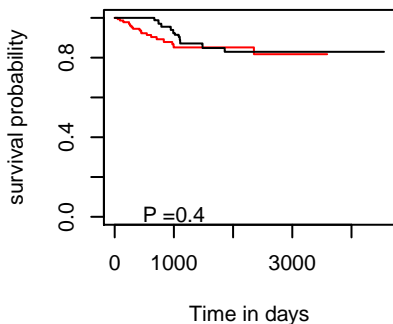**OS hsa-mir-6726**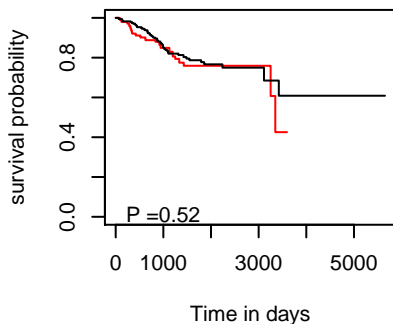**PFI hsa-mir-6726**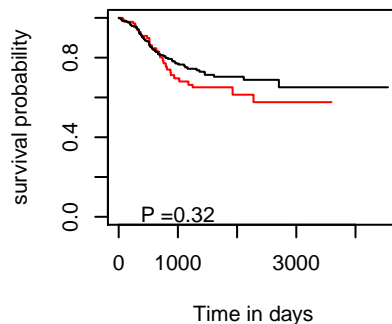

**DFI hsa-mir-6726**

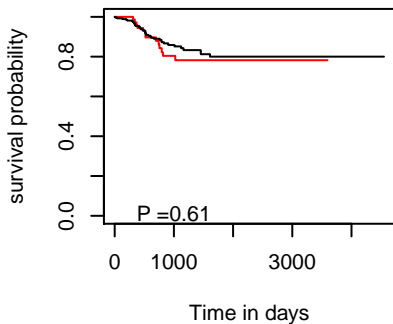

**DSS hsa-mir-6726**

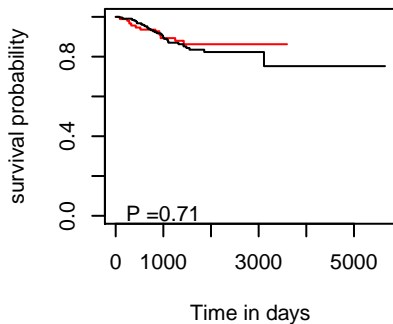

**OS hsa-mir-6728**

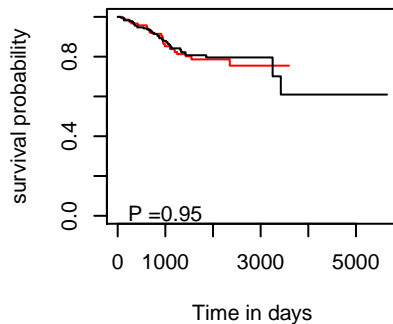

**PFI hsa-mir-6728**

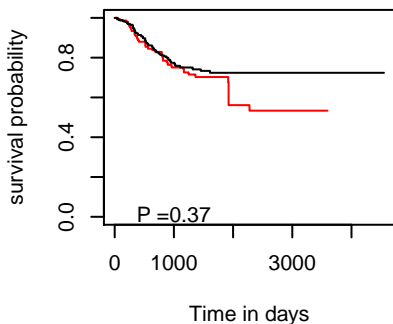

**DFI hsa-mir-6728**

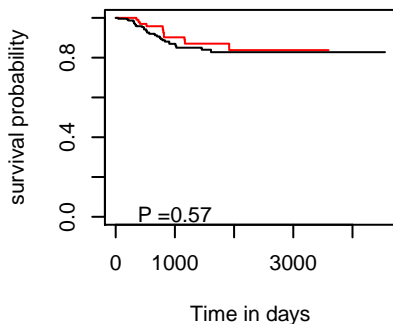

**DSS hsa-mir-6728**

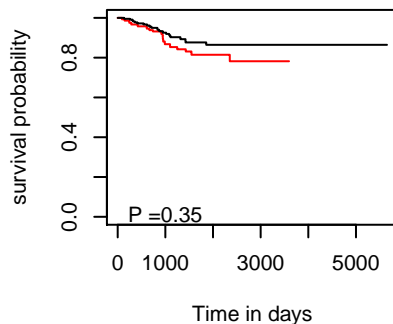

**OS hsa-mir-4763**

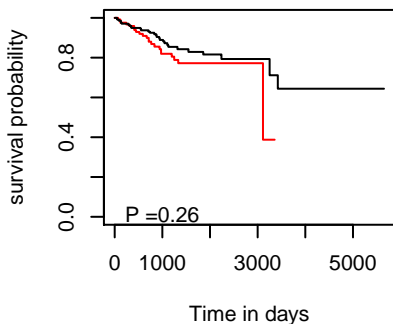

**PFI hsa-mir-4763**

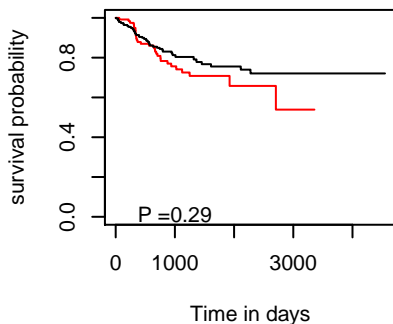

**DFI hsa-mir-4763**

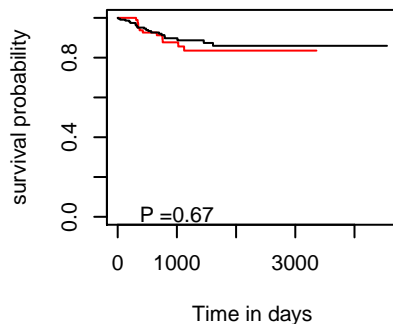

**DSS hsa-mir-4763**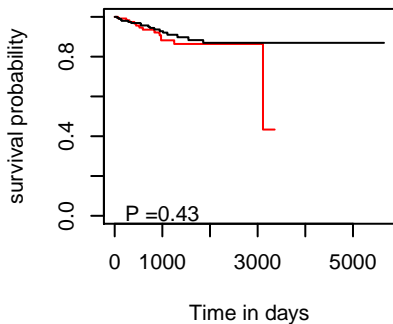**OS hsa-mir-4728**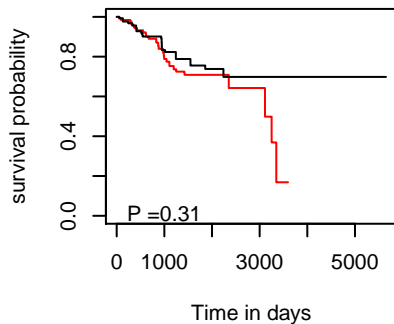**PFI hsa-mir-4728**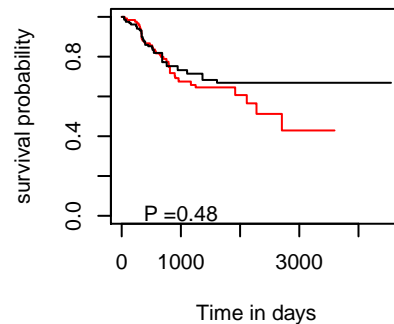**DFI hsa-mir-4728**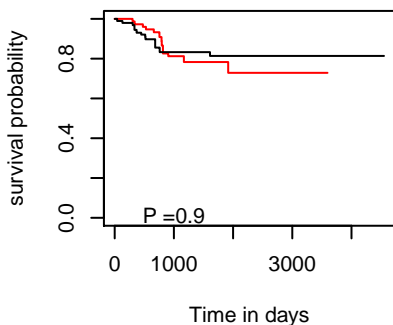**DSS hsa-mir-4728**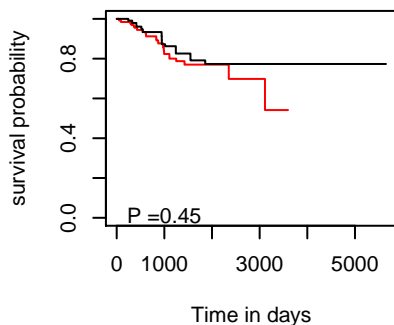**OS hsa-mir-1249**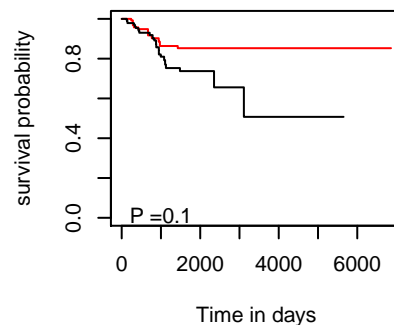**PFI hsa-mir-1249**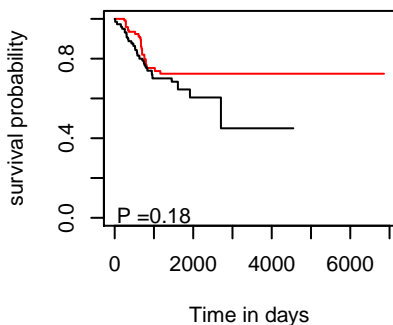**DFI hsa-mir-1249**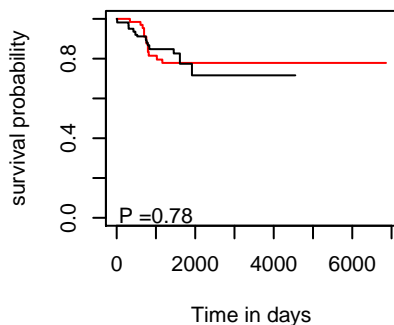**DSS hsa-mir-1249**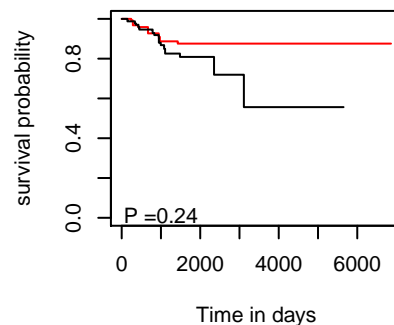

**OS hsa-mir-100**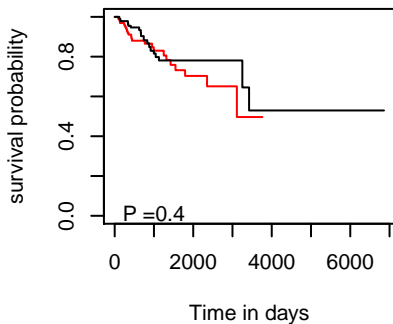**PFI hsa-mir-100**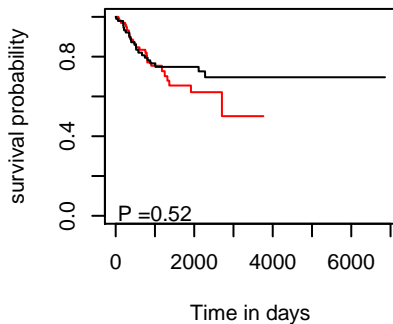**DFI hsa-mir-100**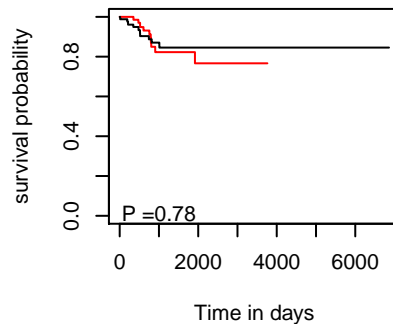**DSS hsa-mir-100**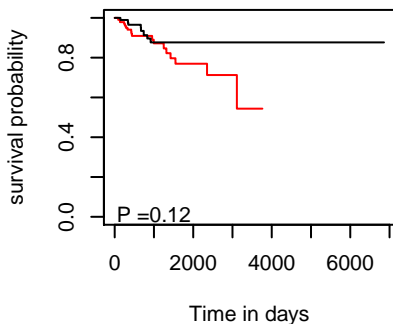**OS hsa-mir-210**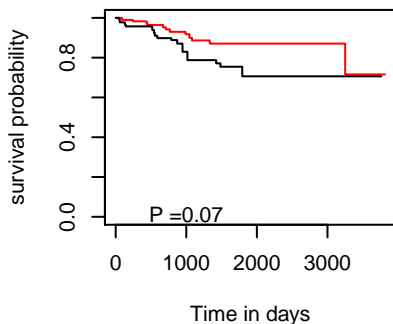**PFI hsa-mir-210**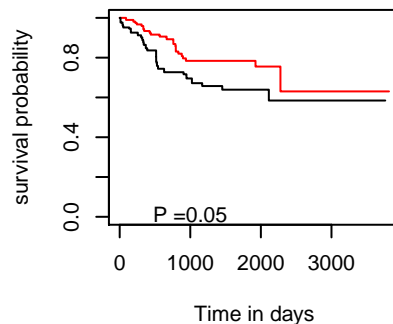**DFI hsa-mir-210**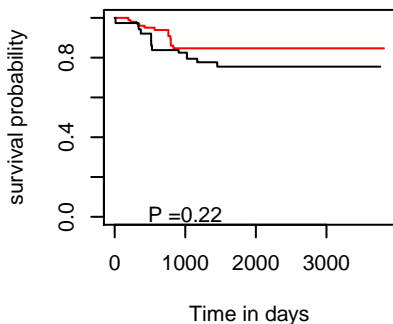**DSS hsa-mir-210**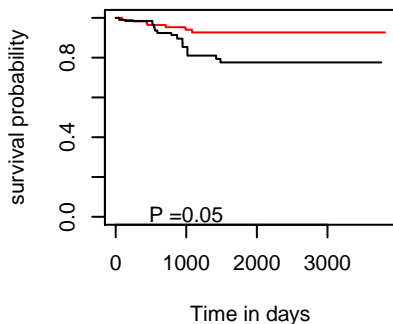**OS hsa-mir-7846**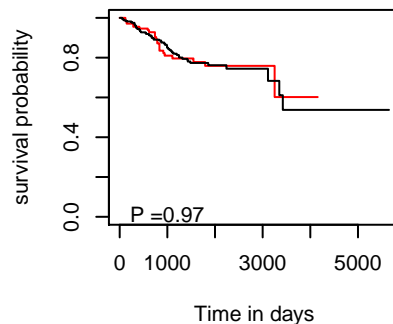

**PFI hsa-mir-7846**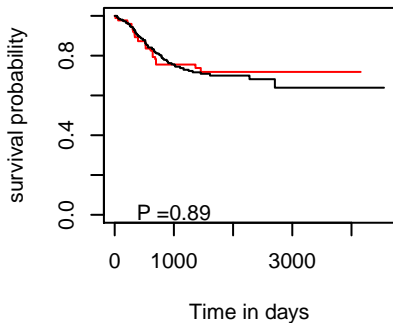**DFI hsa-mir-7846**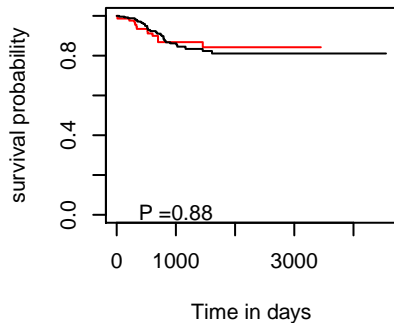**DSS hsa-mir-7846**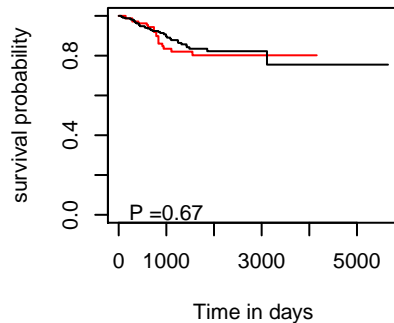**OS hsa-mir-6730**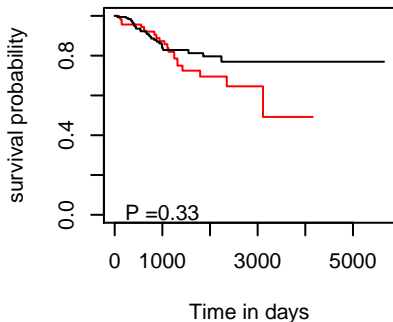**PFI hsa-mir-6730**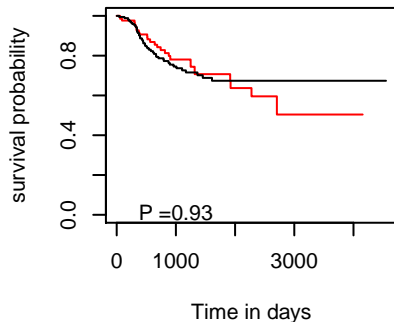**DFI hsa-mir-6730**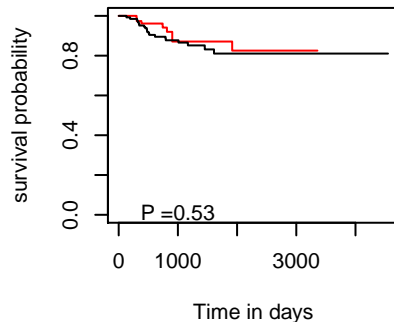**DSS hsa-mir-6730**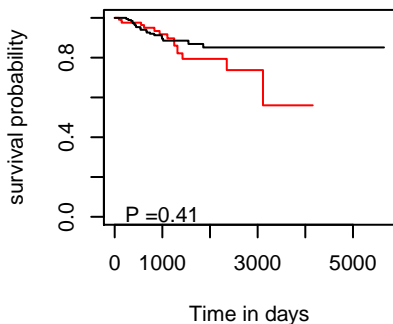**OS hsa-mir-4700**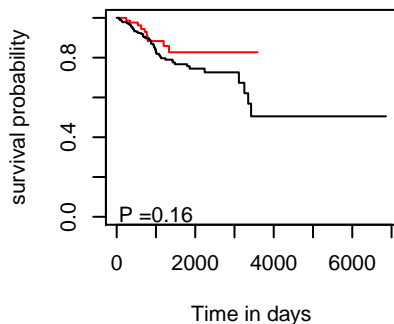**PFI hsa-mir-4700**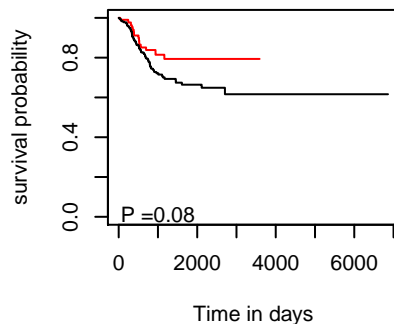

**DFI hsa-mir-4700**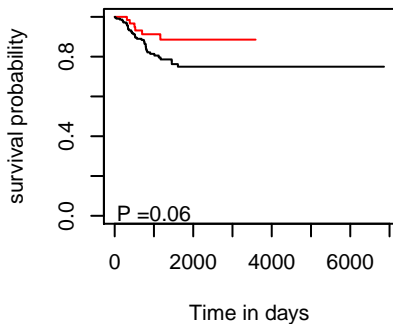**DSS hsa-mir-4700**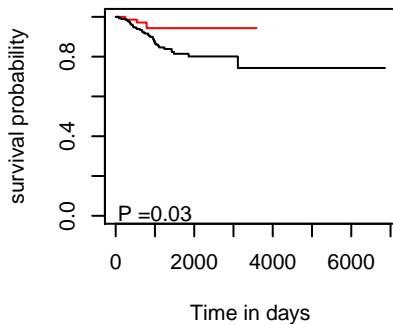**OS hsa-mir-34c**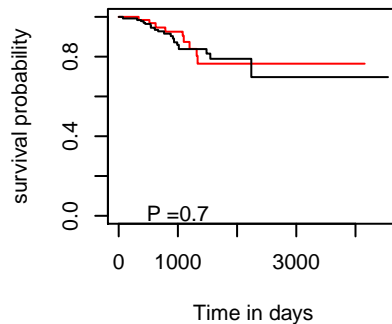**PFI hsa-mir-34c**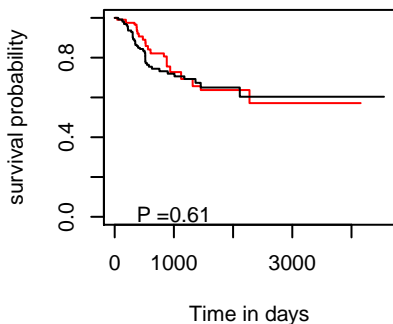**DFI hsa-mir-34c**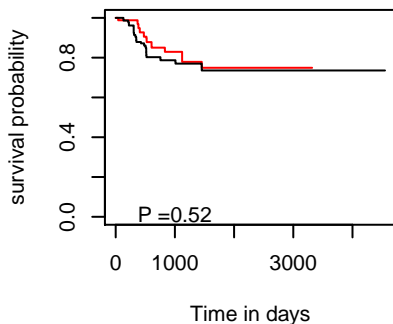**DSS hsa-mir-34c**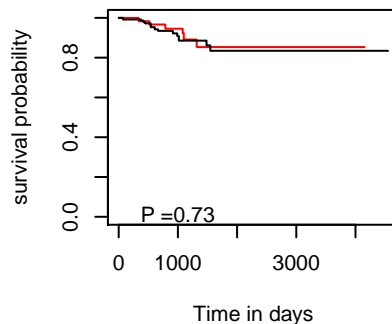**OS hsa-mir-6723**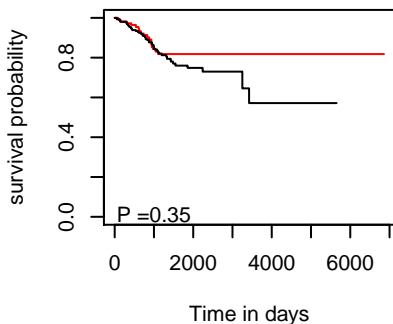**PFI hsa-mir-6723**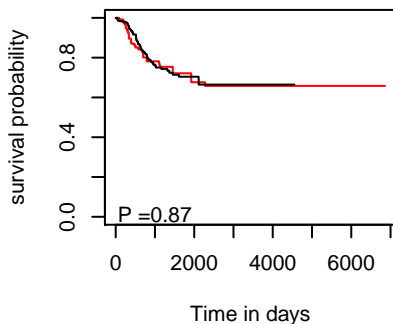**DFI hsa-mir-6723**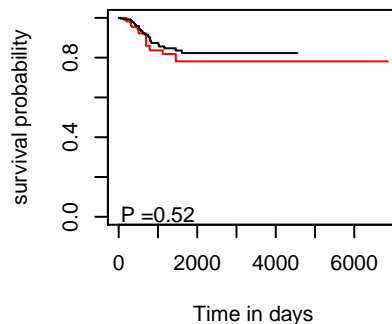

**DSS hsa-mir-6723**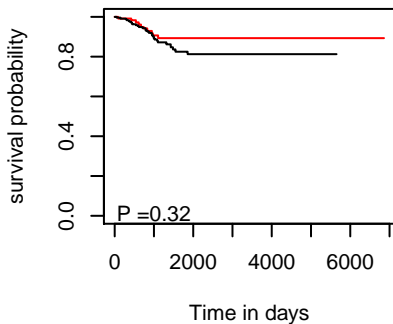**OS hsa-mir-497**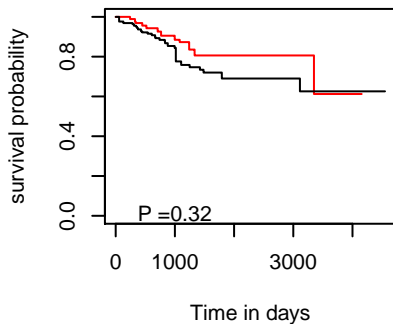**PFI hsa-mir-497**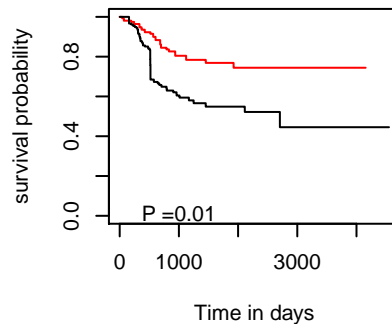**DFI hsa-mir-497**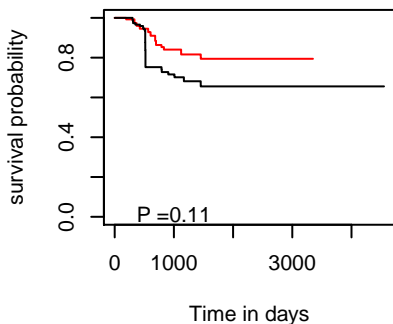**DSS hsa-mir-497**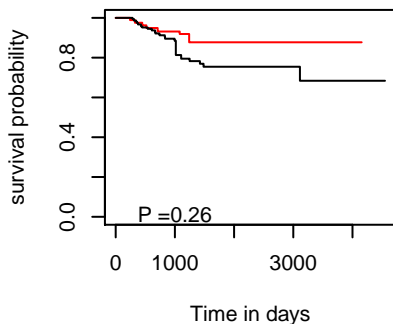**OS hsa-mir-6868**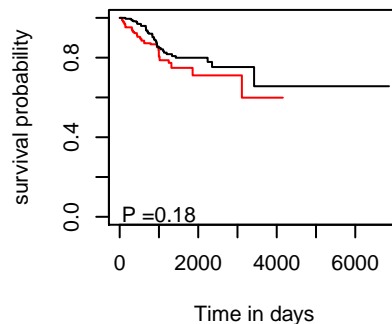**PFI hsa-mir-6868**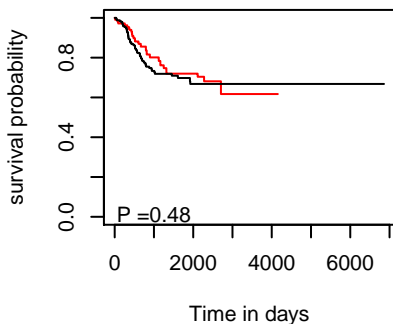**DFI hsa-mir-6868**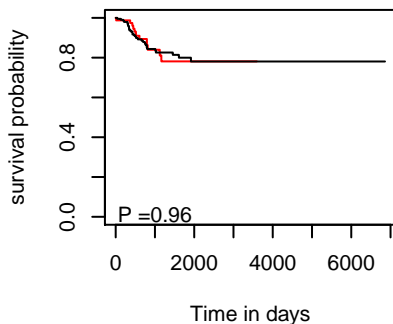**DSS hsa-mir-6868**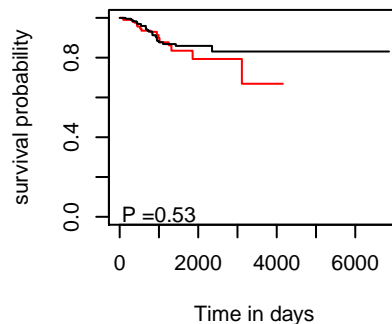

**OS hsa-mir-483**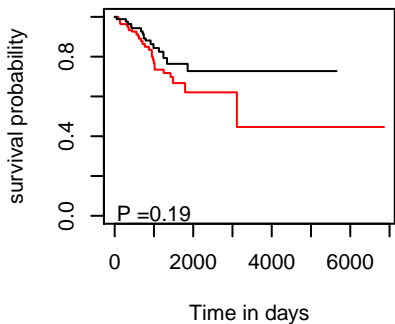**PFI hsa-mir-483**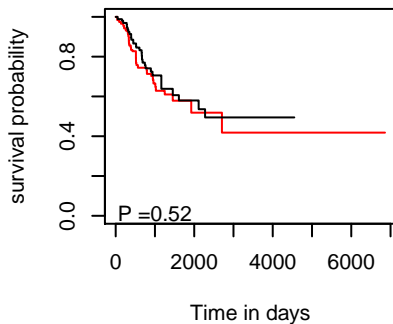**DFI hsa-mir-483**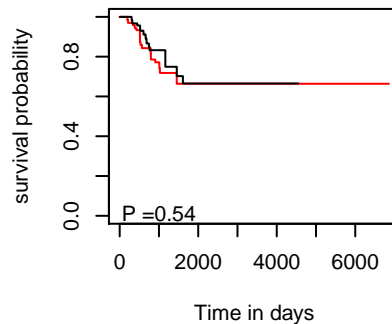**DSS hsa-mir-483**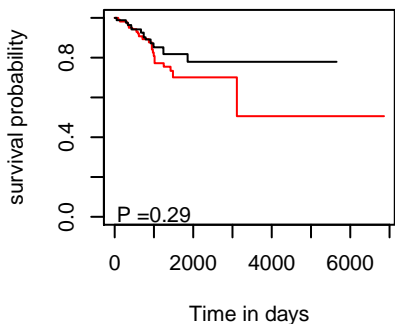**OS hsa-mir-4800**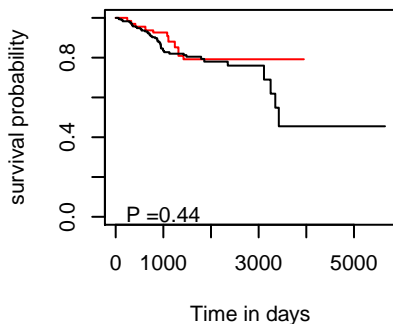**PFI hsa-mir-4800**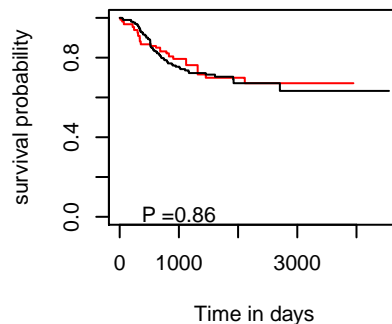**DFI hsa-mir-4800**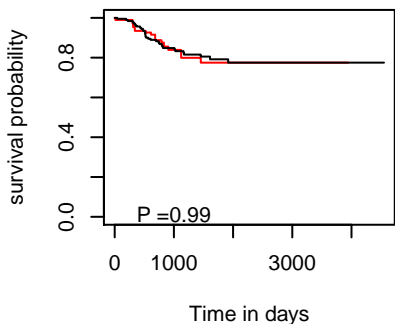**DSS hsa-mir-4800**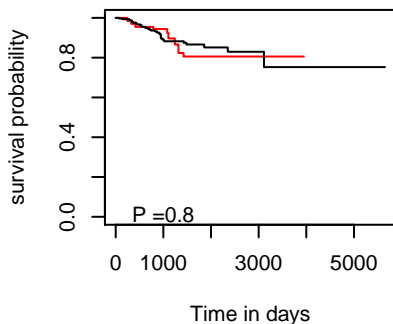**OS hsa-mir-4662a**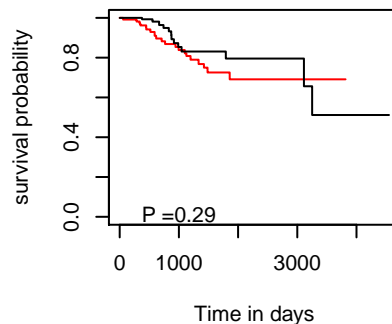

**PFI hsa-mir-4662a**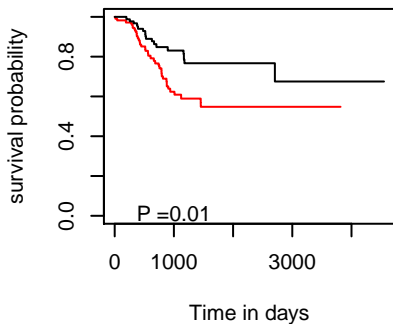**DFI hsa-mir-4662a**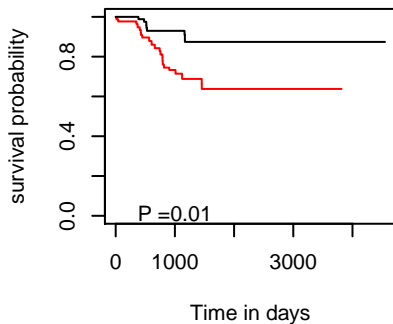**DSS hsa-mir-4662a**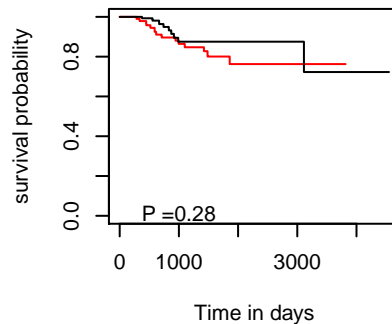**OS hsa-mir-153-1**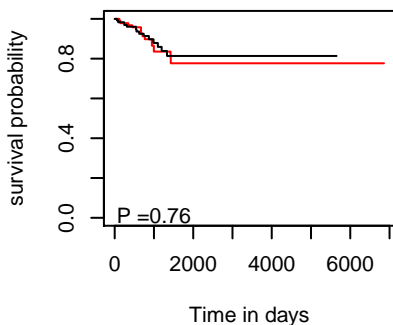**PFI hsa-mir-153-1**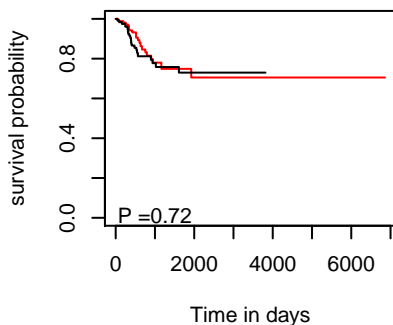**DFI hsa-mir-153-1**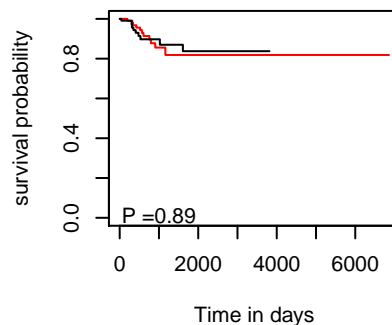**DSS hsa-mir-153-1**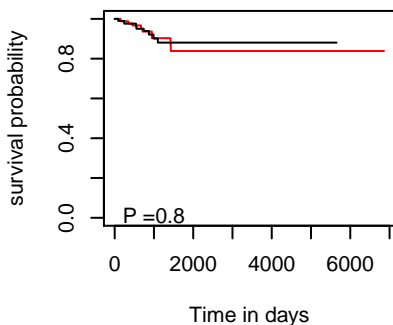**OS hsa-mir-6884**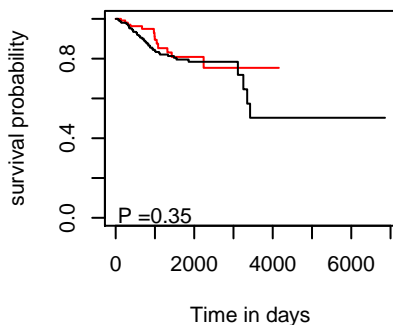**PFI hsa-mir-6884**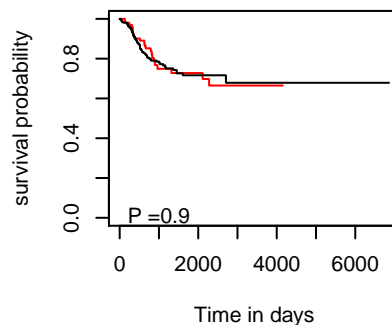

**DFI hsa-mir-6884**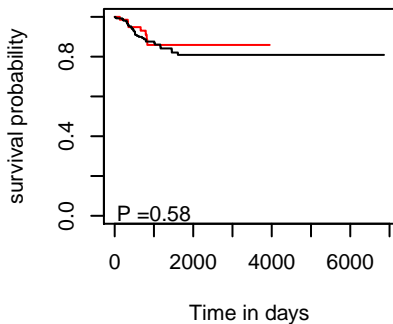**DSS hsa-mir-6884**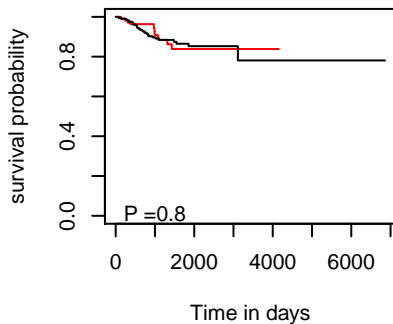**OS hsa-mir-4510**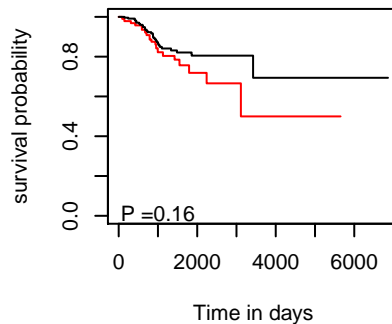**PFI hsa-mir-4510**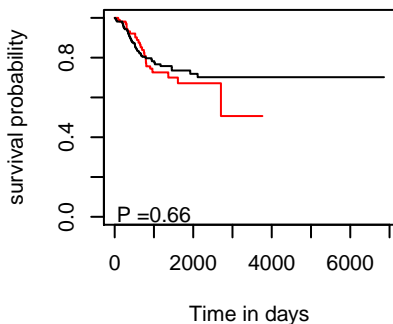**DFI hsa-mir-4510**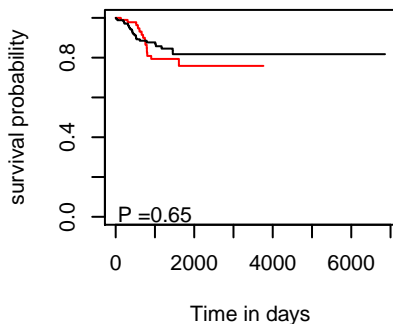**DSS hsa-mir-4510**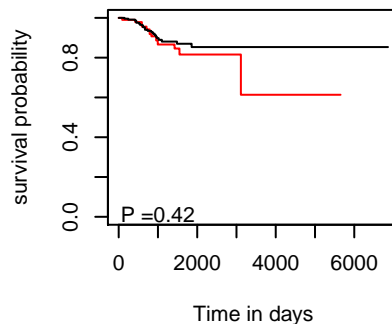**OS hsa-mir-4326**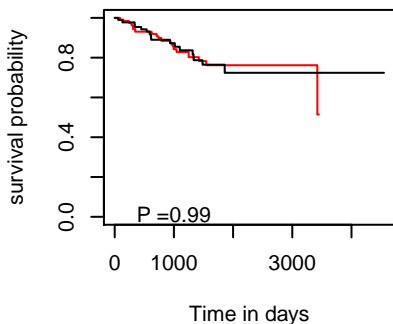**PFI hsa-mir-4326**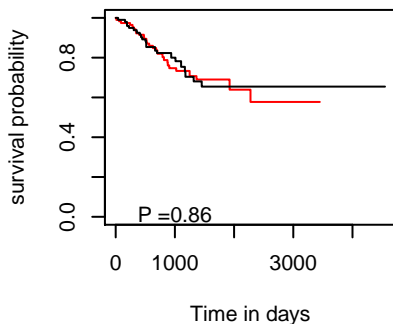**DFI hsa-mir-4326**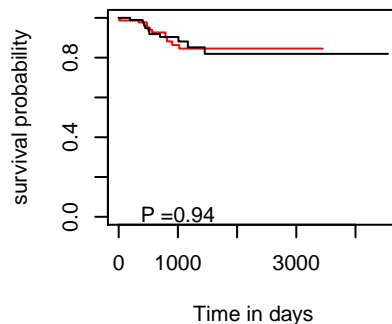

**DSS hsa-mir-4326**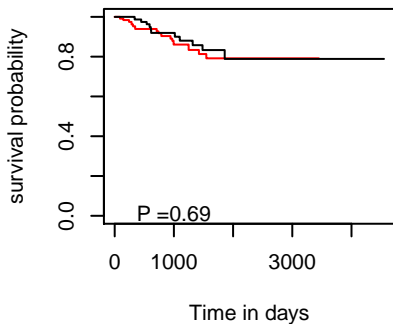**OS hsa-mir-628**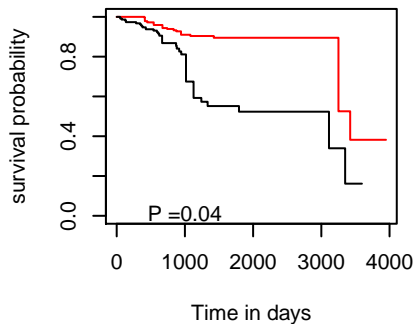**PFI hsa-mir-628**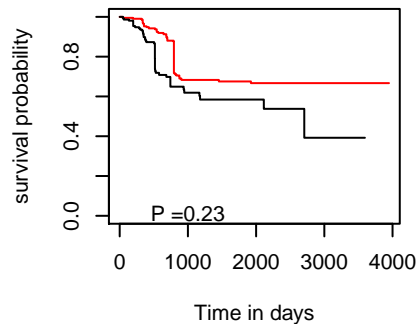**DFI hsa-mir-628**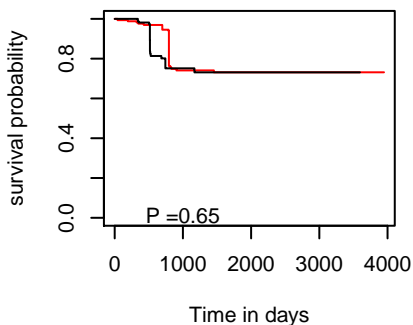**DSS hsa-mir-628**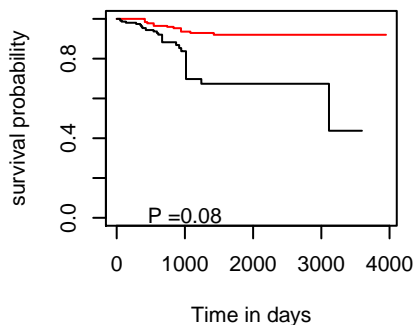**OS hsa-mir-196a-1**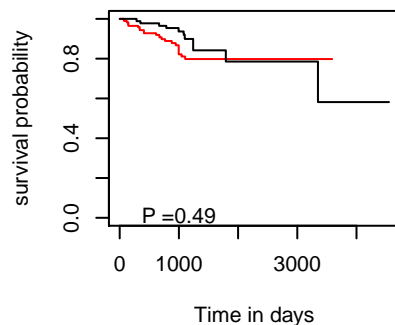**PFI hsa-mir-196a-1**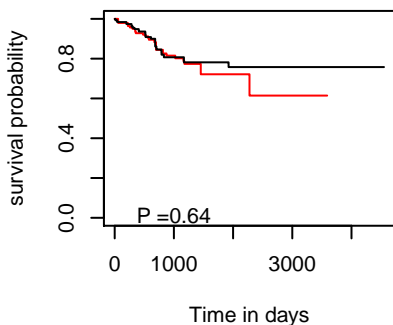**DFI hsa-mir-196a-1**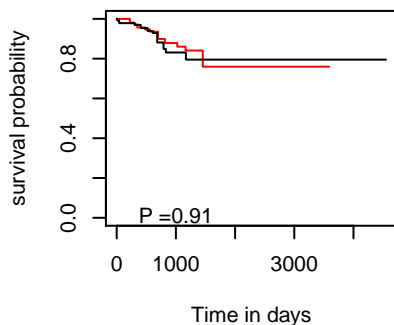**DSS hsa-mir-196a-1**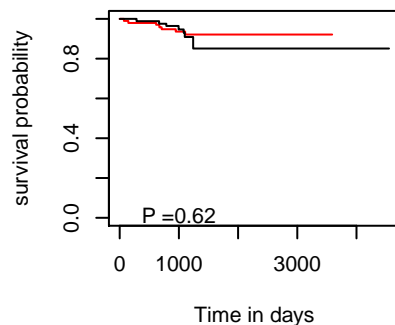

**OS hsa-mir-6783**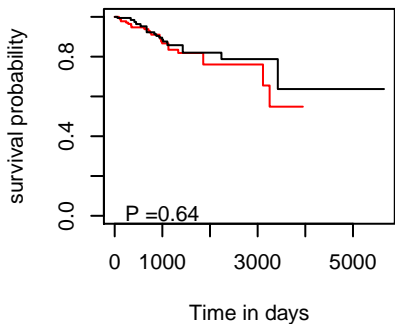**PFI hsa-mir-6783**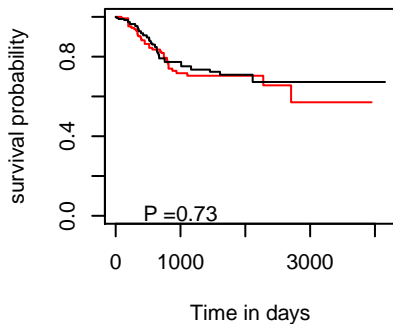**DFI hsa-mir-6783**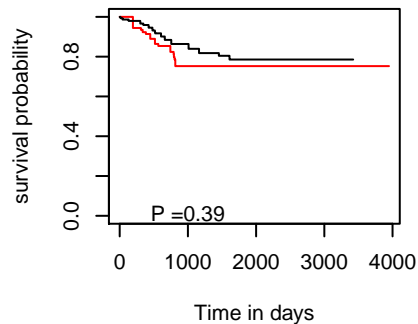**DSS hsa-mir-6783**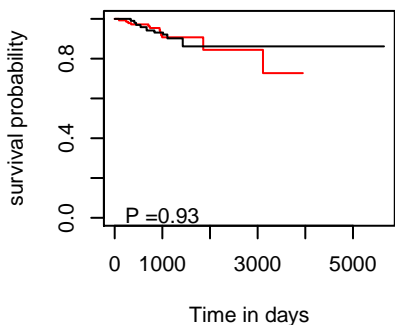**OS hsa-mir-548d-1**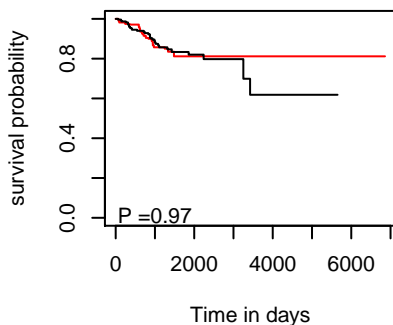**PFI hsa-mir-548d-1**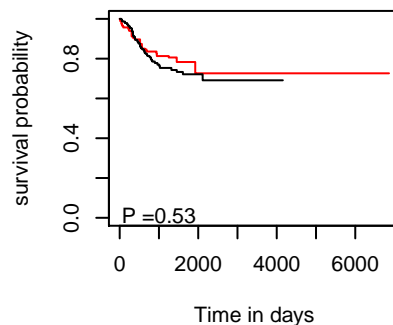**DFI hsa-mir-548d-1**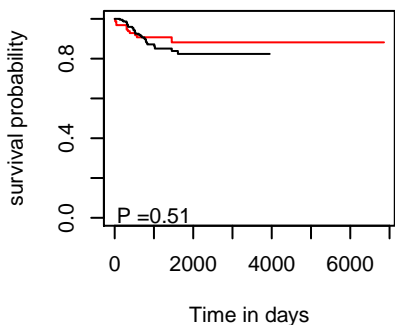**DSS hsa-mir-548d-1**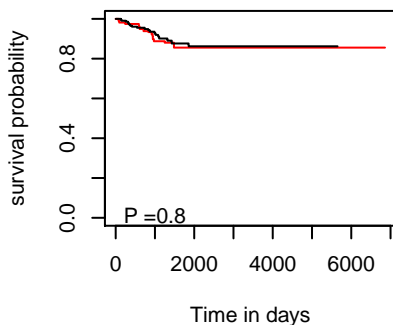**OS hsa-mir-1284**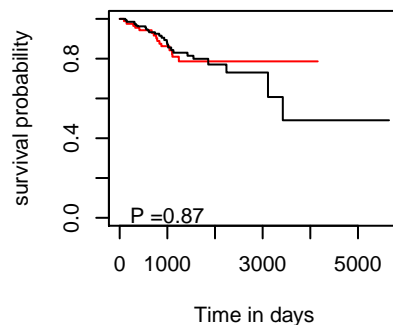

**PFI hsa-mir-1284**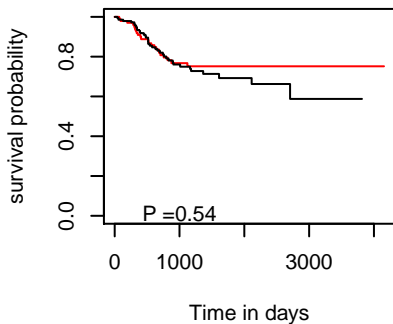**DFI hsa-mir-1284**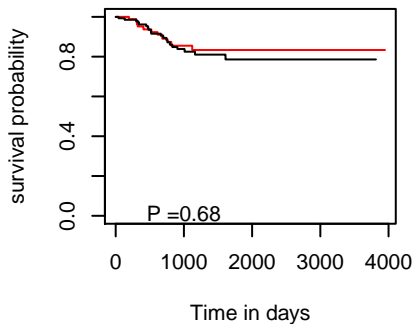**DSS hsa-mir-1284**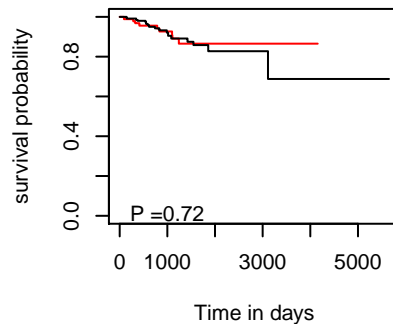**OS hsa-mir-3189**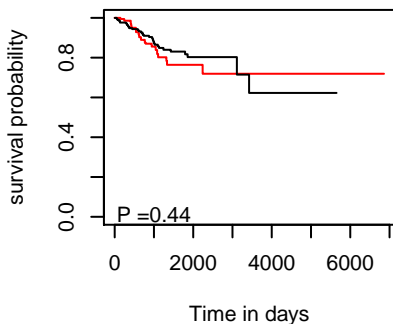**PFI hsa-mir-3189**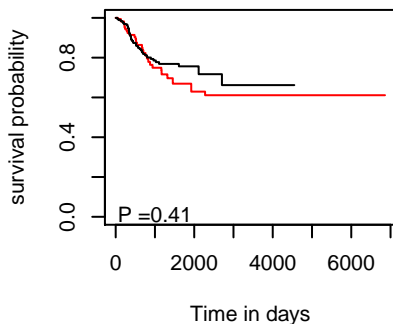**DFI hsa-mir-3189**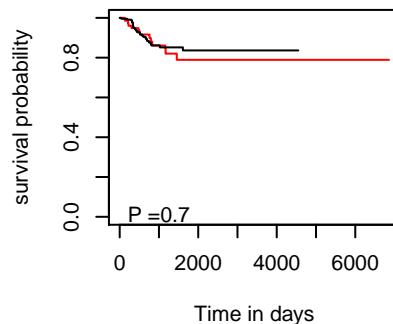**DSS hsa-mir-3189**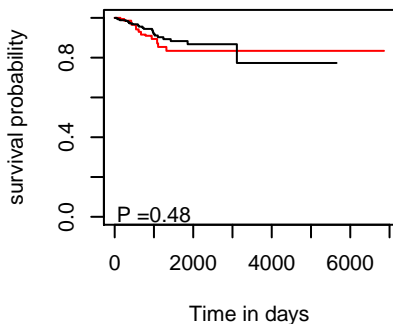**OS hsa-let-7g**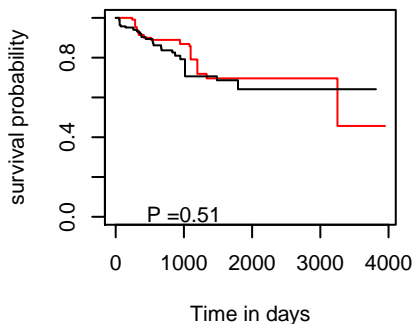**PFI hsa-let-7g**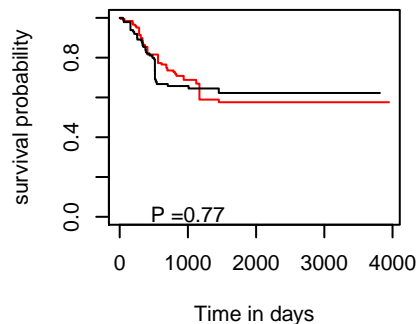



**DSS hsa-mir-33a**

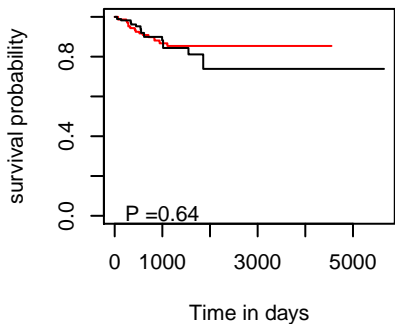

**OS hsa-mir-6878**

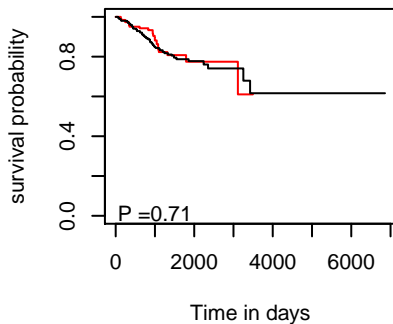

**PFI hsa-mir-6878**

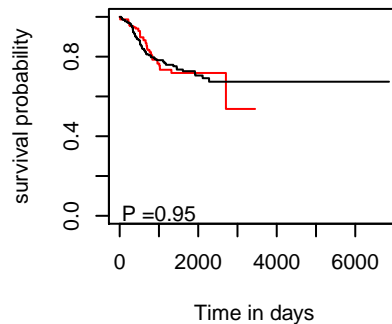

**DFI hsa-mir-6878**

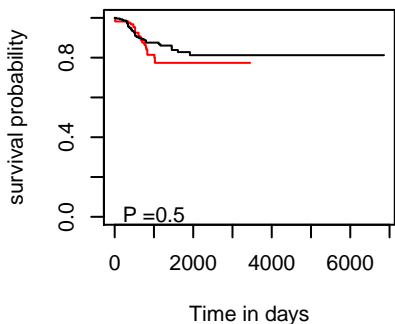

**DSS hsa-mir-6878**

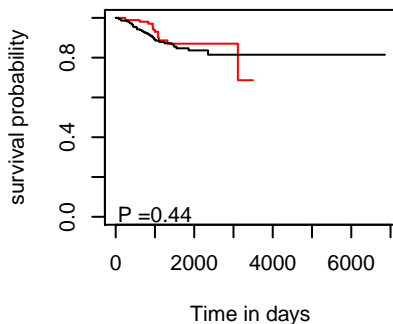

Supplement: MOESM27 [file 41598_2022_7628_MOESM27_ESM.pdf]
