# Supplementary material for: New Thinking on Read-Aloud.
Source: Springer Nature journal article supplement (doi:10.1038/s41598-022-07628-z), 2001-01-01

# Computing microRNA-gene interaction networks in pan-cancer using miRDriver

Banabithi Bose, Matthew Moravec, and Serdar Bozdag

## Supplemental Figure S20

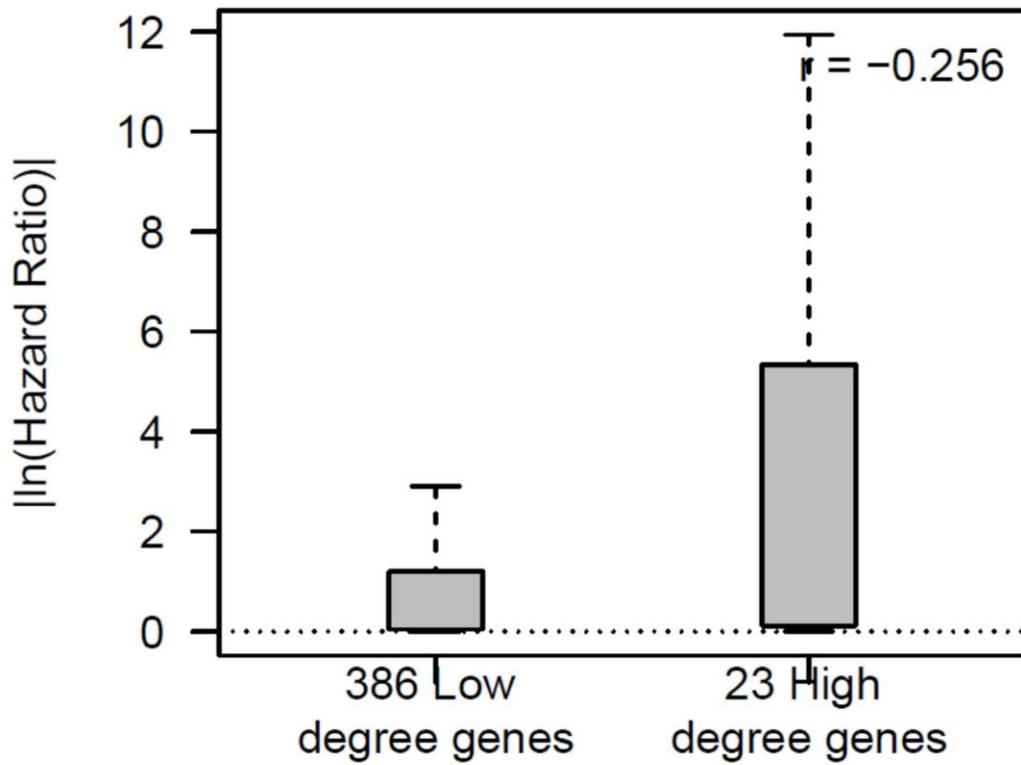

Boxplots of absolute values of natural logarithm of hazard ratios in high-degree and low-degree genes with  $r$  value of Mann-Whitney test.

**BLCA OS**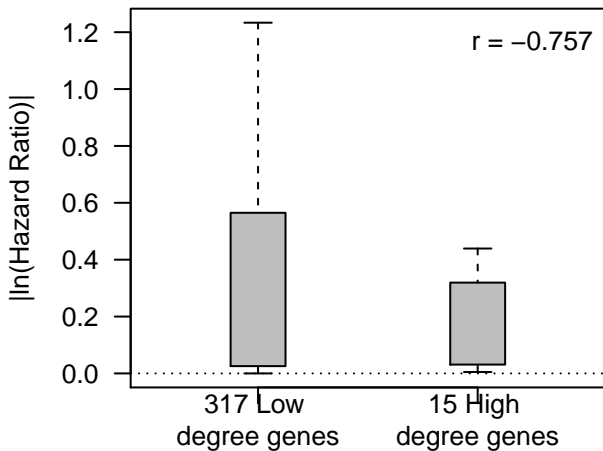**BLCA PFI**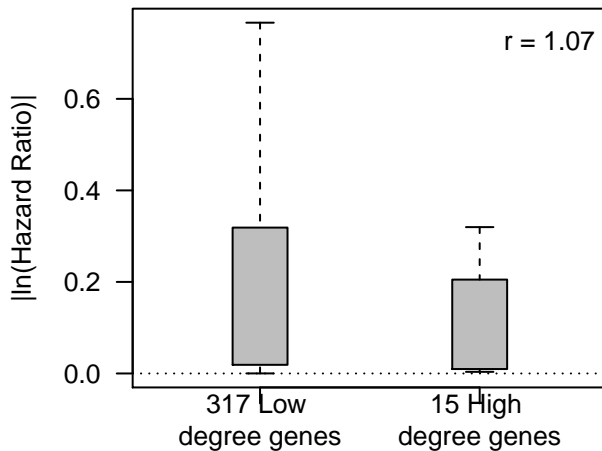**BLCA DSS**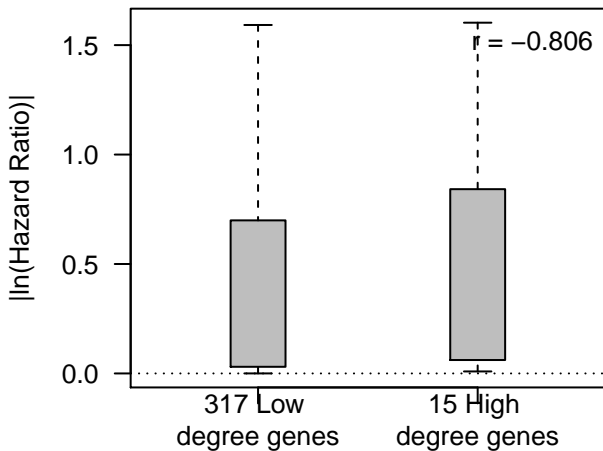**BLCA DFI**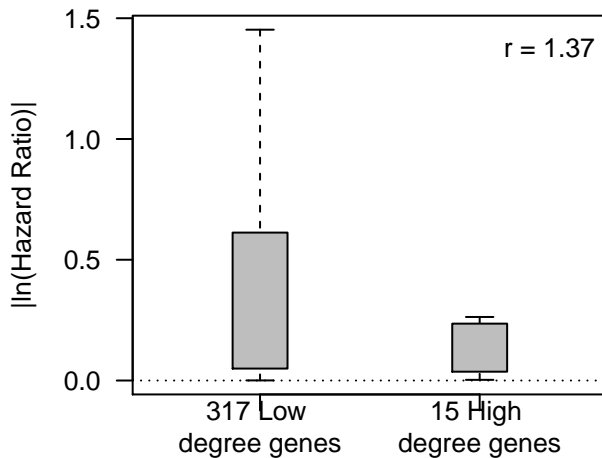

ESCA OS

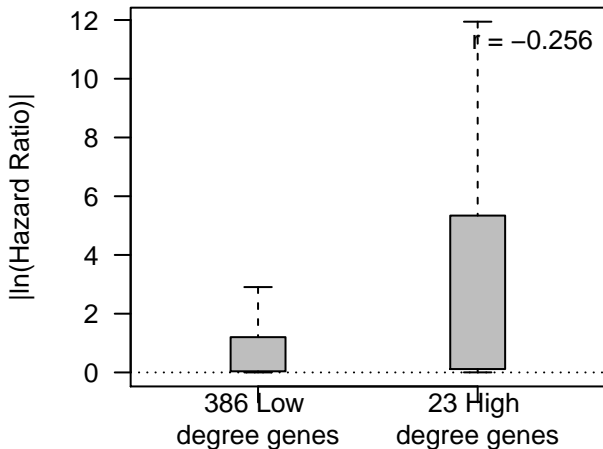

ESCA PFI

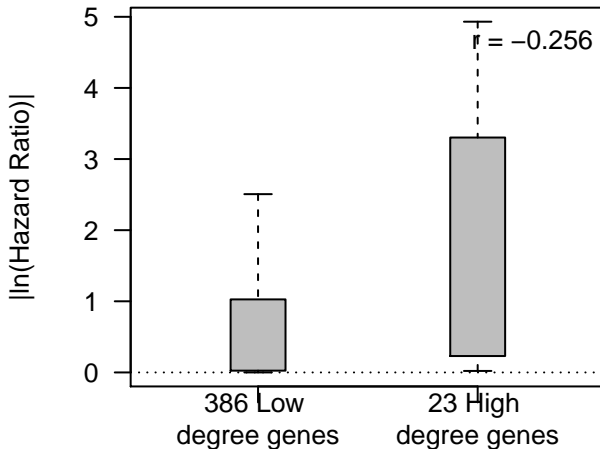

ESCA DSS

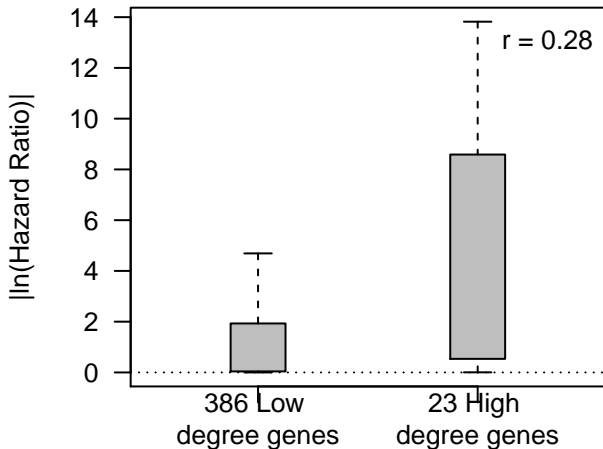

ESCA DFI

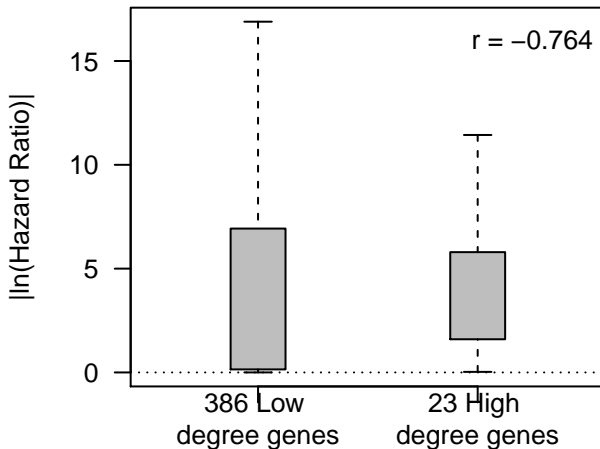

**HNSC OS**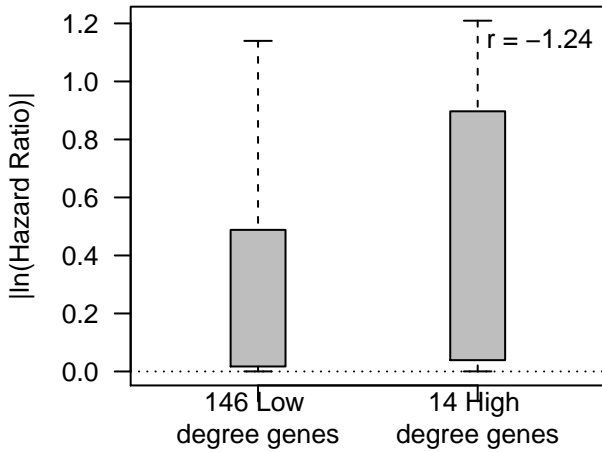**HNSC PFI**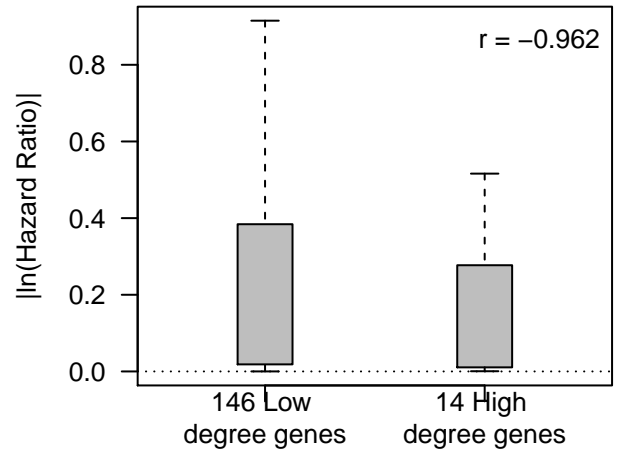**HNSC DSS**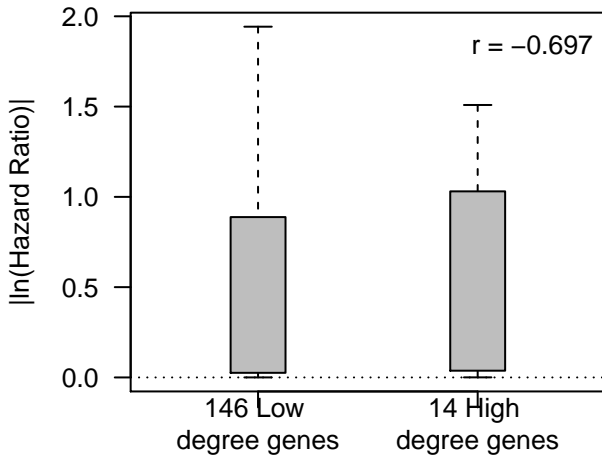**HNSC DFI**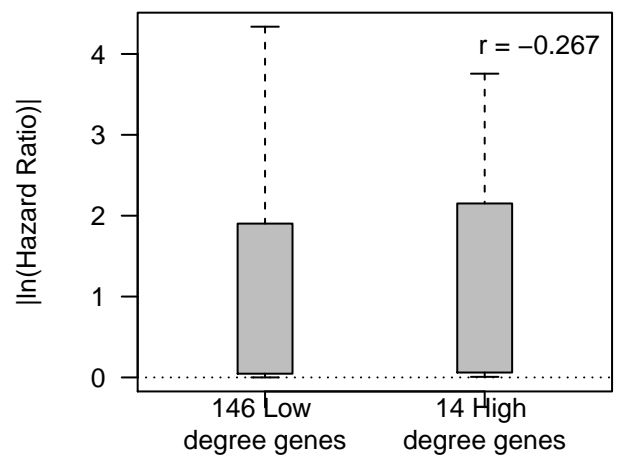

**PAAD OS**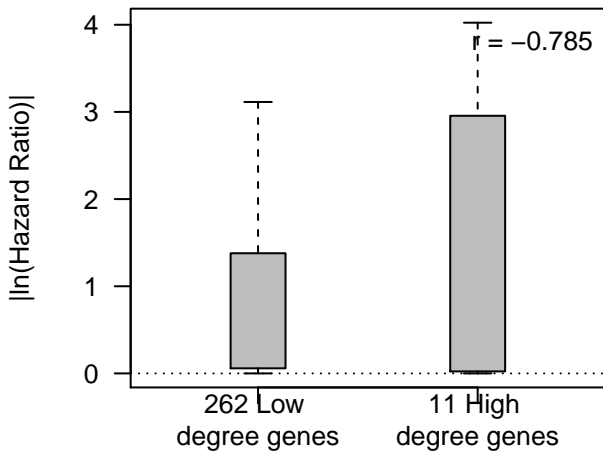**PAAD PFI**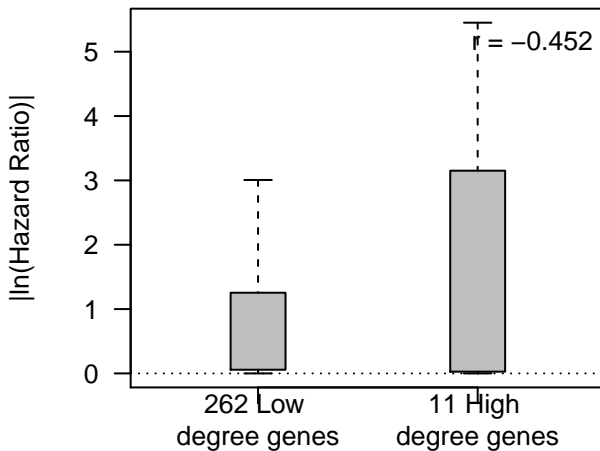**PAAD DSS**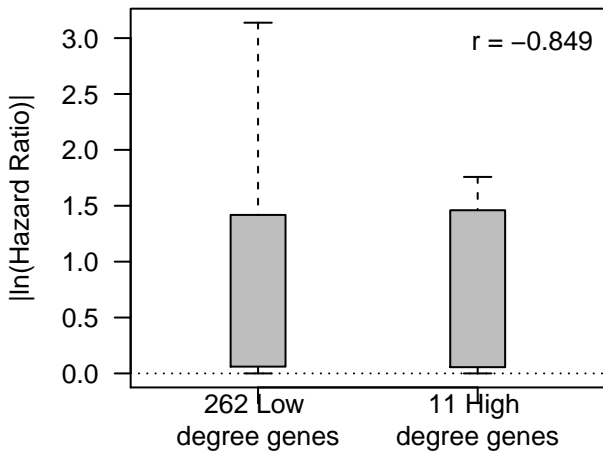**PAAD DFI**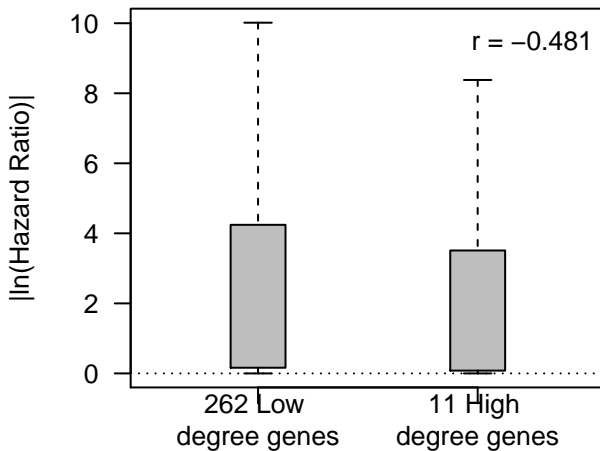

Supplement: MOESM29 [file 41598_2022_7628_MOESM29_ESM.pdf]
