# Supplementary material for: New Thinking on Read-Aloud.
Source: Springer Nature journal article supplement (doi:10.1038/s41598-022-07628-z), 2001-01-01
Supplement: MOESM28 [file 41598_2022_7628_MOESM28_ESM.pdf]

# Computing microRNA-gene interaction networks in pan-cancer using miRDriver

Banabithi Bose, Matthew Moravec, and Serdar Bozdog

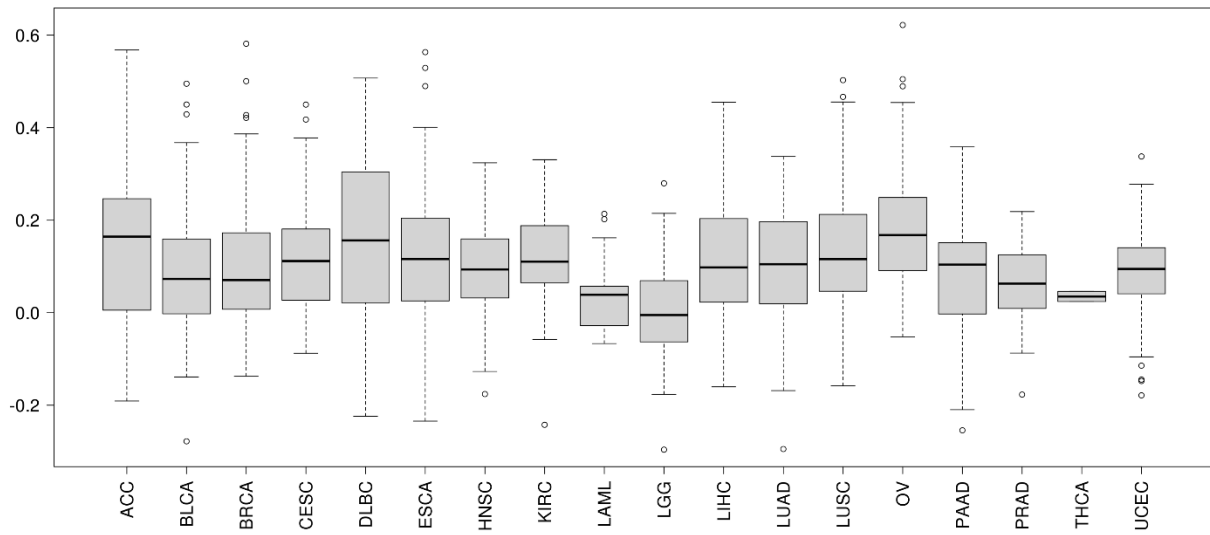

Supplemental Figure S19: Boxplots showing the Spearman correlation values between copy number and expression across all the samples of the computed miRNAs of miRDriver in eighteen different cancer types. There is a positive median distribution of correlations across all cancer types.
