# Supplementary material for: New Thinking on Read-Aloud.
Source: Springer Nature journal article supplement (doi:10.1038/s41598-022-07628-z), 2001-01-01

# Computing microRNA-gene interaction networks in pan-cancer using miRDriver

Banabithi Bose, Matthew Moravec, and Serdar Bozdog

## Supplemental Figure S21

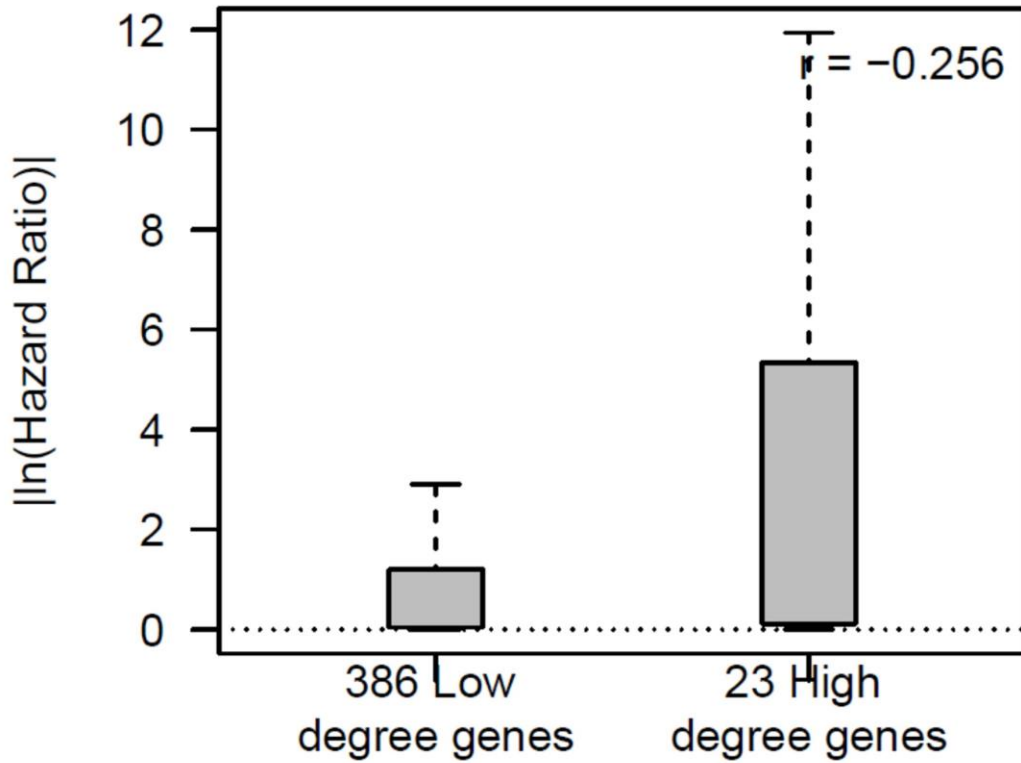

Boxplots of absolute values of natural logarithm of hazard ratios in high-degree and low-degree genes with  $r$  value of Mann-Whitney test.

# Supplemental Figure S21

**ACC OS**

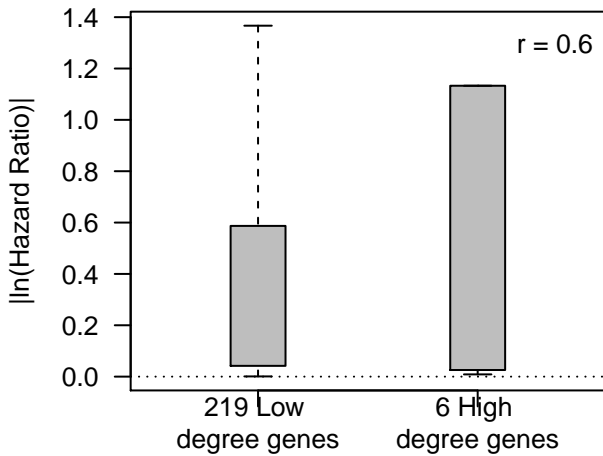

**ACC PFI**

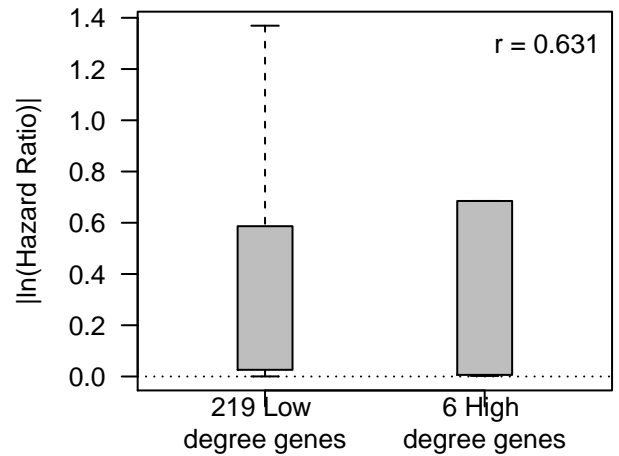

**ACC DSS**

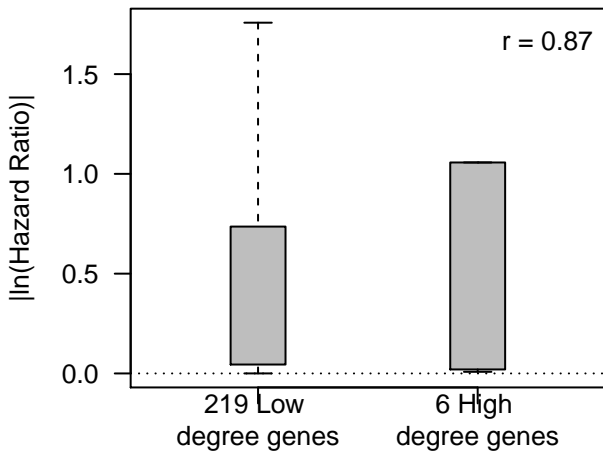

**ACC DFI**

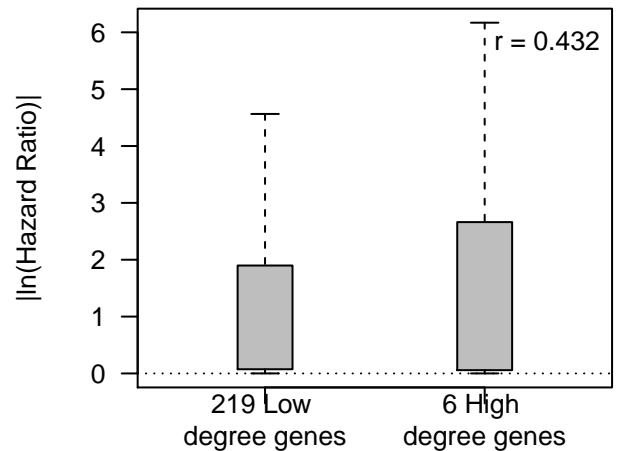

**LUAD OS**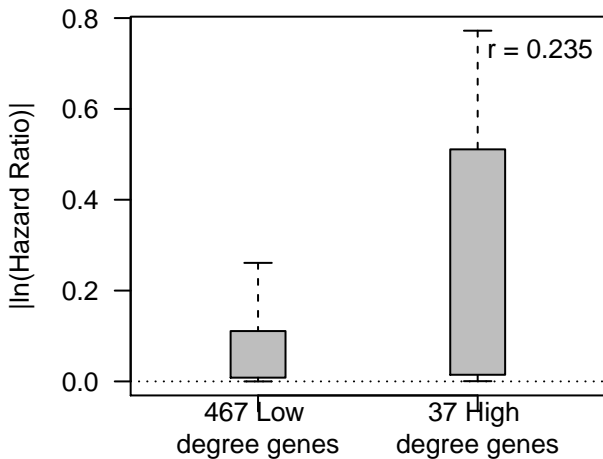**LUAD PFI**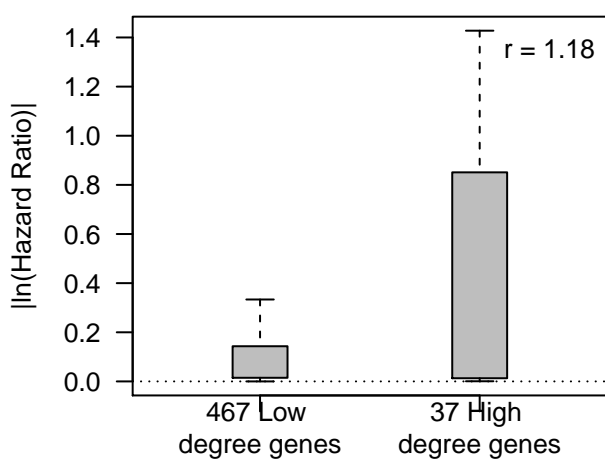**LUAD DSS**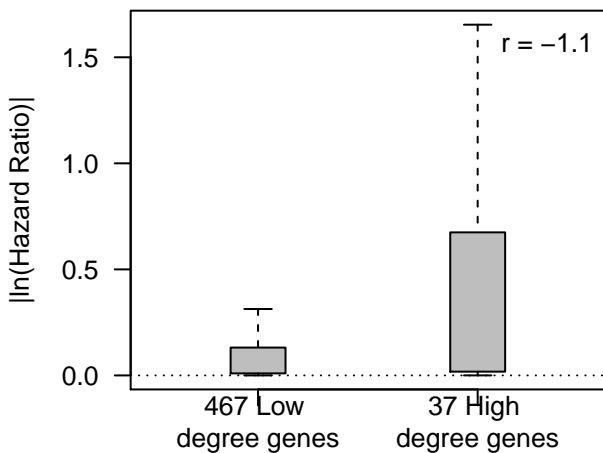**LUAD DFI**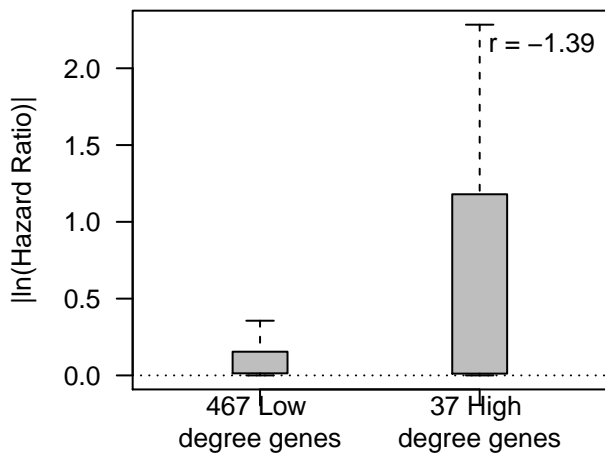

LUSC OS

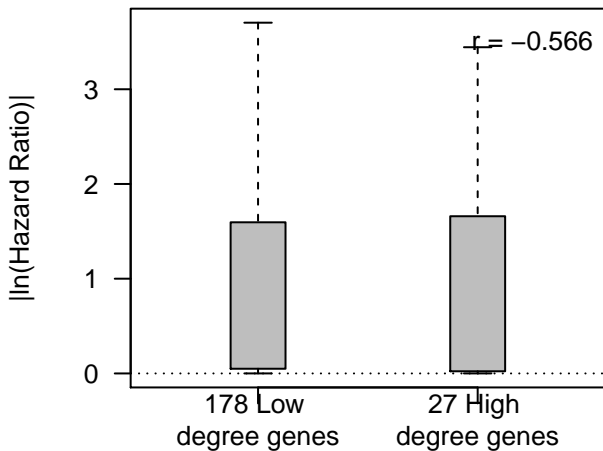

LUSC PFI

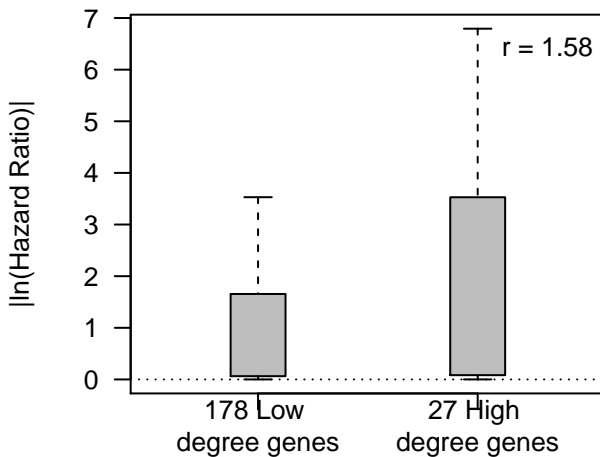

LUSC DSS

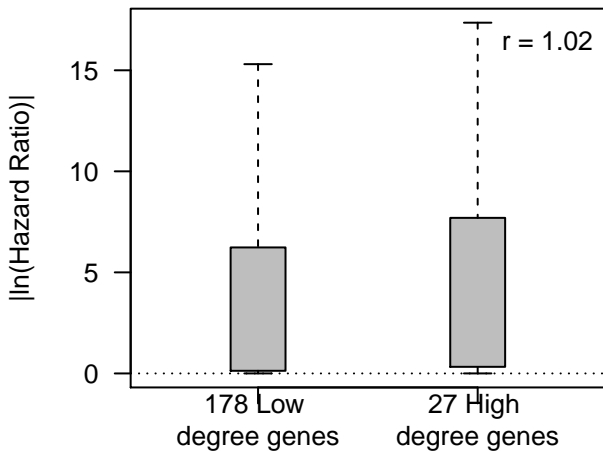

LUSC DFI

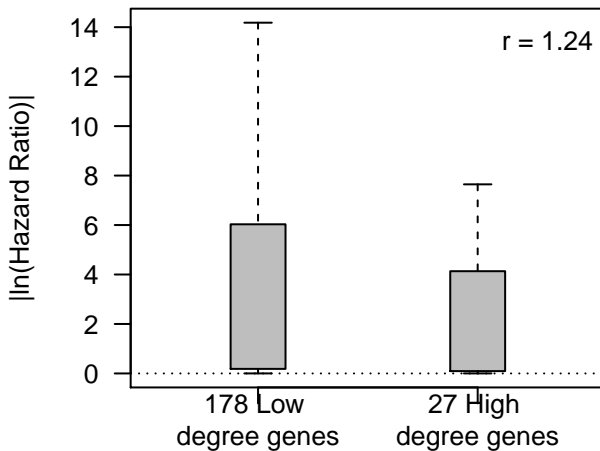

Supplement: MOESM30 [file 41598_2022_7628_MOESM30_ESM.pdf]
