# Supplementary material for: New Thinking on Read-Aloud.
Source: Springer Nature journal article supplement (doi:10.1038/s41598-022-07628-z), 2001-01-01

# Computing microRNA-gene interaction networks in pan-cancer using miRDriver

Banabithi Bose, Matthew Moravec, and Serdar Bozdog

## Supplemental Figure S22

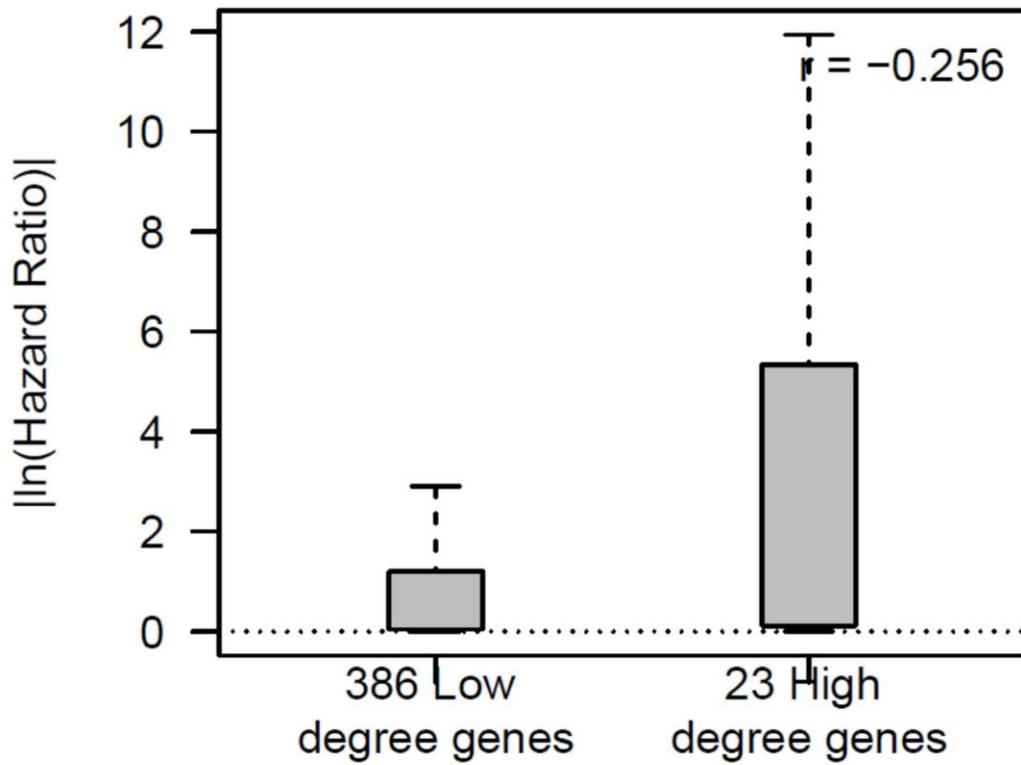

Boxplots of absolute values of natural logarithm of hazard ratios in high-degree and low-degree genes with  $r$  value of Mann-Whitney test.

Supplemental Figure S22

DLBC OS

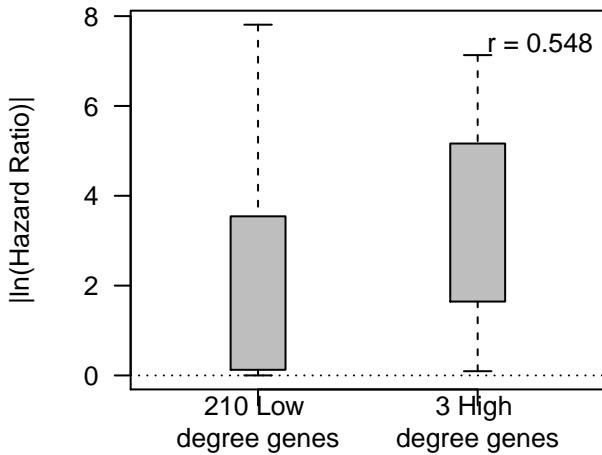

DLBC PFI

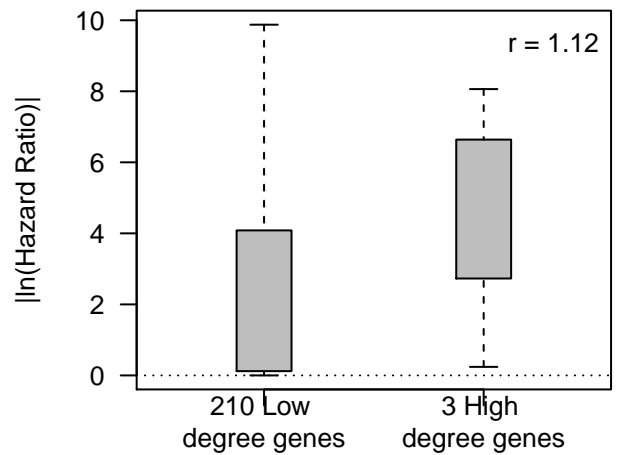

DLBC DSS

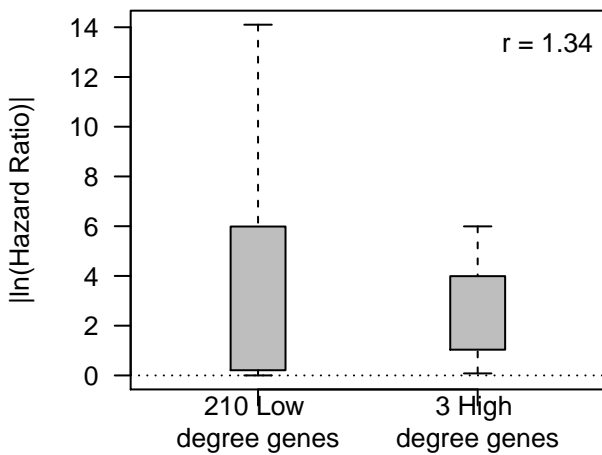

DLBC DFI

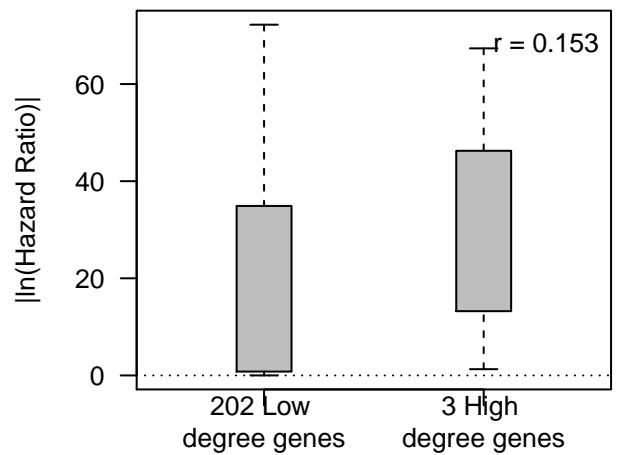

**KIRC OS**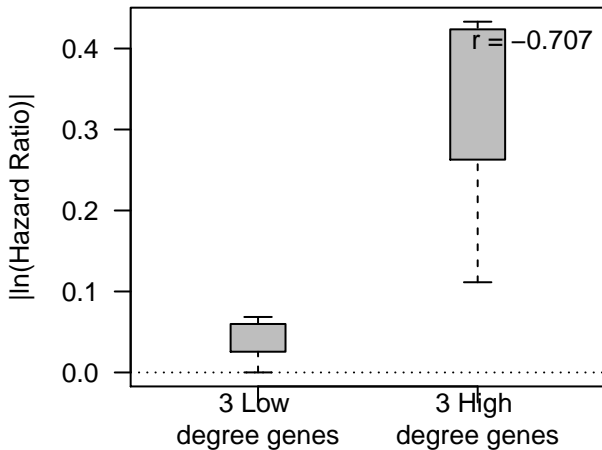**KIRC PFI**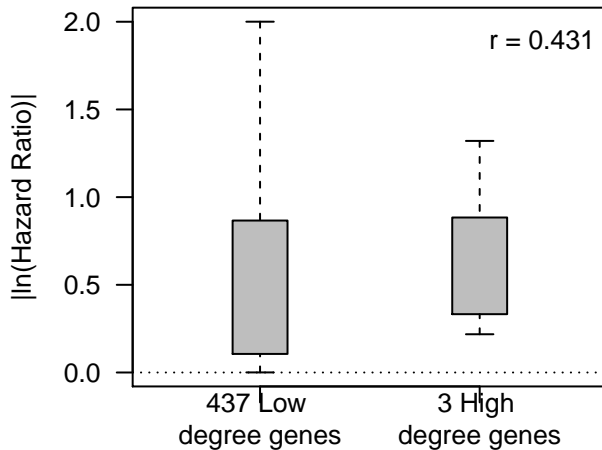**KIRC DSS**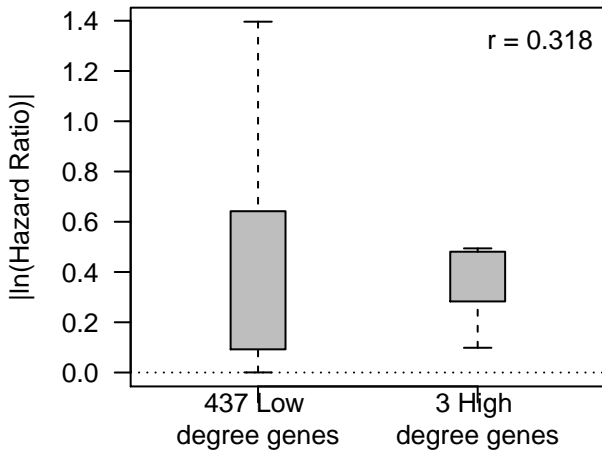**KIRC DFI**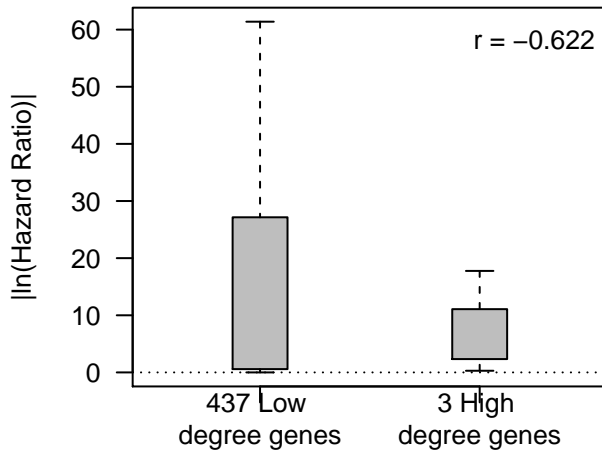

**LGG OS**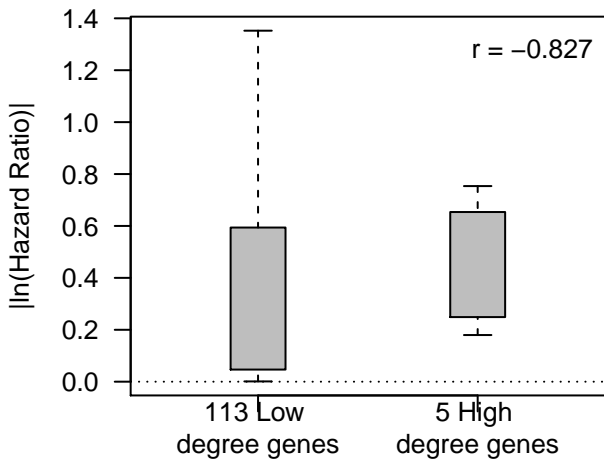**LGG PFI**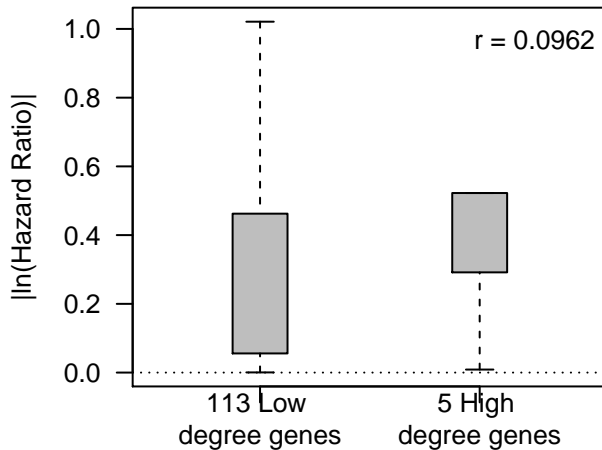**LGG DSS**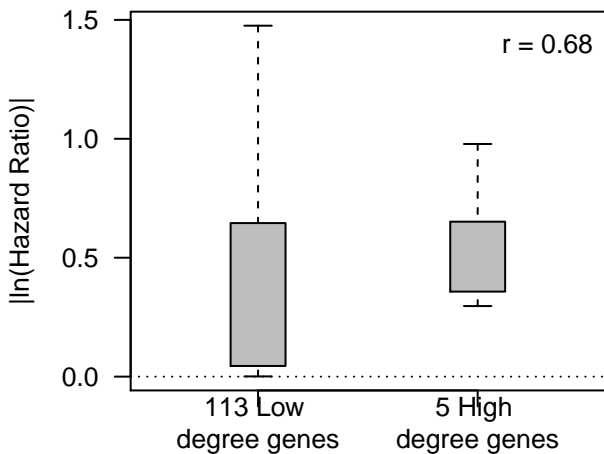**LGG DFI**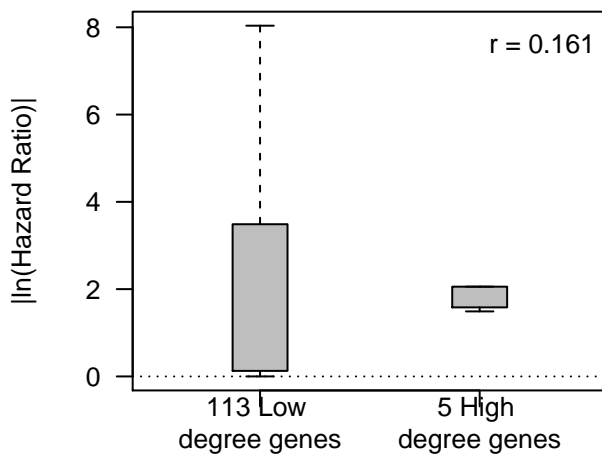

Supplement: MOESM31 [file 41598_2022_7628_MOESM31_ESM.pdf]
