# Supplementary material for: New Thinking on Read-Aloud.
Source: Springer Nature journal article supplement (doi:10.1038/s41598-022-07628-z), 2001-01-01

# Computing microRNA-gene interaction networks in pan-cancer using miRDriver

Banabithi Bose, Matthew Moravec, and Serdar Bozdog

## Supplemental Figure S23

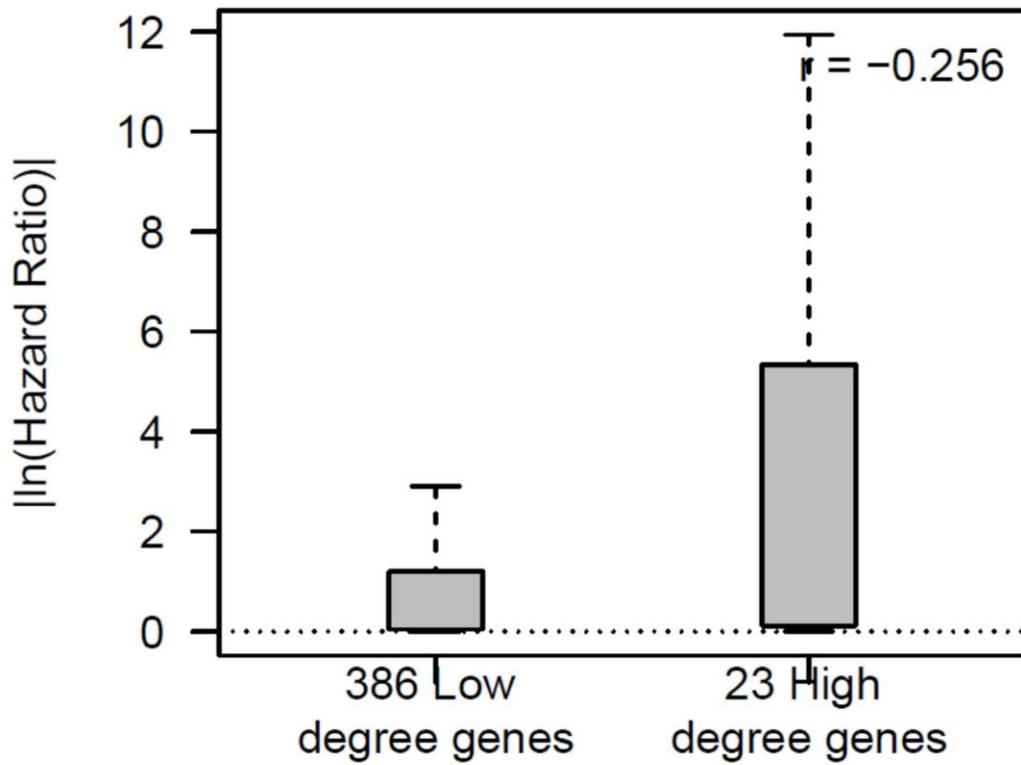

Boxplots of absolute values of natural logarithm of hazard ratios in high-degree and low-degree genes with  $r$  value of Mann–Whitney test.

## Supplemental Figure S23

CESC OS

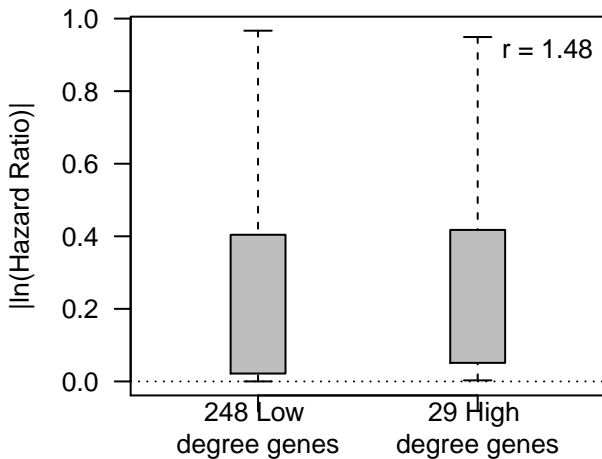

CESC PFI

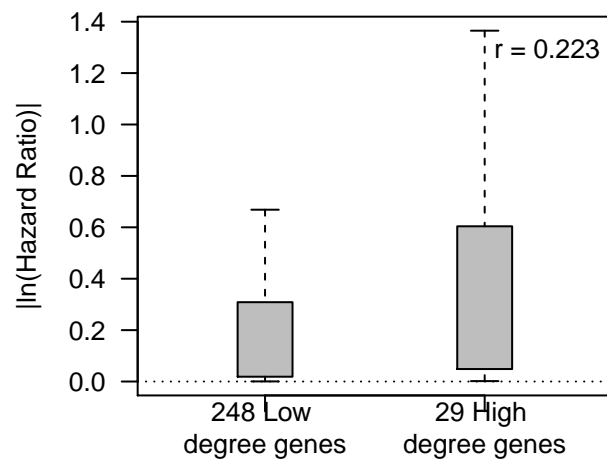

CESC DSS

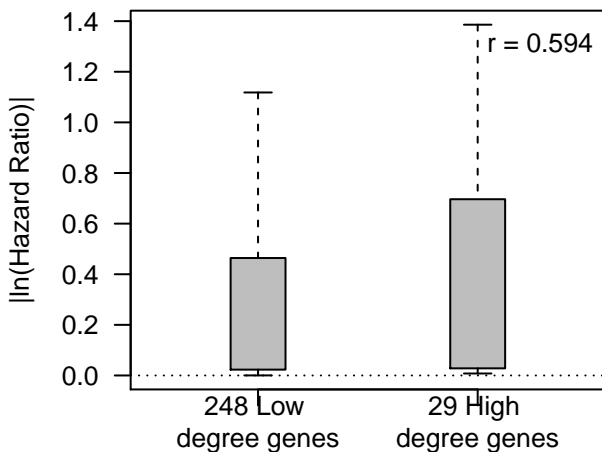

CESC DFI

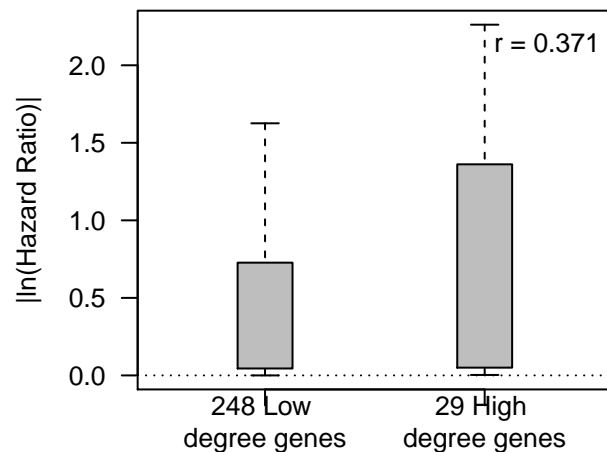

**UCEC OS**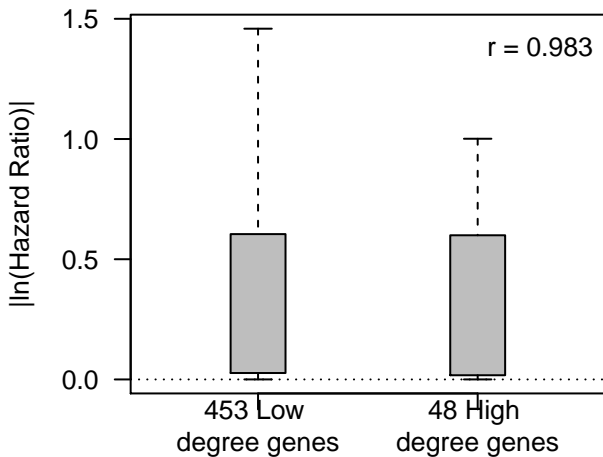**UCEC PFI**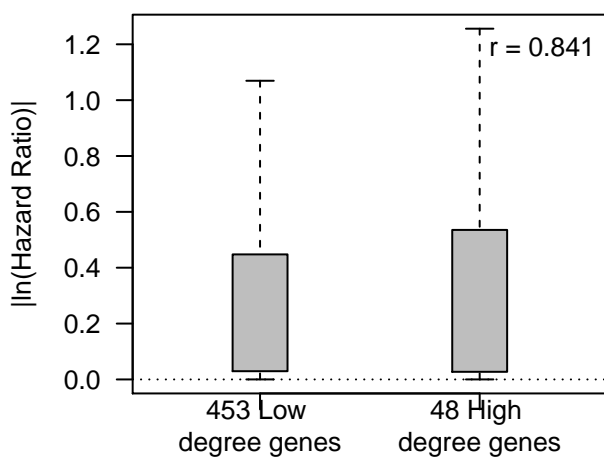**UCEC DSS**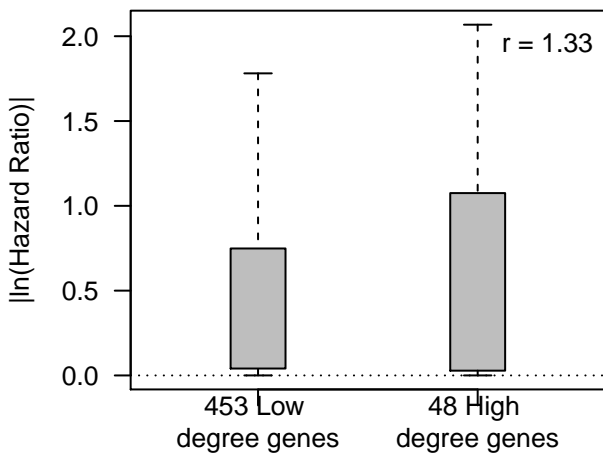**UCEC DFI**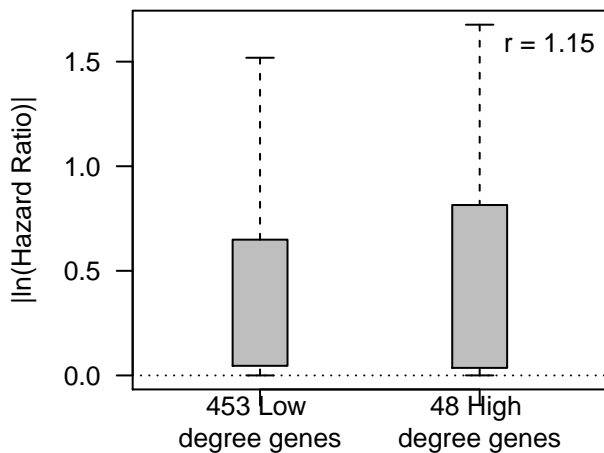

Supplement: MOESM32 [file 41598_2022_7628_MOESM32_ESM.pdf]
