# Supplementary material for: New Thinking on Read-Aloud.
Source: Springer Nature journal article supplement (doi:10.1038/s41598-022-07628-z), 2001-01-01
Supplement: MOESM33 [file 41598_2022_7628_MOESM33_ESM.pdf]

# Computing microRNA-gene interaction networks in pan-cancer using miRDriver

Banabithi Bose, Matthew Moravec, and Serdar Bozdog

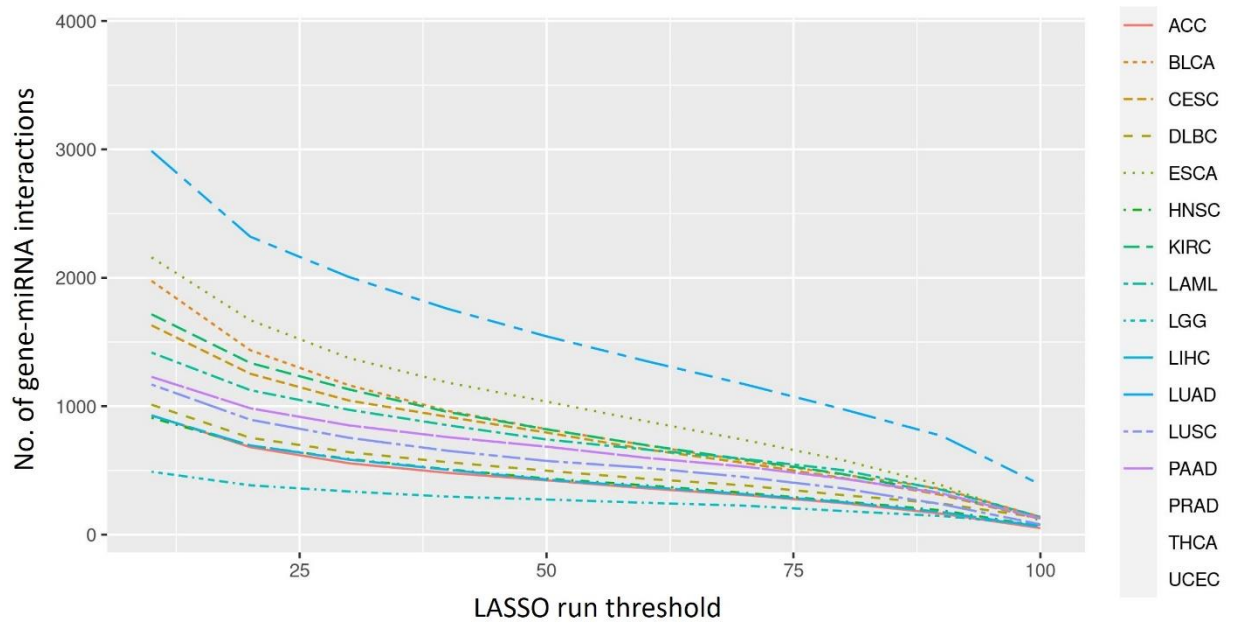

Supplemental Figure S24: Plots of the number computed miRNA-gene interactions with different LASSO runs for computing the miRNA regulators with non-zero coefficients.
