# Supplementary material for: Computing microRNA-gene interaction networks in pan-cancer using miRDriver
Source: Sci Rep. 2022 Mar 8;12:3717. doi: 10.1038/s41598-022-07628-z (PMC8904490; doi:10.1038/s41598-022-07628-z)
Supplement: Supplementary file 1 — Supplementary Information 1. [file 41598_2022_7628_MOESM1_ESM.xlsx]

## Sheet: Sheet1
Computing microRNA-gene interaction networks in pan-cancer using miRDriver Banabithi Bose, Matthew Moravec, and Serdar Bozdag
Supplemental Table S1
Hypergeometric test with the selected targets for each miRNA in ground truth data of known targets.
	Description of columns
	miRNA: No. of. Computed miRNAs
	universe: No. of. Input Genes in LASSO
	computed: No. of. Computed Targets
	known: No. of. Known Targets in ground truth
	overlap: No. of. Overlap between Known Targets and Computed Targets
	pvalue: Hypergeometric p-value

## Sheet: ACC.xlsx
	ACC
miRNA	universe	computed	known	overlap	pvalue
hsa-mir-1538	4248	72	1	0	1
hsa-mir-1305	4248	2	5	0	1
hsa-mir-185	4248	2	123	0	1
hsa-mir-1306	4248	1	49	0	1
hsa-mir-4786	4248	21	9	0	1
hsa-mir-149	4248	15	152	2	0.0985264683913708
hsa-mir-34b	4248	4	42	0	1
hsa-mir-34c	4248	1	139	0	1
hsa-mir-148b	4248	5	176	1	0.190769791958822
hsa-mir-1228	4248	15	9	0	1
hsa-mir-6758	4248	13	14	0	1
hsa-mir-616	4248	21	18	1	0.0855048832941032
hsa-mir-26a-2	4248	10	3	0	1
hsa-mir-6502	4248	14	6	0	1
hsa-mir-5010	4248	7	8	0	1
hsa-mir-6781	4248	3	8	0	1
hsa-mir-6782	4248	1	5	0	1
hsa-mir-6783	4248	2	9	0	1
hsa-mir-6784	4248	5	0	0	1
hsa-mir-580	4248	2	6	0	1
hsa-mir-6880	4248	19	13	1	0.0566879018738661
hsa-mir-6723	4248	2	1	0	1
hsa-mir-200b	4248	3	95	0	1
hsa-mir-200a	4248	1	75	0	1
hsa-mir-429	4248	1	94	0	1
hsa-mir-6726	4248	1	2	0	1
hsa-mir-6808	4248	1	13	0	1
hsa-mir-34a	4248	5	136	0	1
hsa-mir-4632	4248	2	1	0	1

## Sheet: BLCA.xlsx
	BLCA
miRNA	universe	computed	known	overlap	pvalue
hsa-mir-30e	5347	4	109	0	1
hsa-mir-30c-1	5347	2	7	0	1
hsa-mir-943	5347	10	0	0	1
hsa-mir-4647	5347	8	1	0	1
hsa-mir-3920	5347	7	0	0	1
hsa-mir-4728	5347	1	10	0	1
hsa-mir-6510	5347	5	2	0	1
hsa-mir-3064	5347	3	23	0	1
hsa-mir-4524a	5347	2	5	0	1
hsa-mir-3193	5347	1	1	0	1
hsa-mir-4755	5347	1	5	0	1
hsa-mir-6731	5347	7	9	0	1
hsa-mir-3917	5347	5	1	0	1
hsa-mir-1976	5347	12	8	0	1
hsa-mir-876	5347	11	68	0	1
hsa-mir-873	5347	5	68	2	0.00155483596684106
hsa-mir-885	5347	7	2	0	1
hsa-mir-4791	5347	4	0	0	1
hsa-mir-486	5347	19	26	2	0.00369554590437241
hsa-mir-5699	5347	2	6	0	1
hsa-mir-7113	5347	2	8	0	1
hsa-mir-4691	5347	3	9	0	1
hsa-mir-548k	5347	6	2	0	1
hsa-mir-3664	5347	3	5	0	1
hsa-mir-6754	5347	1	4	0	1
hsa-mir-139	5347	4	52	0	1
hsa-mir-708	5347	9	47	0	1
hsa-mir-5579	5347	9	2	0	1
hsa-mir-6502	5347	5	4	0	1
hsa-mir-3613	5347	15	8	1	0.0222377870749596
hsa-mir-16-1	5347	21	1	0	1
hsa-mir-15a	5347	9	98	1	0.15346903647361
hsa-mir-185	5347	1	38	1	0.00710678885356264
hsa-mir-3618	5347	1	0	0	1
hsa-mir-1306	5347	2	18	0	1
hsa-mir-301b	5347	3	35	0	1
hsa-mir-5571	5347	2	1	0	1
hsa-mir-3653	5347	8	23	0	1
hsa-mir-6818	5347	10	13	0	1
hsa-mir-3200	5347	10	1	0	1
hsa-mir-5703	5347	4	1	0	1
hsa-mir-4443	5347	2	0	0	1
hsa-mir-2115	5347	1	0	0	1
hsa-mir-3136	5347	2	0	0	1
hsa-mir-1284	5347	1	0	0	1
hsa-mir-3140	5347	1	2	0	1
hsa-mir-1305	5347	1	0	0	1
hsa-mir-581	5347	2	0	0	1
hsa-mir-449a	5347	1	19	0	1
hsa-mir-449b	5347	1	12	0	1
hsa-mir-218-2	5347	1	1	0	1
hsa-mir-5003	5347	1	5	0	1
hsa-mir-1229	5347	2	4	0	1
hsa-mir-4660	5347	1	1	0	1
hsa-mir-597	5347	3	0	0	1
hsa-mir-491	5347	2	58	0	1
hsa-mir-31	5347	2	51	0	1
hsa-mir-210	5347	1	5	0	1
hsa-mir-675	5347	1	0	0	1
hsa-mir-4491	5347	2	0	0	1
hsa-mir-34b	5347	1	6	0	1
hsa-mir-125b-1	5347	3	0	0	1
hsa-let-7a-2	5347	1	0	0	1
hsa-mir-100	5347	2	6	0	1
hsa-mir-1247	5347	5	5	0	1
hsa-mir-203b	5347	3	1	0	1
hsa-mir-3942	5347	1	0	0	1
hsa-mir-627	5347	4	3	0	1
hsa-mir-4745	5347	4	0	0	1
hsa-mir-3187	5347	2	7	0	1
hsa-mir-1227	5347	3	1	0	1
hsa-mir-4746	5347	2	1	0	1
hsa-mir-6885	5347	3	0	0	1
hsa-mir-3940	5347	3	1	0	1
hsa-mir-3662	5347	29	6	0	1
hsa-mir-6503	5347	8	1	0	1
hsa-mir-935	5347	5	0	0	1
hsa-mir-6803	5347	1	1	0	1
hsa-mir-6805	5347	12	1	0	1
hsa-mir-744	5347	2	9	0	1
hsa-mir-1269b	5347	2	0	0	1
hsa-mir-4766	5347	1	6	0	1
hsa-mir-33a	5347	2	39	0	1
hsa-mir-378i	5347	2	12	0	1
hsa-mir-1249	5347	1	1	0	1
hsa-mir-4762	5347	2	2	0	1
hsa-let-7b	5347	1	35	0	1
hsa-mir-3667	5347	1	5	0	1
hsa-mir-4645	5347	1	3	0	1
hsa-mir-5683	5347	1	0	0	1
hsa-mir-3150b	5347	11	2	0	1
hsa-mir-7705	5347	1	0	0	1
hsa-mir-5680	5347	3	5	0	1
hsa-mir-3610	5347	1	0	0	1
hsa-mir-6844	5347	3	1	0	1
hsa-mir-4662a	5347	5	1	0	1
hsa-mir-4522	5347	3	2	0	1
hsa-mir-451a	5347	4	8	0	1
hsa-mir-144	5347	77	80	1	0.689367756218414
hsa-mir-4732	5347	3	0	0	1
hsa-mir-4523	5347	5	0	0	1
hsa-mir-423	5347	4	20	0	1
hsa-mir-4733	5347	4	4	0	1
hsa-mir-4724	5347	3	0	0	1
hsa-mir-193a	5347	3	57	0	1
hsa-mir-365b	5347	5	19	0	1
hsa-mir-632	5347	4	0	0	1
hsa-mir-3176	5347	2	2	0	1
hsa-mir-3177	5347	2	0	0	1
hsa-mir-3677	5347	1	0	0	1
hsa-mir-940	5347	2	2	0	1
hsa-mir-5698	5347	1	1	0	1
hsa-mir-92b	5347	1	3	0	1

## Sheet: BRCA.xlsx
	BRCA
miRNA	universe	computed	known	overlap	pvalue
hsa.let.7a.2	6484	1	0	0	1
hsa.let.7b	6484	6	34	1	0.0310643131270013
hsa.let.7c	6484	1	15	0	1
hsa.let.7g	6484	1	6	1	0.000925354719309102
hsa.mir.100	6484	1	0	0	1
hsa.mir.10a	6484	3	19	1	0.00876648338813413
hsa.mir.1224	6484	24	28	2	0.00468045352664558
hsa.mir.1226	6484	1	0	0	1
hsa.mir.1247	6484	3	0	0	1
hsa.mir.125b.1	6484	1	0	0	1
hsa.mir.125b.2	6484	3	0	0	1
hsa.mir.1266	6484	1	0	0	1
hsa.mir.127	6484	1	1	0	1
hsa.mir.1287	6484	1	0	0	1
hsa.mir.1291	6484	114	0	0	1
hsa.mir.1304	6484	2	0	0	1
hsa.mir.1343	6484	29	0	0	1
hsa.mir.138.1	6484	2	0	0	1
hsa.mir.139	6484	6	16	1	0.0147202804217758
hsa.mir.142	6484	10	29	1	0.0438658064476369
hsa.mir.146b	6484	1	2	0	1
hsa.mir.147b	6484	2	0	0	1
hsa.mir.151a	6484	4	3	0	1
hsa.mir.151b	6484	5	0	0	1
hsa.mir.152	6484	3	25	0	1
hsa.mir.15a	6484	1	7	1	0.00107958050586054
hsa.mir.16.1	6484	1	0	0	1
hsa.mir.191	6484	1	2	1	0.000308451573103108
hsa.mir.1910	6484	12	0	0	1
hsa.mir.192	6484	3	5	0	1
hsa.mir.203b	6484	2	0	0	1
hsa.mir.21	6484	7	22	1	0.0235211511278175
hsa.mir.210	6484	10	1	0	1
hsa.mir.2115	6484	3	0	0	1
hsa.mir.296	6484	1	8	1	0.00123380629241199
hsa.mir.299	6484	1	6	1	0.000925354719309102
hsa.mir.301a	6484	2	30	0	1
hsa.mir.3064	6484	2	15	0	1
hsa.mir.3065	6484	3	0	0	1
hsa.mir.30a	6484	2	4	0	1
hsa.mir.30b	6484	6	36	2	0.000443363987932552
hsa.mir.30d	6484	4	36	1	0.0220292945406828
hsa.mir.31	6484	19	33	3	0.000110122393020163
hsa.mir.3136	6484	6	0	0	1
hsa.mir.3150a	6484	2	0	0	1
hsa.mir.3150b	6484	9	0	0	1
hsa.mir.3173	6484	2	0	0	1
hsa.mir.3187	6484	3	0	0	1
hsa.mir.3190	6484	27	0	0	1
hsa.mir.3191	6484	45	0	0	1
hsa.mir.320a	6484	1	3	1	0.000462677359654551
hsa.mir.320e	6484	24	0	0	1
hsa.mir.326	6484	4	12	2	1.88023600841663e-05
hsa.mir.330	6484	42	73	6	6.29568850069511e-06
hsa.mir.337	6484	3	0	0	1
hsa.mir.338	6484	6	29	1	0.0265471380558903
hsa.mir.339	6484	75	27	2	0.0384582410749401
hsa.mir.342	6484	4	5	1	0.00308166190031556
hsa.mir.345	6484	4	3	1	0.00184985311326213
hsa.mir.34b	6484	1	1	0	1
hsa.mir.34c	6484	1	2	1	0.000308451573103108
hsa.mir.3610	6484	6	0	0	1
hsa.mir.3614	6484	4	0	0	1
hsa.mir.3615	6484	4	0	0	1
hsa.mir.3619	6484	3	19	1	0.00876648338813413
hsa.mir.3622a	6484	1	0	0	1
hsa.mir.3648	6484	2	0	0	1
hsa.mir.3664	6484	6	0	0	1
hsa.mir.3667	6484	11	0	0	1
hsa.mir.3678	6484	3	0	0	1
hsa.mir.3687	6484	1	0	0	1
hsa.mir.3691	6484	3	0	0	1
hsa.mir.376a.2	6484	1	0	0	1
hsa.mir.376c	6484	1	5	0	1
hsa.mir.378c	6484	1	1	0	1
hsa.mir.379	6484	3	3	0	1
hsa.mir.381	6484	3	8	1	0.00369742351433111
hsa.mir.382	6484	1	7	0	1
hsa.mir.383	6484	1	3	1	0.000462677359654551
hsa.mir.3940	6484	2	0	0	1
hsa.mir.3942	6484	1	0	0	1
hsa.mir.411	6484	1	3	0	1
hsa.mir.412	6484	1	0	0	1
hsa.mir.425	6484	2	7	0	1
hsa.mir.431	6484	2	4	1	0.00123352082126582
hsa.mir.432	6484	1	6	1	0.000925354719309102
hsa.mir.4326	6484	1	0	0	1
hsa.mir.4443	6484	2	0	0	1
hsa.mir.4453	6484	4	0	0	1
hsa.mir.4454	6484	2	0	0	1
hsa.mir.4466	6484	1	0	0	1
hsa.mir.4491	6484	3	0	0	1
hsa.mir.4492	6484	1	0	0	1
hsa.mir.449a	6484	26	133	1	0.417199794193933
hsa.mir.449b	6484	24	93	5	1.86668305976467e-05
hsa.mir.4510	6484	2	0	0	1
hsa.mir.4522	6484	7	0	0	1
hsa.mir.4532	6484	1	0	0	1
hsa.mir.454	6484	4	30	0	1
hsa.mir.4645	6484	2	0	0	1
hsa.mir.4661	6484	6	0	0	1
hsa.mir.4662a	6484	3	0	0	1
hsa.mir.4664	6484	4	0	0	1
hsa.mir.4709	6484	2	0	0	1
hsa.mir.4714	6484	4	0	0	1
hsa.mir.4726	6484	1	0	0	1
hsa.mir.4728	6484	8	0	0	1
hsa.mir.4745	6484	1	0	0	1
hsa.mir.4746	6484	13	0	0	1
hsa.mir.4758	6484	3	0	0	1
hsa.mir.4762	6484	7	0	0	1
hsa.mir.4763	6484	5	0	0	1
hsa.mir.4787	6484	5	0	0	1
hsa.mir.485	6484	1	8	1	0.00123380629241199
hsa.mir.487b	6484	1	0	0	1
hsa.mir.493	6484	1	7	1	0.00107958050586054
hsa.mir.494	6484	1	6	1	0.000925354719309102
hsa.mir.495	6484	1	9	1	0.00138803207896365
hsa.mir.496	6484	1	6	0	1
hsa.mir.5010	6484	1	0	0	1
hsa.mir.522	6484	2	0	0	1
hsa.mir.526b	6484	1	3	0	1
hsa.mir.543	6484	1	6	1	0.000925354719309102
hsa.mir.548k	6484	7	0	0	1
hsa.mir.548t	6484	1	0	0	1
hsa.mir.548v	6484	1	0	0	1
hsa.mir.5579	6484	4	0	0	1
hsa.mir.5680	6484	2	0	0	1
hsa.mir.5683	6484	2	0	0	1
hsa.mir.5687	6484	60	0	0	1
hsa.mir.5691	6484	2	0	0	1
hsa.mir.5694	6484	5	0	0	1
hsa.mir.5708	6484	4	0	0	1
hsa.mir.581	6484	85	0	0	1
hsa.mir.582	6484	162	59	8	9.58196046722388e-05
hsa.mir.598	6484	1	0	0	1
hsa.mir.625	6484	2	0	0	1
hsa.mir.627	6484	1	0	0	1
hsa.mir.628	6484	1	0	0	1
hsa.mir.636	6484	3	0	0	1
hsa.mir.642a	6484	52	0	0	1
hsa.mir.6502	6484	2	0	0	1
hsa.mir.6510	6484	7	0	0	1
hsa.mir.6514	6484	5	0	0	1
hsa.mir.6516	6484	4	0	0	1
hsa.mir.654	6484	1	0	0	1
hsa.mir.656	6484	2	0	0	1
hsa.mir.671	6484	5	0	0	1
hsa.mir.6715a	6484	1	0	0	1
hsa.mir.6716	6484	1	0	0	1
hsa.mir.6720	6484	5	0	0	1
hsa.mir.6747	6484	1	0	0	1
hsa.mir.6748	6484	5	0	0	1
hsa.mir.675	6484	3	0	0	1
hsa.mir.6761	6484	11	0	0	1
hsa.mir.6762	6484	3	0	0	1
hsa.mir.6764	6484	1	0	0	1
hsa.mir.6781	6484	2	0	0	1
hsa.mir.6783	6484	4	0	0	1
hsa.mir.6803	6484	1	0	0	1
hsa.mir.6842	6484	1	0	0	1
hsa.mir.6843	6484	1	0	0	1
hsa.mir.6844	6484	3	0	0	1
hsa.mir.6860	6484	8	0	0	1
hsa.mir.6868	6484	1	0	0	1
hsa.mir.6879	6484	4	0	0	1
hsa.mir.708	6484	3	6	1	0.00277392356473949
hsa.mir.7155	6484	2	0	0	1
hsa.mir.744	6484	41	5	1	0.0312284828337227
hsa.mir.758	6484	1	5	1	0.000771128932757659
hsa.mir.769	6484	52	0	0	1
hsa.mir.7705	6484	4	0	0	1
hsa.mir.7854	6484	11	0	0	1
hsa.mir.8072	6484	4	0	0	1
hsa.mir.937	6484	5	0	0	1
hsa.mir.99a	6484	1	1	0	1

## Sheet: CESC.xlsx
	CESC
miRNA	universe	computed	known	overlap	pvalue
hsa-mir-2355	4472	15	4	0	1
hsa-mir-7845	4472	4	3	0	1
hsa-mir-4775	4472	10	4	0	1
hsa-mir-6513	4472	4	9	0	1
hsa-mir-6810	4472	15	10	1	0.0330730532373545
hsa-mir-26b	4472	17	150	4	0.00205744853802847
hsa-mir-375	4472	23	89	0	1
hsa-mir-5703	4472	16	2	1	0.00714363164884102
hsa-mir-4777	4472	15	1	0	1
hsa-mir-5001	4472	20	5	0	1
hsa-mir-4786	4472	4	6	0	1
hsa-mir-149	4472	21	109	3	0.0136092013606996
hsa-mir-4665	4472	8	3	0	1
hsa-mir-1343	4472	32	13	0	1
hsa-mir-6510	4472	47	3	0	1
hsa-mir-5684	4472	14	0	0	1
hsa-mir-6802	4472	2	3	0	1
hsa-mir-3193	4472	3	1	0	1
hsa-mir-499a	4472	21	44	2	0.0176472977868491
hsa-mir-137	4472	2	59	0	1
hsa-mir-197	4472	1	24	0	1
hsa-mir-942	4472	2	5	0	1
hsa-mir-877	4472	7	18	0	1
hsa-mir-3920	4472	3	2	0	1
hsa-mir-4491	4472	10	1	0	1
hsa-mir-34b	4472	5	28	1	0.0309299890034499
hsa-mir-34c	4472	2	105	0	1
hsa-mir-6716	4472	4	2	0	1
hsa-mir-4492	4472	3	1	0	1
hsa-mir-125b-1	4472	8	0	0	1
hsa-let-7a-2	4472	6	0	0	1
hsa-mir-100	4472	10	18	0	1
hsa-mir-548k	4472	4	3	0	1
hsa-mir-3664	4472	6	10	0	1
hsa-mir-3136	4472	1	1	0	1
hsa-mir-138-2	4472	10	1	1	0.00223613595706618
hsa-mir-3667	4472	7	7	0	1
hsa-mir-6821	4472	4	10	0	1
hsa-mir-10b	4472	19	72	1	0.265834031177997
hsa-mir-7704	4472	4	2	0	1
hsa-mir-1246	4472	17	0	0	1
hsa-mir-1179	4472	2	1	0	1
hsa-mir-7-2	4472	3	0	0	1
hsa-mir-3174	4472	8	0	0	1
hsa-mir-4714	4472	3	4	0	1
hsa-mir-30b	4472	1	55	0	1
hsa-mir-30d	4472	1	48	0	1
hsa-mir-4664	4472	1	0	0	1
hsa-mir-937	4472	1	1	0	1
hsa-mir-6726	4472	1	0	0	1
hsa-mir-6808	4472	2	0	0	1
hsa-mir-551a	4472	1	0	0	1
hsa-mir-6730	4472	2	0	0	1
hsa-mir-4466	4472	1	0	0	1
hsa-mir-346	4472	1	32	0	1
hsa-mir-136	4472	1	15	0	1
hsa-mir-381	4472	1	19	0	1
hsa-mir-3615	4472	2	1	0	1
hsa-mir-3678	4472	3	0	0	1
hsa-mir-4738	4472	2	3	0	1
hsa-mir-6868	4472	4	8	0	1
hsa-mir-636	4472	2	2	0	1
hsa-mir-6516	4472	2	12	0	1
hsa-mir-1268b	4472	3	2	0	1
hsa-mir-3065	4472	3	1	0	1
hsa-mir-4525	4472	4	2	0	1
hsa-mir-6737	4472	1	0	0	1
hsa-mir-92b	4472	1	4	0	1
hsa-mir-15b	4472	1	24	0	1
hsa-mir-551b	4472	2	4	0	1
hsa-mir-1224	4472	1	8	0	1
hsa-mir-1248	4472	2	0	0	1
hsa-mir-624	4472	6	7	0	1
hsa-mir-3064	4472	1	22	0	1
hsa-mir-147b	4472	3	0	0	1
hsa-mir-4713	4472	1	4	0	1
hsa-mir-628	4472	2	2	0	1

## Sheet: DLBC.xlsx
	DLBC
miRNA	universe	computed	known	overlap	pvalue
hsa-mir-346	3644	42	16	4	2.51161814752055e-05
hsa-mir-627	3644	5	6	0	1
hsa-mir-147b	3644	2	1	0	1
hsa-mir-570	3644	11	8	0	1
hsa-mir-4797	3644	2	6	0	1
hsa-mir-6723	3644	23	1	0	1
hsa-mir-200b	3644	53	142	9	0.000164738251749461
hsa-mir-200a	3644	32	119	6	0.000482948405906286
hsa-mir-429	3644	36	142	5	0.0119123476397096
hsa-mir-6726	3644	9	4	0	1
hsa-mir-6727	3644	7	18	0	1
hsa-mir-6808	3644	9	12	0	1
hsa-mir-551a	3644	26	12	1	0.0824585678529459
hsa-mir-6844	3644	13	2	1	0.00712326513443362
hsa-mir-4662a	3644	20	7	0	1
hsa-mir-6802	3644	3	1	0	1
hsa-mir-6803	3644	7	1	0	1
hsa-mir-6805	3644	11	4	0	1
hsa-mir-4784	3644	2	2	0	1
hsa-mir-128-1	3644	2	0	0	1
hsa-mir-6891	3644	5	3	0	1
hsa-mir-6833	3644	3	6	0	1
hsa-mir-4677	3644	4	6	0	1
hsa-mir-3916	3644	7	0	0	1
hsa-mir-1226	3644	16	2	0	1
hsa-mir-4443	3644	3	3	0	1
hsa-mir-2115	3644	5	7	0	1
hsa-mir-425	3644	11	41	0	1
hsa-mir-191	3644	9	22	0	1

## Sheet: ESCA.xlsx
	ESCA
miRNA	universe	computed	known	overlap	pvalue
hsa-mir-30e	4942	8	107	1	0.160742193855352
hsa-mir-30c-1	4942	6	9	0	1
hsa-mir-598	4942	4	0	0	1
hsa-mir-486	4942	3	22	0	1
hsa-mir-6502	4942	16	2	0	1
hsa-mir-5094	4942	15	0	0	1
hsa-mir-548t	4942	3	3	0	1
hsa-mir-1305	4942	3	2	0	1
hsa-mir-3648	4942	7	0	0	1
hsa-mir-3687	4942	3	0	0	1
hsa-let-7c	4942	3	55	0	1
hsa-mir-6501	4942	19	4	0	1
hsa-mir-2355	4942	3	1	0	1
hsa-mir-4775	4942	6	3	0	1
hsa-mir-6513	4942	10	7	0	1
hsa-mir-26b	4942	5	51	0	1
hsa-mir-375	4942	6	20	0	1
hsa-mir-3131	4942	5	0	0	1
hsa-mir-5703	4942	10	0	0	1
hsa-mir-4777	4942	7	0	0	1
hsa-mir-5001	4942	11	2	0	1
hsa-mir-4786	4942	4	1	0	1
hsa-mir-149	4942	4	30	0	1
hsa-mir-1343	4942	15	5	0	1
hsa-mir-4676	4942	17	24	0	1
hsa-mir-4680	4942	7	6	0	1
hsa-mir-3662	4942	18	5	0	1
hsa-mir-6720	4942	18	5	0	1
hsa-mir-4645	4942	10	0	0	1
hsa-mir-3691	4942	7	1	0	1
hsa-mir-5683	4942	8	0	0	1
hsa-mir-4491	4942	1	1	0	1
hsa-mir-34b	4942	1	4	0	1
hsa-mir-34c	4942	6	14	0	1
hsa-mir-6716	4942	1	0	0	1
hsa-let-7a-2	4942	1	0	0	1
hsa-mir-100	4942	9	2	0	1
hsa-mir-581	4942	41	2	0	1
hsa-mir-449a	4942	42	119	3	0.0793364233078917
hsa-mir-5687	4942	52	0	0	1
hsa-mir-582	4942	26	61	0	1
hsa-mir-339	4942	11	25	0	1
hsa-mir-3610	4942	2	0	0	1
hsa-mir-6844	4942	4	1	0	1
hsa-mir-4662a	4942	4	0	0	1
hsa-mir-30d	4942	2	25	0	1
hsa-mir-151a	4942	1	6	0	1
hsa-mir-4664	4942	1	0	0	1
hsa-mir-937	4942	1	0	0	1
hsa-mir-6852	4942	36	6	0	1
hsa-mir-4691	4942	8	3	0	1
hsa-mir-3664	4942	2	5	0	1
hsa-mir-139	4942	7	15	0	1
hsa-mir-6510	4942	2	0	0	1
hsa-mir-5010	4942	2	5	0	1
hsa-mir-6781	4942	1	0	0	1
hsa-mir-6516	4942	11	13	0	1
hsa-mir-6728	4942	1	2	0	1
hsa-mir-34a	4942	13	76	3	0.00089484210702905
hsa-mir-378f	4942	1	1	0	1
hsa-mir-3136	4942	3	3	0	1
hsa-mir-1284	4942	6	0	0	1
hsa-mir-4473	4942	2	0	0	1
hsa-mir-491	4942	7	30	1	0.041751741802404
hsa-mir-31	4942	3	23	0	1
hsa-mir-346	4942	14	30	0	1
hsa-mir-210	4942	6	30	0	1
hsa-mir-675	4942	10	1	0	1
hsa-mir-483	4942	8	12	1	0.0192745841448335
hsa-mir-3176	4942	7	3	0	1
hsa-mir-4529	4942	4	2	0	1
hsa-mir-942	4942	2	0	0	1
hsa-mir-3187	4942	2	1	0	1
hsa-mir-3940	4942	2	0	0	1
hsa-mir-4999	4942	2	0	0	1
hsa-mir-653	4942	1	11	0	1
hsa-mir-489	4942	1	9	0	1
hsa-mir-25	4942	1	22	0	1
hsa-mir-93	4942	2	25	0	1
hsa-mir-106b	4942	1	26	0	1
hsa-mir-4658	4942	3	0	0	1
hsa-mir-548o	4942	2	0	0	1
hsa-mir-5090	4942	2	2	0	1

## Sheet: HNSC.xlsx
	HNSC
miRNA	universe	computed	known	overlap	pvalue
hsa-mir-486	2529	1	6	0	1
hsa-mir-3667	2529	12	6	0	1
hsa-mir-3127	2529	9	1	0	1
hsa-mir-4714	2529	5	3	0	1
hsa-mir-4522	2529	6	0	0	1
hsa-mir-1343	2529	8	2	0	1
hsa-mir-6502	2529	2	0	0	1
hsa-mir-6510	2529	37	1	0	1
hsa-mir-6870	2529	4	1	0	1
hsa-mir-3193	2529	1	1	0	1
hsa-mir-185	2529	2	21	0	1
hsa-mir-1306	2529	1	13	0	1
hsa-mir-6720	2529	11	3	0	1
hsa-mir-5699	2529	5	2	0	1
hsa-mir-346	2529	8	11	1	0.034318026775106
hsa-mir-210	2529	6	9	0	1
hsa-mir-675	2529	3	1	0	1
hsa-mir-483	2529	1	2	0	1
hsa-mir-4525	2529	9	1	0	1
hsa-mir-10b	2529	5	12	0	1
hsa-mir-7704	2529	3	0	0	1
hsa-mir-6512	2529	7	1	0	1
hsa-mir-1258	2529	4	0	0	1
hsa-mir-561	2529	7	2	0	1
hsa-mir-3129	2529	6	13	0	1
hsa-mir-2355	2529	3	1	0	1
hsa-mir-7845	2529	3	0	0	1
hsa-mir-4775	2529	5	1	0	1
hsa-mir-6513	2529	8	3	0	1
hsa-mir-26b	2529	8	25	1	0.0765022119795193
hsa-mir-375	2529	9	16	0	1
hsa-mir-5703	2529	3	0	0	1
hsa-mir-4777	2529	2	1	0	1
hsa-mir-5001	2529	4	2	0	1
hsa-mir-4786	2529	4	1	0	1
hsa-mir-149	2529	3	12	0	1
hsa-mir-208b	2529	3	1	0	1
hsa-mir-342	2529	1	2	0	1
hsa-mir-345	2529	2	0	0	1
hsa-mir-379	2529	1	1	0	1
hsa-mir-411	2529	1	2	0	1
hsa-mir-654	2529	1	0	0	1
hsa-mir-655	2529	1	1	0	1
hsa-mir-382	2529	1	2	0	1
hsa-mir-134	2529	1	2	0	1
hsa-mir-323b	2529	1	2	0	1
hsa-mir-496	2529	1	2	0	1
hsa-mir-369	2529	1	2	0	1
hsa-mir-203b	2529	1	0	0	1
hsa-mir-339	2529	6	14	1	0.0327903954872707
hsa-mir-6718	2529	7	0	0	1
hsa-mir-6755	2529	3	0	0	1
hsa-mir-4745	2529	2	0	0	1
hsa-mir-3187	2529	1	4	0	1
hsa-mir-1227	2529	2	0	0	1
hsa-mir-4746	2529	1	0	0	1
hsa-mir-6885	2529	1	1	0	1
hsa-mir-4999	2529	1	0	0	1
hsa-mir-4473	2529	3	0	0	1
hsa-mir-873	2529	1	10	0	1
hsa-mir-3140	2529	1	2	0	1
hsa-mir-4453	2529	4	2	0	1
hsa-mir-548t	2529	1	2	0	1
hsa-mir-1305	2529	1	3	0	1
hsa-mir-6844	2529	1	0	0	1
hsa-mir-30d	2529	1	0	0	1
hsa-mir-151a	2529	1	0	0	1

## Sheet: LAML.xlsx
	LAML
miRNA	universe	computed	known	overlap	pvalue
hsa-mir-4724	2878	53	6	0	1
hsa-mir-193a	2878	89	114	5	0.275904532397438
hsa-mir-365b	2878	70	52	1	0.725287064699993
hsa-mir-632	2878	43	2	0	1
hsa-mir-3136	2878	56	5	0	1
hsa-mir-1284	2878	54	1	0	1
hsa-mir-129-1	2878	10	32	0	1
hsa-mir-182	2878	9	105	1	0.284638430061615
hsa-mir-96	2878	33	79	7	2.16009122817207e-05
hsa-mir-183	2878	24	54	3	0.00956545685999314
hsa-mir-335	2878	5	140	0	1
hsa-mir-29a	2878	11	85	0	1
hsa-mir-29b-1	2878	18	1	0	1
hsa-mir-3654	2878	3	1	0	1
hsa-mir-6509	2878	12	5	0	1
hsa-mir-6892	2878	6	10	0	1
hsa-mir-671	2878	7	0	0	1
hsa-mir-22	2878	22	103	3	0.0418303576164561
hsa-mir-132	2878	22	73	0	1
hsa-mir-212	2878	28	86	2	0.203165020783188

## Sheet: KIRC.xlsx
	KIRC
miRNA	universe	computed	known	overlap	pvalue
hsa-mir-4728	2998	122	15	3	0.0209041471708487
hsa-mir-31	2998	28	36	2	0.0435881552730447
hsa-mir-346	2998	35	29	1	0.289765970761575
hsa-mir-190b	2998	3	6	0	1
hsa-mir-92b	2998	6	5	0	1
hsa-mir-765	2998	3	0	0	1
hsa-mir-5187	2998	3	0	0	1
hsa-mir-2277	2998	7	2	0	1
hsa-mir-551b	2998	44	7	0	1
hsa-mir-215	2998	5	0	0	1
hsa-mir-664a	2998	5	0	0	1
hsa-mir-4742	2998	10	0	0	1
hsa-mir-1537	2998	17	0	0	1
hsa-mir-4677	2998	14	1	0	1
hsa-mir-2355	2998	4	0	0	1
hsa-mir-26b	2998	2	11	0	1
hsa-mir-375	2998	6	1	0	1
hsa-mir-3131	2998	3	0	0	1
hsa-mir-4777	2998	1	1	0	1
hsa-mir-5001	2998	30	0	0	1
hsa-mir-4786	2998	6	0	0	1
hsa-mir-149	2998	1	5	0	1
hsa-mir-4709	2998	3	0	0	1

[truncated: 9 more sheets: LGG.xlsx, LIHC.xlsx, LUAD.xlsx, LUSC.xlsx, OV.xlsx, PAAD.xlsx, PRAD.xlsx, THCA.xlsx, UCEC.xlsx]
