# Supplementary material for: Computing microRNA-gene interaction networks in pan-cancer using miRDriver
Source: Sci Rep. 2022 Mar 8;12:3717. doi: 10.1038/s41598-022-07628-z (PMC8904490; doi:10.1038/s41598-022-07628-z)
Supplement: Supplementary file 2 — Supplementary Information 2. [file 41598_2022_7628_MOESM2_ESM.xlsx]

## Sheet: Sheet1
Computing microRNA-gene interaction networks in pan-cancer using miRDriver Banabithi Bose, Matthew Moravec, and Serdar Bozdag
Supplemental Table 2
Comparison of miRDriver with AraCNe, ProMISe, hiddenICP, idaFast, jointIDA and Cupid

## Sheet: Supplemental Table 2
		Comparison of miRDriver with AraCNe, ProMISe, hiddenICP, idaFast, jointIDA and Cupid (BRCA only)
Cancer	Method	No. of. Input miRNAs	No. of. Input Genes	No. of computed miRNAs	No. of computed Genes	No. of. Eligible miRNAs	No. of. Eligible miRNAs in overlap with miRDriver with other Method	Method's Significant miRNAs in the overlap	miRDriver's Significant miRNAs in the overlap		Cancer	Method	No. of. Input miRNAs	No. of. Input Genes	No. of computed miRNAs	No. of computed Genes	No. of. Eligible miRNAs	No. of. Eligible miRNAs in overlap with miRDriver with other Method	Method's significant miRNAs in overlap	miRDriver's Significant miRNAs in the overlap
ACC	miRDriver	59	4683	33	253	28	NA	NA	NA		BRCA	miRDriver	255	6504	187	776	59	NA	NA	NA
ACC	AraCNe	59	4683	33	333	28	28	0	0		BRCA	Cupid	255	6504	141	463	105	54	7	30
ACC	ProMISe	59	4683	19	2283	17	17	1	0		BRCA	AraCNe	255	6504	151	266	51	35	0	20
ACC	hiddenICP	33	4683	33	4674	6	6	0	0		BRCA	ProMISe	255	6504	39	683	29	25	5	13
ACC	idaFast	33	1500	33	943	28	28	0	0		BRCA	hiddenICP	255	6504	33	6428	23	7	0	2
ACC	jointIDA	33	1500	25	1143	22	22	0	0		BRCA	idaFast	255	6504	38	1052	27	21	3	11
BLCA	miRDriver	360	5466	125	416	84	NA	NA	NA		BRCA	jointIDA	255	6504	49	1112	33	27	15	15
BLCA	AraCNe	360	5466	167	557	105	76	0	4
BLCA	ProMISe	360	5466	128	4021	83	62	3	4
BLCA	hiddenICP	185	5465	185	5460	91	65	2	4
BLCA	idaFast	50	1500	50	1102	41	29	0	3
BLCA	jointIDA	50	1500	50	1243	41	29	0	3
CESC	miRDriver	343	4514	86	349	61	NA	NA	NA
CESC	AraCNe	343	4514	152	558	100	59	0	7
CESC	ProMISe	343	4514	87	3385	71	27	3	5
CESC	hiddenICP	188	4514	187	4510	58	15	0	1
CESC	idaFast	50	1500	40	983	33	14	0	1
CESC	jointIDA	50	1500	47	1255	39	17	0	2
DLBC	miRDriver	57	3697	31	288	27	NA	NA	NA
DLBC	AraCNe	57	3697	33	332	29	27	0	4
DLBC	ProMISe	57	3697	24	1816	23	22	0	3
DLBC	hiddenICP	32	3696	32	3692	3	3	0	3
DLBC	idaFast	32	1499	32	871	29	27	0	4
DLBC	jointIDA	32	1499	28	1049	25	23	0	4
ESCA	miRDriver	256	4961	92	521	58	NA	NA	NA
ESCA	AraCNe	256	4961	127	351	66	56	1	3
ESCA	ProMISe	256	4961	51	2045	33	24	2	2
ESCA	hiddenICP	134	4961	134	4957	57	44	0	2
ESCA	idaFast	50	1500	50	1235	31	22	1	1
ESCA	jointIDA	50	1500	49	1382	31	22	0	1
HNSC	miRDriver	301	2591	75	205	48	NA	NA	NA
HNSC	AraCNe	301	2591	116	200	48	38	0	1
HNSC	ProMISe	301	2591	83	1909	48	24	0	1
HNSC	hiddenICP	167	2591	167	2591	57	33	0	0
HNSC	idaFast	50	1500	48	859	29	17	0	1
HNSC	jointIDA	50	1500	50	1172	29	17	0	1
KIRC	miRDriver	96	3995	29	501	12	NA	NA	NA
KIRC	AraCNe	96	3995	28	73	12	11	0	2
KIRC	ProMISe	96	3995	20	961	9	9	0	2
KIRC	hiddenICP	30	3995	30	2208	11	10	0	1
KIRC	idaFast	30	1500	27	805	12	11	0	2
KIRC	jointIDA	30	1500	30	1011	13	12	0	2
LAML	miRDriver	39	2878	21	431	19	NA	NA	NA
LAML	AraCNe	39	2878	21	109	19	19	0	2
LAML	ProMISe	39	2878	9	1087	8	8	0	2
LAML	hiddenICP	21	2877	21	2869	8	8	1	0
LAML	idaFast	21	1500	21	680	19	19	0	2
LAML	jointIDA	21	1500	19	910	17	17	1	2
LGG	miRDriver	172	1653	45	151	23	NA	NA	NA
LGG	AraCNe	172	1653	72	145	32	16	0	0
LGG	ProMISe	172	1653	30	1477	18	7	0	1
LGG	hiddenICP	100	1653	99	1653	30	12	1	1
LGG	idaFast	50	1500	47	917	27	10	0	1
LGG	jointIDA	50	1500	39	1441	22	9	0	1
LIHC	miRDriver	234	3642	71	224	43	NA	NA	NA
LIHC	AraCNe	234	3642	102	266	55	37	0	3
LIHC	ProMISe	234	3642	42	3083	26	18	1	2
LIHC	hiddenICP	112	3641	112	3641	43	32	0	3
LIHC	idaFast	50	1500	50	1266	28	20	0	2
LIHC	jointIDA	50	1500	50	1318	28	20	0	2
LUAD	miRDriver	542	4601	142	747	67	NA	NA	NA
LUAD	AraCNe	542	4601	250	947	113	65	0	2
LUAD	ProMISe	542	4601	158	3962	91	43	9	2
LUAD	hiddenICP	267	4600	267	4600	37	6	0	0
LUAD	idaFast	50	1500	50	1132	34	19	0	2
LUAD	jointIDA	50	1500	34	1451	21	11	0	1
LUSC	miRDriver	411	2735	105	266	51	NA	NA	NA
LUSC	AraCNe	411	2735	196	609	66	50	1	3
LUSC	ProMISe	411	2735	80	1694	31	20	2	0
LUSC	hiddenICP	205	2735	205	2735	2	0	0	0
LUSC	idaFast	50	1500	50	1066	25	16	0	0
LUSC	jointIDA	50	1500	49	1306	25	16	0	0
OV	miRDriver	198	2114	147	354	27	NA	NA	NA
OV	AraCNe	198	2114	196	791	59	27	1	20
OV	ProMISe	198	2114	57	1938	34	22	0	17
OV	hiddenICP	198	2101	198	2100	47	21	0	16
OV	idaFast	50	1500	50	1194	32	22	0	17
OV	jointIDA	50	1500	50	1294	32	22	0	17
PAAD	miRDriver	111	2945	55	371	35	NA	NA	NA
PAAD	AraCNe	111	2945	62	279	39	35	0	3
PAAD	ProMISe	111	2945	26	2463	17	14	1	2
PAAD	hiddenICP	62	2945	62	2928	19	18	1	3
PAAD	idaFast	50	1500	31	1211	20	17	0	2
PAAD	jointIDA	50	1500	49	1301	30	28	0	3
PRAD	miRDriver	194	4098	43	239	20	NA	NA	NA
PRAD	AraCNe	194	4098	75	365	29	20	0	1
PRAD	ProMISe	194	4098	29	2213	18	9	0	0
PRAD	hiddenICP	75	4098	75	4078	19	11	0	1
PRAD	idaFast	50	1500	50	1041	24	15	0	0
PRAD	jointIDA	50	1500	50	1227	24	15	1	0
THCA	miRDriver	6	1138	2	204	2	NA	NA	NA
THCA	AraCNe	6	1138	2	7	2	2	0	0
THCA	ProMISe	6	1138	2	36	2	2	0	0
THCA	hiddenICP	2	1138	2	636	2	2	0	0
THCA	idaFast	2	1138	2	79	2	2	0	0
THCA	jointIDA	2	1138	2	79	2	2	0	0
UCEC	miRDriver	421	6105	152	688	83	NA	NA	NA
UCEC	AraCNe	421	6105	195	576	97	75	0	5
UCEC	ProMISe	421	6105	89	5009	56	40	7	5
UCEC	hiddenICP	214	6104	213	6104	77	59	1	5
UCEC	idaFast	50	1500	50	1265	35	24	0	2
UCEC	jointIDA	50	1500	15	1479	8	6	0	0
