# Supplementary material for: Computing microRNA-gene interaction networks in pan-cancer using miRDriver
Source: Sci Rep. 2022 Mar 8;12:3717. doi: 10.1038/s41598-022-07628-z (PMC8904490; doi:10.1038/s41598-022-07628-z)
Supplement: Supplementary file 3 — Supplementary Information 3. [file 41598_2022_7628_MOESM3_ESM.xlsx]

## Sheet: Sheet1
Computing microRNA-gene interaction networks in pan-cancer using miRDriver Banabithi Bose, Matthew Moravec, and Serdar Bozdag
Supplemental Table S3
Enriched REACTOME, KEGG pathways, Cancer Hallmark terms and GO terms with selected genes in each cancer types.

## Sheet: REACTOME PATHWAYS
	REACTOME PATHWAYS
Cancer	Gene Set (HGNC Symbol)	REACTOME ID	Description	Adjusted p-value
ACC	ACP5,ADSSL1,AGRP,ALOX12P2,APCDD1L,AQP8,ARHGEF2,ASPDH,ATF3,BSN-DT,BTNL8,C10orf90,C11orf86,C1QB,C1QTNF12,C1QTNF2,C2,C2CD4C,C6orf223,CA12,CAPG,CARD16,CARNS1,CASC15,CCDC184,CCDC200,CCL4L2,CD209,CD300LB,CD72,CD80,CD83,CDCA7,CDH17,CDH7,CGREF1,CHST2,CKAP2L,CKM,CLCF1,CLCN3P1,COL1A1,COL5A3,COL6A2,CPN2,CR1,CTSW,CWH43,CXCL10,CYBRD1,CYP26B1,DCSTAMP,DCX,DDAH2,DGCR5,DLGAP2,DNAJC22,DOK2,DPYSL5,DZIP1L,ELOVL3,EMI…	R-HSA-168256	Immune System	4.83928e-14
ACC	ACP5,ADSSL1,AGRP,ALOX12P2,APCDD1L,AQP8,ARHGEF2,ASPDH,ATF3,BSN-DT,BTNL8,C10orf90,C11orf86,C1QB,C1QTNF12,C1QTNF2,C2,C2CD4C,C6orf223,CA12,CAPG,CARD16,CARNS1,CASC15,CCDC184,CCDC200,CCL4L2,CD209,CD300LB,CD72,CD80,CD83,CDCA7,CDH17,CDH7,CGREF1,CHST2,CKAP2L,CKM,CLCF1,CLCN3P1,COL1A1,COL5A3,COL6A2,CPN2,CR1,CTSW,CWH43,CXCL10,CYBRD1,CYP26B1,DCSTAMP,DCX,DDAH2,DGCR5,DLGAP2,DNAJC22,DOK2,DPYSL5,DZIP1L,ELOVL3,EMI…	R-HSA-1430728	Metabolism	4.24532e-07
ACC	ACP5,ADSSL1,AGRP,ALOX12P2,APCDD1L,AQP8,ARHGEF2,ASPDH,ATF3,BSN-DT,BTNL8,C10orf90,C11orf86,C1QB,C1QTNF12,C1QTNF2,C2,C2CD4C,C6orf223,CA12,CAPG,CARD16,CARNS1,CASC15,CCDC184,CCDC200,CCL4L2,CD209,CD300LB,CD72,CD80,CD83,CDCA7,CDH17,CDH7,CGREF1,CHST2,CKAP2L,CKM,CLCF1,CLCN3P1,COL1A1,COL5A3,COL6A2,CPN2,CR1,CTSW,CWH43,CXCL10,CYBRD1,CYP26B1,DCSTAMP,DCX,DDAH2,DGCR5,DLGAP2,DNAJC22,DOK2,DPYSL5,DZIP1L,ELOVL3,EMI…	R-HSA-162582	Signal Transduction	8.9355e-07
ACC	ACP5,ADSSL1,AGRP,ALOX12P2,APCDD1L,AQP8,ARHGEF2,ASPDH,ATF3,BSN-DT,BTNL8,C10orf90,C11orf86,C1QB,C1QTNF12,C1QTNF2,C2,C2CD4C,C6orf223,CA12,CAPG,CARD16,CARNS1,CASC15,CCDC184,CCDC200,CCL4L2,CD209,CD300LB,CD72,CD80,CD83,CDCA7,CDH17,CDH7,CGREF1,CHST2,CKAP2L,CKM,CLCF1,CLCN3P1,COL1A1,COL5A3,COL6A2,CPN2,CR1,CTSW,CWH43,CXCL10,CYBRD1,CYP26B1,DCSTAMP,DCX,DDAH2,DGCR5,DLGAP2,DNAJC22,DOK2,DPYSL5,DZIP1L,ELOVL3,EMI…	R-HSA-2022090	Assembly of collagen fibrils and other multimeric structures	9.99614e-06
ACC	ACP5,ADSSL1,AGRP,ALOX12P2,APCDD1L,AQP8,ARHGEF2,ASPDH,ATF3,BSN-DT,BTNL8,C10orf90,C11orf86,C1QB,C1QTNF12,C1QTNF2,C2,C2CD4C,C6orf223,CA12,CAPG,CARD16,CARNS1,CASC15,CCDC184,CCDC200,CCL4L2,CD209,CD300LB,CD72,CD80,CD83,CDCA7,CDH17,CDH7,CGREF1,CHST2,CKAP2L,CKM,CLCF1,CLCN3P1,COL1A1,COL5A3,COL6A2,CPN2,CR1,CTSW,CWH43,CXCL10,CYBRD1,CYP26B1,DCSTAMP,DCX,DDAH2,DGCR5,DLGAP2,DNAJC22,DOK2,DPYSL5,DZIP1L,ELOVL3,EMI…	R-HSA-449147	Signaling by Interleukins	2.37642e-05
ACC	ACP5,ADSSL1,AGRP,ALOX12P2,APCDD1L,AQP8,ARHGEF2,ASPDH,ATF3,BSN-DT,BTNL8,C10orf90,C11orf86,C1QB,C1QTNF12,C1QTNF2,C2,C2CD4C,C6orf223,CA12,CAPG,CARD16,CARNS1,CASC15,CCDC184,CCDC200,CCL4L2,CD209,CD300LB,CD72,CD80,CD83,CDCA7,CDH17,CDH7,CGREF1,CHST2,CKAP2L,CKM,CLCF1,CLCN3P1,COL1A1,COL5A3,COL6A2,CPN2,CR1,CTSW,CWH43,CXCL10,CYBRD1,CYP26B1,DCSTAMP,DCX,DDAH2,DGCR5,DLGAP2,DNAJC22,DOK2,DPYSL5,DZIP1L,ELOVL3,EMI…	R-HSA-1280215	Cytokine Signaling in Immune system	3.21719e-05
ACC	ACP5,ADSSL1,AGRP,ALOX12P2,APCDD1L,AQP8,ARHGEF2,ASPDH,ATF3,BSN-DT,BTNL8,C10orf90,C11orf86,C1QB,C1QTNF12,C1QTNF2,C2,C2CD4C,C6orf223,CA12,CAPG,CARD16,CARNS1,CASC15,CCDC184,CCDC200,CCL4L2,CD209,CD300LB,CD72,CD80,CD83,CDCA7,CDH17,CDH7,CGREF1,CHST2,CKAP2L,CKM,CLCF1,CLCN3P1,COL1A1,COL5A3,COL6A2,CPN2,CR1,CTSW,CWH43,CXCL10,CYBRD1,CYP26B1,DCSTAMP,DCX,DDAH2,DGCR5,DLGAP2,DNAJC22,DOK2,DPYSL5,DZIP1L,ELOVL3,EMI…	R-HSA-1474290	Collagen formation	0.000161031
ACC	ACP5,ADSSL1,AGRP,ALOX12P2,APCDD1L,AQP8,ARHGEF2,ASPDH,ATF3,BSN-DT,BTNL8,C10orf90,C11orf86,C1QB,C1QTNF12,C1QTNF2,C2,C2CD4C,C6orf223,CA12,CAPG,CARD16,CARNS1,CASC15,CCDC184,CCDC200,CCL4L2,CD209,CD300LB,CD72,CD80,CD83,CDCA7,CDH17,CDH7,CGREF1,CHST2,CKAP2L,CKM,CLCF1,CLCN3P1,COL1A1,COL5A3,COL6A2,CPN2,CR1,CTSW,CWH43,CXCL10,CYBRD1,CYP26B1,DCSTAMP,DCX,DDAH2,DGCR5,DLGAP2,DNAJC22,DOK2,DPYSL5,DZIP1L,ELOVL3,EMI…	R-HSA-168249	Innate Immune System	0.000184741
ACC	ACP5,ADSSL1,AGRP,ALOX12P2,APCDD1L,AQP8,ARHGEF2,ASPDH,ATF3,BSN-DT,BTNL8,C10orf90,C11orf86,C1QB,C1QTNF12,C1QTNF2,C2,C2CD4C,C6orf223,CA12,CAPG,CARD16,CARNS1,CASC15,CCDC184,CCDC200,CCL4L2,CD209,CD300LB,CD72,CD80,CD83,CDCA7,CDH17,CDH7,CGREF1,CHST2,CKAP2L,CKM,CLCF1,CLCN3P1,COL1A1,COL5A3,COL6A2,CPN2,CR1,CTSW,CWH43,CXCL10,CYBRD1,CYP26B1,DCSTAMP,DCX,DDAH2,DGCR5,DLGAP2,DNAJC22,DOK2,DPYSL5,DZIP1L,ELOVL3,EMI…	R-HSA-8854691	Interleukin-20 family signaling	0.000866078
ACC	ACP5,ADSSL1,AGRP,ALOX12P2,APCDD1L,AQP8,ARHGEF2,ASPDH,ATF3,BSN-DT,BTNL8,C10orf90,C11orf86,C1QB,C1QTNF12,C1QTNF2,C2,C2CD4C,C6orf223,CA12,CAPG,CARD16,CARNS1,CASC15,CCDC184,CCDC200,CCL4L2,CD209,CD300LB,CD72,CD80,CD83,CDCA7,CDH17,CDH7,CGREF1,CHST2,CKAP2L,CKM,CLCF1,CLCN3P1,COL1A1,COL5A3,COL6A2,CPN2,CR1,CTSW,CWH43,CXCL10,CYBRD1,CYP26B1,DCSTAMP,DCX,DDAH2,DGCR5,DLGAP2,DNAJC22,DOK2,DPYSL5,DZIP1L,ELOVL3,EMI…	R-HSA-1474244	Extracellular matrix organization	0.00113617
ACC	ACP5,ADSSL1,AGRP,ALOX12P2,APCDD1L,AQP8,ARHGEF2,ASPDH,ATF3,BSN-DT,BTNL8,C10orf90,C11orf86,C1QB,C1QTNF12,C1QTNF2,C2,C2CD4C,C6orf223,CA12,CAPG,CARD16,CARNS1,CASC15,CCDC184,CCDC200,CCL4L2,CD209,CD300LB,CD72,CD80,CD83,CDCA7,CDH17,CDH7,CGREF1,CHST2,CKAP2L,CKM,CLCF1,CLCN3P1,COL1A1,COL5A3,COL6A2,CPN2,CR1,CTSW,CWH43,CXCL10,CYBRD1,CYP26B1,DCSTAMP,DCX,DDAH2,DGCR5,DLGAP2,DNAJC22,DOK2,DPYSL5,DZIP1L,ELOVL3,EMI…	R-HSA-109582	Hemostasis	0.00152814
ACC	ACP5,ADSSL1,AGRP,ALOX12P2,APCDD1L,AQP8,ARHGEF2,ASPDH,ATF3,BSN-DT,BTNL8,C10orf90,C11orf86,C1QB,C1QTNF12,C1QTNF2,C2,C2CD4C,C6orf223,CA12,CAPG,CARD16,CARNS1,CASC15,CCDC184,CCDC200,CCL4L2,CD209,CD300LB,CD72,CD80,CD83,CDCA7,CDH17,CDH7,CGREF1,CHST2,CKAP2L,CKM,CLCF1,CLCN3P1,COL1A1,COL5A3,COL6A2,CPN2,CR1,CTSW,CWH43,CXCL10,CYBRD1,CYP26B1,DCSTAMP,DCX,DDAH2,DGCR5,DLGAP2,DNAJC22,DOK2,DPYSL5,DZIP1L,ELOVL3,EMI…	R-HSA-382551	Transport of small molecules	0.00254009
ACC	ACP5,ADSSL1,AGRP,ALOX12P2,APCDD1L,AQP8,ARHGEF2,ASPDH,ATF3,BSN-DT,BTNL8,C10orf90,C11orf86,C1QB,C1QTNF12,C1QTNF2,C2,C2CD4C,C6orf223,CA12,CAPG,CARD16,CARNS1,CASC15,CCDC184,CCDC200,CCL4L2,CD209,CD300LB,CD72,CD80,CD83,CDCA7,CDH17,CDH7,CGREF1,CHST2,CKAP2L,CKM,CLCF1,CLCN3P1,COL1A1,COL5A3,COL6A2,CPN2,CR1,CTSW,CWH43,CXCL10,CYBRD1,CYP26B1,DCSTAMP,DCX,DDAH2,DGCR5,DLGAP2,DNAJC22,DOK2,DPYSL5,DZIP1L,ELOVL3,EMI…	R-HSA-1266738	Developmental Biology	0.00300047
ACC	ACP5,ADSSL1,AGRP,ALOX12P2,APCDD1L,AQP8,ARHGEF2,ASPDH,ATF3,BSN-DT,BTNL8,C10orf90,C11orf86,C1QB,C1QTNF12,C1QTNF2,C2,C2CD4C,C6orf223,CA12,CAPG,CARD16,CARNS1,CASC15,CCDC184,CCDC200,CCL4L2,CD209,CD300LB,CD72,CD80,CD83,CDCA7,CDH17,CDH7,CGREF1,CHST2,CKAP2L,CKM,CLCF1,CLCN3P1,COL1A1,COL5A3,COL6A2,CPN2,CR1,CTSW,CWH43,CXCL10,CYBRD1,CYP26B1,DCSTAMP,DCX,DDAH2,DGCR5,DLGAP2,DNAJC22,DOK2,DPYSL5,DZIP1L,ELOVL3,EMI…	R-HSA-6798695	Neutrophil degranulation	0.00445757
ACC	ACP5,ADSSL1,AGRP,ALOX12P2,APCDD1L,AQP8,ARHGEF2,ASPDH,ATF3,BSN-DT,BTNL8,C10orf90,C11orf86,C1QB,C1QTNF12,C1QTNF2,C2,C2CD4C,C6orf223,CA12,CAPG,CARD16,CARNS1,CASC15,CCDC184,CCDC200,CCL4L2,CD209,CD300LB,CD72,CD80,CD83,CDCA7,CDH17,CDH7,CGREF1,CHST2,CKAP2L,CKM,CLCF1,CLCN3P1,COL1A1,COL5A3,COL6A2,CPN2,CR1,CTSW,CWH43,CXCL10,CYBRD1,CYP26B1,DCSTAMP,DCX,DDAH2,DGCR5,DLGAP2,DNAJC22,DOK2,DPYSL5,DZIP1L,ELOVL3,EMI…	R-HSA-372790	Signaling by GPCR	0.013409
ACC	ACP5,ADSSL1,AGRP,ALOX12P2,APCDD1L,AQP8,ARHGEF2,ASPDH,ATF3,BSN-DT,BTNL8,C10orf90,C11orf86,C1QB,C1QTNF12,C1QTNF2,C2,C2CD4C,C6orf223,CA12,CAPG,CARD16,CARNS1,CASC15,CCDC184,CCDC200,CCL4L2,CD209,CD300LB,CD72,CD80,CD83,CDCA7,CDH17,CDH7,CGREF1,CHST2,CKAP2L,CKM,CLCF1,CLCN3P1,COL1A1,COL5A3,COL6A2,CPN2,CR1,CTSW,CWH43,CXCL10,CYBRD1,CYP26B1,DCSTAMP,DCX,DDAH2,DGCR5,DLGAP2,DNAJC22,DOK2,DPYSL5,DZIP1L,ELOVL3,EMI…	R-HSA-1500931	Cell-Cell communication	0.0225957
ACC	ACP5,ADSSL1,AGRP,ALOX12P2,APCDD1L,AQP8,ARHGEF2,ASPDH,ATF3,BSN-DT,BTNL8,C10orf90,C11orf86,C1QB,C1QTNF12,C1QTNF2,C2,C2CD4C,C6orf223,CA12,CAPG,CARD16,CARNS1,CASC15,CCDC184,CCDC200,CCL4L2,CD209,CD300LB,CD72,CD80,CD83,CDCA7,CDH17,CDH7,CGREF1,CHST2,CKAP2L,CKM,CLCF1,CLCN3P1,COL1A1,COL5A3,COL6A2,CPN2,CR1,CTSW,CWH43,CXCL10,CYBRD1,CYP26B1,DCSTAMP,DCX,DDAH2,DGCR5,DLGAP2,DNAJC22,DOK2,DPYSL5,DZIP1L,ELOVL3,EMI…	R-HSA-373076	Class A/1 (Rhodopsin-like receptors)	0.0304514
ACC	ACP5,ADSSL1,AGRP,ALOX12P2,APCDD1L,AQP8,ARHGEF2,ASPDH,ATF3,BSN-DT,BTNL8,C10orf90,C11orf86,C1QB,C1QTNF12,C1QTNF2,C2,C2CD4C,C6orf223,CA12,CAPG,CARD16,CARNS1,CASC15,CCDC184,CCDC200,CCL4L2,CD209,CD300LB,CD72,CD80,CD83,CDCA7,CDH17,CDH7,CGREF1,CHST2,CKAP2L,CKM,CLCF1,CLCN3P1,COL1A1,COL5A3,COL6A2,CPN2,CR1,CTSW,CWH43,CXCL10,CYBRD1,CYP26B1,DCSTAMP,DCX,DDAH2,DGCR5,DLGAP2,DNAJC22,DOK2,DPYSL5,DZIP1L,ELOVL3,EMI…	R-HSA-500792	GPCR ligand binding	0.0323334
ACC	ACP5,ADSSL1,AGRP,ALOX12P2,APCDD1L,AQP8,ARHGEF2,ASPDH,ATF3,BSN-DT,BTNL8,C10orf90,C11orf86,C1QB,C1QTNF12,C1QTNF2,C2,C2CD4C,C6orf223,CA12,CAPG,CARD16,CARNS1,CASC15,CCDC184,CCDC200,CCL4L2,CD209,CD300LB,CD72,CD80,CD83,CDCA7,CDH17,CDH7,CGREF1,CHST2,CKAP2L,CKM,CLCF1,CLCN3P1,COL1A1,COL5A3,COL6A2,CPN2,CR1,CTSW,CWH43,CXCL10,CYBRD1,CYP26B1,DCSTAMP,DCX,DDAH2,DGCR5,DLGAP2,DNAJC22,DOK2,DPYSL5,DZIP1L,ELOVL3,EMI…	R-HSA-388396	GPCR downstream signalling	0.0375926
ACC	ACP5,ADSSL1,AGRP,ALOX12P2,APCDD1L,AQP8,ARHGEF2,ASPDH,ATF3,BSN-DT,BTNL8,C10orf90,C11orf86,C1QB,C1QTNF12,C1QTNF2,C2,C2CD4C,C6orf223,CA12,CAPG,CARD16,CARNS1,CASC15,CCDC184,CCDC200,CCL4L2,CD209,CD300LB,CD72,CD80,CD83,CDCA7,CDH17,CDH7,CGREF1,CHST2,CKAP2L,CKM,CLCF1,CLCN3P1,COL1A1,COL5A3,COL6A2,CPN2,CR1,CTSW,CWH43,CXCL10,CYBRD1,CYP26B1,DCSTAMP,DCX,DDAH2,DGCR5,DLGAP2,DNAJC22,DOK2,DPYSL5,DZIP1L,ELOVL3,EMI…	R-HSA-1650814	Collagen biosynthesis and modifying enzymes	0.0412515
ACC	ACP5,ADSSL1,AGRP,ALOX12P2,APCDD1L,AQP8,ARHGEF2,ASPDH,ATF3,BSN-DT,BTNL8,C10orf90,C11orf86,C1QB,C1QTNF12,C1QTNF2,C2,C2CD4C,C6orf223,CA12,CAPG,CARD16,CARNS1,CASC15,CCDC184,CCDC200,CCL4L2,CD209,CD300LB,CD72,CD80,CD83,CDCA7,CDH17,CDH7,CGREF1,CHST2,CKAP2L,CKM,CLCF1,CLCN3P1,COL1A1,COL5A3,COL6A2,CPN2,CR1,CTSW,CWH43,CXCL10,CYBRD1,CYP26B1,DCSTAMP,DCX,DDAH2,DGCR5,DLGAP2,DNAJC22,DOK2,DPYSL5,DZIP1L,ELOVL3,EMI…	R-HSA-428930	Thromboxane signalling through TP receptor	0.0456933
BLCA	AADACP1,ABCA4,ABCC2,ABCG8,ACOD1,ACOT12,ACTG2,ADRA1D,ADRB3,AKR1B10,ANKRD62P1-PARP4P3,ANKRD7,ANTXRLP1,APCDD1L-DT,APLN,APOBEC4,AQP4-AS1,ARSF,ASTL,ASXL3,ATP6V0CP2,BHMT2,BNC1,BNIP3P24,BPIFB4,BTBD9-AS1,BTNL3,C10orf82,C12orf77,C1QBPP2,C1QTNF9,C2orf69P1,C4orf17,C8orf34-AS1,C9orf131,C9orf147,CA2,CA4,CA7,CADM2-AS1,CADPS,CALML3-AS1,CAMKV,CAPZA3,CCBE1,CCDC144A,CCDC162P,CCDC60,CCDC83,CCKBR,CCR3,CCT4P1,CD36,CE…	R-HSA-500792	GPCR ligand binding	1.08587e-07
BLCA	AADACP1,ABCA4,ABCC2,ABCG8,ACOD1,ACOT12,ACTG2,ADRA1D,ADRB3,AKR1B10,ANKRD62P1-PARP4P3,ANKRD7,ANTXRLP1,APCDD1L-DT,APLN,APOBEC4,AQP4-AS1,ARSF,ASTL,ASXL3,ATP6V0CP2,BHMT2,BNC1,BNIP3P24,BPIFB4,BTBD9-AS1,BTNL3,C10orf82,C12orf77,C1QBPP2,C1QTNF9,C2orf69P1,C4orf17,C8orf34-AS1,C9orf131,C9orf147,CA2,CA4,CA7,CADM2-AS1,CADPS,CALML3-AS1,CAMKV,CAPZA3,CCBE1,CCDC144A,CCDC162P,CCDC60,CCDC83,CCKBR,CCR3,CCT4P1,CD36,CE…	R-HSA-1266738	Developmental Biology	4.34319e-07
BLCA	AADACP1,ABCA4,ABCC2,ABCG8,ACOD1,ACOT12,ACTG2,ADRA1D,ADRB3,AKR1B10,ANKRD62P1-PARP4P3,ANKRD7,ANTXRLP1,APCDD1L-DT,APLN,APOBEC4,AQP4-AS1,ARSF,ASTL,ASXL3,ATP6V0CP2,BHMT2,BNC1,BNIP3P24,BPIFB4,BTBD9-AS1,BTNL3,C10orf82,C12orf77,C1QBPP2,C1QTNF9,C2orf69P1,C4orf17,C8orf34-AS1,C9orf131,C9orf147,CA2,CA4,CA7,CADM2-AS1,CADPS,CALML3-AS1,CAMKV,CAPZA3,CCBE1,CCDC144A,CCDC162P,CCDC60,CCDC83,CCKBR,CCR3,CCT4P1,CD36,CE…	R-HSA-372790	Signaling by GPCR	5.52434e-06
BLCA	AADACP1,ABCA4,ABCC2,ABCG8,ACOD1,ACOT12,ACTG2,ADRA1D,ADRB3,AKR1B10,ANKRD62P1-PARP4P3,ANKRD7,ANTXRLP1,APCDD1L-DT,APLN,APOBEC4,AQP4-AS1,ARSF,ASTL,ASXL3,ATP6V0CP2,BHMT2,BNC1,BNIP3P24,BPIFB4,BTBD9-AS1,BTNL3,C10orf82,C12orf77,C1QBPP2,C1QTNF9,C2orf69P1,C4orf17,C8orf34-AS1,C9orf131,C9orf147,CA2,CA4,CA7,CADM2-AS1,CADPS,CALML3-AS1,CAMKV,CAPZA3,CCBE1,CCDC144A,CCDC162P,CCDC60,CCDC83,CCKBR,CCR3,CCT4P1,CD36,CE…	R-HSA-6805567	Keratinization	2.95428e-05
BLCA	AADACP1,ABCA4,ABCC2,ABCG8,ACOD1,ACOT12,ACTG2,ADRA1D,ADRB3,AKR1B10,ANKRD62P1-PARP4P3,ANKRD7,ANTXRLP1,APCDD1L-DT,APLN,APOBEC4,AQP4-AS1,ARSF,ASTL,ASXL3,ATP6V0CP2,BHMT2,BNC1,BNIP3P24,BPIFB4,BTBD9-AS1,BTNL3,C10orf82,C12orf77,C1QBPP2,C1QTNF9,C2orf69P1,C4orf17,C8orf34-AS1,C9orf131,C9orf147,CA2,CA4,CA7,CADM2-AS1,CADPS,CALML3-AS1,CAMKV,CAPZA3,CCBE1,CCDC144A,CCDC162P,CCDC60,CCDC83,CCKBR,CCR3,CCT4P1,CD36,CE…	R-HSA-1430728	Metabolism	3.27633e-05
BLCA	AADACP1,ABCA4,ABCC2,ABCG8,ACOD1,ACOT12,ACTG2,ADRA1D,ADRB3,AKR1B10,ANKRD62P1-PARP4P3,ANKRD7,ANTXRLP1,APCDD1L-DT,APLN,APOBEC4,AQP4-AS1,ARSF,ASTL,ASXL3,ATP6V0CP2,BHMT2,BNC1,BNIP3P24,BPIFB4,BTBD9-AS1,BTNL3,C10orf82,C12orf77,C1QBPP2,C1QTNF9,C2orf69P1,C4orf17,C8orf34-AS1,C9orf131,C9orf147,CA2,CA4,CA7,CADM2-AS1,CADPS,CALML3-AS1,CAMKV,CAPZA3,CCBE1,CCDC144A,CCDC162P,CCDC60,CCDC83,CCKBR,CCR3,CCT4P1,CD36,CE…	R-HSA-388396	GPCR downstream signalling	5.33158e-05
BLCA	AADACP1,ABCA4,ABCC2,ABCG8,ACOD1,ACOT12,ACTG2,ADRA1D,ADRB3,AKR1B10,ANKRD62P1-PARP4P3,ANKRD7,ANTXRLP1,APCDD1L-DT,APLN,APOBEC4,AQP4-AS1,ARSF,ASTL,ASXL3,ATP6V0CP2,BHMT2,BNC1,BNIP3P24,BPIFB4,BTBD9-AS1,BTNL3,C10orf82,C12orf77,C1QBPP2,C1QTNF9,C2orf69P1,C4orf17,C8orf34-AS1,C9orf131,C9orf147,CA2,CA4,CA7,CADM2-AS1,CADPS,CALML3-AS1,CAMKV,CAPZA3,CCBE1,CCDC144A,CCDC162P,CCDC60,CCDC83,CCKBR,CCR3,CCT4P1,CD36,CE…	R-HSA-418594	G alpha (i) signalling events	0.00013674
BLCA	AADACP1,ABCA4,ABCC2,ABCG8,ACOD1,ACOT12,ACTG2,ADRA1D,ADRB3,AKR1B10,ANKRD62P1-PARP4P3,ANKRD7,ANTXRLP1,APCDD1L-DT,APLN,APOBEC4,AQP4-AS1,ARSF,ASTL,ASXL3,ATP6V0CP2,BHMT2,BNC1,BNIP3P24,BPIFB4,BTBD9-AS1,BTNL3,C10orf82,C12orf77,C1QBPP2,C1QTNF9,C2orf69P1,C4orf17,C8orf34-AS1,C9orf131,C9orf147,CA2,CA4,CA7,CADM2-AS1,CADPS,CALML3-AS1,CAMKV,CAPZA3,CCBE1,CCDC144A,CCDC162P,CCDC60,CCDC83,CCKBR,CCR3,CCT4P1,CD36,CE…	R-HSA-373076	Class A/1 (Rhodopsin-like receptors)	0.000168152
BLCA	AADACP1,ABCA4,ABCC2,ABCG8,ACOD1,ACOT12,ACTG2,ADRA1D,ADRB3,AKR1B10,ANKRD62P1-PARP4P3,ANKRD7,ANTXRLP1,APCDD1L-DT,APLN,APOBEC4,AQP4-AS1,ARSF,ASTL,ASXL3,ATP6V0CP2,BHMT2,BNC1,BNIP3P24,BPIFB4,BTBD9-AS1,BTNL3,C10orf82,C12orf77,C1QBPP2,C1QTNF9,C2orf69P1,C4orf17,C8orf34-AS1,C9orf131,C9orf147,CA2,CA4,CA7,CADM2-AS1,CADPS,CALML3-AS1,CAMKV,CAPZA3,CCBE1,CCDC144A,CCDC162P,CCDC60,CCDC83,CCKBR,CCR3,CCT4P1,CD36,CE…	R-HSA-162582	Signal Transduction	0.000817599
BLCA	AADACP1,ABCA4,ABCC2,ABCG8,ACOD1,ACOT12,ACTG2,ADRA1D,ADRB3,AKR1B10,ANKRD62P1-PARP4P3,ANKRD7,ANTXRLP1,APCDD1L-DT,APLN,APOBEC4,AQP4-AS1,ARSF,ASTL,ASXL3,ATP6V0CP2,BHMT2,BNC1,BNIP3P24,BPIFB4,BTBD9-AS1,BTNL3,C10orf82,C12orf77,C1QBPP2,C1QTNF9,C2orf69P1,C4orf17,C8orf34-AS1,C9orf131,C9orf147,CA2,CA4,CA7,CADM2-AS1,CADPS,CALML3-AS1,CAMKV,CAPZA3,CCBE1,CCDC144A,CCDC162P,CCDC60,CCDC83,CCKBR,CCR3,CCT4P1,CD36,CE…	R-HSA-211859	Biological oxidations	0.00520229
BLCA	AADACP1,ABCA4,ABCC2,ABCG8,ACOD1,ACOT12,ACTG2,ADRA1D,ADRB3,AKR1B10,ANKRD62P1-PARP4P3,ANKRD7,ANTXRLP1,APCDD1L-DT,APLN,APOBEC4,AQP4-AS1,ARSF,ASTL,ASXL3,ATP6V0CP2,BHMT2,BNC1,BNIP3P24,BPIFB4,BTBD9-AS1,BTNL3,C10orf82,C12orf77,C1QBPP2,C1QTNF9,C2orf69P1,C4orf17,C8orf34-AS1,C9orf131,C9orf147,CA2,CA4,CA7,CADM2-AS1,CADPS,CALML3-AS1,CAMKV,CAPZA3,CCBE1,CCDC144A,CCDC162P,CCDC60,CCDC83,CCKBR,CCR3,CCT4P1,CD36,CE…	R-HSA-382551	Transport of small molecules	0.0108106
BLCA	AADACP1,ABCA4,ABCC2,ABCG8,ACOD1,ACOT12,ACTG2,ADRA1D,ADRB3,AKR1B10,ANKRD62P1-PARP4P3,ANKRD7,ANTXRLP1,APCDD1L-DT,APLN,APOBEC4,AQP4-AS1,ARSF,ASTL,ASXL3,ATP6V0CP2,BHMT2,BNC1,BNIP3P24,BPIFB4,BTBD9-AS1,BTNL3,C10orf82,C12orf77,C1QBPP2,C1QTNF9,C2orf69P1,C4orf17,C8orf34-AS1,C9orf131,C9orf147,CA2,CA4,CA7,CADM2-AS1,CADPS,CALML3-AS1,CAMKV,CAPZA3,CCBE1,CCDC144A,CCDC162P,CCDC60,CCDC83,CCKBR,CCR3,CCT4P1,CD36,CE…	R-HSA-556833	Metabolism of lipids	0.0144552
BLCA	AADACP1,ABCA4,ABCC2,ABCG8,ACOD1,ACOT12,ACTG2,ADRA1D,ADRB3,AKR1B10,ANKRD62P1-PARP4P3,ANKRD7,ANTXRLP1,APCDD1L-DT,APLN,APOBEC4,AQP4-AS1,ARSF,ASTL,ASXL3,ATP6V0CP2,BHMT2,BNC1,BNIP3P24,BPIFB4,BTBD9-AS1,BTNL3,C10orf82,C12orf77,C1QBPP2,C1QTNF9,C2orf69P1,C4orf17,C8orf34-AS1,C9orf131,C9orf147,CA2,CA4,CA7,CADM2-AS1,CADPS,CALML3-AS1,CAMKV,CAPZA3,CCBE1,CCDC144A,CCDC162P,CCDC60,CCDC83,CCKBR,CCR3,CCT4P1,CD36,CE…	R-HSA-1475029	Reversible hydration of carbon dioxide	0.0255722
BLCA	AADACP1,ABCA4,ABCC2,ABCG8,ACOD1,ACOT12,ACTG2,ADRA1D,ADRB3,AKR1B10,ANKRD62P1-PARP4P3,ANKRD7,ANTXRLP1,APCDD1L-DT,APLN,APOBEC4,AQP4-AS1,ARSF,ASTL,ASXL3,ATP6V0CP2,BHMT2,BNC1,BNIP3P24,BPIFB4,BTBD9-AS1,BTNL3,C10orf82,C12orf77,C1QBPP2,C1QTNF9,C2orf69P1,C4orf17,C8orf34-AS1,C9orf131,C9orf147,CA2,CA4,CA7,CADM2-AS1,CADPS,CALML3-AS1,CAMKV,CAPZA3,CCBE1,CCDC144A,CCDC162P,CCDC60,CCDC83,CCKBR,CCR3,CCT4P1,CD36,CE…	R-HSA-375280	Amine ligand-binding receptors	0.0488685
BRCA	,AADACP1,ABAT,ABCA13,ABCA8,ABCC13,ACER2,ACKR1,ACMSD,ACSL6,ACTG2,ADAM20,ADAM33,ADAMTS19-AS1,ADAMTS3,ADAMTS9-AS1,ADAMTSL5,ADCY5,ADGRF4,ADGRG2,ADH1A,ADH1B,ADIPOQ,ADORA2B,AFAP1-AS1,AKAP14,AKR1B10,ALDH1L1-AS2,ALK,AMBP,AMER1,AMER3,AMMECR1LP1,ANAPC1P1,ANKRD20A11P,ANKRD30A,ANKRD30BL,ANKRD34C,ANKRD35,ANKRD36BP2,ANKRD62P1,ANKS6,ANXA9,AOX2P,APCDD1L,APOBEC3B,APOBEC4,APOD,AQP10,AQP7P1,AR,ARHGAP31-AS1,ARHGAP40…	R-HSA-162582	Signal Transduction	1.24492e-17
BRCA	,AADACP1,ABAT,ABCA13,ABCA8,ABCC13,ACER2,ACKR1,ACMSD,ACSL6,ACTG2,ADAM20,ADAM33,ADAMTS19-AS1,ADAMTS3,ADAMTS9-AS1,ADAMTSL5,ADCY5,ADGRF4,ADGRG2,ADH1A,ADH1B,ADIPOQ,ADORA2B,AFAP1-AS1,AKAP14,AKR1B10,ALDH1L1-AS2,ALK,AMBP,AMER1,AMER3,AMMECR1LP1,ANAPC1P1,ANKRD20A11P,ANKRD30A,ANKRD30BL,ANKRD34C,ANKRD35,ANKRD36BP2,ANKRD62P1,ANKS6,ANXA9,AOX2P,APCDD1L,APOBEC3B,APOBEC4,APOD,AQP10,AQP7P1,AR,ARHGAP31-AS1,ARHGAP40…	R-HSA-373076	Class A/1 (Rhodopsin-like receptors)	5.23889e-17
BRCA	,AADACP1,ABAT,ABCA13,ABCA8,ABCC13,ACER2,ACKR1,ACMSD,ACSL6,ACTG2,ADAM20,ADAM33,ADAMTS19-AS1,ADAMTS3,ADAMTS9-AS1,ADAMTSL5,ADCY5,ADGRF4,ADGRG2,ADH1A,ADH1B,ADIPOQ,ADORA2B,AFAP1-AS1,AKAP14,AKR1B10,ALDH1L1-AS2,ALK,AMBP,AMER1,AMER3,AMMECR1LP1,ANAPC1P1,ANKRD20A11P,ANKRD30A,ANKRD30BL,ANKRD34C,ANKRD35,ANKRD36BP2,ANKRD62P1,ANKS6,ANXA9,AOX2P,APCDD1L,APOBEC3B,APOBEC4,APOD,AQP10,AQP7P1,AR,ARHGAP31-AS1,ARHGAP40…	R-HSA-500792	GPCR ligand binding	3.04579e-15
BRCA	,AADACP1,ABAT,ABCA13,ABCA8,ABCC13,ACER2,ACKR1,ACMSD,ACSL6,ACTG2,ADAM20,ADAM33,ADAMTS19-AS1,ADAMTS3,ADAMTS9-AS1,ADAMTSL5,ADCY5,ADGRF4,ADGRG2,ADH1A,ADH1B,ADIPOQ,ADORA2B,AFAP1-AS1,AKAP14,AKR1B10,ALDH1L1-AS2,ALK,AMBP,AMER1,AMER3,AMMECR1LP1,ANAPC1P1,ANKRD20A11P,ANKRD30A,ANKRD30BL,ANKRD34C,ANKRD35,ANKRD36BP2,ANKRD62P1,ANKS6,ANXA9,AOX2P,APCDD1L,APOBEC3B,APOBEC4,APOD,AQP10,AQP7P1,AR,ARHGAP31-AS1,ARHGAP40…	R-HSA-168256	Immune System	1.03683e-14
BRCA	,AADACP1,ABAT,ABCA13,ABCA8,ABCC13,ACER2,ACKR1,ACMSD,ACSL6,ACTG2,ADAM20,ADAM33,ADAMTS19-AS1,ADAMTS3,ADAMTS9-AS1,ADAMTSL5,ADCY5,ADGRF4,ADGRG2,ADH1A,ADH1B,ADIPOQ,ADORA2B,AFAP1-AS1,AKAP14,AKR1B10,ALDH1L1-AS2,ALK,AMBP,AMER1,AMER3,AMMECR1LP1,ANAPC1P1,ANKRD20A11P,ANKRD30A,ANKRD30BL,ANKRD34C,ANKRD35,ANKRD36BP2,ANKRD62P1,ANKS6,ANXA9,AOX2P,APCDD1L,APOBEC3B,APOBEC4,APOD,AQP10,AQP7P1,AR,ARHGAP31-AS1,ARHGAP40…	R-HSA-1430728	Metabolism	1.30983e-13
BRCA	,AADACP1,ABAT,ABCA13,ABCA8,ABCC13,ACER2,ACKR1,ACMSD,ACSL6,ACTG2,ADAM20,ADAM33,ADAMTS19-AS1,ADAMTS3,ADAMTS9-AS1,ADAMTSL5,ADCY5,ADGRF4,ADGRG2,ADH1A,ADH1B,ADIPOQ,ADORA2B,AFAP1-AS1,AKAP14,AKR1B10,ALDH1L1-AS2,ALK,AMBP,AMER1,AMER3,AMMECR1LP1,ANAPC1P1,ANKRD20A11P,ANKRD30A,ANKRD30BL,ANKRD34C,ANKRD35,ANKRD36BP2,ANKRD62P1,ANKS6,ANXA9,AOX2P,APCDD1L,APOBEC3B,APOBEC4,APOD,AQP10,AQP7P1,AR,ARHGAP31-AS1,ARHGAP40…	R-HSA-372790	Signaling by GPCR	1.61571e-13
BRCA	,AADACP1,ABAT,ABCA13,ABCA8,ABCC13,ACER2,ACKR1,ACMSD,ACSL6,ACTG2,ADAM20,ADAM33,ADAMTS19-AS1,ADAMTS3,ADAMTS9-AS1,ADAMTSL5,ADCY5,ADGRF4,ADGRG2,ADH1A,ADH1B,ADIPOQ,ADORA2B,AFAP1-AS1,AKAP14,AKR1B10,ALDH1L1-AS2,ALK,AMBP,AMER1,AMER3,AMMECR1LP1,ANAPC1P1,ANKRD20A11P,ANKRD30A,ANKRD30BL,ANKRD34C,ANKRD35,ANKRD36BP2,ANKRD62P1,ANKS6,ANXA9,AOX2P,APCDD1L,APOBEC3B,APOBEC4,APOD,AQP10,AQP7P1,AR,ARHGAP31-AS1,ARHGAP40…	R-HSA-388396	GPCR downstream signalling	3.384e-12
BRCA	,AADACP1,ABAT,ABCA13,ABCA8,ABCC13,ACER2,ACKR1,ACMSD,ACSL6,ACTG2,ADAM20,ADAM33,ADAMTS19-AS1,ADAMTS3,ADAMTS9-AS1,ADAMTSL5,ADCY5,ADGRF4,ADGRG2,ADH1A,ADH1B,ADIPOQ,ADORA2B,AFAP1-AS1,AKAP14,AKR1B10,ALDH1L1-AS2,ALK,AMBP,AMER1,AMER3,AMMECR1LP1,ANAPC1P1,ANKRD20A11P,ANKRD30A,ANKRD30BL,ANKRD34C,ANKRD35,ANKRD36BP2,ANKRD62P1,ANKS6,ANXA9,AOX2P,APCDD1L,APOBEC3B,APOBEC4,APOD,AQP10,AQP7P1,AR,ARHGAP31-AS1,ARHGAP40…	R-HSA-375276	Peptide ligand-binding receptors	1.48111e-11
BRCA	,AADACP1,ABAT,ABCA13,ABCA8,ABCC13,ACER2,ACKR1,ACMSD,ACSL6,ACTG2,ADAM20,ADAM33,ADAMTS19-AS1,ADAMTS3,ADAMTS9-AS1,ADAMTSL5,ADCY5,ADGRF4,ADGRG2,ADH1A,ADH1B,ADIPOQ,ADORA2B,AFAP1-AS1,AKAP14,AKR1B10,ALDH1L1-AS2,ALK,AMBP,AMER1,AMER3,AMMECR1LP1,ANAPC1P1,ANKRD20A11P,ANKRD30A,ANKRD30BL,ANKRD34C,ANKRD35,ANKRD36BP2,ANKRD62P1,ANKS6,ANXA9,AOX2P,APCDD1L,APOBEC3B,APOBEC4,APOD,AQP10,AQP7P1,AR,ARHGAP31-AS1,ARHGAP40…	R-HSA-112316	Neuronal System	4.07082e-11
BRCA	,AADACP1,ABAT,ABCA13,ABCA8,ABCC13,ACER2,ACKR1,ACMSD,ACSL6,ACTG2,ADAM20,ADAM33,ADAMTS19-AS1,ADAMTS3,ADAMTS9-AS1,ADAMTSL5,ADCY5,ADGRF4,ADGRG2,ADH1A,ADH1B,ADIPOQ,ADORA2B,AFAP1-AS1,AKAP14,AKR1B10,ALDH1L1-AS2,ALK,AMBP,AMER1,AMER3,AMMECR1LP1,ANAPC1P1,ANKRD20A11P,ANKRD30A,ANKRD30BL,ANKRD34C,ANKRD35,ANKRD36BP2,ANKRD62P1,ANKS6,ANXA9,AOX2P,APCDD1L,APOBEC3B,APOBEC4,APOD,AQP10,AQP7P1,AR,ARHGAP31-AS1,ARHGAP40…	R-HSA-168249	Innate Immune System	7.04824e-11
BRCA	,AADACP1,ABAT,ABCA13,ABCA8,ABCC13,ACER2,ACKR1,ACMSD,ACSL6,ACTG2,ADAM20,ADAM33,ADAMTS19-AS1,ADAMTS3,ADAMTS9-AS1,ADAMTSL5,ADCY5,ADGRF4,ADGRG2,ADH1A,ADH1B,ADIPOQ,ADORA2B,AFAP1-AS1,AKAP14,AKR1B10,ALDH1L1-AS2,ALK,AMBP,AMER1,AMER3,AMMECR1LP1,ANAPC1P1,ANKRD20A11P,ANKRD30A,ANKRD30BL,ANKRD34C,ANKRD35,ANKRD36BP2,ANKRD62P1,ANKS6,ANXA9,AOX2P,APCDD1L,APOBEC3B,APOBEC4,APOD,AQP10,AQP7P1,AR,ARHGAP31-AS1,ARHGAP40…	R-HSA-166663	Initial triggering of complement	1.21278e-09
BRCA	,AADACP1,ABAT,ABCA13,ABCA8,ABCC13,ACER2,ACKR1,ACMSD,ACSL6,ACTG2,ADAM20,ADAM33,ADAMTS19-AS1,ADAMTS3,ADAMTS9-AS1,ADAMTSL5,ADCY5,ADGRF4,ADGRG2,ADH1A,ADH1B,ADIPOQ,ADORA2B,AFAP1-AS1,AKAP14,AKR1B10,ALDH1L1-AS2,ALK,AMBP,AMER1,AMER3,AMMECR1LP1,ANAPC1P1,ANKRD20A11P,ANKRD30A,ANKRD30BL,ANKRD34C,ANKRD35,ANKRD36BP2,ANKRD62P1,ANKS6,ANXA9,AOX2P,APCDD1L,APOBEC3B,APOBEC4,APOD,AQP10,AQP7P1,AR,ARHGAP31-AS1,ARHGAP40…	R-HSA-418594	G alpha (i) signalling events	5.09205e-09
BRCA	,AADACP1,ABAT,ABCA13,ABCA8,ABCC13,ACER2,ACKR1,ACMSD,ACSL6,ACTG2,ADAM20,ADAM33,ADAMTS19-AS1,ADAMTS3,ADAMTS9-AS1,ADAMTSL5,ADCY5,ADGRF4,ADGRG2,ADH1A,ADH1B,ADIPOQ,ADORA2B,AFAP1-AS1,AKAP14,AKR1B10,ALDH1L1-AS2,ALK,AMBP,AMER1,AMER3,AMMECR1LP1,ANAPC1P1,ANKRD20A11P,ANKRD30A,ANKRD30BL,ANKRD34C,ANKRD35,ANKRD36BP2,ANKRD62P1,ANKS6,ANXA9,AOX2P,APCDD1L,APOBEC3B,APOBEC4,APOD,AQP10,AQP7P1,AR,ARHGAP31-AS1,ARHGAP40…	R-HSA-166658	Complement cascade	5.34341e-08
BRCA	,AADACP1,ABAT,ABCA13,ABCA8,ABCC13,ACER2,ACKR1,ACMSD,ACSL6,ACTG2,ADAM20,ADAM33,ADAMTS19-AS1,ADAMTS3,ADAMTS9-AS1,ADAMTSL5,ADCY5,ADGRF4,ADGRG2,ADH1A,ADH1B,ADIPOQ,ADORA2B,AFAP1-AS1,AKAP14,AKR1B10,ALDH1L1-AS2,ALK,AMBP,AMER1,AMER3,AMMECR1LP1,ANAPC1P1,ANKRD20A11P,ANKRD30A,ANKRD30BL,ANKRD34C,ANKRD35,ANKRD36BP2,ANKRD62P1,ANKS6,ANXA9,AOX2P,APCDD1L,APOBEC3B,APOBEC4,APOD,AQP10,AQP7P1,AR,ARHGAP31-AS1,ARHGAP40…	R-HSA-2168880	Scavenging of heme from plasma	1.36027e-07
BRCA	,AADACP1,ABAT,ABCA13,ABCA8,ABCC13,ACER2,ACKR1,ACMSD,ACSL6,ACTG2,ADAM20,ADAM33,ADAMTS19-AS1,ADAMTS3,ADAMTS9-AS1,ADAMTSL5,ADCY5,ADGRF4,ADGRG2,ADH1A,ADH1B,ADIPOQ,ADORA2B,AFAP1-AS1,AKAP14,AKR1B10,ALDH1L1-AS2,ALK,AMBP,AMER1,AMER3,AMMECR1LP1,ANAPC1P1,ANKRD20A11P,ANKRD30A,ANKRD30BL,ANKRD34C,ANKRD35,ANKRD36BP2,ANKRD62P1,ANKS6,ANXA9,AOX2P,APCDD1L,APOBEC3B,APOBEC4,APOD,AQP10,AQP7P1,AR,ARHGAP31-AS1,ARHGAP40…	R-HSA-2173782	Binding and Uptake of Ligands by Scavenger Receptors	1.88125e-07
BRCA	,AADACP1,ABAT,ABCA13,ABCA8,ABCC13,ACER2,ACKR1,ACMSD,ACSL6,ACTG2,ADAM20,ADAM33,ADAMTS19-AS1,ADAMTS3,ADAMTS9-AS1,ADAMTSL5,ADCY5,ADGRF4,ADGRG2,ADH1A,ADH1B,ADIPOQ,ADORA2B,AFAP1-AS1,AKAP14,AKR1B10,ALDH1L1-AS2,ALK,AMBP,AMER1,AMER3,AMMECR1LP1,ANAPC1P1,ANKRD20A11P,ANKRD30A,ANKRD30BL,ANKRD34C,ANKRD35,ANKRD36BP2,ANKRD62P1,ANKS6,ANXA9,AOX2P,APCDD1L,APOBEC3B,APOBEC4,APOD,AQP10,AQP7P1,AR,ARHGAP31-AS1,ARHGAP40…	R-HSA-977606	Regulation of Complement cascade	3.0186e-07
BRCA	,AADACP1,ABAT,ABCA13,ABCA8,ABCC13,ACER2,ACKR1,ACMSD,ACSL6,ACTG2,ADAM20,ADAM33,ADAMTS19-AS1,ADAMTS3,ADAMTS9-AS1,ADAMTSL5,ADCY5,ADGRF4,ADGRG2,ADH1A,ADH1B,ADIPOQ,ADORA2B,AFAP1-AS1,AKAP14,AKR1B10,ALDH1L1-AS2,ALK,AMBP,AMER1,AMER3,AMMECR1LP1,ANAPC1P1,ANKRD20A11P,ANKRD30A,ANKRD30BL,ANKRD34C,ANKRD35,ANKRD36BP2,ANKRD62P1,ANKS6,ANXA9,AOX2P,APCDD1L,APOBEC3B,APOBEC4,APOD,AQP10,AQP7P1,AR,ARHGAP31-AS1,ARHGAP40…	R-HSA-109582	Hemostasis	5.23557e-07
BRCA	,AADACP1,ABAT,ABCA13,ABCA8,ABCC13,ACER2,ACKR1,ACMSD,ACSL6,ACTG2,ADAM20,ADAM33,ADAMTS19-AS1,ADAMTS3,ADAMTS9-AS1,ADAMTSL5,ADCY5,ADGRF4,ADGRG2,ADH1A,ADH1B,ADIPOQ,ADORA2B,AFAP1-AS1,AKAP14,AKR1B10,ALDH1L1-AS2,ALK,AMBP,AMER1,AMER3,AMMECR1LP1,ANAPC1P1,ANKRD20A11P,ANKRD30A,ANKRD30BL,ANKRD34C,ANKRD35,ANKRD36BP2,ANKRD62P1,ANKS6,ANXA9,AOX2P,APCDD1L,APOBEC3B,APOBEC4,APOD,AQP10,AQP7P1,AR,ARHGAP31-AS1,ARHGAP40…	R-HSA-382551	Transport of small molecules	1.48178e-06
BRCA	,AADACP1,ABAT,ABCA13,ABCA8,ABCC13,ACER2,ACKR1,ACMSD,ACSL6,ACTG2,ADAM20,ADAM33,ADAMTS19-AS1,ADAMTS3,ADAMTS9-AS1,ADAMTSL5,ADCY5,ADGRF4,ADGRG2,ADH1A,ADH1B,ADIPOQ,ADORA2B,AFAP1-AS1,AKAP14,AKR1B10,ALDH1L1-AS2,ALK,AMBP,AMER1,AMER3,AMMECR1LP1,ANAPC1P1,ANKRD20A11P,ANKRD30A,ANKRD30BL,ANKRD34C,ANKRD35,ANKRD36BP2,ANKRD62P1,ANKS6,ANXA9,AOX2P,APCDD1L,APOBEC3B,APOBEC4,APOD,AQP10,AQP7P1,AR,ARHGAP31-AS1,ARHGAP40…	R-HSA-173623	Classical antibody-mediated complement activation	1.6885e-06
BRCA	,AADACP1,ABAT,ABCA13,ABCA8,ABCC13,ACER2,ACKR1,ACMSD,ACSL6,ACTG2,ADAM20,ADAM33,ADAMTS19-AS1,ADAMTS3,ADAMTS9-AS1,ADAMTSL5,ADCY5,ADGRF4,ADGRG2,ADH1A,ADH1B,ADIPOQ,ADORA2B,AFAP1-AS1,AKAP14,AKR1B10,ALDH1L1-AS2,ALK,AMBP,AMER1,AMER3,AMMECR1LP1,ANAPC1P1,ANKRD20A11P,ANKRD30A,ANKRD30BL,ANKRD34C,ANKRD35,ANKRD36BP2,ANKRD62P1,ANKS6,ANXA9,AOX2P,APCDD1L,APOBEC3B,APOBEC4,APOD,AQP10,AQP7P1,AR,ARHGAP31-AS1,ARHGAP40…	R-HSA-2029481	FCGR activation	3.257e-06
BRCA	,AADACP1,ABAT,ABCA13,ABCA8,ABCC13,ACER2,ACKR1,ACMSD,ACSL6,ACTG2,ADAM20,ADAM33,ADAMTS19-AS1,ADAMTS3,ADAMTS9-AS1,ADAMTSL5,ADCY5,ADGRF4,ADGRG2,ADH1A,ADH1B,ADIPOQ,ADORA2B,AFAP1-AS1,AKAP14,AKR1B10,ALDH1L1-AS2,ALK,AMBP,AMER1,AMER3,AMMECR1LP1,ANAPC1P1,ANKRD20A11P,ANKRD30A,ANKRD30BL,ANKRD34C,ANKRD35,ANKRD36BP2,ANKRD62P1,ANKS6,ANXA9,AOX2P,APCDD1L,APOBEC3B,APOBEC4,APOD,AQP10,AQP7P1,AR,ARHGAP31-AS1,ARHGAP40…	R-HSA-5690714	CD22 mediated BCR regulation	3.92118e-06
BRCA	,AADACP1,ABAT,ABCA13,ABCA8,ABCC13,ACER2,ACKR1,ACMSD,ACSL6,ACTG2,ADAM20,ADAM33,ADAMTS19-AS1,ADAMTS3,ADAMTS9-AS1,ADAMTSL5,ADCY5,ADGRF4,ADGRG2,ADH1A,ADH1B,ADIPOQ,ADORA2B,AFAP1-AS1,AKAP14,AKR1B10,ALDH1L1-AS2,ALK,AMBP,AMER1,AMER3,AMMECR1LP1,ANAPC1P1,ANKRD20A11P,ANKRD30A,ANKRD30BL,ANKRD34C,ANKRD35,ANKRD36BP2,ANKRD62P1,ANKS6,ANXA9,AOX2P,APCDD1L,APOBEC3B,APOBEC4,APOD,AQP10,AQP7P1,AR,ARHGAP31-AS1,ARHGAP40…	R-HSA-166786	Creation of C4 and C2 activators	4.0127e-06
BRCA	,AADACP1,ABAT,ABCA13,ABCA8,ABCC13,ACER2,ACKR1,ACMSD,ACSL6,ACTG2,ADAM20,ADAM33,ADAMTS19-AS1,ADAMTS3,ADAMTS9-AS1,ADAMTSL5,ADCY5,ADGRF4,ADGRG2,ADH1A,ADH1B,ADIPOQ,ADORA2B,AFAP1-AS1,AKAP14,AKR1B10,ALDH1L1-AS2,ALK,AMBP,AMER1,AMER3,AMMECR1LP1,ANAPC1P1,ANKRD20A11P,ANKRD30A,ANKRD30BL,ANKRD34C,ANKRD35,ANKRD36BP2,ANKRD62P1,ANKS6,ANXA9,AOX2P,APCDD1L,APOBEC3B,APOBEC4,APOD,AQP10,AQP7P1,AR,ARHGAP31-AS1,ARHGAP40…	R-HSA-597592	Post-translational protein modification	6.59771e-06
BRCA	,AADACP1,ABAT,ABCA13,ABCA8,ABCC13,ACER2,ACKR1,ACMSD,ACSL6,ACTG2,ADAM20,ADAM33,ADAMTS19-AS1,ADAMTS3,ADAMTS9-AS1,ADAMTSL5,ADCY5,ADGRF4,ADGRG2,ADH1A,ADH1B,ADIPOQ,ADORA2B,AFAP1-AS1,AKAP14,AKR1B10,ALDH1L1-AS2,ALK,AMBP,AMER1,AMER3,AMMECR1LP1,ANAPC1P1,ANKRD20A11P,ANKRD30A,ANKRD30BL,ANKRD34C,ANKRD35,ANKRD36BP2,ANKRD62P1,ANKS6,ANXA9,AOX2P,APCDD1L,APOBEC3B,APOBEC4,APOD,AQP10,AQP7P1,AR,ARHGAP31-AS1,ARHGAP40…	R-HSA-2029485	Role of phospholipids in phagocytosis	1.16649e-05
BRCA	,AADACP1,ABAT,ABCA13,ABCA8,ABCC13,ACER2,ACKR1,ACMSD,ACSL6,ACTG2,ADAM20,ADAM33,ADAMTS19-AS1,ADAMTS3,ADAMTS9-AS1,ADAMTSL5,ADCY5,ADGRF4,ADGRG2,ADH1A,ADH1B,ADIPOQ,ADORA2B,AFAP1-AS1,AKAP14,AKR1B10,ALDH1L1-AS2,ALK,AMBP,AMER1,AMER3,AMMECR1LP1,ANAPC1P1,ANKRD20A11P,ANKRD30A,ANKRD30BL,ANKRD34C,ANKRD35,ANKRD36BP2,ANKRD62P1,ANKS6,ANXA9,AOX2P,APCDD1L,APOBEC3B,APOBEC4,APOD,AQP10,AQP7P1,AR,ARHGAP31-AS1,ARHGAP40…	R-HSA-2029482	Regulation of actin dynamics for phagocytic cup formation	1.58236e-05
BRCA	,AADACP1,ABAT,ABCA13,ABCA8,ABCC13,ACER2,ACKR1,ACMSD,ACSL6,ACTG2,ADAM20,ADAM33,ADAMTS19-AS1,ADAMTS3,ADAMTS9-AS1,ADAMTSL5,ADCY5,ADGRF4,ADGRG2,ADH1A,ADH1B,ADIPOQ,ADORA2B,AFAP1-AS1,AKAP14,AKR1B10,ALDH1L1-AS2,ALK,AMBP,AMER1,AMER3,AMMECR1LP1,ANAPC1P1,ANKRD20A11P,ANKRD30A,ANKRD30BL,ANKRD34C,ANKRD35,ANKRD36BP2,ANKRD62P1,ANKS6,ANXA9,AOX2P,APCDD1L,APOBEC3B,APOBEC4,APOD,AQP10,AQP7P1,AR,ARHGAP31-AS1,ARHGAP40…	R-HSA-392499	Metabolism of proteins	1.66039e-05
BRCA	,AADACP1,ABAT,ABCA13,ABCA8,ABCC13,ACER2,ACKR1,ACMSD,ACSL6,ACTG2,ADAM20,ADAM33,ADAMTS19-AS1,ADAMTS3,ADAMTS9-AS1,ADAMTSL5,ADCY5,ADGRF4,ADGRG2,ADH1A,ADH1B,ADIPOQ,ADORA2B,AFAP1-AS1,AKAP14,AKR1B10,ALDH1L1-AS2,ALK,AMBP,AMER1,AMER3,AMMECR1LP1,ANAPC1P1,ANKRD20A11P,ANKRD30A,ANKRD30BL,ANKRD34C,ANKRD35,ANKRD36BP2,ANKRD62P1,ANKS6,ANXA9,AOX2P,APCDD1L,APOBEC3B,APOBEC4,APOD,AQP10,AQP7P1,AR,ARHGAP31-AS1,ARHGAP40…	R-HSA-2871837	FCERI mediated NF-kB activation	4.19475e-05
BRCA	,AADACP1,ABAT,ABCA13,ABCA8,ABCC13,ACER2,ACKR1,ACMSD,ACSL6,ACTG2,ADAM20,ADAM33,ADAMTS19-AS1,ADAMTS3,ADAMTS9-AS1,ADAMTSL5,ADCY5,ADGRF4,ADGRG2,ADH1A,ADH1B,ADIPOQ,ADORA2B,AFAP1-AS1,AKAP14,AKR1B10,ALDH1L1-AS2,ALK,AMBP,AMER1,AMER3,AMMECR1LP1,ANAPC1P1,ANKRD20A11P,ANKRD30A,ANKRD30BL,ANKRD34C,ANKRD35,ANKRD36BP2,ANKRD62P1,ANKS6,ANXA9,AOX2P,APCDD1L,APOBEC3B,APOBEC4,APOD,AQP10,AQP7P1,AR,ARHGAP31-AS1,ARHGAP40…	R-HSA-5653656	Vesicle-mediated transport	4.24129e-05
BRCA	,AADACP1,ABAT,ABCA13,ABCA8,ABCC13,ACER2,ACKR1,ACMSD,ACSL6,ACTG2,ADAM20,ADAM33,ADAMTS19-AS1,ADAMTS3,ADAMTS9-AS1,ADAMTSL5,ADCY5,ADGRF4,ADGRG2,ADH1A,ADH1B,ADIPOQ,ADORA2B,AFAP1-AS1,AKAP14,AKR1B10,ALDH1L1-AS2,ALK,AMBP,AMER1,AMER3,AMMECR1LP1,ANAPC1P1,ANKRD20A11P,ANKRD30A,ANKRD30BL,ANKRD34C,ANKRD35,ANKRD36BP2,ANKRD62P1,ANKS6,ANXA9,AOX2P,APCDD1L,APOBEC3B,APOBEC4,APOD,AQP10,AQP7P1,AR,ARHGAP31-AS1,ARHGAP40…	R-HSA-1643685	Disease	4.29152e-05
BRCA	,AADACP1,ABAT,ABCA13,ABCA8,ABCC13,ACER2,ACKR1,ACMSD,ACSL6,ACTG2,ADAM20,ADAM33,ADAMTS19-AS1,ADAMTS3,ADAMTS9-AS1,ADAMTSL5,ADCY5,ADGRF4,ADGRG2,ADH1A,ADH1B,ADIPOQ,ADORA2B,AFAP1-AS1,AKAP14,AKR1B10,ALDH1L1-AS2,ALK,AMBP,AMER1,AMER3,AMMECR1LP1,ANAPC1P1,ANKRD20A11P,ANKRD30A,ANKRD30BL,ANKRD34C,ANKRD35,ANKRD36BP2,ANKRD62P1,ANKS6,ANXA9,AOX2P,APCDD1L,APOBEC3B,APOBEC4,APOD,AQP10,AQP7P1,AR,ARHGAP31-AS1,ARHGAP40…	R-HSA-2730905	Role of LAT2/NTAL/LAB on calcium mobilization	4.56727e-05
BRCA	,AADACP1,ABAT,ABCA13,ABCA8,ABCC13,ACER2,ACKR1,ACMSD,ACSL6,ACTG2,ADAM20,ADAM33,ADAMTS19-AS1,ADAMTS3,ADAMTS9-AS1,ADAMTSL5,ADCY5,ADGRF4,ADGRG2,ADH1A,ADH1B,ADIPOQ,ADORA2B,AFAP1-AS1,AKAP14,AKR1B10,ALDH1L1-AS2,ALK,AMBP,AMER1,AMER3,AMMECR1LP1,ANAPC1P1,ANKRD20A11P,ANKRD30A,ANKRD30BL,ANKRD34C,ANKRD35,ANKRD36BP2,ANKRD62P1,ANKS6,ANXA9,AOX2P,APCDD1L,APOBEC3B,APOBEC4,APOD,AQP10,AQP7P1,AR,ARHGAP31-AS1,ARHGAP40…	R-HSA-983695	Antigen activates B Cell Receptor (BCR) leading to generation of second messengers	6.06296e-05
BRCA	,AADACP1,ABAT,ABCA13,ABCA8,ABCC13,ACER2,ACKR1,ACMSD,ACSL6,ACTG2,ADAM20,ADAM33,ADAMTS19-AS1,ADAMTS3,ADAMTS9-AS1,ADAMTSL5,ADCY5,ADGRF4,ADGRG2,ADH1A,ADH1B,ADIPOQ,ADORA2B,AFAP1-AS1,AKAP14,AKR1B10,ALDH1L1-AS2,ALK,AMBP,AMER1,AMER3,AMMECR1LP1,ANAPC1P1,ANKRD20A11P,ANKRD30A,ANKRD30BL,ANKRD34C,ANKRD35,ANKRD36BP2,ANKRD62P1,ANKS6,ANXA9,AOX2P,APCDD1L,APOBEC3B,APOBEC4,APOD,AQP10,AQP7P1,AR,ARHGAP31-AS1,ARHGAP40…	R-HSA-2029480	Fcgamma receptor (FCGR) dependent phagocytosis	8.44203e-05
BRCA	,AADACP1,ABAT,ABCA13,ABCA8,ABCC13,ACER2,ACKR1,ACMSD,ACSL6,ACTG2,ADAM20,ADAM33,ADAMTS19-AS1,ADAMTS3,ADAMTS9-AS1,ADAMTSL5,ADCY5,ADGRF4,ADGRG2,ADH1A,ADH1B,ADIPOQ,ADORA2B,AFAP1-AS1,AKAP14,AKR1B10,ALDH1L1-AS2,ALK,AMBP,AMER1,AMER3,AMMECR1LP1,ANAPC1P1,ANKRD20A11P,ANKRD30A,ANKRD30BL,ANKRD34C,ANKRD35,ANKRD36BP2,ANKRD62P1,ANKS6,ANXA9,AOX2P,APCDD1L,APOBEC3B,APOBEC4,APOD,AQP10,AQP7P1,AR,ARHGAP31-AS1,ARHGAP40…	R-HSA-2454202	Fc epsilon receptor (FCERI) signaling	9.2334e-05
BRCA	,AADACP1,ABAT,ABCA13,ABCA8,ABCC13,ACER2,ACKR1,ACMSD,ACSL6,ACTG2,ADAM20,ADAM33,ADAMTS19-AS1,ADAMTS3,ADAMTS9-AS1,ADAMTSL5,ADCY5,ADGRF4,ADGRG2,ADH1A,ADH1B,ADIPOQ,ADORA2B,AFAP1-AS1,AKAP14,AKR1B10,ALDH1L1-AS2,ALK,AMBP,AMER1,AMER3,AMMECR1LP1,ANAPC1P1,ANKRD20A11P,ANKRD30A,ANKRD30BL,ANKRD34C,ANKRD35,ANKRD36BP2,ANKRD62P1,ANKS6,ANXA9,AOX2P,APCDD1L,APOBEC3B,APOBEC4,APOD,AQP10,AQP7P1,AR,ARHGAP31-AS1,ARHGAP40…	R-HSA-983705	Signaling by the B Cell Receptor (BCR)	0.000128291
BRCA	,AADACP1,ABAT,ABCA13,ABCA8,ABCC13,ACER2,ACKR1,ACMSD,ACSL6,ACTG2,ADAM20,ADAM33,ADAMTS19-AS1,ADAMTS3,ADAMTS9-AS1,ADAMTSL5,ADCY5,ADGRF4,ADGRG2,ADH1A,ADH1B,ADIPOQ,ADORA2B,AFAP1-AS1,AKAP14,AKR1B10,ALDH1L1-AS2,ALK,AMBP,AMER1,AMER3,AMMECR1LP1,ANAPC1P1,ANKRD20A11P,ANKRD30A,ANKRD30BL,ANKRD34C,ANKRD35,ANKRD36BP2,ANKRD62P1,ANKS6,ANXA9,AOX2P,APCDD1L,APOBEC3B,APOBEC4,APOD,AQP10,AQP7P1,AR,ARHGAP31-AS1,ARHGAP40…	R-HSA-2871809	FCERI mediated Ca+2 mobilization	0.000171699
BRCA	,AADACP1,ABAT,ABCA13,ABCA8,ABCC13,ACER2,ACKR1,ACMSD,ACSL6,ACTG2,ADAM20,ADAM33,ADAMTS19-AS1,ADAMTS3,ADAMTS9-AS1,ADAMTSL5,ADCY5,ADGRF4,ADGRG2,ADH1A,ADH1B,ADIPOQ,ADORA2B,AFAP1-AS1,AKAP14,AKR1B10,ALDH1L1-AS2,ALK,AMBP,AMER1,AMER3,AMMECR1LP1,ANAPC1P1,ANKRD20A11P,ANKRD30A,ANKRD30BL,ANKRD34C,ANKRD35,ANKRD36BP2,ANKRD62P1,ANKS6,ANXA9,AOX2P,APCDD1L,APOBEC3B,APOBEC4,APOD,AQP10,AQP7P1,AR,ARHGAP31-AS1,ARHGAP40…	R-HSA-2871796	FCERI mediated MAPK activation	0.000186146
BRCA	,AADACP1,ABAT,ABCA13,ABCA8,ABCC13,ACER2,ACKR1,ACMSD,ACSL6,ACTG2,ADAM20,ADAM33,ADAMTS19-AS1,ADAMTS3,ADAMTS9-AS1,ADAMTSL5,ADCY5,ADGRF4,ADGRG2,ADH1A,ADH1B,ADIPOQ,ADORA2B,AFAP1-AS1,AKAP14,AKR1B10,ALDH1L1-AS2,ALK,AMBP,AMER1,AMER3,AMMECR1LP1,ANAPC1P1,ANKRD20A11P,ANKRD30A,ANKRD30BL,ANKRD34C,ANKRD35,ANKRD36BP2,ANKRD62P1,ANKS6,ANXA9,AOX2P,APCDD1L,APOBEC3B,APOBEC4,APOD,AQP10,AQP7P1,AR,ARHGAP31-AS1,ARHGAP40…	R-HSA-202733	Cell surface interactions at the vascular wall	0.000261245
BRCA	,AADACP1,ABAT,ABCA13,ABCA8,ABCC13,ACER2,ACKR1,ACMSD,ACSL6,ACTG2,ADAM20,ADAM33,ADAMTS19-AS1,ADAMTS3,ADAMTS9-AS1,ADAMTSL5,ADCY5,ADGRF4,ADGRG2,ADH1A,ADH1B,ADIPOQ,ADORA2B,AFAP1-AS1,AKAP14,AKR1B10,ALDH1L1-AS2,ALK,AMBP,AMER1,AMER3,AMMECR1LP1,ANAPC1P1,ANKRD20A11P,ANKRD30A,ANKRD30BL,ANKRD34C,ANKRD35,ANKRD36BP2,ANKRD62P1,ANKS6,ANXA9,AOX2P,APCDD1L,APOBEC3B,APOBEC4,APOD,AQP10,AQP7P1,AR,ARHGAP31-AS1,ARHGAP40…	R-HSA-380108	Chemokine receptors bind chemokines	0.000357171
BRCA	,AADACP1,ABAT,ABCA13,ABCA8,ABCC13,ACER2,ACKR1,ACMSD,ACSL6,ACTG2,ADAM20,ADAM33,ADAMTS19-AS1,ADAMTS3,ADAMTS9-AS1,ADAMTSL5,ADCY5,ADGRF4,ADGRG2,ADH1A,ADH1B,ADIPOQ,ADORA2B,AFAP1-AS1,AKAP14,AKR1B10,ALDH1L1-AS2,ALK,AMBP,AMER1,AMER3,AMMECR1LP1,ANAPC1P1,ANKRD20A11P,ANKRD30A,ANKRD30BL,ANKRD34C,ANKRD35,ANKRD36BP2,ANKRD62P1,ANKS6,ANXA9,AOX2P,APCDD1L,APOBEC3B,APOBEC4,APOD,AQP10,AQP7P1,AR,ARHGAP31-AS1,ARHGAP40…	R-HSA-1266738	Developmental Biology	0.00052023
BRCA	,AADACP1,ABAT,ABCA13,ABCA8,ABCC13,ACER2,ACKR1,ACMSD,ACSL6,ACTG2,ADAM20,ADAM33,ADAMTS19-AS1,ADAMTS3,ADAMTS9-AS1,ADAMTSL5,ADCY5,ADGRF4,ADGRG2,ADH1A,ADH1B,ADIPOQ,ADORA2B,AFAP1-AS1,AKAP14,AKR1B10,ALDH1L1-AS2,ALK,AMBP,AMER1,AMER3,AMMECR1LP1,ANAPC1P1,ANKRD20A11P,ANKRD30A,ANKRD30BL,ANKRD34C,ANKRD35,ANKRD36BP2,ANKRD62P1,ANKS6,ANXA9,AOX2P,APCDD1L,APOBEC3B,APOBEC4,APOD,AQP10,AQP7P1,AR,ARHGAP31-AS1,ARHGAP40…	R-HSA-112315	Transmission across Chemical Synapses	0.000665816
BRCA	,AADACP1,ABAT,ABCA13,ABCA8,ABCC13,ACER2,ACKR1,ACMSD,ACSL6,ACTG2,ADAM20,ADAM33,ADAMTS19-AS1,ADAMTS3,ADAMTS9-AS1,ADAMTSL5,ADCY5,ADGRF4,ADGRG2,ADH1A,ADH1B,ADIPOQ,ADORA2B,AFAP1-AS1,AKAP14,AKR1B10,ALDH1L1-AS2,ALK,AMBP,AMER1,AMER3,AMMECR1LP1,ANAPC1P1,ANKRD20A11P,ANKRD30A,ANKRD30BL,ANKRD34C,ANKRD35,ANKRD36BP2,ANKRD62P1,ANKS6,ANXA9,AOX2P,APCDD1L,APOBEC3B,APOBEC4,APOD,AQP10,AQP7P1,AR,ARHGAP31-AS1,ARHGAP40…	R-HSA-163125	Post-translational modification: synthesis of GPI-anchored proteins	0.000833156
BRCA	,AADACP1,ABAT,ABCA13,ABCA8,ABCC13,ACER2,ACKR1,ACMSD,ACSL6,ACTG2,ADAM20,ADAM33,ADAMTS19-AS1,ADAMTS3,ADAMTS9-AS1,ADAMTSL5,ADCY5,ADGRF4,ADGRG2,ADH1A,ADH1B,ADIPOQ,ADORA2B,AFAP1-AS1,AKAP14,AKR1B10,ALDH1L1-AS2,ALK,AMBP,AMER1,AMER3,AMMECR1LP1,ANAPC1P1,ANKRD20A11P,ANKRD30A,ANKRD30BL,ANKRD34C,ANKRD35,ANKRD36BP2,ANKRD62P1,ANKS6,ANXA9,AOX2P,APCDD1L,APOBEC3B,APOBEC4,APOD,AQP10,AQP7P1,AR,ARHGAP31-AS1,ARHGAP40…	R-HSA-1296071	Potassium Channels	0.0012426
BRCA	,AADACP1,ABAT,ABCA13,ABCA8,ABCC13,ACER2,ACKR1,ACMSD,ACSL6,ACTG2,ADAM20,ADAM33,ADAMTS19-AS1,ADAMTS3,ADAMTS9-AS1,ADAMTSL5,ADCY5,ADGRF4,ADGRG2,ADH1A,ADH1B,ADIPOQ,ADORA2B,AFAP1-AS1,AKAP14,AKR1B10,ALDH1L1-AS2,ALK,AMBP,AMER1,AMER3,AMMECR1LP1,ANAPC1P1,ANKRD20A11P,ANKRD30A,ANKRD30BL,ANKRD34C,ANKRD35,ANKRD36BP2,ANKRD62P1,ANKS6,ANXA9,AOX2P,APCDD1L,APOBEC3B,APOBEC4,APOD,AQP10,AQP7P1,AR,ARHGAP31-AS1,ARHGAP40…	R-HSA-1296072	Voltage gated Potassium channels	0.00128705
BRCA	,AADACP1,ABAT,ABCA13,ABCA8,ABCC13,ACER2,ACKR1,ACMSD,ACSL6,ACTG2,ADAM20,ADAM33,ADAMTS19-AS1,ADAMTS3,ADAMTS9-AS1,ADAMTSL5,ADCY5,ADGRF4,ADGRG2,ADH1A,ADH1B,ADIPOQ,ADORA2B,AFAP1-AS1,AKAP14,AKR1B10,ALDH1L1-AS2,ALK,AMBP,AMER1,AMER3,AMMECR1LP1,ANAPC1P1,ANKRD20A11P,ANKRD30A,ANKRD30BL,ANKRD34C,ANKRD35,ANKRD36BP2,ANKRD62P1,ANKS6,ANXA9,AOX2P,APCDD1L,APOBEC3B,APOBEC4,APOD,AQP10,AQP7P1,AR,ARHGAP31-AS1,ARHGAP40…	R-HSA-211859	Biological oxidations	0.00133832
BRCA	,AADACP1,ABAT,ABCA13,ABCA8,ABCC13,ACER2,ACKR1,ACMSD,ACSL6,ACTG2,ADAM20,ADAM33,ADAMTS19-AS1,ADAMTS3,ADAMTS9-AS1,ADAMTSL5,ADCY5,ADGRF4,ADGRG2,ADH1A,ADH1B,ADIPOQ,ADORA2B,AFAP1-AS1,AKAP14,AKR1B10,ALDH1L1-AS2,ALK,AMBP,AMER1,AMER3,AMMECR1LP1,ANAPC1P1,ANKRD20A11P,ANKRD30A,ANKRD30BL,ANKRD34C,ANKRD35,ANKRD36BP2,ANKRD62P1,ANKS6,ANXA9,AOX2P,APCDD1L,APOBEC3B,APOBEC4,APOD,AQP10,AQP7P1,AR,ARHGAP31-AS1,ARHGAP40…	R-HSA-211979	Eicosanoids	0.00256593
BRCA	,AADACP1,ABAT,ABCA13,ABCA8,ABCC13,ACER2,ACKR1,ACMSD,ACSL6,ACTG2,ADAM20,ADAM33,ADAMTS19-AS1,ADAMTS3,ADAMTS9-AS1,ADAMTSL5,ADCY5,ADGRF4,ADGRG2,ADH1A,ADH1B,ADIPOQ,ADORA2B,AFAP1-AS1,AKAP14,AKR1B10,ALDH1L1-AS2,ALK,AMBP,AMER1,AMER3,AMMECR1LP1,ANAPC1P1,ANKRD20A11P,ANKRD30A,ANKRD30BL,ANKRD34C,ANKRD35,ANKRD36BP2,ANKRD62P1,ANKS6,ANXA9,AOX2P,APCDD1L,APOBEC3B,APOBEC4,APOD,AQP10,AQP7P1,AR,ARHGAP31-AS1,ARHGAP40…	R-HSA-556833	Metabolism of lipids	0.00444662
BRCA	,AADACP1,ABAT,ABCA13,ABCA8,ABCC13,ACER2,ACKR1,ACMSD,ACSL6,ACTG2,ADAM20,ADAM33,ADAMTS19-AS1,ADAMTS3,ADAMTS9-AS1,ADAMTSL5,ADCY5,ADGRF4,ADGRG2,ADH1A,ADH1B,ADIPOQ,ADORA2B,AFAP1-AS1,AKAP14,AKR1B10,ALDH1L1-AS2,ALK,AMBP,AMER1,AMER3,AMMECR1LP1,ANAPC1P1,ANKRD20A11P,ANKRD30A,ANKRD30BL,ANKRD34C,ANKRD35,ANKRD36BP2,ANKRD62P1,ANKS6,ANXA9,AOX2P,APCDD1L,APOBEC3B,APOBEC4,APOD,AQP10,AQP7P1,AR,ARHGAP31-AS1,ARHGAP40…	R-HSA-6798695	Neutrophil degranulation	0.00474893
BRCA	,AADACP1,ABAT,ABCA13,ABCA8,ABCC13,ACER2,ACKR1,ACMSD,ACSL6,ACTG2,ADAM20,ADAM33,ADAMTS19-AS1,ADAMTS3,ADAMTS9-AS1,ADAMTSL5,ADCY5,ADGRF4,ADGRG2,ADH1A,ADH1B,ADIPOQ,ADORA2B,AFAP1-AS1,AKAP14,AKR1B10,ALDH1L1-AS2,ALK,AMBP,AMER1,AMER3,AMMECR1LP1,ANAPC1P1,ANKRD20A11P,ANKRD30A,ANKRD30BL,ANKRD34C,ANKRD35,ANKRD36BP2,ANKRD62P1,ANKS6,ANXA9,AOX2P,APCDD1L,APOBEC3B,APOBEC4,APOD,AQP10,AQP7P1,AR,ARHGAP31-AS1,ARHGAP40…	R-HSA-397014	Muscle contraction	0.00497001
BRCA	,AADACP1,ABAT,ABCA13,ABCA8,ABCC13,ACER2,ACKR1,ACMSD,ACSL6,ACTG2,ADAM20,ADAM33,ADAMTS19-AS1,ADAMTS3,ADAMTS9-AS1,ADAMTSL5,ADCY5,ADGRF4,ADGRG2,ADH1A,ADH1B,ADIPOQ,ADORA2B,AFAP1-AS1,AKAP14,AKR1B10,ALDH1L1-AS2,ALK,AMBP,AMER1,AMER3,AMMECR1LP1,ANAPC1P1,ANKRD20A11P,ANKRD30A,ANKRD30BL,ANKRD34C,ANKRD35,ANKRD36BP2,ANKRD62P1,ANKS6,ANXA9,AOX2P,APCDD1L,APOBEC3B,APOBEC4,APOD,AQP10,AQP7P1,AR,ARHGAP31-AS1,ARHGAP40…	R-HSA-211935	Fatty acids	0.00695821
BRCA	,AADACP1,ABAT,ABCA13,ABCA8,ABCC13,ACER2,ACKR1,ACMSD,ACSL6,ACTG2,ADAM20,ADAM33,ADAMTS19-AS1,ADAMTS3,ADAMTS9-AS1,ADAMTSL5,ADCY5,ADGRF4,ADGRG2,ADH1A,ADH1B,ADIPOQ,ADORA2B,AFAP1-AS1,AKAP14,AKR1B10,ALDH1L1-AS2,ALK,AMBP,AMER1,AMER3,AMMECR1LP1,ANAPC1P1,ANKRD20A11P,ANKRD30A,ANKRD30BL,ANKRD34C,ANKRD35,ANKRD36BP2,ANKRD62P1,ANKS6,ANXA9,AOX2P,APCDD1L,APOBEC3B,APOBEC4,APOD,AQP10,AQP7P1,AR,ARHGAP31-AS1,ARHGAP40…	R-HSA-71291	Metabolism of amino acids and derivatives	0.00798641
BRCA	,AADACP1,ABAT,ABCA13,ABCA8,ABCC13,ACER2,ACKR1,ACMSD,ACSL6,ACTG2,ADAM20,ADAM33,ADAMTS19-AS1,ADAMTS3,ADAMTS9-AS1,ADAMTSL5,ADCY5,ADGRF4,ADGRG2,ADH1A,ADH1B,ADIPOQ,ADORA2B,AFAP1-AS1,AKAP14,AKR1B10,ALDH1L1-AS2,ALK,AMBP,AMER1,AMER3,AMMECR1LP1,ANAPC1P1,ANKRD20A11P,ANKRD30A,ANKRD30BL,ANKRD34C,ANKRD35,ANKRD36BP2,ANKRD62P1,ANKS6,ANXA9,AOX2P,APCDD1L,APOBEC3B,APOBEC4,APOD,AQP10,AQP7P1,AR,ARHGAP31-AS1,ARHGAP40…	R-HSA-416476	G alpha (q) signalling events	0.00934469
BRCA	,AADACP1,ABAT,ABCA13,ABCA8,ABCC13,ACER2,ACKR1,ACMSD,ACSL6,ACTG2,ADAM20,ADAM33,ADAMTS19-AS1,ADAMTS3,ADAMTS9-AS1,ADAMTSL5,ADCY5,ADGRF4,ADGRG2,ADH1A,ADH1B,ADIPOQ,ADORA2B,AFAP1-AS1,AKAP14,AKR1B10,ALDH1L1-AS2,ALK,AMBP,AMER1,AMER3,AMMECR1LP1,ANAPC1P1,ANKRD20A11P,ANKRD30A,ANKRD30BL,ANKRD34C,ANKRD35,ANKRD36BP2,ANKRD62P1,ANKS6,ANXA9,AOX2P,APCDD1L,APOBEC3B,APOBEC4,APOD,AQP10,AQP7P1,AR,ARHGAP31-AS1,ARHGAP40…	R-HSA-69620	Cell Cycle Checkpoints	0.0107196
BRCA	,AADACP1,ABAT,ABCA13,ABCA8,ABCC13,ACER2,ACKR1,ACMSD,ACSL6,ACTG2,ADAM20,ADAM33,ADAMTS19-AS1,ADAMTS3,ADAMTS9-AS1,ADAMTSL5,ADCY5,ADGRF4,ADGRG2,ADH1A,ADH1B,ADIPOQ,ADORA2B,AFAP1-AS1,AKAP14,AKR1B10,ALDH1L1-AS2,ALK,AMBP,AMER1,AMER3,AMMECR1LP1,ANAPC1P1,ANKRD20A11P,ANKRD30A,ANKRD30BL,ANKRD34C,ANKRD35,ANKRD36BP2,ANKRD62P1,ANKS6,ANXA9,AOX2P,APCDD1L,APOBEC3B,APOBEC4,APOD,AQP10,AQP7P1,AR,ARHGAP31-AS1,ARHGAP40…	R-HSA-5576891	Cardiac conduction	0.0143677
BRCA	,AADACP1,ABAT,ABCA13,ABCA8,ABCC13,ACER2,ACKR1,ACMSD,ACSL6,ACTG2,ADAM20,ADAM33,ADAMTS19-AS1,ADAMTS3,ADAMTS9-AS1,ADAMTSL5,ADCY5,ADGRF4,ADGRG2,ADH1A,ADH1B,ADIPOQ,ADORA2B,AFAP1-AS1,AKAP14,AKR1B10,ALDH1L1-AS2,ALK,AMBP,AMER1,AMER3,AMMECR1LP1,ANAPC1P1,ANKRD20A11P,ANKRD30A,ANKRD30BL,ANKRD34C,ANKRD35,ANKRD36BP2,ANKRD62P1,ANKS6,ANXA9,AOX2P,APCDD1L,APOBEC3B,APOBEC4,APOD,AQP10,AQP7P1,AR,ARHGAP31-AS1,ARHGAP40…	R-HSA-211945	Phase I - Functionalization of compounds	0.0229933
BRCA	,AADACP1,ABAT,ABCA13,ABCA8,ABCC13,ACER2,ACKR1,ACMSD,ACSL6,ACTG2,ADAM20,ADAM33,ADAMTS19-AS1,ADAMTS3,ADAMTS9-AS1,ADAMTSL5,ADCY5,ADGRF4,ADGRG2,ADH1A,ADH1B,ADIPOQ,ADORA2B,AFAP1-AS1,AKAP14,AKR1B10,ALDH1L1-AS2,ALK,AMBP,AMER1,AMER3,AMMECR1LP1,ANAPC1P1,ANKRD20A11P,ANKRD30A,ANKRD30BL,ANKRD34C,ANKRD35,ANKRD36BP2,ANKRD62P1,ANKS6,ANXA9,AOX2P,APCDD1L,APOBEC3B,APOBEC4,APOD,AQP10,AQP7P1,AR,ARHGAP31-AS1,ARHGAP40…	R-HSA-5173105	O-linked glycosylation	0.0393688
CESC	ACOX2,ACTBL2,ACTG2,ADAMTS19,ADAMTS19-AS1,ADGRE1,ADH1A,ADH7,AKR1C2,ALDH1A2,ALDH3A1,ALPG,ALPK2,ANKRD40CL,ANO5,APLN,ARHGAP27P2,ASCL4,ATOH7,ATP5PBP5,AXIN2,B3GALT2,B4GALNT4,BASP1-AS1,BNC2-AS1,BVES-AS1,C10orf90,C11orf86,C1QTNF7,C4orf48,C4orf54,C5AR2,C6orf118,C9orf24,CACNB2,CAPN9,CARM1P1,CASP5,CCBE1,CCDC114,CCDC173,CCDC187,CCK,CCL14,CCL18,CCL19,CCL23,CDH15,CDK5R2,CDX1,CFAP45,CHORDC2P,CLDN10,CLDN3,CLRN3,…	R-HSA-500792	GPCR ligand binding	8.72799e-16
CESC	ACOX2,ACTBL2,ACTG2,ADAMTS19,ADAMTS19-AS1,ADGRE1,ADH1A,ADH7,AKR1C2,ALDH1A2,ALDH3A1,ALPG,ALPK2,ANKRD40CL,ANO5,APLN,ARHGAP27P2,ASCL4,ATOH7,ATP5PBP5,AXIN2,B3GALT2,B4GALNT4,BASP1-AS1,BNC2-AS1,BVES-AS1,C10orf90,C11orf86,C1QTNF7,C4orf48,C4orf54,C5AR2,C6orf118,C9orf24,CACNB2,CAPN9,CARM1P1,CASP5,CCBE1,CCDC114,CCDC173,CCDC187,CCK,CCL14,CCL18,CCL19,CCL23,CDH15,CDK5R2,CDX1,CFAP45,CHORDC2P,CLDN10,CLDN3,CLRN3,…	R-HSA-162582	Signal Transduction	5.68375e-12
CESC	ACOX2,ACTBL2,ACTG2,ADAMTS19,ADAMTS19-AS1,ADGRE1,ADH1A,ADH7,AKR1C2,ALDH1A2,ALDH3A1,ALPG,ALPK2,ANKRD40CL,ANO5,APLN,ARHGAP27P2,ASCL4,ATOH7,ATP5PBP5,AXIN2,B3GALT2,B4GALNT4,BASP1-AS1,BNC2-AS1,BVES-AS1,C10orf90,C11orf86,C1QTNF7,C4orf48,C4orf54,C5AR2,C6orf118,C9orf24,CACNB2,CAPN9,CARM1P1,CASP5,CCBE1,CCDC114,CCDC173,CCDC187,CCK,CCL14,CCL18,CCL19,CCL23,CDH15,CDK5R2,CDX1,CFAP45,CHORDC2P,CLDN10,CLDN3,CLRN3,…	R-HSA-372790	Signaling by GPCR	1.17974e-11
CESC	ACOX2,ACTBL2,ACTG2,ADAMTS19,ADAMTS19-AS1,ADGRE1,ADH1A,ADH7,AKR1C2,ALDH1A2,ALDH3A1,ALPG,ALPK2,ANKRD40CL,ANO5,APLN,ARHGAP27P2,ASCL4,ATOH7,ATP5PBP5,AXIN2,B3GALT2,B4GALNT4,BASP1-AS1,BNC2-AS1,BVES-AS1,C10orf90,C11orf86,C1QTNF7,C4orf48,C4orf54,C5AR2,C6orf118,C9orf24,CACNB2,CAPN9,CARM1P1,CASP5,CCBE1,CCDC114,CCDC173,CCDC187,CCK,CCL14,CCL18,CCL19,CCL23,CDH15,CDK5R2,CDX1,CFAP45,CHORDC2P,CLDN10,CLDN3,CLRN3,…	R-HSA-388396	GPCR downstream signalling	6.81362e-08
CESC	ACOX2,ACTBL2,ACTG2,ADAMTS19,ADAMTS19-AS1,ADGRE1,ADH1A,ADH7,AKR1C2,ALDH1A2,ALDH3A1,ALPG,ALPK2,ANKRD40CL,ANO5,APLN,ARHGAP27P2,ASCL4,ATOH7,ATP5PBP5,AXIN2,B3GALT2,B4GALNT4,BASP1-AS1,BNC2-AS1,BVES-AS1,C10orf90,C11orf86,C1QTNF7,C4orf48,C4orf54,C5AR2,C6orf118,C9orf24,CACNB2,CAPN9,CARM1P1,CASP5,CCBE1,CCDC114,CCDC173,CCDC187,CCK,CCL14,CCL18,CCL19,CCL23,CDH15,CDK5R2,CDX1,CFAP45,CHORDC2P,CLDN10,CLDN3,CLRN3,…	R-HSA-418594	G alpha (i) signalling events	1.55834e-07
CESC	ACOX2,ACTBL2,ACTG2,ADAMTS19,ADAMTS19-AS1,ADGRE1,ADH1A,ADH7,AKR1C2,ALDH1A2,ALDH3A1,ALPG,ALPK2,ANKRD40CL,ANO5,APLN,ARHGAP27P2,ASCL4,ATOH7,ATP5PBP5,AXIN2,B3GALT2,B4GALNT4,BASP1-AS1,BNC2-AS1,BVES-AS1,C10orf90,C11orf86,C1QTNF7,C4orf48,C4orf54,C5AR2,C6orf118,C9orf24,CACNB2,CAPN9,CARM1P1,CASP5,CCBE1,CCDC114,CCDC173,CCDC187,CCK,CCL14,CCL18,CCL19,CCL23,CDH15,CDK5R2,CDX1,CFAP45,CHORDC2P,CLDN10,CLDN3,CLRN3,…	R-HSA-373076	Class A/1 (Rhodopsin-like receptors)	1.74474e-07
CESC	ACOX2,ACTBL2,ACTG2,ADAMTS19,ADAMTS19-AS1,ADGRE1,ADH1A,ADH7,AKR1C2,ALDH1A2,ALDH3A1,ALPG,ALPK2,ANKRD40CL,ANO5,APLN,ARHGAP27P2,ASCL4,ATOH7,ATP5PBP5,AXIN2,B3GALT2,B4GALNT4,BASP1-AS1,BNC2-AS1,BVES-AS1,C10orf90,C11orf86,C1QTNF7,C4orf48,C4orf54,C5AR2,C6orf118,C9orf24,CACNB2,CAPN9,CARM1P1,CASP5,CCBE1,CCDC114,CCDC173,CCDC187,CCK,CCL14,CCL18,CCL19,CCL23,CDH15,CDK5R2,CDX1,CFAP45,CHORDC2P,CLDN10,CLDN3,CLRN3,…	R-HSA-1430728	Metabolism	6.78399e-07
CESC	ACOX2,ACTBL2,ACTG2,ADAMTS19,ADAMTS19-AS1,ADGRE1,ADH1A,ADH7,AKR1C2,ALDH1A2,ALDH3A1,ALPG,ALPK2,ANKRD40CL,ANO5,APLN,ARHGAP27P2,ASCL4,ATOH7,ATP5PBP5,AXIN2,B3GALT2,B4GALNT4,BASP1-AS1,BNC2-AS1,BVES-AS1,C10orf90,C11orf86,C1QTNF7,C4orf48,C4orf54,C5AR2,C6orf118,C9orf24,CACNB2,CAPN9,CARM1P1,CASP5,CCBE1,CCDC114,CCDC173,CCDC187,CCK,CCL14,CCL18,CCL19,CCL23,CDH15,CDK5R2,CDX1,CFAP45,CHORDC2P,CLDN10,CLDN3,CLRN3,…	R-HSA-375276	Peptide ligand-binding receptors	2.31235e-06
CESC	ACOX2,ACTBL2,ACTG2,ADAMTS19,ADAMTS19-AS1,ADGRE1,ADH1A,ADH7,AKR1C2,ALDH1A2,ALDH3A1,ALPG,ALPK2,ANKRD40CL,ANO5,APLN,ARHGAP27P2,ASCL4,ATOH7,ATP5PBP5,AXIN2,B3GALT2,B4GALNT4,BASP1-AS1,BNC2-AS1,BVES-AS1,C10orf90,C11orf86,C1QTNF7,C4orf48,C4orf54,C5AR2,C6orf118,C9orf24,CACNB2,CAPN9,CARM1P1,CASP5,CCBE1,CCDC114,CCDC173,CCDC187,CCK,CCL14,CCL18,CCL19,CCL23,CDH15,CDK5R2,CDX1,CFAP45,CHORDC2P,CLDN10,CLDN3,CLRN3,…	R-HSA-373080	Class B/2 (Secretin family receptors)	5.33304e-05
CESC	ACOX2,ACTBL2,ACTG2,ADAMTS19,ADAMTS19-AS1,ADGRE1,ADH1A,ADH7,AKR1C2,ALDH1A2,ALDH3A1,ALPG,ALPK2,ANKRD40CL,ANO5,APLN,ARHGAP27P2,ASCL4,ATOH7,ATP5PBP5,AXIN2,B3GALT2,B4GALNT4,BASP1-AS1,BNC2-AS1,BVES-AS1,C10orf90,C11orf86,C1QTNF7,C4orf48,C4orf54,C5AR2,C6orf118,C9orf24,CACNB2,CAPN9,CARM1P1,CASP5,CCBE1,CCDC114,CCDC173,CCDC187,CCK,CCL14,CCL18,CCL19,CCL23,CDH15,CDK5R2,CDX1,CFAP45,CHORDC2P,CLDN10,CLDN3,CLRN3,…	R-HSA-1266738	Developmental Biology	0.000160317
CESC	ACOX2,ACTBL2,ACTG2,ADAMTS19,ADAMTS19-AS1,ADGRE1,ADH1A,ADH7,AKR1C2,ALDH1A2,ALDH3A1,ALPG,ALPK2,ANKRD40CL,ANO5,APLN,ARHGAP27P2,ASCL4,ATOH7,ATP5PBP5,AXIN2,B3GALT2,B4GALNT4,BASP1-AS1,BNC2-AS1,BVES-AS1,C10orf90,C11orf86,C1QTNF7,C4orf48,C4orf54,C5AR2,C6orf118,C9orf24,CACNB2,CAPN9,CARM1P1,CASP5,CCBE1,CCDC114,CCDC173,CCDC187,CCK,CCL14,CCL18,CCL19,CCL23,CDH15,CDK5R2,CDX1,CFAP45,CHORDC2P,CLDN10,CLDN3,CLRN3,…	R-HSA-597592	Post-translational protein modification	0.000365965
CESC	ACOX2,ACTBL2,ACTG2,ADAMTS19,ADAMTS19-AS1,ADGRE1,ADH1A,ADH7,AKR1C2,ALDH1A2,ALDH3A1,ALPG,ALPK2,ANKRD40CL,ANO5,APLN,ARHGAP27P2,ASCL4,ATOH7,ATP5PBP5,AXIN2,B3GALT2,B4GALNT4,BASP1-AS1,BNC2-AS1,BVES-AS1,C10orf90,C11orf86,C1QTNF7,C4orf48,C4orf54,C5AR2,C6orf118,C9orf24,CACNB2,CAPN9,CARM1P1,CASP5,CCBE1,CCDC114,CCDC173,CCDC187,CCK,CCL14,CCL18,CCL19,CCL23,CDH15,CDK5R2,CDX1,CFAP45,CHORDC2P,CLDN10,CLDN3,CLRN3,…	R-HSA-397014	Muscle contraction	0.000771323
CESC	ACOX2,ACTBL2,ACTG2,ADAMTS19,ADAMTS19-AS1,ADGRE1,ADH1A,ADH7,AKR1C2,ALDH1A2,ALDH3A1,ALPG,ALPK2,ANKRD40CL,ANO5,APLN,ARHGAP27P2,ASCL4,ATOH7,ATP5PBP5,AXIN2,B3GALT2,B4GALNT4,BASP1-AS1,BNC2-AS1,BVES-AS1,C10orf90,C11orf86,C1QTNF7,C4orf48,C4orf54,C5AR2,C6orf118,C9orf24,CACNB2,CAPN9,CARM1P1,CASP5,CCBE1,CCDC114,CCDC173,CCDC187,CCK,CCL14,CCL18,CCL19,CCL23,CDH15,CDK5R2,CDX1,CFAP45,CHORDC2P,CLDN10,CLDN3,CLRN3,…	R-HSA-6805567	Keratinization	0.00123066
CESC	ACOX2,ACTBL2,ACTG2,ADAMTS19,ADAMTS19-AS1,ADGRE1,ADH1A,ADH7,AKR1C2,ALDH1A2,ALDH3A1,ALPG,ALPK2,ANKRD40CL,ANO5,APLN,ARHGAP27P2,ASCL4,ATOH7,ATP5PBP5,AXIN2,B3GALT2,B4GALNT4,BASP1-AS1,BNC2-AS1,BVES-AS1,C10orf90,C11orf86,C1QTNF7,C4orf48,C4orf54,C5AR2,C6orf118,C9orf24,CACNB2,CAPN9,CARM1P1,CASP5,CCBE1,CCDC114,CCDC173,CCDC187,CCK,CCL14,CCL18,CCL19,CCL23,CDH15,CDK5R2,CDX1,CFAP45,CHORDC2P,CLDN10,CLDN3,CLRN3,…	R-HSA-211859	Biological oxidations	0.00141222
CESC	ACOX2,ACTBL2,ACTG2,ADAMTS19,ADAMTS19-AS1,ADGRE1,ADH1A,ADH7,AKR1C2,ALDH1A2,ALDH3A1,ALPG,ALPK2,ANKRD40CL,ANO5,APLN,ARHGAP27P2,ASCL4,ATOH7,ATP5PBP5,AXIN2,B3GALT2,B4GALNT4,BASP1-AS1,BNC2-AS1,BVES-AS1,C10orf90,C11orf86,C1QTNF7,C4orf48,C4orf54,C5AR2,C6orf118,C9orf24,CACNB2,CAPN9,CARM1P1,CASP5,CCBE1,CCDC114,CCDC173,CCDC187,CCK,CCL14,CCL18,CCL19,CCL23,CDH15,CDK5R2,CDX1,CFAP45,CHORDC2P,CLDN10,CLDN3,CLRN3,…	R-HSA-8957275	Post-translational protein phosphorylation	0.00294095
CESC	ACOX2,ACTBL2,ACTG2,ADAMTS19,ADAMTS19-AS1,ADGRE1,ADH1A,ADH7,AKR1C2,ALDH1A2,ALDH3A1,ALPG,ALPK2,ANKRD40CL,ANO5,APLN,ARHGAP27P2,ASCL4,ATOH7,ATP5PBP5,AXIN2,B3GALT2,B4GALNT4,BASP1-AS1,BNC2-AS1,BVES-AS1,C10orf90,C11orf86,C1QTNF7,C4orf48,C4orf54,C5AR2,C6orf118,C9orf24,CACNB2,CAPN9,CARM1P1,CASP5,CCBE1,CCDC114,CCDC173,CCDC187,CCK,CCL14,CCL18,CCL19,CCL23,CDH15,CDK5R2,CDX1,CFAP45,CHORDC2P,CLDN10,CLDN3,CLRN3,…	R-HSA-392499	Metabolism of proteins	0.00544815
CESC	ACOX2,ACTBL2,ACTG2,ADAMTS19,ADAMTS19-AS1,ADGRE1,ADH1A,ADH7,AKR1C2,ALDH1A2,ALDH3A1,ALPG,ALPK2,ANKRD40CL,ANO5,APLN,ARHGAP27P2,ASCL4,ATOH7,ATP5PBP5,AXIN2,B3GALT2,B4GALNT4,BASP1-AS1,BNC2-AS1,BVES-AS1,C10orf90,C11orf86,C1QTNF7,C4orf48,C4orf54,C5AR2,C6orf118,C9orf24,CACNB2,CAPN9,CARM1P1,CASP5,CCBE1,CCDC114,CCDC173,CCDC187,CCK,CCL14,CCL18,CCL19,CCL23,CDH15,CDK5R2,CDX1,CFAP45,CHORDC2P,CLDN10,CLDN3,CLRN3,…	R-HSA-381426	Regulation of Insulin-like Growth Factor (IGF) transport and uptake by Insulin-like Growth Factor Binding Proteins (IGFBPs)	0.00694721
CESC	ACOX2,ACTBL2,ACTG2,ADAMTS19,ADAMTS19-AS1,ADGRE1,ADH1A,ADH7,AKR1C2,ALDH1A2,ALDH3A1,ALPG,ALPK2,ANKRD40CL,ANO5,APLN,ARHGAP27P2,ASCL4,ATOH7,ATP5PBP5,AXIN2,B3GALT2,B4GALNT4,BASP1-AS1,BNC2-AS1,BVES-AS1,C10orf90,C11orf86,C1QTNF7,C4orf48,C4orf54,C5AR2,C6orf118,C9orf24,CACNB2,CAPN9,CARM1P1,CASP5,CCBE1,CCDC114,CCDC173,CCDC187,CCK,CCL14,CCL18,CCL19,CCL23,CDH15,CDK5R2,CDX1,CFAP45,CHORDC2P,CLDN10,CLDN3,CLRN3,…	R-HSA-6809371	Formation of the cornified envelope	0.00985878
CESC	ACOX2,ACTBL2,ACTG2,ADAMTS19,ADAMTS19-AS1,ADGRE1,ADH1A,ADH7,AKR1C2,ALDH1A2,ALDH3A1,ALPG,ALPK2,ANKRD40CL,ANO5,APLN,ARHGAP27P2,ASCL4,ATOH7,ATP5PBP5,AXIN2,B3GALT2,B4GALNT4,BASP1-AS1,BNC2-AS1,BVES-AS1,C10orf90,C11orf86,C1QTNF7,C4orf48,C4orf54,C5AR2,C6orf118,C9orf24,CACNB2,CAPN9,CARM1P1,CASP5,CCBE1,CCDC114,CCDC173,CCDC187,CCK,CCL14,CCL18,CCL19,CCL23,CDH15,CDK5R2,CDX1,CFAP45,CHORDC2P,CLDN10,CLDN3,CLRN3,…	R-HSA-1474244	Extracellular matrix organization	0.012321
CESC	ACOX2,ACTBL2,ACTG2,ADAMTS19,ADAMTS19-AS1,ADGRE1,ADH1A,ADH7,AKR1C2,ALDH1A2,ALDH3A1,ALPG,ALPK2,ANKRD40CL,ANO5,APLN,ARHGAP27P2,ASCL4,ATOH7,ATP5PBP5,AXIN2,B3GALT2,B4GALNT4,BASP1-AS1,BNC2-AS1,BVES-AS1,C10orf90,C11orf86,C1QTNF7,C4orf48,C4orf54,C5AR2,C6orf118,C9orf24,CACNB2,CAPN9,CARM1P1,CASP5,CCBE1,CCDC114,CCDC173,CCDC187,CCK,CCL14,CCL18,CCL19,CCL23,CDH15,CDK5R2,CDX1,CFAP45,CHORDC2P,CLDN10,CLDN3,CLRN3,…	R-HSA-556833	Metabolism of lipids	0.0125388
CESC	ACOX2,ACTBL2,ACTG2,ADAMTS19,ADAMTS19-AS1,ADGRE1,ADH1A,ADH7,AKR1C2,ALDH1A2,ALDH3A1,ALPG,ALPK2,ANKRD40CL,ANO5,APLN,ARHGAP27P2,ASCL4,ATOH7,ATP5PBP5,AXIN2,B3GALT2,B4GALNT4,BASP1-AS1,BNC2-AS1,BVES-AS1,C10orf90,C11orf86,C1QTNF7,C4orf48,C4orf54,C5AR2,C6orf118,C9orf24,CACNB2,CAPN9,CARM1P1,CASP5,CCBE1,CCDC114,CCDC173,CCDC187,CCK,CCL14,CCL18,CCL19,CCL23,CDH15,CDK5R2,CDX1,CFAP45,CHORDC2P,CLDN10,CLDN3,CLRN3,…	R-HSA-8948216	Collagen chain trimerization	0.0269928
CESC	ACOX2,ACTBL2,ACTG2,ADAMTS19,ADAMTS19-AS1,ADGRE1,ADH1A,ADH7,AKR1C2,ALDH1A2,ALDH3A1,ALPG,ALPK2,ANKRD40CL,ANO5,APLN,ARHGAP27P2,ASCL4,ATOH7,ATP5PBP5,AXIN2,B3GALT2,B4GALNT4,BASP1-AS1,BNC2-AS1,BVES-AS1,C10orf90,C11orf86,C1QTNF7,C4orf48,C4orf54,C5AR2,C6orf118,C9orf24,CACNB2,CAPN9,CARM1P1,CASP5,CCBE1,CCDC114,CCDC173,CCDC187,CCK,CCL14,CCL18,CCL19,CCL23,CDH15,CDK5R2,CDX1,CFAP45,CHORDC2P,CLDN10,CLDN3,CLRN3,…	R-HSA-163125	Post-translational modification: synthesis of GPI-anchored proteins	0.0298551
DLBC	A4GNT,ACAN,ACTL10,ADAM29,ADARB1,ADH1C,AKR1B10,AKR7A3,ANKRD18A,ANTXR1,AQP4,ARMC12,ARRDC5,ATP4B,AZGP1,B3GNT3,BATF3,BPIFB1,C11orf96,C15orf48,C1orf116,C1orf210,C2CD4A,C2CD4B,C6orf58,C9orf152,CAPN13,CAPN8,CAPN9,CATSPERD,CBLC,CBLIF,CCDC187,CCDC78,CCL8,CCND2,CD1A,CD200R1,CDKN1A,CEACAM3,CHIA,CHST9,CLDN9,CLEC5A,CMPK2,CNIH3,CNTD2,CPA2,CRYBG2,CTSE,CXCL17,CXCR1,CXCR2,CYP1A2,CYP2B7P,DENND5B,DLG2,DNAI2,DPYSL4,…	R-HSA-168256	Immune System	1.51946e-11
DLBC	A4GNT,ACAN,ACTL10,ADAM29,ADARB1,ADH1C,AKR1B10,AKR7A3,ANKRD18A,ANTXR1,AQP4,ARMC12,ARRDC5,ATP4B,AZGP1,B3GNT3,BATF3,BPIFB1,C11orf96,C15orf48,C1orf116,C1orf210,C2CD4A,C2CD4B,C6orf58,C9orf152,CAPN13,CAPN8,CAPN9,CATSPERD,CBLC,CBLIF,CCDC187,CCDC78,CCL8,CCND2,CD1A,CD200R1,CDKN1A,CEACAM3,CHIA,CHST9,CLDN9,CLEC5A,CMPK2,CNIH3,CNTD2,CPA2,CRYBG2,CTSE,CXCL17,CXCR1,CXCR2,CYP1A2,CYP2B7P,DENND5B,DLG2,DNAI2,DPYSL4,…	R-HSA-382551	Transport of small molecules	2.85948e-07
DLBC	A4GNT,ACAN,ACTL10,ADAM29,ADARB1,ADH1C,AKR1B10,AKR7A3,ANKRD18A,ANTXR1,AQP4,ARMC12,ARRDC5,ATP4B,AZGP1,B3GNT3,BATF3,BPIFB1,C11orf96,C15orf48,C1orf116,C1orf210,C2CD4A,C2CD4B,C6orf58,C9orf152,CAPN13,CAPN8,CAPN9,CATSPERD,CBLC,CBLIF,CCDC187,CCDC78,CCL8,CCND2,CD1A,CD200R1,CDKN1A,CEACAM3,CHIA,CHST9,CLDN9,CLEC5A,CMPK2,CNIH3,CNTD2,CPA2,CRYBG2,CTSE,CXCL17,CXCR1,CXCR2,CYP1A2,CYP2B7P,DENND5B,DLG2,DNAI2,DPYSL4,…	R-HSA-392499	Metabolism of proteins	4.27324e-07
DLBC	A4GNT,ACAN,ACTL10,ADAM29,ADARB1,ADH1C,AKR1B10,AKR7A3,ANKRD18A,ANTXR1,AQP4,ARMC12,ARRDC5,ATP4B,AZGP1,B3GNT3,BATF3,BPIFB1,C11orf96,C15orf48,C1orf116,C1orf210,C2CD4A,C2CD4B,C6orf58,C9orf152,CAPN13,CAPN8,CAPN9,CATSPERD,CBLC,CBLIF,CCDC187,CCDC78,CCL8,CCND2,CD1A,CD200R1,CDKN1A,CEACAM3,CHIA,CHST9,CLDN9,CLEC5A,CMPK2,CNIH3,CNTD2,CPA2,CRYBG2,CTSE,CXCL17,CXCR1,CXCR2,CYP1A2,CYP2B7P,DENND5B,DLG2,DNAI2,DPYSL4,…	R-HSA-913709	O-linked glycosylation of mucins	1.03774e-06
DLBC	A4GNT,ACAN,ACTL10,ADAM29,ADARB1,ADH1C,AKR1B10,AKR7A3,ANKRD18A,ANTXR1,AQP4,ARMC12,ARRDC5,ATP4B,AZGP1,B3GNT3,BATF3,BPIFB1,C11orf96,C15orf48,C1orf116,C1orf210,C2CD4A,C2CD4B,C6orf58,C9orf152,CAPN13,CAPN8,CAPN9,CATSPERD,CBLC,CBLIF,CCDC187,CCDC78,CCL8,CCND2,CD1A,CD200R1,CDKN1A,CEACAM3,CHIA,CHST9,CLDN9,CLEC5A,CMPK2,CNIH3,CNTD2,CPA2,CRYBG2,CTSE,CXCL17,CXCR1,CXCR2,CYP1A2,CYP2B7P,DENND5B,DLG2,DNAI2,DPYSL4,…	R-HSA-162582	Signal Transduction	3.58776e-06
DLBC	A4GNT,ACAN,ACTL10,ADAM29,ADARB1,ADH1C,AKR1B10,AKR7A3,ANKRD18A,ANTXR1,AQP4,ARMC12,ARRDC5,ATP4B,AZGP1,B3GNT3,BATF3,BPIFB1,C11orf96,C15orf48,C1orf116,C1orf210,C2CD4A,C2CD4B,C6orf58,C9orf152,CAPN13,CAPN8,CAPN9,CATSPERD,CBLC,CBLIF,CCDC187,CCDC78,CCL8,CCND2,CD1A,CD200R1,CDKN1A,CEACAM3,CHIA,CHST9,CLDN9,CLEC5A,CMPK2,CNIH3,CNTD2,CPA2,CRYBG2,CTSE,CXCL17,CXCR1,CXCR2,CYP1A2,CYP2B7P,DENND5B,DLG2,DNAI2,DPYSL4,…	R-HSA-1296071	Potassium Channels	2.05781e-05
DLBC	A4GNT,ACAN,ACTL10,ADAM29,ADARB1,ADH1C,AKR1B10,AKR7A3,ANKRD18A,ANTXR1,AQP4,ARMC12,ARRDC5,ATP4B,AZGP1,B3GNT3,BATF3,BPIFB1,C11orf96,C15orf48,C1orf116,C1orf210,C2CD4A,C2CD4B,C6orf58,C9orf152,CAPN13,CAPN8,CAPN9,CATSPERD,CBLC,CBLIF,CCDC187,CCDC78,CCL8,CCND2,CD1A,CD200R1,CDKN1A,CEACAM3,CHIA,CHST9,CLDN9,CLEC5A,CMPK2,CNIH3,CNTD2,CPA2,CRYBG2,CTSE,CXCL17,CXCR1,CXCR2,CYP1A2,CYP2B7P,DENND5B,DLG2,DNAI2,DPYSL4,…	R-HSA-168249	Innate Immune System	2.75104e-05
DLBC	A4GNT,ACAN,ACTL10,ADAM29,ADARB1,ADH1C,AKR1B10,AKR7A3,ANKRD18A,ANTXR1,AQP4,ARMC12,ARRDC5,ATP4B,AZGP1,B3GNT3,BATF3,BPIFB1,C11orf96,C15orf48,C1orf116,C1orf210,C2CD4A,C2CD4B,C6orf58,C9orf152,CAPN13,CAPN8,CAPN9,CATSPERD,CBLC,CBLIF,CCDC187,CCDC78,CCL8,CCND2,CD1A,CD200R1,CDKN1A,CEACAM3,CHIA,CHST9,CLDN9,CLEC5A,CMPK2,CNIH3,CNTD2,CPA2,CRYBG2,CTSE,CXCL17,CXCR1,CXCR2,CYP1A2,CYP2B7P,DENND5B,DLG2,DNAI2,DPYSL4,…	R-HSA-5173105	O-linked glycosylation	5.5016e-05
DLBC	A4GNT,ACAN,ACTL10,ADAM29,ADARB1,ADH1C,AKR1B10,AKR7A3,ANKRD18A,ANTXR1,AQP4,ARMC12,ARRDC5,ATP4B,AZGP1,B3GNT3,BATF3,BPIFB1,C11orf96,C15orf48,C1orf116,C1orf210,C2CD4A,C2CD4B,C6orf58,C9orf152,CAPN13,CAPN8,CAPN9,CATSPERD,CBLC,CBLIF,CCDC187,CCDC78,CCL8,CCND2,CD1A,CD200R1,CDKN1A,CEACAM3,CHIA,CHST9,CLDN9,CLEC5A,CMPK2,CNIH3,CNTD2,CPA2,CRYBG2,CTSE,CXCL17,CXCR1,CXCR2,CYP1A2,CYP2B7P,DENND5B,DLG2,DNAI2,DPYSL4,…	R-HSA-5083636	Defective GALNT12 causes colorectal cancer 1 (CRCS1)	0.000381478
DLBC	A4GNT,ACAN,ACTL10,ADAM29,ADARB1,ADH1C,AKR1B10,AKR7A3,ANKRD18A,ANTXR1,AQP4,ARMC12,ARRDC5,ATP4B,AZGP1,B3GNT3,BATF3,BPIFB1,C11orf96,C15orf48,C1orf116,C1orf210,C2CD4A,C2CD4B,C6orf58,C9orf152,CAPN13,CAPN8,CAPN9,CATSPERD,CBLC,CBLIF,CCDC187,CCDC78,CCL8,CCND2,CD1A,CD200R1,CDKN1A,CEACAM3,CHIA,CHST9,CLDN9,CLEC5A,CMPK2,CNIH3,CNTD2,CPA2,CRYBG2,CTSE,CXCL17,CXCR1,CXCR2,CYP1A2,CYP2B7P,DENND5B,DLG2,DNAI2,DPYSL4,…	R-HSA-5083625	Defective GALNT3 causes familial hyperphosphatemic tumoral calcinosis (HFTC)	0.000381478
DLBC	A4GNT,ACAN,ACTL10,ADAM29,ADARB1,ADH1C,AKR1B10,AKR7A3,ANKRD18A,ANTXR1,AQP4,ARMC12,ARRDC5,ATP4B,AZGP1,B3GNT3,BATF3,BPIFB1,C11orf96,C15orf48,C1orf116,C1orf210,C2CD4A,C2CD4B,C6orf58,C9orf152,CAPN13,CAPN8,CAPN9,CATSPERD,CBLC,CBLIF,CCDC187,CCDC78,CCL8,CCND2,CD1A,CD200R1,CDKN1A,CEACAM3,CHIA,CHST9,CLDN9,CLEC5A,CMPK2,CNIH3,CNTD2,CPA2,CRYBG2,CTSE,CXCL17,CXCR1,CXCR2,CYP1A2,CYP2B7P,DENND5B,DLG2,DNAI2,DPYSL4,…	R-HSA-5083632	Defective C1GALT1C1 causes Tn polyagglutination syndrome (TNPS)	0.00047587
DLBC	A4GNT,ACAN,ACTL10,ADAM29,ADARB1,ADH1C,AKR1B10,AKR7A3,ANKRD18A,ANTXR1,AQP4,ARMC12,ARRDC5,ATP4B,AZGP1,B3GNT3,BATF3,BPIFB1,C11orf96,C15orf48,C1orf116,C1orf210,C2CD4A,C2CD4B,C6orf58,C9orf152,CAPN13,CAPN8,CAPN9,CATSPERD,CBLC,CBLIF,CCDC187,CCDC78,CCL8,CCND2,CD1A,CD200R1,CDKN1A,CEACAM3,CHIA,CHST9,CLDN9,CLEC5A,CMPK2,CNIH3,CNTD2,CPA2,CRYBG2,CTSE,CXCL17,CXCR1,CXCR2,CYP1A2,CYP2B7P,DENND5B,DLG2,DNAI2,DPYSL4,…	R-HSA-597592	Post-translational protein modification	0.000521744
DLBC	A4GNT,ACAN,ACTL10,ADAM29,ADARB1,ADH1C,AKR1B10,AKR7A3,ANKRD18A,ANTXR1,AQP4,ARMC12,ARRDC5,ATP4B,AZGP1,B3GNT3,BATF3,BPIFB1,C11orf96,C15orf48,C1orf116,C1orf210,C2CD4A,C2CD4B,C6orf58,C9orf152,CAPN13,CAPN8,CAPN9,CATSPERD,CBLC,CBLIF,CCDC187,CCDC78,CCL8,CCND2,CD1A,CD200R1,CDKN1A,CEACAM3,CHIA,CHST9,CLDN9,CLEC5A,CMPK2,CNIH3,CNTD2,CPA2,CRYBG2,CTSE,CXCL17,CXCR1,CXCR2,CYP1A2,CYP2B7P,DENND5B,DLG2,DNAI2,DPYSL4,…	R-HSA-1474228	Degradation of the extracellular matrix	0.00119862
DLBC	A4GNT,ACAN,ACTL10,ADAM29,ADARB1,ADH1C,AKR1B10,AKR7A3,ANKRD18A,ANTXR1,AQP4,ARMC12,ARRDC5,ATP4B,AZGP1,B3GNT3,BATF3,BPIFB1,C11orf96,C15orf48,C1orf116,C1orf210,C2CD4A,C2CD4B,C6orf58,C9orf152,CAPN13,CAPN8,CAPN9,CATSPERD,CBLC,CBLIF,CCDC187,CCDC78,CCL8,CCND2,CD1A,CD200R1,CDKN1A,CEACAM3,CHIA,CHST9,CLDN9,CLEC5A,CMPK2,CNIH3,CNTD2,CPA2,CRYBG2,CTSE,CXCL17,CXCR1,CXCR2,CYP1A2,CYP2B7P,DENND5B,DLG2,DNAI2,DPYSL4,…	R-HSA-977068	Termination of O-glycan biosynthesis	0.00145041
DLBC	A4GNT,ACAN,ACTL10,ADAM29,ADARB1,ADH1C,AKR1B10,AKR7A3,ANKRD18A,ANTXR1,AQP4,ARMC12,ARRDC5,ATP4B,AZGP1,B3GNT3,BATF3,BPIFB1,C11orf96,C15orf48,C1orf116,C1orf210,C2CD4A,C2CD4B,C6orf58,C9orf152,CAPN13,CAPN8,CAPN9,CATSPERD,CBLC,CBLIF,CCDC187,CCDC78,CCL8,CCND2,CD1A,CD200R1,CDKN1A,CEACAM3,CHIA,CHST9,CLDN9,CLEC5A,CMPK2,CNIH3,CNTD2,CPA2,CRYBG2,CTSE,CXCL17,CXCR1,CXCR2,CYP1A2,CYP2B7P,DENND5B,DLG2,DNAI2,DPYSL4,…	R-HSA-372790	Signaling by GPCR	0.00223373
DLBC	A4GNT,ACAN,ACTL10,ADAM29,ADARB1,ADH1C,AKR1B10,AKR7A3,ANKRD18A,ANTXR1,AQP4,ARMC12,ARRDC5,ATP4B,AZGP1,B3GNT3,BATF3,BPIFB1,C11orf96,C15orf48,C1orf116,C1orf210,C2CD4A,C2CD4B,C6orf58,C9orf152,CAPN13,CAPN8,CAPN9,CATSPERD,CBLC,CBLIF,CCDC187,CCDC78,CCL8,CCND2,CD1A,CD200R1,CDKN1A,CEACAM3,CHIA,CHST9,CLDN9,CLEC5A,CMPK2,CNIH3,CNTD2,CPA2,CRYBG2,CTSE,CXCL17,CXCR1,CXCR2,CYP1A2,CYP2B7P,DENND5B,DLG2,DNAI2,DPYSL4,…	R-HSA-112316	Neuronal System	0.00261866
DLBC	A4GNT,ACAN,ACTL10,ADAM29,ADARB1,ADH1C,AKR1B10,AKR7A3,ANKRD18A,ANTXR1,AQP4,ARMC12,ARRDC5,ATP4B,AZGP1,B3GNT3,BATF3,BPIFB1,C11orf96,C15orf48,C1orf116,C1orf210,C2CD4A,C2CD4B,C6orf58,C9orf152,CAPN13,CAPN8,CAPN9,CATSPERD,CBLC,CBLIF,CCDC187,CCDC78,CCL8,CCND2,CD1A,CD200R1,CDKN1A,CEACAM3,CHIA,CHST9,CLDN9,CLEC5A,CMPK2,CNIH3,CNTD2,CPA2,CRYBG2,CTSE,CXCL17,CXCR1,CXCR2,CYP1A2,CYP2B7P,DENND5B,DLG2,DNAI2,DPYSL4,…	R-HSA-5621480	Dectin-2 family	0.00263704
DLBC	A4GNT,ACAN,ACTL10,ADAM29,ADARB1,ADH1C,AKR1B10,AKR7A3,ANKRD18A,ANTXR1,AQP4,ARMC12,ARRDC5,ATP4B,AZGP1,B3GNT3,BATF3,BPIFB1,C11orf96,C15orf48,C1orf116,C1orf210,C2CD4A,C2CD4B,C6orf58,C9orf152,CAPN13,CAPN8,CAPN9,CATSPERD,CBLC,CBLIF,CCDC187,CCDC78,CCL8,CCND2,CD1A,CD200R1,CDKN1A,CEACAM3,CHIA,CHST9,CLDN9,CLEC5A,CMPK2,CNIH3,CNTD2,CPA2,CRYBG2,CTSE,CXCL17,CXCR1,CXCR2,CYP1A2,CYP2B7P,DENND5B,DLG2,DNAI2,DPYSL4,…	R-HSA-1280215	Cytokine Signaling in Immune system	0.00682321
DLBC	A4GNT,ACAN,ACTL10,ADAM29,ADARB1,ADH1C,AKR1B10,AKR7A3,ANKRD18A,ANTXR1,AQP4,ARMC12,ARRDC5,ATP4B,AZGP1,B3GNT3,BATF3,BPIFB1,C11orf96,C15orf48,C1orf116,C1orf210,C2CD4A,C2CD4B,C6orf58,C9orf152,CAPN13,CAPN8,CAPN9,CATSPERD,CBLC,CBLIF,CCDC187,CCDC78,CCL8,CCND2,CD1A,CD200R1,CDKN1A,CEACAM3,CHIA,CHST9,CLDN9,CLEC5A,CMPK2,CNIH3,CNTD2,CPA2,CRYBG2,CTSE,CXCL17,CXCR1,CXCR2,CYP1A2,CYP2B7P,DENND5B,DLG2,DNAI2,DPYSL4,…	R-HSA-418346	Platelet homeostasis	0.00808065
DLBC	A4GNT,ACAN,ACTL10,ADAM29,ADARB1,ADH1C,AKR1B10,AKR7A3,ANKRD18A,ANTXR1,AQP4,ARMC12,ARRDC5,ATP4B,AZGP1,B3GNT3,BATF3,BPIFB1,C11orf96,C15orf48,C1orf116,C1orf210,C2CD4A,C2CD4B,C6orf58,C9orf152,CAPN13,CAPN8,CAPN9,CATSPERD,CBLC,CBLIF,CCDC187,CCDC78,CCL8,CCND2,CD1A,CD200R1,CDKN1A,CEACAM3,CHIA,CHST9,CLDN9,CLEC5A,CMPK2,CNIH3,CNTD2,CPA2,CRYBG2,CTSE,CXCL17,CXCR1,CXCR2,CYP1A2,CYP2B7P,DENND5B,DLG2,DNAI2,DPYSL4,…	R-HSA-500792	GPCR ligand binding	0.0104055
DLBC	A4GNT,ACAN,ACTL10,ADAM29,ADARB1,ADH1C,AKR1B10,AKR7A3,ANKRD18A,ANTXR1,AQP4,ARMC12,ARRDC5,ATP4B,AZGP1,B3GNT3,BATF3,BPIFB1,C11orf96,C15orf48,C1orf116,C1orf210,C2CD4A,C2CD4B,C6orf58,C9orf152,CAPN13,CAPN8,CAPN9,CATSPERD,CBLC,CBLIF,CCDC187,CCDC78,CCL8,CCND2,CD1A,CD200R1,CDKN1A,CEACAM3,CHIA,CHST9,CLDN9,CLEC5A,CMPK2,CNIH3,CNTD2,CPA2,CRYBG2,CTSE,CXCL17,CXCR1,CXCR2,CYP1A2,CYP2B7P,DENND5B,DLG2,DNAI2,DPYSL4,…	R-HSA-425407	SLC-mediated transmembrane transport	0.011302
DLBC	A4GNT,ACAN,ACTL10,ADAM29,ADARB1,ADH1C,AKR1B10,AKR7A3,ANKRD18A,ANTXR1,AQP4,ARMC12,ARRDC5,ATP4B,AZGP1,B3GNT3,BATF3,BPIFB1,C11orf96,C15orf48,C1orf116,C1orf210,C2CD4A,C2CD4B,C6orf58,C9orf152,CAPN13,CAPN8,CAPN9,CATSPERD,CBLC,CBLIF,CCDC187,CCDC78,CCL8,CCND2,CD1A,CD200R1,CDKN1A,CEACAM3,CHIA,CHST9,CLDN9,CLEC5A,CMPK2,CNIH3,CNTD2,CPA2,CRYBG2,CTSE,CXCL17,CXCR1,CXCR2,CYP1A2,CYP2B7P,DENND5B,DLG2,DNAI2,DPYSL4,…	R-HSA-163125	Post-translational modification: synthesis of GPI-anchored proteins	0.0118272
DLBC	A4GNT,ACAN,ACTL10,ADAM29,ADARB1,ADH1C,AKR1B10,AKR7A3,ANKRD18A,ANTXR1,AQP4,ARMC12,ARRDC5,ATP4B,AZGP1,B3GNT3,BATF3,BPIFB1,C11orf96,C15orf48,C1orf116,C1orf210,C2CD4A,C2CD4B,C6orf58,C9orf152,CAPN13,CAPN8,CAPN9,CATSPERD,CBLC,CBLIF,CCDC187,CCDC78,CCL8,CCND2,CD1A,CD200R1,CDKN1A,CEACAM3,CHIA,CHST9,CLDN9,CLEC5A,CMPK2,CNIH3,CNTD2,CPA2,CRYBG2,CTSE,CXCL17,CXCR1,CXCR2,CYP1A2,CYP2B7P,DENND5B,DLG2,DNAI2,DPYSL4,…	R-HSA-418457	cGMP effects	0.0215314
DLBC	A4GNT,ACAN,ACTL10,ADAM29,ADARB1,ADH1C,AKR1B10,AKR7A3,ANKRD18A,ANTXR1,AQP4,ARMC12,ARRDC5,ATP4B,AZGP1,B3GNT3,BATF3,BPIFB1,C11orf96,C15orf48,C1orf116,C1orf210,C2CD4A,C2CD4B,C6orf58,C9orf152,CAPN13,CAPN8,CAPN9,CATSPERD,CBLC,CBLIF,CCDC187,CCDC78,CCL8,CCND2,CD1A,CD200R1,CDKN1A,CEACAM3,CHIA,CHST9,CLDN9,CLEC5A,CMPK2,CNIH3,CNTD2,CPA2,CRYBG2,CTSE,CXCL17,CXCR1,CXCR2,CYP1A2,CYP2B7P,DENND5B,DLG2,DNAI2,DPYSL4,…	R-HSA-1643685	Disease	0.0266533
DLBC	A4GNT,ACAN,ACTL10,ADAM29,ADARB1,ADH1C,AKR1B10,AKR7A3,ANKRD18A,ANTXR1,AQP4,ARMC12,ARRDC5,ATP4B,AZGP1,B3GNT3,BATF3,BPIFB1,C11orf96,C15orf48,C1orf116,C1orf210,C2CD4A,C2CD4B,C6orf58,C9orf152,CAPN13,CAPN8,CAPN9,CATSPERD,CBLC,CBLIF,CCDC187,CCDC78,CCL8,CCND2,CD1A,CD200R1,CDKN1A,CEACAM3,CHIA,CHST9,CLDN9,CLEC5A,CMPK2,CNIH3,CNTD2,CPA2,CRYBG2,CTSE,CXCL17,CXCR1,CXCR2,CYP1A2,CYP2B7P,DENND5B,DLG2,DNAI2,DPYSL4,…	R-HSA-418594	G alpha (i) signalling events	0.0290852
DLBC	A4GNT,ACAN,ACTL10,ADAM29,ADARB1,ADH1C,AKR1B10,AKR7A3,ANKRD18A,ANTXR1,AQP4,ARMC12,ARRDC5,ATP4B,AZGP1,B3GNT3,BATF3,BPIFB1,C11orf96,C15orf48,C1orf116,C1orf210,C2CD4A,C2CD4B,C6orf58,C9orf152,CAPN13,CAPN8,CAPN9,CATSPERD,CBLC,CBLIF,CCDC187,CCDC78,CCL8,CCND2,CD1A,CD200R1,CDKN1A,CEACAM3,CHIA,CHST9,CLDN9,CLEC5A,CMPK2,CNIH3,CNTD2,CPA2,CRYBG2,CTSE,CXCL17,CXCR1,CXCR2,CYP1A2,CYP2B7P,DENND5B,DLG2,DNAI2,DPYSL4,…	R-HSA-1474244	Extracellular matrix organization	0.0328835
DLBC	A4GNT,ACAN,ACTL10,ADAM29,ADARB1,ADH1C,AKR1B10,AKR7A3,ANKRD18A,ANTXR1,AQP4,ARMC12,ARRDC5,ATP4B,AZGP1,B3GNT3,BATF3,BPIFB1,C11orf96,C15orf48,C1orf116,C1orf210,C2CD4A,C2CD4B,C6orf58,C9orf152,CAPN13,CAPN8,CAPN9,CATSPERD,CBLC,CBLIF,CCDC187,CCDC78,CCL8,CCND2,CD1A,CD200R1,CDKN1A,CEACAM3,CHIA,CHST9,CLDN9,CLEC5A,CMPK2,CNIH3,CNTD2,CPA2,CRYBG2,CTSE,CXCL17,CXCR1,CXCR2,CYP1A2,CYP2B7P,DENND5B,DLG2,DNAI2,DPYSL4,…	R-HSA-109582	Hemostasis	0.0350747
ESCA	AADACL3,ABCC12,ABCC6P1,ABI1P1,ACP7,ACSM2A,ADAM2,ADAM23,ADAM30,ADAM5,ADAM7,ADAMTS19,ADAMTS7P3,ADAMTS9-AS2,ADCY2,ADCYAP1R1,ADGRG6,AKR1C7P,ALDH3A1,AMZ2P2,ANGPTL7,ANKRD26P3,ANKRD30BL,ANO1,AOX2P,APOBEC1,APOF,APOH,AQP4-AS1,AQP5,AQP6,ARHGAP36,ARSE,ATOH8,ATP1A2,B3GNT2P1,BAALC-AS2,BHLHA15,BICD1P1,BIRC8,BNIP3P37,BRD7P1,BRINP3,BVES-AS1,C10orf53,C11orf16,C17orf64,C1orf185,C1QTNF7,C2orf88,C3orf86,C4BPA,C5orf5…	R-HSA-1266738	Developmental Biology	1.03031e-09
ESCA	AADACL3,ABCC12,ABCC6P1,ABI1P1,ACP7,ACSM2A,ADAM2,ADAM23,ADAM30,ADAM5,ADAM7,ADAMTS19,ADAMTS7P3,ADAMTS9-AS2,ADCY2,ADCYAP1R1,ADGRG6,AKR1C7P,ALDH3A1,AMZ2P2,ANGPTL7,ANKRD26P3,ANKRD30BL,ANO1,AOX2P,APOBEC1,APOF,APOH,AQP4-AS1,AQP5,AQP6,ARHGAP36,ARSE,ATOH8,ATP1A2,B3GNT2P1,BAALC-AS2,BHLHA15,BICD1P1,BIRC8,BNIP3P37,BRD7P1,BRINP3,BVES-AS1,C10orf53,C11orf16,C17orf64,C1orf185,C1QTNF7,C2orf88,C3orf86,C4BPA,C5orf5…	R-HSA-6809371	Formation of the cornified envelope	2.28082e-07
ESCA	AADACL3,ABCC12,ABCC6P1,ABI1P1,ACP7,ACSM2A,ADAM2,ADAM23,ADAM30,ADAM5,ADAM7,ADAMTS19,ADAMTS7P3,ADAMTS9-AS2,ADCY2,ADCYAP1R1,ADGRG6,AKR1C7P,ALDH3A1,AMZ2P2,ANGPTL7,ANKRD26P3,ANKRD30BL,ANO1,AOX2P,APOBEC1,APOF,APOH,AQP4-AS1,AQP5,AQP6,ARHGAP36,ARSE,ATOH8,ATP1A2,B3GNT2P1,BAALC-AS2,BHLHA15,BICD1P1,BIRC8,BNIP3P37,BRD7P1,BRINP3,BVES-AS1,C10orf53,C11orf16,C17orf64,C1orf185,C1QTNF7,C2orf88,C3orf86,C4BPA,C5orf5…	R-HSA-202733	Cell surface interactions at the vascular wall	3.3453e-06
ESCA	AADACL3,ABCC12,ABCC6P1,ABI1P1,ACP7,ACSM2A,ADAM2,ADAM23,ADAM30,ADAM5,ADAM7,ADAMTS19,ADAMTS7P3,ADAMTS9-AS2,ADCY2,ADCYAP1R1,ADGRG6,AKR1C7P,ALDH3A1,AMZ2P2,ANGPTL7,ANKRD26P3,ANKRD30BL,ANO1,AOX2P,APOBEC1,APOF,APOH,AQP4-AS1,AQP5,AQP6,ARHGAP36,ARSE,ATOH8,ATP1A2,B3GNT2P1,BAALC-AS2,BHLHA15,BICD1P1,BIRC8,BNIP3P37,BRD7P1,BRINP3,BVES-AS1,C10orf53,C11orf16,C17orf64,C1orf185,C1QTNF7,C2orf88,C3orf86,C4BPA,C5orf5…	R-HSA-397014	Muscle contraction	1.09548e-05
ESCA	AADACL3,ABCC12,ABCC6P1,ABI1P1,ACP7,ACSM2A,ADAM2,ADAM23,ADAM30,ADAM5,ADAM7,ADAMTS19,ADAMTS7P3,ADAMTS9-AS2,ADCY2,ADCYAP1R1,ADGRG6,AKR1C7P,ALDH3A1,AMZ2P2,ANGPTL7,ANKRD26P3,ANKRD30BL,ANO1,AOX2P,APOBEC1,APOF,APOH,AQP4-AS1,AQP5,AQP6,ARHGAP36,ARSE,ATOH8,ATP1A2,B3GNT2P1,BAALC-AS2,BHLHA15,BICD1P1,BIRC8,BNIP3P37,BRD7P1,BRINP3,BVES-AS1,C10orf53,C11orf16,C17orf64,C1orf185,C1QTNF7,C2orf88,C3orf86,C4BPA,C5orf5…	R-HSA-168256	Immune System	2.0476e-05
ESCA	AADACL3,ABCC12,ABCC6P1,ABI1P1,ACP7,ACSM2A,ADAM2,ADAM23,ADAM30,ADAM5,ADAM7,ADAMTS19,ADAMTS7P3,ADAMTS9-AS2,ADCY2,ADCYAP1R1,ADGRG6,AKR1C7P,ALDH3A1,AMZ2P2,ANGPTL7,ANKRD26P3,ANKRD30BL,ANO1,AOX2P,APOBEC1,APOF,APOH,AQP4-AS1,AQP5,AQP6,ARHGAP36,ARSE,ATOH8,ATP1A2,B3GNT2P1,BAALC-AS2,BHLHA15,BICD1P1,BIRC8,BNIP3P37,BRD7P1,BRINP3,BVES-AS1,C10orf53,C11orf16,C17orf64,C1orf185,C1QTNF7,C2orf88,C3orf86,C4BPA,C5orf5…	R-HSA-6805567	Keratinization	2.08067e-05
ESCA	AADACL3,ABCC12,ABCC6P1,ABI1P1,ACP7,ACSM2A,ADAM2,ADAM23,ADAM30,ADAM5,ADAM7,ADAMTS19,ADAMTS7P3,ADAMTS9-AS2,ADCY2,ADCYAP1R1,ADGRG6,AKR1C7P,ALDH3A1,AMZ2P2,ANGPTL7,ANKRD26P3,ANKRD30BL,ANO1,AOX2P,APOBEC1,APOF,APOH,AQP4-AS1,AQP5,AQP6,ARHGAP36,ARSE,ATOH8,ATP1A2,B3GNT2P1,BAALC-AS2,BHLHA15,BICD1P1,BIRC8,BNIP3P37,BRD7P1,BRINP3,BVES-AS1,C10orf53,C11orf16,C17orf64,C1orf185,C1QTNF7,C2orf88,C3orf86,C4BPA,C5orf5…	R-HSA-109582	Hemostasis	0.000101379
ESCA	AADACL3,ABCC12,ABCC6P1,ABI1P1,ACP7,ACSM2A,ADAM2,ADAM23,ADAM30,ADAM5,ADAM7,ADAMTS19,ADAMTS7P3,ADAMTS9-AS2,ADCY2,ADCYAP1R1,ADGRG6,AKR1C7P,ALDH3A1,AMZ2P2,ANGPTL7,ANKRD26P3,ANKRD30BL,ANO1,AOX2P,APOBEC1,APOF,APOH,AQP4-AS1,AQP5,AQP6,ARHGAP36,ARSE,ATOH8,ATP1A2,B3GNT2P1,BAALC-AS2,BHLHA15,BICD1P1,BIRC8,BNIP3P37,BRD7P1,BRINP3,BVES-AS1,C10orf53,C11orf16,C17orf64,C1orf185,C1QTNF7,C2orf88,C3orf86,C4BPA,C5orf5…	R-HSA-112316	Neuronal System	0.000154754
ESCA	AADACL3,ABCC12,ABCC6P1,ABI1P1,ACP7,ACSM2A,ADAM2,ADAM23,ADAM30,ADAM5,ADAM7,ADAMTS19,ADAMTS7P3,ADAMTS9-AS2,ADCY2,ADCYAP1R1,ADGRG6,AKR1C7P,ALDH3A1,AMZ2P2,ANGPTL7,ANKRD26P3,ANKRD30BL,ANO1,AOX2P,APOBEC1,APOF,APOH,AQP4-AS1,AQP5,AQP6,ARHGAP36,ARSE,ATOH8,ATP1A2,B3GNT2P1,BAALC-AS2,BHLHA15,BICD1P1,BIRC8,BNIP3P37,BRD7P1,BRINP3,BVES-AS1,C10orf53,C11orf16,C17orf64,C1orf185,C1QTNF7,C2orf88,C3orf86,C4BPA,C5orf5…	R-HSA-162582	Signal Transduction	0.000171055
ESCA	AADACL3,ABCC12,ABCC6P1,ABI1P1,ACP7,ACSM2A,ADAM2,ADAM23,ADAM30,ADAM5,ADAM7,ADAMTS19,ADAMTS7P3,ADAMTS9-AS2,ADCY2,ADCYAP1R1,ADGRG6,AKR1C7P,ALDH3A1,AMZ2P2,ANGPTL7,ANKRD26P3,ANKRD30BL,ANO1,AOX2P,APOBEC1,APOF,APOH,AQP4-AS1,AQP5,AQP6,ARHGAP36,ARSE,ATOH8,ATP1A2,B3GNT2P1,BAALC-AS2,BHLHA15,BICD1P1,BIRC8,BNIP3P37,BRD7P1,BRINP3,BVES-AS1,C10orf53,C11orf16,C17orf64,C1orf185,C1QTNF7,C2orf88,C3orf86,C4BPA,C5orf5…	R-HSA-382551	Transport of small molecules	0.00021348
ESCA	AADACL3,ABCC12,ABCC6P1,ABI1P1,ACP7,ACSM2A,ADAM2,ADAM23,ADAM30,ADAM5,ADAM7,ADAMTS19,ADAMTS7P3,ADAMTS9-AS2,ADCY2,ADCYAP1R1,ADGRG6,AKR1C7P,ALDH3A1,AMZ2P2,ANGPTL7,ANKRD26P3,ANKRD30BL,ANO1,AOX2P,APOBEC1,APOF,APOH,AQP4-AS1,AQP5,AQP6,ARHGAP36,ARSE,ATOH8,ATP1A2,B3GNT2P1,BAALC-AS2,BHLHA15,BICD1P1,BIRC8,BNIP3P37,BRD7P1,BRINP3,BVES-AS1,C10orf53,C11orf16,C17orf64,C1orf185,C1QTNF7,C2orf88,C3orf86,C4BPA,C5orf5…	R-HSA-977606	Regulation of Complement cascade	0.000423682
ESCA	AADACL3,ABCC12,ABCC6P1,ABI1P1,ACP7,ACSM2A,ADAM2,ADAM23,ADAM30,ADAM5,ADAM7,ADAMTS19,ADAMTS7P3,ADAMTS9-AS2,ADCY2,ADCYAP1R1,ADGRG6,AKR1C7P,ALDH3A1,AMZ2P2,ANGPTL7,ANKRD26P3,ANKRD30BL,ANO1,AOX2P,APOBEC1,APOF,APOH,AQP4-AS1,AQP5,AQP6,ARHGAP36,ARSE,ATOH8,ATP1A2,B3GNT2P1,BAALC-AS2,BHLHA15,BICD1P1,BIRC8,BNIP3P37,BRD7P1,BRINP3,BVES-AS1,C10orf53,C11orf16,C17orf64,C1orf185,C1QTNF7,C2orf88,C3orf86,C4BPA,C5orf5…	R-HSA-5576891	Cardiac conduction	0.000758257
ESCA	AADACL3,ABCC12,ABCC6P1,ABI1P1,ACP7,ACSM2A,ADAM2,ADAM23,ADAM30,ADAM5,ADAM7,ADAMTS19,ADAMTS7P3,ADAMTS9-AS2,ADCY2,ADCYAP1R1,ADGRG6,AKR1C7P,ALDH3A1,AMZ2P2,ANGPTL7,ANKRD26P3,ANKRD30BL,ANO1,AOX2P,APOBEC1,APOF,APOH,AQP4-AS1,AQP5,AQP6,ARHGAP36,ARSE,ATOH8,ATP1A2,B3GNT2P1,BAALC-AS2,BHLHA15,BICD1P1,BIRC8,BNIP3P37,BRD7P1,BRINP3,BVES-AS1,C10orf53,C11orf16,C17orf64,C1orf185,C1QTNF7,C2orf88,C3orf86,C4BPA,C5orf5…	R-HSA-166658	Complement cascade	0.000801623
ESCA	AADACL3,ABCC12,ABCC6P1,ABI1P1,ACP7,ACSM2A,ADAM2,ADAM23,ADAM30,ADAM5,ADAM7,ADAMTS19,ADAMTS7P3,ADAMTS9-AS2,ADCY2,ADCYAP1R1,ADGRG6,AKR1C7P,ALDH3A1,AMZ2P2,ANGPTL7,ANKRD26P3,ANKRD30BL,ANO1,AOX2P,APOBEC1,APOF,APOH,AQP4-AS1,AQP5,AQP6,ARHGAP36,ARSE,ATOH8,ATP1A2,B3GNT2P1,BAALC-AS2,BHLHA15,BICD1P1,BIRC8,BNIP3P37,BRD7P1,BRINP3,BVES-AS1,C10orf53,C11orf16,C17orf64,C1orf185,C1QTNF7,C2orf88,C3orf86,C4BPA,C5orf5…	R-HSA-2173782	Binding and Uptake of Ligands by Scavenger Receptors	0.00466767
ESCA	AADACL3,ABCC12,ABCC6P1,ABI1P1,ACP7,ACSM2A,ADAM2,ADAM23,ADAM30,ADAM5,ADAM7,ADAMTS19,ADAMTS7P3,ADAMTS9-AS2,ADCY2,ADCYAP1R1,ADGRG6,AKR1C7P,ALDH3A1,AMZ2P2,ANGPTL7,ANKRD26P3,ANKRD30BL,ANO1,AOX2P,APOBEC1,APOF,APOH,AQP4-AS1,AQP5,AQP6,ARHGAP36,ARSE,ATOH8,ATP1A2,B3GNT2P1,BAALC-AS2,BHLHA15,BICD1P1,BIRC8,BNIP3P37,BRD7P1,BRINP3,BVES-AS1,C10orf53,C11orf16,C17orf64,C1orf185,C1QTNF7,C2orf88,C3orf86,C4BPA,C5orf5…	R-HSA-112314	Neurotransmitter receptors and postsynaptic signal transmission	0.00756995
ESCA	AADACL3,ABCC12,ABCC6P1,ABI1P1,ACP7,ACSM2A,ADAM2,ADAM23,ADAM30,ADAM5,ADAM7,ADAMTS19,ADAMTS7P3,ADAMTS9-AS2,ADCY2,ADCYAP1R1,ADGRG6,AKR1C7P,ALDH3A1,AMZ2P2,ANGPTL7,ANKRD26P3,ANKRD30BL,ANO1,AOX2P,APOBEC1,APOF,APOH,AQP4-AS1,AQP5,AQP6,ARHGAP36,ARSE,ATOH8,ATP1A2,B3GNT2P1,BAALC-AS2,BHLHA15,BICD1P1,BIRC8,BNIP3P37,BRD7P1,BRINP3,BVES-AS1,C10orf53,C11orf16,C17orf64,C1orf185,C1QTNF7,C2orf88,C3orf86,C4BPA,C5orf5…	R-HSA-112315	Transmission across Chemical Synapses	0.00851855
ESCA	AADACL3,ABCC12,ABCC6P1,ABI1P1,ACP7,ACSM2A,ADAM2,ADAM23,ADAM30,ADAM5,ADAM7,ADAMTS19,ADAMTS7P3,ADAMTS9-AS2,ADCY2,ADCYAP1R1,ADGRG6,AKR1C7P,ALDH3A1,AMZ2P2,ANGPTL7,ANKRD26P3,ANKRD30BL,ANO1,AOX2P,APOBEC1,APOF,APOH,AQP4-AS1,AQP5,AQP6,ARHGAP36,ARSE,ATOH8,ATP1A2,B3GNT2P1,BAALC-AS2,BHLHA15,BICD1P1,BIRC8,BNIP3P37,BRD7P1,BRINP3,BVES-AS1,C10orf53,C11orf16,C17orf64,C1orf185,C1QTNF7,C2orf88,C3orf86,C4BPA,C5orf5…	R-HSA-2168880	Scavenging of heme from plasma	0.0120926
ESCA	AADACL3,ABCC12,ABCC6P1,ABI1P1,ACP7,ACSM2A,ADAM2,ADAM23,ADAM30,ADAM5,ADAM7,ADAMTS19,ADAMTS7P3,ADAMTS9-AS2,ADCY2,ADCYAP1R1,ADGRG6,AKR1C7P,ALDH3A1,AMZ2P2,ANGPTL7,ANKRD26P3,ANKRD30BL,ANO1,AOX2P,APOBEC1,APOF,APOH,AQP4-AS1,AQP5,AQP6,ARHGAP36,ARSE,ATOH8,ATP1A2,B3GNT2P1,BAALC-AS2,BHLHA15,BICD1P1,BIRC8,BNIP3P37,BRD7P1,BRINP3,BVES-AS1,C10orf53,C11orf16,C17orf64,C1orf185,C1QTNF7,C2orf88,C3orf86,C4BPA,C5orf5…	R-HSA-5576890	Phase 3 - rapid repolarisation	0.0129037
ESCA	AADACL3,ABCC12,ABCC6P1,ABI1P1,ACP7,ACSM2A,ADAM2,ADAM23,ADAM30,ADAM5,ADAM7,ADAMTS19,ADAMTS7P3,ADAMTS9-AS2,ADCY2,ADCYAP1R1,ADGRG6,AKR1C7P,ALDH3A1,AMZ2P2,ANGPTL7,ANKRD26P3,ANKRD30BL,ANO1,AOX2P,APOBEC1,APOF,APOH,AQP4-AS1,AQP5,AQP6,ARHGAP36,ARSE,ATOH8,ATP1A2,B3GNT2P1,BAALC-AS2,BHLHA15,BICD1P1,BIRC8,BNIP3P37,BRD7P1,BRINP3,BVES-AS1,C10orf53,C11orf16,C17orf64,C1orf185,C1QTNF7,C2orf88,C3orf86,C4BPA,C5orf5…	R-HSA-5683057	MAPK family signaling cascades	0.0300801
ESCA	AADACL3,ABCC12,ABCC6P1,ABI1P1,ACP7,ACSM2A,ADAM2,ADAM23,ADAM30,ADAM5,ADAM7,ADAMTS19,ADAMTS7P3,ADAMTS9-AS2,ADCY2,ADCYAP1R1,ADGRG6,AKR1C7P,ALDH3A1,AMZ2P2,ANGPTL7,ANKRD26P3,ANKRD30BL,ANO1,AOX2P,APOBEC1,APOF,APOH,AQP4-AS1,AQP5,AQP6,ARHGAP36,ARSE,ATOH8,ATP1A2,B3GNT2P1,BAALC-AS2,BHLHA15,BICD1P1,BIRC8,BNIP3P37,BRD7P1,BRINP3,BVES-AS1,C10orf53,C11orf16,C17orf64,C1orf185,C1QTNF7,C2orf88,C3orf86,C4BPA,C5orf5…	R-HSA-1839122	Signaling by activated point mutants of FGFR1	0.0376215
ESCA	AADACL3,ABCC12,ABCC6P1,ABI1P1,ACP7,ACSM2A,ADAM2,ADAM23,ADAM30,ADAM5,ADAM7,ADAMTS19,ADAMTS7P3,ADAMTS9-AS2,ADCY2,ADCYAP1R1,ADGRG6,AKR1C7P,ALDH3A1,AMZ2P2,ANGPTL7,ANKRD26P3,ANKRD30BL,ANO1,AOX2P,APOBEC1,APOF,APOH,AQP4-AS1,AQP5,AQP6,ARHGAP36,ARSE,ATOH8,ATP1A2,B3GNT2P1,BAALC-AS2,BHLHA15,BICD1P1,BIRC8,BNIP3P37,BRD7P1,BRINP3,BVES-AS1,C10orf53,C11orf16,C17orf64,C1orf185,C1QTNF7,C2orf88,C3orf86,C4BPA,C5orf5…	R-HSA-500792	GPCR ligand binding	0.0383918
ESCA	AADACL3,ABCC12,ABCC6P1,ABI1P1,ACP7,ACSM2A,ADAM2,ADAM23,ADAM30,ADAM5,ADAM7,ADAMTS19,ADAMTS7P3,ADAMTS9-AS2,ADCY2,ADCYAP1R1,ADGRG6,AKR1C7P,ALDH3A1,AMZ2P2,ANGPTL7,ANKRD26P3,ANKRD30BL,ANO1,AOX2P,APOBEC1,APOF,APOH,AQP4-AS1,AQP5,AQP6,ARHGAP36,ARSE,ATOH8,ATP1A2,B3GNT2P1,BAALC-AS2,BHLHA15,BICD1P1,BIRC8,BNIP3P37,BRD7P1,BRINP3,BVES-AS1,C10orf53,C11orf16,C17orf64,C1orf185,C1QTNF7,C2orf88,C3orf86,C4BPA,C5orf5…	R-HSA-452723	Transcriptional regulation of pluripotent stem cells	0.0402909
ESCA	AADACL3,ABCC12,ABCC6P1,ABI1P1,ACP7,ACSM2A,ADAM2,ADAM23,ADAM30,ADAM5,ADAM7,ADAMTS19,ADAMTS7P3,ADAMTS9-AS2,ADCY2,ADCYAP1R1,ADGRG6,AKR1C7P,ALDH3A1,AMZ2P2,ANGPTL7,ANKRD26P3,ANKRD30BL,ANO1,AOX2P,APOBEC1,APOF,APOH,AQP4-AS1,AQP5,AQP6,ARHGAP36,ARSE,ATOH8,ATP1A2,B3GNT2P1,BAALC-AS2,BHLHA15,BICD1P1,BIRC8,BNIP3P37,BRD7P1,BRINP3,BVES-AS1,C10orf53,C11orf16,C17orf64,C1orf185,C1QTNF7,C2orf88,C3orf86,C4BPA,C5orf5…	R-HSA-1474165	Reproduction	0.041449
ESCA	AADACL3,ABCC12,ABCC6P1,ABI1P1,ACP7,ACSM2A,ADAM2,ADAM23,ADAM30,ADAM5,ADAM7,ADAMTS19,ADAMTS7P3,ADAMTS9-AS2,ADCY2,ADCYAP1R1,ADGRG6,AKR1C7P,ALDH3A1,AMZ2P2,ANGPTL7,ANKRD26P3,ANKRD30BL,ANO1,AOX2P,APOBEC1,APOF,APOH,AQP4-AS1,AQP5,AQP6,ARHGAP36,ARSE,ATOH8,ATP1A2,B3GNT2P1,BAALC-AS2,BHLHA15,BICD1P1,BIRC8,BNIP3P37,BRD7P1,BRINP3,BVES-AS1,C10orf53,C11orf16,C17orf64,C1orf185,C1QTNF7,C2orf88,C3orf86,C4BPA,C5orf5…	R-HSA-5690714	CD22 mediated BCR regulation	0.0481994
ESCA	AADACL3,ABCC12,ABCC6P1,ABI1P1,ACP7,ACSM2A,ADAM2,ADAM23,ADAM30,ADAM5,ADAM7,ADAMTS19,ADAMTS7P3,ADAMTS9-AS2,ADCY2,ADCYAP1R1,ADGRG6,AKR1C7P,ALDH3A1,AMZ2P2,ANGPTL7,ANKRD26P3,ANKRD30BL,ANO1,AOX2P,APOBEC1,APOF,APOH,AQP4-AS1,AQP5,AQP6,ARHGAP36,ARSE,ATOH8,ATP1A2,B3GNT2P1,BAALC-AS2,BHLHA15,BICD1P1,BIRC8,BNIP3P37,BRD7P1,BRINP3,BVES-AS1,C10orf53,C11orf16,C17orf64,C1orf185,C1QTNF7,C2orf88,C3orf86,C4BPA,C5orf5…	R-HSA-190373	FGFR1c ligand binding and activation	0.0499862
KIRC	ABAT,ABCB11,ACTL6B,ADAM5,ADAMTS16,ADGRF2,AGBL1-AS1,AGR2,AGXT,AIPL1,AK6P2,AKR1B1P6,ALG9-IT1,ALPG,AMBP,AMELX,AMZ2P2,ANKRD20A8P,ANKRD30B,ANXA8,APCDD1L,APOF,AQP6,ARHGAP26-IT1,ARLNC1,ASIC1,ASPDH,ASTN1,ATG9B,ATP2A1-AS1,ATP5PBP7,AURKB,AXDND1,B3GALNT2P1,BAALC-AS2,BASP1,BHMG1,BICD1P1,BIRC8,BNIP3P35,BOLL,BPIFB5P,BPIFC,BRIX1P1,BRWD1P1,C17orf99,C1orf158,C8orf34-AS1,CA1,CACYBPP1,CALCA,CAPN8,CATSPER4,CBLL2,CCD…	R-HSA-1640170	Cell Cycle	1.51381e-07
KIRC	ABAT,ABCB11,ACTL6B,ADAM5,ADAMTS16,ADGRF2,AGBL1-AS1,AGR2,AGXT,AIPL1,AK6P2,AKR1B1P6,ALG9-IT1,ALPG,AMBP,AMELX,AMZ2P2,ANKRD20A8P,ANKRD30B,ANXA8,APCDD1L,APOF,AQP6,ARHGAP26-IT1,ARLNC1,ASIC1,ASPDH,ASTN1,ATG9B,ATP2A1-AS1,ATP5PBP7,AURKB,AXDND1,B3GALNT2P1,BAALC-AS2,BASP1,BHMG1,BICD1P1,BIRC8,BNIP3P35,BOLL,BPIFB5P,BPIFC,BRIX1P1,BRWD1P1,C17orf99,C1orf158,C8orf34-AS1,CA1,CACYBPP1,CALCA,CAPN8,CATSPER4,CBLL2,CCD…	R-HSA-162582	Signal Transduction	1.88883e-06
KIRC	ABAT,ABCB11,ACTL6B,ADAM5,ADAMTS16,ADGRF2,AGBL1-AS1,AGR2,AGXT,AIPL1,AK6P2,AKR1B1P6,ALG9-IT1,ALPG,AMBP,AMELX,AMZ2P2,ANKRD20A8P,ANKRD30B,ANXA8,APCDD1L,APOF,AQP6,ARHGAP26-IT1,ARLNC1,ASIC1,ASPDH,ASTN1,ATG9B,ATP2A1-AS1,ATP5PBP7,AURKB,AXDND1,B3GALNT2P1,BAALC-AS2,BASP1,BHMG1,BICD1P1,BIRC8,BNIP3P35,BOLL,BPIFB5P,BPIFC,BRIX1P1,BRWD1P1,C17orf99,C1orf158,C8orf34-AS1,CA1,CACYBPP1,CALCA,CAPN8,CATSPER4,CBLL2,CCD…	R-HSA-69278	Cell Cycle, Mitotic	2.66935e-05
KIRC	ABAT,ABCB11,ACTL6B,ADAM5,ADAMTS16,ADGRF2,AGBL1-AS1,AGR2,AGXT,AIPL1,AK6P2,AKR1B1P6,ALG9-IT1,ALPG,AMBP,AMELX,AMZ2P2,ANKRD20A8P,ANKRD30B,ANXA8,APCDD1L,APOF,AQP6,ARHGAP26-IT1,ARLNC1,ASIC1,ASPDH,ASTN1,ATG9B,ATP2A1-AS1,ATP5PBP7,AURKB,AXDND1,B3GALNT2P1,BAALC-AS2,BASP1,BHMG1,BICD1P1,BIRC8,BNIP3P35,BOLL,BPIFB5P,BPIFC,BRIX1P1,BRWD1P1,C17orf99,C1orf158,C8orf34-AS1,CA1,CACYBPP1,CALCA,CAPN8,CATSPER4,CBLL2,CCD…	R-HSA-69618	Mitotic Spindle Checkpoint	0.00179591
KIRC	ABAT,ABCB11,ACTL6B,ADAM5,ADAMTS16,ADGRF2,AGBL1-AS1,AGR2,AGXT,AIPL1,AK6P2,AKR1B1P6,ALG9-IT1,ALPG,AMBP,AMELX,AMZ2P2,ANKRD20A8P,ANKRD30B,ANXA8,APCDD1L,APOF,AQP6,ARHGAP26-IT1,ARLNC1,ASIC1,ASPDH,ASTN1,ATG9B,ATP2A1-AS1,ATP5PBP7,AURKB,AXDND1,B3GALNT2P1,BAALC-AS2,BASP1,BHMG1,BICD1P1,BIRC8,BNIP3P35,BOLL,BPIFB5P,BPIFC,BRIX1P1,BRWD1P1,C17orf99,C1orf158,C8orf34-AS1,CA1,CACYBPP1,CALCA,CAPN8,CATSPER4,CBLL2,CCD…	R-HSA-500792	GPCR ligand binding	0.00447348
KIRC	ABAT,ABCB11,ACTL6B,ADAM5,ADAMTS16,ADGRF2,AGBL1-AS1,AGR2,AGXT,AIPL1,AK6P2,AKR1B1P6,ALG9-IT1,ALPG,AMBP,AMELX,AMZ2P2,ANKRD20A8P,ANKRD30B,ANXA8,APCDD1L,APOF,AQP6,ARHGAP26-IT1,ARLNC1,ASIC1,ASPDH,ASTN1,ATG9B,ATP2A1-AS1,ATP5PBP7,AURKB,AXDND1,B3GALNT2P1,BAALC-AS2,BASP1,BHMG1,BICD1P1,BIRC8,BNIP3P35,BOLL,BPIFB5P,BPIFC,BRIX1P1,BRWD1P1,C17orf99,C1orf158,C8orf34-AS1,CA1,CACYBPP1,CALCA,CAPN8,CATSPER4,CBLL2,CCD…	R-HSA-372790	Signaling by GPCR	0.00988414
KIRC	ABAT,ABCB11,ACTL6B,ADAM5,ADAMTS16,ADGRF2,AGBL1-AS1,AGR2,AGXT,AIPL1,AK6P2,AKR1B1P6,ALG9-IT1,ALPG,AMBP,AMELX,AMZ2P2,ANKRD20A8P,ANKRD30B,ANXA8,APCDD1L,APOF,AQP6,ARHGAP26-IT1,ARLNC1,ASIC1,ASPDH,ASTN1,ATG9B,ATP2A1-AS1,ATP5PBP7,AURKB,AXDND1,B3GALNT2P1,BAALC-AS2,BASP1,BHMG1,BICD1P1,BIRC8,BNIP3P35,BOLL,BPIFB5P,BPIFC,BRIX1P1,BRWD1P1,C17orf99,C1orf158,C8orf34-AS1,CA1,CACYBPP1,CALCA,CAPN8,CATSPER4,CBLL2,CCD…	R-HSA-141444	Amplification of signal from unattached kinetochores via a MAD2 inhibitory signal	0.0109667
KIRC	ABAT,ABCB11,ACTL6B,ADAM5,ADAMTS16,ADGRF2,AGBL1-AS1,AGR2,AGXT,AIPL1,AK6P2,AKR1B1P6,ALG9-IT1,ALPG,AMBP,AMELX,AMZ2P2,ANKRD20A8P,ANKRD30B,ANXA8,APCDD1L,APOF,AQP6,ARHGAP26-IT1,ARLNC1,ASIC1,ASPDH,ASTN1,ATG9B,ATP2A1-AS1,ATP5PBP7,AURKB,AXDND1,B3GALNT2P1,BAALC-AS2,BASP1,BHMG1,BICD1P1,BIRC8,BNIP3P35,BOLL,BPIFB5P,BPIFC,BRIX1P1,BRWD1P1,C17orf99,C1orf158,C8orf34-AS1,CA1,CACYBPP1,CALCA,CAPN8,CATSPER4,CBLL2,CCD…	R-HSA-141424	Amplification of signal from the kinetochores	0.0109667
KIRC	ABAT,ABCB11,ACTL6B,ADAM5,ADAMTS16,ADGRF2,AGBL1-AS1,AGR2,AGXT,AIPL1,AK6P2,AKR1B1P6,ALG9-IT1,ALPG,AMBP,AMELX,AMZ2P2,ANKRD20A8P,ANKRD30B,ANXA8,APCDD1L,APOF,AQP6,ARHGAP26-IT1,ARLNC1,ASIC1,ASPDH,ASTN1,ATG9B,ATP2A1-AS1,ATP5PBP7,AURKB,AXDND1,B3GALNT2P1,BAALC-AS2,BASP1,BHMG1,BICD1P1,BIRC8,BNIP3P35,BOLL,BPIFB5P,BPIFC,BRIX1P1,BRWD1P1,C17orf99,C1orf158,C8orf34-AS1,CA1,CACYBPP1,CALCA,CAPN8,CATSPER4,CBLL2,CCD…	R-HSA-195258	RHO GTPase Effectors	0.0122324
KIRC	ABAT,ABCB11,ACTL6B,ADAM5,ADAMTS16,ADGRF2,AGBL1-AS1,AGR2,AGXT,AIPL1,AK6P2,AKR1B1P6,ALG9-IT1,ALPG,AMBP,AMELX,AMZ2P2,ANKRD20A8P,ANKRD30B,ANXA8,APCDD1L,APOF,AQP6,ARHGAP26-IT1,ARLNC1,ASIC1,ASPDH,ASTN1,ATG9B,ATP2A1-AS1,ATP5PBP7,AURKB,AXDND1,B3GALNT2P1,BAALC-AS2,BASP1,BHMG1,BICD1P1,BIRC8,BNIP3P35,BOLL,BPIFB5P,BPIFC,BRIX1P1,BRWD1P1,C17orf99,C1orf158,C8orf34-AS1,CA1,CACYBPP1,CALCA,CAPN8,CATSPER4,CBLL2,CCD…	R-HSA-68886	M Phase	0.0123621
KIRC	ABAT,ABCB11,ACTL6B,ADAM5,ADAMTS16,ADGRF2,AGBL1-AS1,AGR2,AGXT,AIPL1,AK6P2,AKR1B1P6,ALG9-IT1,ALPG,AMBP,AMELX,AMZ2P2,ANKRD20A8P,ANKRD30B,ANXA8,APCDD1L,APOF,AQP6,ARHGAP26-IT1,ARLNC1,ASIC1,ASPDH,ASTN1,ATG9B,ATP2A1-AS1,ATP5PBP7,AURKB,AXDND1,B3GALNT2P1,BAALC-AS2,BASP1,BHMG1,BICD1P1,BIRC8,BNIP3P35,BOLL,BPIFB5P,BPIFC,BRIX1P1,BRWD1P1,C17orf99,C1orf158,C8orf34-AS1,CA1,CACYBPP1,CALCA,CAPN8,CATSPER4,CBLL2,CCD…	R-HSA-74160	Gene expression (Transcription)	0.0137309
KIRC	ABAT,ABCB11,ACTL6B,ADAM5,ADAMTS16,ADGRF2,AGBL1-AS1,AGR2,AGXT,AIPL1,AK6P2,AKR1B1P6,ALG9-IT1,ALPG,AMBP,AMELX,AMZ2P2,ANKRD20A8P,ANKRD30B,ANXA8,APCDD1L,APOF,AQP6,ARHGAP26-IT1,ARLNC1,ASIC1,ASPDH,ASTN1,ATG9B,ATP2A1-AS1,ATP5PBP7,AURKB,AXDND1,B3GALNT2P1,BAALC-AS2,BASP1,BHMG1,BICD1P1,BIRC8,BNIP3P35,BOLL,BPIFB5P,BPIFC,BRIX1P1,BRWD1P1,C17orf99,C1orf158,C8orf34-AS1,CA1,CACYBPP1,CALCA,CAPN8,CATSPER4,CBLL2,CCD…	R-HSA-388396	GPCR downstream signalling	0.0164164
KIRC	ABAT,ABCB11,ACTL6B,ADAM5,ADAMTS16,ADGRF2,AGBL1-AS1,AGR2,AGXT,AIPL1,AK6P2,AKR1B1P6,ALG9-IT1,ALPG,AMBP,AMELX,AMZ2P2,ANKRD20A8P,ANKRD30B,ANXA8,APCDD1L,APOF,AQP6,ARHGAP26-IT1,ARLNC1,ASIC1,ASPDH,ASTN1,ATG9B,ATP2A1-AS1,ATP5PBP7,AURKB,AXDND1,B3GALNT2P1,BAALC-AS2,BASP1,BHMG1,BICD1P1,BIRC8,BNIP3P35,BOLL,BPIFB5P,BPIFC,BRIX1P1,BRWD1P1,C17orf99,C1orf158,C8orf34-AS1,CA1,CACYBPP1,CALCA,CAPN8,CATSPER4,CBLL2,CCD…	R-HSA-1221632	Meiotic synapsis	0.0187288
KIRC	ABAT,ABCB11,ACTL6B,ADAM5,ADAMTS16,ADGRF2,AGBL1-AS1,AGR2,AGXT,AIPL1,AK6P2,AKR1B1P6,ALG9-IT1,ALPG,AMBP,AMELX,AMZ2P2,ANKRD20A8P,ANKRD30B,ANXA8,APCDD1L,APOF,AQP6,ARHGAP26-IT1,ARLNC1,ASIC1,ASPDH,ASTN1,ATG9B,ATP2A1-AS1,ATP5PBP7,AURKB,AXDND1,B3GALNT2P1,BAALC-AS2,BASP1,BHMG1,BICD1P1,BIRC8,BNIP3P35,BOLL,BPIFB5P,BPIFC,BRIX1P1,BRWD1P1,C17orf99,C1orf158,C8orf34-AS1,CA1,CACYBPP1,CALCA,CAPN8,CATSPER4,CBLL2,CCD…	R-HSA-2500257	Resolution of Sister Chromatid Cohesion	0.0231648
KIRC	ABAT,ABCB11,ACTL6B,ADAM5,ADAMTS16,ADGRF2,AGBL1-AS1,AGR2,AGXT,AIPL1,AK6P2,AKR1B1P6,ALG9-IT1,ALPG,AMBP,AMELX,AMZ2P2,ANKRD20A8P,ANKRD30B,ANXA8,APCDD1L,APOF,AQP6,ARHGAP26-IT1,ARLNC1,ASIC1,ASPDH,ASTN1,ATG9B,ATP2A1-AS1,ATP5PBP7,AURKB,AXDND1,B3GALNT2P1,BAALC-AS2,BASP1,BHMG1,BICD1P1,BIRC8,BNIP3P35,BOLL,BPIFB5P,BPIFC,BRIX1P1,BRWD1P1,C17orf99,C1orf158,C8orf34-AS1,CA1,CACYBPP1,CALCA,CAPN8,CATSPER4,CBLL2,CCD…	R-HSA-211897	Cytochrome P450 - arranged by substrate type	0.0278032
KIRC	ABAT,ABCB11,ACTL6B,ADAM5,ADAMTS16,ADGRF2,AGBL1-AS1,AGR2,AGXT,AIPL1,AK6P2,AKR1B1P6,ALG9-IT1,ALPG,AMBP,AMELX,AMZ2P2,ANKRD20A8P,ANKRD30B,ANXA8,APCDD1L,APOF,AQP6,ARHGAP26-IT1,ARLNC1,ASIC1,ASPDH,ASTN1,ATG9B,ATP2A1-AS1,ATP5PBP7,AURKB,AXDND1,B3GALNT2P1,BAALC-AS2,BASP1,BHMG1,BICD1P1,BIRC8,BNIP3P35,BOLL,BPIFB5P,BPIFC,BRIX1P1,BRWD1P1,C17orf99,C1orf158,C8orf34-AS1,CA1,CACYBPP1,CALCA,CAPN8,CATSPER4,CBLL2,CCD…	R-HSA-212436	Generic Transcription Pathway	0.0322812
KIRC	ABAT,ABCB11,ACTL6B,ADAM5,ADAMTS16,ADGRF2,AGBL1-AS1,AGR2,AGXT,AIPL1,AK6P2,AKR1B1P6,ALG9-IT1,ALPG,AMBP,AMELX,AMZ2P2,ANKRD20A8P,ANKRD30B,ANXA8,APCDD1L,APOF,AQP6,ARHGAP26-IT1,ARLNC1,ASIC1,ASPDH,ASTN1,ATG9B,ATP2A1-AS1,ATP5PBP7,AURKB,AXDND1,B3GALNT2P1,BAALC-AS2,BASP1,BHMG1,BICD1P1,BIRC8,BNIP3P35,BOLL,BPIFB5P,BPIFC,BRIX1P1,BRWD1P1,C17orf99,C1orf158,C8orf34-AS1,CA1,CACYBPP1,CALCA,CAPN8,CATSPER4,CBLL2,CCD…	R-HSA-1474165	Reproduction	0.0332843
KIRC	ABAT,ABCB11,ACTL6B,ADAM5,ADAMTS16,ADGRF2,AGBL1-AS1,AGR2,AGXT,AIPL1,AK6P2,AKR1B1P6,ALG9-IT1,ALPG,AMBP,AMELX,AMZ2P2,ANKRD20A8P,ANKRD30B,ANXA8,APCDD1L,APOF,AQP6,ARHGAP26-IT1,ARLNC1,ASIC1,ASPDH,ASTN1,ATG9B,ATP2A1-AS1,ATP5PBP7,AURKB,AXDND1,B3GALNT2P1,BAALC-AS2,BASP1,BHMG1,BICD1P1,BIRC8,BNIP3P35,BOLL,BPIFB5P,BPIFC,BRIX1P1,BRWD1P1,C17orf99,C1orf158,C8orf34-AS1,CA1,CACYBPP1,CALCA,CAPN8,CATSPER4,CBLL2,CCD…	R-HSA-2467813	Separation of Sister Chromatids	0.0333601
KIRC	ABAT,ABCB11,ACTL6B,ADAM5,ADAMTS16,ADGRF2,AGBL1-AS1,AGR2,AGXT,AIPL1,AK6P2,AKR1B1P6,ALG9-IT1,ALPG,AMBP,AMELX,AMZ2P2,ANKRD20A8P,ANKRD30B,ANXA8,APCDD1L,APOF,AQP6,ARHGAP26-IT1,ARLNC1,ASIC1,ASPDH,ASTN1,ATG9B,ATP2A1-AS1,ATP5PBP7,AURKB,AXDND1,B3GALNT2P1,BAALC-AS2,BASP1,BHMG1,BICD1P1,BIRC8,BNIP3P35,BOLL,BPIFB5P,BPIFC,BRIX1P1,BRWD1P1,C17orf99,C1orf158,C8orf34-AS1,CA1,CACYBPP1,CALCA,CAPN8,CATSPER4,CBLL2,CCD…	R-HSA-73857	RNA Polymerase II Transcription	0.0359868
KIRC	ABAT,ABCB11,ACTL6B,ADAM5,ADAMTS16,ADGRF2,AGBL1-AS1,AGR2,AGXT,AIPL1,AK6P2,AKR1B1P6,ALG9-IT1,ALPG,AMBP,AMELX,AMZ2P2,ANKRD20A8P,ANKRD30B,ANXA8,APCDD1L,APOF,AQP6,ARHGAP26-IT1,ARLNC1,ASIC1,ASPDH,ASTN1,ATG9B,ATP2A1-AS1,ATP5PBP7,AURKB,AXDND1,B3GALNT2P1,BAALC-AS2,BASP1,BHMG1,BICD1P1,BIRC8,BNIP3P35,BOLL,BPIFB5P,BPIFC,BRIX1P1,BRWD1P1,C17orf99,C1orf158,C8orf34-AS1,CA1,CACYBPP1,CALCA,CAPN8,CATSPER4,CBLL2,CCD…	R-HSA-5663220	RHO GTPases Activate Formins	0.0467047
KIRC	ABAT,ABCB11,ACTL6B,ADAM5,ADAMTS16,ADGRF2,AGBL1-AS1,AGR2,AGXT,AIPL1,AK6P2,AKR1B1P6,ALG9-IT1,ALPG,AMBP,AMELX,AMZ2P2,ANKRD20A8P,ANKRD30B,ANXA8,APCDD1L,APOF,AQP6,ARHGAP26-IT1,ARLNC1,ASIC1,ASPDH,ASTN1,ATG9B,ATP2A1-AS1,ATP5PBP7,AURKB,AXDND1,B3GALNT2P1,BAALC-AS2,BASP1,BHMG1,BICD1P1,BIRC8,BNIP3P35,BOLL,BPIFB5P,BPIFC,BRIX1P1,BRWD1P1,C17orf99,C1orf158,C8orf34-AS1,CA1,CACYBPP1,CALCA,CAPN8,CATSPER4,CBLL2,CCD…	R-HSA-68882	Mitotic Anaphase	0.0498371
LAML	AATK,ABI3BP,ACOXL,ADAMTSL2,ADGRE4P,ADGRL4,ADH1A,ADH4,AKAP8P1,ALB,ALDH1A1,ALDH2,ALOXE3,ALPL,ANK3,ANKEF1,ANKRD18A,ANKRD18DP,ANKRD20A21P,ANKRD20A5P,ANP32BP3,ANXA8,ANXA8L1,APBB2,APLNR,APOE,ARHGAP22,ARHGAP22-IT1,ARHGAP29,ARHGAP42,ARHGEF28,ARHGEF35,ARL2BPP7,ARL4D,ARL5AP2,ASAP3,ATP10D,ATP2B2,AVPR1A,BAG3,BBIP1P1,BBOX1-AS1,BCAM,BGLT3,BIK,BNIP3P11,BRINP2,C1orf115,C1orf116,C1QB,C1QL1,C2CD4C,C3orf56,C5orf64,…	R-HSA-162582	Signal Transduction	3.40396e-07
LAML	AATK,ABI3BP,ACOXL,ADAMTSL2,ADGRE4P,ADGRL4,ADH1A,ADH4,AKAP8P1,ALB,ALDH1A1,ALDH2,ALOXE3,ALPL,ANK3,ANKEF1,ANKRD18A,ANKRD18DP,ANKRD20A21P,ANKRD20A5P,ANP32BP3,ANXA8,ANXA8L1,APBB2,APLNR,APOE,ARHGAP22,ARHGAP22-IT1,ARHGAP29,ARHGAP42,ARHGEF28,ARHGEF35,ARL2BPP7,ARL4D,ARL5AP2,ASAP3,ATP10D,ATP2B2,AVPR1A,BAG3,BBIP1P1,BBOX1-AS1,BCAM,BGLT3,BIK,BNIP3P11,BRINP2,C1orf115,C1orf116,C1QB,C1QL1,C2CD4C,C3orf56,C5orf64,…	R-HSA-109582	Hemostasis	8.862e-07
LAML	AATK,ABI3BP,ACOXL,ADAMTSL2,ADGRE4P,ADGRL4,ADH1A,ADH4,AKAP8P1,ALB,ALDH1A1,ALDH2,ALOXE3,ALPL,ANK3,ANKEF1,ANKRD18A,ANKRD18DP,ANKRD20A21P,ANKRD20A5P,ANP32BP3,ANXA8,ANXA8L1,APBB2,APLNR,APOE,ARHGAP22,ARHGAP22-IT1,ARHGAP29,ARHGAP42,ARHGEF28,ARHGEF35,ARL2BPP7,ARL4D,ARL5AP2,ASAP3,ATP10D,ATP2B2,AVPR1A,BAG3,BBIP1P1,BBOX1-AS1,BCAM,BGLT3,BIK,BNIP3P11,BRINP2,C1orf115,C1orf116,C1QB,C1QL1,C2CD4C,C3orf56,C5orf64,…	R-HSA-2029485	Role of phospholipids in phagocytosis	1.09502e-06
LAML	AATK,ABI3BP,ACOXL,ADAMTSL2,ADGRE4P,ADGRL4,ADH1A,ADH4,AKAP8P1,ALB,ALDH1A1,ALDH2,ALOXE3,ALPL,ANK3,ANKEF1,ANKRD18A,ANKRD18DP,ANKRD20A21P,ANKRD20A5P,ANP32BP3,ANXA8,ANXA8L1,APBB2,APLNR,APOE,ARHGAP22,ARHGAP22-IT1,ARHGAP29,ARHGAP42,ARHGEF28,ARHGEF35,ARL2BPP7,ARL4D,ARL5AP2,ASAP3,ATP10D,ATP2B2,AVPR1A,BAG3,BBIP1P1,BBOX1-AS1,BCAM,BGLT3,BIK,BNIP3P11,BRINP2,C1orf115,C1orf116,C1QB,C1QL1,C2CD4C,C3orf56,C5orf64,…	R-HSA-2173782	Binding and Uptake of Ligands by Scavenger Receptors	3.5383e-06
LAML	AATK,ABI3BP,ACOXL,ADAMTSL2,ADGRE4P,ADGRL4,ADH1A,ADH4,AKAP8P1,ALB,ALDH1A1,ALDH2,ALOXE3,ALPL,ANK3,ANKEF1,ANKRD18A,ANKRD18DP,ANKRD20A21P,ANKRD20A5P,ANP32BP3,ANXA8,ANXA8L1,APBB2,APLNR,APOE,ARHGAP22,ARHGAP22-IT1,ARHGAP29,ARHGAP42,ARHGEF28,ARHGEF35,ARL2BPP7,ARL4D,ARL5AP2,ASAP3,ATP10D,ATP2B2,AVPR1A,BAG3,BBIP1P1,BBOX1-AS1,BCAM,BGLT3,BIK,BNIP3P11,BRINP2,C1orf115,C1orf116,C1QB,C1QL1,C2CD4C,C3orf56,C5orf64,…	R-HSA-2029480	Fcgamma receptor (FCGR) dependent phagocytosis	3.54501e-06
LAML	AATK,ABI3BP,ACOXL,ADAMTSL2,ADGRE4P,ADGRL4,ADH1A,ADH4,AKAP8P1,ALB,ALDH1A1,ALDH2,ALOXE3,ALPL,ANK3,ANKEF1,ANKRD18A,ANKRD18DP,ANKRD20A21P,ANKRD20A5P,ANP32BP3,ANXA8,ANXA8L1,APBB2,APLNR,APOE,ARHGAP22,ARHGAP22-IT1,ARHGAP29,ARHGAP42,ARHGEF28,ARHGEF35,ARL2BPP7,ARL4D,ARL5AP2,ASAP3,ATP10D,ATP2B2,AVPR1A,BAG3,BBIP1P1,BBOX1-AS1,BCAM,BGLT3,BIK,BNIP3P11,BRINP2,C1orf115,C1orf116,C1QB,C1QL1,C2CD4C,C3orf56,C5orf64,…	R-HSA-173623	Classical antibody-mediated complement activation	5.48e-06
LAML	AATK,ABI3BP,ACOXL,ADAMTSL2,ADGRE4P,ADGRL4,ADH1A,ADH4,AKAP8P1,ALB,ALDH1A1,ALDH2,ALOXE3,ALPL,ANK3,ANKEF1,ANKRD18A,ANKRD18DP,ANKRD20A21P,ANKRD20A5P,ANP32BP3,ANXA8,ANXA8L1,APBB2,APLNR,APOE,ARHGAP22,ARHGAP22-IT1,ARHGAP29,ARHGAP42,ARHGEF28,ARHGEF35,ARL2BPP7,ARL4D,ARL5AP2,ASAP3,ATP10D,ATP2B2,AVPR1A,BAG3,BBIP1P1,BBOX1-AS1,BCAM,BGLT3,BIK,BNIP3P11,BRINP2,C1orf115,C1orf116,C1QB,C1QL1,C2CD4C,C3orf56,C5orf64,…	R-HSA-2029481	FCGR activation	9.29908e-06
LAML	AATK,ABI3BP,ACOXL,ADAMTSL2,ADGRE4P,ADGRL4,ADH1A,ADH4,AKAP8P1,ALB,ALDH1A1,ALDH2,ALOXE3,ALPL,ANK3,ANKEF1,ANKRD18A,ANKRD18DP,ANKRD20A21P,ANKRD20A5P,ANP32BP3,ANXA8,ANXA8L1,APBB2,APLNR,APOE,ARHGAP22,ARHGAP22-IT1,ARHGAP29,ARHGAP42,ARHGEF28,ARHGEF35,ARL2BPP7,ARL4D,ARL5AP2,ASAP3,ATP10D,ATP2B2,AVPR1A,BAG3,BBIP1P1,BBOX1-AS1,BCAM,BGLT3,BIK,BNIP3P11,BRINP2,C1orf115,C1orf116,C1QB,C1QL1,C2CD4C,C3orf56,C5orf64,…	R-HSA-166786	Creation of C4 and C2 activators	1.10024e-05
LAML	AATK,ABI3BP,ACOXL,ADAMTSL2,ADGRE4P,ADGRL4,ADH1A,ADH4,AKAP8P1,ALB,ALDH1A1,ALDH2,ALOXE3,ALPL,ANK3,ANKEF1,ANKRD18A,ANKRD18DP,ANKRD20A21P,ANKRD20A5P,ANP32BP3,ANXA8,ANXA8L1,APBB2,APLNR,APOE,ARHGAP22,ARHGAP22-IT1,ARHGAP29,ARHGAP42,ARHGEF28,ARHGEF35,ARL2BPP7,ARL4D,ARL5AP2,ASAP3,ATP10D,ATP2B2,AVPR1A,BAG3,BBIP1P1,BBOX1-AS1,BCAM,BGLT3,BIK,BNIP3P11,BRINP2,C1orf115,C1orf116,C1QB,C1QL1,C2CD4C,C3orf56,C5orf64,…	R-HSA-168256	Immune System	1.1425e-05
LAML	AATK,ABI3BP,ACOXL,ADAMTSL2,ADGRE4P,ADGRL4,ADH1A,ADH4,AKAP8P1,ALB,ALDH1A1,ALDH2,ALOXE3,ALPL,ANK3,ANKEF1,ANKRD18A,ANKRD18DP,ANKRD20A21P,ANKRD20A5P,ANP32BP3,ANXA8,ANXA8L1,APBB2,APLNR,APOE,ARHGAP22,ARHGAP22-IT1,ARHGAP29,ARHGAP42,ARHGEF28,ARHGEF35,ARL2BPP7,ARL4D,ARL5AP2,ASAP3,ATP10D,ATP2B2,AVPR1A,BAG3,BBIP1P1,BBOX1-AS1,BCAM,BGLT3,BIK,BNIP3P11,BRINP2,C1orf115,C1orf116,C1QB,C1QL1,C2CD4C,C3orf56,C5orf64,…	R-HSA-2029482	Regulation of actin dynamics for phagocytic cup formation	1.43885e-05
LAML	AATK,ABI3BP,ACOXL,ADAMTSL2,ADGRE4P,ADGRL4,ADH1A,ADH4,AKAP8P1,ALB,ALDH1A1,ALDH2,ALOXE3,ALPL,ANK3,ANKEF1,ANKRD18A,ANKRD18DP,ANKRD20A21P,ANKRD20A5P,ANP32BP3,ANXA8,ANXA8L1,APBB2,APLNR,APOE,ARHGAP22,ARHGAP22-IT1,ARHGAP29,ARHGAP42,ARHGEF28,ARHGEF35,ARL2BPP7,ARL4D,ARL5AP2,ASAP3,ATP10D,ATP2B2,AVPR1A,BAG3,BBIP1P1,BBOX1-AS1,BCAM,BGLT3,BIK,BNIP3P11,BRINP2,C1orf115,C1orf116,C1QB,C1QL1,C2CD4C,C3orf56,C5orf64,…	R-HSA-5653656	Vesicle-mediated transport	1.58826e-05
LAML	AATK,ABI3BP,ACOXL,ADAMTSL2,ADGRE4P,ADGRL4,ADH1A,ADH4,AKAP8P1,ALB,ALDH1A1,ALDH2,ALOXE3,ALPL,ANK3,ANKEF1,ANKRD18A,ANKRD18DP,ANKRD20A21P,ANKRD20A5P,ANP32BP3,ANXA8,ANXA8L1,APBB2,APLNR,APOE,ARHGAP22,ARHGAP22-IT1,ARHGAP29,ARHGAP42,ARHGEF28,ARHGEF35,ARL2BPP7,ARL4D,ARL5AP2,ASAP3,ATP10D,ATP2B2,AVPR1A,BAG3,BBIP1P1,BBOX1-AS1,BCAM,BGLT3,BIK,BNIP3P11,BRINP2,C1orf115,C1orf116,C1QB,C1QL1,C2CD4C,C3orf56,C5orf64,…	R-HSA-166663	Initial triggering of complement	1.92652e-05
LAML	AATK,ABI3BP,ACOXL,ADAMTSL2,ADGRE4P,ADGRL4,ADH1A,ADH4,AKAP8P1,ALB,ALDH1A1,ALDH2,ALOXE3,ALPL,ANK3,ANKEF1,ANKRD18A,ANKRD18DP,ANKRD20A21P,ANKRD20A5P,ANP32BP3,ANXA8,ANXA8L1,APBB2,APLNR,APOE,ARHGAP22,ARHGAP22-IT1,ARHGAP29,ARHGAP42,ARHGEF28,ARHGEF35,ARL2BPP7,ARL4D,ARL5AP2,ASAP3,ATP10D,ATP2B2,AVPR1A,BAG3,BBIP1P1,BBOX1-AS1,BCAM,BGLT3,BIK,BNIP3P11,BRINP2,C1orf115,C1orf116,C1QB,C1QL1,C2CD4C,C3orf56,C5orf64,…	R-HSA-198933	Immunoregulatory interactions between a Lymphoid and a non-Lymphoid cell	4.12001e-05
LAML	AATK,ABI3BP,ACOXL,ADAMTSL2,ADGRE4P,ADGRL4,ADH1A,ADH4,AKAP8P1,ALB,ALDH1A1,ALDH2,ALOXE3,ALPL,ANK3,ANKEF1,ANKRD18A,ANKRD18DP,ANKRD20A21P,ANKRD20A5P,ANP32BP3,ANXA8,ANXA8L1,APBB2,APLNR,APOE,ARHGAP22,ARHGAP22-IT1,ARHGAP29,ARHGAP42,ARHGEF28,ARHGEF35,ARL2BPP7,ARL4D,ARL5AP2,ASAP3,ATP10D,ATP2B2,AVPR1A,BAG3,BBIP1P1,BBOX1-AS1,BCAM,BGLT3,BIK,BNIP3P11,BRINP2,C1orf115,C1orf116,C1QB,C1QL1,C2CD4C,C3orf56,C5orf64,…	R-HSA-381426	Regulation of Insulin-like Growth Factor (IGF) transport and uptake by Insulin-like Growth Factor Binding Proteins (IGFBPs)	8.3074e-05
LAML	AATK,ABI3BP,ACOXL,ADAMTSL2,ADGRE4P,ADGRL4,ADH1A,ADH4,AKAP8P1,ALB,ALDH1A1,ALDH2,ALOXE3,ALPL,ANK3,ANKEF1,ANKRD18A,ANKRD18DP,ANKRD20A21P,ANKRD20A5P,ANP32BP3,ANXA8,ANXA8L1,APBB2,APLNR,APOE,ARHGAP22,ARHGAP22-IT1,ARHGAP29,ARHGAP42,ARHGEF28,ARHGEF35,ARL2BPP7,ARL4D,ARL5AP2,ASAP3,ATP10D,ATP2B2,AVPR1A,BAG3,BBIP1P1,BBOX1-AS1,BCAM,BGLT3,BIK,BNIP3P11,BRINP2,C1orf115,C1orf116,C1QB,C1QL1,C2CD4C,C3orf56,C5orf64,…	R-HSA-977606	Regulation of Complement cascade	0.00010012
LAML	AATK,ABI3BP,ACOXL,ADAMTSL2,ADGRE4P,ADGRL4,ADH1A,ADH4,AKAP8P1,ALB,ALDH1A1,ALDH2,ALOXE3,ALPL,ANK3,ANKEF1,ANKRD18A,ANKRD18DP,ANKRD20A21P,ANKRD20A5P,ANP32BP3,ANXA8,ANXA8L1,APBB2,APLNR,APOE,ARHGAP22,ARHGAP22-IT1,ARHGAP29,ARHGAP42,ARHGEF28,ARHGEF35,ARL2BPP7,ARL4D,ARL5AP2,ASAP3,ATP10D,ATP2B2,AVPR1A,BAG3,BBIP1P1,BBOX1-AS1,BCAM,BGLT3,BIK,BNIP3P11,BRINP2,C1orf115,C1orf116,C1QB,C1QL1,C2CD4C,C3orf56,C5orf64,…	R-HSA-1474290	Collagen formation	0.000165266
LAML	AATK,ABI3BP,ACOXL,ADAMTSL2,ADGRE4P,ADGRL4,ADH1A,ADH4,AKAP8P1,ALB,ALDH1A1,ALDH2,ALOXE3,ALPL,ANK3,ANKEF1,ANKRD18A,ANKRD18DP,ANKRD20A21P,ANKRD20A5P,ANP32BP3,ANXA8,ANXA8L1,APBB2,APLNR,APOE,ARHGAP22,ARHGAP22-IT1,ARHGAP29,ARHGAP42,ARHGEF28,ARHGEF35,ARL2BPP7,ARL4D,ARL5AP2,ASAP3,ATP10D,ATP2B2,AVPR1A,BAG3,BBIP1P1,BBOX1-AS1,BCAM,BGLT3,BIK,BNIP3P11,BRINP2,C1orf115,C1orf116,C1QB,C1QL1,C2CD4C,C3orf56,C5orf64,…	R-HSA-166658	Complement cascade	0.000190931
LAML	AATK,ABI3BP,ACOXL,ADAMTSL2,ADGRE4P,ADGRL4,ADH1A,ADH4,AKAP8P1,ALB,ALDH1A1,ALDH2,ALOXE3,ALPL,ANK3,ANKEF1,ANKRD18A,ANKRD18DP,ANKRD20A21P,ANKRD20A5P,ANP32BP3,ANXA8,ANXA8L1,APBB2,APLNR,APOE,ARHGAP22,ARHGAP22-IT1,ARHGAP29,ARHGAP42,ARHGEF28,ARHGEF35,ARL2BPP7,ARL4D,ARL5AP2,ASAP3,ATP10D,ATP2B2,AVPR1A,BAG3,BBIP1P1,BBOX1-AS1,BCAM,BGLT3,BIK,BNIP3P11,BRINP2,C1orf115,C1orf116,C1QB,C1QL1,C2CD4C,C3orf56,C5orf64,…	R-HSA-2168880	Scavenging of heme from plasma	0.000192491
LAML	AATK,ABI3BP,ACOXL,ADAMTSL2,ADGRE4P,ADGRL4,ADH1A,ADH4,AKAP8P1,ALB,ALDH1A1,ALDH2,ALOXE3,ALPL,ANK3,ANKEF1,ANKRD18A,ANKRD18DP,ANKRD20A21P,ANKRD20A5P,ANP32BP3,ANXA8,ANXA8L1,APBB2,APLNR,APOE,ARHGAP22,ARHGAP22-IT1,ARHGAP29,ARHGAP42,ARHGEF28,ARHGEF35,ARL2BPP7,ARL4D,ARL5AP2,ASAP3,ATP10D,ATP2B2,AVPR1A,BAG3,BBIP1P1,BBOX1-AS1,BCAM,BGLT3,BIK,BNIP3P11,BRINP2,C1orf115,C1orf116,C1QB,C1QL1,C2CD4C,C3orf56,C5orf64,…	R-HSA-71384	Ethanol oxidation	0.000247569
LAML	AATK,ABI3BP,ACOXL,ADAMTSL2,ADGRE4P,ADGRL4,ADH1A,ADH4,AKAP8P1,ALB,ALDH1A1,ALDH2,ALOXE3,ALPL,ANK3,ANKEF1,ANKRD18A,ANKRD18DP,ANKRD20A21P,ANKRD20A5P,ANP32BP3,ANXA8,ANXA8L1,APBB2,APLNR,APOE,ARHGAP22,ARHGAP22-IT1,ARHGAP29,ARHGAP42,ARHGEF28,ARHGEF35,ARL2BPP7,ARL4D,ARL5AP2,ASAP3,ATP10D,ATP2B2,AVPR1A,BAG3,BBIP1P1,BBOX1-AS1,BCAM,BGLT3,BIK,BNIP3P11,BRINP2,C1orf115,C1orf116,C1QB,C1QL1,C2CD4C,C3orf56,C5orf64,…	R-HSA-1650814	Collagen biosynthesis and modifying enzymes	0.000621276
LAML	AATK,ABI3BP,ACOXL,ADAMTSL2,ADGRE4P,ADGRL4,ADH1A,ADH4,AKAP8P1,ALB,ALDH1A1,ALDH2,ALOXE3,ALPL,ANK3,ANKEF1,ANKRD18A,ANKRD18DP,ANKRD20A21P,ANKRD20A5P,ANP32BP3,ANXA8,ANXA8L1,APBB2,APLNR,APOE,ARHGAP22,ARHGAP22-IT1,ARHGAP29,ARHGAP42,ARHGEF28,ARHGEF35,ARL2BPP7,ARL4D,ARL5AP2,ASAP3,ATP10D,ATP2B2,AVPR1A,BAG3,BBIP1P1,BBOX1-AS1,BCAM,BGLT3,BIK,BNIP3P11,BRINP2,C1orf115,C1orf116,C1QB,C1QL1,C2CD4C,C3orf56,C5orf64,…	R-HSA-1474244	Extracellular matrix organization	0.000740826
LAML	AATK,ABI3BP,ACOXL,ADAMTSL2,ADGRE4P,ADGRL4,ADH1A,ADH4,AKAP8P1,ALB,ALDH1A1,ALDH2,ALOXE3,ALPL,ANK3,ANKEF1,ANKRD18A,ANKRD18DP,ANKRD20A21P,ANKRD20A5P,ANP32BP3,ANXA8,ANXA8L1,APBB2,APLNR,APOE,ARHGAP22,ARHGAP22-IT1,ARHGAP29,ARHGAP42,ARHGEF28,ARHGEF35,ARL2BPP7,ARL4D,ARL5AP2,ASAP3,ATP10D,ATP2B2,AVPR1A,BAG3,BBIP1P1,BBOX1-AS1,BCAM,BGLT3,BIK,BNIP3P11,BRINP2,C1orf115,C1orf116,C1QB,C1QL1,C2CD4C,C3orf56,C5orf64,…	R-HSA-5690714	CD22 mediated BCR regulation	0.000808258
LAML	AATK,ABI3BP,ACOXL,ADAMTSL2,ADGRE4P,ADGRL4,ADH1A,ADH4,AKAP8P1,ALB,ALDH1A1,ALDH2,ALOXE3,ALPL,ANK3,ANKEF1,ANKRD18A,ANKRD18DP,ANKRD20A21P,ANKRD20A5P,ANP32BP3,ANXA8,ANXA8L1,APBB2,APLNR,APOE,ARHGAP22,ARHGAP22-IT1,ARHGAP29,ARHGAP42,ARHGEF28,ARHGEF35,ARL2BPP7,ARL4D,ARL5AP2,ASAP3,ATP10D,ATP2B2,AVPR1A,BAG3,BBIP1P1,BBOX1-AS1,BCAM,BGLT3,BIK,BNIP3P11,BRINP2,C1orf115,C1orf116,C1QB,C1QL1,C2CD4C,C3orf56,C5orf64,…	R-HSA-202733	Cell surface interactions at the vascular wall	0.000880746
LAML	AATK,ABI3BP,ACOXL,ADAMTSL2,ADGRE4P,ADGRL4,ADH1A,ADH4,AKAP8P1,ALB,ALDH1A1,ALDH2,ALOXE3,ALPL,ANK3,ANKEF1,ANKRD18A,ANKRD18DP,ANKRD20A21P,ANKRD20A5P,ANP32BP3,ANXA8,ANXA8L1,APBB2,APLNR,APOE,ARHGAP22,ARHGAP22-IT1,ARHGAP29,ARHGAP42,ARHGEF28,ARHGEF35,ARL2BPP7,ARL4D,ARL5AP2,ASAP3,ATP10D,ATP2B2,AVPR1A,BAG3,BBIP1P1,BBOX1-AS1,BCAM,BGLT3,BIK,BNIP3P11,BRINP2,C1orf115,C1orf116,C1QB,C1QL1,C2CD4C,C3orf56,C5orf64,…	R-HSA-1430728	Metabolism	0.000885236
LAML	AATK,ABI3BP,ACOXL,ADAMTSL2,ADGRE4P,ADGRL4,ADH1A,ADH4,AKAP8P1,ALB,ALDH1A1,ALDH2,ALOXE3,ALPL,ANK3,ANKEF1,ANKRD18A,ANKRD18DP,ANKRD20A21P,ANKRD20A5P,ANP32BP3,ANXA8,ANXA8L1,APBB2,APLNR,APOE,ARHGAP22,ARHGAP22-IT1,ARHGAP29,ARHGAP42,ARHGEF28,ARHGEF35,ARL2BPP7,ARL4D,ARL5AP2,ASAP3,ATP10D,ATP2B2,AVPR1A,BAG3,BBIP1P1,BBOX1-AS1,BCAM,BGLT3,BIK,BNIP3P11,BRINP2,C1orf115,C1orf116,C1QB,C1QL1,C2CD4C,C3orf56,C5orf64,…	R-HSA-372790	Signaling by GPCR	0.00109563
LAML	AATK,ABI3BP,ACOXL,ADAMTSL2,ADGRE4P,ADGRL4,ADH1A,ADH4,AKAP8P1,ALB,ALDH1A1,ALDH2,ALOXE3,ALPL,ANK3,ANKEF1,ANKRD18A,ANKRD18DP,ANKRD20A21P,ANKRD20A5P,ANP32BP3,ANXA8,ANXA8L1,APBB2,APLNR,APOE,ARHGAP22,ARHGAP22-IT1,ARHGAP29,ARHGAP42,ARHGEF28,ARHGEF35,ARL2BPP7,ARL4D,ARL5AP2,ASAP3,ATP10D,ATP2B2,AVPR1A,BAG3,BBIP1P1,BBOX1-AS1,BCAM,BGLT3,BIK,BNIP3P11,BRINP2,C1orf115,C1orf116,C1QB,C1QL1,C2CD4C,C3orf56,C5orf64,…	R-HSA-1442490	Collagen degradation	0.00116296
LAML	AATK,ABI3BP,ACOXL,ADAMTSL2,ADGRE4P,ADGRL4,ADH1A,ADH4,AKAP8P1,ALB,ALDH1A1,ALDH2,ALOXE3,ALPL,ANK3,ANKEF1,ANKRD18A,ANKRD18DP,ANKRD20A21P,ANKRD20A5P,ANP32BP3,ANXA8,ANXA8L1,APBB2,APLNR,APOE,ARHGAP22,ARHGAP22-IT1,ARHGAP29,ARHGAP42,ARHGEF28,ARHGEF35,ARL2BPP7,ARL4D,ARL5AP2,ASAP3,ATP10D,ATP2B2,AVPR1A,BAG3,BBIP1P1,BBOX1-AS1,BCAM,BGLT3,BIK,BNIP3P11,BRINP2,C1orf115,C1orf116,C1QB,C1QL1,C2CD4C,C3orf56,C5orf64,…	R-HSA-392499	Metabolism of proteins	0.00123543
LAML	AATK,ABI3BP,ACOXL,ADAMTSL2,ADGRE4P,ADGRL4,ADH1A,ADH4,AKAP8P1,ALB,ALDH1A1,ALDH2,ALOXE3,ALPL,ANK3,ANKEF1,ANKRD18A,ANKRD18DP,ANKRD20A21P,ANKRD20A5P,ANP32BP3,ANXA8,ANXA8L1,APBB2,APLNR,APOE,ARHGAP22,ARHGAP22-IT1,ARHGAP29,ARHGAP42,ARHGEF28,ARHGEF35,ARL2BPP7,ARL4D,ARL5AP2,ASAP3,ATP10D,ATP2B2,AVPR1A,BAG3,BBIP1P1,BBOX1-AS1,BCAM,BGLT3,BIK,BNIP3P11,BRINP2,C1orf115,C1orf116,C1QB,C1QL1,C2CD4C,C3orf56,C5orf64,…	R-HSA-388396	GPCR downstream signalling	0.00203716
LAML	AATK,ABI3BP,ACOXL,ADAMTSL2,ADGRE4P,ADGRL4,ADH1A,ADH4,AKAP8P1,ALB,ALDH1A1,ALDH2,ALOXE3,ALPL,ANK3,ANKEF1,ANKRD18A,ANKRD18DP,ANKRD20A21P,ANKRD20A5P,ANP32BP3,ANXA8,ANXA8L1,APBB2,APLNR,APOE,ARHGAP22,ARHGAP22-IT1,ARHGAP29,ARHGAP42,ARHGEF28,ARHGEF35,ARL2BPP7,ARL4D,ARL5AP2,ASAP3,ATP10D,ATP2B2,AVPR1A,BAG3,BBIP1P1,BBOX1-AS1,BCAM,BGLT3,BIK,BNIP3P11,BRINP2,C1orf115,C1orf116,C1QB,C1QL1,C2CD4C,C3orf56,C5orf64,…	R-HSA-2730905	Role of LAT2/NTAL/LAB on calcium mobilization	0.0040896
LAML	AATK,ABI3BP,ACOXL,ADAMTSL2,ADGRE4P,ADGRL4,ADH1A,ADH4,AKAP8P1,ALB,ALDH1A1,ALDH2,ALOXE3,ALPL,ANK3,ANKEF1,ANKRD18A,ANKRD18DP,ANKRD20A21P,ANKRD20A5P,ANP32BP3,ANXA8,ANXA8L1,APBB2,APLNR,APOE,ARHGAP22,ARHGAP22-IT1,ARHGAP29,ARHGAP42,ARHGEF28,ARHGEF35,ARL2BPP7,ARL4D,ARL5AP2,ASAP3,ATP10D,ATP2B2,AVPR1A,BAG3,BBIP1P1,BBOX1-AS1,BCAM,BGLT3,BIK,BNIP3P11,BRINP2,C1orf115,C1orf116,C1QB,C1QL1,C2CD4C,C3orf56,C5orf64,…	R-HSA-983695	Antigen activates B Cell Receptor (BCR) leading to generation of second messengers	0.00493574
LAML	AATK,ABI3BP,ACOXL,ADAMTSL2,ADGRE4P,ADGRL4,ADH1A,ADH4,AKAP8P1,ALB,ALDH1A1,ALDH2,ALOXE3,ALPL,ANK3,ANKEF1,ANKRD18A,ANKRD18DP,ANKRD20A21P,ANKRD20A5P,ANP32BP3,ANXA8,ANXA8L1,APBB2,APLNR,APOE,ARHGAP22,ARHGAP22-IT1,ARHGAP29,ARHGAP42,ARHGEF28,ARHGEF35,ARL2BPP7,ARL4D,ARL5AP2,ASAP3,ATP10D,ATP2B2,AVPR1A,BAG3,BBIP1P1,BBOX1-AS1,BCAM,BGLT3,BIK,BNIP3P11,BRINP2,C1orf115,C1orf116,C1QB,C1QL1,C2CD4C,C3orf56,C5orf64,…	R-HSA-500792	GPCR ligand binding	0.0065302
LAML	AATK,ABI3BP,ACOXL,ADAMTSL2,ADGRE4P,ADGRL4,ADH1A,ADH4,AKAP8P1,ALB,ALDH1A1,ALDH2,ALOXE3,ALPL,ANK3,ANKEF1,ANKRD18A,ANKRD18DP,ANKRD20A21P,ANKRD20A5P,ANP32BP3,ANXA8,ANXA8L1,APBB2,APLNR,APOE,ARHGAP22,ARHGAP22-IT1,ARHGAP29,ARHGAP42,ARHGEF28,ARHGEF35,ARL2BPP7,ARL4D,ARL5AP2,ASAP3,ATP10D,ATP2B2,AVPR1A,BAG3,BBIP1P1,BBOX1-AS1,BCAM,BGLT3,BIK,BNIP3P11,BRINP2,C1orf115,C1orf116,C1QB,C1QL1,C2CD4C,C3orf56,C5orf64,…	R-HSA-168249	Innate Immune System	0.0078322
LAML	AATK,ABI3BP,ACOXL,ADAMTSL2,ADGRE4P,ADGRL4,ADH1A,ADH4,AKAP8P1,ALB,ALDH1A1,ALDH2,ALOXE3,ALPL,ANK3,ANKEF1,ANKRD18A,ANKRD18DP,ANKRD20A21P,ANKRD20A5P,ANP32BP3,ANXA8,ANXA8L1,APBB2,APLNR,APOE,ARHGAP22,ARHGAP22-IT1,ARHGAP29,ARHGAP42,ARHGEF28,ARHGEF35,ARL2BPP7,ARL4D,ARL5AP2,ASAP3,ATP10D,ATP2B2,AVPR1A,BAG3,BBIP1P1,BBOX1-AS1,BCAM,BGLT3,BIK,BNIP3P11,BRINP2,C1orf115,C1orf116,C1QB,C1QL1,C2CD4C,C3orf56,C5orf64,…	R-HSA-2871809	FCERI mediated Ca+2 mobilization	0.0098678
LAML	AATK,ABI3BP,ACOXL,ADAMTSL2,ADGRE4P,ADGRL4,ADH1A,ADH4,AKAP8P1,ALB,ALDH1A1,ALDH2,ALOXE3,ALPL,ANK3,ANKEF1,ANKRD18A,ANKRD18DP,ANKRD20A21P,ANKRD20A5P,ANP32BP3,ANXA8,ANXA8L1,APBB2,APLNR,APOE,ARHGAP22,ARHGAP22-IT1,ARHGAP29,ARHGAP42,ARHGEF28,ARHGEF35,ARL2BPP7,ARL4D,ARL5AP2,ASAP3,ATP10D,ATP2B2,AVPR1A,BAG3,BBIP1P1,BBOX1-AS1,BCAM,BGLT3,BIK,BNIP3P11,BRINP2,C1orf115,C1orf116,C1QB,C1QL1,C2CD4C,C3orf56,C5orf64,…	R-HSA-8957275	Post-translational protein phosphorylation	0.0098678
LAML	AATK,ABI3BP,ACOXL,ADAMTSL2,ADGRE4P,ADGRL4,ADH1A,ADH4,AKAP8P1,ALB,ALDH1A1,ALDH2,ALOXE3,ALPL,ANK3,ANKEF1,ANKRD18A,ANKRD18DP,ANKRD20A21P,ANKRD20A5P,ANP32BP3,ANXA8,ANXA8L1,APBB2,APLNR,APOE,ARHGAP22,ARHGAP22-IT1,ARHGAP29,ARHGAP42,ARHGEF28,ARHGEF35,ARL2BPP7,ARL4D,ARL5AP2,ASAP3,ATP10D,ATP2B2,AVPR1A,BAG3,BBIP1P1,BBOX1-AS1,BCAM,BGLT3,BIK,BNIP3P11,BRINP2,C1orf115,C1orf116,C1QB,C1QL1,C2CD4C,C3orf56,C5orf64,…	R-HSA-2871796	FCERI mediated MAPK activation	0.0104141
LAML	AATK,ABI3BP,ACOXL,ADAMTSL2,ADGRE4P,ADGRL4,ADH1A,ADH4,AKAP8P1,ALB,ALDH1A1,ALDH2,ALOXE3,ALPL,ANK3,ANKEF1,ANKRD18A,ANKRD18DP,ANKRD20A21P,ANKRD20A5P,ANP32BP3,ANXA8,ANXA8L1,APBB2,APLNR,APOE,ARHGAP22,ARHGAP22-IT1,ARHGAP29,ARHGAP42,ARHGEF28,ARHGEF35,ARL2BPP7,ARL4D,ARL5AP2,ASAP3,ATP10D,ATP2B2,AVPR1A,BAG3,BBIP1P1,BBOX1-AS1,BCAM,BGLT3,BIK,BNIP3P11,BRINP2,C1orf115,C1orf116,C1QB,C1QL1,C2CD4C,C3orf56,C5orf64,…	R-HSA-418594	G alpha (i) signalling events	0.0119521
LAML	AATK,ABI3BP,ACOXL,ADAMTSL2,ADGRE4P,ADGRL4,ADH1A,ADH4,AKAP8P1,ALB,ALDH1A1,ALDH2,ALOXE3,ALPL,ANK3,ANKEF1,ANKRD18A,ANKRD18DP,ANKRD20A21P,ANKRD20A5P,ANP32BP3,ANXA8,ANXA8L1,APBB2,APLNR,APOE,ARHGAP22,ARHGAP22-IT1,ARHGAP29,ARHGAP42,ARHGEF28,ARHGEF35,ARL2BPP7,ARL4D,ARL5AP2,ASAP3,ATP10D,ATP2B2,AVPR1A,BAG3,BBIP1P1,BBOX1-AS1,BCAM,BGLT3,BIK,BNIP3P11,BRINP2,C1orf115,C1orf116,C1QB,C1QL1,C2CD4C,C3orf56,C5orf64,…	R-HSA-5173105	O-linked glycosylation	0.0142318
LAML	AATK,ABI3BP,ACOXL,ADAMTSL2,ADGRE4P,ADGRL4,ADH1A,ADH4,AKAP8P1,ALB,ALDH1A1,ALDH2,ALOXE3,ALPL,ANK3,ANKEF1,ANKRD18A,ANKRD18DP,ANKRD20A21P,ANKRD20A5P,ANP32BP3,ANXA8,ANXA8L1,APBB2,APLNR,APOE,ARHGAP22,ARHGAP22-IT1,ARHGAP29,ARHGAP42,ARHGEF28,ARHGEF35,ARL2BPP7,ARL4D,ARL5AP2,ASAP3,ATP10D,ATP2B2,AVPR1A,BAG3,BBIP1P1,BBOX1-AS1,BCAM,BGLT3,BIK,BNIP3P11,BRINP2,C1orf115,C1orf116,C1QB,C1QL1,C2CD4C,C3orf56,C5orf64,…	R-HSA-382551	Transport of small molecules	0.0157855
LAML	AATK,ABI3BP,ACOXL,ADAMTSL2,ADGRE4P,ADGRL4,ADH1A,ADH4,AKAP8P1,ALB,ALDH1A1,ALDH2,ALOXE3,ALPL,ANK3,ANKEF1,ANKRD18A,ANKRD18DP,ANKRD20A21P,ANKRD20A5P,ANP32BP3,ANXA8,ANXA8L1,APBB2,APLNR,APOE,ARHGAP22,ARHGAP22-IT1,ARHGAP29,ARHGAP42,ARHGEF28,ARHGEF35,ARL2BPP7,ARL4D,ARL5AP2,ASAP3,ATP10D,ATP2B2,AVPR1A,BAG3,BBIP1P1,BBOX1-AS1,BCAM,BGLT3,BIK,BNIP3P11,BRINP2,C1orf115,C1orf116,C1QB,C1QL1,C2CD4C,C3orf56,C5orf64,…	R-HSA-8978868	Fatty acid metabolism	0.015846
LAML	AATK,ABI3BP,ACOXL,ADAMTSL2,ADGRE4P,ADGRL4,ADH1A,ADH4,AKAP8P1,ALB,ALDH1A1,ALDH2,ALOXE3,ALPL,ANK3,ANKEF1,ANKRD18A,ANKRD18DP,ANKRD20A21P,ANKRD20A5P,ANP32BP3,ANXA8,ANXA8L1,APBB2,APLNR,APOE,ARHGAP22,ARHGAP22-IT1,ARHGAP29,ARHGAP42,ARHGEF28,ARHGEF35,ARL2BPP7,ARL4D,ARL5AP2,ASAP3,ATP10D,ATP2B2,AVPR1A,BAG3,BBIP1P1,BBOX1-AS1,BCAM,BGLT3,BIK,BNIP3P11,BRINP2,C1orf115,C1orf116,C1QB,C1QL1,C2CD4C,C3orf56,C5orf64,…	R-HSA-879518	Transport of organic anions	0.0284205
LAML	AATK,ABI3BP,ACOXL,ADAMTSL2,ADGRE4P,ADGRL4,ADH1A,ADH4,AKAP8P1,ALB,ALDH1A1,ALDH2,ALOXE3,ALPL,ANK3,ANKEF1,ANKRD18A,ANKRD18DP,ANKRD20A21P,ANKRD20A5P,ANP32BP3,ANXA8,ANXA8L1,APBB2,APLNR,APOE,ARHGAP22,ARHGAP22-IT1,ARHGAP29,ARHGAP42,ARHGEF28,ARHGEF35,ARL2BPP7,ARL4D,ARL5AP2,ASAP3,ATP10D,ATP2B2,AVPR1A,BAG3,BBIP1P1,BBOX1-AS1,BCAM,BGLT3,BIK,BNIP3P11,BRINP2,C1orf115,C1orf116,C1QB,C1QL1,C2CD4C,C3orf56,C5orf64,…	R-HSA-9006931	Signaling by Nuclear Receptors	0.0306533
LAML	AATK,ABI3BP,ACOXL,ADAMTSL2,ADGRE4P,ADGRL4,ADH1A,ADH4,AKAP8P1,ALB,ALDH1A1,ALDH2,ALOXE3,ALPL,ANK3,ANKEF1,ANKRD18A,ANKRD18DP,ANKRD20A21P,ANKRD20A5P,ANP32BP3,ANXA8,ANXA8L1,APBB2,APLNR,APOE,ARHGAP22,ARHGAP22-IT1,ARHGAP29,ARHGAP42,ARHGEF28,ARHGEF35,ARL2BPP7,ARL4D,ARL5AP2,ASAP3,ATP10D,ATP2B2,AVPR1A,BAG3,BBIP1P1,BBOX1-AS1,BCAM,BGLT3,BIK,BNIP3P11,BRINP2,C1orf115,C1orf116,C1QB,C1QL1,C2CD4C,C3orf56,C5orf64,…	R-HSA-597592	Post-translational protein modification	0.0310616
LAML	AATK,ABI3BP,ACOXL,ADAMTSL2,ADGRE4P,ADGRL4,ADH1A,ADH4,AKAP8P1,ALB,ALDH1A1,ALDH2,ALOXE3,ALPL,ANK3,ANKEF1,ANKRD18A,ANKRD18DP,ANKRD20A21P,ANKRD20A5P,ANP32BP3,ANXA8,ANXA8L1,APBB2,APLNR,APOE,ARHGAP22,ARHGAP22-IT1,ARHGAP29,ARHGAP42,ARHGEF28,ARHGEF35,ARL2BPP7,ARL4D,ARL5AP2,ASAP3,ATP10D,ATP2B2,AVPR1A,BAG3,BBIP1P1,BBOX1-AS1,BCAM,BGLT3,BIK,BNIP3P11,BRINP2,C1orf115,C1orf116,C1QB,C1QL1,C2CD4C,C3orf56,C5orf64,…	R-HSA-194840	Rho GTPase cycle	0.0478702
LGG	ACBD3-AS1,ACOT11,ADRA2B,ALKAL1,ANKRD66,AQP7P1,ASB12,BCRP9,BUB1B,C11orf88,C11orf97,C20orf85,C7orf65,C8orf34,C8orf34-AS1,CA3,CACNA1H,CAPSL,CCDC140,CCDC144NL,CCL18,CCL3L1,CCL3L3,CCL4L2,CCT2,CD207,CFAP299,CFAP45,CFAP57,CHRNB3,COL1A2,COL21A1,CRH,CXCL10,CXCL11,CXCL8,DAW1,DISC1FP1,DNMT3L,DUOX1,ECRG4,EN2,FAM153CP,FAM160A1-DT,FAM216B,FNDC1,FRG2DP,G6PC2,GABRE,GALNT5,GDI2P1,GGT8P,GLI1,GPR1,GPR157,GPR52,HCCA…	R-HSA-375276	Peptide ligand-binding receptors	2.49894e-08
LGG	ACBD3-AS1,ACOT11,ADRA2B,ALKAL1,ANKRD66,AQP7P1,ASB12,BCRP9,BUB1B,C11orf88,C11orf97,C20orf85,C7orf65,C8orf34,C8orf34-AS1,CA3,CACNA1H,CAPSL,CCDC140,CCDC144NL,CCL18,CCL3L1,CCL3L3,CCL4L2,CCT2,CD207,CFAP299,CFAP45,CFAP57,CHRNB3,COL1A2,COL21A1,CRH,CXCL10,CXCL11,CXCL8,DAW1,DISC1FP1,DNMT3L,DUOX1,ECRG4,EN2,FAM153CP,FAM160A1-DT,FAM216B,FNDC1,FRG2DP,G6PC2,GABRE,GALNT5,GDI2P1,GGT8P,GLI1,GPR1,GPR157,GPR52,HCCA…	R-HSA-373076	Class A/1 (Rhodopsin-like receptors)	1.03161e-07
LGG	ACBD3-AS1,ACOT11,ADRA2B,ALKAL1,ANKRD66,AQP7P1,ASB12,BCRP9,BUB1B,C11orf88,C11orf97,C20orf85,C7orf65,C8orf34,C8orf34-AS1,CA3,CACNA1H,CAPSL,CCDC140,CCDC144NL,CCL18,CCL3L1,CCL3L3,CCL4L2,CCT2,CD207,CFAP299,CFAP45,CFAP57,CHRNB3,COL1A2,COL21A1,CRH,CXCL10,CXCL11,CXCL8,DAW1,DISC1FP1,DNMT3L,DUOX1,ECRG4,EN2,FAM153CP,FAM160A1-DT,FAM216B,FNDC1,FRG2DP,G6PC2,GABRE,GALNT5,GDI2P1,GGT8P,GLI1,GPR1,GPR157,GPR52,HCCA…	R-HSA-500792	GPCR ligand binding	1.43127e-07
LGG	ACBD3-AS1,ACOT11,ADRA2B,ALKAL1,ANKRD66,AQP7P1,ASB12,BCRP9,BUB1B,C11orf88,C11orf97,C20orf85,C7orf65,C8orf34,C8orf34-AS1,CA3,CACNA1H,CAPSL,CCDC140,CCDC144NL,CCL18,CCL3L1,CCL3L3,CCL4L2,CCT2,CD207,CFAP299,CFAP45,CFAP57,CHRNB3,COL1A2,COL21A1,CRH,CXCL10,CXCL11,CXCL8,DAW1,DISC1FP1,DNMT3L,DUOX1,ECRG4,EN2,FAM153CP,FAM160A1-DT,FAM216B,FNDC1,FRG2DP,G6PC2,GABRE,GALNT5,GDI2P1,GGT8P,GLI1,GPR1,GPR157,GPR52,HCCA…	R-HSA-372790	Signaling by GPCR	3.67262e-05
LGG	ACBD3-AS1,ACOT11,ADRA2B,ALKAL1,ANKRD66,AQP7P1,ASB12,BCRP9,BUB1B,C11orf88,C11orf97,C20orf85,C7orf65,C8orf34,C8orf34-AS1,CA3,CACNA1H,CAPSL,CCDC140,CCDC144NL,CCL18,CCL3L1,CCL3L3,CCL4L2,CCT2,CD207,CFAP299,CFAP45,CFAP57,CHRNB3,COL1A2,COL21A1,CRH,CXCL10,CXCL11,CXCL8,DAW1,DISC1FP1,DNMT3L,DUOX1,ECRG4,EN2,FAM153CP,FAM160A1-DT,FAM216B,FNDC1,FRG2DP,G6PC2,GABRE,GALNT5,GDI2P1,GGT8P,GLI1,GPR1,GPR157,GPR52,HCCA…	R-HSA-388396	GPCR downstream signalling	0.000167147
LGG	ACBD3-AS1,ACOT11,ADRA2B,ALKAL1,ANKRD66,AQP7P1,ASB12,BCRP9,BUB1B,C11orf88,C11orf97,C20orf85,C7orf65,C8orf34,C8orf34-AS1,CA3,CACNA1H,CAPSL,CCDC140,CCDC144NL,CCL18,CCL3L1,CCL3L3,CCL4L2,CCT2,CD207,CFAP299,CFAP45,CFAP57,CHRNB3,COL1A2,COL21A1,CRH,CXCL10,CXCL11,CXCL8,DAW1,DISC1FP1,DNMT3L,DUOX1,ECRG4,EN2,FAM153CP,FAM160A1-DT,FAM216B,FNDC1,FRG2DP,G6PC2,GABRE,GALNT5,GDI2P1,GGT8P,GLI1,GPR1,GPR157,GPR52,HCCA…	R-HSA-418594	G alpha (i) signalling events	0.000233971
LGG	ACBD3-AS1,ACOT11,ADRA2B,ALKAL1,ANKRD66,AQP7P1,ASB12,BCRP9,BUB1B,C11orf88,C11orf97,C20orf85,C7orf65,C8orf34,C8orf34-AS1,CA3,CACNA1H,CAPSL,CCDC140,CCDC144NL,CCL18,CCL3L1,CCL3L3,CCL4L2,CCT2,CD207,CFAP299,CFAP45,CFAP57,CHRNB3,COL1A2,COL21A1,CRH,CXCL10,CXCL11,CXCL8,DAW1,DISC1FP1,DNMT3L,DUOX1,ECRG4,EN2,FAM153CP,FAM160A1-DT,FAM216B,FNDC1,FRG2DP,G6PC2,GABRE,GALNT5,GDI2P1,GGT8P,GLI1,GPR1,GPR157,GPR52,HCCA…	R-HSA-5619507	Activation of HOX genes during differentiation	0.000422774
LGG	ACBD3-AS1,ACOT11,ADRA2B,ALKAL1,ANKRD66,AQP7P1,ASB12,BCRP9,BUB1B,C11orf88,C11orf97,C20orf85,C7orf65,C8orf34,C8orf34-AS1,CA3,CACNA1H,CAPSL,CCDC140,CCDC144NL,CCL18,CCL3L1,CCL3L3,CCL4L2,CCT2,CD207,CFAP299,CFAP45,CFAP57,CHRNB3,COL1A2,COL21A1,CRH,CXCL10,CXCL11,CXCL8,DAW1,DISC1FP1,DNMT3L,DUOX1,ECRG4,EN2,FAM153CP,FAM160A1-DT,FAM216B,FNDC1,FRG2DP,G6PC2,GABRE,GALNT5,GDI2P1,GGT8P,GLI1,GPR1,GPR157,GPR52,HCCA…	R-HSA-5617472	Activation of anterior HOX genes in hindbrain development during early embryogenesis	0.000422774
LGG	ACBD3-AS1,ACOT11,ADRA2B,ALKAL1,ANKRD66,AQP7P1,ASB12,BCRP9,BUB1B,C11orf88,C11orf97,C20orf85,C7orf65,C8orf34,C8orf34-AS1,CA3,CACNA1H,CAPSL,CCDC140,CCDC144NL,CCL18,CCL3L1,CCL3L3,CCL4L2,CCT2,CD207,CFAP299,CFAP45,CFAP57,CHRNB3,COL1A2,COL21A1,CRH,CXCL10,CXCL11,CXCL8,DAW1,DISC1FP1,DNMT3L,DUOX1,ECRG4,EN2,FAM153CP,FAM160A1-DT,FAM216B,FNDC1,FRG2DP,G6PC2,GABRE,GALNT5,GDI2P1,GGT8P,GLI1,GPR1,GPR157,GPR52,HCCA…	R-HSA-1266738	Developmental Biology	0.000639589
LGG	ACBD3-AS1,ACOT11,ADRA2B,ALKAL1,ANKRD66,AQP7P1,ASB12,BCRP9,BUB1B,C11orf88,C11orf97,C20orf85,C7orf65,C8orf34,C8orf34-AS1,CA3,CACNA1H,CAPSL,CCDC140,CCDC144NL,CCL18,CCL3L1,CCL3L3,CCL4L2,CCT2,CD207,CFAP299,CFAP45,CFAP57,CHRNB3,COL1A2,COL21A1,CRH,CXCL10,CXCL11,CXCL8,DAW1,DISC1FP1,DNMT3L,DUOX1,ECRG4,EN2,FAM153CP,FAM160A1-DT,FAM216B,FNDC1,FRG2DP,G6PC2,GABRE,GALNT5,GDI2P1,GGT8P,GLI1,GPR1,GPR157,GPR52,HCCA…	R-HSA-162582	Signal Transduction	0.000691558
LGG	ACBD3-AS1,ACOT11,ADRA2B,ALKAL1,ANKRD66,AQP7P1,ASB12,BCRP9,BUB1B,C11orf88,C11orf97,C20orf85,C7orf65,C8orf34,C8orf34-AS1,CA3,CACNA1H,CAPSL,CCDC140,CCDC144NL,CCL18,CCL3L1,CCL3L3,CCL4L2,CCT2,CD207,CFAP299,CFAP45,CFAP57,CHRNB3,COL1A2,COL21A1,CRH,CXCL10,CXCL11,CXCL8,DAW1,DISC1FP1,DNMT3L,DUOX1,ECRG4,EN2,FAM153CP,FAM160A1-DT,FAM216B,FNDC1,FRG2DP,G6PC2,GABRE,GALNT5,GDI2P1,GGT8P,GLI1,GPR1,GPR157,GPR52,HCCA…	R-HSA-380108	Chemokine receptors bind chemokines	0.0028097
LIHC	ABCB5,AFP,AHSP,AK4P2,AK5,AKAP14,ANKRD18DP,ANKRD36BP2,ANO3,ANXA13,ANXA3,ARAP1-AS1,ARSF,ARSI,ASB9P1,B4GALNT4,BCYRN1,BICDL2,BOLL,BPIFB2,BRAFP1,C12orf75,C15orf56,C6orf132,CAPN13,CASC20,CAVIN4,CCDC144NL-AS1,CCDC196,CDCA7,CDH9,CELF4,CERS1,CLIC3,COPDA1,CPHL1P,CR1L,CREB3L1,CST2,CST6,CXCL11,CXCL17,DDR1,DDX4,DGCR5,DMKN,DOK7,DPP10-AS1,DPY19L2P1,DQX1,EGFR-AS1,EN2,EPCAM,ERVH-1,ESRP1,FAM166C,FAM167A,FBXO36P1,F…	R-HSA-162582	Signal Transduction	0.00281684
LIHC	ABCB5,AFP,AHSP,AK4P2,AK5,AKAP14,ANKRD18DP,ANKRD36BP2,ANO3,ANXA13,ANXA3,ARAP1-AS1,ARSF,ARSI,ASB9P1,B4GALNT4,BCYRN1,BICDL2,BOLL,BPIFB2,BRAFP1,C12orf75,C15orf56,C6orf132,CAPN13,CASC20,CAVIN4,CCDC144NL-AS1,CCDC196,CDCA7,CDH9,CELF4,CERS1,CLIC3,COPDA1,CPHL1P,CR1L,CREB3L1,CST2,CST6,CXCL11,CXCL17,DDR1,DDX4,DGCR5,DMKN,DOK7,DPP10-AS1,DPY19L2P1,DQX1,EGFR-AS1,EN2,EPCAM,ERVH-1,ESRP1,FAM166C,FAM167A,FBXO36P1,F…	R-HSA-112314	Neurotransmitter receptors and postsynaptic signal transmission	0.00568137
LIHC	ABCB5,AFP,AHSP,AK4P2,AK5,AKAP14,ANKRD18DP,ANKRD36BP2,ANO3,ANXA13,ANXA3,ARAP1-AS1,ARSF,ARSI,ASB9P1,B4GALNT4,BCYRN1,BICDL2,BOLL,BPIFB2,BRAFP1,C12orf75,C15orf56,C6orf132,CAPN13,CASC20,CAVIN4,CCDC144NL-AS1,CCDC196,CDCA7,CDH9,CELF4,CERS1,CLIC3,COPDA1,CPHL1P,CR1L,CREB3L1,CST2,CST6,CXCL11,CXCL17,DDR1,DDX4,DGCR5,DMKN,DOK7,DPP10-AS1,DPY19L2P1,DQX1,EGFR-AS1,EN2,EPCAM,ERVH-1,ESRP1,FAM166C,FAM167A,FBXO36P1,F…	R-HSA-375276	Peptide ligand-binding receptors	0.00814279
LIHC	ABCB5,AFP,AHSP,AK4P2,AK5,AKAP14,ANKRD18DP,ANKRD36BP2,ANO3,ANXA13,ANXA3,ARAP1-AS1,ARSF,ARSI,ASB9P1,B4GALNT4,BCYRN1,BICDL2,BOLL,BPIFB2,BRAFP1,C12orf75,C15orf56,C6orf132,CAPN13,CASC20,CAVIN4,CCDC144NL-AS1,CCDC196,CDCA7,CDH9,CELF4,CERS1,CLIC3,COPDA1,CPHL1P,CR1L,CREB3L1,CST2,CST6,CXCL11,CXCL17,DDR1,DDX4,DGCR5,DMKN,DOK7,DPP10-AS1,DPY19L2P1,DQX1,EGFR-AS1,EN2,EPCAM,ERVH-1,ESRP1,FAM166C,FAM167A,FBXO36P1,F…	R-HSA-500792	GPCR ligand binding	0.0133774
LIHC	ABCB5,AFP,AHSP,AK4P2,AK5,AKAP14,ANKRD18DP,ANKRD36BP2,ANO3,ANXA13,ANXA3,ARAP1-AS1,ARSF,ARSI,ASB9P1,B4GALNT4,BCYRN1,BICDL2,BOLL,BPIFB2,BRAFP1,C12orf75,C15orf56,C6orf132,CAPN13,CASC20,CAVIN4,CCDC144NL-AS1,CCDC196,CDCA7,CDH9,CELF4,CERS1,CLIC3,COPDA1,CPHL1P,CR1L,CREB3L1,CST2,CST6,CXCL11,CXCL17,DDR1,DDX4,DGCR5,DMKN,DOK7,DPP10-AS1,DPY19L2P1,DQX1,EGFR-AS1,EN2,EPCAM,ERVH-1,ESRP1,FAM166C,FAM167A,FBXO36P1,F…	R-HSA-112315	Transmission across Chemical Synapses	0.0321355
LIHC	ABCB5,AFP,AHSP,AK4P2,AK5,AKAP14,ANKRD18DP,ANKRD36BP2,ANO3,ANXA13,ANXA3,ARAP1-AS1,ARSF,ARSI,ASB9P1,B4GALNT4,BCYRN1,BICDL2,BOLL,BPIFB2,BRAFP1,C12orf75,C15orf56,C6orf132,CAPN13,CASC20,CAVIN4,CCDC144NL-AS1,CCDC196,CDCA7,CDH9,CELF4,CERS1,CLIC3,COPDA1,CPHL1P,CR1L,CREB3L1,CST2,CST6,CXCL11,CXCL17,DDR1,DDX4,DGCR5,DMKN,DOK7,DPP10-AS1,DPY19L2P1,DQX1,EGFR-AS1,EN2,EPCAM,ERVH-1,ESRP1,FAM166C,FAM167A,FBXO36P1,F…	R-HSA-112316	Neuronal System	0.0408782
LUAD	ABCA17P,ACSM6,ACTG1P13,ADAD1P2,ADAMTS19-AS1,AK3P5,ANKRD20A11P,ANKRD33B-AS1,ANKRD36P1,ANXA8,ARHGAP29-AS1,ARL14,ASB11,ATP5MDP1,B3GALT5,BASP1P1,BCAR4,BHMG1,BMP2KL,BNIP3P18,BNIP3P38,C10orf90,C10orf99,C11orf86,C12orf40,C20orf141,C21orf91-OT1,C5orf66-AS2,C8orf74,CALB2,CALCA,CASC18,CAV3,CCDC196,CD200R1L,CD200R1L-AS1,CDC20B,CDR1,CDSN,CEACAMP6,CELP,CHEK2P2,CIDEC,CLGN,CLLU1OS,CLRN1,CLRN3,CLYBL-AS1,COL5A1-A…	R-HSA-3214815	HDACs deacetylate histones	6.9536e-20
LUAD	ABCA17P,ACSM6,ACTG1P13,ADAD1P2,ADAMTS19-AS1,AK3P5,ANKRD20A11P,ANKRD33B-AS1,ANKRD36P1,ANXA8,ARHGAP29-AS1,ARL14,ASB11,ATP5MDP1,B3GALT5,BASP1P1,BCAR4,BHMG1,BMP2KL,BNIP3P18,BNIP3P38,C10orf90,C10orf99,C11orf86,C12orf40,C20orf141,C21orf91-OT1,C5orf66-AS2,C8orf74,CALB2,CALCA,CASC18,CAV3,CCDC196,CD200R1L,CD200R1L-AS1,CDC20B,CDR1,CDSN,CEACAMP6,CELP,CHEK2P2,CIDEC,CLGN,CLLU1OS,CLRN1,CLRN3,CLYBL-AS1,COL5A1-A…	R-HSA-2559586	DNA Damage/Telomere Stress Induced Senescence	5.44961e-18
LUAD	ABCA17P,ACSM6,ACTG1P13,ADAD1P2,ADAMTS19-AS1,AK3P5,ANKRD20A11P,ANKRD33B-AS1,ANKRD36P1,ANXA8,ARHGAP29-AS1,ARL14,ASB11,ATP5MDP1,B3GALT5,BASP1P1,BCAR4,BHMG1,BMP2KL,BNIP3P18,BNIP3P38,C10orf90,C10orf99,C11orf86,C12orf40,C20orf141,C21orf91-OT1,C5orf66-AS2,C8orf74,CALB2,CALCA,CASC18,CAV3,CCDC196,CD200R1L,CD200R1L-AS1,CDC20B,CDR1,CDSN,CEACAMP6,CELP,CHEK2P2,CIDEC,CLGN,CLLU1OS,CLRN1,CLRN3,CLYBL-AS1,COL5A1-A…	R-HSA-73728	RNA Polymerase I Promoter Opening	3.78461e-17
LUAD	ABCA17P,ACSM6,ACTG1P13,ADAD1P2,ADAMTS19-AS1,AK3P5,ANKRD20A11P,ANKRD33B-AS1,ANKRD36P1,ANXA8,ARHGAP29-AS1,ARL14,ASB11,ATP5MDP1,B3GALT5,BASP1P1,BCAR4,BHMG1,BMP2KL,BNIP3P18,BNIP3P38,C10orf90,C10orf99,C11orf86,C12orf40,C20orf141,C21orf91-OT1,C5orf66-AS2,C8orf74,CALB2,CALCA,CASC18,CAV3,CCDC196,CD200R1L,CD200R1L-AS1,CDC20B,CDR1,CDSN,CEACAMP6,CELP,CHEK2P2,CIDEC,CLGN,CLLU1OS,CLRN1,CLRN3,CLYBL-AS1,COL5A1-A…	R-HSA-5334118	DNA methylation	9.98626e-17
LUAD	ABCA17P,ACSM6,ACTG1P13,ADAD1P2,ADAMTS19-AS1,AK3P5,ANKRD20A11P,ANKRD33B-AS1,ANKRD36P1,ANXA8,ARHGAP29-AS1,ARL14,ASB11,ATP5MDP1,B3GALT5,BASP1P1,BCAR4,BHMG1,BMP2KL,BNIP3P18,BNIP3P38,C10orf90,C10orf99,C11orf86,C12orf40,C20orf141,C21orf91-OT1,C5orf66-AS2,C8orf74,CALB2,CALCA,CASC18,CAV3,CCDC196,CD200R1L,CD200R1L-AS1,CDC20B,CDR1,CDSN,CEACAMP6,CELP,CHEK2P2,CIDEC,CLGN,CLLU1OS,CLRN1,CLRN3,CLYBL-AS1,COL5A1-A…	R-HSA-5625886	Activated PKN1 stimulates transcription of AR (androgen receptor) regulated genes KLK2 and KLK3	2.45619e-16
LUAD	ABCA17P,ACSM6,ACTG1P13,ADAD1P2,ADAMTS19-AS1,AK3P5,ANKRD20A11P,ANKRD33B-AS1,ANKRD36P1,ANXA8,ARHGAP29-AS1,ARL14,ASB11,ATP5MDP1,B3GALT5,BASP1P1,BCAR4,BHMG1,BMP2KL,BNIP3P18,BNIP3P38,C10orf90,C10orf99,C11orf86,C12orf40,C20orf141,C21orf91-OT1,C5orf66-AS2,C8orf74,CALB2,CALCA,CASC18,CAV3,CCDC196,CD200R1L,CD200R1L-AS1,CDC20B,CDR1,CDSN,CEACAMP6,CELP,CHEK2P2,CIDEC,CLGN,CLLU1OS,CLRN1,CLRN3,CLYBL-AS1,COL5A1-A…	R-HSA-427359	SIRT1 negatively regulates rRNA expression	1.24784e-15
LUAD	ABCA17P,ACSM6,ACTG1P13,ADAD1P2,ADAMTS19-AS1,AK3P5,ANKRD20A11P,ANKRD33B-AS1,ANKRD36P1,ANXA8,ARHGAP29-AS1,ARL14,ASB11,ATP5MDP1,B3GALT5,BASP1P1,BCAR4,BHMG1,BMP2KL,BNIP3P18,BNIP3P38,C10orf90,C10orf99,C11orf86,C12orf40,C20orf141,C21orf91-OT1,C5orf66-AS2,C8orf74,CALB2,CALCA,CASC18,CAV3,CCDC196,CD200R1L,CD200R1L-AS1,CDC20B,CDR1,CDSN,CEACAMP6,CELP,CHEK2P2,CIDEC,CLGN,CLLU1OS,CLRN1,CLRN3,CLYBL-AS1,COL5A1-A…	R-HSA-212300	PRC2 methylates histones and DNA	2.61382e-15
LUAD	ABCA17P,ACSM6,ACTG1P13,ADAD1P2,ADAMTS19-AS1,AK3P5,ANKRD20A11P,ANKRD33B-AS1,ANKRD36P1,ANXA8,ARHGAP29-AS1,ARL14,ASB11,ATP5MDP1,B3GALT5,BASP1P1,BCAR4,BHMG1,BMP2KL,BNIP3P18,BNIP3P38,C10orf90,C10orf99,C11orf86,C12orf40,C20orf141,C21orf91-OT1,C5orf66-AS2,C8orf74,CALB2,CALCA,CASC18,CAV3,CCDC196,CD200R1L,CD200R1L-AS1,CDC20B,CDR1,CDSN,CEACAMP6,CELP,CHEK2P2,CIDEC,CLGN,CLLU1OS,CLRN1,CLRN3,CLYBL-AS1,COL5A1-A…	R-HSA-3214847	HATs acetylate histones	3.66568e-15
LUAD	ABCA17P,ACSM6,ACTG1P13,ADAD1P2,ADAMTS19-AS1,AK3P5,ANKRD20A11P,ANKRD33B-AS1,ANKRD36P1,ANXA8,ARHGAP29-AS1,ARL14,ASB11,ATP5MDP1,B3GALT5,BASP1P1,BCAR4,BHMG1,BMP2KL,BNIP3P18,BNIP3P38,C10orf90,C10orf99,C11orf86,C12orf40,C20orf141,C21orf91-OT1,C5orf66-AS2,C8orf74,CALB2,CALCA,CASC18,CAV3,CCDC196,CD200R1L,CD200R1L-AS1,CDC20B,CDR1,CDSN,CEACAMP6,CELP,CHEK2P2,CIDEC,CLGN,CLLU1OS,CLRN1,CLRN3,CLYBL-AS1,COL5A1-A…	R-HSA-2299718	Condensation of Prophase Chromosomes	3.72343e-15
LUAD	ABCA17P,ACSM6,ACTG1P13,ADAD1P2,ADAMTS19-AS1,AK3P5,ANKRD20A11P,ANKRD33B-AS1,ANKRD36P1,ANXA8,ARHGAP29-AS1,ARL14,ASB11,ATP5MDP1,B3GALT5,BASP1P1,BCAR4,BHMG1,BMP2KL,BNIP3P18,BNIP3P38,C10orf90,C10orf99,C11orf86,C12orf40,C20orf141,C21orf91-OT1,C5orf66-AS2,C8orf74,CALB2,CALCA,CASC18,CAV3,CCDC196,CD200R1L,CD200R1L-AS1,CDC20B,CDR1,CDSN,CEACAMP6,CELP,CHEK2P2,CIDEC,CLGN,CLLU1OS,CLRN1,CLRN3,CLYBL-AS1,COL5A1-A…	R-HSA-171306	Packaging Of Telomere Ends	5.75409e-15
LUAD	ABCA17P,ACSM6,ACTG1P13,ADAD1P2,ADAMTS19-AS1,AK3P5,ANKRD20A11P,ANKRD33B-AS1,ANKRD36P1,ANXA8,ARHGAP29-AS1,ARL14,ASB11,ATP5MDP1,B3GALT5,BASP1P1,BCAR4,BHMG1,BMP2KL,BNIP3P18,BNIP3P38,C10orf90,C10orf99,C11orf86,C12orf40,C20orf141,C21orf91-OT1,C5orf66-AS2,C8orf74,CALB2,CALCA,CASC18,CAV3,CCDC196,CD200R1L,CD200R1L-AS1,CDC20B,CDR1,CDSN,CEACAMP6,CELP,CHEK2P2,CIDEC,CLGN,CLLU1OS,CLRN1,CLRN3,CLYBL-AS1,COL5A1-A…	R-HSA-427389	ERCC6 (CSB) and EHMT2 (G9a) positively regulate rRNA expression	1.01695e-14
LUAD	ABCA17P,ACSM6,ACTG1P13,ADAD1P2,ADAMTS19-AS1,AK3P5,ANKRD20A11P,ANKRD33B-AS1,ANKRD36P1,ANXA8,ARHGAP29-AS1,ARL14,ASB11,ATP5MDP1,B3GALT5,BASP1P1,BCAR4,BHMG1,BMP2KL,BNIP3P18,BNIP3P38,C10orf90,C10orf99,C11orf86,C12orf40,C20orf141,C21orf91-OT1,C5orf66-AS2,C8orf74,CALB2,CALCA,CASC18,CAV3,CCDC196,CD200R1L,CD200R1L-AS1,CDC20B,CDR1,CDSN,CEACAMP6,CELP,CHEK2P2,CIDEC,CLGN,CLLU1OS,CLRN1,CLRN3,CLYBL-AS1,COL5A1-A…	R-HSA-201722	Formation of the beta-catenin:TCF transactivating complex	1.36673e-14
LUAD	ABCA17P,ACSM6,ACTG1P13,ADAD1P2,ADAMTS19-AS1,AK3P5,ANKRD20A11P,ANKRD33B-AS1,ANKRD36P1,ANXA8,ARHGAP29-AS1,ARL14,ASB11,ATP5MDP1,B3GALT5,BASP1P1,BCAR4,BHMG1,BMP2KL,BNIP3P18,BNIP3P38,C10orf90,C10orf99,C11orf86,C12orf40,C20orf141,C21orf91-OT1,C5orf66-AS2,C8orf74,CALB2,CALCA,CASC18,CAV3,CCDC196,CD200R1L,CD200R1L-AS1,CDC20B,CDR1,CDSN,CEACAMP6,CELP,CHEK2P2,CIDEC,CLGN,CLLU1OS,CLRN1,CLRN3,CLYBL-AS1,COL5A1-A…	R-HSA-110331	Cleavage of the damaged purine	2.93125e-14
LUAD	ABCA17P,ACSM6,ACTG1P13,ADAD1P2,ADAMTS19-AS1,AK3P5,ANKRD20A11P,ANKRD33B-AS1,ANKRD36P1,ANXA8,ARHGAP29-AS1,ARL14,ASB11,ATP5MDP1,B3GALT5,BASP1P1,BCAR4,BHMG1,BMP2KL,BNIP3P18,BNIP3P38,C10orf90,C10orf99,C11orf86,C12orf40,C20orf141,C21orf91-OT1,C5orf66-AS2,C8orf74,CALB2,CALCA,CASC18,CAV3,CCDC196,CD200R1L,CD200R1L-AS1,CDC20B,CDR1,CDSN,CEACAMP6,CELP,CHEK2P2,CIDEC,CLGN,CLLU1OS,CLRN1,CLRN3,CLYBL-AS1,COL5A1-A…	R-HSA-73927	Depurination	2.93125e-14
LUAD	ABCA17P,ACSM6,ACTG1P13,ADAD1P2,ADAMTS19-AS1,AK3P5,ANKRD20A11P,ANKRD33B-AS1,ANKRD36P1,ANXA8,ARHGAP29-AS1,ARL14,ASB11,ATP5MDP1,B3GALT5,BASP1P1,BCAR4,BHMG1,BMP2KL,BNIP3P18,BNIP3P38,C10orf90,C10orf99,C11orf86,C12orf40,C20orf141,C21orf91-OT1,C5orf66-AS2,C8orf74,CALB2,CALCA,CASC18,CAV3,CCDC196,CD200R1L,CD200R1L-AS1,CDC20B,CDR1,CDSN,CEACAMP6,CELP,CHEK2P2,CIDEC,CLGN,CLLU1OS,CLRN1,CLRN3,CLYBL-AS1,COL5A1-A…	R-HSA-110330	Recognition and association of DNA glycosylase with site containing an affected purine	2.93125e-14
LUAD	ABCA17P,ACSM6,ACTG1P13,ADAD1P2,ADAMTS19-AS1,AK3P5,ANKRD20A11P,ANKRD33B-AS1,ANKRD36P1,ANXA8,ARHGAP29-AS1,ARL14,ASB11,ATP5MDP1,B3GALT5,BASP1P1,BCAR4,BHMG1,BMP2KL,BNIP3P18,BNIP3P38,C10orf90,C10orf99,C11orf86,C12orf40,C20orf141,C21orf91-OT1,C5orf66-AS2,C8orf74,CALB2,CALCA,CASC18,CAV3,CCDC196,CD200R1L,CD200R1L-AS1,CDC20B,CDR1,CDSN,CEACAMP6,CELP,CHEK2P2,CIDEC,CLGN,CLLU1OS,CLRN1,CLRN3,CLYBL-AS1,COL5A1-A…	R-HSA-110329	Cleavage of the damaged pyrimidine	1.69684e-13
LUAD	ABCA17P,ACSM6,ACTG1P13,ADAD1P2,ADAMTS19-AS1,AK3P5,ANKRD20A11P,ANKRD33B-AS1,ANKRD36P1,ANXA8,ARHGAP29-AS1,ARL14,ASB11,ATP5MDP1,B3GALT5,BASP1P1,BCAR4,BHMG1,BMP2KL,BNIP3P18,BNIP3P38,C10orf90,C10orf99,C11orf86,C12orf40,C20orf141,C21orf91-OT1,C5orf66-AS2,C8orf74,CALB2,CALCA,CASC18,CAV3,CCDC196,CD200R1L,CD200R1L-AS1,CDC20B,CDR1,CDSN,CEACAMP6,CELP,CHEK2P2,CIDEC,CLGN,CLLU1OS,CLRN1,CLRN3,CLYBL-AS1,COL5A1-A…	R-HSA-73928	Depyrimidination	1.69684e-13
LUAD	ABCA17P,ACSM6,ACTG1P13,ADAD1P2,ADAMTS19-AS1,AK3P5,ANKRD20A11P,ANKRD33B-AS1,ANKRD36P1,ANXA8,ARHGAP29-AS1,ARL14,ASB11,ATP5MDP1,B3GALT5,BASP1P1,BCAR4,BHMG1,BMP2KL,BNIP3P18,BNIP3P38,C10orf90,C10orf99,C11orf86,C12orf40,C20orf141,C21orf91-OT1,C5orf66-AS2,C8orf74,CALB2,CALCA,CASC18,CAV3,CCDC196,CD200R1L,CD200R1L-AS1,CDC20B,CDR1,CDSN,CEACAMP6,CELP,CHEK2P2,CIDEC,CLGN,CLLU1OS,CLRN1,CLRN3,CLYBL-AS1,COL5A1-A…	R-HSA-110328	Recognition and association of DNA glycosylase with site containing an affected pyrimidine	1.69684e-13
LUAD	ABCA17P,ACSM6,ACTG1P13,ADAD1P2,ADAMTS19-AS1,AK3P5,ANKRD20A11P,ANKRD33B-AS1,ANKRD36P1,ANXA8,ARHGAP29-AS1,ARL14,ASB11,ATP5MDP1,B3GALT5,BASP1P1,BCAR4,BHMG1,BMP2KL,BNIP3P18,BNIP3P38,C10orf90,C10orf99,C11orf86,C12orf40,C20orf141,C21orf91-OT1,C5orf66-AS2,C8orf74,CALB2,CALCA,CASC18,CAV3,CCDC196,CD200R1L,CD200R1L-AS1,CDC20B,CDR1,CDSN,CEACAMP6,CELP,CHEK2P2,CIDEC,CLGN,CLLU1OS,CLRN1,CLRN3,CLYBL-AS1,COL5A1-A…	R-HSA-912446	Meiotic recombination	1.77557e-13
LUAD	ABCA17P,ACSM6,ACTG1P13,ADAD1P2,ADAMTS19-AS1,AK3P5,ANKRD20A11P,ANKRD33B-AS1,ANKRD36P1,ANXA8,ARHGAP29-AS1,ARL14,ASB11,ATP5MDP1,B3GALT5,BASP1P1,BCAR4,BHMG1,BMP2KL,BNIP3P18,BNIP3P38,C10orf90,C10orf99,C11orf86,C12orf40,C20orf141,C21orf91-OT1,C5orf66-AS2,C8orf74,CALB2,CALCA,CASC18,CAV3,CCDC196,CD200R1L,CD200R1L-AS1,CDC20B,CDR1,CDSN,CEACAMP6,CELP,CHEK2P2,CIDEC,CLGN,CLLU1OS,CLRN1,CLRN3,CLYBL-AS1,COL5A1-A…	R-HSA-73929	Base-Excision Repair, AP Site Formation	3.1968e-13
LUAD	ABCA17P,ACSM6,ACTG1P13,ADAD1P2,ADAMTS19-AS1,AK3P5,ANKRD20A11P,ANKRD33B-AS1,ANKRD36P1,ANXA8,ARHGAP29-AS1,ARL14,ASB11,ATP5MDP1,B3GALT5,BASP1P1,BCAR4,BHMG1,BMP2KL,BNIP3P18,BNIP3P38,C10orf90,C10orf99,C11orf86,C12orf40,C20orf141,C21orf91-OT1,C5orf66-AS2,C8orf74,CALB2,CALCA,CASC18,CAV3,CCDC196,CD200R1L,CD200R1L-AS1,CDC20B,CDR1,CDSN,CEACAMP6,CELP,CHEK2P2,CIDEC,CLGN,CLLU1OS,CLRN1,CLRN3,CLYBL-AS1,COL5A1-A…	R-HSA-9616222	Transcriptional regulation of granulopoiesis	3.73278e-13
LUAD	ABCA17P,ACSM6,ACTG1P13,ADAD1P2,ADAMTS19-AS1,AK3P5,ANKRD20A11P,ANKRD33B-AS1,ANKRD36P1,ANXA8,ARHGAP29-AS1,ARL14,ASB11,ATP5MDP1,B3GALT5,BASP1P1,BCAR4,BHMG1,BMP2KL,BNIP3P18,BNIP3P38,C10orf90,C10orf99,C11orf86,C12orf40,C20orf141,C21orf91-OT1,C5orf66-AS2,C8orf74,CALB2,CALCA,CASC18,CAV3,CCDC196,CD200R1L,CD200R1L-AS1,CDC20B,CDR1,CDSN,CEACAMP6,CELP,CHEK2P2,CIDEC,CLGN,CLLU1OS,CLRN1,CLRN3,CLYBL-AS1,COL5A1-A…	R-HSA-5250924	B-WICH complex positively regulates rRNA expression	4.73594e-13
LUAD	ABCA17P,ACSM6,ACTG1P13,ADAD1P2,ADAMTS19-AS1,AK3P5,ANKRD20A11P,ANKRD33B-AS1,ANKRD36P1,ANXA8,ARHGAP29-AS1,ARL14,ASB11,ATP5MDP1,B3GALT5,BASP1P1,BCAR4,BHMG1,BMP2KL,BNIP3P18,BNIP3P38,C10orf90,C10orf99,C11orf86,C12orf40,C20orf141,C21orf91-OT1,C5orf66-AS2,C8orf74,CALB2,CALCA,CASC18,CAV3,CCDC196,CD200R1L,CD200R1L-AS1,CDC20B,CDR1,CDSN,CEACAMP6,CELP,CHEK2P2,CIDEC,CLGN,CLLU1OS,CLRN1,CLRN3,CLYBL-AS1,COL5A1-A…	R-HSA-73772	RNA Polymerase I Promoter Escape	4.73594e-13
LUAD	ABCA17P,ACSM6,ACTG1P13,ADAD1P2,ADAMTS19-AS1,AK3P5,ANKRD20A11P,ANKRD33B-AS1,ANKRD36P1,ANXA8,ARHGAP29-AS1,ARL14,ASB11,ATP5MDP1,B3GALT5,BASP1P1,BCAR4,BHMG1,BMP2KL,BNIP3P18,BNIP3P38,C10orf90,C10orf99,C11orf86,C12orf40,C20orf141,C21orf91-OT1,C5orf66-AS2,C8orf74,CALB2,CALCA,CASC18,CAV3,CCDC196,CD200R1L,CD200R1L-AS1,CDC20B,CDR1,CDSN,CEACAMP6,CELP,CHEK2P2,CIDEC,CLGN,CLLU1OS,CLRN1,CLRN3,CLYBL-AS1,COL5A1-A…	R-HSA-977225	Amyloid fiber formation	6.75685e-13
LUAD	ABCA17P,ACSM6,ACTG1P13,ADAD1P2,ADAMTS19-AS1,AK3P5,ANKRD20A11P,ANKRD33B-AS1,ANKRD36P1,ANXA8,ARHGAP29-AS1,ARL14,ASB11,ATP5MDP1,B3GALT5,BASP1P1,BCAR4,BHMG1,BMP2KL,BNIP3P18,BNIP3P38,C10orf90,C10orf99,C11orf86,C12orf40,C20orf141,C21orf91-OT1,C5orf66-AS2,C8orf74,CALB2,CALCA,CASC18,CAV3,CCDC196,CD200R1L,CD200R1L-AS1,CDC20B,CDR1,CDSN,CEACAMP6,CELP,CHEK2P2,CIDEC,CLGN,CLLU1OS,CLRN1,CLRN3,CLYBL-AS1,COL5A1-A…	R-HSA-5625740	RHO GTPases activate PKNs	9.4194e-13
LUAD	ABCA17P,ACSM6,ACTG1P13,ADAD1P2,ADAMTS19-AS1,AK3P5,ANKRD20A11P,ANKRD33B-AS1,ANKRD36P1,ANXA8,ARHGAP29-AS1,ARL14,ASB11,ATP5MDP1,B3GALT5,BASP1P1,BCAR4,BHMG1,BMP2KL,BNIP3P18,BNIP3P38,C10orf90,C10orf99,C11orf86,C12orf40,C20orf141,C21orf91-OT1,C5orf66-AS2,C8orf74,CALB2,CALCA,CASC18,CAV3,CCDC196,CD200R1L,CD200R1L-AS1,CDC20B,CDR1,CDSN,CEACAMP6,CELP,CHEK2P2,CIDEC,CLGN,CLLU1OS,CLRN1,CLRN3,CLYBL-AS1,COL5A1-A…	R-HSA-157579	Telomere Maintenance	9.4194e-13
LUAD	ABCA17P,ACSM6,ACTG1P13,ADAD1P2,ADAMTS19-AS1,AK3P5,ANKRD20A11P,ANKRD33B-AS1,ANKRD36P1,ANXA8,ARHGAP29-AS1,ARL14,ASB11,ATP5MDP1,B3GALT5,BASP1P1,BCAR4,BHMG1,BMP2KL,BNIP3P18,BNIP3P38,C10orf90,C10orf99,C11orf86,C12orf40,C20orf141,C21orf91-OT1,C5orf66-AS2,C8orf74,CALB2,CALCA,CASC18,CAV3,CCDC196,CD200R1L,CD200R1L-AS1,CDC20B,CDR1,CDSN,CEACAMP6,CELP,CHEK2P2,CIDEC,CLGN,CLLU1OS,CLRN1,CLRN3,CLYBL-AS1,COL5A1-A…	R-HSA-8936459	RUNX1 regulates genes involved in megakaryocyte differentiation and platelet function	2.22729e-12
LUAD	ABCA17P,ACSM6,ACTG1P13,ADAD1P2,ADAMTS19-AS1,AK3P5,ANKRD20A11P,ANKRD33B-AS1,ANKRD36P1,ANXA8,ARHGAP29-AS1,ARL14,ASB11,ATP5MDP1,B3GALT5,BASP1P1,BCAR4,BHMG1,BMP2KL,BNIP3P18,BNIP3P38,C10orf90,C10orf99,C11orf86,C12orf40,C20orf141,C21orf91-OT1,C5orf66-AS2,C8orf74,CALB2,CALCA,CASC18,CAV3,CCDC196,CD200R1L,CD200R1L-AS1,CDC20B,CDR1,CDSN,CEACAMP6,CELP,CHEK2P2,CIDEC,CLGN,CLLU1OS,CLRN1,CLRN3,CLYBL-AS1,COL5A1-A…	R-HSA-606279	Deposition of new CENPA-containing nucleosomes at the centromere	4.8894e-12
LUAD	ABCA17P,ACSM6,ACTG1P13,ADAD1P2,ADAMTS19-AS1,AK3P5,ANKRD20A11P,ANKRD33B-AS1,ANKRD36P1,ANXA8,ARHGAP29-AS1,ARL14,ASB11,ATP5MDP1,B3GALT5,BASP1P1,BCAR4,BHMG1,BMP2KL,BNIP3P18,BNIP3P38,C10orf90,C10orf99,C11orf86,C12orf40,C20orf141,C21orf91-OT1,C5orf66-AS2,C8orf74,CALB2,CALCA,CASC18,CAV3,CCDC196,CD200R1L,CD200R1L-AS1,CDC20B,CDR1,CDSN,CEACAMP6,CELP,CHEK2P2,CIDEC,CLGN,CLLU1OS,CLRN1,CLRN3,CLYBL-AS1,COL5A1-A…	R-HSA-774815	Nucleosome assembly	4.8894e-12
LUAD	ABCA17P,ACSM6,ACTG1P13,ADAD1P2,ADAMTS19-AS1,AK3P5,ANKRD20A11P,ANKRD33B-AS1,ANKRD36P1,ANXA8,ARHGAP29-AS1,ARL14,ASB11,ATP5MDP1,B3GALT5,BASP1P1,BCAR4,BHMG1,BMP2KL,BNIP3P18,BNIP3P38,C10orf90,C10orf99,C11orf86,C12orf40,C20orf141,C21orf91-OT1,C5orf66-AS2,C8orf74,CALB2,CALCA,CASC18,CAV3,CCDC196,CD200R1L,CD200R1L-AS1,CDC20B,CDR1,CDSN,CEACAMP6,CELP,CHEK2P2,CIDEC,CLGN,CLLU1OS,CLRN1,CLRN3,CLYBL-AS1,COL5A1-A…	R-HSA-2559583	Cellular Senescence	6.15872e-12
LUAD	ABCA17P,ACSM6,ACTG1P13,ADAD1P2,ADAMTS19-AS1,AK3P5,ANKRD20A11P,ANKRD33B-AS1,ANKRD36P1,ANXA8,ARHGAP29-AS1,ARL14,ASB11,ATP5MDP1,B3GALT5,BASP1P1,BCAR4,BHMG1,BMP2KL,BNIP3P18,BNIP3P38,C10orf90,C10orf99,C11orf86,C12orf40,C20orf141,C21orf91-OT1,C5orf66-AS2,C8orf74,CALB2,CALCA,CASC18,CAV3,CCDC196,CD200R1L,CD200R1L-AS1,CDC20B,CDR1,CDSN,CEACAMP6,CELP,CHEK2P2,CIDEC,CLGN,CLLU1OS,CLRN1,CLRN3,CLYBL-AS1,COL5A1-A…	R-HSA-1912408	Pre-NOTCH Transcription and Translation	8.79915e-12
LUAD	ABCA17P,ACSM6,ACTG1P13,ADAD1P2,ADAMTS19-AS1,AK3P5,ANKRD20A11P,ANKRD33B-AS1,ANKRD36P1,ANXA8,ARHGAP29-AS1,ARL14,ASB11,ATP5MDP1,B3GALT5,BASP1P1,BCAR4,BHMG1,BMP2KL,BNIP3P18,BNIP3P38,C10orf90,C10orf99,C11orf86,C12orf40,C20orf141,C21orf91-OT1,C5orf66-AS2,C8orf74,CALB2,CALCA,CASC18,CAV3,CCDC196,CD200R1L,CD200R1L-AS1,CDC20B,CDR1,CDSN,CEACAMP6,CELP,CHEK2P2,CIDEC,CLGN,CLLU1OS,CLRN1,CLRN3,CLYBL-AS1,COL5A1-A…	R-HSA-5250913	Positive epigenetic regulation of rRNA expression	1.26831e-11
LUAD	ABCA17P,ACSM6,ACTG1P13,ADAD1P2,ADAMTS19-AS1,AK3P5,ANKRD20A11P,ANKRD33B-AS1,ANKRD36P1,ANXA8,ARHGAP29-AS1,ARL14,ASB11,ATP5MDP1,B3GALT5,BASP1P1,BCAR4,BHMG1,BMP2KL,BNIP3P18,BNIP3P38,C10orf90,C10orf99,C11orf86,C12orf40,C20orf141,C21orf91-OT1,C5orf66-AS2,C8orf74,CALB2,CALCA,CASC18,CAV3,CCDC196,CD200R1L,CD200R1L-AS1,CDC20B,CDR1,CDSN,CEACAMP6,CELP,CHEK2P2,CIDEC,CLGN,CLLU1OS,CLRN1,CLRN3,CLYBL-AS1,COL5A1-A…	R-HSA-5578749	Transcriptional regulation by small RNAs	1.26831e-11
LUAD	ABCA17P,ACSM6,ACTG1P13,ADAD1P2,ADAMTS19-AS1,AK3P5,ANKRD20A11P,ANKRD33B-AS1,ANKRD36P1,ANXA8,ARHGAP29-AS1,ARL14,ASB11,ATP5MDP1,B3GALT5,BASP1P1,BCAR4,BHMG1,BMP2KL,BNIP3P18,BNIP3P38,C10orf90,C10orf99,C11orf86,C12orf40,C20orf141,C21orf91-OT1,C5orf66-AS2,C8orf74,CALB2,CALCA,CASC18,CAV3,CCDC196,CD200R1L,CD200R1L-AS1,CDC20B,CDR1,CDSN,CEACAMP6,CELP,CHEK2P2,CIDEC,CLGN,CLLU1OS,CLRN1,CLRN3,CLYBL-AS1,COL5A1-A…	R-HSA-427413	NoRC negatively regulates rRNA expression	1.51656e-11
LUAD	ABCA17P,ACSM6,ACTG1P13,ADAD1P2,ADAMTS19-AS1,AK3P5,ANKRD20A11P,ANKRD33B-AS1,ANKRD36P1,ANXA8,ARHGAP29-AS1,ARL14,ASB11,ATP5MDP1,B3GALT5,BASP1P1,BCAR4,BHMG1,BMP2KL,BNIP3P18,BNIP3P38,C10orf90,C10orf99,C11orf86,C12orf40,C20orf141,C21orf91-OT1,C5orf66-AS2,C8orf74,CALB2,CALCA,CASC18,CAV3,CCDC196,CD200R1L,CD200R1L-AS1,CDC20B,CDR1,CDSN,CEACAMP6,CELP,CHEK2P2,CIDEC,CLGN,CLLU1OS,CLRN1,CLRN3,CLYBL-AS1,COL5A1-A…	R-HSA-1221632	Meiotic synapsis	1.92257e-11
LUAD	ABCA17P,ACSM6,ACTG1P13,ADAD1P2,ADAMTS19-AS1,AK3P5,ANKRD20A11P,ANKRD33B-AS1,ANKRD36P1,ANXA8,ARHGAP29-AS1,ARL14,ASB11,ATP5MDP1,B3GALT5,BASP1P1,BCAR4,BHMG1,BMP2KL,BNIP3P18,BNIP3P38,C10orf90,C10orf99,C11orf86,C12orf40,C20orf141,C21orf91-OT1,C5orf66-AS2,C8orf74,CALB2,CALCA,CASC18,CAV3,CCDC196,CD200R1L,CD200R1L-AS1,CDC20B,CDR1,CDSN,CEACAMP6,CELP,CHEK2P2,CIDEC,CLGN,CLLU1OS,CLRN1,CLRN3,CLYBL-AS1,COL5A1-A…	R-HSA-73854	RNA Polymerase I Promoter Clearance	2.55332e-11
LUAD	ABCA17P,ACSM6,ACTG1P13,ADAD1P2,ADAMTS19-AS1,AK3P5,ANKRD20A11P,ANKRD33B-AS1,ANKRD36P1,ANXA8,ARHGAP29-AS1,ARL14,ASB11,ATP5MDP1,B3GALT5,BASP1P1,BCAR4,BHMG1,BMP2KL,BNIP3P18,BNIP3P38,C10orf90,C10orf99,C11orf86,C12orf40,C20orf141,C21orf91-OT1,C5orf66-AS2,C8orf74,CALB2,CALCA,CASC18,CAV3,CCDC196,CD200R1L,CD200R1L-AS1,CDC20B,CDR1,CDSN,CEACAMP6,CELP,CHEK2P2,CIDEC,CLGN,CLLU1OS,CLRN1,CLRN3,CLYBL-AS1,COL5A1-A…	R-HSA-2559582	Senescence-Associated Secretory Phenotype (SASP)	2.55332e-11
LUAD	ABCA17P,ACSM6,ACTG1P13,ADAD1P2,ADAMTS19-AS1,AK3P5,ANKRD20A11P,ANKRD33B-AS1,ANKRD36P1,ANXA8,ARHGAP29-AS1,ARL14,ASB11,ATP5MDP1,B3GALT5,BASP1P1,BCAR4,BHMG1,BMP2KL,BNIP3P18,BNIP3P38,C10orf90,C10orf99,C11orf86,C12orf40,C20orf141,C21orf91-OT1,C5orf66-AS2,C8orf74,CALB2,CALCA,CASC18,CAV3,CCDC196,CD200R1L,CD200R1L-AS1,CDC20B,CDR1,CDSN,CEACAMP6,CELP,CHEK2P2,CIDEC,CLGN,CLLU1OS,CLRN1,CLRN3,CLYBL-AS1,COL5A1-A…	R-HSA-73864	RNA Polymerase I Transcription	3.57018e-11
LUAD	ABCA17P,ACSM6,ACTG1P13,ADAD1P2,ADAMTS19-AS1,AK3P5,ANKRD20A11P,ANKRD33B-AS1,ANKRD36P1,ANXA8,ARHGAP29-AS1,ARL14,ASB11,ATP5MDP1,B3GALT5,BASP1P1,BCAR4,BHMG1,BMP2KL,BNIP3P18,BNIP3P38,C10orf90,C10orf99,C11orf86,C12orf40,C20orf141,C21orf91-OT1,C5orf66-AS2,C8orf74,CALB2,CALCA,CASC18,CAV3,CCDC196,CD200R1L,CD200R1L-AS1,CDC20B,CDR1,CDSN,CEACAMP6,CELP,CHEK2P2,CIDEC,CLGN,CLLU1OS,CLRN1,CLRN3,CLYBL-AS1,COL5A1-A…	R-HSA-5250941	Negative epigenetic regulation of rRNA expression	4.20719e-11
LUAD	ABCA17P,ACSM6,ACTG1P13,ADAD1P2,ADAMTS19-AS1,AK3P5,ANKRD20A11P,ANKRD33B-AS1,ANKRD36P1,ANXA8,ARHGAP29-AS1,ARL14,ASB11,ATP5MDP1,B3GALT5,BASP1P1,BCAR4,BHMG1,BMP2KL,BNIP3P18,BNIP3P38,C10orf90,C10orf99,C11orf86,C12orf40,C20orf141,C21orf91-OT1,C5orf66-AS2,C8orf74,CALB2,CALCA,CASC18,CAV3,CCDC196,CD200R1L,CD200R1L-AS1,CDC20B,CDR1,CDSN,CEACAMP6,CELP,CHEK2P2,CIDEC,CLGN,CLLU1OS,CLRN1,CLRN3,CLYBL-AS1,COL5A1-A…	R-HSA-3214858	RMTs methylate histone arginines	6.41051e-11
LUAD	ABCA17P,ACSM6,ACTG1P13,ADAD1P2,ADAMTS19-AS1,AK3P5,ANKRD20A11P,ANKRD33B-AS1,ANKRD36P1,ANXA8,ARHGAP29-AS1,ARL14,ASB11,ATP5MDP1,B3GALT5,BASP1P1,BCAR4,BHMG1,BMP2KL,BNIP3P18,BNIP3P38,C10orf90,C10orf99,C11orf86,C12orf40,C20orf141,C21orf91-OT1,C5orf66-AS2,C8orf74,CALB2,CALCA,CASC18,CAV3,CCDC196,CD200R1L,CD200R1L-AS1,CDC20B,CDR1,CDSN,CEACAMP6,CELP,CHEK2P2,CIDEC,CLGN,CLLU1OS,CLRN1,CLRN3,CLYBL-AS1,COL5A1-A…	R-HSA-1500620	Meiosis	9.25968e-11
LUAD	ABCA17P,ACSM6,ACTG1P13,ADAD1P2,ADAMTS19-AS1,AK3P5,ANKRD20A11P,ANKRD33B-AS1,ANKRD36P1,ANXA8,ARHGAP29-AS1,ARL14,ASB11,ATP5MDP1,B3GALT5,BASP1P1,BCAR4,BHMG1,BMP2KL,BNIP3P18,BNIP3P38,C10orf90,C10orf99,C11orf86,C12orf40,C20orf141,C21orf91-OT1,C5orf66-AS2,C8orf74,CALB2,CALCA,CASC18,CAV3,CCDC196,CD200R1L,CD200R1L-AS1,CDC20B,CDR1,CDSN,CEACAMP6,CELP,CHEK2P2,CIDEC,CLGN,CLLU1OS,CLRN1,CLRN3,CLYBL-AS1,COL5A1-A…	R-HSA-73886	Chromosome Maintenance	1.2519e-10
LUAD	ABCA17P,ACSM6,ACTG1P13,ADAD1P2,ADAMTS19-AS1,AK3P5,ANKRD20A11P,ANKRD33B-AS1,ANKRD36P1,ANXA8,ARHGAP29-AS1,ARL14,ASB11,ATP5MDP1,B3GALT5,BASP1P1,BCAR4,BHMG1,BMP2KL,BNIP3P18,BNIP3P38,C10orf90,C10orf99,C11orf86,C12orf40,C20orf141,C21orf91-OT1,C5orf66-AS2,C8orf74,CALB2,CALCA,CASC18,CAV3,CCDC196,CD200R1L,CD200R1L-AS1,CDC20B,CDR1,CDSN,CEACAMP6,CELP,CHEK2P2,CIDEC,CLGN,CLLU1OS,CLRN1,CLRN3,CLYBL-AS1,COL5A1-A…	R-HSA-1912422	Pre-NOTCH Expression and Processing	1.2519e-10
LUAD	ABCA17P,ACSM6,ACTG1P13,ADAD1P2,ADAMTS19-AS1,AK3P5,ANKRD20A11P,ANKRD33B-AS1,ANKRD36P1,ANXA8,ARHGAP29-AS1,ARL14,ASB11,ATP5MDP1,B3GALT5,BASP1P1,BCAR4,BHMG1,BMP2KL,BNIP3P18,BNIP3P38,C10orf90,C10orf99,C11orf86,C12orf40,C20orf141,C21orf91-OT1,C5orf66-AS2,C8orf74,CALB2,CALCA,CASC18,CAV3,CCDC196,CD200R1L,CD200R1L-AS1,CDC20B,CDR1,CDSN,CEACAMP6,CELP,CHEK2P2,CIDEC,CLGN,CLLU1OS,CLRN1,CLRN3,CLYBL-AS1,COL5A1-A…	R-HSA-5619507	Activation of HOX genes during differentiation	1.45157e-10
LUAD	ABCA17P,ACSM6,ACTG1P13,ADAD1P2,ADAMTS19-AS1,AK3P5,ANKRD20A11P,ANKRD33B-AS1,ANKRD36P1,ANXA8,ARHGAP29-AS1,ARL14,ASB11,ATP5MDP1,B3GALT5,BASP1P1,BCAR4,BHMG1,BMP2KL,BNIP3P18,BNIP3P38,C10orf90,C10orf99,C11orf86,C12orf40,C20orf141,C21orf91-OT1,C5orf66-AS2,C8orf74,CALB2,CALCA,CASC18,CAV3,CCDC196,CD200R1L,CD200R1L-AS1,CDC20B,CDR1,CDSN,CEACAMP6,CELP,CHEK2P2,CIDEC,CLGN,CLLU1OS,CLRN1,CLRN3,CLYBL-AS1,COL5A1-A…	R-HSA-5617472	Activation of anterior HOX genes in hindbrain development during early embryogenesis	1.45157e-10
LUAD	ABCA17P,ACSM6,ACTG1P13,ADAD1P2,ADAMTS19-AS1,AK3P5,ANKRD20A11P,ANKRD33B-AS1,ANKRD36P1,ANXA8,ARHGAP29-AS1,ARL14,ASB11,ATP5MDP1,B3GALT5,BASP1P1,BCAR4,BHMG1,BMP2KL,BNIP3P18,BNIP3P38,C10orf90,C10orf99,C11orf86,C12orf40,C20orf141,C21orf91-OT1,C5orf66-AS2,C8orf74,CALB2,CALCA,CASC18,CAV3,CCDC196,CD200R1L,CD200R1L-AS1,CDC20B,CDR1,CDSN,CEACAMP6,CELP,CHEK2P2,CIDEC,CLGN,CLLU1OS,CLRN1,CLRN3,CLYBL-AS1,COL5A1-A…	R-HSA-73884	Base Excision Repair	1.96087e-10
LUAD	ABCA17P,ACSM6,ACTG1P13,ADAD1P2,ADAMTS19-AS1,AK3P5,ANKRD20A11P,ANKRD33B-AS1,ANKRD36P1,ANXA8,ARHGAP29-AS1,ARL14,ASB11,ATP5MDP1,B3GALT5,BASP1P1,BCAR4,BHMG1,BMP2KL,BNIP3P18,BNIP3P38,C10orf90,C10orf99,C11orf86,C12orf40,C20orf141,C21orf91-OT1,C5orf66-AS2,C8orf74,CALB2,CALCA,CASC18,CAV3,CCDC196,CD200R1L,CD200R1L-AS1,CDC20B,CDR1,CDSN,CEACAMP6,CELP,CHEK2P2,CIDEC,CLGN,CLLU1OS,CLRN1,CLRN3,CLYBL-AS1,COL5A1-A…	R-HSA-2559580	Oxidative Stress Induced Senescence	2.57773e-10
LUAD	ABCA17P,ACSM6,ACTG1P13,ADAD1P2,ADAMTS19-AS1,AK3P5,ANKRD20A11P,ANKRD33B-AS1,ANKRD36P1,ANXA8,ARHGAP29-AS1,ARL14,ASB11,ATP5MDP1,B3GALT5,BASP1P1,BCAR4,BHMG1,BMP2KL,BNIP3P18,BNIP3P38,C10orf90,C10orf99,C11orf86,C12orf40,C20orf141,C21orf91-OT1,C5orf66-AS2,C8orf74,CALB2,CALCA,CASC18,CAV3,CCDC196,CD200R1L,CD200R1L-AS1,CDC20B,CDR1,CDSN,CEACAMP6,CELP,CHEK2P2,CIDEC,CLGN,CLLU1OS,CLRN1,CLRN3,CLYBL-AS1,COL5A1-A…	R-HSA-9018519	Estrogen-dependent gene expression	3.55881e-10
LUAD	ABCA17P,ACSM6,ACTG1P13,ADAD1P2,ADAMTS19-AS1,AK3P5,ANKRD20A11P,ANKRD33B-AS1,ANKRD36P1,ANXA8,ARHGAP29-AS1,ARL14,ASB11,ATP5MDP1,B3GALT5,BASP1P1,BCAR4,BHMG1,BMP2KL,BNIP3P18,BNIP3P38,C10orf90,C10orf99,C11orf86,C12orf40,C20orf141,C21orf91-OT1,C5orf66-AS2,C8orf74,CALB2,CALCA,CASC18,CAV3,CCDC196,CD200R1L,CD200R1L-AS1,CDC20B,CDR1,CDSN,CEACAMP6,CELP,CHEK2P2,CIDEC,CLGN,CLLU1OS,CLRN1,CLRN3,CLYBL-AS1,COL5A1-A…	R-HSA-8939236	RUNX1 regulates transcription of genes involved in differentiation of HSCs	4.4582e-10
LUAD	ABCA17P,ACSM6,ACTG1P13,ADAD1P2,ADAMTS19-AS1,AK3P5,ANKRD20A11P,ANKRD33B-AS1,ANKRD36P1,ANXA8,ARHGAP29-AS1,ARL14,ASB11,ATP5MDP1,B3GALT5,BASP1P1,BCAR4,BHMG1,BMP2KL,BNIP3P18,BNIP3P38,C10orf90,C10orf99,C11orf86,C12orf40,C20orf141,C21orf91-OT1,C5orf66-AS2,C8orf74,CALB2,CALCA,CASC18,CAV3,CCDC196,CD200R1L,CD200R1L-AS1,CDC20B,CDR1,CDSN,CEACAMP6,CELP,CHEK2P2,CIDEC,CLGN,CLLU1OS,CLRN1,CLRN3,CLYBL-AS1,COL5A1-A…	R-HSA-5689901	Metalloprotease DUBs	1.10428e-09
LUAD	ABCA17P,ACSM6,ACTG1P13,ADAD1P2,ADAMTS19-AS1,AK3P5,ANKRD20A11P,ANKRD33B-AS1,ANKRD36P1,ANXA8,ARHGAP29-AS1,ARL14,ASB11,ATP5MDP1,B3GALT5,BASP1P1,BCAR4,BHMG1,BMP2KL,BNIP3P18,BNIP3P38,C10orf90,C10orf99,C11orf86,C12orf40,C20orf141,C21orf91-OT1,C5orf66-AS2,C8orf74,CALB2,CALCA,CASC18,CAV3,CCDC196,CD200R1L,CD200R1L-AS1,CDC20B,CDR1,CDSN,CEACAMP6,CELP,CHEK2P2,CIDEC,CLGN,CLLU1OS,CLRN1,CLRN3,CLYBL-AS1,COL5A1-A…	R-HSA-211000	Gene Silencing by RNA	1.40401e-09
LUAD	ABCA17P,ACSM6,ACTG1P13,ADAD1P2,ADAMTS19-AS1,AK3P5,ANKRD20A11P,ANKRD33B-AS1,ANKRD36P1,ANXA8,ARHGAP29-AS1,ARL14,ASB11,ATP5MDP1,B3GALT5,BASP1P1,BCAR4,BHMG1,BMP2KL,BNIP3P18,BNIP3P38,C10orf90,C10orf99,C11orf86,C12orf40,C20orf141,C21orf91-OT1,C5orf66-AS2,C8orf74,CALB2,CALCA,CASC18,CAV3,CCDC196,CD200R1L,CD200R1L-AS1,CDC20B,CDR1,CDSN,CEACAMP6,CELP,CHEK2P2,CIDEC,CLGN,CLLU1OS,CLRN1,CLRN3,CLYBL-AS1,COL5A1-A…	R-HSA-68875	Mitotic Prophase	2.26007e-09
LUAD	ABCA17P,ACSM6,ACTG1P13,ADAD1P2,ADAMTS19-AS1,AK3P5,ANKRD20A11P,ANKRD33B-AS1,ANKRD36P1,ANXA8,ARHGAP29-AS1,ARL14,ASB11,ATP5MDP1,B3GALT5,BASP1P1,BCAR4,BHMG1,BMP2KL,BNIP3P18,BNIP3P38,C10orf90,C10orf99,C11orf86,C12orf40,C20orf141,C21orf91-OT1,C5orf66-AS2,C8orf74,CALB2,CALCA,CASC18,CAV3,CCDC196,CD200R1L,CD200R1L-AS1,CDC20B,CDR1,CDSN,CEACAMP6,CELP,CHEK2P2,CIDEC,CLGN,CLLU1OS,CLRN1,CLRN3,CLYBL-AS1,COL5A1-A…	R-HSA-3247509	Chromatin modifying enzymes	2.67408e-09
LUAD	ABCA17P,ACSM6,ACTG1P13,ADAD1P2,ADAMTS19-AS1,AK3P5,ANKRD20A11P,ANKRD33B-AS1,ANKRD36P1,ANXA8,ARHGAP29-AS1,ARL14,ASB11,ATP5MDP1,B3GALT5,BASP1P1,BCAR4,BHMG1,BMP2KL,BNIP3P18,BNIP3P38,C10orf90,C10orf99,C11orf86,C12orf40,C20orf141,C21orf91-OT1,C5orf66-AS2,C8orf74,CALB2,CALCA,CASC18,CAV3,CCDC196,CD200R1L,CD200R1L-AS1,CDC20B,CDR1,CDSN,CEACAMP6,CELP,CHEK2P2,CIDEC,CLGN,CLLU1OS,CLRN1,CLRN3,CLYBL-AS1,COL5A1-A…	R-HSA-4839726	Chromatin organization	2.67408e-09
LUAD	ABCA17P,ACSM6,ACTG1P13,ADAD1P2,ADAMTS19-AS1,AK3P5,ANKRD20A11P,ANKRD33B-AS1,ANKRD36P1,ANXA8,ARHGAP29-AS1,ARL14,ASB11,ATP5MDP1,B3GALT5,BASP1P1,BCAR4,BHMG1,BMP2KL,BNIP3P18,BNIP3P38,C10orf90,C10orf99,C11orf86,C12orf40,C20orf141,C21orf91-OT1,C5orf66-AS2,C8orf74,CALB2,CALCA,CASC18,CAV3,CCDC196,CD200R1L,CD200R1L-AS1,CDC20B,CDR1,CDSN,CEACAMP6,CELP,CHEK2P2,CIDEC,CLGN,CLLU1OS,CLRN1,CLRN3,CLYBL-AS1,COL5A1-A…	R-HSA-1474165	Reproduction	2.84729e-09
LUAD	ABCA17P,ACSM6,ACTG1P13,ADAD1P2,ADAMTS19-AS1,AK3P5,ANKRD20A11P,ANKRD33B-AS1,ANKRD36P1,ANXA8,ARHGAP29-AS1,ARL14,ASB11,ATP5MDP1,B3GALT5,BASP1P1,BCAR4,BHMG1,BMP2KL,BNIP3P18,BNIP3P38,C10orf90,C10orf99,C11orf86,C12orf40,C20orf141,C21orf91-OT1,C5orf66-AS2,C8orf74,CALB2,CALCA,CASC18,CAV3,CCDC196,CD200R1L,CD200R1L-AS1,CDC20B,CDR1,CDSN,CEACAMP6,CELP,CHEK2P2,CIDEC,CLGN,CLLU1OS,CLRN1,CLRN3,CLYBL-AS1,COL5A1-A…	R-HSA-212165	Epigenetic regulation of gene expression	6.86951e-09
LUAD	ABCA17P,ACSM6,ACTG1P13,ADAD1P2,ADAMTS19-AS1,AK3P5,ANKRD20A11P,ANKRD33B-AS1,ANKRD36P1,ANXA8,ARHGAP29-AS1,ARL14,ASB11,ATP5MDP1,B3GALT5,BASP1P1,BCAR4,BHMG1,BMP2KL,BNIP3P18,BNIP3P38,C10orf90,C10orf99,C11orf86,C12orf40,C20orf141,C21orf91-OT1,C5orf66-AS2,C8orf74,CALB2,CALCA,CASC18,CAV3,CCDC196,CD200R1L,CD200R1L-AS1,CDC20B,CDR1,CDSN,CEACAMP6,CELP,CHEK2P2,CIDEC,CLGN,CLLU1OS,CLRN1,CLRN3,CLYBL-AS1,COL5A1-A…	R-HSA-201681	TCF dependent signaling in response to WNT	3.087e-08
LUAD	ABCA17P,ACSM6,ACTG1P13,ADAD1P2,ADAMTS19-AS1,AK3P5,ANKRD20A11P,ANKRD33B-AS1,ANKRD36P1,ANXA8,ARHGAP29-AS1,ARL14,ASB11,ATP5MDP1,B3GALT5,BASP1P1,BCAR4,BHMG1,BMP2KL,BNIP3P18,BNIP3P38,C10orf90,C10orf99,C11orf86,C12orf40,C20orf141,C21orf91-OT1,C5orf66-AS2,C8orf74,CALB2,CALCA,CASC18,CAV3,CCDC196,CD200R1L,CD200R1L-AS1,CDC20B,CDR1,CDSN,CEACAMP6,CELP,CHEK2P2,CIDEC,CLGN,CLLU1OS,CLRN1,CLRN3,CLYBL-AS1,COL5A1-A…	R-HSA-5689880	Ub-specific processing proteases	3.55077e-08
LUAD	ABCA17P,ACSM6,ACTG1P13,ADAD1P2,ADAMTS19-AS1,AK3P5,ANKRD20A11P,ANKRD33B-AS1,ANKRD36P1,ANXA8,ARHGAP29-AS1,ARL14,ASB11,ATP5MDP1,B3GALT5,BASP1P1,BCAR4,BHMG1,BMP2KL,BNIP3P18,BNIP3P38,C10orf90,C10orf99,C11orf86,C12orf40,C20orf141,C21orf91-OT1,C5orf66-AS2,C8orf74,CALB2,CALCA,CASC18,CAV3,CCDC196,CD200R1L,CD200R1L-AS1,CDC20B,CDR1,CDSN,CEACAMP6,CELP,CHEK2P2,CIDEC,CLGN,CLLU1OS,CLRN1,CLRN3,CLYBL-AS1,COL5A1-A…	R-HSA-157118	Signaling by NOTCH	7.46607e-08
LUAD	ABCA17P,ACSM6,ACTG1P13,ADAD1P2,ADAMTS19-AS1,AK3P5,ANKRD20A11P,ANKRD33B-AS1,ANKRD36P1,ANXA8,ARHGAP29-AS1,ARL14,ASB11,ATP5MDP1,B3GALT5,BASP1P1,BCAR4,BHMG1,BMP2KL,BNIP3P18,BNIP3P38,C10orf90,C10orf99,C11orf86,C12orf40,C20orf141,C21orf91-OT1,C5orf66-AS2,C8orf74,CALB2,CALCA,CASC18,CAV3,CCDC196,CD200R1L,CD200R1L-AS1,CDC20B,CDR1,CDSN,CEACAMP6,CELP,CHEK2P2,CIDEC,CLGN,CLLU1OS,CLRN1,CLRN3,CLYBL-AS1,COL5A1-A…	R-HSA-8939211	ESR-mediated signaling	1.76333e-07
LUAD	ABCA17P,ACSM6,ACTG1P13,ADAD1P2,ADAMTS19-AS1,AK3P5,ANKRD20A11P,ANKRD33B-AS1,ANKRD36P1,ANXA8,ARHGAP29-AS1,ARL14,ASB11,ATP5MDP1,B3GALT5,BASP1P1,BCAR4,BHMG1,BMP2KL,BNIP3P18,BNIP3P38,C10orf90,C10orf99,C11orf86,C12orf40,C20orf141,C21orf91-OT1,C5orf66-AS2,C8orf74,CALB2,CALCA,CASC18,CAV3,CCDC196,CD200R1L,CD200R1L-AS1,CDC20B,CDR1,CDSN,CEACAMP6,CELP,CHEK2P2,CIDEC,CLGN,CLLU1OS,CLRN1,CLRN3,CLYBL-AS1,COL5A1-A…	R-HSA-195721	Signaling by WNT	8.32214e-07
LUAD	ABCA17P,ACSM6,ACTG1P13,ADAD1P2,ADAMTS19-AS1,AK3P5,ANKRD20A11P,ANKRD33B-AS1,ANKRD36P1,ANXA8,ARHGAP29-AS1,ARL14,ASB11,ATP5MDP1,B3GALT5,BASP1P1,BCAR4,BHMG1,BMP2KL,BNIP3P18,BNIP3P38,C10orf90,C10orf99,C11orf86,C12orf40,C20orf141,C21orf91-OT1,C5orf66-AS2,C8orf74,CALB2,CALCA,CASC18,CAV3,CCDC196,CD200R1L,CD200R1L-AS1,CDC20B,CDR1,CDSN,CEACAMP6,CELP,CHEK2P2,CIDEC,CLGN,CLLU1OS,CLRN1,CLRN3,CLYBL-AS1,COL5A1-A…	R-HSA-8878171	Transcriptional regulation by RUNX1	9.42927e-07
LUAD	ABCA17P,ACSM6,ACTG1P13,ADAD1P2,ADAMTS19-AS1,AK3P5,ANKRD20A11P,ANKRD33B-AS1,ANKRD36P1,ANXA8,ARHGAP29-AS1,ARL14,ASB11,ATP5MDP1,B3GALT5,BASP1P1,BCAR4,BHMG1,BMP2KL,BNIP3P18,BNIP3P38,C10orf90,C10orf99,C11orf86,C12orf40,C20orf141,C21orf91-OT1,C5orf66-AS2,C8orf74,CALB2,CALCA,CASC18,CAV3,CCDC196,CD200R1L,CD200R1L-AS1,CDC20B,CDR1,CDSN,CEACAMP6,CELP,CHEK2P2,CIDEC,CLGN,CLLU1OS,CLRN1,CLRN3,CLYBL-AS1,COL5A1-A…	R-HSA-9006931	Signaling by Nuclear Receptors	1.85991e-06
LUAD	ABCA17P,ACSM6,ACTG1P13,ADAD1P2,ADAMTS19-AS1,AK3P5,ANKRD20A11P,ANKRD33B-AS1,ANKRD36P1,ANXA8,ARHGAP29-AS1,ARL14,ASB11,ATP5MDP1,B3GALT5,BASP1P1,BCAR4,BHMG1,BMP2KL,BNIP3P18,BNIP3P38,C10orf90,C10orf99,C11orf86,C12orf40,C20orf141,C21orf91-OT1,C5orf66-AS2,C8orf74,CALB2,CALCA,CASC18,CAV3,CCDC196,CD200R1L,CD200R1L-AS1,CDC20B,CDR1,CDSN,CEACAMP6,CELP,CHEK2P2,CIDEC,CLGN,CLLU1OS,CLRN1,CLRN3,CLYBL-AS1,COL5A1-A…	R-HSA-5688426	Deubiquitination	3.04774e-06
LUAD	ABCA17P,ACSM6,ACTG1P13,ADAD1P2,ADAMTS19-AS1,AK3P5,ANKRD20A11P,ANKRD33B-AS1,ANKRD36P1,ANXA8,ARHGAP29-AS1,ARL14,ASB11,ATP5MDP1,B3GALT5,BASP1P1,BCAR4,BHMG1,BMP2KL,BNIP3P18,BNIP3P38,C10orf90,C10orf99,C11orf86,C12orf40,C20orf141,C21orf91-OT1,C5orf66-AS2,C8orf74,CALB2,CALCA,CASC18,CAV3,CCDC196,CD200R1L,CD200R1L-AS1,CDC20B,CDR1,CDSN,CEACAMP6,CELP,CHEK2P2,CIDEC,CLGN,CLLU1OS,CLRN1,CLRN3,CLYBL-AS1,COL5A1-A…	R-HSA-2262752	Cellular responses to stress	5.36596e-06
LUAD	ABCA17P,ACSM6,ACTG1P13,ADAD1P2,ADAMTS19-AS1,AK3P5,ANKRD20A11P,ANKRD33B-AS1,ANKRD36P1,ANXA8,ARHGAP29-AS1,ARL14,ASB11,ATP5MDP1,B3GALT5,BASP1P1,BCAR4,BHMG1,BMP2KL,BNIP3P18,BNIP3P38,C10orf90,C10orf99,C11orf86,C12orf40,C20orf141,C21orf91-OT1,C5orf66-AS2,C8orf74,CALB2,CALCA,CASC18,CAV3,CCDC196,CD200R1L,CD200R1L-AS1,CDC20B,CDR1,CDSN,CEACAMP6,CELP,CHEK2P2,CIDEC,CLGN,CLLU1OS,CLRN1,CLRN3,CLYBL-AS1,COL5A1-A…	R-HSA-8953897	Cellular responses to external stimuli	8.69287e-06
LUAD	ABCA17P,ACSM6,ACTG1P13,ADAD1P2,ADAMTS19-AS1,AK3P5,ANKRD20A11P,ANKRD33B-AS1,ANKRD36P1,ANXA8,ARHGAP29-AS1,ARL14,ASB11,ATP5MDP1,B3GALT5,BASP1P1,BCAR4,BHMG1,BMP2KL,BNIP3P18,BNIP3P38,C10orf90,C10orf99,C11orf86,C12orf40,C20orf141,C21orf91-OT1,C5orf66-AS2,C8orf74,CALB2,CALCA,CASC18,CAV3,CCDC196,CD200R1L,CD200R1L-AS1,CDC20B,CDR1,CDSN,CEACAMP6,CELP,CHEK2P2,CIDEC,CLGN,CLLU1OS,CLRN1,CLRN3,CLYBL-AS1,COL5A1-A…	R-HSA-5689603	UCH proteinases	4.8083e-05
LUAD	ABCA17P,ACSM6,ACTG1P13,ADAD1P2,ADAMTS19-AS1,AK3P5,ANKRD20A11P,ANKRD33B-AS1,ANKRD36P1,ANXA8,ARHGAP29-AS1,ARL14,ASB11,ATP5MDP1,B3GALT5,BASP1P1,BCAR4,BHMG1,BMP2KL,BNIP3P18,BNIP3P38,C10orf90,C10orf99,C11orf86,C12orf40,C20orf141,C21orf91-OT1,C5orf66-AS2,C8orf74,CALB2,CALCA,CASC18,CAV3,CCDC196,CD200R1L,CD200R1L-AS1,CDC20B,CDR1,CDSN,CEACAMP6,CELP,CHEK2P2,CIDEC,CLGN,CLLU1OS,CLRN1,CLRN3,CLYBL-AS1,COL5A1-A…	R-HSA-5693571	Nonhomologous End-Joining (NHEJ)	0.000144035
LUAD	ABCA17P,ACSM6,ACTG1P13,ADAD1P2,ADAMTS19-AS1,AK3P5,ANKRD20A11P,ANKRD33B-AS1,ANKRD36P1,ANXA8,ARHGAP29-AS1,ARL14,ASB11,ATP5MDP1,B3GALT5,BASP1P1,BCAR4,BHMG1,BMP2KL,BNIP3P18,BNIP3P38,C10orf90,C10orf99,C11orf86,C12orf40,C20orf141,C21orf91-OT1,C5orf66-AS2,C8orf74,CALB2,CALCA,CASC18,CAV3,CCDC196,CD200R1L,CD200R1L-AS1,CDC20B,CDR1,CDSN,CEACAMP6,CELP,CHEK2P2,CIDEC,CLGN,CLLU1OS,CLRN1,CLRN3,CLYBL-AS1,COL5A1-A…	R-HSA-195258	RHO GTPase Effectors	0.000144996
LUAD	ABCA17P,ACSM6,ACTG1P13,ADAD1P2,ADAMTS19-AS1,AK3P5,ANKRD20A11P,ANKRD33B-AS1,ANKRD36P1,ANXA8,ARHGAP29-AS1,ARL14,ASB11,ATP5MDP1,B3GALT5,BASP1P1,BCAR4,BHMG1,BMP2KL,BNIP3P18,BNIP3P38,C10orf90,C10orf99,C11orf86,C12orf40,C20orf141,C21orf91-OT1,C5orf66-AS2,C8orf74,CALB2,CALCA,CASC18,CAV3,CCDC196,CD200R1L,CD200R1L-AS1,CDC20B,CDR1,CDSN,CEACAMP6,CELP,CHEK2P2,CIDEC,CLGN,CLLU1OS,CLRN1,CLRN3,CLYBL-AS1,COL5A1-A…	R-HSA-5693565	Recruitment and ATM-mediated phosphorylation of repair and signaling proteins at DNA double strand breaks	0.000352571
LUAD	ABCA17P,ACSM6,ACTG1P13,ADAD1P2,ADAMTS19-AS1,AK3P5,ANKRD20A11P,ANKRD33B-AS1,ANKRD36P1,ANXA8,ARHGAP29-AS1,ARL14,ASB11,ATP5MDP1,B3GALT5,BASP1P1,BCAR4,BHMG1,BMP2KL,BNIP3P18,BNIP3P38,C10orf90,C10orf99,C11orf86,C12orf40,C20orf141,C21orf91-OT1,C5orf66-AS2,C8orf74,CALB2,CALCA,CASC18,CAV3,CCDC196,CD200R1L,CD200R1L-AS1,CDC20B,CDR1,CDSN,CEACAMP6,CELP,CHEK2P2,CIDEC,CLGN,CLLU1OS,CLRN1,CLRN3,CLYBL-AS1,COL5A1-A…	R-HSA-5693606	DNA Double Strand Break Response	0.000396814
LUAD	ABCA17P,ACSM6,ACTG1P13,ADAD1P2,ADAMTS19-AS1,AK3P5,ANKRD20A11P,ANKRD33B-AS1,ANKRD36P1,ANXA8,ARHGAP29-AS1,ARL14,ASB11,ATP5MDP1,B3GALT5,BASP1P1,BCAR4,BHMG1,BMP2KL,BNIP3P18,BNIP3P38,C10orf90,C10orf99,C11orf86,C12orf40,C20orf141,C21orf91-OT1,C5orf66-AS2,C8orf74,CALB2,CALCA,CASC18,CAV3,CCDC196,CD200R1L,CD200R1L-AS1,CDC20B,CDR1,CDSN,CEACAMP6,CELP,CHEK2P2,CIDEC,CLGN,CLLU1OS,CLRN1,CLRN3,CLYBL-AS1,COL5A1-A…	R-HSA-68886	M Phase	0.00226523
LUAD	ABCA17P,ACSM6,ACTG1P13,ADAD1P2,ADAMTS19-AS1,AK3P5,ANKRD20A11P,ANKRD33B-AS1,ANKRD36P1,ANXA8,ARHGAP29-AS1,ARL14,ASB11,ATP5MDP1,B3GALT5,BASP1P1,BCAR4,BHMG1,BMP2KL,BNIP3P18,BNIP3P38,C10orf90,C10orf99,C11orf86,C12orf40,C20orf141,C21orf91-OT1,C5orf66-AS2,C8orf74,CALB2,CALCA,CASC18,CAV3,CCDC196,CD200R1L,CD200R1L-AS1,CDC20B,CDR1,CDSN,CEACAMP6,CELP,CHEK2P2,CIDEC,CLGN,CLLU1OS,CLRN1,CLRN3,CLYBL-AS1,COL5A1-A…	R-HSA-69473	G2/M DNA damage checkpoint	0.00244385
LUAD	ABCA17P,ACSM6,ACTG1P13,ADAD1P2,ADAMTS19-AS1,AK3P5,ANKRD20A11P,ANKRD33B-AS1,ANKRD36P1,ANXA8,ARHGAP29-AS1,ARL14,ASB11,ATP5MDP1,B3GALT5,BASP1P1,BCAR4,BHMG1,BMP2KL,BNIP3P18,BNIP3P38,C10orf90,C10orf99,C11orf86,C12orf40,C20orf141,C21orf91-OT1,C5orf66-AS2,C8orf74,CALB2,CALCA,CASC18,CAV3,CCDC196,CD200R1L,CD200R1L-AS1,CDC20B,CDR1,CDSN,CEACAMP6,CELP,CHEK2P2,CIDEC,CLGN,CLLU1OS,CLRN1,CLRN3,CLYBL-AS1,COL5A1-A…	R-HSA-5693607	Processing of DNA double-strand break ends	0.0031608
LUAD	ABCA17P,ACSM6,ACTG1P13,ADAD1P2,ADAMTS19-AS1,AK3P5,ANKRD20A11P,ANKRD33B-AS1,ANKRD36P1,ANXA8,ARHGAP29-AS1,ARL14,ASB11,ATP5MDP1,B3GALT5,BASP1P1,BCAR4,BHMG1,BMP2KL,BNIP3P18,BNIP3P38,C10orf90,C10orf99,C11orf86,C12orf40,C20orf141,C21orf91-OT1,C5orf66-AS2,C8orf74,CALB2,CALCA,CASC18,CAV3,CCDC196,CD200R1L,CD200R1L-AS1,CDC20B,CDR1,CDSN,CEACAMP6,CELP,CHEK2P2,CIDEC,CLGN,CLLU1OS,CLRN1,CLRN3,CLYBL-AS1,COL5A1-A…	R-HSA-140342	Apoptosis induced DNA fragmentation	0.00316991
LUAD	ABCA17P,ACSM6,ACTG1P13,ADAD1P2,ADAMTS19-AS1,AK3P5,ANKRD20A11P,ANKRD33B-AS1,ANKRD36P1,ANXA8,ARHGAP29-AS1,ARL14,ASB11,ATP5MDP1,B3GALT5,BASP1P1,BCAR4,BHMG1,BMP2KL,BNIP3P18,BNIP3P38,C10orf90,C10orf99,C11orf86,C12orf40,C20orf141,C21orf91-OT1,C5orf66-AS2,C8orf74,CALB2,CALCA,CASC18,CAV3,CCDC196,CD200R1L,CD200R1L-AS1,CDC20B,CDR1,CDSN,CEACAMP6,CELP,CHEK2P2,CIDEC,CLGN,CLLU1OS,CLRN1,CLRN3,CLYBL-AS1,COL5A1-A…	R-HSA-1266738	Developmental Biology	0.0033418
LUAD	ABCA17P,ACSM6,ACTG1P13,ADAD1P2,ADAMTS19-AS1,AK3P5,ANKRD20A11P,ANKRD33B-AS1,ANKRD36P1,ANXA8,ARHGAP29-AS1,ARL14,ASB11,ATP5MDP1,B3GALT5,BASP1P1,BCAR4,BHMG1,BMP2KL,BNIP3P18,BNIP3P38,C10orf90,C10orf99,C11orf86,C12orf40,C20orf141,C21orf91-OT1,C5orf66-AS2,C8orf74,CALB2,CALCA,CASC18,CAV3,CCDC196,CD200R1L,CD200R1L-AS1,CDC20B,CDR1,CDSN,CEACAMP6,CELP,CHEK2P2,CIDEC,CLGN,CLLU1OS,CLRN1,CLRN3,CLYBL-AS1,COL5A1-A…	R-HSA-73894	DNA Repair	0.00408242
LUAD	ABCA17P,ACSM6,ACTG1P13,ADAD1P2,ADAMTS19-AS1,AK3P5,ANKRD20A11P,ANKRD33B-AS1,ANKRD36P1,ANXA8,ARHGAP29-AS1,ARL14,ASB11,ATP5MDP1,B3GALT5,BASP1P1,BCAR4,BHMG1,BMP2KL,BNIP3P18,BNIP3P38,C10orf90,C10orf99,C11orf86,C12orf40,C20orf141,C21orf91-OT1,C5orf66-AS2,C8orf74,CALB2,CALCA,CASC18,CAV3,CCDC196,CD200R1L,CD200R1L-AS1,CDC20B,CDR1,CDSN,CEACAMP6,CELP,CHEK2P2,CIDEC,CLGN,CLLU1OS,CLRN1,CLRN3,CLYBL-AS1,COL5A1-A…	R-HSA-8866654	E3 ubiquitin ligases ubiquitinate target proteins	0.00566913
LUAD	ABCA17P,ACSM6,ACTG1P13,ADAD1P2,ADAMTS19-AS1,AK3P5,ANKRD20A11P,ANKRD33B-AS1,ANKRD36P1,ANXA8,ARHGAP29-AS1,ARL14,ASB11,ATP5MDP1,B3GALT5,BASP1P1,BCAR4,BHMG1,BMP2KL,BNIP3P18,BNIP3P38,C10orf90,C10orf99,C11orf86,C12orf40,C20orf141,C21orf91-OT1,C5orf66-AS2,C8orf74,CALB2,CALCA,CASC18,CAV3,CCDC196,CD200R1L,CD200R1L-AS1,CDC20B,CDR1,CDSN,CEACAMP6,CELP,CHEK2P2,CIDEC,CLGN,CLLU1OS,CLRN1,CLRN3,CLYBL-AS1,COL5A1-A…	R-HSA-2559584	Formation of Senescence-Associated Heterochromatin Foci (SAHF)	0.0103273
LUAD	ABCA17P,ACSM6,ACTG1P13,ADAD1P2,ADAMTS19-AS1,AK3P5,ANKRD20A11P,ANKRD33B-AS1,ANKRD36P1,ANXA8,ARHGAP29-AS1,ARL14,ASB11,ATP5MDP1,B3GALT5,BASP1P1,BCAR4,BHMG1,BMP2KL,BNIP3P18,BNIP3P38,C10orf90,C10orf99,C11orf86,C12orf40,C20orf141,C21orf91-OT1,C5orf66-AS2,C8orf74,CALB2,CALCA,CASC18,CAV3,CCDC196,CD200R1L,CD200R1L-AS1,CDC20B,CDR1,CDSN,CEACAMP6,CELP,CHEK2P2,CIDEC,CLGN,CLLU1OS,CLRN1,CLRN3,CLYBL-AS1,COL5A1-A…	R-HSA-194315	Signaling by Rho GTPases	0.0114912
LUAD	ABCA17P,ACSM6,ACTG1P13,ADAD1P2,ADAMTS19-AS1,AK3P5,ANKRD20A11P,ANKRD33B-AS1,ANKRD36P1,ANXA8,ARHGAP29-AS1,ARL14,ASB11,ATP5MDP1,B3GALT5,BASP1P1,BCAR4,BHMG1,BMP2KL,BNIP3P18,BNIP3P38,C10orf90,C10orf99,C11orf86,C12orf40,C20orf141,C21orf91-OT1,C5orf66-AS2,C8orf74,CALB2,CALCA,CASC18,CAV3,CCDC196,CD200R1L,CD200R1L-AS1,CDC20B,CDR1,CDSN,CEACAMP6,CELP,CHEK2P2,CIDEC,CLGN,CLLU1OS,CLRN1,CLRN3,CLYBL-AS1,COL5A1-A…	R-HSA-5693567	HDR through Homologous Recombination (HRR) or Single Strand Annealing (SSA)	0.0308682
LUAD	ABCA17P,ACSM6,ACTG1P13,ADAD1P2,ADAMTS19-AS1,AK3P5,ANKRD20A11P,ANKRD33B-AS1,ANKRD36P1,ANXA8,ARHGAP29-AS1,ARL14,ASB11,ATP5MDP1,B3GALT5,BASP1P1,BCAR4,BHMG1,BMP2KL,BNIP3P18,BNIP3P38,C10orf90,C10orf99,C11orf86,C12orf40,C20orf141,C21orf91-OT1,C5orf66-AS2,C8orf74,CALB2,CALCA,CASC18,CAV3,CCDC196,CD200R1L,CD200R1L-AS1,CDC20B,CDR1,CDSN,CEACAMP6,CELP,CHEK2P2,CIDEC,CLGN,CLLU1OS,CLRN1,CLRN3,CLYBL-AS1,COL5A1-A…	R-HSA-8852135	Protein ubiquitination	0.0330404
LUAD	ABCA17P,ACSM6,ACTG1P13,ADAD1P2,ADAMTS19-AS1,AK3P5,ANKRD20A11P,ANKRD33B-AS1,ANKRD36P1,ANXA8,ARHGAP29-AS1,ARL14,ASB11,ATP5MDP1,B3GALT5,BASP1P1,BCAR4,BHMG1,BMP2KL,BNIP3P18,BNIP3P38,C10orf90,C10orf99,C11orf86,C12orf40,C20orf141,C21orf91-OT1,C5orf66-AS2,C8orf74,CALB2,CALCA,CASC18,CAV3,CCDC196,CD200R1L,CD200R1L-AS1,CDC20B,CDR1,CDSN,CEACAMP6,CELP,CHEK2P2,CIDEC,CLGN,CLLU1OS,CLRN1,CLRN3,CLYBL-AS1,COL5A1-A…	R-HSA-5693538	Homology Directed Repair	0.043099
LUSC	A1CF,AADACL2,ABCG5,ABHD12B,ACMSD,ACP7,ACSM2A,ADAMTS19-AS1,ADGRA1-AS1,AGT,AMER3,ANKRD30BP2,ANKRD34B,ANKS4B,AOX3P,APOA4,APOC4-APOC2,APOM,ARPP21,ASB15,ASB18,ASCL1,ASCL5,ASNSP6,ATP8A2P3,BOD1L2,BPESC1,BPIFC,BRDT,C13orf42,C15orf32,C16orf82,C16orf97,C1orf105,C1orf127,C1QL4,C1QTNF9,C2orf78,C8A,CA5A,CA6,CBLIF,CCDC105,CCER1,CEACAMP9,CFHR1,CHCHD2P4,CHIAP1,CNPY1,CNR2,CPN2,CRCT1,CT83,CTBP2P1,CTXN2,CUL1P1,CYP1…	R-HSA-388396	GPCR downstream signalling	0.000390639
LUSC	A1CF,AADACL2,ABCG5,ABHD12B,ACMSD,ACP7,ACSM2A,ADAMTS19-AS1,ADGRA1-AS1,AGT,AMER3,ANKRD30BP2,ANKRD34B,ANKS4B,AOX3P,APOA4,APOC4-APOC2,APOM,ARPP21,ASB15,ASB18,ASCL1,ASCL5,ASNSP6,ATP8A2P3,BOD1L2,BPESC1,BPIFC,BRDT,C13orf42,C15orf32,C16orf82,C16orf97,C1orf105,C1orf127,C1QL4,C1QTNF9,C2orf78,C8A,CA5A,CA6,CBLIF,CCDC105,CCER1,CEACAMP9,CFHR1,CHCHD2P4,CHIAP1,CNPY1,CNR2,CPN2,CRCT1,CT83,CTBP2P1,CTXN2,CUL1P1,CYP1…	R-HSA-372790	Signaling by GPCR	0.000821731
LUSC	A1CF,AADACL2,ABCG5,ABHD12B,ACMSD,ACP7,ACSM2A,ADAMTS19-AS1,ADGRA1-AS1,AGT,AMER3,ANKRD30BP2,ANKRD34B,ANKS4B,AOX3P,APOA4,APOC4-APOC2,APOM,ARPP21,ASB15,ASB18,ASCL1,ASCL5,ASNSP6,ATP8A2P3,BOD1L2,BPESC1,BPIFC,BRDT,C13orf42,C15orf32,C16orf82,C16orf97,C1orf105,C1orf127,C1QL4,C1QTNF9,C2orf78,C8A,CA5A,CA6,CBLIF,CCDC105,CCER1,CEACAMP9,CFHR1,CHCHD2P4,CHIAP1,CNPY1,CNR2,CPN2,CRCT1,CT83,CTBP2P1,CTXN2,CUL1P1,CYP1…	R-HSA-418555	G alpha (s) signalling events	0.0288122
LUSC	A1CF,AADACL2,ABCG5,ABHD12B,ACMSD,ACP7,ACSM2A,ADAMTS19-AS1,ADGRA1-AS1,AGT,AMER3,ANKRD30BP2,ANKRD34B,ANKS4B,AOX3P,APOA4,APOC4-APOC2,APOM,ARPP21,ASB15,ASB18,ASCL1,ASCL5,ASNSP6,ATP8A2P3,BOD1L2,BPESC1,BPIFC,BRDT,C13orf42,C15orf32,C16orf82,C16orf97,C1orf105,C1orf127,C1QL4,C1QTNF9,C2orf78,C8A,CA5A,CA6,CBLIF,CCDC105,CCER1,CEACAMP9,CFHR1,CHCHD2P4,CHIAP1,CNPY1,CNR2,CPN2,CRCT1,CT83,CTBP2P1,CTXN2,CUL1P1,CYP1…	R-HSA-162582	Signal Transduction	0.0372771
LUSC	A1CF,AADACL2,ABCG5,ABHD12B,ACMSD,ACP7,ACSM2A,ADAMTS19-AS1,ADGRA1-AS1,AGT,AMER3,ANKRD30BP2,ANKRD34B,ANKS4B,AOX3P,APOA4,APOC4-APOC2,APOM,ARPP21,ASB15,ASB18,ASCL1,ASCL5,ASNSP6,ATP8A2P3,BOD1L2,BPESC1,BPIFC,BRDT,C13orf42,C15orf32,C16orf82,C16orf97,C1orf105,C1orf127,C1QL4,C1QTNF9,C2orf78,C8A,CA5A,CA6,CBLIF,CCDC105,CCER1,CEACAMP9,CFHR1,CHCHD2P4,CHIAP1,CNPY1,CNR2,CPN2,CRCT1,CT83,CTBP2P1,CTXN2,CUL1P1,CYP1…	R-HSA-373076	Class A/1 (Rhodopsin-like receptors)	0.042004
OV	,ACTRT2,ADARB2-AS1,ADH1B,ADIPOQ,AFAP1-AS1,AKR1B10,ALDH1L1-AS2,ALKAL2,ALPI,AMBN,AMY1B,ANKRD30BP1,ANKRD66,AQP4-AS1,ARHGAP27P2,AWAT1,BAGE2,BARX1-DT,BCO1,BEND4,BLK,BMP15,BNIP3P34,BNIP3P9,C10orf62,C10orf71,C17orf77,C1orf194,C1orf87,C20orf85,C5orf52,C6orf15,C8orf49,CALML5,CALR3,CCDC190,CCKAR,CCL15,CCNQP1,CDC20B,CFAP65,CGB1,CGB5,CHRNB2,CHRND,CLEC2A,CLEC2L,CLEC6A,CNN2P3,CNN2P8,COL2A1,CROCC2,CRYGEP,CT45A1…	R-HSA-983695	Antigen activates B Cell Receptor (BCR) leading to generation of second messengers	6.59029e-08
OV	,ACTRT2,ADARB2-AS1,ADH1B,ADIPOQ,AFAP1-AS1,AKR1B10,ALDH1L1-AS2,ALKAL2,ALPI,AMBN,AMY1B,ANKRD30BP1,ANKRD66,AQP4-AS1,ARHGAP27P2,AWAT1,BAGE2,BARX1-DT,BCO1,BEND4,BLK,BMP15,BNIP3P34,BNIP3P9,C10orf62,C10orf71,C17orf77,C1orf194,C1orf87,C20orf85,C5orf52,C6orf15,C8orf49,CALML5,CALR3,CCDC190,CCKAR,CCL15,CCNQP1,CDC20B,CFAP65,CGB1,CGB5,CHRNB2,CHRND,CLEC2A,CLEC2L,CLEC6A,CNN2P3,CNN2P8,COL2A1,CROCC2,CRYGEP,CT45A1…	R-HSA-5690714	CD22 mediated BCR regulation	1.81509e-07
OV	,ACTRT2,ADARB2-AS1,ADH1B,ADIPOQ,AFAP1-AS1,AKR1B10,ALDH1L1-AS2,ALKAL2,ALPI,AMBN,AMY1B,ANKRD30BP1,ANKRD66,AQP4-AS1,ARHGAP27P2,AWAT1,BAGE2,BARX1-DT,BCO1,BEND4,BLK,BMP15,BNIP3P34,BNIP3P9,C10orf62,C10orf71,C17orf77,C1orf194,C1orf87,C20orf85,C5orf52,C6orf15,C8orf49,CALML5,CALR3,CCDC190,CCKAR,CCL15,CCNQP1,CDC20B,CFAP65,CGB1,CGB5,CHRNB2,CHRND,CLEC2A,CLEC2L,CLEC6A,CNN2P3,CNN2P8,COL2A1,CROCC2,CRYGEP,CT45A1…	R-HSA-977606	Regulation of Complement cascade	9.08738e-07
OV	,ACTRT2,ADARB2-AS1,ADH1B,ADIPOQ,AFAP1-AS1,AKR1B10,ALDH1L1-AS2,ALKAL2,ALPI,AMBN,AMY1B,ANKRD30BP1,ANKRD66,AQP4-AS1,ARHGAP27P2,AWAT1,BAGE2,BARX1-DT,BCO1,BEND4,BLK,BMP15,BNIP3P34,BNIP3P9,C10orf62,C10orf71,C17orf77,C1orf194,C1orf87,C20orf85,C5orf52,C6orf15,C8orf49,CALML5,CALR3,CCDC190,CCKAR,CCL15,CCNQP1,CDC20B,CFAP65,CGB1,CGB5,CHRNB2,CHRND,CLEC2A,CLEC2L,CLEC6A,CNN2P3,CNN2P8,COL2A1,CROCC2,CRYGEP,CT45A1…	R-HSA-173623	Classical antibody-mediated complement activation	1.1756e-06
OV	,ACTRT2,ADARB2-AS1,ADH1B,ADIPOQ,AFAP1-AS1,AKR1B10,ALDH1L1-AS2,ALKAL2,ALPI,AMBN,AMY1B,ANKRD30BP1,ANKRD66,AQP4-AS1,ARHGAP27P2,AWAT1,BAGE2,BARX1-DT,BCO1,BEND4,BLK,BMP15,BNIP3P34,BNIP3P9,C10orf62,C10orf71,C17orf77,C1orf194,C1orf87,C20orf85,C5orf52,C6orf15,C8orf49,CALML5,CALR3,CCDC190,CCKAR,CCL15,CCNQP1,CDC20B,CFAP65,CGB1,CGB5,CHRNB2,CHRND,CLEC2A,CLEC2L,CLEC6A,CNN2P3,CNN2P8,COL2A1,CROCC2,CRYGEP,CT45A1…	R-HSA-2730905	Role of LAT2/NTAL/LAB on calcium mobilization	1.68361e-06
OV	,ACTRT2,ADARB2-AS1,ADH1B,ADIPOQ,AFAP1-AS1,AKR1B10,ALDH1L1-AS2,ALKAL2,ALPI,AMBN,AMY1B,ANKRD30BP1,ANKRD66,AQP4-AS1,ARHGAP27P2,AWAT1,BAGE2,BARX1-DT,BCO1,BEND4,BLK,BMP15,BNIP3P34,BNIP3P9,C10orf62,C10orf71,C17orf77,C1orf194,C1orf87,C20orf85,C5orf52,C6orf15,C8orf49,CALML5,CALR3,CCDC190,CCKAR,CCL15,CCNQP1,CDC20B,CFAP65,CGB1,CGB5,CHRNB2,CHRND,CLEC2A,CLEC2L,CLEC6A,CNN2P3,CNN2P8,COL2A1,CROCC2,CRYGEP,CT45A1…	R-HSA-2168880	Scavenging of heme from plasma	1.68361e-06
OV	,ACTRT2,ADARB2-AS1,ADH1B,ADIPOQ,AFAP1-AS1,AKR1B10,ALDH1L1-AS2,ALKAL2,ALPI,AMBN,AMY1B,ANKRD30BP1,ANKRD66,AQP4-AS1,ARHGAP27P2,AWAT1,BAGE2,BARX1-DT,BCO1,BEND4,BLK,BMP15,BNIP3P34,BNIP3P9,C10orf62,C10orf71,C17orf77,C1orf194,C1orf87,C20orf85,C5orf52,C6orf15,C8orf49,CALML5,CALR3,CCDC190,CCKAR,CCL15,CCNQP1,CDC20B,CFAP65,CGB1,CGB5,CHRNB2,CHRND,CLEC2A,CLEC2L,CLEC6A,CNN2P3,CNN2P8,COL2A1,CROCC2,CRYGEP,CT45A1…	R-HSA-166658	Complement cascade	1.90541e-06
OV	,ACTRT2,ADARB2-AS1,ADH1B,ADIPOQ,AFAP1-AS1,AKR1B10,ALDH1L1-AS2,ALKAL2,ALPI,AMBN,AMY1B,ANKRD30BP1,ANKRD66,AQP4-AS1,ARHGAP27P2,AWAT1,BAGE2,BARX1-DT,BCO1,BEND4,BLK,BMP15,BNIP3P34,BNIP3P9,C10orf62,C10orf71,C17orf77,C1orf194,C1orf87,C20orf85,C5orf52,C6orf15,C8orf49,CALML5,CALR3,CCDC190,CCKAR,CCL15,CCNQP1,CDC20B,CFAP65,CGB1,CGB5,CHRNB2,CHRND,CLEC2A,CLEC2L,CLEC6A,CNN2P3,CNN2P8,COL2A1,CROCC2,CRYGEP,CT45A1…	R-HSA-2029481	FCGR activation	2.00228e-06
OV	,ACTRT2,ADARB2-AS1,ADH1B,ADIPOQ,AFAP1-AS1,AKR1B10,ALDH1L1-AS2,ALKAL2,ALPI,AMBN,AMY1B,ANKRD30BP1,ANKRD66,AQP4-AS1,ARHGAP27P2,AWAT1,BAGE2,BARX1-DT,BCO1,BEND4,BLK,BMP15,BNIP3P34,BNIP3P9,C10orf62,C10orf71,C17orf77,C1orf194,C1orf87,C20orf85,C5orf52,C6orf15,C8orf49,CALML5,CALR3,CCDC190,CCKAR,CCL15,CCNQP1,CDC20B,CFAP65,CGB1,CGB5,CHRNB2,CHRND,CLEC2A,CLEC2L,CLEC6A,CNN2P3,CNN2P8,COL2A1,CROCC2,CRYGEP,CT45A1…	R-HSA-166786	Creation of C4 and C2 activators	2.37196e-06
OV	,ACTRT2,ADARB2-AS1,ADH1B,ADIPOQ,AFAP1-AS1,AKR1B10,ALDH1L1-AS2,ALKAL2,ALPI,AMBN,AMY1B,ANKRD30BP1,ANKRD66,AQP4-AS1,ARHGAP27P2,AWAT1,BAGE2,BARX1-DT,BCO1,BEND4,BLK,BMP15,BNIP3P34,BNIP3P9,C10orf62,C10orf71,C17orf77,C1orf194,C1orf87,C20orf85,C5orf52,C6orf15,C8orf49,CALML5,CALR3,CCDC190,CCKAR,CCL15,CCNQP1,CDC20B,CFAP65,CGB1,CGB5,CHRNB2,CHRND,CLEC2A,CLEC2L,CLEC6A,CNN2P3,CNN2P8,COL2A1,CROCC2,CRYGEP,CT45A1…	R-HSA-166663	Initial triggering of complement	4.17125e-06
OV	,ACTRT2,ADARB2-AS1,ADH1B,ADIPOQ,AFAP1-AS1,AKR1B10,ALDH1L1-AS2,ALKAL2,ALPI,AMBN,AMY1B,ANKRD30BP1,ANKRD66,AQP4-AS1,ARHGAP27P2,AWAT1,BAGE2,BARX1-DT,BCO1,BEND4,BLK,BMP15,BNIP3P34,BNIP3P9,C10orf62,C10orf71,C17orf77,C1orf194,C1orf87,C20orf85,C5orf52,C6orf15,C8orf49,CALML5,CALR3,CCDC190,CCKAR,CCL15,CCNQP1,CDC20B,CFAP65,CGB1,CGB5,CHRNB2,CHRND,CLEC2A,CLEC2L,CLEC6A,CNN2P3,CNN2P8,COL2A1,CROCC2,CRYGEP,CT45A1…	R-HSA-2871809	FCERI mediated Ca+2 mobilization	5.65527e-06
OV	,ACTRT2,ADARB2-AS1,ADH1B,ADIPOQ,AFAP1-AS1,AKR1B10,ALDH1L1-AS2,ALKAL2,ALPI,AMBN,AMY1B,ANKRD30BP1,ANKRD66,AQP4-AS1,ARHGAP27P2,AWAT1,BAGE2,BARX1-DT,BCO1,BEND4,BLK,BMP15,BNIP3P34,BNIP3P9,C10orf62,C10orf71,C17orf77,C1orf194,C1orf87,C20orf85,C5orf52,C6orf15,C8orf49,CALML5,CALR3,CCDC190,CCKAR,CCL15,CCNQP1,CDC20B,CFAP65,CGB1,CGB5,CHRNB2,CHRND,CLEC2A,CLEC2L,CLEC6A,CNN2P3,CNN2P8,COL2A1,CROCC2,CRYGEP,CT45A1…	R-HSA-2029485	Role of phospholipids in phagocytosis	5.65527e-06
OV	,ACTRT2,ADARB2-AS1,ADH1B,ADIPOQ,AFAP1-AS1,AKR1B10,ALDH1L1-AS2,ALKAL2,ALPI,AMBN,AMY1B,ANKRD30BP1,ANKRD66,AQP4-AS1,ARHGAP27P2,AWAT1,BAGE2,BARX1-DT,BCO1,BEND4,BLK,BMP15,BNIP3P34,BNIP3P9,C10orf62,C10orf71,C17orf77,C1orf194,C1orf87,C20orf85,C5orf52,C6orf15,C8orf49,CALML5,CALR3,CCDC190,CCKAR,CCL15,CCNQP1,CDC20B,CFAP65,CGB1,CGB5,CHRNB2,CHRND,CLEC2A,CLEC2L,CLEC6A,CNN2P3,CNN2P8,COL2A1,CROCC2,CRYGEP,CT45A1…	R-HSA-2871796	FCERI mediated MAPK activation	6.09077e-06
OV	,ACTRT2,ADARB2-AS1,ADH1B,ADIPOQ,AFAP1-AS1,AKR1B10,ALDH1L1-AS2,ALKAL2,ALPI,AMBN,AMY1B,ANKRD30BP1,ANKRD66,AQP4-AS1,ARHGAP27P2,AWAT1,BAGE2,BARX1-DT,BCO1,BEND4,BLK,BMP15,BNIP3P34,BNIP3P9,C10orf62,C10orf71,C17orf77,C1orf194,C1orf87,C20orf85,C5orf52,C6orf15,C8orf49,CALML5,CALR3,CCDC190,CCKAR,CCL15,CCNQP1,CDC20B,CFAP65,CGB1,CGB5,CHRNB2,CHRND,CLEC2A,CLEC2L,CLEC6A,CNN2P3,CNN2P8,COL2A1,CROCC2,CRYGEP,CT45A1…	R-HSA-202733	Cell surface interactions at the vascular wall	1.16649e-05
OV	,ACTRT2,ADARB2-AS1,ADH1B,ADIPOQ,AFAP1-AS1,AKR1B10,ALDH1L1-AS2,ALKAL2,ALPI,AMBN,AMY1B,ANKRD30BP1,ANKRD66,AQP4-AS1,ARHGAP27P2,AWAT1,BAGE2,BARX1-DT,BCO1,BEND4,BLK,BMP15,BNIP3P34,BNIP3P9,C10orf62,C10orf71,C17orf77,C1orf194,C1orf87,C20orf85,C5orf52,C6orf15,C8orf49,CALML5,CALR3,CCDC190,CCKAR,CCL15,CCNQP1,CDC20B,CFAP65,CGB1,CGB5,CHRNB2,CHRND,CLEC2A,CLEC2L,CLEC6A,CNN2P3,CNN2P8,COL2A1,CROCC2,CRYGEP,CT45A1…	R-HSA-983705	Signaling by the B Cell Receptor (BCR)	1.54275e-05
OV	,ACTRT2,ADARB2-AS1,ADH1B,ADIPOQ,AFAP1-AS1,AKR1B10,ALDH1L1-AS2,ALKAL2,ALPI,AMBN,AMY1B,ANKRD30BP1,ANKRD66,AQP4-AS1,ARHGAP27P2,AWAT1,BAGE2,BARX1-DT,BCO1,BEND4,BLK,BMP15,BNIP3P34,BNIP3P9,C10orf62,C10orf71,C17orf77,C1orf194,C1orf87,C20orf85,C5orf52,C6orf15,C8orf49,CALML5,CALR3,CCDC190,CCKAR,CCL15,CCNQP1,CDC20B,CFAP65,CGB1,CGB5,CHRNB2,CHRND,CLEC2A,CLEC2L,CLEC6A,CNN2P3,CNN2P8,COL2A1,CROCC2,CRYGEP,CT45A1…	R-HSA-2173782	Binding and Uptake of Ligands by Scavenger Receptors	1.60254e-05
OV	,ACTRT2,ADARB2-AS1,ADH1B,ADIPOQ,AFAP1-AS1,AKR1B10,ALDH1L1-AS2,ALKAL2,ALPI,AMBN,AMY1B,ANKRD30BP1,ANKRD66,AQP4-AS1,ARHGAP27P2,AWAT1,BAGE2,BARX1-DT,BCO1,BEND4,BLK,BMP15,BNIP3P34,BNIP3P9,C10orf62,C10orf71,C17orf77,C1orf194,C1orf87,C20orf85,C5orf52,C6orf15,C8orf49,CALML5,CALR3,CCDC190,CCKAR,CCL15,CCNQP1,CDC20B,CFAP65,CGB1,CGB5,CHRNB2,CHRND,CLEC2A,CLEC2L,CLEC6A,CNN2P3,CNN2P8,COL2A1,CROCC2,CRYGEP,CT45A1…	R-HSA-109582	Hemostasis	2.0959e-05
OV	,ACTRT2,ADARB2-AS1,ADH1B,ADIPOQ,AFAP1-AS1,AKR1B10,ALDH1L1-AS2,ALKAL2,ALPI,AMBN,AMY1B,ANKRD30BP1,ANKRD66,AQP4-AS1,ARHGAP27P2,AWAT1,BAGE2,BARX1-DT,BCO1,BEND4,BLK,BMP15,BNIP3P34,BNIP3P9,C10orf62,C10orf71,C17orf77,C1orf194,C1orf87,C20orf85,C5orf52,C6orf15,C8orf49,CALML5,CALR3,CCDC190,CCKAR,CCL15,CCNQP1,CDC20B,CFAP65,CGB1,CGB5,CHRNB2,CHRND,CLEC2A,CLEC2L,CLEC6A,CNN2P3,CNN2P8,COL2A1,CROCC2,CRYGEP,CT45A1…	R-HSA-2029482	Regulation of actin dynamics for phagocytic cup formation	5.57893e-05
OV	,ACTRT2,ADARB2-AS1,ADH1B,ADIPOQ,AFAP1-AS1,AKR1B10,ALDH1L1-AS2,ALKAL2,ALPI,AMBN,AMY1B,ANKRD30BP1,ANKRD66,AQP4-AS1,ARHGAP27P2,AWAT1,BAGE2,BARX1-DT,BCO1,BEND4,BLK,BMP15,BNIP3P34,BNIP3P9,C10orf62,C10orf71,C17orf77,C1orf194,C1orf87,C20orf85,C5orf52,C6orf15,C8orf49,CALML5,CALR3,CCDC190,CCKAR,CCL15,CCNQP1,CDC20B,CFAP65,CGB1,CGB5,CHRNB2,CHRND,CLEC2A,CLEC2L,CLEC6A,CNN2P3,CNN2P8,COL2A1,CROCC2,CRYGEP,CT45A1…	R-HSA-2871837	FCERI mediated NF-kB activation	0.00011536
OV	,ACTRT2,ADARB2-AS1,ADH1B,ADIPOQ,AFAP1-AS1,AKR1B10,ALDH1L1-AS2,ALKAL2,ALPI,AMBN,AMY1B,ANKRD30BP1,ANKRD66,AQP4-AS1,ARHGAP27P2,AWAT1,BAGE2,BARX1-DT,BCO1,BEND4,BLK,BMP15,BNIP3P34,BNIP3P9,C10orf62,C10orf71,C17orf77,C1orf194,C1orf87,C20orf85,C5orf52,C6orf15,C8orf49,CALML5,CALR3,CCDC190,CCKAR,CCL15,CCNQP1,CDC20B,CFAP65,CGB1,CGB5,CHRNB2,CHRND,CLEC2A,CLEC2L,CLEC6A,CNN2P3,CNN2P8,COL2A1,CROCC2,CRYGEP,CT45A1…	R-HSA-2029480	Fcgamma receptor (FCGR) dependent phagocytosis	0.000194686
OV	,ACTRT2,ADARB2-AS1,ADH1B,ADIPOQ,AFAP1-AS1,AKR1B10,ALDH1L1-AS2,ALKAL2,ALPI,AMBN,AMY1B,ANKRD30BP1,ANKRD66,AQP4-AS1,ARHGAP27P2,AWAT1,BAGE2,BARX1-DT,BCO1,BEND4,BLK,BMP15,BNIP3P34,BNIP3P9,C10orf62,C10orf71,C17orf77,C1orf194,C1orf87,C20orf85,C5orf52,C6orf15,C8orf49,CALML5,CALR3,CCDC190,CCKAR,CCL15,CCNQP1,CDC20B,CFAP65,CGB1,CGB5,CHRNB2,CHRND,CLEC2A,CLEC2L,CLEC6A,CNN2P3,CNN2P8,COL2A1,CROCC2,CRYGEP,CT45A1…	R-HSA-1266738	Developmental Biology	0.000196425
OV	,ACTRT2,ADARB2-AS1,ADH1B,ADIPOQ,AFAP1-AS1,AKR1B10,ALDH1L1-AS2,ALKAL2,ALPI,AMBN,AMY1B,ANKRD30BP1,ANKRD66,AQP4-AS1,ARHGAP27P2,AWAT1,BAGE2,BARX1-DT,BCO1,BEND4,BLK,BMP15,BNIP3P34,BNIP3P9,C10orf62,C10orf71,C17orf77,C1orf194,C1orf87,C20orf85,C5orf52,C6orf15,C8orf49,CALML5,CALR3,CCDC190,CCKAR,CCL15,CCNQP1,CDC20B,CFAP65,CGB1,CGB5,CHRNB2,CHRND,CLEC2A,CLEC2L,CLEC6A,CNN2P3,CNN2P8,COL2A1,CROCC2,CRYGEP,CT45A1…	R-HSA-2454202	Fc epsilon receptor (FCERI) signaling	0.00106906
OV	,ACTRT2,ADARB2-AS1,ADH1B,ADIPOQ,AFAP1-AS1,AKR1B10,ALDH1L1-AS2,ALKAL2,ALPI,AMBN,AMY1B,ANKRD30BP1,ANKRD66,AQP4-AS1,ARHGAP27P2,AWAT1,BAGE2,BARX1-DT,BCO1,BEND4,BLK,BMP15,BNIP3P34,BNIP3P9,C10orf62,C10orf71,C17orf77,C1orf194,C1orf87,C20orf85,C5orf52,C6orf15,C8orf49,CALML5,CALR3,CCDC190,CCKAR,CCL15,CCNQP1,CDC20B,CFAP65,CGB1,CGB5,CHRNB2,CHRND,CLEC2A,CLEC2L,CLEC6A,CNN2P3,CNN2P8,COL2A1,CROCC2,CRYGEP,CT45A1…	R-HSA-198933	Immunoregulatory interactions between a Lymphoid and a non-Lymphoid cell	0.00136909
OV	,ACTRT2,ADARB2-AS1,ADH1B,ADIPOQ,AFAP1-AS1,AKR1B10,ALDH1L1-AS2,ALKAL2,ALPI,AMBN,AMY1B,ANKRD30BP1,ANKRD66,AQP4-AS1,ARHGAP27P2,AWAT1,BAGE2,BARX1-DT,BCO1,BEND4,BLK,BMP15,BNIP3P34,BNIP3P9,C10orf62,C10orf71,C17orf77,C1orf194,C1orf87,C20orf85,C5orf52,C6orf15,C8orf49,CALML5,CALR3,CCDC190,CCKAR,CCL15,CCNQP1,CDC20B,CFAP65,CGB1,CGB5,CHRNB2,CHRND,CLEC2A,CLEC2L,CLEC6A,CNN2P3,CNN2P8,COL2A1,CROCC2,CRYGEP,CT45A1…	R-HSA-168249	Innate Immune System	0.00265546
OV	,ACTRT2,ADARB2-AS1,ADH1B,ADIPOQ,AFAP1-AS1,AKR1B10,ALDH1L1-AS2,ALKAL2,ALPI,AMBN,AMY1B,ANKRD30BP1,ANKRD66,AQP4-AS1,ARHGAP27P2,AWAT1,BAGE2,BARX1-DT,BCO1,BEND4,BLK,BMP15,BNIP3P34,BNIP3P9,C10orf62,C10orf71,C17orf77,C1orf194,C1orf87,C20orf85,C5orf52,C6orf15,C8orf49,CALML5,CALR3,CCDC190,CCKAR,CCL15,CCNQP1,CDC20B,CFAP65,CGB1,CGB5,CHRNB2,CHRND,CLEC2A,CLEC2L,CLEC6A,CNN2P3,CNN2P8,COL2A1,CROCC2,CRYGEP,CT45A1…	R-HSA-168256	Immune System	0.0258501
OV	,ACTRT2,ADARB2-AS1,ADH1B,ADIPOQ,AFAP1-AS1,AKR1B10,ALDH1L1-AS2,ALKAL2,ALPI,AMBN,AMY1B,ANKRD30BP1,ANKRD66,AQP4-AS1,ARHGAP27P2,AWAT1,BAGE2,BARX1-DT,BCO1,BEND4,BLK,BMP15,BNIP3P34,BNIP3P9,C10orf62,C10orf71,C17orf77,C1orf194,C1orf87,C20orf85,C5orf52,C6orf15,C8orf49,CALML5,CALR3,CCDC190,CCKAR,CCL15,CCNQP1,CDC20B,CFAP65,CGB1,CGB5,CHRNB2,CHRND,CLEC2A,CLEC2L,CLEC6A,CNN2P3,CNN2P8,COL2A1,CROCC2,CRYGEP,CT45A1…	R-HSA-975634	Retinoid metabolism and transport	0.028539
OV	,ACTRT2,ADARB2-AS1,ADH1B,ADIPOQ,AFAP1-AS1,AKR1B10,ALDH1L1-AS2,ALKAL2,ALPI,AMBN,AMY1B,ANKRD30BP1,ANKRD66,AQP4-AS1,ARHGAP27P2,AWAT1,BAGE2,BARX1-DT,BCO1,BEND4,BLK,BMP15,BNIP3P34,BNIP3P9,C10orf62,C10orf71,C17orf77,C1orf194,C1orf87,C20orf85,C5orf52,C6orf15,C8orf49,CALML5,CALR3,CCDC190,CCKAR,CCL15,CCNQP1,CDC20B,CFAP65,CGB1,CGB5,CHRNB2,CHRND,CLEC2A,CLEC2L,CLEC6A,CNN2P3,CNN2P8,COL2A1,CROCC2,CRYGEP,CT45A1…	R-HSA-6806667	Metabolism of fat-soluble vitamins	0.0404961
PAAD	ACOXL,ACTG2,ADAMDEC1,ADGRA1,ADGRG2,ADORA2B,AGXT,AKR1C4,ALPI,ALPK2,AMER2,APLN,APOBEC4,ARHGAP19-SLIT1,ARHGAP36,ARHGEF26-AS1,ARMC3,AS3MT,ASIC4,ATP1A3,B3GAT1,BRINP1,BRSK1,BTBD16,BTBD6P1,C1orf158,C1orf194,C1orf87,C1QL1,C1QL2,C1QL4,C1QTNF1-AS1,C4orf47,C5orf46,CA10,CALHM1,CAMKV,CAMP,CCL21,CCN6,CCNYL2,CDH4,CDX1,CELA2A,CELA2B,CES5AP1,CFAP47,CFAP52,CFAP77,CHIT1,CHRNA2,CHRNA9,CIDEA,CISTR,CLPS,CMTM5,CNN1,CNR…	R-HSA-162582	Signal Transduction	9.03586e-12
PAAD	ACOXL,ACTG2,ADAMDEC1,ADGRA1,ADGRG2,ADORA2B,AGXT,AKR1C4,ALPI,ALPK2,AMER2,APLN,APOBEC4,ARHGAP19-SLIT1,ARHGAP36,ARHGEF26-AS1,ARMC3,AS3MT,ASIC4,ATP1A3,B3GAT1,BRINP1,BRSK1,BTBD16,BTBD6P1,C1orf158,C1orf194,C1orf87,C1QL1,C1QL2,C1QL4,C1QTNF1-AS1,C4orf47,C5orf46,CA10,CALHM1,CAMKV,CAMP,CCL21,CCN6,CCNYL2,CDH4,CDX1,CELA2A,CELA2B,CES5AP1,CFAP47,CFAP52,CFAP77,CHIT1,CHRNA2,CHRNA9,CIDEA,CISTR,CLPS,CMTM5,CNN1,CNR…	R-HSA-112316	Neuronal System	1.11432e-10
PAAD	ACOXL,ACTG2,ADAMDEC1,ADGRA1,ADGRG2,ADORA2B,AGXT,AKR1C4,ALPI,ALPK2,AMER2,APLN,APOBEC4,ARHGAP19-SLIT1,ARHGAP36,ARHGEF26-AS1,ARMC3,AS3MT,ASIC4,ATP1A3,B3GAT1,BRINP1,BRSK1,BTBD16,BTBD6P1,C1orf158,C1orf194,C1orf87,C1QL1,C1QL2,C1QL4,C1QTNF1-AS1,C4orf47,C5orf46,CA10,CALHM1,CAMKV,CAMP,CCL21,CCN6,CCNYL2,CDH4,CDX1,CELA2A,CELA2B,CES5AP1,CFAP47,CFAP52,CFAP77,CHIT1,CHRNA2,CHRNA9,CIDEA,CISTR,CLPS,CMTM5,CNN1,CNR…	R-HSA-168256	Immune System	6.27203e-10
PAAD	ACOXL,ACTG2,ADAMDEC1,ADGRA1,ADGRG2,ADORA2B,AGXT,AKR1C4,ALPI,ALPK2,AMER2,APLN,APOBEC4,ARHGAP19-SLIT1,ARHGAP36,ARHGEF26-AS1,ARMC3,AS3MT,ASIC4,ATP1A3,B3GAT1,BRINP1,BRSK1,BTBD16,BTBD6P1,C1orf158,C1orf194,C1orf87,C1QL1,C1QL2,C1QL4,C1QTNF1-AS1,C4orf47,C5orf46,CA10,CALHM1,CAMKV,CAMP,CCL21,CCN6,CCNYL2,CDH4,CDX1,CELA2A,CELA2B,CES5AP1,CFAP47,CFAP52,CFAP77,CHIT1,CHRNA2,CHRNA9,CIDEA,CISTR,CLPS,CMTM5,CNN1,CNR…	R-HSA-500792	GPCR ligand binding	1.99331e-08
PAAD	ACOXL,ACTG2,ADAMDEC1,ADGRA1,ADGRG2,ADORA2B,AGXT,AKR1C4,ALPI,ALPK2,AMER2,APLN,APOBEC4,ARHGAP19-SLIT1,ARHGAP36,ARHGEF26-AS1,ARMC3,AS3MT,ASIC4,ATP1A3,B3GAT1,BRINP1,BRSK1,BTBD16,BTBD6P1,C1orf158,C1orf194,C1orf87,C1QL1,C1QL2,C1QL4,C1QTNF1-AS1,C4orf47,C5orf46,CA10,CALHM1,CAMKV,CAMP,CCL21,CCN6,CCNYL2,CDH4,CDX1,CELA2A,CELA2B,CES5AP1,CFAP47,CFAP52,CFAP77,CHIT1,CHRNA2,CHRNA9,CIDEA,CISTR,CLPS,CMTM5,CNN1,CNR…	R-HSA-1430728	Metabolism	6.07266e-07
PAAD	ACOXL,ACTG2,ADAMDEC1,ADGRA1,ADGRG2,ADORA2B,AGXT,AKR1C4,ALPI,ALPK2,AMER2,APLN,APOBEC4,ARHGAP19-SLIT1,ARHGAP36,ARHGEF26-AS1,ARMC3,AS3MT,ASIC4,ATP1A3,B3GAT1,BRINP1,BRSK1,BTBD16,BTBD6P1,C1orf158,C1orf194,C1orf87,C1QL1,C1QL2,C1QL4,C1QTNF1-AS1,C4orf47,C5orf46,CA10,CALHM1,CAMKV,CAMP,CCL21,CCN6,CCNYL2,CDH4,CDX1,CELA2A,CELA2B,CES5AP1,CFAP47,CFAP52,CFAP77,CHIT1,CHRNA2,CHRNA9,CIDEA,CISTR,CLPS,CMTM5,CNN1,CNR…	R-HSA-372790	Signaling by GPCR	6.60971e-07
PAAD	ACOXL,ACTG2,ADAMDEC1,ADGRA1,ADGRG2,ADORA2B,AGXT,AKR1C4,ALPI,ALPK2,AMER2,APLN,APOBEC4,ARHGAP19-SLIT1,ARHGAP36,ARHGEF26-AS1,ARMC3,AS3MT,ASIC4,ATP1A3,B3GAT1,BRINP1,BRSK1,BTBD16,BTBD6P1,C1orf158,C1orf194,C1orf87,C1QL1,C1QL2,C1QL4,C1QTNF1-AS1,C4orf47,C5orf46,CA10,CALHM1,CAMKV,CAMP,CCL21,CCN6,CCNYL2,CDH4,CDX1,CELA2A,CELA2B,CES5AP1,CFAP47,CFAP52,CFAP77,CHIT1,CHRNA2,CHRNA9,CIDEA,CISTR,CLPS,CMTM5,CNN1,CNR…	R-HSA-168249	Innate Immune System	6.91882e-06
PAAD	ACOXL,ACTG2,ADAMDEC1,ADGRA1,ADGRG2,ADORA2B,AGXT,AKR1C4,ALPI,ALPK2,AMER2,APLN,APOBEC4,ARHGAP19-SLIT1,ARHGAP36,ARHGEF26-AS1,ARMC3,AS3MT,ASIC4,ATP1A3,B3GAT1,BRINP1,BRSK1,BTBD16,BTBD6P1,C1orf158,C1orf194,C1orf87,C1QL1,C1QL2,C1QL4,C1QTNF1-AS1,C4orf47,C5orf46,CA10,CALHM1,CAMKV,CAMP,CCL21,CCN6,CCNYL2,CDH4,CDX1,CELA2A,CELA2B,CES5AP1,CFAP47,CFAP52,CFAP77,CHIT1,CHRNA2,CHRNA9,CIDEA,CISTR,CLPS,CMTM5,CNN1,CNR…	R-HSA-388396	GPCR downstream signalling	7.89006e-06
PAAD	ACOXL,ACTG2,ADAMDEC1,ADGRA1,ADGRG2,ADORA2B,AGXT,AKR1C4,ALPI,ALPK2,AMER2,APLN,APOBEC4,ARHGAP19-SLIT1,ARHGAP36,ARHGEF26-AS1,ARMC3,AS3MT,ASIC4,ATP1A3,B3GAT1,BRINP1,BRSK1,BTBD16,BTBD6P1,C1orf158,C1orf194,C1orf87,C1QL1,C1QL2,C1QL4,C1QTNF1-AS1,C4orf47,C5orf46,CA10,CALHM1,CAMKV,CAMP,CCL21,CCN6,CCNYL2,CDH4,CDX1,CELA2A,CELA2B,CES5AP1,CFAP47,CFAP52,CFAP77,CHIT1,CHRNA2,CHRNA9,CIDEA,CISTR,CLPS,CMTM5,CNN1,CNR…	R-HSA-2029485	Role of phospholipids in phagocytosis	8.14982e-06
PAAD	ACOXL,ACTG2,ADAMDEC1,ADGRA1,ADGRG2,ADORA2B,AGXT,AKR1C4,ALPI,ALPK2,AMER2,APLN,APOBEC4,ARHGAP19-SLIT1,ARHGAP36,ARHGEF26-AS1,ARMC3,AS3MT,ASIC4,ATP1A3,B3GAT1,BRINP1,BRSK1,BTBD16,BTBD6P1,C1orf158,C1orf194,C1orf87,C1QL1,C1QL2,C1QL4,C1QTNF1-AS1,C4orf47,C5orf46,CA10,CALHM1,CAMKV,CAMP,CCL21,CCN6,CCNYL2,CDH4,CDX1,CELA2A,CELA2B,CES5AP1,CFAP47,CFAP52,CFAP77,CHIT1,CHRNA2,CHRNA9,CIDEA,CISTR,CLPS,CMTM5,CNN1,CNR…	R-HSA-5690714	CD22 mediated BCR regulation	1.01479e-05
PAAD	ACOXL,ACTG2,ADAMDEC1,ADGRA1,ADGRG2,ADORA2B,AGXT,AKR1C4,ALPI,ALPK2,AMER2,APLN,APOBEC4,ARHGAP19-SLIT1,ARHGAP36,ARHGEF26-AS1,ARMC3,AS3MT,ASIC4,ATP1A3,B3GAT1,BRINP1,BRSK1,BTBD16,BTBD6P1,C1orf158,C1orf194,C1orf87,C1QL1,C1QL2,C1QL4,C1QTNF1-AS1,C4orf47,C5orf46,CA10,CALHM1,CAMKV,CAMP,CCL21,CCN6,CCNYL2,CDH4,CDX1,CELA2A,CELA2B,CES5AP1,CFAP47,CFAP52,CFAP77,CHIT1,CHRNA2,CHRNA9,CIDEA,CISTR,CLPS,CMTM5,CNN1,CNR…	R-HSA-977606	Regulation of Complement cascade	3.16185e-05
PAAD	ACOXL,ACTG2,ADAMDEC1,ADGRA1,ADGRG2,ADORA2B,AGXT,AKR1C4,ALPI,ALPK2,AMER2,APLN,APOBEC4,ARHGAP19-SLIT1,ARHGAP36,ARHGEF26-AS1,ARMC3,AS3MT,ASIC4,ATP1A3,B3GAT1,BRINP1,BRSK1,BTBD16,BTBD6P1,C1orf158,C1orf194,C1orf87,C1QL1,C1QL2,C1QL4,C1QTNF1-AS1,C4orf47,C5orf46,CA10,CALHM1,CAMKV,CAMP,CCL21,CCN6,CCNYL2,CDH4,CDX1,CELA2A,CELA2B,CES5AP1,CFAP47,CFAP52,CFAP77,CHIT1,CHRNA2,CHRNA9,CIDEA,CISTR,CLPS,CMTM5,CNN1,CNR…	R-HSA-173623	Classical antibody-mediated complement activation	5.10313e-05
PAAD	ACOXL,ACTG2,ADAMDEC1,ADGRA1,ADGRG2,ADORA2B,AGXT,AKR1C4,ALPI,ALPK2,AMER2,APLN,APOBEC4,ARHGAP19-SLIT1,ARHGAP36,ARHGEF26-AS1,ARMC3,AS3MT,ASIC4,ATP1A3,B3GAT1,BRINP1,BRSK1,BTBD16,BTBD6P1,C1orf158,C1orf194,C1orf87,C1QL1,C1QL2,C1QL4,C1QTNF1-AS1,C4orf47,C5orf46,CA10,CALHM1,CAMKV,CAMP,CCL21,CCN6,CCNYL2,CDH4,CDX1,CELA2A,CELA2B,CES5AP1,CFAP47,CFAP52,CFAP77,CHIT1,CHRNA2,CHRNA9,CIDEA,CISTR,CLPS,CMTM5,CNN1,CNR…	R-HSA-373076	Class A/1 (Rhodopsin-like receptors)	5.29226e-05
PAAD	ACOXL,ACTG2,ADAMDEC1,ADGRA1,ADGRG2,ADORA2B,AGXT,AKR1C4,ALPI,ALPK2,AMER2,APLN,APOBEC4,ARHGAP19-SLIT1,ARHGAP36,ARHGEF26-AS1,ARMC3,AS3MT,ASIC4,ATP1A3,B3GAT1,BRINP1,BRSK1,BTBD16,BTBD6P1,C1orf158,C1orf194,C1orf87,C1QL1,C1QL2,C1QL4,C1QTNF1-AS1,C4orf47,C5orf46,CA10,CALHM1,CAMKV,CAMP,CCL21,CCN6,CCNYL2,CDH4,CDX1,CELA2A,CELA2B,CES5AP1,CFAP47,CFAP52,CFAP77,CHIT1,CHRNA2,CHRNA9,CIDEA,CISTR,CLPS,CMTM5,CNN1,CNR…	R-HSA-166658	Complement cascade	6.06156e-05
PAAD	ACOXL,ACTG2,ADAMDEC1,ADGRA1,ADGRG2,ADORA2B,AGXT,AKR1C4,ALPI,ALPK2,AMER2,APLN,APOBEC4,ARHGAP19-SLIT1,ARHGAP36,ARHGEF26-AS1,ARMC3,AS3MT,ASIC4,ATP1A3,B3GAT1,BRINP1,BRSK1,BTBD16,BTBD6P1,C1orf158,C1orf194,C1orf87,C1QL1,C1QL2,C1QL4,C1QTNF1-AS1,C4orf47,C5orf46,CA10,CALHM1,CAMKV,CAMP,CCL21,CCN6,CCNYL2,CDH4,CDX1,CELA2A,CELA2B,CES5AP1,CFAP47,CFAP52,CFAP77,CHIT1,CHRNA2,CHRNA9,CIDEA,CISTR,CLPS,CMTM5,CNN1,CNR…	R-HSA-2730905	Role of LAT2/NTAL/LAB on calcium mobilization	6.96176e-05
PAAD	ACOXL,ACTG2,ADAMDEC1,ADGRA1,ADGRG2,ADORA2B,AGXT,AKR1C4,ALPI,ALPK2,AMER2,APLN,APOBEC4,ARHGAP19-SLIT1,ARHGAP36,ARHGEF26-AS1,ARMC3,AS3MT,ASIC4,ATP1A3,B3GAT1,BRINP1,BRSK1,BTBD16,BTBD6P1,C1orf158,C1orf194,C1orf87,C1QL1,C1QL2,C1QL4,C1QTNF1-AS1,C4orf47,C5orf46,CA10,CALHM1,CAMKV,CAMP,CCL21,CCN6,CCNYL2,CDH4,CDX1,CELA2A,CELA2B,CES5AP1,CFAP47,CFAP52,CFAP77,CHIT1,CHRNA2,CHRNA9,CIDEA,CISTR,CLPS,CMTM5,CNN1,CNR…	R-HSA-2168880	Scavenging of heme from plasma	6.96176e-05
PAAD	ACOXL,ACTG2,ADAMDEC1,ADGRA1,ADGRG2,ADORA2B,AGXT,AKR1C4,ALPI,ALPK2,AMER2,APLN,APOBEC4,ARHGAP19-SLIT1,ARHGAP36,ARHGEF26-AS1,ARMC3,AS3MT,ASIC4,ATP1A3,B3GAT1,BRINP1,BRSK1,BTBD16,BTBD6P1,C1orf158,C1orf194,C1orf87,C1QL1,C1QL2,C1QL4,C1QTNF1-AS1,C4orf47,C5orf46,CA10,CALHM1,CAMKV,CAMP,CCL21,CCN6,CCNYL2,CDH4,CDX1,CELA2A,CELA2B,CES5AP1,CFAP47,CFAP52,CFAP77,CHIT1,CHRNA2,CHRNA9,CIDEA,CISTR,CLPS,CMTM5,CNN1,CNR…	R-HSA-2029481	FCGR activation	8.08756e-05
PAAD	ACOXL,ACTG2,ADAMDEC1,ADGRA1,ADGRG2,ADORA2B,AGXT,AKR1C4,ALPI,ALPK2,AMER2,APLN,APOBEC4,ARHGAP19-SLIT1,ARHGAP36,ARHGEF26-AS1,ARMC3,AS3MT,ASIC4,ATP1A3,B3GAT1,BRINP1,BRSK1,BTBD16,BTBD6P1,C1orf158,C1orf194,C1orf87,C1QL1,C1QL2,C1QL4,C1QTNF1-AS1,C4orf47,C5orf46,CA10,CALHM1,CAMKV,CAMP,CCL21,CCN6,CCNYL2,CDH4,CDX1,CELA2A,CELA2B,CES5AP1,CFAP47,CFAP52,CFAP77,CHIT1,CHRNA2,CHRNA9,CIDEA,CISTR,CLPS,CMTM5,CNN1,CNR…	R-HSA-983695	Antigen activates B Cell Receptor (BCR) leading to generation of second messengers	8.70586e-05
PAAD	ACOXL,ACTG2,ADAMDEC1,ADGRA1,ADGRG2,ADORA2B,AGXT,AKR1C4,ALPI,ALPK2,AMER2,APLN,APOBEC4,ARHGAP19-SLIT1,ARHGAP36,ARHGEF26-AS1,ARMC3,AS3MT,ASIC4,ATP1A3,B3GAT1,BRINP1,BRSK1,BTBD16,BTBD6P1,C1orf158,C1orf194,C1orf87,C1QL1,C1QL2,C1QL4,C1QTNF1-AS1,C4orf47,C5orf46,CA10,CALHM1,CAMKV,CAMP,CCL21,CCN6,CCNYL2,CDH4,CDX1,CELA2A,CELA2B,CES5AP1,CFAP47,CFAP52,CFAP77,CHIT1,CHRNA2,CHRNA9,CIDEA,CISTR,CLPS,CMTM5,CNN1,CNR…	R-HSA-166786	Creation of C4 and C2 activators	9.36366e-05
PAAD	ACOXL,ACTG2,ADAMDEC1,ADGRA1,ADGRG2,ADORA2B,AGXT,AKR1C4,ALPI,ALPK2,AMER2,APLN,APOBEC4,ARHGAP19-SLIT1,ARHGAP36,ARHGEF26-AS1,ARMC3,AS3MT,ASIC4,ATP1A3,B3GAT1,BRINP1,BRSK1,BTBD16,BTBD6P1,C1orf158,C1orf194,C1orf87,C1QL1,C1QL2,C1QL4,C1QTNF1-AS1,C4orf47,C5orf46,CA10,CALHM1,CAMKV,CAMP,CCL21,CCN6,CCNYL2,CDH4,CDX1,CELA2A,CELA2B,CES5AP1,CFAP47,CFAP52,CFAP77,CHIT1,CHRNA2,CHRNA9,CIDEA,CISTR,CLPS,CMTM5,CNN1,CNR…	R-HSA-1296071	Potassium Channels	0.000115949
PAAD	ACOXL,ACTG2,ADAMDEC1,ADGRA1,ADGRG2,ADORA2B,AGXT,AKR1C4,ALPI,ALPK2,AMER2,APLN,APOBEC4,ARHGAP19-SLIT1,ARHGAP36,ARHGEF26-AS1,ARMC3,AS3MT,ASIC4,ATP1A3,B3GAT1,BRINP1,BRSK1,BTBD16,BTBD6P1,C1orf158,C1orf194,C1orf87,C1QL1,C1QL2,C1QL4,C1QTNF1-AS1,C4orf47,C5orf46,CA10,CALHM1,CAMKV,CAMP,CCL21,CCN6,CCNYL2,CDH4,CDX1,CELA2A,CELA2B,CES5AP1,CFAP47,CFAP52,CFAP77,CHIT1,CHRNA2,CHRNA9,CIDEA,CISTR,CLPS,CMTM5,CNN1,CNR…	R-HSA-166663	Initial triggering of complement	0.000152557
PAAD	ACOXL,ACTG2,ADAMDEC1,ADGRA1,ADGRG2,ADORA2B,AGXT,AKR1C4,ALPI,ALPK2,AMER2,APLN,APOBEC4,ARHGAP19-SLIT1,ARHGAP36,ARHGEF26-AS1,ARMC3,AS3MT,ASIC4,ATP1A3,B3GAT1,BRINP1,BRSK1,BTBD16,BTBD6P1,C1orf158,C1orf194,C1orf87,C1QL1,C1QL2,C1QL4,C1QTNF1-AS1,C4orf47,C5orf46,CA10,CALHM1,CAMKV,CAMP,CCL21,CCN6,CCNYL2,CDH4,CDX1,CELA2A,CELA2B,CES5AP1,CFAP47,CFAP52,CFAP77,CHIT1,CHRNA2,CHRNA9,CIDEA,CISTR,CLPS,CMTM5,CNN1,CNR…	R-HSA-211859	Biological oxidations	0.000172367
PAAD	ACOXL,ACTG2,ADAMDEC1,ADGRA1,ADGRG2,ADORA2B,AGXT,AKR1C4,ALPI,ALPK2,AMER2,APLN,APOBEC4,ARHGAP19-SLIT1,ARHGAP36,ARHGEF26-AS1,ARMC3,AS3MT,ASIC4,ATP1A3,B3GAT1,BRINP1,BRSK1,BTBD16,BTBD6P1,C1orf158,C1orf194,C1orf87,C1QL1,C1QL2,C1QL4,C1QTNF1-AS1,C4orf47,C5orf46,CA10,CALHM1,CAMKV,CAMP,CCL21,CCN6,CCNYL2,CDH4,CDX1,CELA2A,CELA2B,CES5AP1,CFAP47,CFAP52,CFAP77,CHIT1,CHRNA2,CHRNA9,CIDEA,CISTR,CLPS,CMTM5,CNN1,CNR…	R-HSA-2871809	FCERI mediated Ca+2 mobilization	0.000198484
PAAD	ACOXL,ACTG2,ADAMDEC1,ADGRA1,ADGRG2,ADORA2B,AGXT,AKR1C4,ALPI,ALPK2,AMER2,APLN,APOBEC4,ARHGAP19-SLIT1,ARHGAP36,ARHGEF26-AS1,ARMC3,AS3MT,ASIC4,ATP1A3,B3GAT1,BRINP1,BRSK1,BTBD16,BTBD6P1,C1orf158,C1orf194,C1orf87,C1QL1,C1QL2,C1QL4,C1QTNF1-AS1,C4orf47,C5orf46,CA10,CALHM1,CAMKV,CAMP,CCL21,CCN6,CCNYL2,CDH4,CDX1,CELA2A,CELA2B,CES5AP1,CFAP47,CFAP52,CFAP77,CHIT1,CHRNA2,CHRNA9,CIDEA,CISTR,CLPS,CMTM5,CNN1,CNR…	R-HSA-2871796	FCERI mediated MAPK activation	0.000211632
PAAD	ACOXL,ACTG2,ADAMDEC1,ADGRA1,ADGRG2,ADORA2B,AGXT,AKR1C4,ALPI,ALPK2,AMER2,APLN,APOBEC4,ARHGAP19-SLIT1,ARHGAP36,ARHGEF26-AS1,ARMC3,AS3MT,ASIC4,ATP1A3,B3GAT1,BRINP1,BRSK1,BTBD16,BTBD6P1,C1orf158,C1orf194,C1orf87,C1QL1,C1QL2,C1QL4,C1QTNF1-AS1,C4orf47,C5orf46,CA10,CALHM1,CAMKV,CAMP,CCL21,CCN6,CCNYL2,CDH4,CDX1,CELA2A,CELA2B,CES5AP1,CFAP47,CFAP52,CFAP77,CHIT1,CHRNA2,CHRNA9,CIDEA,CISTR,CLPS,CMTM5,CNN1,CNR…	R-HSA-202733	Cell surface interactions at the vascular wall	0.000251094
PAAD	ACOXL,ACTG2,ADAMDEC1,ADGRA1,ADGRG2,ADORA2B,AGXT,AKR1C4,ALPI,ALPK2,AMER2,APLN,APOBEC4,ARHGAP19-SLIT1,ARHGAP36,ARHGEF26-AS1,ARMC3,AS3MT,ASIC4,ATP1A3,B3GAT1,BRINP1,BRSK1,BTBD16,BTBD6P1,C1orf158,C1orf194,C1orf87,C1QL1,C1QL2,C1QL4,C1QTNF1-AS1,C4orf47,C5orf46,CA10,CALHM1,CAMKV,CAMP,CCL21,CCN6,CCNYL2,CDH4,CDX1,CELA2A,CELA2B,CES5AP1,CFAP47,CFAP52,CFAP77,CHIT1,CHRNA2,CHRNA9,CIDEA,CISTR,CLPS,CMTM5,CNN1,CNR…	R-HSA-109582	Hemostasis	0.000270424
PAAD	ACOXL,ACTG2,ADAMDEC1,ADGRA1,ADGRG2,ADORA2B,AGXT,AKR1C4,ALPI,ALPK2,AMER2,APLN,APOBEC4,ARHGAP19-SLIT1,ARHGAP36,ARHGEF26-AS1,ARMC3,AS3MT,ASIC4,ATP1A3,B3GAT1,BRINP1,BRSK1,BTBD16,BTBD6P1,C1orf158,C1orf194,C1orf87,C1QL1,C1QL2,C1QL4,C1QTNF1-AS1,C4orf47,C5orf46,CA10,CALHM1,CAMKV,CAMP,CCL21,CCN6,CCNYL2,CDH4,CDX1,CELA2A,CELA2B,CES5AP1,CFAP47,CFAP52,CFAP77,CHIT1,CHRNA2,CHRNA9,CIDEA,CISTR,CLPS,CMTM5,CNN1,CNR…	R-HSA-2029480	Fcgamma receptor (FCGR) dependent phagocytosis	0.000278248
PAAD	ACOXL,ACTG2,ADAMDEC1,ADGRA1,ADGRG2,ADORA2B,AGXT,AKR1C4,ALPI,ALPK2,AMER2,APLN,APOBEC4,ARHGAP19-SLIT1,ARHGAP36,ARHGEF26-AS1,ARMC3,AS3MT,ASIC4,ATP1A3,B3GAT1,BRINP1,BRSK1,BTBD16,BTBD6P1,C1orf158,C1orf194,C1orf87,C1QL1,C1QL2,C1QL4,C1QTNF1-AS1,C4orf47,C5orf46,CA10,CALHM1,CAMKV,CAMP,CCL21,CCN6,CCNYL2,CDH4,CDX1,CELA2A,CELA2B,CES5AP1,CFAP47,CFAP52,CFAP77,CHIT1,CHRNA2,CHRNA9,CIDEA,CISTR,CLPS,CMTM5,CNN1,CNR…	R-HSA-5579029	Metabolic disorders of biological oxidation enzymes	0.000322221
PAAD	ACOXL,ACTG2,ADAMDEC1,ADGRA1,ADGRG2,ADORA2B,AGXT,AKR1C4,ALPI,ALPK2,AMER2,APLN,APOBEC4,ARHGAP19-SLIT1,ARHGAP36,ARHGEF26-AS1,ARMC3,AS3MT,ASIC4,ATP1A3,B3GAT1,BRINP1,BRSK1,BTBD16,BTBD6P1,C1orf158,C1orf194,C1orf87,C1QL1,C1QL2,C1QL4,C1QTNF1-AS1,C4orf47,C5orf46,CA10,CALHM1,CAMKV,CAMP,CCL21,CCN6,CCNYL2,CDH4,CDX1,CELA2A,CELA2B,CES5AP1,CFAP47,CFAP52,CFAP77,CHIT1,CHRNA2,CHRNA9,CIDEA,CISTR,CLPS,CMTM5,CNN1,CNR…	R-HSA-418594	G alpha (i) signalling events	0.00037001
PAAD	ACOXL,ACTG2,ADAMDEC1,ADGRA1,ADGRG2,ADORA2B,AGXT,AKR1C4,ALPI,ALPK2,AMER2,APLN,APOBEC4,ARHGAP19-SLIT1,ARHGAP36,ARHGEF26-AS1,ARMC3,AS3MT,ASIC4,ATP1A3,B3GAT1,BRINP1,BRSK1,BTBD16,BTBD6P1,C1orf158,C1orf194,C1orf87,C1QL1,C1QL2,C1QL4,C1QTNF1-AS1,C4orf47,C5orf46,CA10,CALHM1,CAMKV,CAMP,CCL21,CCN6,CCNYL2,CDH4,CDX1,CELA2A,CELA2B,CES5AP1,CFAP47,CFAP52,CFAP77,CHIT1,CHRNA2,CHRNA9,CIDEA,CISTR,CLPS,CMTM5,CNN1,CNR…	R-HSA-2173782	Binding and Uptake of Ligands by Scavenger Receptors	0.000488385
PAAD	ACOXL,ACTG2,ADAMDEC1,ADGRA1,ADGRG2,ADORA2B,AGXT,AKR1C4,ALPI,ALPK2,AMER2,APLN,APOBEC4,ARHGAP19-SLIT1,ARHGAP36,ARHGEF26-AS1,ARMC3,AS3MT,ASIC4,ATP1A3,B3GAT1,BRINP1,BRSK1,BTBD16,BTBD6P1,C1orf158,C1orf194,C1orf87,C1QL1,C1QL2,C1QL4,C1QTNF1-AS1,C4orf47,C5orf46,CA10,CALHM1,CAMKV,CAMP,CCL21,CCN6,CCNYL2,CDH4,CDX1,CELA2A,CELA2B,CES5AP1,CFAP47,CFAP52,CFAP77,CHIT1,CHRNA2,CHRNA9,CIDEA,CISTR,CLPS,CMTM5,CNN1,CNR…	R-HSA-112315	Transmission across Chemical Synapses	0.000523569
PAAD	ACOXL,ACTG2,ADAMDEC1,ADGRA1,ADGRG2,ADORA2B,AGXT,AKR1C4,ALPI,ALPK2,AMER2,APLN,APOBEC4,ARHGAP19-SLIT1,ARHGAP36,ARHGEF26-AS1,ARMC3,AS3MT,ASIC4,ATP1A3,B3GAT1,BRINP1,BRSK1,BTBD16,BTBD6P1,C1orf158,C1orf194,C1orf87,C1QL1,C1QL2,C1QL4,C1QTNF1-AS1,C4orf47,C5orf46,CA10,CALHM1,CAMKV,CAMP,CCL21,CCN6,CCNYL2,CDH4,CDX1,CELA2A,CELA2B,CES5AP1,CFAP47,CFAP52,CFAP77,CHIT1,CHRNA2,CHRNA9,CIDEA,CISTR,CLPS,CMTM5,CNN1,CNR…	R-HSA-112314	Neurotransmitter receptors and postsynaptic signal transmission	0.000606134
PAAD	ACOXL,ACTG2,ADAMDEC1,ADGRA1,ADGRG2,ADORA2B,AGXT,AKR1C4,ALPI,ALPK2,AMER2,APLN,APOBEC4,ARHGAP19-SLIT1,ARHGAP36,ARHGEF26-AS1,ARMC3,AS3MT,ASIC4,ATP1A3,B3GAT1,BRINP1,BRSK1,BTBD16,BTBD6P1,C1orf158,C1orf194,C1orf87,C1QL1,C1QL2,C1QL4,C1QTNF1-AS1,C4orf47,C5orf46,CA10,CALHM1,CAMKV,CAMP,CCL21,CCN6,CCNYL2,CDH4,CDX1,CELA2A,CELA2B,CES5AP1,CFAP47,CFAP52,CFAP77,CHIT1,CHRNA2,CHRNA9,CIDEA,CISTR,CLPS,CMTM5,CNN1,CNR…	R-HSA-1643685	Disease	0.00104166
PAAD	ACOXL,ACTG2,ADAMDEC1,ADGRA1,ADGRG2,ADORA2B,AGXT,AKR1C4,ALPI,ALPK2,AMER2,APLN,APOBEC4,ARHGAP19-SLIT1,ARHGAP36,ARHGEF26-AS1,ARMC3,AS3MT,ASIC4,ATP1A3,B3GAT1,BRINP1,BRSK1,BTBD16,BTBD6P1,C1orf158,C1orf194,C1orf87,C1QL1,C1QL2,C1QL4,C1QTNF1-AS1,C4orf47,C5orf46,CA10,CALHM1,CAMKV,CAMP,CCL21,CCN6,CCNYL2,CDH4,CDX1,CELA2A,CELA2B,CES5AP1,CFAP47,CFAP52,CFAP77,CHIT1,CHRNA2,CHRNA9,CIDEA,CISTR,CLPS,CMTM5,CNN1,CNR…	R-HSA-2029482	Regulation of actin dynamics for phagocytic cup formation	0.00143483
PAAD	ACOXL,ACTG2,ADAMDEC1,ADGRA1,ADGRG2,ADORA2B,AGXT,AKR1C4,ALPI,ALPK2,AMER2,APLN,APOBEC4,ARHGAP19-SLIT1,ARHGAP36,ARHGEF26-AS1,ARMC3,AS3MT,ASIC4,ATP1A3,B3GAT1,BRINP1,BRSK1,BTBD16,BTBD6P1,C1orf158,C1orf194,C1orf87,C1QL1,C1QL2,C1QL4,C1QTNF1-AS1,C4orf47,C5orf46,CA10,CALHM1,CAMKV,CAMP,CCL21,CCN6,CCNYL2,CDH4,CDX1,CELA2A,CELA2B,CES5AP1,CFAP47,CFAP52,CFAP77,CHIT1,CHRNA2,CHRNA9,CIDEA,CISTR,CLPS,CMTM5,CNN1,CNR…	R-HSA-198933	Immunoregulatory interactions between a Lymphoid and a non-Lymphoid cell	0.00194381
PAAD	ACOXL,ACTG2,ADAMDEC1,ADGRA1,ADGRG2,ADORA2B,AGXT,AKR1C4,ALPI,ALPK2,AMER2,APLN,APOBEC4,ARHGAP19-SLIT1,ARHGAP36,ARHGEF26-AS1,ARMC3,AS3MT,ASIC4,ATP1A3,B3GAT1,BRINP1,BRSK1,BTBD16,BTBD6P1,C1orf158,C1orf194,C1orf87,C1QL1,C1QL2,C1QL4,C1QTNF1-AS1,C4orf47,C5orf46,CA10,CALHM1,CAMKV,CAMP,CCL21,CCN6,CCNYL2,CDH4,CDX1,CELA2A,CELA2B,CES5AP1,CFAP47,CFAP52,CFAP77,CHIT1,CHRNA2,CHRNA9,CIDEA,CISTR,CLPS,CMTM5,CNN1,CNR…	R-HSA-5683057	MAPK family signaling cascades	0.00194672
PAAD	ACOXL,ACTG2,ADAMDEC1,ADGRA1,ADGRG2,ADORA2B,AGXT,AKR1C4,ALPI,ALPK2,AMER2,APLN,APOBEC4,ARHGAP19-SLIT1,ARHGAP36,ARHGEF26-AS1,ARMC3,AS3MT,ASIC4,ATP1A3,B3GAT1,BRINP1,BRSK1,BTBD16,BTBD6P1,C1orf158,C1orf194,C1orf87,C1QL1,C1QL2,C1QL4,C1QTNF1-AS1,C4orf47,C5orf46,CA10,CALHM1,CAMKV,CAMP,CCL21,CCN6,CCNYL2,CDH4,CDX1,CELA2A,CELA2B,CES5AP1,CFAP47,CFAP52,CFAP77,CHIT1,CHRNA2,CHRNA9,CIDEA,CISTR,CLPS,CMTM5,CNN1,CNR…	R-HSA-8935690	Digestion	0.00195839
PAAD	ACOXL,ACTG2,ADAMDEC1,ADGRA1,ADGRG2,ADORA2B,AGXT,AKR1C4,ALPI,ALPK2,AMER2,APLN,APOBEC4,ARHGAP19-SLIT1,ARHGAP36,ARHGEF26-AS1,ARMC3,AS3MT,ASIC4,ATP1A3,B3GAT1,BRINP1,BRSK1,BTBD16,BTBD6P1,C1orf158,C1orf194,C1orf87,C1QL1,C1QL2,C1QL4,C1QTNF1-AS1,C4orf47,C5orf46,CA10,CALHM1,CAMKV,CAMP,CCL21,CCN6,CCNYL2,CDH4,CDX1,CELA2A,CELA2B,CES5AP1,CFAP47,CFAP52,CFAP77,CHIT1,CHRNA2,CHRNA9,CIDEA,CISTR,CLPS,CMTM5,CNN1,CNR…	R-HSA-2871837	FCERI mediated NF-kB activation	0.00268649
PAAD	ACOXL,ACTG2,ADAMDEC1,ADGRA1,ADGRG2,ADORA2B,AGXT,AKR1C4,ALPI,ALPK2,AMER2,APLN,APOBEC4,ARHGAP19-SLIT1,ARHGAP36,ARHGEF26-AS1,ARMC3,AS3MT,ASIC4,ATP1A3,B3GAT1,BRINP1,BRSK1,BTBD16,BTBD6P1,C1orf158,C1orf194,C1orf87,C1QL1,C1QL2,C1QL4,C1QTNF1-AS1,C4orf47,C5orf46,CA10,CALHM1,CAMKV,CAMP,CCL21,CCN6,CCNYL2,CDH4,CDX1,CELA2A,CELA2B,CES5AP1,CFAP47,CFAP52,CFAP77,CHIT1,CHRNA2,CHRNA9,CIDEA,CISTR,CLPS,CMTM5,CNN1,CNR…	R-HSA-5668914	Diseases of metabolism	0.00354154
PAAD	ACOXL,ACTG2,ADAMDEC1,ADGRA1,ADGRG2,ADORA2B,AGXT,AKR1C4,ALPI,ALPK2,AMER2,APLN,APOBEC4,ARHGAP19-SLIT1,ARHGAP36,ARHGEF26-AS1,ARMC3,AS3MT,ASIC4,ATP1A3,B3GAT1,BRINP1,BRSK1,BTBD16,BTBD6P1,C1orf158,C1orf194,C1orf87,C1QL1,C1QL2,C1QL4,C1QTNF1-AS1,C4orf47,C5orf46,CA10,CALHM1,CAMKV,CAMP,CCL21,CCN6,CCNYL2,CDH4,CDX1,CELA2A,CELA2B,CES5AP1,CFAP47,CFAP52,CFAP77,CHIT1,CHRNA2,CHRNA9,CIDEA,CISTR,CLPS,CMTM5,CNN1,CNR…	R-HSA-8963743	Digestion and absorption	0.00463668
PAAD	ACOXL,ACTG2,ADAMDEC1,ADGRA1,ADGRG2,ADORA2B,AGXT,AKR1C4,ALPI,ALPK2,AMER2,APLN,APOBEC4,ARHGAP19-SLIT1,ARHGAP36,ARHGEF26-AS1,ARMC3,AS3MT,ASIC4,ATP1A3,B3GAT1,BRINP1,BRSK1,BTBD16,BTBD6P1,C1orf158,C1orf194,C1orf87,C1QL1,C1QL2,C1QL4,C1QTNF1-AS1,C4orf47,C5orf46,CA10,CALHM1,CAMKV,CAMP,CCL21,CCN6,CCNYL2,CDH4,CDX1,CELA2A,CELA2B,CES5AP1,CFAP47,CFAP52,CFAP77,CHIT1,CHRNA2,CHRNA9,CIDEA,CISTR,CLPS,CMTM5,CNN1,CNR…	R-HSA-5673001	RAF/MAP kinase cascade	0.00480393
PAAD	ACOXL,ACTG2,ADAMDEC1,ADGRA1,ADGRG2,ADORA2B,AGXT,AKR1C4,ALPI,ALPK2,AMER2,APLN,APOBEC4,ARHGAP19-SLIT1,ARHGAP36,ARHGEF26-AS1,ARMC3,AS3MT,ASIC4,ATP1A3,B3GAT1,BRINP1,BRSK1,BTBD16,BTBD6P1,C1orf158,C1orf194,C1orf87,C1QL1,C1QL2,C1QL4,C1QTNF1-AS1,C4orf47,C5orf46,CA10,CALHM1,CAMKV,CAMP,CCL21,CCN6,CCNYL2,CDH4,CDX1,CELA2A,CELA2B,CES5AP1,CFAP47,CFAP52,CFAP77,CHIT1,CHRNA2,CHRNA9,CIDEA,CISTR,CLPS,CMTM5,CNN1,CNR…	R-HSA-983705	Signaling by the B Cell Receptor (BCR)	0.00553233
PAAD	ACOXL,ACTG2,ADAMDEC1,ADGRA1,ADGRG2,ADORA2B,AGXT,AKR1C4,ALPI,ALPK2,AMER2,APLN,APOBEC4,ARHGAP19-SLIT1,ARHGAP36,ARHGEF26-AS1,ARMC3,AS3MT,ASIC4,ATP1A3,B3GAT1,BRINP1,BRSK1,BTBD16,BTBD6P1,C1orf158,C1orf194,C1orf87,C1QL1,C1QL2,C1QL4,C1QTNF1-AS1,C4orf47,C5orf46,CA10,CALHM1,CAMKV,CAMP,CCL21,CCN6,CCNYL2,CDH4,CDX1,CELA2A,CELA2B,CES5AP1,CFAP47,CFAP52,CFAP77,CHIT1,CHRNA2,CHRNA9,CIDEA,CISTR,CLPS,CMTM5,CNN1,CNR…	R-HSA-5684996	MAPK1/MAPK3 signaling	0.00574537
PAAD	ACOXL,ACTG2,ADAMDEC1,ADGRA1,ADGRG2,ADORA2B,AGXT,AKR1C4,ALPI,ALPK2,AMER2,APLN,APOBEC4,ARHGAP19-SLIT1,ARHGAP36,ARHGEF26-AS1,ARMC3,AS3MT,ASIC4,ATP1A3,B3GAT1,BRINP1,BRSK1,BTBD16,BTBD6P1,C1orf158,C1orf194,C1orf87,C1QL1,C1QL2,C1QL4,C1QTNF1-AS1,C4orf47,C5orf46,CA10,CALHM1,CAMKV,CAMP,CCL21,CCN6,CCNYL2,CDH4,CDX1,CELA2A,CELA2B,CES5AP1,CFAP47,CFAP52,CFAP77,CHIT1,CHRNA2,CHRNA9,CIDEA,CISTR,CLPS,CMTM5,CNN1,CNR…	R-HSA-9607240	FLT3 Signaling	0.00810463
PAAD	ACOXL,ACTG2,ADAMDEC1,ADGRA1,ADGRG2,ADORA2B,AGXT,AKR1C4,ALPI,ALPK2,AMER2,APLN,APOBEC4,ARHGAP19-SLIT1,ARHGAP36,ARHGEF26-AS1,ARMC3,AS3MT,ASIC4,ATP1A3,B3GAT1,BRINP1,BRSK1,BTBD16,BTBD6P1,C1orf158,C1orf194,C1orf87,C1QL1,C1QL2,C1QL4,C1QTNF1-AS1,C4orf47,C5orf46,CA10,CALHM1,CAMKV,CAMP,CCL21,CCN6,CCNYL2,CDH4,CDX1,CELA2A,CELA2B,CES5AP1,CFAP47,CFAP52,CFAP77,CHIT1,CHRNA2,CHRNA9,CIDEA,CISTR,CLPS,CMTM5,CNN1,CNR…	R-HSA-381426	Regulation of Insulin-like Growth Factor (IGF) transport and uptake by Insulin-like Growth Factor Binding Proteins (IGFBPs)	0.00985197
PAAD	ACOXL,ACTG2,ADAMDEC1,ADGRA1,ADGRG2,ADORA2B,AGXT,AKR1C4,ALPI,ALPK2,AMER2,APLN,APOBEC4,ARHGAP19-SLIT1,ARHGAP36,ARHGEF26-AS1,ARMC3,AS3MT,ASIC4,ATP1A3,B3GAT1,BRINP1,BRSK1,BTBD16,BTBD6P1,C1orf158,C1orf194,C1orf87,C1QL1,C1QL2,C1QL4,C1QTNF1-AS1,C4orf47,C5orf46,CA10,CALHM1,CAMKV,CAMP,CCL21,CCN6,CCNYL2,CDH4,CDX1,CELA2A,CELA2B,CES5AP1,CFAP47,CFAP52,CFAP77,CHIT1,CHRNA2,CHRNA9,CIDEA,CISTR,CLPS,CMTM5,CNN1,CNR…	R-HSA-194002	Glucocorticoid biosynthesis	0.00996198
PAAD	ACOXL,ACTG2,ADAMDEC1,ADGRA1,ADGRG2,ADORA2B,AGXT,AKR1C4,ALPI,ALPK2,AMER2,APLN,APOBEC4,ARHGAP19-SLIT1,ARHGAP36,ARHGEF26-AS1,ARMC3,AS3MT,ASIC4,ATP1A3,B3GAT1,BRINP1,BRSK1,BTBD16,BTBD6P1,C1orf158,C1orf194,C1orf87,C1QL1,C1QL2,C1QL4,C1QTNF1-AS1,C4orf47,C5orf46,CA10,CALHM1,CAMKV,CAMP,CCL21,CCN6,CCNYL2,CDH4,CDX1,CELA2A,CELA2B,CES5AP1,CFAP47,CFAP52,CFAP77,CHIT1,CHRNA2,CHRNA9,CIDEA,CISTR,CLPS,CMTM5,CNN1,CNR…	R-HSA-1280215	Cytokine Signaling in Immune system	0.0175235
PAAD	ACOXL,ACTG2,ADAMDEC1,ADGRA1,ADGRG2,ADORA2B,AGXT,AKR1C4,ALPI,ALPK2,AMER2,APLN,APOBEC4,ARHGAP19-SLIT1,ARHGAP36,ARHGEF26-AS1,ARMC3,AS3MT,ASIC4,ATP1A3,B3GAT1,BRINP1,BRSK1,BTBD16,BTBD6P1,C1orf158,C1orf194,C1orf87,C1QL1,C1QL2,C1QL4,C1QTNF1-AS1,C4orf47,C5orf46,CA10,CALHM1,CAMKV,CAMP,CCL21,CCN6,CCNYL2,CDH4,CDX1,CELA2A,CELA2B,CES5AP1,CFAP47,CFAP52,CFAP77,CHIT1,CHRNA2,CHRNA9,CIDEA,CISTR,CLPS,CMTM5,CNN1,CNR…	R-HSA-2454202	Fc epsilon receptor (FCERI) signaling	0.0183061
PAAD	ACOXL,ACTG2,ADAMDEC1,ADGRA1,ADGRG2,ADORA2B,AGXT,AKR1C4,ALPI,ALPK2,AMER2,APLN,APOBEC4,ARHGAP19-SLIT1,ARHGAP36,ARHGEF26-AS1,ARMC3,AS3MT,ASIC4,ATP1A3,B3GAT1,BRINP1,BRSK1,BTBD16,BTBD6P1,C1orf158,C1orf194,C1orf87,C1QL1,C1QL2,C1QL4,C1QTNF1-AS1,C4orf47,C5orf46,CA10,CALHM1,CAMKV,CAMP,CCL21,CCN6,CCNYL2,CDH4,CDX1,CELA2A,CELA2B,CES5AP1,CFAP47,CFAP52,CFAP77,CHIT1,CHRNA2,CHRNA9,CIDEA,CISTR,CLPS,CMTM5,CNN1,CNR…	R-HSA-556833	Metabolism of lipids	0.023125
PAAD	ACOXL,ACTG2,ADAMDEC1,ADGRA1,ADGRG2,ADORA2B,AGXT,AKR1C4,ALPI,ALPK2,AMER2,APLN,APOBEC4,ARHGAP19-SLIT1,ARHGAP36,ARHGEF26-AS1,ARMC3,AS3MT,ASIC4,ATP1A3,B3GAT1,BRINP1,BRSK1,BTBD16,BTBD6P1,C1orf158,C1orf194,C1orf87,C1QL1,C1QL2,C1QL4,C1QTNF1-AS1,C4orf47,C5orf46,CA10,CALHM1,CAMKV,CAMP,CCL21,CCN6,CCNYL2,CDH4,CDX1,CELA2A,CELA2B,CES5AP1,CFAP47,CFAP52,CFAP77,CHIT1,CHRNA2,CHRNA9,CIDEA,CISTR,CLPS,CMTM5,CNN1,CNR…	R-HSA-354194	GRB2:SOS provides linkage to MAPK signaling for Integrins	0.0373047
PAAD	ACOXL,ACTG2,ADAMDEC1,ADGRA1,ADGRG2,ADORA2B,AGXT,AKR1C4,ALPI,ALPK2,AMER2,APLN,APOBEC4,ARHGAP19-SLIT1,ARHGAP36,ARHGEF26-AS1,ARMC3,AS3MT,ASIC4,ATP1A3,B3GAT1,BRINP1,BRSK1,BTBD16,BTBD6P1,C1orf158,C1orf194,C1orf87,C1QL1,C1QL2,C1QL4,C1QTNF1-AS1,C4orf47,C5orf46,CA10,CALHM1,CAMKV,CAMP,CCL21,CCN6,CCNYL2,CDH4,CDX1,CELA2A,CELA2B,CES5AP1,CFAP47,CFAP52,CFAP77,CHIT1,CHRNA2,CHRNA9,CIDEA,CISTR,CLPS,CMTM5,CNN1,CNR…	R-HSA-372708	p130Cas linkage to MAPK signaling for integrins	0.0373047
PAAD	ACOXL,ACTG2,ADAMDEC1,ADGRA1,ADGRG2,ADORA2B,AGXT,AKR1C4,ALPI,ALPK2,AMER2,APLN,APOBEC4,ARHGAP19-SLIT1,ARHGAP36,ARHGEF26-AS1,ARMC3,AS3MT,ASIC4,ATP1A3,B3GAT1,BRINP1,BRSK1,BTBD16,BTBD6P1,C1orf158,C1orf194,C1orf87,C1QL1,C1QL2,C1QL4,C1QTNF1-AS1,C4orf47,C5orf46,CA10,CALHM1,CAMKV,CAMP,CCL21,CCN6,CCNYL2,CDH4,CDX1,CELA2A,CELA2B,CES5AP1,CFAP47,CFAP52,CFAP77,CHIT1,CHRNA2,CHRNA9,CIDEA,CISTR,CLPS,CMTM5,CNN1,CNR…	R-HSA-373080	Class B/2 (Secretin family receptors)	0.0400064
PRAD	ACTA1,ADAM18,ADGRF5P2,ADH1A,AKAP14,AKR1B1,ANGPTL3,ANO1,ARHGAP26-AS1,ARL14,ARMC2-AS1,ASIC2,ASTN1,ATP11A-AS1,ATP1A4,ATP5MC2P3,BACH1-IT2,BAIAP2L2,BCRP7,C10orf99,C1orf87,C8orf17,C8orf86,CA4,CACYBPP1,CBR3,CDH2,CDHR4,CDK5R2,CEACAM5,CELF2-AS1,CFAP77,CHRNG,CLMAT3,CLPSL2,COL18A1-AS1,COL2A1,COX6A2,CSF3,DBIL5P2,DDX10P1,DIAPH2-AS1,DIRC3,DLGAP1-AS5,DMRT2,DUSP27,DYDC2,EEF1DP3,EFNA2,ENKUR,ETF1P1,EVA1A,FAM167A,F…	R-HSA-382551	Transport of small molecules	0.0109021
PRAD	ACTA1,ADAM18,ADGRF5P2,ADH1A,AKAP14,AKR1B1,ANGPTL3,ANO1,ARHGAP26-AS1,ARL14,ARMC2-AS1,ASIC2,ASTN1,ATP11A-AS1,ATP1A4,ATP5MC2P3,BACH1-IT2,BAIAP2L2,BCRP7,C10orf99,C1orf87,C8orf17,C8orf86,CA4,CACYBPP1,CBR3,CDH2,CDHR4,CDK5R2,CEACAM5,CELF2-AS1,CFAP77,CHRNG,CLMAT3,CLPSL2,COL18A1-AS1,COL2A1,COX6A2,CSF3,DBIL5P2,DDX10P1,DIAPH2-AS1,DIRC3,DLGAP1-AS5,DMRT2,DUSP27,DYDC2,EEF1DP3,EFNA2,ENKUR,ETF1P1,EVA1A,FAM167A,F…	R-HSA-909733	Interferon alpha/beta signaling	0.0371104
THCA	ADAMTS14,ADGRE2,ALG13-AS1,ANAPC1,ANGPTL5,ANKS1A,ARHGEF38,ATXN1L,AVEN,AZGP1,AZU1,B3GNT10,BATF,BCL2L10,BNIP3P5,BOD1L1,BPTF,BTBD8,C10orf105,C11orf96,C15orf48,C19orf53,C1QL2,C9orf16,CARTPT,CCDC117,CCDC170,CCDC84-DT,CD300LF,CD55,CD63,CD70,CHAMP1,CHRND,CLDN10-AS1,CNFN,DBI,DERL3,DGCR6,DGKB,DYNC1LI2,EBLN2,EEF1G,ELFN1-AS1,FAM160A1-DT,FAM20A,FAM24B,FAM66A,FAM83E,FAM89B,FFAR2,FLG,GJA3,GNG12-AS1,GNG4,GNL3L,G…	R-HSA-168256	Immune System	7.97175e-05
THCA	ADAMTS14,ADGRE2,ALG13-AS1,ANAPC1,ANGPTL5,ANKS1A,ARHGEF38,ATXN1L,AVEN,AZGP1,AZU1,B3GNT10,BATF,BCL2L10,BNIP3P5,BOD1L1,BPTF,BTBD8,C10orf105,C11orf96,C15orf48,C19orf53,C1QL2,C9orf16,CARTPT,CCDC117,CCDC170,CCDC84-DT,CD300LF,CD55,CD63,CD70,CHAMP1,CHRND,CLDN10-AS1,CNFN,DBI,DERL3,DGCR6,DGKB,DYNC1LI2,EBLN2,EEF1G,ELFN1-AS1,FAM160A1-DT,FAM20A,FAM24B,FAM66A,FAM83E,FAM89B,FFAR2,FLG,GJA3,GNG12-AS1,GNG4,GNL3L,G…	R-HSA-500792	GPCR ligand binding	0.000604718
THCA	ADAMTS14,ADGRE2,ALG13-AS1,ANAPC1,ANGPTL5,ANKS1A,ARHGEF38,ATXN1L,AVEN,AZGP1,AZU1,B3GNT10,BATF,BCL2L10,BNIP3P5,BOD1L1,BPTF,BTBD8,C10orf105,C11orf96,C15orf48,C19orf53,C1QL2,C9orf16,CARTPT,CCDC117,CCDC170,CCDC84-DT,CD300LF,CD55,CD63,CD70,CHAMP1,CHRND,CLDN10-AS1,CNFN,DBI,DERL3,DGCR6,DGKB,DYNC1LI2,EBLN2,EEF1G,ELFN1-AS1,FAM160A1-DT,FAM20A,FAM24B,FAM66A,FAM83E,FAM89B,FFAR2,FLG,GJA3,GNG12-AS1,GNG4,GNL3L,G…	R-HSA-372790	Signaling by GPCR	0.00123762
THCA	ADAMTS14,ADGRE2,ALG13-AS1,ANAPC1,ANGPTL5,ANKS1A,ARHGEF38,ATXN1L,AVEN,AZGP1,AZU1,B3GNT10,BATF,BCL2L10,BNIP3P5,BOD1L1,BPTF,BTBD8,C10orf105,C11orf96,C15orf48,C19orf53,C1QL2,C9orf16,CARTPT,CCDC117,CCDC170,CCDC84-DT,CD300LF,CD55,CD63,CD70,CHAMP1,CHRND,CLDN10-AS1,CNFN,DBI,DERL3,DGCR6,DGKB,DYNC1LI2,EBLN2,EEF1G,ELFN1-AS1,FAM160A1-DT,FAM20A,FAM24B,FAM66A,FAM83E,FAM89B,FFAR2,FLG,GJA3,GNG12-AS1,GNG4,GNL3L,G…	R-HSA-5653656	Vesicle-mediated transport	0.00289115
THCA	ADAMTS14,ADGRE2,ALG13-AS1,ANAPC1,ANGPTL5,ANKS1A,ARHGEF38,ATXN1L,AVEN,AZGP1,AZU1,B3GNT10,BATF,BCL2L10,BNIP3P5,BOD1L1,BPTF,BTBD8,C10orf105,C11orf96,C15orf48,C19orf53,C1QL2,C9orf16,CARTPT,CCDC117,CCDC170,CCDC84-DT,CD300LF,CD55,CD63,CD70,CHAMP1,CHRND,CLDN10-AS1,CNFN,DBI,DERL3,DGCR6,DGKB,DYNC1LI2,EBLN2,EEF1G,ELFN1-AS1,FAM160A1-DT,FAM20A,FAM24B,FAM66A,FAM83E,FAM89B,FFAR2,FLG,GJA3,GNG12-AS1,GNG4,GNL3L,G…	R-HSA-199991	Membrane Trafficking	0.00551187
THCA	ADAMTS14,ADGRE2,ALG13-AS1,ANAPC1,ANGPTL5,ANKS1A,ARHGEF38,ATXN1L,AVEN,AZGP1,AZU1,B3GNT10,BATF,BCL2L10,BNIP3P5,BOD1L1,BPTF,BTBD8,C10orf105,C11orf96,C15orf48,C19orf53,C1QL2,C9orf16,CARTPT,CCDC117,CCDC170,CCDC84-DT,CD300LF,CD55,CD63,CD70,CHAMP1,CHRND,CLDN10-AS1,CNFN,DBI,DERL3,DGCR6,DGKB,DYNC1LI2,EBLN2,EEF1G,ELFN1-AS1,FAM160A1-DT,FAM20A,FAM24B,FAM66A,FAM83E,FAM89B,FFAR2,FLG,GJA3,GNG12-AS1,GNG4,GNL3L,G…	R-HSA-597592	Post-translational protein modification	0.00578104
THCA	ADAMTS14,ADGRE2,ALG13-AS1,ANAPC1,ANGPTL5,ANKS1A,ARHGEF38,ATXN1L,AVEN,AZGP1,AZU1,B3GNT10,BATF,BCL2L10,BNIP3P5,BOD1L1,BPTF,BTBD8,C10orf105,C11orf96,C15orf48,C19orf53,C1QL2,C9orf16,CARTPT,CCDC117,CCDC170,CCDC84-DT,CD300LF,CD55,CD63,CD70,CHAMP1,CHRND,CLDN10-AS1,CNFN,DBI,DERL3,DGCR6,DGKB,DYNC1LI2,EBLN2,EEF1G,ELFN1-AS1,FAM160A1-DT,FAM20A,FAM24B,FAM66A,FAM83E,FAM89B,FFAR2,FLG,GJA3,GNG12-AS1,GNG4,GNL3L,G…	R-HSA-416476	G alpha (q) signalling events	0.00849153
THCA	ADAMTS14,ADGRE2,ALG13-AS1,ANAPC1,ANGPTL5,ANKS1A,ARHGEF38,ATXN1L,AVEN,AZGP1,AZU1,B3GNT10,BATF,BCL2L10,BNIP3P5,BOD1L1,BPTF,BTBD8,C10orf105,C11orf96,C15orf48,C19orf53,C1QL2,C9orf16,CARTPT,CCDC117,CCDC170,CCDC84-DT,CD300LF,CD55,CD63,CD70,CHAMP1,CHRND,CLDN10-AS1,CNFN,DBI,DERL3,DGCR6,DGKB,DYNC1LI2,EBLN2,EEF1G,ELFN1-AS1,FAM160A1-DT,FAM20A,FAM24B,FAM66A,FAM83E,FAM89B,FFAR2,FLG,GJA3,GNG12-AS1,GNG4,GNL3L,G…	R-HSA-199977	ER to Golgi Anterograde Transport	0.0135408
THCA	ADAMTS14,ADGRE2,ALG13-AS1,ANAPC1,ANGPTL5,ANKS1A,ARHGEF38,ATXN1L,AVEN,AZGP1,AZU1,B3GNT10,BATF,BCL2L10,BNIP3P5,BOD1L1,BPTF,BTBD8,C10orf105,C11orf96,C15orf48,C19orf53,C1QL2,C9orf16,CARTPT,CCDC117,CCDC170,CCDC84-DT,CD300LF,CD55,CD63,CD70,CHAMP1,CHRND,CLDN10-AS1,CNFN,DBI,DERL3,DGCR6,DGKB,DYNC1LI2,EBLN2,EEF1G,ELFN1-AS1,FAM160A1-DT,FAM20A,FAM24B,FAM66A,FAM83E,FAM89B,FFAR2,FLG,GJA3,GNG12-AS1,GNG4,GNL3L,G…	R-HSA-392499	Metabolism of proteins	0.0137062
THCA	ADAMTS14,ADGRE2,ALG13-AS1,ANAPC1,ANGPTL5,ANKS1A,ARHGEF38,ATXN1L,AVEN,AZGP1,AZU1,B3GNT10,BATF,BCL2L10,BNIP3P5,BOD1L1,BPTF,BTBD8,C10orf105,C11orf96,C15orf48,C19orf53,C1QL2,C9orf16,CARTPT,CCDC117,CCDC170,CCDC84-DT,CD300LF,CD55,CD63,CD70,CHAMP1,CHRND,CLDN10-AS1,CNFN,DBI,DERL3,DGCR6,DGKB,DYNC1LI2,EBLN2,EEF1G,ELFN1-AS1,FAM160A1-DT,FAM20A,FAM24B,FAM66A,FAM83E,FAM89B,FFAR2,FLG,GJA3,GNG12-AS1,GNG4,GNL3L,G…	R-HSA-948021	Transport to the Golgi and subsequent modification	0.0366021
THCA	ADAMTS14,ADGRE2,ALG13-AS1,ANAPC1,ANGPTL5,ANKS1A,ARHGEF38,ATXN1L,AVEN,AZGP1,AZU1,B3GNT10,BATF,BCL2L10,BNIP3P5,BOD1L1,BPTF,BTBD8,C10orf105,C11orf96,C15orf48,C19orf53,C1QL2,C9orf16,CARTPT,CCDC117,CCDC170,CCDC84-DT,CD300LF,CD55,CD63,CD70,CHAMP1,CHRND,CLDN10-AS1,CNFN,DBI,DERL3,DGCR6,DGKB,DYNC1LI2,EBLN2,EEF1G,ELFN1-AS1,FAM160A1-DT,FAM20A,FAM24B,FAM66A,FAM83E,FAM89B,FFAR2,FLG,GJA3,GNG12-AS1,GNG4,GNL3L,G…	R-HSA-446203	Asparagine N-linked glycosylation	0.0386569
THCA	ADAMTS14,ADGRE2,ALG13-AS1,ANAPC1,ANGPTL5,ANKS1A,ARHGEF38,ATXN1L,AVEN,AZGP1,AZU1,B3GNT10,BATF,BCL2L10,BNIP3P5,BOD1L1,BPTF,BTBD8,C10orf105,C11orf96,C15orf48,C19orf53,C1QL2,C9orf16,CARTPT,CCDC117,CCDC170,CCDC84-DT,CD300LF,CD55,CD63,CD70,CHAMP1,CHRND,CLDN10-AS1,CNFN,DBI,DERL3,DGCR6,DGKB,DYNC1LI2,EBLN2,EEF1G,ELFN1-AS1,FAM160A1-DT,FAM20A,FAM24B,FAM66A,FAM83E,FAM89B,FFAR2,FLG,GJA3,GNG12-AS1,GNG4,GNL3L,G…	R-HSA-162582	Signal Transduction	0.0423972
UCEC	AADACL2,ABCA4,ABCC12,ACKR4,ACSM2A,ACTA2,ACTBL2,ADAMTS16,ADAMTS9-AS1,ADARB2-AS1,ADGRB3,ADH1C,ADH4,ADIPOQ,ADIPOR1P1,ADRA2B,AGGF1P3,AIRN,AKR1B15,AKR1C1,AKT3-IT1,AMBP,ANKFN1,ANKRD30A,ANKRD36BP2,ANKS1B,ANKS4B,ANPEP,ANXA13,AOX1,APOH,AQP10,AREG,ARHGAP27P2,ARHGAP42P1,ARHGDIG,ARL5C,ARLNC1,ASAP1-IT2,ASPN,ATP1A2,AVIL,AZGP1P2,BAAT,BCAS2P1,BCL9P1,BIRC8,BMP2,BOK-AS1,BOLA3P4,BPIFC,C12orf40,C14orf39,C17orf98,C18…	R-HSA-162582	Signal Transduction	3.94048e-13
UCEC	AADACL2,ABCA4,ABCC12,ACKR4,ACSM2A,ACTA2,ACTBL2,ADAMTS16,ADAMTS9-AS1,ADARB2-AS1,ADGRB3,ADH1C,ADH4,ADIPOQ,ADIPOR1P1,ADRA2B,AGGF1P3,AIRN,AKR1B15,AKR1C1,AKT3-IT1,AMBP,ANKFN1,ANKRD30A,ANKRD36BP2,ANKS1B,ANKS4B,ANPEP,ANXA13,AOX1,APOH,AQP10,AREG,ARHGAP27P2,ARHGAP42P1,ARHGDIG,ARL5C,ARLNC1,ASAP1-IT2,ASPN,ATP1A2,AVIL,AZGP1P2,BAAT,BCAS2P1,BCL9P1,BIRC8,BMP2,BOK-AS1,BOLA3P4,BPIFC,C12orf40,C14orf39,C17orf98,C18…	R-HSA-372790	Signaling by GPCR	3.64294e-10
UCEC	AADACL2,ABCA4,ABCC12,ACKR4,ACSM2A,ACTA2,ACTBL2,ADAMTS16,ADAMTS9-AS1,ADARB2-AS1,ADGRB3,ADH1C,ADH4,ADIPOQ,ADIPOR1P1,ADRA2B,AGGF1P3,AIRN,AKR1B15,AKR1C1,AKT3-IT1,AMBP,ANKFN1,ANKRD30A,ANKRD36BP2,ANKS1B,ANKS4B,ANPEP,ANXA13,AOX1,APOH,AQP10,AREG,ARHGAP27P2,ARHGAP42P1,ARHGDIG,ARL5C,ARLNC1,ASAP1-IT2,ASPN,ATP1A2,AVIL,AZGP1P2,BAAT,BCAS2P1,BCL9P1,BIRC8,BMP2,BOK-AS1,BOLA3P4,BPIFC,C12orf40,C14orf39,C17orf98,C18…	R-HSA-388396	GPCR downstream signalling	1.79494e-09
UCEC	AADACL2,ABCA4,ABCC12,ACKR4,ACSM2A,ACTA2,ACTBL2,ADAMTS16,ADAMTS9-AS1,ADARB2-AS1,ADGRB3,ADH1C,ADH4,ADIPOQ,ADIPOR1P1,ADRA2B,AGGF1P3,AIRN,AKR1B15,AKR1C1,AKT3-IT1,AMBP,ANKFN1,ANKRD30A,ANKRD36BP2,ANKS1B,ANKS4B,ANPEP,ANXA13,AOX1,APOH,AQP10,AREG,ARHGAP27P2,ARHGAP42P1,ARHGDIG,ARL5C,ARLNC1,ASAP1-IT2,ASPN,ATP1A2,AVIL,AZGP1P2,BAAT,BCAS2P1,BCL9P1,BIRC8,BMP2,BOK-AS1,BOLA3P4,BPIFC,C12orf40,C14orf39,C17orf98,C18…	R-HSA-500792	GPCR ligand binding	3.29065e-06
UCEC	AADACL2,ABCA4,ABCC12,ACKR4,ACSM2A,ACTA2,ACTBL2,ADAMTS16,ADAMTS9-AS1,ADARB2-AS1,ADGRB3,ADH1C,ADH4,ADIPOQ,ADIPOR1P1,ADRA2B,AGGF1P3,AIRN,AKR1B15,AKR1C1,AKT3-IT1,AMBP,ANKFN1,ANKRD30A,ANKRD36BP2,ANKS1B,ANKS4B,ANPEP,ANXA13,AOX1,APOH,AQP10,AREG,ARHGAP27P2,ARHGAP42P1,ARHGDIG,ARL5C,ARLNC1,ASAP1-IT2,ASPN,ATP1A2,AVIL,AZGP1P2,BAAT,BCAS2P1,BCL9P1,BIRC8,BMP2,BOK-AS1,BOLA3P4,BPIFC,C12orf40,C14orf39,C17orf98,C18…	R-HSA-373076	Class A/1 (Rhodopsin-like receptors)	9.61934e-06
UCEC	AADACL2,ABCA4,ABCC12,ACKR4,ACSM2A,ACTA2,ACTBL2,ADAMTS16,ADAMTS9-AS1,ADARB2-AS1,ADGRB3,ADH1C,ADH4,ADIPOQ,ADIPOR1P1,ADRA2B,AGGF1P3,AIRN,AKR1B15,AKR1C1,AKT3-IT1,AMBP,ANKFN1,ANKRD30A,ANKRD36BP2,ANKS1B,ANKS4B,ANPEP,ANXA13,AOX1,APOH,AQP10,AREG,ARHGAP27P2,ARHGAP42P1,ARHGDIG,ARL5C,ARLNC1,ASAP1-IT2,ASPN,ATP1A2,AVIL,AZGP1P2,BAAT,BCAS2P1,BCL9P1,BIRC8,BMP2,BOK-AS1,BOLA3P4,BPIFC,C12orf40,C14orf39,C17orf98,C18…	R-HSA-1266738	Developmental Biology	5.37988e-05
UCEC	AADACL2,ABCA4,ABCC12,ACKR4,ACSM2A,ACTA2,ACTBL2,ADAMTS16,ADAMTS9-AS1,ADARB2-AS1,ADGRB3,ADH1C,ADH4,ADIPOQ,ADIPOR1P1,ADRA2B,AGGF1P3,AIRN,AKR1B15,AKR1C1,AKT3-IT1,AMBP,ANKFN1,ANKRD30A,ANKRD36BP2,ANKS1B,ANKS4B,ANPEP,ANXA13,AOX1,APOH,AQP10,AREG,ARHGAP27P2,ARHGAP42P1,ARHGDIG,ARL5C,ARLNC1,ASAP1-IT2,ASPN,ATP1A2,AVIL,AZGP1P2,BAAT,BCAS2P1,BCL9P1,BIRC8,BMP2,BOK-AS1,BOLA3P4,BPIFC,C12orf40,C14orf39,C17orf98,C18…	R-HSA-418594	G alpha (i) signalling events	0.000123514
UCEC	AADACL2,ABCA4,ABCC12,ACKR4,ACSM2A,ACTA2,ACTBL2,ADAMTS16,ADAMTS9-AS1,ADARB2-AS1,ADGRB3,ADH1C,ADH4,ADIPOQ,ADIPOR1P1,ADRA2B,AGGF1P3,AIRN,AKR1B15,AKR1C1,AKT3-IT1,AMBP,ANKFN1,ANKRD30A,ANKRD36BP2,ANKS1B,ANKS4B,ANPEP,ANXA13,AOX1,APOH,AQP10,AREG,ARHGAP27P2,ARHGAP42P1,ARHGDIG,ARL5C,ARLNC1,ASAP1-IT2,ASPN,ATP1A2,AVIL,AZGP1P2,BAAT,BCAS2P1,BCL9P1,BIRC8,BMP2,BOK-AS1,BOLA3P4,BPIFC,C12orf40,C14orf39,C17orf98,C18…	R-HSA-6805567	Keratinization	0.000342163
UCEC	AADACL2,ABCA4,ABCC12,ACKR4,ACSM2A,ACTA2,ACTBL2,ADAMTS16,ADAMTS9-AS1,ADARB2-AS1,ADGRB3,ADH1C,ADH4,ADIPOQ,ADIPOR1P1,ADRA2B,AGGF1P3,AIRN,AKR1B15,AKR1C1,AKT3-IT1,AMBP,ANKFN1,ANKRD30A,ANKRD36BP2,ANKS1B,ANKS4B,ANPEP,ANXA13,AOX1,APOH,AQP10,AREG,ARHGAP27P2,ARHGAP42P1,ARHGDIG,ARL5C,ARLNC1,ASAP1-IT2,ASPN,ATP1A2,AVIL,AZGP1P2,BAAT,BCAS2P1,BCL9P1,BIRC8,BMP2,BOK-AS1,BOLA3P4,BPIFC,C12orf40,C14orf39,C17orf98,C18…	R-HSA-418555	G alpha (s) signalling events	0.000425783
UCEC	AADACL2,ABCA4,ABCC12,ACKR4,ACSM2A,ACTA2,ACTBL2,ADAMTS16,ADAMTS9-AS1,ADARB2-AS1,ADGRB3,ADH1C,ADH4,ADIPOQ,ADIPOR1P1,ADRA2B,AGGF1P3,AIRN,AKR1B15,AKR1C1,AKT3-IT1,AMBP,ANKFN1,ANKRD30A,ANKRD36BP2,ANKS1B,ANKS4B,ANPEP,ANXA13,AOX1,APOH,AQP10,AREG,ARHGAP27P2,ARHGAP42P1,ARHGDIG,ARL5C,ARLNC1,ASAP1-IT2,ASPN,ATP1A2,AVIL,AZGP1P2,BAAT,BCAS2P1,BCL9P1,BIRC8,BMP2,BOK-AS1,BOLA3P4,BPIFC,C12orf40,C14orf39,C17orf98,C18…	R-HSA-112316	Neuronal System	0.00350466
UCEC	AADACL2,ABCA4,ABCC12,ACKR4,ACSM2A,ACTA2,ACTBL2,ADAMTS16,ADAMTS9-AS1,ADARB2-AS1,ADGRB3,ADH1C,ADH4,ADIPOQ,ADIPOR1P1,ADRA2B,AGGF1P3,AIRN,AKR1B15,AKR1C1,AKT3-IT1,AMBP,ANKFN1,ANKRD30A,ANKRD36BP2,ANKS1B,ANKS4B,ANPEP,ANXA13,AOX1,APOH,AQP10,AREG,ARHGAP27P2,ARHGAP42P1,ARHGDIG,ARL5C,ARLNC1,ASAP1-IT2,ASPN,ATP1A2,AVIL,AZGP1P2,BAAT,BCAS2P1,BCL9P1,BIRC8,BMP2,BOK-AS1,BOLA3P4,BPIFC,C12orf40,C14orf39,C17orf98,C18…	R-HSA-190861	Gap junction assembly	0.0120416
UCEC	AADACL2,ABCA4,ABCC12,ACKR4,ACSM2A,ACTA2,ACTBL2,ADAMTS16,ADAMTS9-AS1,ADARB2-AS1,ADGRB3,ADH1C,ADH4,ADIPOQ,ADIPOR1P1,ADRA2B,AGGF1P3,AIRN,AKR1B15,AKR1C1,AKT3-IT1,AMBP,ANKFN1,ANKRD30A,ANKRD36BP2,ANKS1B,ANKS4B,ANPEP,ANXA13,AOX1,APOH,AQP10,AREG,ARHGAP27P2,ARHGAP42P1,ARHGDIG,ARL5C,ARLNC1,ASAP1-IT2,ASPN,ATP1A2,AVIL,AZGP1P2,BAAT,BCAS2P1,BCL9P1,BIRC8,BMP2,BOK-AS1,BOLA3P4,BPIFC,C12orf40,C14orf39,C17orf98,C18…	R-HSA-3656244	Defective B4GALT1 causes B4GALT1-CDG (CDG-2d)	0.0295876
UCEC	AADACL2,ABCA4,ABCC12,ACKR4,ACSM2A,ACTA2,ACTBL2,ADAMTS16,ADAMTS9-AS1,ADARB2-AS1,ADGRB3,ADH1C,ADH4,ADIPOQ,ADIPOR1P1,ADRA2B,AGGF1P3,AIRN,AKR1B15,AKR1C1,AKT3-IT1,AMBP,ANKFN1,ANKRD30A,ANKRD36BP2,ANKS1B,ANKS4B,ANPEP,ANXA13,AOX1,APOH,AQP10,AREG,ARHGAP27P2,ARHGAP42P1,ARHGDIG,ARL5C,ARLNC1,ASAP1-IT2,ASPN,ATP1A2,AVIL,AZGP1P2,BAAT,BCAS2P1,BCL9P1,BIRC8,BMP2,BOK-AS1,BOLA3P4,BPIFC,C12orf40,C14orf39,C17orf98,C18…	R-HSA-3656225	Defective CHST6 causes MCDC1	0.0295876
UCEC	AADACL2,ABCA4,ABCC12,ACKR4,ACSM2A,ACTA2,ACTBL2,ADAMTS16,ADAMTS9-AS1,ADARB2-AS1,ADGRB3,ADH1C,ADH4,ADIPOQ,ADIPOR1P1,ADRA2B,AGGF1P3,AIRN,AKR1B15,AKR1C1,AKT3-IT1,AMBP,ANKFN1,ANKRD30A,ANKRD36BP2,ANKS1B,ANKS4B,ANPEP,ANXA13,AOX1,APOH,AQP10,AREG,ARHGAP27P2,ARHGAP42P1,ARHGDIG,ARL5C,ARLNC1,ASAP1-IT2,ASPN,ATP1A2,AVIL,AZGP1P2,BAAT,BCAS2P1,BCL9P1,BIRC8,BMP2,BOK-AS1,BOLA3P4,BPIFC,C12orf40,C14orf39,C17orf98,C18…	R-HSA-3656243	Defective ST3GAL3 causes MCT12 and EIEE15	0.0295876
UCEC	AADACL2,ABCA4,ABCC12,ACKR4,ACSM2A,ACTA2,ACTBL2,ADAMTS16,ADAMTS9-AS1,ADARB2-AS1,ADGRB3,ADH1C,ADH4,ADIPOQ,ADIPOR1P1,ADRA2B,AGGF1P3,AIRN,AKR1B15,AKR1C1,AKT3-IT1,AMBP,ANKFN1,ANKRD30A,ANKRD36BP2,ANKS1B,ANKS4B,ANPEP,ANXA13,AOX1,APOH,AQP10,AREG,ARHGAP27P2,ARHGAP42P1,ARHGDIG,ARL5C,ARLNC1,ASAP1-IT2,ASPN,ATP1A2,AVIL,AZGP1P2,BAAT,BCAS2P1,BCL9P1,BIRC8,BMP2,BOK-AS1,BOLA3P4,BPIFC,C12orf40,C14orf39,C17orf98,C18…	R-HSA-382551	Transport of small molecules	0.0376764
UCEC	AADACL2,ABCA4,ABCC12,ACKR4,ACSM2A,ACTA2,ACTBL2,ADAMTS16,ADAMTS9-AS1,ADARB2-AS1,ADGRB3,ADH1C,ADH4,ADIPOQ,ADIPOR1P1,ADRA2B,AGGF1P3,AIRN,AKR1B15,AKR1C1,AKT3-IT1,AMBP,ANKFN1,ANKRD30A,ANKRD36BP2,ANKS1B,ANKS4B,ANPEP,ANXA13,AOX1,APOH,AQP10,AREG,ARHGAP27P2,ARHGAP42P1,ARHGDIG,ARL5C,ARLNC1,ASAP1-IT2,ASPN,ATP1A2,AVIL,AZGP1P2,BAAT,BCAS2P1,BCL9P1,BIRC8,BMP2,BOK-AS1,BOLA3P4,BPIFC,C12orf40,C14orf39,C17orf98,C18…	R-HSA-381753	Olfactory Signaling Pathway	0.0487117

## Sheet: KEGG PATHWAYS
	KEGG PATHWAYS
Cancer	Gene Set (Entrez ID)	KEGG Pathway	Adjusted p-value
BLCA	201651,24,1244,64241,730249,134526,72,146,155,57016,23783,56311,100996567,149773,8862,403314,147429,416,431705,80816,106478961,23743,646,100421698,149954,101929425,10917,143379,196415,100422299,338872,727964,84103,286189,138724,100133204,760,762,766,100874038,8618,100132159,79012,93661,147372,9720,221262,160777,220047,887,1232,650172,948,27442,1113,1132,1137,246715,160365,64084,1269,6900,399948,1…	KEGG_LINOLEIC_ACID_METABOLISM	0.00342231
BLCA	201651,24,1244,64241,730249,134526,72,146,155,57016,23783,56311,100996567,149773,8862,403314,147429,416,431705,80816,106478961,23743,646,100421698,149954,101929425,10917,143379,196415,100422299,338872,727964,84103,286189,138724,100133204,760,762,766,100874038,8618,100132159,79012,93661,147372,9720,221262,160777,220047,887,1232,650172,948,27442,1113,1132,1137,246715,160365,64084,1269,6900,399948,1…	KEGG_NEUROACTIVE_LIGAND_RECEPTOR_INTERACTION	0.00342231
BLCA	201651,24,1244,64241,730249,134526,72,146,155,57016,23783,56311,100996567,149773,8862,403314,147429,416,431705,80816,106478961,23743,646,100421698,149954,101929425,10917,143379,196415,100422299,338872,727964,84103,286189,138724,100133204,760,762,766,100874038,8618,100132159,79012,93661,147372,9720,221262,160777,220047,887,1232,650172,948,27442,1113,1132,1137,246715,160365,64084,1269,6900,399948,1…	KEGG_METABOLISM_OF_XENOBIOTICS_BY_CYTOCHROME_P450	0.0107684
BLCA	201651,24,1244,64241,730249,134526,72,146,155,57016,23783,56311,100996567,149773,8862,403314,147429,416,431705,80816,106478961,23743,646,100421698,149954,101929425,10917,143379,196415,100422299,338872,727964,84103,286189,138724,100133204,760,762,766,100874038,8618,100132159,79012,93661,147372,9720,221262,160777,220047,887,1232,650172,948,27442,1113,1132,1137,246715,160365,64084,1269,6900,399948,1…	KEGG_STEROID_HORMONE_BIOSYNTHESIS	0.0192518
BLCA	201651,24,1244,64241,730249,134526,72,146,155,57016,23783,56311,100996567,149773,8862,403314,147429,416,431705,80816,106478961,23743,646,100421698,149954,101929425,10917,143379,196415,100422299,338872,727964,84103,286189,138724,100133204,760,762,766,100874038,8618,100132159,79012,93661,147372,9720,221262,160777,220047,887,1232,650172,948,27442,1113,1132,1137,246715,160365,64084,1269,6900,399948,1…	KEGG_RETINOL_METABOLISM	0.0306062
BLCA	201651,24,1244,64241,730249,134526,72,146,155,57016,23783,56311,100996567,149773,8862,403314,147429,416,431705,80816,106478961,23743,646,100421698,149954,101929425,10917,143379,196415,100422299,338872,727964,84103,286189,138724,100133204,760,762,766,100874038,8618,100132159,79012,93661,147372,9720,221262,160777,220047,887,1232,650172,948,27442,1113,1132,1137,246715,160365,64084,1269,6900,399948,1…	KEGG_DRUG_METABOLISM_CYTOCHROME_P450	0.0385512
BLCA	201651,24,1244,64241,730249,134526,72,146,155,57016,23783,56311,100996567,149773,8862,403314,147429,416,431705,80816,106478961,23743,646,100421698,149954,101929425,10917,143379,196415,100422299,338872,727964,84103,286189,138724,100133204,760,762,766,100874038,8618,100132159,79012,93661,147372,9720,221262,160777,220047,887,1232,650172,948,27442,1113,1132,1137,246715,160365,64084,1269,6900,399948,1…	KEGG_NITROGEN_METABOLISM	0.0385512
BLCA	201651,24,1244,64241,730249,134526,72,146,155,57016,23783,56311,100996567,149773,8862,403314,147429,416,431705,80816,106478961,23743,646,100421698,149954,101929425,10917,143379,196415,100422299,338872,727964,84103,286189,138724,100133204,760,762,766,100874038,8618,100132159,79012,93661,147372,9720,221262,160777,220047,887,1232,650172,948,27442,1113,1132,1137,246715,160365,64084,1269,6900,399948,1…	KEGG_PROXIMAL_TUBULE_BICARBONATE_RECLAMATION	0.0385512
BRCA	201651,18,154664,10351,150000,340485,2532,130013,23305,72,8748,80332,103689846,9508,101929335,339366,111,221393,10149,124,125,9370,136,84740,158798,57016,100862662,238,259,139285,205147,100420921,100286979,391267,91074,554226,390616,148741,645784,107080639,203286,8416,344454,164284,9582,403314,347,89872,375719,367,100874246,343578,100507524,54848,132946,55130,101060171,419,420,220202,84913,491,55…	KEGG_CYTOKINE_CYTOKINE_RECEPTOR_INTERACTION	0.0321374
CESC	8309,345651,72,171019,103689846,2015,124,131,1646,8854,218,251,115701,55018,203859,8862,440461,121549,220202,100128516,8313,8707,338707,285696,111216284,154442,118611,254439,114905,401115,285556,27202,168090,84688,783,10753,100130873,838,147372,93233,129881,399693,885,6358,6362,6363,6368,1013,8941,1044,25790,317775,9071,1365,119467,1264,1271,1302,7373,81578,136227,1311,9384,1357,10814,1392,1393,1…	KEGG_METABOLISM_OF_XENOBIOTICS_BY_CYTOCHROME_P450	0.00270558
CESC	8309,345651,72,171019,103689846,2015,124,131,1646,8854,218,251,115701,55018,203859,8862,440461,121549,220202,100128516,8313,8707,338707,285696,111216284,154442,118611,254439,114905,401115,285556,27202,168090,84688,783,10753,100130873,838,147372,93233,129881,399693,885,6358,6362,6363,6368,1013,8941,1044,25790,317775,9071,1365,119467,1264,1271,1302,7373,81578,136227,1311,9384,1357,10814,1392,1393,1…	KEGG_DRUG_METABOLISM_CYTOCHROME_P450	0.00270558
CESC	8309,345651,72,171019,103689846,2015,124,131,1646,8854,218,251,115701,55018,203859,8862,440461,121549,220202,100128516,8313,8707,338707,285696,111216284,154442,118611,254439,114905,401115,285556,27202,168090,84688,783,10753,100130873,838,147372,93233,129881,399693,885,6358,6362,6363,6368,1013,8941,1044,25790,317775,9071,1365,119467,1264,1271,1302,7373,81578,136227,1311,9384,1357,10814,1392,1393,1…	KEGG_RETINOL_METABOLISM	0.00761731
KIRC	18,8647,51412,255926,170690,222611,727915,10551,189,23746,100128817,100129769,100874303,251,259,265,100421018,729171,374860,653145,164284,319,363,100874372,100996425,41,554235,460,285973,100289092,124496,9212,126859,100130402,157556,10409,388553,391472,112401,106480284,66037,100505383,254240,100422268,106481724,100141515,93190,286189,759,100420043,796,388743,378807,158506,126402,148870,220047,109…	KEGG_SYSTEMIC_LUPUS_ERYTHEMATOSUS	0.0100891
LAML	9625,25890,55289,9719,326342,64123,124,127,646114,213,216,217,59344,249,288,63926,253650,348840,102723552,440482,100652899,653145,728113,323,187,348,58504,100689073,9411,143872,64283,445328,100131629,379,641380,55616,57205,491,552,9531,105373509,103695435,4059,103344929,638,106480286,57795,79762,79098,713,10882,126567,285311,285668,100127983,759,100996348,100874234,100874370,784,23066,8436,91050,…	KEGG_FOLATE_BIOSYNTHESIS	0.0368937
LGG	107985353,26027,151,389658,100287718,375719,142689,107126287,701,399949,643037,128602,401335,116328,286189,761,8912,133690,151278,339184,6362,6349,414062,9560,10576,50489,255119,25790,149465,1142,1278,81578,1392,3627,6373,3576,164781,101929222,29947,53905,84417,2020,653316,105377486,144809,84624,146481,57818,2564,11227,2667,645367,2735,2825,80045,9293,283902,102723346,100129706,100506311,3199,320…	KEGG_CHEMOKINE_SIGNALING_PATHWAY	0.00116349
LGG	107985353,26027,151,389658,100287718,375719,142689,107126287,701,399949,643037,128602,401335,116328,286189,761,8912,133690,151278,339184,6362,6349,414062,9560,10576,50489,255119,25790,149465,1142,1278,81578,1392,3627,6373,3576,164781,101929222,29947,53905,84417,2020,653316,105377486,144809,84624,146481,57818,2564,11227,2667,645367,2735,2825,80045,9293,283902,102723346,100129706,100506311,3199,320…	KEGG_CYTOKINE_CYTOKINE_RECEPTOR_INTERACTION	0.00116349
LGG	107985353,26027,151,389658,100287718,375719,142689,107126287,701,399949,643037,128602,401335,116328,286189,761,8912,133690,151278,339184,6362,6349,414062,9560,10576,50489,255119,25790,149465,1142,1278,81578,1392,3627,6373,3576,164781,101929222,29947,53905,84417,2020,653316,105377486,144809,84624,146481,57818,2564,11227,2667,645367,2735,2825,80045,9293,283902,102723346,100129706,100506311,3199,320…	KEGG_NEUROACTIVE_LIGAND_RECEPTOR_INTERACTION	0.0363802
LIHC	340273,174,51327,100132104,26289,158798,348840,645784,63982,312,306,100874075,416,340075,728619,338707,618,146439,66037,80341,286494,387882,644809,647024,92291,101929244,347273,440416,440184,83879,1007,56853,10715,9022,389160,1379,90993,1470,1474,6373,284340,780,54514,26220,93099,285489,389023,554236,165545,100507500,2020,4072,100616446,54845,83648,732538,79368,83417,2348,2297,56884,2555,55879,25…	KEGG_NEUROACTIVE_LIGAND_RECEPTOR_INTERACTION	0.00458614
LUAD	650655,142827,100418920,100422407,103689846,100288319,391267,100874247,100132420,653145,80117,140456,100288307,10317,646201,400500,388553,347359,106481693,100421709,118611,387695,254439,283461,128653,246312,340073,203076,794,796,101929110,859,440184,344807,100129297,166979,1038,1041,1094,1057,646096,63924,1047,574016,7401,119467,101927465,414316,1421,389903,360180,1557,100996571,1617,646378,10087…	KEGG_SYSTEMIC_LUPUS_ERYTHEMATOSUS	8.18753e-45
LUSC	29974,344752,64240,145447,130013,390928,123876,103689846,100128127,183,205147,149992,340120,257629,107126360,337,100533990,55937,10777,142685,401036,429,647219,100423060,100874518,284257,60467,254240,676,647166,145858,162083,388276,92346,148345,338761,338872,388960,731,763,765,2694,126402,196477,1097,3078,100874507,100420342,285888,1269,1370,54544,203413,352905,399697,100288463,1584,414301,613210…	KEGG_NEUROACTIVE_LIGAND_RECEPTOR_INTERACTION	0.0175139
OV	140625,642394,125,9370,84740,57016,100862662,285016,248,258,277,642460,100287718,147429,440461,158833,85319,101928040,53630,389206,640,9210,100128849,106480280,414157,118461,146723,127003,127795,128602,100190949,29113,606553,51806,125972,339512,886,6359,339521,166979,255101,114335,93659,1141,1144,387836,154790,93978,392343,205272,1280,728763,200575,102723631,1504,646243,1548,728597,139189,1734,17…	KEGG_NEUROACTIVE_LIGAND_RECEPTOR_INTERACTION	0.00071739
PAAD	55289,72,27299,84435,10149,136,189,1109,248,115701,219287,8862,403314,100533184,158763,100507524,219681,57412,55515,478,27087,1620,84446,118663,646330,93190,127003,127795,10882,165257,338761,100507410,441054,389336,56934,255022,79012,820,6366,8838,414194,1002,1044,63036,51032,649264,286464,146845,389799,1118,1135,55584,1149,102216268,1208,116173,1264,1269,1296,10815,1378,1379,1412,1428,1439,1447,…	KEGG_STEROID_HORMONE_BIOSYNTHESIS	0.0348651
UCEC	344752,24,94160,51554,123876,59,345651,170690,101929335,642394,577,126,127,9370,645220,151,391552,100271873,441282,1645,100874263,259,162282,91074,645784,56899,257629,290,312,316,350,89872,374,440461,100887075,398,390790,100996425,100507117,54829,477,10677,401393,570,100127960,100419324,112401,650,100379249,106480324,254240,283461,317761,388381,644041,100128603,10485,401027,722,152940,100507249,1…	KEGG_SYSTEMIC_LUPUS_ERYTHEMATOSUS	0.00155672
UCEC	344752,24,94160,51554,123876,59,345651,170690,101929335,642394,577,126,127,9370,645220,151,391552,100271873,441282,1645,100874263,259,162282,91074,645784,56899,257629,290,312,316,350,89872,374,440461,100887075,398,390790,100996425,100507117,54829,477,10677,401393,570,100127960,100419324,112401,650,100379249,106480324,254240,283461,317761,388381,644041,100128603,10485,401027,722,152940,100507249,1…	KEGG_METABOLISM_OF_XENOBIOTICS_BY_CYTOCHROME_P450	0.0160683
UCEC	344752,24,94160,51554,123876,59,345651,170690,101929335,642394,577,126,127,9370,645220,151,391552,100271873,441282,1645,100874263,259,162282,91074,645784,56899,257629,290,312,316,350,89872,374,440461,100887075,398,390790,100996425,100507117,54829,477,10677,401393,570,100127960,100419324,112401,650,100379249,106480324,254240,283461,317761,388381,644041,100128603,10485,401027,722,152940,100507249,1…	KEGG_DRUG_METABOLISM_CYTOCHROME_P450	0.0160683

## Sheet: CANCER HALLMARK TERMS
	REACTOME PATHWAYS
Cancer	Gene Set (Entrez ID)	Hallmark Term	Adjusted p-value
ACC	54,122622,181,245,164284,343,9181,554235,467,100132677,79908,118611,254439,713,388581,114898,717,126567,221416,771,822,114769,57571,401237,387856,100874261,9560,30835,124599,971,941,9308,83879,1015,1005,10669,9435,150468,1158,23529,100419056,1277,50509,1292,1370,1378,1521,80157,3627,79901,56603,81501,1641,23564,26220,9228,79962,9046,56896,199221,83401,84034,2019,2020,377841,285220,151176,57471,54…	HALLMARK_EPITHELIAL_MESENCHYMAL_TRANSITION	0.0127623
BRCA	201651,18,154664,10351,150000,340485,2532,130013,23305,72,8748,80332,103689846,9508,101929335,339366,111,221393,10149,124,125,9370,136,84740,158798,57016,100862662,238,259,139285,205147,100420921,100286979,391267,91074,554226,390616,148741,645784,107080639,203286,8416,344454,164284,9582,403314,347,89872,375719,367,100874246,343578,100507524,54848,132946,55130,101060171,419,420,220202,84913,491,55…	HALLMARK_ESTROGEN_RESPONSE_LATE	0.00260874
BRCA	201651,18,154664,10351,150000,340485,2532,130013,23305,72,8748,80332,103689846,9508,101929335,339366,111,221393,10149,124,125,9370,136,84740,158798,57016,100862662,238,259,139285,205147,100420921,100286979,391267,91074,554226,390616,148741,645784,107080639,203286,8416,344454,164284,9582,403314,347,89872,375719,367,100874246,343578,100507524,54848,132946,55130,101060171,419,420,220202,84913,491,55…	HALLMARK_ESTROGEN_RESPONSE_EARLY	0.0170949
CESC	8309,345651,72,171019,103689846,2015,124,131,1646,8854,218,251,115701,55018,203859,8862,440461,121549,220202,100128516,8313,8707,338707,285696,111216284,154442,118611,254439,114905,401115,285556,27202,168090,84688,783,10753,100130873,838,147372,93233,129881,399693,885,6358,6362,6363,6368,1013,8941,1044,25790,317775,9071,1365,119467,1264,1271,1302,7373,81578,136227,1311,9384,1357,10814,1392,1393,1…	HALLMARK_KRAS_SIGNALING_DN	0.0223696
CESC	8309,345651,72,171019,103689846,2015,124,131,1646,8854,218,251,115701,55018,203859,8862,440461,121549,220202,100128516,8313,8707,338707,285696,111216284,154442,118611,254439,114905,401115,285556,27202,168090,84688,783,10753,100130873,838,147372,93233,129881,399693,885,6358,6362,6363,6368,1013,8941,1044,25790,317775,9071,1365,119467,1264,1271,1302,7373,81578,136227,1311,9384,1357,10814,1392,1393,1…	HALLMARK_HEDGEHOG_SIGNALING	0.0306984
DLBC	51146,176,170487,11086,104,126,57016,22977,253650,84168,361,221481,645432,496,563,10331,55509,92747,387763,84419,79098,149466,145741,388125,352999,401546,92291,388743,10753,257062,23624,2694,399693,124093,6355,894,909,131450,1026,1084,27159,83539,9080,23601,129607,149111,79935,1358,55057,1510,284340,3577,3579,1544,1556,160518,1740,64446,10570,405753,1780,1937,387712,57669,2064,127254,131177,14577…	HALLMARK_KRAS_SIGNALING_DN	0.0129473
ESCA	126767,94160,653190,326268,390928,123876,2515,8745,11085,255926,8756,171019,400406,100507098,108,117,57211,648947,218,100421018,10218,100101938,554226,55107,344454,339,319,350,147429,362,363,158763,415,84913,477,100422469,157556,168620,391472,112401,106480285,100288948,339479,154442,282966,56673,124773,284546,114905,84281,102724231,722,133874,729,730,389649,100133204,85438,57863,440067,845,79820,…	HALLMARK_MYOGENESIS	0.00452729
ESCA	126767,94160,653190,326268,390928,123876,2515,8745,11085,255926,8756,171019,400406,100507098,108,117,57211,648947,218,100421018,10218,100101938,554226,55107,344454,339,319,350,147429,362,363,158763,415,84913,477,100422469,157556,168620,391472,112401,106480285,100288948,339479,154442,282966,56673,124773,284546,114905,84281,102724231,722,133874,729,730,389649,100133204,85438,57863,440067,845,79820,…	HALLMARK_COAGULATION	0.00655989
HNSC	344752,21,10149,280,653436,100287718,398,219681,10033,491,100379249,317716,388419,341032,388701,257407,389336,134121,29113,253962,163688,440854,859,147381,8941,200373,94115,63924,9071,1365,440508,1047,399948,341947,286204,49860,8048,1510,1556,1571,1572,1618,54798,115265,1673,201140,1755,63946,1768,100628315,138971,92749,1812,84332,645311,102725541,101927125,133121,100144602,148753,51252,388882,10…	HALLMARK_MYOGENESIS	0.00921453
KIRC	18,8647,51412,255926,170690,222611,727915,10551,189,23746,100128817,100129769,100874303,251,259,265,100421018,729171,374860,653145,164284,319,363,100874372,100996425,41,554235,460,285973,100289092,124496,9212,126859,100130402,157556,10409,388553,391472,112401,106480284,66037,100505383,254240,100422268,106481724,100141515,93190,286189,759,100420043,796,388743,378807,158506,126402,148870,220047,109…	HALLMARK_E2F_TARGETS	0.000117707
KIRC	18,8647,51412,255926,170690,222611,727915,10551,189,23746,100128817,100129769,100874303,251,259,265,100421018,729171,374860,653145,164284,319,363,100874372,100996425,41,554235,460,285973,100289092,124496,9212,126859,100130402,157556,10409,388553,391472,112401,106480284,66037,100505383,254240,100422268,106481724,100141515,93190,286189,759,100420043,796,388743,378807,158506,126402,148870,220047,109…	HALLMARK_G2M_CHECKPOINT	0.000367044
LAML	9625,25890,55289,9719,326342,64123,124,127,646114,213,216,217,59344,249,288,63926,253650,348840,102723552,440482,100652899,653145,728113,323,187,348,58504,100689073,9411,143872,64283,445328,100131629,379,641380,55616,57205,491,552,9531,105373509,103695435,4059,103344929,638,106480286,57795,79762,79098,713,10882,126567,285311,285668,100127983,759,100996348,100874234,100874370,784,23066,8436,91050,…	HALLMARK_KRAS_SIGNALING_UP	0.00227393
LUAD	650655,142827,100418920,100422407,103689846,100288319,391267,100874247,100132420,653145,80117,140456,100288307,10317,646201,400500,388553,347359,106481693,100421709,118611,387695,254439,283461,128653,246312,340073,203076,794,796,101929110,859,440184,344807,100129297,166979,1038,1041,1094,1057,646096,63924,1047,574016,7401,119467,101927465,414316,1421,389903,360180,1557,100996571,1617,646378,10087…	HALLMARK_KRAS_SIGNALING_DN	0.00740495
PRAD	58,8749,441416,124,158798,231,27329,55107,100874239,80117,101929716,40,460,100874205,480,100507097,100874322,80115,100133163,387695,127795,100507249,389649,762,100420043,874,1000,389118,8941,1048,414196,389799,1146,101927096,389383,378832,1280,1339,1440,100169989,100421371,10824,729582,284215,10655,92235,84332,196549,1943,219670,6824,84141,83648,9834,388698,166752,64090,729403,106480740,2731,2723…	HALLMARK_MYOGENESIS	0.0169544

## Sheet: GO TERMS
	REACTOME PATHWAYS
Cancer	Gene Set (Entrez ID)	Ontology	GO ID	GO Term	Adjusted p-value
BLCA	201651,24,1244,64241,730249,134526,72,146,155,57016,23783,56311,100996567,149773,8862,403314,147429,416,431705,80816,106478961,23743,646,100421698,149954,101929425,10917,143379,196415,100422299,338872,727964,84103,286189,138724,100133204,760,762,766,100874038,8618,100132159,79012,93661,147372,9720,221262,160777,220047,887,1232,650172,948,27442,1113,1132,1137,246715,160365,64084,1269,6900,399948,1…	BP	GO:0045745	positive regulation of G protein-coupled receptor signaling pathway	0.0150722
BRCA	201651,18,154664,10351,150000,340485,2532,130013,23305,72,8748,80332,103689846,9508,101929335,339366,111,221393,10149,124,125,9370,136,84740,158798,57016,100862662,238,259,139285,205147,100420921,100286979,391267,91074,554226,390616,148741,645784,107080639,203286,8416,344454,164284,9582,403314,347,89872,375719,367,100874246,343578,100507524,54848,132946,55130,101060171,419,420,220202,84913,491,55…	CC	GO:0030673	axolemma	0.0205852
BRCA	201651,18,154664,10351,150000,340485,2532,130013,23305,72,8748,80332,103689846,9508,101929335,339366,111,221393,10149,124,125,9370,136,84740,158798,57016,100862662,238,259,139285,205147,100420921,100286979,391267,91074,554226,390616,148741,645784,107080639,203286,8416,344454,164284,9582,403314,347,89872,375719,367,100874246,343578,100507524,54848,132946,55130,101060171,419,420,220202,84913,491,55…	MF	GO:0048018	receptor ligand activity	0.00301016
BRCA	201651,18,154664,10351,150000,340485,2532,130013,23305,72,8748,80332,103689846,9508,101929335,339366,111,221393,10149,124,125,9370,136,84740,158798,57016,100862662,238,259,139285,205147,100420921,100286979,391267,91074,554226,390616,148741,645784,107080639,203286,8416,344454,164284,9582,403314,347,89872,375719,367,100874246,343578,100507524,54848,132946,55130,101060171,419,420,220202,84913,491,55…	MF	GO:0030545	receptor regulator activity	0.00301016
BRCA	201651,18,154664,10351,150000,340485,2532,130013,23305,72,8748,80332,103689846,9508,101929335,339366,111,221393,10149,124,125,9370,136,84740,158798,57016,100862662,238,259,139285,205147,100420921,100286979,391267,91074,554226,390616,148741,645784,107080639,203286,8416,344454,164284,9582,403314,347,89872,375719,367,100874246,343578,100507524,54848,132946,55130,101060171,419,420,220202,84913,491,55…	MF	GO:0005125	cytokine activity	0.00301016
BRCA	201651,18,154664,10351,150000,340485,2532,130013,23305,72,8748,80332,103689846,9508,101929335,339366,111,221393,10149,124,125,9370,136,84740,158798,57016,100862662,238,259,139285,205147,100420921,100286979,391267,91074,554226,390616,148741,645784,107080639,203286,8416,344454,164284,9582,403314,347,89872,375719,367,100874246,343578,100507524,54848,132946,55130,101060171,419,420,220202,84913,491,55…	MF	GO:0005244	voltage-gated ion channel activity	0.0329086
BRCA	201651,18,154664,10351,150000,340485,2532,130013,23305,72,8748,80332,103689846,9508,101929335,339366,111,221393,10149,124,125,9370,136,84740,158798,57016,100862662,238,259,139285,205147,100420921,100286979,391267,91074,554226,390616,148741,645784,107080639,203286,8416,344454,164284,9582,403314,347,89872,375719,367,100874246,343578,100507524,54848,132946,55130,101060171,419,420,220202,84913,491,55…	MF	GO:0022832	voltage-gated channel activity	0.0329086
BRCA	201651,18,154664,10351,150000,340485,2532,130013,23305,72,8748,80332,103689846,9508,101929335,339366,111,221393,10149,124,125,9370,136,84740,158798,57016,100862662,238,259,139285,205147,100420921,100286979,391267,91074,554226,390616,148741,645784,107080639,203286,8416,344454,164284,9582,403314,347,89872,375719,367,100874246,343578,100507524,54848,132946,55130,101060171,419,420,220202,84913,491,55…	MF	GO:0022839	ion gated channel activity	0.0329086
BRCA	201651,18,154664,10351,150000,340485,2532,130013,23305,72,8748,80332,103689846,9508,101929335,339366,111,221393,10149,124,125,9370,136,84740,158798,57016,100862662,238,259,139285,205147,100420921,100286979,391267,91074,554226,390616,148741,645784,107080639,203286,8416,344454,164284,9582,403314,347,89872,375719,367,100874246,343578,100507524,54848,132946,55130,101060171,419,420,220202,84913,491,55…	MF	GO:0022836	gated channel activity	0.0329086
BRCA	201651,18,154664,10351,150000,340485,2532,130013,23305,72,8748,80332,103689846,9508,101929335,339366,111,221393,10149,124,125,9370,136,84740,158798,57016,100862662,238,259,139285,205147,100420921,100286979,391267,91074,554226,390616,148741,645784,107080639,203286,8416,344454,164284,9582,403314,347,89872,375719,367,100874246,343578,100507524,54848,132946,55130,101060171,419,420,220202,84913,491,55…	MF	GO:0030594	neurotransmitter receptor activity	0.0343641
BRCA	201651,18,154664,10351,150000,340485,2532,130013,23305,72,8748,80332,103689846,9508,101929335,339366,111,221393,10149,124,125,9370,136,84740,158798,57016,100862662,238,259,139285,205147,100420921,100286979,391267,91074,554226,390616,148741,645784,107080639,203286,8416,344454,164284,9582,403314,347,89872,375719,367,100874246,343578,100507524,54848,132946,55130,101060171,419,420,220202,84913,491,55…	MF	GO:0005261	cation channel activity	0.0343641
BRCA	201651,18,154664,10351,150000,340485,2532,130013,23305,72,8748,80332,103689846,9508,101929335,339366,111,221393,10149,124,125,9370,136,84740,158798,57016,100862662,238,259,139285,205147,100420921,100286979,391267,91074,554226,390616,148741,645784,107080639,203286,8416,344454,164284,9582,403314,347,89872,375719,367,100874246,343578,100507524,54848,132946,55130,101060171,419,420,220202,84913,491,55…	MF	GO:0022843	voltage-gated cation channel activity	0.0343641
BRCA	201651,18,154664,10351,150000,340485,2532,130013,23305,72,8748,80332,103689846,9508,101929335,339366,111,221393,10149,124,125,9370,136,84740,158798,57016,100862662,238,259,139285,205147,100420921,100286979,391267,91074,554226,390616,148741,645784,107080639,203286,8416,344454,164284,9582,403314,347,89872,375719,367,100874246,343578,100507524,54848,132946,55130,101060171,419,420,220202,84913,491,55…	MF	GO:0022838	substrate-specific channel activity	0.0475246
BRCA	201651,18,154664,10351,150000,340485,2532,130013,23305,72,8748,80332,103689846,9508,101929335,339366,111,221393,10149,124,125,9370,136,84740,158798,57016,100862662,238,259,139285,205147,100420921,100286979,391267,91074,554226,390616,148741,645784,107080639,203286,8416,344454,164284,9582,403314,347,89872,375719,367,100874246,343578,100507524,54848,132946,55130,101060171,419,420,220202,84913,491,55…	MF	GO:0015267	channel activity	0.049523
BRCA	201651,18,154664,10351,150000,340485,2532,130013,23305,72,8748,80332,103689846,9508,101929335,339366,111,221393,10149,124,125,9370,136,84740,158798,57016,100862662,238,259,139285,205147,100420921,100286979,391267,91074,554226,390616,148741,645784,107080639,203286,8416,344454,164284,9582,403314,347,89872,375719,367,100874246,343578,100507524,54848,132946,55130,101060171,419,420,220202,84913,491,55…	MF	GO:0030414	peptidase inhibitor activity	0.049523
BRCA	201651,18,154664,10351,150000,340485,2532,130013,23305,72,8748,80332,103689846,9508,101929335,339366,111,221393,10149,124,125,9370,136,84740,158798,57016,100862662,238,259,139285,205147,100420921,100286979,391267,91074,554226,390616,148741,645784,107080639,203286,8416,344454,164284,9582,403314,347,89872,375719,367,100874246,343578,100507524,54848,132946,55130,101060171,419,420,220202,84913,491,55…	MF	GO:0022803	passive transmembrane transporter activity	0.049523
CESC	8309,345651,72,171019,103689846,2015,124,131,1646,8854,218,251,115701,55018,203859,8862,440461,121549,220202,100128516,8313,8707,338707,285696,111216284,154442,118611,254439,114905,401115,285556,27202,168090,84688,783,10753,100130873,838,147372,93233,129881,399693,885,6358,6362,6363,6368,1013,8941,1044,25790,317775,9071,1365,119467,1264,1271,1302,7373,81578,136227,1311,9384,1357,10814,1392,1393,1…	BP	GO:0060541	respiratory system development	0.00204842
CESC	8309,345651,72,171019,103689846,2015,124,131,1646,8854,218,251,115701,55018,203859,8862,440461,121549,220202,100128516,8313,8707,338707,285696,111216284,154442,118611,254439,114905,401115,285556,27202,168090,84688,783,10753,100130873,838,147372,93233,129881,399693,885,6358,6362,6363,6368,1013,8941,1044,25790,317775,9071,1365,119467,1264,1271,1302,7373,81578,136227,1311,9384,1357,10814,1392,1393,1…	BP	GO:0030324	lung development	0.00204842
CESC	8309,345651,72,171019,103689846,2015,124,131,1646,8854,218,251,115701,55018,203859,8862,440461,121549,220202,100128516,8313,8707,338707,285696,111216284,154442,118611,254439,114905,401115,285556,27202,168090,84688,783,10753,100130873,838,147372,93233,129881,399693,885,6358,6362,6363,6368,1013,8941,1044,25790,317775,9071,1365,119467,1264,1271,1302,7373,81578,136227,1311,9384,1357,10814,1392,1393,1…	BP	GO:0030323	respiratory tube development	0.00204842
CESC	8309,345651,72,171019,103689846,2015,124,131,1646,8854,218,251,115701,55018,203859,8862,440461,121549,220202,100128516,8313,8707,338707,285696,111216284,154442,118611,254439,114905,401115,285556,27202,168090,84688,783,10753,100130873,838,147372,93233,129881,399693,885,6358,6362,6363,6368,1013,8941,1044,25790,317775,9071,1365,119467,1264,1271,1302,7373,81578,136227,1311,9384,1357,10814,1392,1393,1…	BP	GO:0014821	phasic smooth muscle contraction	0.00397207
CESC	8309,345651,72,171019,103689846,2015,124,131,1646,8854,218,251,115701,55018,203859,8862,440461,121549,220202,100128516,8313,8707,338707,285696,111216284,154442,118611,254439,114905,401115,285556,27202,168090,84688,783,10753,100130873,838,147372,93233,129881,399693,885,6358,6362,6363,6368,1013,8941,1044,25790,317775,9071,1365,119467,1264,1271,1302,7373,81578,136227,1311,9384,1357,10814,1392,1393,1…	BP	GO:0060349	bone morphogenesis	0.00410609
CESC	8309,345651,72,171019,103689846,2015,124,131,1646,8854,218,251,115701,55018,203859,8862,440461,121549,220202,100128516,8313,8707,338707,285696,111216284,154442,118611,254439,114905,401115,285556,27202,168090,84688,783,10753,100130873,838,147372,93233,129881,399693,885,6358,6362,6363,6368,1013,8941,1044,25790,317775,9071,1365,119467,1264,1271,1302,7373,81578,136227,1311,9384,1357,10814,1392,1393,1…	BP	GO:0045471	response to ethanol	0.00921532
CESC	8309,345651,72,171019,103689846,2015,124,131,1646,8854,218,251,115701,55018,203859,8862,440461,121549,220202,100128516,8313,8707,338707,285696,111216284,154442,118611,254439,114905,401115,285556,27202,168090,84688,783,10753,100130873,838,147372,93233,129881,399693,885,6358,6362,6363,6368,1013,8941,1044,25790,317775,9071,1365,119467,1264,1271,1302,7373,81578,136227,1311,9384,1357,10814,1392,1393,1…	BP	GO:0050678	regulation of epithelial cell proliferation	0.00921532
CESC	8309,345651,72,171019,103689846,2015,124,131,1646,8854,218,251,115701,55018,203859,8862,440461,121549,220202,100128516,8313,8707,338707,285696,111216284,154442,118611,254439,114905,401115,285556,27202,168090,84688,783,10753,100130873,838,147372,93233,129881,399693,885,6358,6362,6363,6368,1013,8941,1044,25790,317775,9071,1365,119467,1264,1271,1302,7373,81578,136227,1311,9384,1357,10814,1392,1393,1…	BP	GO:0003002	regionalization	0.00921532
CESC	8309,345651,72,171019,103689846,2015,124,131,1646,8854,218,251,115701,55018,203859,8862,440461,121549,220202,100128516,8313,8707,338707,285696,111216284,154442,118611,254439,114905,401115,285556,27202,168090,84688,783,10753,100130873,838,147372,93233,129881,399693,885,6358,6362,6363,6368,1013,8941,1044,25790,317775,9071,1365,119467,1264,1271,1302,7373,81578,136227,1311,9384,1357,10814,1392,1393,1…	BP	GO:0050673	epithelial cell proliferation	0.0145311
CESC	8309,345651,72,171019,103689846,2015,124,131,1646,8854,218,251,115701,55018,203859,8862,440461,121549,220202,100128516,8313,8707,338707,285696,111216284,154442,118611,254439,114905,401115,285556,27202,168090,84688,783,10753,100130873,838,147372,93233,129881,399693,885,6358,6362,6363,6368,1013,8941,1044,25790,317775,9071,1365,119467,1264,1271,1302,7373,81578,136227,1311,9384,1357,10814,1392,1393,1…	BP	GO:0007215	glutamate receptor signaling pathway	0.0145311
CESC	8309,345651,72,171019,103689846,2015,124,131,1646,8854,218,251,115701,55018,203859,8862,440461,121549,220202,100128516,8313,8707,338707,285696,111216284,154442,118611,254439,114905,401115,285556,27202,168090,84688,783,10753,100130873,838,147372,93233,129881,399693,885,6358,6362,6363,6368,1013,8941,1044,25790,317775,9071,1365,119467,1264,1271,1302,7373,81578,136227,1311,9384,1357,10814,1392,1393,1…	BP	GO:1901863	positive regulation of muscle tissue development	0.0173292
CESC	8309,345651,72,171019,103689846,2015,124,131,1646,8854,218,251,115701,55018,203859,8862,440461,121549,220202,100128516,8313,8707,338707,285696,111216284,154442,118611,254439,114905,401115,285556,27202,168090,84688,783,10753,100130873,838,147372,93233,129881,399693,885,6358,6362,6363,6368,1013,8941,1044,25790,317775,9071,1365,119467,1264,1271,1302,7373,81578,136227,1311,9384,1357,10814,1392,1393,1…	BP	GO:0007193	adenylate cyclase-inhibiting G protein-coupled receptor signaling pathway	0.0192101
CESC	8309,345651,72,171019,103689846,2015,124,131,1646,8854,218,251,115701,55018,203859,8862,440461,121549,220202,100128516,8313,8707,338707,285696,111216284,154442,118611,254439,114905,401115,285556,27202,168090,84688,783,10753,100130873,838,147372,93233,129881,399693,885,6358,6362,6363,6368,1013,8941,1044,25790,317775,9071,1365,119467,1264,1271,1302,7373,81578,136227,1311,9384,1357,10814,1392,1393,1…	BP	GO:0001501	skeletal system development	0.0242497
CESC	8309,345651,72,171019,103689846,2015,124,131,1646,8854,218,251,115701,55018,203859,8862,440461,121549,220202,100128516,8313,8707,338707,285696,111216284,154442,118611,254439,114905,401115,285556,27202,168090,84688,783,10753,100130873,838,147372,93233,129881,399693,885,6358,6362,6363,6368,1013,8941,1044,25790,317775,9071,1365,119467,1264,1271,1302,7373,81578,136227,1311,9384,1357,10814,1392,1393,1…	BP	GO:0006939	smooth muscle contraction	0.0242497
CESC	8309,345651,72,171019,103689846,2015,124,131,1646,8854,218,251,115701,55018,203859,8862,440461,121549,220202,100128516,8313,8707,338707,285696,111216284,154442,118611,254439,114905,401115,285556,27202,168090,84688,783,10753,100130873,838,147372,93233,129881,399693,885,6358,6362,6363,6368,1013,8941,1044,25790,317775,9071,1365,119467,1264,1271,1302,7373,81578,136227,1311,9384,1357,10814,1392,1393,1…	BP	GO:0060348	bone development	0.0249204
CESC	8309,345651,72,171019,103689846,2015,124,131,1646,8854,218,251,115701,55018,203859,8862,440461,121549,220202,100128516,8313,8707,338707,285696,111216284,154442,118611,254439,114905,401115,285556,27202,168090,84688,783,10753,100130873,838,147372,93233,129881,399693,885,6358,6362,6363,6368,1013,8941,1044,25790,317775,9071,1365,119467,1264,1271,1302,7373,81578,136227,1311,9384,1357,10814,1392,1393,1…	BP	GO:0006936	muscle contraction	0.0249204
CESC	8309,345651,72,171019,103689846,2015,124,131,1646,8854,218,251,115701,55018,203859,8862,440461,121549,220202,100128516,8313,8707,338707,285696,111216284,154442,118611,254439,114905,401115,285556,27202,168090,84688,783,10753,100130873,838,147372,93233,129881,399693,885,6358,6362,6363,6368,1013,8941,1044,25790,317775,9071,1365,119467,1264,1271,1302,7373,81578,136227,1311,9384,1357,10814,1392,1393,1…	BP	GO:0007389	pattern specification process	0.0249204
CESC	8309,345651,72,171019,103689846,2015,124,131,1646,8854,218,251,115701,55018,203859,8862,440461,121549,220202,100128516,8313,8707,338707,285696,111216284,154442,118611,254439,114905,401115,285556,27202,168090,84688,783,10753,100130873,838,147372,93233,129881,399693,885,6358,6362,6363,6368,1013,8941,1044,25790,317775,9071,1365,119467,1264,1271,1302,7373,81578,136227,1311,9384,1357,10814,1392,1393,1…	BP	GO:0097305	response to alcohol	0.0251859
CESC	8309,345651,72,171019,103689846,2015,124,131,1646,8854,218,251,115701,55018,203859,8862,440461,121549,220202,100128516,8313,8707,338707,285696,111216284,154442,118611,254439,114905,401115,285556,27202,168090,84688,783,10753,100130873,838,147372,93233,129881,399693,885,6358,6362,6363,6368,1013,8941,1044,25790,317775,9071,1365,119467,1264,1271,1302,7373,81578,136227,1311,9384,1357,10814,1392,1393,1…	BP	GO:0061053	somite development	0.031989
CESC	8309,345651,72,171019,103689846,2015,124,131,1646,8854,218,251,115701,55018,203859,8862,440461,121549,220202,100128516,8313,8707,338707,285696,111216284,154442,118611,254439,114905,401115,285556,27202,168090,84688,783,10753,100130873,838,147372,93233,129881,399693,885,6358,6362,6363,6368,1013,8941,1044,25790,317775,9071,1365,119467,1264,1271,1302,7373,81578,136227,1311,9384,1357,10814,1392,1393,1…	BP	GO:0001755	neural crest cell migration	0.031989
CESC	8309,345651,72,171019,103689846,2015,124,131,1646,8854,218,251,115701,55018,203859,8862,440461,121549,220202,100128516,8313,8707,338707,285696,111216284,154442,118611,254439,114905,401115,285556,27202,168090,84688,783,10753,100130873,838,147372,93233,129881,399693,885,6358,6362,6363,6368,1013,8941,1044,25790,317775,9071,1365,119467,1264,1271,1302,7373,81578,136227,1311,9384,1357,10814,1392,1393,1…	BP	GO:0048705	skeletal system morphogenesis	0.0351471
CESC	8309,345651,72,171019,103689846,2015,124,131,1646,8854,218,251,115701,55018,203859,8862,440461,121549,220202,100128516,8313,8707,338707,285696,111216284,154442,118611,254439,114905,401115,285556,27202,168090,84688,783,10753,100130873,838,147372,93233,129881,399693,885,6358,6362,6363,6368,1013,8941,1044,25790,317775,9071,1365,119467,1264,1271,1302,7373,81578,136227,1311,9384,1357,10814,1392,1393,1…	BP	GO:0070286	axonemal dynein complex assembly	0.0388214
CESC	8309,345651,72,171019,103689846,2015,124,131,1646,8854,218,251,115701,55018,203859,8862,440461,121549,220202,100128516,8313,8707,338707,285696,111216284,154442,118611,254439,114905,401115,285556,27202,168090,84688,783,10753,100130873,838,147372,93233,129881,399693,885,6358,6362,6363,6368,1013,8941,1044,25790,317775,9071,1365,119467,1264,1271,1302,7373,81578,136227,1311,9384,1357,10814,1392,1393,1…	BP	GO:0014032	neural crest cell development	0.0388214
CESC	8309,345651,72,171019,103689846,2015,124,131,1646,8854,218,251,115701,55018,203859,8862,440461,121549,220202,100128516,8313,8707,338707,285696,111216284,154442,118611,254439,114905,401115,285556,27202,168090,84688,783,10753,100130873,838,147372,93233,129881,399693,885,6358,6362,6363,6368,1013,8941,1044,25790,317775,9071,1365,119467,1264,1271,1302,7373,81578,136227,1311,9384,1357,10814,1392,1393,1…	BP	GO:0001756	somitogenesis	0.0398415
CESC	8309,345651,72,171019,103689846,2015,124,131,1646,8854,218,251,115701,55018,203859,8862,440461,121549,220202,100128516,8313,8707,338707,285696,111216284,154442,118611,254439,114905,401115,285556,27202,168090,84688,783,10753,100130873,838,147372,93233,129881,399693,885,6358,6362,6363,6368,1013,8941,1044,25790,317775,9071,1365,119467,1264,1271,1302,7373,81578,136227,1311,9384,1357,10814,1392,1393,1…	BP	GO:0007611	learning or memory	0.0398415
CESC	8309,345651,72,171019,103689846,2015,124,131,1646,8854,218,251,115701,55018,203859,8862,440461,121549,220202,100128516,8313,8707,338707,285696,111216284,154442,118611,254439,114905,401115,285556,27202,168090,84688,783,10753,100130873,838,147372,93233,129881,399693,885,6358,6362,6363,6368,1013,8941,1044,25790,317775,9071,1365,119467,1264,1271,1302,7373,81578,136227,1311,9384,1357,10814,1392,1393,1…	BP	GO:0072215	regulation of metanephros development	0.0398658
CESC	8309,345651,72,171019,103689846,2015,124,131,1646,8854,218,251,115701,55018,203859,8862,440461,121549,220202,100128516,8313,8707,338707,285696,111216284,154442,118611,254439,114905,401115,285556,27202,168090,84688,783,10753,100130873,838,147372,93233,129881,399693,885,6358,6362,6363,6368,1013,8941,1044,25790,317775,9071,1365,119467,1264,1271,1302,7373,81578,136227,1311,9384,1357,10814,1392,1393,1…	BP	GO:0048484	enteric nervous system development	0.0404519
CESC	8309,345651,72,171019,103689846,2015,124,131,1646,8854,218,251,115701,55018,203859,8862,440461,121549,220202,100128516,8313,8707,338707,285696,111216284,154442,118611,254439,114905,401115,285556,27202,168090,84688,783,10753,100130873,838,147372,93233,129881,399693,885,6358,6362,6363,6368,1013,8941,1044,25790,317775,9071,1365,119467,1264,1271,1302,7373,81578,136227,1311,9384,1357,10814,1392,1393,1…	BP	GO:0050679	positive regulation of epithelial cell proliferation	0.0409408
CESC	8309,345651,72,171019,103689846,2015,124,131,1646,8854,218,251,115701,55018,203859,8862,440461,121549,220202,100128516,8313,8707,338707,285696,111216284,154442,118611,254439,114905,401115,285556,27202,168090,84688,783,10753,100130873,838,147372,93233,129881,399693,885,6358,6362,6363,6368,1013,8941,1044,25790,317775,9071,1365,119467,1264,1271,1302,7373,81578,136227,1311,9384,1357,10814,1392,1393,1…	BP	GO:0014031	mesenchymal cell development	0.0421111
CESC	8309,345651,72,171019,103689846,2015,124,131,1646,8854,218,251,115701,55018,203859,8862,440461,121549,220202,100128516,8313,8707,338707,285696,111216284,154442,118611,254439,114905,401115,285556,27202,168090,84688,783,10753,100130873,838,147372,93233,129881,399693,885,6358,6362,6363,6368,1013,8941,1044,25790,317775,9071,1365,119467,1264,1271,1302,7373,81578,136227,1311,9384,1357,10814,1392,1393,1…	BP	GO:0048864	stem cell development	0.0421111
CESC	8309,345651,72,171019,103689846,2015,124,131,1646,8854,218,251,115701,55018,203859,8862,440461,121549,220202,100128516,8313,8707,338707,285696,111216284,154442,118611,254439,114905,401115,285556,27202,168090,84688,783,10753,100130873,838,147372,93233,129881,399693,885,6358,6362,6363,6368,1013,8941,1044,25790,317775,9071,1365,119467,1264,1271,1302,7373,81578,136227,1311,9384,1357,10814,1392,1393,1…	BP	GO:0045844	positive regulation of striated muscle tissue development	0.0423551
CESC	8309,345651,72,171019,103689846,2015,124,131,1646,8854,218,251,115701,55018,203859,8862,440461,121549,220202,100128516,8313,8707,338707,285696,111216284,154442,118611,254439,114905,401115,285556,27202,168090,84688,783,10753,100130873,838,147372,93233,129881,399693,885,6358,6362,6363,6368,1013,8941,1044,25790,317775,9071,1365,119467,1264,1271,1302,7373,81578,136227,1311,9384,1357,10814,1392,1393,1…	BP	GO:0048636	positive regulation of muscle organ development	0.0423551
CESC	8309,345651,72,171019,103689846,2015,124,131,1646,8854,218,251,115701,55018,203859,8862,440461,121549,220202,100128516,8313,8707,338707,285696,111216284,154442,118611,254439,114905,401115,285556,27202,168090,84688,783,10753,100130873,838,147372,93233,129881,399693,885,6358,6362,6363,6368,1013,8941,1044,25790,317775,9071,1365,119467,1264,1271,1302,7373,81578,136227,1311,9384,1357,10814,1392,1393,1…	BP	GO:0001963	synaptic transmission, dopaminergic	0.0423551
CESC	8309,345651,72,171019,103689846,2015,124,131,1646,8854,218,251,115701,55018,203859,8862,440461,121549,220202,100128516,8313,8707,338707,285696,111216284,154442,118611,254439,114905,401115,285556,27202,168090,84688,783,10753,100130873,838,147372,93233,129881,399693,885,6358,6362,6363,6368,1013,8941,1044,25790,317775,9071,1365,119467,1264,1271,1302,7373,81578,136227,1311,9384,1357,10814,1392,1393,1…	BP	GO:0003012	muscle system process	0.0423551
CESC	8309,345651,72,171019,103689846,2015,124,131,1646,8854,218,251,115701,55018,203859,8862,440461,121549,220202,100128516,8313,8707,338707,285696,111216284,154442,118611,254439,114905,401115,285556,27202,168090,84688,783,10753,100130873,838,147372,93233,129881,399693,885,6358,6362,6363,6368,1013,8941,1044,25790,317775,9071,1365,119467,1264,1271,1302,7373,81578,136227,1311,9384,1357,10814,1392,1393,1…	BP	GO:0007216	G protein-coupled glutamate receptor signaling pathway	0.0423551
CESC	8309,345651,72,171019,103689846,2015,124,131,1646,8854,218,251,115701,55018,203859,8862,440461,121549,220202,100128516,8313,8707,338707,285696,111216284,154442,118611,254439,114905,401115,285556,27202,168090,84688,783,10753,100130873,838,147372,93233,129881,399693,885,6358,6362,6363,6368,1013,8941,1044,25790,317775,9071,1365,119467,1264,1271,1302,7373,81578,136227,1311,9384,1357,10814,1392,1393,1…	BP	GO:0009855	determination of bilateral symmetry	0.0423551
CESC	8309,345651,72,171019,103689846,2015,124,131,1646,8854,218,251,115701,55018,203859,8862,440461,121549,220202,100128516,8313,8707,338707,285696,111216284,154442,118611,254439,114905,401115,285556,27202,168090,84688,783,10753,100130873,838,147372,93233,129881,399693,885,6358,6362,6363,6368,1013,8941,1044,25790,317775,9071,1365,119467,1264,1271,1302,7373,81578,136227,1311,9384,1357,10814,1392,1393,1…	BP	GO:0009799	specification of symmetry	0.0435131
CESC	8309,345651,72,171019,103689846,2015,124,131,1646,8854,218,251,115701,55018,203859,8862,440461,121549,220202,100128516,8313,8707,338707,285696,111216284,154442,118611,254439,114905,401115,285556,27202,168090,84688,783,10753,100130873,838,147372,93233,129881,399693,885,6358,6362,6363,6368,1013,8941,1044,25790,317775,9071,1365,119467,1264,1271,1302,7373,81578,136227,1311,9384,1357,10814,1392,1393,1…	BP	GO:0014033	neural crest cell differentiation	0.0435131
CESC	8309,345651,72,171019,103689846,2015,124,131,1646,8854,218,251,115701,55018,203859,8862,440461,121549,220202,100128516,8313,8707,338707,285696,111216284,154442,118611,254439,114905,401115,285556,27202,168090,84688,783,10753,100130873,838,147372,93233,129881,399693,885,6358,6362,6363,6368,1013,8941,1044,25790,317775,9071,1365,119467,1264,1271,1302,7373,81578,136227,1311,9384,1357,10814,1392,1393,1…	BP	GO:0035082	axoneme assembly	0.0435131
CESC	8309,345651,72,171019,103689846,2015,124,131,1646,8854,218,251,115701,55018,203859,8862,440461,121549,220202,100128516,8313,8707,338707,285696,111216284,154442,118611,254439,114905,401115,285556,27202,168090,84688,783,10753,100130873,838,147372,93233,129881,399693,885,6358,6362,6363,6368,1013,8941,1044,25790,317775,9071,1365,119467,1264,1271,1302,7373,81578,136227,1311,9384,1357,10814,1392,1393,1…	BP	GO:0007188	adenylate cyclase-modulating G protein-coupled receptor signaling pathway	0.0435131
CESC	8309,345651,72,171019,103689846,2015,124,131,1646,8854,218,251,115701,55018,203859,8862,440461,121549,220202,100128516,8313,8707,338707,285696,111216284,154442,118611,254439,114905,401115,285556,27202,168090,84688,783,10753,100130873,838,147372,93233,129881,399693,885,6358,6362,6363,6368,1013,8941,1044,25790,317775,9071,1365,119467,1264,1271,1302,7373,81578,136227,1311,9384,1357,10814,1392,1393,1…	BP	GO:0042738	exogenous drug catabolic process	0.0435131
CESC	8309,345651,72,171019,103689846,2015,124,131,1646,8854,218,251,115701,55018,203859,8862,440461,121549,220202,100128516,8313,8707,338707,285696,111216284,154442,118611,254439,114905,401115,285556,27202,168090,84688,783,10753,100130873,838,147372,93233,129881,399693,885,6358,6362,6363,6368,1013,8941,1044,25790,317775,9071,1365,119467,1264,1271,1302,7373,81578,136227,1311,9384,1357,10814,1392,1393,1…	BP	GO:0045472	response to ether	0.0435131
CESC	8309,345651,72,171019,103689846,2015,124,131,1646,8854,218,251,115701,55018,203859,8862,440461,121549,220202,100128516,8313,8707,338707,285696,111216284,154442,118611,254439,114905,401115,285556,27202,168090,84688,783,10753,100130873,838,147372,93233,129881,399693,885,6358,6362,6363,6368,1013,8941,1044,25790,317775,9071,1365,119467,1264,1271,1302,7373,81578,136227,1311,9384,1357,10814,1392,1393,1…	BP	GO:0055062	phosphate ion homeostasis	0.0435131
CESC	8309,345651,72,171019,103689846,2015,124,131,1646,8854,218,251,115701,55018,203859,8862,440461,121549,220202,100128516,8313,8707,338707,285696,111216284,154442,118611,254439,114905,401115,285556,27202,168090,84688,783,10753,100130873,838,147372,93233,129881,399693,885,6358,6362,6363,6368,1013,8941,1044,25790,317775,9071,1365,119467,1264,1271,1302,7373,81578,136227,1311,9384,1357,10814,1392,1393,1…	BP	GO:0072505	divalent inorganic anion homeostasis	0.0435131
CESC	8309,345651,72,171019,103689846,2015,124,131,1646,8854,218,251,115701,55018,203859,8862,440461,121549,220202,100128516,8313,8707,338707,285696,111216284,154442,118611,254439,114905,401115,285556,27202,168090,84688,783,10753,100130873,838,147372,93233,129881,399693,885,6358,6362,6363,6368,1013,8941,1044,25790,317775,9071,1365,119467,1264,1271,1302,7373,81578,136227,1311,9384,1357,10814,1392,1393,1…	BP	GO:0072506	trivalent inorganic anion homeostasis	0.0435131
CESC	8309,345651,72,171019,103689846,2015,124,131,1646,8854,218,251,115701,55018,203859,8862,440461,121549,220202,100128516,8313,8707,338707,285696,111216284,154442,118611,254439,114905,401115,285556,27202,168090,84688,783,10753,100130873,838,147372,93233,129881,399693,885,6358,6362,6363,6368,1013,8941,1044,25790,317775,9071,1365,119467,1264,1271,1302,7373,81578,136227,1311,9384,1357,10814,1392,1393,1…	BP	GO:0010171	body morphogenesis	0.0469366
CESC	8309,345651,72,171019,103689846,2015,124,131,1646,8854,218,251,115701,55018,203859,8862,440461,121549,220202,100128516,8313,8707,338707,285696,111216284,154442,118611,254439,114905,401115,285556,27202,168090,84688,783,10753,100130873,838,147372,93233,129881,399693,885,6358,6362,6363,6368,1013,8941,1044,25790,317775,9071,1365,119467,1264,1271,1302,7373,81578,136227,1311,9384,1357,10814,1392,1393,1…	BP	GO:0048565	digestive tract development	0.0469366
CESC	8309,345651,72,171019,103689846,2015,124,131,1646,8854,218,251,115701,55018,203859,8862,440461,121549,220202,100128516,8313,8707,338707,285696,111216284,154442,118611,254439,114905,401115,285556,27202,168090,84688,783,10753,100130873,838,147372,93233,129881,399693,885,6358,6362,6363,6368,1013,8941,1044,25790,317775,9071,1365,119467,1264,1271,1302,7373,81578,136227,1311,9384,1357,10814,1392,1393,1…	BP	GO:0048265	response to pain	0.0470635
CESC	8309,345651,72,171019,103689846,2015,124,131,1646,8854,218,251,115701,55018,203859,8862,440461,121549,220202,100128516,8313,8707,338707,285696,111216284,154442,118611,254439,114905,401115,285556,27202,168090,84688,783,10753,100130873,838,147372,93233,129881,399693,885,6358,6362,6363,6368,1013,8941,1044,25790,317775,9071,1365,119467,1264,1271,1302,7373,81578,136227,1311,9384,1357,10814,1392,1393,1…	BP	GO:0043627	response to estrogen	0.0480758
CESC	8309,345651,72,171019,103689846,2015,124,131,1646,8854,218,251,115701,55018,203859,8862,440461,121549,220202,100128516,8313,8707,338707,285696,111216284,154442,118611,254439,114905,401115,285556,27202,168090,84688,783,10753,100130873,838,147372,93233,129881,399693,885,6358,6362,6363,6368,1013,8941,1044,25790,317775,9071,1365,119467,1264,1271,1302,7373,81578,136227,1311,9384,1357,10814,1392,1393,1…	BP	GO:0030177	positive regulation of Wnt signaling pathway	0.0484045
CESC	8309,345651,72,171019,103689846,2015,124,131,1646,8854,218,251,115701,55018,203859,8862,440461,121549,220202,100128516,8313,8707,338707,285696,111216284,154442,118611,254439,114905,401115,285556,27202,168090,84688,783,10753,100130873,838,147372,93233,129881,399693,885,6358,6362,6363,6368,1013,8941,1044,25790,317775,9071,1365,119467,1264,1271,1302,7373,81578,136227,1311,9384,1357,10814,1392,1393,1…	BP	GO:0007494	midgut development	0.0493577
CESC	8309,345651,72,171019,103689846,2015,124,131,1646,8854,218,251,115701,55018,203859,8862,440461,121549,220202,100128516,8313,8707,338707,285696,111216284,154442,118611,254439,114905,401115,285556,27202,168090,84688,783,10753,100130873,838,147372,93233,129881,399693,885,6358,6362,6363,6368,1013,8941,1044,25790,317775,9071,1365,119467,1264,1271,1302,7373,81578,136227,1311,9384,1357,10814,1392,1393,1…	CC	GO:0031012	extracellular matrix	0.032755
CESC	8309,345651,72,171019,103689846,2015,124,131,1646,8854,218,251,115701,55018,203859,8862,440461,121549,220202,100128516,8313,8707,338707,285696,111216284,154442,118611,254439,114905,401115,285556,27202,168090,84688,783,10753,100130873,838,147372,93233,129881,399693,885,6358,6362,6363,6368,1013,8941,1044,25790,317775,9071,1365,119467,1264,1271,1302,7373,81578,136227,1311,9384,1357,10814,1392,1393,1…	CC	GO:0005581	collagen trimer	0.0488269
CESC	8309,345651,72,171019,103689846,2015,124,131,1646,8854,218,251,115701,55018,203859,8862,440461,121549,220202,100128516,8313,8707,338707,285696,111216284,154442,118611,254439,114905,401115,285556,27202,168090,84688,783,10753,100130873,838,147372,93233,129881,399693,885,6358,6362,6363,6368,1013,8941,1044,25790,317775,9071,1365,119467,1264,1271,1302,7373,81578,136227,1311,9384,1357,10814,1392,1393,1…	CC	GO:0044306	neuron projection terminus	0.0488269
CESC	8309,345651,72,171019,103689846,2015,124,131,1646,8854,218,251,115701,55018,203859,8862,440461,121549,220202,100128516,8313,8707,338707,285696,111216284,154442,118611,254439,114905,401115,285556,27202,168090,84688,783,10753,100130873,838,147372,93233,129881,399693,885,6358,6362,6363,6368,1013,8941,1044,25790,317775,9071,1365,119467,1264,1271,1302,7373,81578,136227,1311,9384,1357,10814,1392,1393,1…	MF	GO:0030545	receptor regulator activity	0.037852
CESC	8309,345651,72,171019,103689846,2015,124,131,1646,8854,218,251,115701,55018,203859,8862,440461,121549,220202,100128516,8313,8707,338707,285696,111216284,154442,118611,254439,114905,401115,285556,27202,168090,84688,783,10753,100130873,838,147372,93233,129881,399693,885,6358,6362,6363,6368,1013,8941,1044,25790,317775,9071,1365,119467,1264,1271,1302,7373,81578,136227,1311,9384,1357,10814,1392,1393,1…	MF	GO:0048018	receptor ligand activity	0.037852
CESC	8309,345651,72,171019,103689846,2015,124,131,1646,8854,218,251,115701,55018,203859,8862,440461,121549,220202,100128516,8313,8707,338707,285696,111216284,154442,118611,254439,114905,401115,285556,27202,168090,84688,783,10753,100130873,838,147372,93233,129881,399693,885,6358,6362,6363,6368,1013,8941,1044,25790,317775,9071,1365,119467,1264,1271,1302,7373,81578,136227,1311,9384,1357,10814,1392,1393,1…	MF	GO:0005201	extracellular matrix structural constituent	0.0442525
CESC	8309,345651,72,171019,103689846,2015,124,131,1646,8854,218,251,115701,55018,203859,8862,440461,121549,220202,100128516,8313,8707,338707,285696,111216284,154442,118611,254439,114905,401115,285556,27202,168090,84688,783,10753,100130873,838,147372,93233,129881,399693,885,6358,6362,6363,6368,1013,8941,1044,25790,317775,9071,1365,119467,1264,1271,1302,7373,81578,136227,1311,9384,1357,10814,1392,1393,1…	MF	GO:0008066	glutamate receptor activity	0.0442525
DLBC	51146,176,170487,11086,104,126,57016,22977,253650,84168,361,221481,645432,496,563,10331,55509,92747,387763,84419,79098,149466,145741,388125,352999,401546,92291,388743,10753,257062,23624,2694,399693,124093,6355,894,909,131450,1026,1084,27159,83539,9080,23601,129607,149111,79935,1358,55057,1510,284340,3577,3579,1544,1556,160518,1740,64446,10570,405753,1780,1937,387712,57669,2064,127254,131177,14577…	BP	GO:0016266	O-glycan processing	0.00166976
DLBC	51146,176,170487,11086,104,126,57016,22977,253650,84168,361,221481,645432,496,563,10331,55509,92747,387763,84419,79098,149466,145741,388125,352999,401546,92291,388743,10753,257062,23624,2694,399693,124093,6355,894,909,131450,1026,1084,27159,83539,9080,23601,129607,149111,79935,1358,55057,1510,284340,3577,3579,1544,1556,160518,1740,64446,10570,405753,1780,1937,387712,57669,2064,127254,131177,14577…	BP	GO:0007586	digestion	0.00511469
DLBC	51146,176,170487,11086,104,126,57016,22977,253650,84168,361,221481,645432,496,563,10331,55509,92747,387763,84419,79098,149466,145741,388125,352999,401546,92291,388743,10753,257062,23624,2694,399693,124093,6355,894,909,131450,1026,1084,27159,83539,9080,23601,129607,149111,79935,1358,55057,1510,284340,3577,3579,1544,1556,160518,1740,64446,10570,405753,1780,1937,387712,57669,2064,127254,131177,14577…	BP	GO:0006493	protein O-linked glycosylation	0.0351616
ESCA	126767,94160,653190,326268,390928,123876,2515,8745,11085,255926,8756,171019,400406,100507098,108,117,57211,648947,218,100421018,10218,100101938,554226,55107,344454,339,319,350,147429,362,363,158763,415,84913,477,100422469,157556,168620,391472,112401,106480285,100288948,339479,154442,282966,56673,124773,284546,114905,84281,102724231,722,133874,729,730,389649,100133204,85438,57863,440067,845,79820,…	BP	GO:0006959	humoral immune response	0.0355103
ESCA	126767,94160,653190,326268,390928,123876,2515,8745,11085,255926,8756,171019,400406,100507098,108,117,57211,648947,218,100421018,10218,100101938,554226,55107,344454,339,319,350,147429,362,363,158763,415,84913,477,100422469,157556,168620,391472,112401,106480285,100288948,339479,154442,282966,56673,124773,284546,114905,84281,102724231,722,133874,729,730,389649,100133204,85438,57863,440067,845,79820,…	CC	GO:0001533	cornified envelope	0.0471408
ESCA	126767,94160,653190,326268,390928,123876,2515,8745,11085,255926,8756,171019,400406,100507098,108,117,57211,648947,218,100421018,10218,100101938,554226,55107,344454,339,319,350,147429,362,363,158763,415,84913,477,100422469,157556,168620,391472,112401,106480285,100288948,339479,154442,282966,56673,124773,284546,114905,84281,102724231,722,133874,729,730,389649,100133204,85438,57863,440067,845,79820,…	CC	GO:1902495	transmembrane transporter complex	0.0494388
ESCA	126767,94160,653190,326268,390928,123876,2515,8745,11085,255926,8756,171019,400406,100507098,108,117,57211,648947,218,100421018,10218,100101938,554226,55107,344454,339,319,350,147429,362,363,158763,415,84913,477,100422469,157556,168620,391472,112401,106480285,100288948,339479,154442,282966,56673,124773,284546,114905,84281,102724231,722,133874,729,730,389649,100133204,85438,57863,440067,845,79820,…	CC	GO:0034703	cation channel complex	0.0494388
ESCA	126767,94160,653190,326268,390928,123876,2515,8745,11085,255926,8756,171019,400406,100507098,108,117,57211,648947,218,100421018,10218,100101938,554226,55107,344454,339,319,350,147429,362,363,158763,415,84913,477,100422469,157556,168620,391472,112401,106480285,100288948,339479,154442,282966,56673,124773,284546,114905,84281,102724231,722,133874,729,730,389649,100133204,85438,57863,440067,845,79820,…	CC	GO:1990351	transporter complex	0.0494388
ESCA	126767,94160,653190,326268,390928,123876,2515,8745,11085,255926,8756,171019,400406,100507098,108,117,57211,648947,218,100421018,10218,100101938,554226,55107,344454,339,319,350,147429,362,363,158763,415,84913,477,100422469,157556,168620,391472,112401,106480285,100288948,339479,154442,282966,56673,124773,284546,114905,84281,102724231,722,133874,729,730,389649,100133204,85438,57863,440067,845,79820,…	CC	GO:0034702	ion channel complex	0.0494388
ESCA	126767,94160,653190,326268,390928,123876,2515,8745,11085,255926,8756,171019,400406,100507098,108,117,57211,648947,218,100421018,10218,100101938,554226,55107,344454,339,319,350,147429,362,363,158763,415,84913,477,100422469,157556,168620,391472,112401,106480285,100288948,339479,154442,282966,56673,124773,284546,114905,84281,102724231,722,133874,729,730,389649,100133204,85438,57863,440067,845,79820,…	MF	GO:0015267	channel activity	0.0022878
ESCA	126767,94160,653190,326268,390928,123876,2515,8745,11085,255926,8756,171019,400406,100507098,108,117,57211,648947,218,100421018,10218,100101938,554226,55107,344454,339,319,350,147429,362,363,158763,415,84913,477,100422469,157556,168620,391472,112401,106480285,100288948,339479,154442,282966,56673,124773,284546,114905,84281,102724231,722,133874,729,730,389649,100133204,85438,57863,440067,845,79820,…	MF	GO:0022803	passive transmembrane transporter activity	0.0022878
ESCA	126767,94160,653190,326268,390928,123876,2515,8745,11085,255926,8756,171019,400406,100507098,108,117,57211,648947,218,100421018,10218,100101938,554226,55107,344454,339,319,350,147429,362,363,158763,415,84913,477,100422469,157556,168620,391472,112401,106480285,100288948,339479,154442,282966,56673,124773,284546,114905,84281,102724231,722,133874,729,730,389649,100133204,85438,57863,440067,845,79820,…	MF	GO:0022839	ion gated channel activity	0.00373602
ESCA	126767,94160,653190,326268,390928,123876,2515,8745,11085,255926,8756,171019,400406,100507098,108,117,57211,648947,218,100421018,10218,100101938,554226,55107,344454,339,319,350,147429,362,363,158763,415,84913,477,100422469,157556,168620,391472,112401,106480285,100288948,339479,154442,282966,56673,124773,284546,114905,84281,102724231,722,133874,729,730,389649,100133204,85438,57863,440067,845,79820,…	MF	GO:0022836	gated channel activity	0.00373602
ESCA	126767,94160,653190,326268,390928,123876,2515,8745,11085,255926,8756,171019,400406,100507098,108,117,57211,648947,218,100421018,10218,100101938,554226,55107,344454,339,319,350,147429,362,363,158763,415,84913,477,100422469,157556,168620,391472,112401,106480285,100288948,339479,154442,282966,56673,124773,284546,114905,84281,102724231,722,133874,729,730,389649,100133204,85438,57863,440067,845,79820,…	MF	GO:0008324	cation transmembrane transporter activity	0.00935716
ESCA	126767,94160,653190,326268,390928,123876,2515,8745,11085,255926,8756,171019,400406,100507098,108,117,57211,648947,218,100421018,10218,100101938,554226,55107,344454,339,319,350,147429,362,363,158763,415,84913,477,100422469,157556,168620,391472,112401,106480285,100288948,339479,154442,282966,56673,124773,284546,114905,84281,102724231,722,133874,729,730,389649,100133204,85438,57863,440067,845,79820,…	MF	GO:0022838	substrate-specific channel activity	0.00935716
ESCA	126767,94160,653190,326268,390928,123876,2515,8745,11085,255926,8756,171019,400406,100507098,108,117,57211,648947,218,100421018,10218,100101938,554226,55107,344454,339,319,350,147429,362,363,158763,415,84913,477,100422469,157556,168620,391472,112401,106480285,100288948,339479,154442,282966,56673,124773,284546,114905,84281,102724231,722,133874,729,730,389649,100133204,85438,57863,440067,845,79820,…	MF	GO:0022824	transmitter-gated ion channel activity	0.00966487
ESCA	126767,94160,653190,326268,390928,123876,2515,8745,11085,255926,8756,171019,400406,100507098,108,117,57211,648947,218,100421018,10218,100101938,554226,55107,344454,339,319,350,147429,362,363,158763,415,84913,477,100422469,157556,168620,391472,112401,106480285,100288948,339479,154442,282966,56673,124773,284546,114905,84281,102724231,722,133874,729,730,389649,100133204,85438,57863,440067,845,79820,…	MF	GO:0022835	transmitter-gated channel activity	0.00966487
ESCA	126767,94160,653190,326268,390928,123876,2515,8745,11085,255926,8756,171019,400406,100507098,108,117,57211,648947,218,100421018,10218,100101938,554226,55107,344454,339,319,350,147429,362,363,158763,415,84913,477,100422469,157556,168620,391472,112401,106480285,100288948,339479,154442,282966,56673,124773,284546,114905,84281,102724231,722,133874,729,730,389649,100133204,85438,57863,440067,845,79820,…	MF	GO:0005261	cation channel activity	0.00966487
ESCA	126767,94160,653190,326268,390928,123876,2515,8745,11085,255926,8756,171019,400406,100507098,108,117,57211,648947,218,100421018,10218,100101938,554226,55107,344454,339,319,350,147429,362,363,158763,415,84913,477,100422469,157556,168620,391472,112401,106480285,100288948,339479,154442,282966,56673,124773,284546,114905,84281,102724231,722,133874,729,730,389649,100133204,85438,57863,440067,845,79820,…	MF	GO:0005244	voltage-gated ion channel activity	0.00966487
ESCA	126767,94160,653190,326268,390928,123876,2515,8745,11085,255926,8756,171019,400406,100507098,108,117,57211,648947,218,100421018,10218,100101938,554226,55107,344454,339,319,350,147429,362,363,158763,415,84913,477,100422469,157556,168620,391472,112401,106480285,100288948,339479,154442,282966,56673,124773,284546,114905,84281,102724231,722,133874,729,730,389649,100133204,85438,57863,440067,845,79820,…	MF	GO:0022832	voltage-gated channel activity	0.00966487
ESCA	126767,94160,653190,326268,390928,123876,2515,8745,11085,255926,8756,171019,400406,100507098,108,117,57211,648947,218,100421018,10218,100101938,554226,55107,344454,339,319,350,147429,362,363,158763,415,84913,477,100422469,157556,168620,391472,112401,106480285,100288948,339479,154442,282966,56673,124773,284546,114905,84281,102724231,722,133874,729,730,389649,100133204,85438,57863,440067,845,79820,…	MF	GO:0017171	serine hydrolase activity	0.00966487
ESCA	126767,94160,653190,326268,390928,123876,2515,8745,11085,255926,8756,171019,400406,100507098,108,117,57211,648947,218,100421018,10218,100101938,554226,55107,344454,339,319,350,147429,362,363,158763,415,84913,477,100422469,157556,168620,391472,112401,106480285,100288948,339479,154442,282966,56673,124773,284546,114905,84281,102724231,722,133874,729,730,389649,100133204,85438,57863,440067,845,79820,…	MF	GO:0005216	ion channel activity	0.00966487
ESCA	126767,94160,653190,326268,390928,123876,2515,8745,11085,255926,8756,171019,400406,100507098,108,117,57211,648947,218,100421018,10218,100101938,554226,55107,344454,339,319,350,147429,362,363,158763,415,84913,477,100422469,157556,168620,391472,112401,106480285,100288948,339479,154442,282966,56673,124773,284546,114905,84281,102724231,722,133874,729,730,389649,100133204,85438,57863,440067,845,79820,…	MF	GO:0022890	inorganic cation transmembrane transporter activity	0.00966487
ESCA	126767,94160,653190,326268,390928,123876,2515,8745,11085,255926,8756,171019,400406,100507098,108,117,57211,648947,218,100421018,10218,100101938,554226,55107,344454,339,319,350,147429,362,363,158763,415,84913,477,100422469,157556,168620,391472,112401,106480285,100288948,339479,154442,282966,56673,124773,284546,114905,84281,102724231,722,133874,729,730,389649,100133204,85438,57863,440067,845,79820,…	MF	GO:0005230	extracellular ligand-gated ion channel activity	0.0132678
ESCA	126767,94160,653190,326268,390928,123876,2515,8745,11085,255926,8756,171019,400406,100507098,108,117,57211,648947,218,100421018,10218,100101938,554226,55107,344454,339,319,350,147429,362,363,158763,415,84913,477,100422469,157556,168620,391472,112401,106480285,100288948,339479,154442,282966,56673,124773,284546,114905,84281,102724231,722,133874,729,730,389649,100133204,85438,57863,440067,845,79820,…	MF	GO:0015276	ligand-gated ion channel activity	0.0132678
ESCA	126767,94160,653190,326268,390928,123876,2515,8745,11085,255926,8756,171019,400406,100507098,108,117,57211,648947,218,100421018,10218,100101938,554226,55107,344454,339,319,350,147429,362,363,158763,415,84913,477,100422469,157556,168620,391472,112401,106480285,100288948,339479,154442,282966,56673,124773,284546,114905,84281,102724231,722,133874,729,730,389649,100133204,85438,57863,440067,845,79820,…	MF	GO:0022834	ligand-gated channel activity	0.0132678
ESCA	126767,94160,653190,326268,390928,123876,2515,8745,11085,255926,8756,171019,400406,100507098,108,117,57211,648947,218,100421018,10218,100101938,554226,55107,344454,339,319,350,147429,362,363,158763,415,84913,477,100422469,157556,168620,391472,112401,106480285,100288948,339479,154442,282966,56673,124773,284546,114905,84281,102724231,722,133874,729,730,389649,100133204,85438,57863,440067,845,79820,…	MF	GO:0099094	ligand-gated cation channel activity	0.0159398
ESCA	126767,94160,653190,326268,390928,123876,2515,8745,11085,255926,8756,171019,400406,100507098,108,117,57211,648947,218,100421018,10218,100101938,554226,55107,344454,339,319,350,147429,362,363,158763,415,84913,477,100422469,157556,168620,391472,112401,106480285,100288948,339479,154442,282966,56673,124773,284546,114905,84281,102724231,722,133874,729,730,389649,100133204,85438,57863,440067,845,79820,…	MF	GO:0008236	serine-type peptidase activity	0.0225645
ESCA	126767,94160,653190,326268,390928,123876,2515,8745,11085,255926,8756,171019,400406,100507098,108,117,57211,648947,218,100421018,10218,100101938,554226,55107,344454,339,319,350,147429,362,363,158763,415,84913,477,100422469,157556,168620,391472,112401,106480285,100288948,339479,154442,282966,56673,124773,284546,114905,84281,102724231,722,133874,729,730,389649,100133204,85438,57863,440067,845,79820,…	MF	GO:0042834	peptidoglycan binding	0.0253805
ESCA	126767,94160,653190,326268,390928,123876,2515,8745,11085,255926,8756,171019,400406,100507098,108,117,57211,648947,218,100421018,10218,100101938,554226,55107,344454,339,319,350,147429,362,363,158763,415,84913,477,100422469,157556,168620,391472,112401,106480285,100288948,339479,154442,282966,56673,124773,284546,114905,84281,102724231,722,133874,729,730,389649,100133204,85438,57863,440067,845,79820,…	MF	GO:0046873	metal ion transmembrane transporter activity	0.0253805
ESCA	126767,94160,653190,326268,390928,123876,2515,8745,11085,255926,8756,171019,400406,100507098,108,117,57211,648947,218,100421018,10218,100101938,554226,55107,344454,339,319,350,147429,362,363,158763,415,84913,477,100422469,157556,168620,391472,112401,106480285,100288948,339479,154442,282966,56673,124773,284546,114905,84281,102724231,722,133874,729,730,389649,100133204,85438,57863,440067,845,79820,…	MF	GO:0004252	serine-type endopeptidase activity	0.0253805
ESCA	126767,94160,653190,326268,390928,123876,2515,8745,11085,255926,8756,171019,400406,100507098,108,117,57211,648947,218,100421018,10218,100101938,554226,55107,344454,339,319,350,147429,362,363,158763,415,84913,477,100422469,157556,168620,391472,112401,106480285,100288948,339479,154442,282966,56673,124773,284546,114905,84281,102724231,722,133874,729,730,389649,100133204,85438,57863,440067,845,79820,…	MF	GO:0048018	receptor ligand activity	0.035892
ESCA	126767,94160,653190,326268,390928,123876,2515,8745,11085,255926,8756,171019,400406,100507098,108,117,57211,648947,218,100421018,10218,100101938,554226,55107,344454,339,319,350,147429,362,363,158763,415,84913,477,100422469,157556,168620,391472,112401,106480285,100288948,339479,154442,282966,56673,124773,284546,114905,84281,102724231,722,133874,729,730,389649,100133204,85438,57863,440067,845,79820,…	MF	GO:0015079	potassium ion transmembrane transporter activity	0.035892
ESCA	126767,94160,653190,326268,390928,123876,2515,8745,11085,255926,8756,171019,400406,100507098,108,117,57211,648947,218,100421018,10218,100101938,554226,55107,344454,339,319,350,147429,362,363,158763,415,84913,477,100422469,157556,168620,391472,112401,106480285,100288948,339479,154442,282966,56673,124773,284546,114905,84281,102724231,722,133874,729,730,389649,100133204,85438,57863,440067,845,79820,…	MF	GO:0004175	endopeptidase activity	0.035892
ESCA	126767,94160,653190,326268,390928,123876,2515,8745,11085,255926,8756,171019,400406,100507098,108,117,57211,648947,218,100421018,10218,100101938,554226,55107,344454,339,319,350,147429,362,363,158763,415,84913,477,100422469,157556,168620,391472,112401,106480285,100288948,339479,154442,282966,56673,124773,284546,114905,84281,102724231,722,133874,729,730,389649,100133204,85438,57863,440067,845,79820,…	MF	GO:0030594	neurotransmitter receptor activity	0.0421499
ESCA	126767,94160,653190,326268,390928,123876,2515,8745,11085,255926,8756,171019,400406,100507098,108,117,57211,648947,218,100421018,10218,100101938,554226,55107,344454,339,319,350,147429,362,363,158763,415,84913,477,100422469,157556,168620,391472,112401,106480285,100288948,339479,154442,282966,56673,124773,284546,114905,84281,102724231,722,133874,729,730,389649,100133204,85438,57863,440067,845,79820,…	MF	GO:0004970	ionotropic glutamate receptor activity	0.0421499
ESCA	126767,94160,653190,326268,390928,123876,2515,8745,11085,255926,8756,171019,400406,100507098,108,117,57211,648947,218,100421018,10218,100101938,554226,55107,344454,339,319,350,147429,362,363,158763,415,84913,477,100422469,157556,168620,391472,112401,106480285,100288948,339479,154442,282966,56673,124773,284546,114905,84281,102724231,722,133874,729,730,389649,100133204,85438,57863,440067,845,79820,…	MF	GO:0004222	metalloendopeptidase activity	0.0423468
ESCA	126767,94160,653190,326268,390928,123876,2515,8745,11085,255926,8756,171019,400406,100507098,108,117,57211,648947,218,100421018,10218,100101938,554226,55107,344454,339,319,350,147429,362,363,158763,415,84913,477,100422469,157556,168620,391472,112401,106480285,100288948,339479,154442,282966,56673,124773,284546,114905,84281,102724231,722,133874,729,730,389649,100133204,85438,57863,440067,845,79820,…	MF	GO:0005251	delayed rectifier potassium channel activity	0.0460387
ESCA	126767,94160,653190,326268,390928,123876,2515,8745,11085,255926,8756,171019,400406,100507098,108,117,57211,648947,218,100421018,10218,100101938,554226,55107,344454,339,319,350,147429,362,363,158763,415,84913,477,100422469,157556,168620,391472,112401,106480285,100288948,339479,154442,282966,56673,124773,284546,114905,84281,102724231,722,133874,729,730,389649,100133204,85438,57863,440067,845,79820,…	MF	GO:0070851	growth factor receptor binding	0.0482519
ESCA	126767,94160,653190,326268,390928,123876,2515,8745,11085,255926,8756,171019,400406,100507098,108,117,57211,648947,218,100421018,10218,100101938,554226,55107,344454,339,319,350,147429,362,363,158763,415,84913,477,100422469,157556,168620,391472,112401,106480285,100288948,339479,154442,282966,56673,124773,284546,114905,84281,102724231,722,133874,729,730,389649,100133204,85438,57863,440067,845,79820,…	MF	GO:0030545	receptor regulator activity	0.0482519
HNSC	344752,21,10149,280,653436,100287718,398,219681,10033,491,100379249,317716,388419,341032,388701,257407,389336,134121,29113,253962,163688,440854,859,147381,8941,200373,94115,63924,9071,1365,440508,1047,399948,341947,286204,49860,8048,1510,1556,1571,1572,1618,54798,115265,1673,201140,1755,63946,1768,100628315,138971,92749,1812,84332,645311,102725541,101927125,133121,100144602,148753,51252,388882,10…	BP	GO:0006936	muscle contraction	0.00229107
HNSC	344752,21,10149,280,653436,100287718,398,219681,10033,491,100379249,317716,388419,341032,388701,257407,389336,134121,29113,253962,163688,440854,859,147381,8941,200373,94115,63924,9071,1365,440508,1047,399948,341947,286204,49860,8048,1510,1556,1571,1572,1618,54798,115265,1673,201140,1755,63946,1768,100628315,138971,92749,1812,84332,645311,102725541,101927125,133121,100144602,148753,51252,388882,10…	BP	GO:0003012	muscle system process	0.00253405
HNSC	344752,21,10149,280,653436,100287718,398,219681,10033,491,100379249,317716,388419,341032,388701,257407,389336,134121,29113,253962,163688,440854,859,147381,8941,200373,94115,63924,9071,1365,440508,1047,399948,341947,286204,49860,8048,1510,1556,1571,1572,1618,54798,115265,1673,201140,1755,63946,1768,100628315,138971,92749,1812,84332,645311,102725541,101927125,133121,100144602,148753,51252,388882,10…	BP	GO:0090257	regulation of muscle system process	0.0278438
HNSC	344752,21,10149,280,653436,100287718,398,219681,10033,491,100379249,317716,388419,341032,388701,257407,389336,134121,29113,253962,163688,440854,859,147381,8941,200373,94115,63924,9071,1365,440508,1047,399948,341947,286204,49860,8048,1510,1556,1571,1572,1618,54798,115265,1673,201140,1755,63946,1768,100628315,138971,92749,1812,84332,645311,102725541,101927125,133121,100144602,148753,51252,388882,10…	CC	GO:0043292	contractile fiber	0.00846343
HNSC	344752,21,10149,280,653436,100287718,398,219681,10033,491,100379249,317716,388419,341032,388701,257407,389336,134121,29113,253962,163688,440854,859,147381,8941,200373,94115,63924,9071,1365,440508,1047,399948,341947,286204,49860,8048,1510,1556,1571,1572,1618,54798,115265,1673,201140,1755,63946,1768,100628315,138971,92749,1812,84332,645311,102725541,101927125,133121,100144602,148753,51252,388882,10…	CC	GO:0030016	myofibril	0.0123286
HNSC	344752,21,10149,280,653436,100287718,398,219681,10033,491,100379249,317716,388419,341032,388701,257407,389336,134121,29113,253962,163688,440854,859,147381,8941,200373,94115,63924,9071,1365,440508,1047,399948,341947,286204,49860,8048,1510,1556,1571,1572,1618,54798,115265,1673,201140,1755,63946,1768,100628315,138971,92749,1812,84332,645311,102725541,101927125,133121,100144602,148753,51252,388882,10…	CC	GO:0030018	Z disc	0.0123286
HNSC	344752,21,10149,280,653436,100287718,398,219681,10033,491,100379249,317716,388419,341032,388701,257407,389336,134121,29113,253962,163688,440854,859,147381,8941,200373,94115,63924,9071,1365,440508,1047,399948,341947,286204,49860,8048,1510,1556,1571,1572,1618,54798,115265,1673,201140,1755,63946,1768,100628315,138971,92749,1812,84332,645311,102725541,101927125,133121,100144602,148753,51252,388882,10…	CC	GO:0031674	I band	0.0151314
HNSC	344752,21,10149,280,653436,100287718,398,219681,10033,491,100379249,317716,388419,341032,388701,257407,389336,134121,29113,253962,163688,440854,859,147381,8941,200373,94115,63924,9071,1365,440508,1047,399948,341947,286204,49860,8048,1510,1556,1571,1572,1618,54798,115265,1673,201140,1755,63946,1768,100628315,138971,92749,1812,84332,645311,102725541,101927125,133121,100144602,148753,51252,388882,10…	CC	GO:0030017	sarcomere	0.0177372
HNSC	344752,21,10149,280,653436,100287718,398,219681,10033,491,100379249,317716,388419,341032,388701,257407,389336,134121,29113,253962,163688,440854,859,147381,8941,200373,94115,63924,9071,1365,440508,1047,399948,341947,286204,49860,8048,1510,1556,1571,1572,1618,54798,115265,1673,201140,1755,63946,1768,100628315,138971,92749,1812,84332,645311,102725541,101927125,133121,100144602,148753,51252,388882,10…	CC	GO:0044449	contractile fiber part	0.0266163
KIRC	18,8647,51412,255926,170690,222611,727915,10551,189,23746,100128817,100129769,100874303,251,259,265,100421018,729171,374860,653145,164284,319,363,100874372,100996425,41,554235,460,285973,100289092,124496,9212,126859,100130402,157556,10409,388553,391472,112401,106480284,66037,100505383,254240,100422268,106481724,100141515,93190,286189,759,100420043,796,388743,378807,158506,126402,148870,220047,109…	CC	GO:0000786	nucleosome	0.00101082
KIRC	18,8647,51412,255926,170690,222611,727915,10551,189,23746,100128817,100129769,100874303,251,259,265,100421018,729171,374860,653145,164284,319,363,100874372,100996425,41,554235,460,285973,100289092,124496,9212,126859,100130402,157556,10409,388553,391472,112401,106480284,66037,100505383,254240,100422268,106481724,100141515,93190,286189,759,100420043,796,388743,378807,158506,126402,148870,220047,109…	CC	GO:0044815	DNA packaging complex	0.00101082
KIRC	18,8647,51412,255926,170690,222611,727915,10551,189,23746,100128817,100129769,100874303,251,259,265,100421018,729171,374860,653145,164284,319,363,100874372,100996425,41,554235,460,285973,100289092,124496,9212,126859,100130402,157556,10409,388553,391472,112401,106480284,66037,100505383,254240,100422268,106481724,100141515,93190,286189,759,100420043,796,388743,378807,158506,126402,148870,220047,109…	CC	GO:0000788	nuclear nucleosome	0.0224194
KIRC	18,8647,51412,255926,170690,222611,727915,10551,189,23746,100128817,100129769,100874303,251,259,265,100421018,729171,374860,653145,164284,319,363,100874372,100996425,41,554235,460,285973,100289092,124496,9212,126859,100130402,157556,10409,388553,391472,112401,106480284,66037,100505383,254240,100422268,106481724,100141515,93190,286189,759,100420043,796,388743,378807,158506,126402,148870,220047,109…	CC	GO:0032993	protein-DNA complex	0.033942
KIRC	18,8647,51412,255926,170690,222611,727915,10551,189,23746,100128817,100129769,100874303,251,259,265,100421018,729171,374860,653145,164284,319,363,100874372,100996425,41,554235,460,285973,100289092,124496,9212,126859,100130402,157556,10409,388553,391472,112401,106480284,66037,100505383,254240,100422268,106481724,100141515,93190,286189,759,100420043,796,388743,378807,158506,126402,148870,220047,109…	CC	GO:0000794	condensed nuclear chromosome	0.0400635
LAML	9625,25890,55289,9719,326342,64123,124,127,646114,213,216,217,59344,249,288,63926,253650,348840,102723552,440482,100652899,653145,728113,323,187,348,58504,100689073,9411,143872,64283,445328,100131629,379,641380,55616,57205,491,552,9531,105373509,103695435,4059,103344929,638,106480286,57795,79762,79098,713,10882,126567,285311,285668,100127983,759,100996348,100874234,100874370,784,23066,8436,91050,…	CC	GO:0031012	extracellular matrix	0.00616268
LAML	9625,25890,55289,9719,326342,64123,124,127,646114,213,216,217,59344,249,288,63926,253650,348840,102723552,440482,100652899,653145,728113,323,187,348,58504,100689073,9411,143872,64283,445328,100131629,379,641380,55616,57205,491,552,9531,105373509,103695435,4059,103344929,638,106480286,57795,79762,79098,713,10882,126567,285311,285668,100127983,759,100996348,100874234,100874370,784,23066,8436,91050,…	CC	GO:0062023	collagen-containing extracellular matrix	0.0112791
LAML	9625,25890,55289,9719,326342,64123,124,127,646114,213,216,217,59344,249,288,63926,253650,348840,102723552,440482,100652899,653145,728113,323,187,348,58504,100689073,9411,143872,64283,445328,100131629,379,641380,55616,57205,491,552,9531,105373509,103695435,4059,103344929,638,106480286,57795,79762,79098,713,10882,126567,285311,285668,100127983,759,100996348,100874234,100874370,784,23066,8436,91050,…	CC	GO:0005581	collagen trimer	0.0442853
LAML	9625,25890,55289,9719,326342,64123,124,127,646114,213,216,217,59344,249,288,63926,253650,348840,102723552,440482,100652899,653145,728113,323,187,348,58504,100689073,9411,143872,64283,445328,100131629,379,641380,55616,57205,491,552,9531,105373509,103695435,4059,103344929,638,106480286,57795,79762,79098,713,10882,126567,285311,285668,100127983,759,100996348,100874234,100874370,784,23066,8436,91050,…	CC	GO:0005614	interstitial matrix	0.0442853
LGG	107985353,26027,151,389658,100287718,375719,142689,107126287,701,399949,643037,128602,401335,116328,286189,761,8912,133690,151278,339184,6362,6349,414062,9560,10576,50489,255119,25790,149465,1142,1278,81578,1392,3627,6373,3576,164781,101929222,29947,53905,84417,2020,653316,105377486,144809,84624,146481,57818,2564,11227,2667,645367,2735,2825,80045,9293,283902,102723346,100129706,100506311,3199,320…	BP	GO:0001501	skeletal system development	0.0022705
LGG	107985353,26027,151,389658,100287718,375719,142689,107126287,701,399949,643037,128602,401335,116328,286189,761,8912,133690,151278,339184,6362,6349,414062,9560,10576,50489,255119,25790,149465,1142,1278,81578,1392,3627,6373,3576,164781,101929222,29947,53905,84417,2020,653316,105377486,144809,84624,146481,57818,2564,11227,2667,645367,2735,2825,80045,9293,283902,102723346,100129706,100506311,3199,320…	BP	GO:0048706	embryonic skeletal system development	0.00251954
LGG	107985353,26027,151,389658,100287718,375719,142689,107126287,701,399949,643037,128602,401335,116328,286189,761,8912,133690,151278,339184,6362,6349,414062,9560,10576,50489,255119,25790,149465,1142,1278,81578,1392,3627,6373,3576,164781,101929222,29947,53905,84417,2020,653316,105377486,144809,84624,146481,57818,2564,11227,2667,645367,2735,2825,80045,9293,283902,102723346,100129706,100506311,3199,320…	BP	GO:0007520	myoblast fusion	0.0160444
LGG	107985353,26027,151,389658,100287718,375719,142689,107126287,701,399949,643037,128602,401335,116328,286189,761,8912,133690,151278,339184,6362,6349,414062,9560,10576,50489,255119,25790,149465,1142,1278,81578,1392,3627,6373,3576,164781,101929222,29947,53905,84417,2020,653316,105377486,144809,84624,146481,57818,2564,11227,2667,645367,2735,2825,80045,9293,283902,102723346,100129706,100506311,3199,320…	BP	GO:0003002	regionalization	0.0160444
LGG	107985353,26027,151,389658,100287718,375719,142689,107126287,701,399949,643037,128602,401335,116328,286189,761,8912,133690,151278,339184,6362,6349,414062,9560,10576,50489,255119,25790,149465,1142,1278,81578,1392,3627,6373,3576,164781,101929222,29947,53905,84417,2020,653316,105377486,144809,84624,146481,57818,2564,11227,2667,645367,2735,2825,80045,9293,283902,102723346,100129706,100506311,3199,320…	BP	GO:0035270	endocrine system development	0.0160444
LGG	107985353,26027,151,389658,100287718,375719,142689,107126287,701,399949,643037,128602,401335,116328,286189,761,8912,133690,151278,339184,6362,6349,414062,9560,10576,50489,255119,25790,149465,1142,1278,81578,1392,3627,6373,3576,164781,101929222,29947,53905,84417,2020,653316,105377486,144809,84624,146481,57818,2564,11227,2667,645367,2735,2825,80045,9293,283902,102723346,100129706,100506311,3199,320…	BP	GO:0048704	embryonic skeletal system morphogenesis	0.0238099
LGG	107985353,26027,151,389658,100287718,375719,142689,107126287,701,399949,643037,128602,401335,116328,286189,761,8912,133690,151278,339184,6362,6349,414062,9560,10576,50489,255119,25790,149465,1142,1278,81578,1392,3627,6373,3576,164781,101929222,29947,53905,84417,2020,653316,105377486,144809,84624,146481,57818,2564,11227,2667,645367,2735,2825,80045,9293,283902,102723346,100129706,100506311,3199,320…	BP	GO:1901739	regulation of myoblast fusion	0.0238099
LGG	107985353,26027,151,389658,100287718,375719,142689,107126287,701,399949,643037,128602,401335,116328,286189,761,8912,133690,151278,339184,6362,6349,414062,9560,10576,50489,255119,25790,149465,1142,1278,81578,1392,3627,6373,3576,164781,101929222,29947,53905,84417,2020,653316,105377486,144809,84624,146481,57818,2564,11227,2667,645367,2735,2825,80045,9293,283902,102723346,100129706,100506311,3199,320…	BP	GO:0030902	hindbrain development	0.0238099
LGG	107985353,26027,151,389658,100287718,375719,142689,107126287,701,399949,643037,128602,401335,116328,286189,761,8912,133690,151278,339184,6362,6349,414062,9560,10576,50489,255119,25790,149465,1142,1278,81578,1392,3627,6373,3576,164781,101929222,29947,53905,84417,2020,653316,105377486,144809,84624,146481,57818,2564,11227,2667,645367,2735,2825,80045,9293,283902,102723346,100129706,100506311,3199,320…	BP	GO:0000768	syncytium formation by plasma membrane fusion	0.0238099
LGG	107985353,26027,151,389658,100287718,375719,142689,107126287,701,399949,643037,128602,401335,116328,286189,761,8912,133690,151278,339184,6362,6349,414062,9560,10576,50489,255119,25790,149465,1142,1278,81578,1392,3627,6373,3576,164781,101929222,29947,53905,84417,2020,653316,105377486,144809,84624,146481,57818,2564,11227,2667,645367,2735,2825,80045,9293,283902,102723346,100129706,100506311,3199,320…	BP	GO:0140253	cell-cell fusion	0.0238099
LGG	107985353,26027,151,389658,100287718,375719,142689,107126287,701,399949,643037,128602,401335,116328,286189,761,8912,133690,151278,339184,6362,6349,414062,9560,10576,50489,255119,25790,149465,1142,1278,81578,1392,3627,6373,3576,164781,101929222,29947,53905,84417,2020,653316,105377486,144809,84624,146481,57818,2564,11227,2667,645367,2735,2825,80045,9293,283902,102723346,100129706,100506311,3199,320…	BP	GO:0010830	regulation of myotube differentiation	0.0238099
LGG	107985353,26027,151,389658,100287718,375719,142689,107126287,701,399949,643037,128602,401335,116328,286189,761,8912,133690,151278,339184,6362,6349,414062,9560,10576,50489,255119,25790,149465,1142,1278,81578,1392,3627,6373,3576,164781,101929222,29947,53905,84417,2020,653316,105377486,144809,84624,146481,57818,2564,11227,2667,645367,2735,2825,80045,9293,283902,102723346,100129706,100506311,3199,320…	BP	GO:0006949	syncytium formation	0.0238099
LGG	107985353,26027,151,389658,100287718,375719,142689,107126287,701,399949,643037,128602,401335,116328,286189,761,8912,133690,151278,339184,6362,6349,414062,9560,10576,50489,255119,25790,149465,1142,1278,81578,1392,3627,6373,3576,164781,101929222,29947,53905,84417,2020,653316,105377486,144809,84624,146481,57818,2564,11227,2667,645367,2735,2825,80045,9293,283902,102723346,100129706,100506311,3199,320…	BP	GO:0014902	myotube differentiation	0.0238099
LGG	107985353,26027,151,389658,100287718,375719,142689,107126287,701,399949,643037,128602,401335,116328,286189,761,8912,133690,151278,339184,6362,6349,414062,9560,10576,50489,255119,25790,149465,1142,1278,81578,1392,3627,6373,3576,164781,101929222,29947,53905,84417,2020,653316,105377486,144809,84624,146481,57818,2564,11227,2667,645367,2735,2825,80045,9293,283902,102723346,100129706,100506311,3199,320…	BP	GO:0051146	striated muscle cell differentiation	0.0325447
LGG	107985353,26027,151,389658,100287718,375719,142689,107126287,701,399949,643037,128602,401335,116328,286189,761,8912,133690,151278,339184,6362,6349,414062,9560,10576,50489,255119,25790,149465,1142,1278,81578,1392,3627,6373,3576,164781,101929222,29947,53905,84417,2020,653316,105377486,144809,84624,146481,57818,2564,11227,2667,645367,2735,2825,80045,9293,283902,102723346,100129706,100506311,3199,320…	BP	GO:0010818	T cell chemotaxis	0.0325447
LGG	107985353,26027,151,389658,100287718,375719,142689,107126287,701,399949,643037,128602,401335,116328,286189,761,8912,133690,151278,339184,6362,6349,414062,9560,10576,50489,255119,25790,149465,1142,1278,81578,1392,3627,6373,3576,164781,101929222,29947,53905,84417,2020,653316,105377486,144809,84624,146481,57818,2564,11227,2667,645367,2735,2825,80045,9293,283902,102723346,100129706,100506311,3199,320…	BP	GO:0007389	pattern specification process	0.0325447
LGG	107985353,26027,151,389658,100287718,375719,142689,107126287,701,399949,643037,128602,401335,116328,286189,761,8912,133690,151278,339184,6362,6349,414062,9560,10576,50489,255119,25790,149465,1142,1278,81578,1392,3627,6373,3576,164781,101929222,29947,53905,84417,2020,653316,105377486,144809,84624,146481,57818,2564,11227,2667,645367,2735,2825,80045,9293,283902,102723346,100129706,100506311,3199,320…	BP	GO:0060142	regulation of syncytium formation by plasma membrane fusion	0.0336845
LGG	107985353,26027,151,389658,100287718,375719,142689,107126287,701,399949,643037,128602,401335,116328,286189,761,8912,133690,151278,339184,6362,6349,414062,9560,10576,50489,255119,25790,149465,1142,1278,81578,1392,3627,6373,3576,164781,101929222,29947,53905,84417,2020,653316,105377486,144809,84624,146481,57818,2564,11227,2667,645367,2735,2825,80045,9293,283902,102723346,100129706,100506311,3199,320…	BP	GO:0021602	cranial nerve morphogenesis	0.0356509
LGG	107985353,26027,151,389658,100287718,375719,142689,107126287,701,399949,643037,128602,401335,116328,286189,761,8912,133690,151278,339184,6362,6349,414062,9560,10576,50489,255119,25790,149465,1142,1278,81578,1392,3627,6373,3576,164781,101929222,29947,53905,84417,2020,653316,105377486,144809,84624,146481,57818,2564,11227,2667,645367,2735,2825,80045,9293,283902,102723346,100129706,100506311,3199,320…	BP	GO:0048732	gland development	0.0357273
LGG	107985353,26027,151,389658,100287718,375719,142689,107126287,701,399949,643037,128602,401335,116328,286189,761,8912,133690,151278,339184,6362,6349,414062,9560,10576,50489,255119,25790,149465,1142,1278,81578,1392,3627,6373,3576,164781,101929222,29947,53905,84417,2020,653316,105377486,144809,84624,146481,57818,2564,11227,2667,645367,2735,2825,80045,9293,283902,102723346,100129706,100506311,3199,320…	BP	GO:0010831	positive regulation of myotube differentiation	0.0397721
LGG	107985353,26027,151,389658,100287718,375719,142689,107126287,701,399949,643037,128602,401335,116328,286189,761,8912,133690,151278,339184,6362,6349,414062,9560,10576,50489,255119,25790,149465,1142,1278,81578,1392,3627,6373,3576,164781,101929222,29947,53905,84417,2020,653316,105377486,144809,84624,146481,57818,2564,11227,2667,645367,2735,2825,80045,9293,283902,102723346,100129706,100506311,3199,320…	BP	GO:0021675	nerve development	0.0464407
LGG	107985353,26027,151,389658,100287718,375719,142689,107126287,701,399949,643037,128602,401335,116328,286189,761,8912,133690,151278,339184,6362,6349,414062,9560,10576,50489,255119,25790,149465,1142,1278,81578,1392,3627,6373,3576,164781,101929222,29947,53905,84417,2020,653316,105377486,144809,84624,146481,57818,2564,11227,2667,645367,2735,2825,80045,9293,283902,102723346,100129706,100506311,3199,320…	MF	GO:0045236	CXCR chemokine receptor binding	0.00346016
LGG	107985353,26027,151,389658,100287718,375719,142689,107126287,701,399949,643037,128602,401335,116328,286189,761,8912,133690,151278,339184,6362,6349,414062,9560,10576,50489,255119,25790,149465,1142,1278,81578,1392,3627,6373,3576,164781,101929222,29947,53905,84417,2020,653316,105377486,144809,84624,146481,57818,2564,11227,2667,645367,2735,2825,80045,9293,283902,102723346,100129706,100506311,3199,320…	MF	GO:0001228	DNA-binding transcription activator activity, RNA polymerase II-specific	0.0198299
LGG	107985353,26027,151,389658,100287718,375719,142689,107126287,701,399949,643037,128602,401335,116328,286189,761,8912,133690,151278,339184,6362,6349,414062,9560,10576,50489,255119,25790,149465,1142,1278,81578,1392,3627,6373,3576,164781,101929222,29947,53905,84417,2020,653316,105377486,144809,84624,146481,57818,2564,11227,2667,645367,2735,2825,80045,9293,283902,102723346,100129706,100506311,3199,320…	MF	GO:0022839	ion gated channel activity	0.0217258
LGG	107985353,26027,151,389658,100287718,375719,142689,107126287,701,399949,643037,128602,401335,116328,286189,761,8912,133690,151278,339184,6362,6349,414062,9560,10576,50489,255119,25790,149465,1142,1278,81578,1392,3627,6373,3576,164781,101929222,29947,53905,84417,2020,653316,105377486,144809,84624,146481,57818,2564,11227,2667,645367,2735,2825,80045,9293,283902,102723346,100129706,100506311,3199,320…	MF	GO:0022836	gated channel activity	0.0217258
LGG	107985353,26027,151,389658,100287718,375719,142689,107126287,701,399949,643037,128602,401335,116328,286189,761,8912,133690,151278,339184,6362,6349,414062,9560,10576,50489,255119,25790,149465,1142,1278,81578,1392,3627,6373,3576,164781,101929222,29947,53905,84417,2020,653316,105377486,144809,84624,146481,57818,2564,11227,2667,645367,2735,2825,80045,9293,283902,102723346,100129706,100506311,3199,320…	MF	GO:0008009	chemokine activity	0.0217258
LGG	107985353,26027,151,389658,100287718,375719,142689,107126287,701,399949,643037,128602,401335,116328,286189,761,8912,133690,151278,339184,6362,6349,414062,9560,10576,50489,255119,25790,149465,1142,1278,81578,1392,3627,6373,3576,164781,101929222,29947,53905,84417,2020,653316,105377486,144809,84624,146481,57818,2564,11227,2667,645367,2735,2825,80045,9293,283902,102723346,100129706,100506311,3199,320…	MF	GO:0008188	neuropeptide receptor activity	0.0365127
LGG	107985353,26027,151,389658,100287718,375719,142689,107126287,701,399949,643037,128602,401335,116328,286189,761,8912,133690,151278,339184,6362,6349,414062,9560,10576,50489,255119,25790,149465,1142,1278,81578,1392,3627,6373,3576,164781,101929222,29947,53905,84417,2020,653316,105377486,144809,84624,146481,57818,2564,11227,2667,645367,2735,2825,80045,9293,283902,102723346,100129706,100506311,3199,320…	MF	GO:0005216	ion channel activity	0.0452459
LGG	107985353,26027,151,389658,100287718,375719,142689,107126287,701,399949,643037,128602,401335,116328,286189,761,8912,133690,151278,339184,6362,6349,414062,9560,10576,50489,255119,25790,149465,1142,1278,81578,1392,3627,6373,3576,164781,101929222,29947,53905,84417,2020,653316,105377486,144809,84624,146481,57818,2564,11227,2667,645367,2735,2825,80045,9293,283902,102723346,100129706,100506311,3199,320…	MF	GO:0022838	substrate-specific channel activity	0.0452459
LGG	107985353,26027,151,389658,100287718,375719,142689,107126287,701,399949,643037,128602,401335,116328,286189,761,8912,133690,151278,339184,6362,6349,414062,9560,10576,50489,255119,25790,149465,1142,1278,81578,1392,3627,6373,3576,164781,101929222,29947,53905,84417,2020,653316,105377486,144809,84624,146481,57818,2564,11227,2667,645367,2735,2825,80045,9293,283902,102723346,100129706,100506311,3199,320…	MF	GO:0042379	chemokine receptor binding	0.0452459
LUAD	650655,142827,100418920,100422407,103689846,100288319,391267,100874247,100132420,653145,80117,140456,100288307,10317,646201,400500,388553,347359,106481693,100421709,118611,387695,254439,283461,128653,246312,340073,203076,794,796,101929110,859,440184,344807,100129297,166979,1038,1041,1094,1057,646096,63924,1047,574016,7401,119467,101927465,414316,1421,389903,360180,1557,100996571,1617,646378,10087…	BP	GO:0006334	nucleosome assembly	6.16221e-25
LUAD	650655,142827,100418920,100422407,103689846,100288319,391267,100874247,100132420,653145,80117,140456,100288307,10317,646201,400500,388553,347359,106481693,100421709,118611,387695,254439,283461,128653,246312,340073,203076,794,796,101929110,859,440184,344807,100129297,166979,1038,1041,1094,1057,646096,63924,1047,574016,7401,119467,101927465,414316,1421,389903,360180,1557,100996571,1617,646378,10087…	BP	GO:0031497	chromatin assembly	1.27332e-23
LUAD	650655,142827,100418920,100422407,103689846,100288319,391267,100874247,100132420,653145,80117,140456,100288307,10317,646201,400500,388553,347359,106481693,100421709,118611,387695,254439,283461,128653,246312,340073,203076,794,796,101929110,859,440184,344807,100129297,166979,1038,1041,1094,1057,646096,63924,1047,574016,7401,119467,101927465,414316,1421,389903,360180,1557,100996571,1617,646378,10087…	BP	GO:0034728	nucleosome organization	6.48219e-23
LUAD	650655,142827,100418920,100422407,103689846,100288319,391267,100874247,100132420,653145,80117,140456,100288307,10317,646201,400500,388553,347359,106481693,100421709,118611,387695,254439,283461,128653,246312,340073,203076,794,796,101929110,859,440184,344807,100129297,166979,1038,1041,1094,1057,646096,63924,1047,574016,7401,119467,101927465,414316,1421,389903,360180,1557,100996571,1617,646378,10087…	BP	GO:0006323	DNA packaging	3.27145e-22
LUAD	650655,142827,100418920,100422407,103689846,100288319,391267,100874247,100132420,653145,80117,140456,100288307,10317,646201,400500,388553,347359,106481693,100421709,118611,387695,254439,283461,128653,246312,340073,203076,794,796,101929110,859,440184,344807,100129297,166979,1038,1041,1094,1057,646096,63924,1047,574016,7401,119467,101927465,414316,1421,389903,360180,1557,100996571,1617,646378,10087…	BP	GO:0006333	chromatin assembly or disassembly	4.1654e-22
LUAD	650655,142827,100418920,100422407,103689846,100288319,391267,100874247,100132420,653145,80117,140456,100288307,10317,646201,400500,388553,347359,106481693,100421709,118611,387695,254439,283461,128653,246312,340073,203076,794,796,101929110,859,440184,344807,100129297,166979,1038,1041,1094,1057,646096,63924,1047,574016,7401,119467,101927465,414316,1421,389903,360180,1557,100996571,1617,646378,10087…	BP	GO:0065004	protein-DNA complex assembly	3.33397e-20
LUAD	650655,142827,100418920,100422407,103689846,100288319,391267,100874247,100132420,653145,80117,140456,100288307,10317,646201,400500,388553,347359,106481693,100421709,118611,387695,254439,283461,128653,246312,340073,203076,794,796,101929110,859,440184,344807,100129297,166979,1038,1041,1094,1057,646096,63924,1047,574016,7401,119467,101927465,414316,1421,389903,360180,1557,100996571,1617,646378,10087…	BP	GO:0071824	protein-DNA complex subunit organization	1.06379e-18
LUAD	650655,142827,100418920,100422407,103689846,100288319,391267,100874247,100132420,653145,80117,140456,100288307,10317,646201,400500,388553,347359,106481693,100421709,118611,387695,254439,283461,128653,246312,340073,203076,794,796,101929110,859,440184,344807,100129297,166979,1038,1041,1094,1057,646096,63924,1047,574016,7401,119467,101927465,414316,1421,389903,360180,1557,100996571,1617,646378,10087…	BP	GO:0071103	DNA conformation change	5.76619e-18
LUAD	650655,142827,100418920,100422407,103689846,100288319,391267,100874247,100132420,653145,80117,140456,100288307,10317,646201,400500,388553,347359,106481693,100421709,118611,387695,254439,283461,128653,246312,340073,203076,794,796,101929110,859,440184,344807,100129297,166979,1038,1041,1094,1057,646096,63924,1047,574016,7401,119467,101927465,414316,1421,389903,360180,1557,100996571,1617,646378,10087…	BP	GO:0000183	chromatin silencing at rDNA	4.66195e-16
LUAD	650655,142827,100418920,100422407,103689846,100288319,391267,100874247,100132420,653145,80117,140456,100288307,10317,646201,400500,388553,347359,106481693,100421709,118611,387695,254439,283461,128653,246312,340073,203076,794,796,101929110,859,440184,344807,100129297,166979,1038,1041,1094,1057,646096,63924,1047,574016,7401,119467,101927465,414316,1421,389903,360180,1557,100996571,1617,646378,10087…	BP	GO:0006335	DNA replication-dependent nucleosome assembly	9.15426e-16
LUAD	650655,142827,100418920,100422407,103689846,100288319,391267,100874247,100132420,653145,80117,140456,100288307,10317,646201,400500,388553,347359,106481693,100421709,118611,387695,254439,283461,128653,246312,340073,203076,794,796,101929110,859,440184,344807,100129297,166979,1038,1041,1094,1057,646096,63924,1047,574016,7401,119467,101927465,414316,1421,389903,360180,1557,100996571,1617,646378,10087…	BP	GO:0034723	DNA replication-dependent nucleosome organization	9.15426e-16
LUAD	650655,142827,100418920,100422407,103689846,100288319,391267,100874247,100132420,653145,80117,140456,100288307,10317,646201,400500,388553,347359,106481693,100421709,118611,387695,254439,283461,128653,246312,340073,203076,794,796,101929110,859,440184,344807,100129297,166979,1038,1041,1094,1057,646096,63924,1047,574016,7401,119467,101927465,414316,1421,389903,360180,1557,100996571,1617,646378,10087…	BP	GO:0051290	protein heterotetramerization	1.66576e-12
LUAD	650655,142827,100418920,100422407,103689846,100288319,391267,100874247,100132420,653145,80117,140456,100288307,10317,646201,400500,388553,347359,106481693,100421709,118611,387695,254439,283461,128653,246312,340073,203076,794,796,101929110,859,440184,344807,100129297,166979,1038,1041,1094,1057,646096,63924,1047,574016,7401,119467,101927465,414316,1421,389903,360180,1557,100996571,1617,646378,10087…	BP	GO:0006342	chromatin silencing	1.69254e-11
LUAD	650655,142827,100418920,100422407,103689846,100288319,391267,100874247,100132420,653145,80117,140456,100288307,10317,646201,400500,388553,347359,106481693,100421709,118611,387695,254439,283461,128653,246312,340073,203076,794,796,101929110,859,440184,344807,100129297,166979,1038,1041,1094,1057,646096,63924,1047,574016,7401,119467,101927465,414316,1421,389903,360180,1557,100996571,1617,646378,10087…	BP	GO:0045652	regulation of megakaryocyte differentiation	1.69254e-11
LUAD	650655,142827,100418920,100422407,103689846,100288319,391267,100874247,100132420,653145,80117,140456,100288307,10317,646201,400500,388553,347359,106481693,100421709,118611,387695,254439,283461,128653,246312,340073,203076,794,796,101929110,859,440184,344807,100129297,166979,1038,1041,1094,1057,646096,63924,1047,574016,7401,119467,101927465,414316,1421,389903,360180,1557,100996571,1617,646378,10087…	BP	GO:0060147	regulation of posttranscriptional gene silencing	1.81657e-10
LUAD	650655,142827,100418920,100422407,103689846,100288319,391267,100874247,100132420,653145,80117,140456,100288307,10317,646201,400500,388553,347359,106481693,100421709,118611,387695,254439,283461,128653,246312,340073,203076,794,796,101929110,859,440184,344807,100129297,166979,1038,1041,1094,1057,646096,63924,1047,574016,7401,119467,101927465,414316,1421,389903,360180,1557,100996571,1617,646378,10087…	BP	GO:0060966	regulation of gene silencing by RNA	1.81657e-10
LUAD	650655,142827,100418920,100422407,103689846,100288319,391267,100874247,100132420,653145,80117,140456,100288307,10317,646201,400500,388553,347359,106481693,100421709,118611,387695,254439,283461,128653,246312,340073,203076,794,796,101929110,859,440184,344807,100129297,166979,1038,1041,1094,1057,646096,63924,1047,574016,7401,119467,101927465,414316,1421,389903,360180,1557,100996571,1617,646378,10087…	BP	GO:0030219	megakaryocyte differentiation	2.28197e-10
LUAD	650655,142827,100418920,100422407,103689846,100288319,391267,100874247,100132420,653145,80117,140456,100288307,10317,646201,400500,388553,347359,106481693,100421709,118611,387695,254439,283461,128653,246312,340073,203076,794,796,101929110,859,440184,344807,100129297,166979,1038,1041,1094,1057,646096,63924,1047,574016,7401,119467,101927465,414316,1421,389903,360180,1557,100996571,1617,646378,10087…	BP	GO:0045814	negative regulation of gene expression, epigenetic	2.49497e-10
LUAD	650655,142827,100418920,100422407,103689846,100288319,391267,100874247,100132420,653145,80117,140456,100288307,10317,646201,400500,388553,347359,106481693,100421709,118611,387695,254439,283461,128653,246312,340073,203076,794,796,101929110,859,440184,344807,100129297,166979,1038,1041,1094,1057,646096,63924,1047,574016,7401,119467,101927465,414316,1421,389903,360180,1557,100996571,1617,646378,10087…	BP	GO:0060964	regulation of gene silencing by miRNA	1.55608e-09
LUAD	650655,142827,100418920,100422407,103689846,100288319,391267,100874247,100132420,653145,80117,140456,100288307,10317,646201,400500,388553,347359,106481693,100421709,118611,387695,254439,283461,128653,246312,340073,203076,794,796,101929110,859,440184,344807,100129297,166979,1038,1041,1094,1057,646096,63924,1047,574016,7401,119467,101927465,414316,1421,389903,360180,1557,100996571,1617,646378,10087…	BP	GO:0060968	regulation of gene silencing	1.75791e-09
LUAD	650655,142827,100418920,100422407,103689846,100288319,391267,100874247,100132420,653145,80117,140456,100288307,10317,646201,400500,388553,347359,106481693,100421709,118611,387695,254439,283461,128653,246312,340073,203076,794,796,101929110,859,440184,344807,100129297,166979,1038,1041,1094,1057,646096,63924,1047,574016,7401,119467,101927465,414316,1421,389903,360180,1557,100996571,1617,646378,10087…	BP	GO:0035194	posttranscriptional gene silencing by RNA	6.32607e-09
LUAD	650655,142827,100418920,100422407,103689846,100288319,391267,100874247,100132420,653145,80117,140456,100288307,10317,646201,400500,388553,347359,106481693,100421709,118611,387695,254439,283461,128653,246312,340073,203076,794,796,101929110,859,440184,344807,100129297,166979,1038,1041,1094,1057,646096,63924,1047,574016,7401,119467,101927465,414316,1421,389903,360180,1557,100996571,1617,646378,10087…	BP	GO:0016441	posttranscriptional gene silencing	6.65118e-09
LUAD	650655,142827,100418920,100422407,103689846,100288319,391267,100874247,100132420,653145,80117,140456,100288307,10317,646201,400500,388553,347359,106481693,100421709,118611,387695,254439,283461,128653,246312,340073,203076,794,796,101929110,859,440184,344807,100129297,166979,1038,1041,1094,1057,646096,63924,1047,574016,7401,119467,101927465,414316,1421,389903,360180,1557,100996571,1617,646378,10087…	BP	GO:0051291	protein heterooligomerization	9.05119e-09
LUAD	650655,142827,100418920,100422407,103689846,100288319,391267,100874247,100132420,653145,80117,140456,100288307,10317,646201,400500,388553,347359,106481693,100421709,118611,387695,254439,283461,128653,246312,340073,203076,794,796,101929110,859,440184,344807,100129297,166979,1038,1041,1094,1057,646096,63924,1047,574016,7401,119467,101927465,414316,1421,389903,360180,1557,100996571,1617,646378,10087…	BP	GO:0045653	negative regulation of megakaryocyte differentiation	3.33575e-08
LUAD	650655,142827,100418920,100422407,103689846,100288319,391267,100874247,100132420,653145,80117,140456,100288307,10317,646201,400500,388553,347359,106481693,100421709,118611,387695,254439,283461,128653,246312,340073,203076,794,796,101929110,859,440184,344807,100129297,166979,1038,1041,1094,1057,646096,63924,1047,574016,7401,119467,101927465,414316,1421,389903,360180,1557,100996571,1617,646378,10087…	BP	GO:0035195	gene silencing by miRNA	3.69172e-08
LUAD	650655,142827,100418920,100422407,103689846,100288319,391267,100874247,100132420,653145,80117,140456,100288307,10317,646201,400500,388553,347359,106481693,100421709,118611,387695,254439,283461,128653,246312,340073,203076,794,796,101929110,859,440184,344807,100129297,166979,1038,1041,1094,1057,646096,63924,1047,574016,7401,119467,101927465,414316,1421,389903,360180,1557,100996571,1617,646378,10087…	BP	GO:0031047	gene silencing by RNA	3.97129e-08
LUAD	650655,142827,100418920,100422407,103689846,100288319,391267,100874247,100132420,653145,80117,140456,100288307,10317,646201,400500,388553,347359,106481693,100421709,118611,387695,254439,283461,128653,246312,340073,203076,794,796,101929110,859,440184,344807,100129297,166979,1038,1041,1094,1057,646096,63924,1047,574016,7401,119467,101927465,414316,1421,389903,360180,1557,100996571,1617,646378,10087…	BP	GO:0032200	telomere organization	2.43561e-07
LUAD	650655,142827,100418920,100422407,103689846,100288319,391267,100874247,100132420,653145,80117,140456,100288307,10317,646201,400500,388553,347359,106481693,100421709,118611,387695,254439,283461,128653,246312,340073,203076,794,796,101929110,859,440184,344807,100129297,166979,1038,1041,1094,1057,646096,63924,1047,574016,7401,119467,101927465,414316,1421,389903,360180,1557,100996571,1617,646378,10087…	BP	GO:0038111	interleukin-7-mediated signaling pathway	1.26671e-06
LUAD	650655,142827,100418920,100422407,103689846,100288319,391267,100874247,100132420,653145,80117,140456,100288307,10317,646201,400500,388553,347359,106481693,100421709,118611,387695,254439,283461,128653,246312,340073,203076,794,796,101929110,859,440184,344807,100129297,166979,1038,1041,1094,1057,646096,63924,1047,574016,7401,119467,101927465,414316,1421,389903,360180,1557,100996571,1617,646378,10087…	BP	GO:0016458	gene silencing	1.8192e-06
LUAD	650655,142827,100418920,100422407,103689846,100288319,391267,100874247,100132420,653145,80117,140456,100288307,10317,646201,400500,388553,347359,106481693,100421709,118611,387695,254439,283461,128653,246312,340073,203076,794,796,101929110,859,440184,344807,100129297,166979,1038,1041,1094,1057,646096,63924,1047,574016,7401,119467,101927465,414316,1421,389903,360180,1557,100996571,1617,646378,10087…	BP	GO:0051262	protein tetramerization	1.8192e-06
LUAD	650655,142827,100418920,100422407,103689846,100288319,391267,100874247,100132420,653145,80117,140456,100288307,10317,646201,400500,388553,347359,106481693,100421709,118611,387695,254439,283461,128653,246312,340073,203076,794,796,101929110,859,440184,344807,100129297,166979,1038,1041,1094,1057,646096,63924,1047,574016,7401,119467,101927465,414316,1421,389903,360180,1557,100996571,1617,646378,10087…	BP	GO:0061844	antimicrobial humoral immune response mediated by antimicrobial peptide	6.40759e-06
LUAD	650655,142827,100418920,100422407,103689846,100288319,391267,100874247,100132420,653145,80117,140456,100288307,10317,646201,400500,388553,347359,106481693,100421709,118611,387695,254439,283461,128653,246312,340073,203076,794,796,101929110,859,440184,344807,100129297,166979,1038,1041,1094,1057,646096,63924,1047,574016,7401,119467,101927465,414316,1421,389903,360180,1557,100996571,1617,646378,10087…	BP	GO:0098760	response to interleukin-7	1.15984e-05
LUAD	650655,142827,100418920,100422407,103689846,100288319,391267,100874247,100132420,653145,80117,140456,100288307,10317,646201,400500,388553,347359,106481693,100421709,118611,387695,254439,283461,128653,246312,340073,203076,794,796,101929110,859,440184,344807,100129297,166979,1038,1041,1094,1057,646096,63924,1047,574016,7401,119467,101927465,414316,1421,389903,360180,1557,100996571,1617,646378,10087…	BP	GO:0098761	cellular response to interleukin-7	1.15984e-05
LUAD	650655,142827,100418920,100422407,103689846,100288319,391267,100874247,100132420,653145,80117,140456,100288307,10317,646201,400500,388553,347359,106481693,100421709,118611,387695,254439,283461,128653,246312,340073,203076,794,796,101929110,859,440184,344807,100129297,166979,1038,1041,1094,1057,646096,63924,1047,574016,7401,119467,101927465,414316,1421,389903,360180,1557,100996571,1617,646378,10087…	BP	GO:0034080	CENP-A containing nucleosome assembly	1.55351e-05
LUAD	650655,142827,100418920,100422407,103689846,100288319,391267,100874247,100132420,653145,80117,140456,100288307,10317,646201,400500,388553,347359,106481693,100421709,118611,387695,254439,283461,128653,246312,340073,203076,794,796,101929110,859,440184,344807,100129297,166979,1038,1041,1094,1057,646096,63924,1047,574016,7401,119467,101927465,414316,1421,389903,360180,1557,100996571,1617,646378,10087…	BP	GO:0061641	CENP-A containing chromatin organization	1.55351e-05
LUAD	650655,142827,100418920,100422407,103689846,100288319,391267,100874247,100132420,653145,80117,140456,100288307,10317,646201,400500,388553,347359,106481693,100421709,118611,387695,254439,283461,128653,246312,340073,203076,794,796,101929110,859,440184,344807,100129297,166979,1038,1041,1094,1057,646096,63924,1047,574016,7401,119467,101927465,414316,1421,389903,360180,1557,100996571,1617,646378,10087…	BP	GO:0045637	regulation of myeloid cell differentiation	2.08406e-05
LUAD	650655,142827,100418920,100422407,103689846,100288319,391267,100874247,100132420,653145,80117,140456,100288307,10317,646201,400500,388553,347359,106481693,100421709,118611,387695,254439,283461,128653,246312,340073,203076,794,796,101929110,859,440184,344807,100129297,166979,1038,1041,1094,1057,646096,63924,1047,574016,7401,119467,101927465,414316,1421,389903,360180,1557,100996571,1617,646378,10087…	BP	GO:0040029	regulation of gene expression, epigenetic	2.60488e-05
LUAD	650655,142827,100418920,100422407,103689846,100288319,391267,100874247,100132420,653145,80117,140456,100288307,10317,646201,400500,388553,347359,106481693,100421709,118611,387695,254439,283461,128653,246312,340073,203076,794,796,101929110,859,440184,344807,100129297,166979,1038,1041,1094,1057,646096,63924,1047,574016,7401,119467,101927465,414316,1421,389903,360180,1557,100996571,1617,646378,10087…	BP	GO:0031055	chromatin remodeling at centromere	2.73598e-05
LUAD	650655,142827,100418920,100422407,103689846,100288319,391267,100874247,100132420,653145,80117,140456,100288307,10317,646201,400500,388553,347359,106481693,100421709,118611,387695,254439,283461,128653,246312,340073,203076,794,796,101929110,859,440184,344807,100129297,166979,1038,1041,1094,1057,646096,63924,1047,574016,7401,119467,101927465,414316,1421,389903,360180,1557,100996571,1617,646378,10087…	BP	GO:0006336	DNA replication-independent nucleosome assembly	6.84628e-05
LUAD	650655,142827,100418920,100422407,103689846,100288319,391267,100874247,100132420,653145,80117,140456,100288307,10317,646201,400500,388553,347359,106481693,100421709,118611,387695,254439,283461,128653,246312,340073,203076,794,796,101929110,859,440184,344807,100129297,166979,1038,1041,1094,1057,646096,63924,1047,574016,7401,119467,101927465,414316,1421,389903,360180,1557,100996571,1617,646378,10087…	BP	GO:0016233	telomere capping	6.84628e-05
LUAD	650655,142827,100418920,100422407,103689846,100288319,391267,100874247,100132420,653145,80117,140456,100288307,10317,646201,400500,388553,347359,106481693,100421709,118611,387695,254439,283461,128653,246312,340073,203076,794,796,101929110,859,440184,344807,100129297,166979,1038,1041,1094,1057,646096,63924,1047,574016,7401,119467,101927465,414316,1421,389903,360180,1557,100996571,1617,646378,10087…	BP	GO:0034724	DNA replication-independent nucleosome organization	6.84628e-05
LUAD	650655,142827,100418920,100422407,103689846,100288319,391267,100874247,100132420,653145,80117,140456,100288307,10317,646201,400500,388553,347359,106481693,100421709,118611,387695,254439,283461,128653,246312,340073,203076,794,796,101929110,859,440184,344807,100129297,166979,1038,1041,1094,1057,646096,63924,1047,574016,7401,119467,101927465,414316,1421,389903,360180,1557,100996571,1617,646378,10087…	BP	GO:0034508	centromere complex assembly	7.43128e-05
LUAD	650655,142827,100418920,100422407,103689846,100288319,391267,100874247,100132420,653145,80117,140456,100288307,10317,646201,400500,388553,347359,106481693,100421709,118611,387695,254439,283461,128653,246312,340073,203076,794,796,101929110,859,440184,344807,100129297,166979,1038,1041,1094,1057,646096,63924,1047,574016,7401,119467,101927465,414316,1421,389903,360180,1557,100996571,1617,646378,10087…	BP	GO:0043486	histone exchange	7.43128e-05
LUAD	650655,142827,100418920,100422407,103689846,100288319,391267,100874247,100132420,653145,80117,140456,100288307,10317,646201,400500,388553,347359,106481693,100421709,118611,387695,254439,283461,128653,246312,340073,203076,794,796,101929110,859,440184,344807,100129297,166979,1038,1041,1094,1057,646096,63924,1047,574016,7401,119467,101927465,414316,1421,389903,360180,1557,100996571,1617,646378,10087…	BP	GO:0002227	innate immune response in mucosa	9.89445e-05
LUAD	650655,142827,100418920,100422407,103689846,100288319,391267,100874247,100132420,653145,80117,140456,100288307,10317,646201,400500,388553,347359,106481693,100421709,118611,387695,254439,283461,128653,246312,340073,203076,794,796,101929110,859,440184,344807,100129297,166979,1038,1041,1094,1057,646096,63924,1047,574016,7401,119467,101927465,414316,1421,389903,360180,1557,100996571,1617,646378,10087…	BP	GO:0050830	defense response to Gram-positive bacterium	0.000152981
LUAD	650655,142827,100418920,100422407,103689846,100288319,391267,100874247,100132420,653145,80117,140456,100288307,10317,646201,400500,388553,347359,106481693,100421709,118611,387695,254439,283461,128653,246312,340073,203076,794,796,101929110,859,440184,344807,100129297,166979,1038,1041,1094,1057,646096,63924,1047,574016,7401,119467,101927465,414316,1421,389903,360180,1557,100996571,1617,646378,10087…	BP	GO:0006303	double-strand break repair via nonhomologous end joining	0.000685427
LUAD	650655,142827,100418920,100422407,103689846,100288319,391267,100874247,100132420,653145,80117,140456,100288307,10317,646201,400500,388553,347359,106481693,100421709,118611,387695,254439,283461,128653,246312,340073,203076,794,796,101929110,859,440184,344807,100129297,166979,1038,1041,1094,1057,646096,63924,1047,574016,7401,119467,101927465,414316,1421,389903,360180,1557,100996571,1617,646378,10087…	BP	GO:0043044	ATP-dependent chromatin remodeling	0.000685427
LUAD	650655,142827,100418920,100422407,103689846,100288319,391267,100874247,100132420,653145,80117,140456,100288307,10317,646201,400500,388553,347359,106481693,100421709,118611,387695,254439,283461,128653,246312,340073,203076,794,796,101929110,859,440184,344807,100129297,166979,1038,1041,1094,1057,646096,63924,1047,574016,7401,119467,101927465,414316,1421,389903,360180,1557,100996571,1617,646378,10087…	BP	GO:0019730	antimicrobial humoral response	0.000690008
LUAD	650655,142827,100418920,100422407,103689846,100288319,391267,100874247,100132420,653145,80117,140456,100288307,10317,646201,400500,388553,347359,106481693,100421709,118611,387695,254439,283461,128653,246312,340073,203076,794,796,101929110,859,440184,344807,100129297,166979,1038,1041,1094,1057,646096,63924,1047,574016,7401,119467,101927465,414316,1421,389903,360180,1557,100996571,1617,646378,10087…	BP	GO:0002385	mucosal immune response	0.000797417
LUAD	650655,142827,100418920,100422407,103689846,100288319,391267,100874247,100132420,653145,80117,140456,100288307,10317,646201,400500,388553,347359,106481693,100421709,118611,387695,254439,283461,128653,246312,340073,203076,794,796,101929110,859,440184,344807,100129297,166979,1038,1041,1094,1057,646096,63924,1047,574016,7401,119467,101927465,414316,1421,389903,360180,1557,100996571,1617,646378,10087…	BP	GO:0070268	cornification	0.00105859
LUAD	650655,142827,100418920,100422407,103689846,100288319,391267,100874247,100132420,653145,80117,140456,100288307,10317,646201,400500,388553,347359,106481693,100421709,118611,387695,254439,283461,128653,246312,340073,203076,794,796,101929110,859,440184,344807,100129297,166979,1038,1041,1094,1057,646096,63924,1047,574016,7401,119467,101927465,414316,1421,389903,360180,1557,100996571,1617,646378,10087…	BP	GO:0002251	organ or tissue specific immune response	0.00119256
LUAD	650655,142827,100418920,100422407,103689846,100288319,391267,100874247,100132420,653145,80117,140456,100288307,10317,646201,400500,388553,347359,106481693,100421709,118611,387695,254439,283461,128653,246312,340073,203076,794,796,101929110,859,440184,344807,100129297,166979,1038,1041,1094,1057,646096,63924,1047,574016,7401,119467,101927465,414316,1421,389903,360180,1557,100996571,1617,646378,10087…	BP	GO:0000726	non-recombinational repair	0.00119256
LUAD	650655,142827,100418920,100422407,103689846,100288319,391267,100874247,100132420,653145,80117,140456,100288307,10317,646201,400500,388553,347359,106481693,100421709,118611,387695,254439,283461,128653,246312,340073,203076,794,796,101929110,859,440184,344807,100129297,166979,1038,1041,1094,1057,646096,63924,1047,574016,7401,119467,101927465,414316,1421,389903,360180,1557,100996571,1617,646378,10087…	BP	GO:0045638	negative regulation of myeloid cell differentiation	0.00170007
LUAD	650655,142827,100418920,100422407,103689846,100288319,391267,100874247,100132420,653145,80117,140456,100288307,10317,646201,400500,388553,347359,106481693,100421709,118611,387695,254439,283461,128653,246312,340073,203076,794,796,101929110,859,440184,344807,100129297,166979,1038,1041,1094,1057,646096,63924,1047,574016,7401,119467,101927465,414316,1421,389903,360180,1557,100996571,1617,646378,10087…	BP	GO:0019731	antibacterial humoral response	0.00350869
LUAD	650655,142827,100418920,100422407,103689846,100288319,391267,100874247,100132420,653145,80117,140456,100288307,10317,646201,400500,388553,347359,106481693,100421709,118611,387695,254439,283461,128653,246312,340073,203076,794,796,101929110,859,440184,344807,100129297,166979,1038,1041,1094,1057,646096,63924,1047,574016,7401,119467,101927465,414316,1421,389903,360180,1557,100996571,1617,646378,10087…	BP	GO:0030099	myeloid cell differentiation	0.00436315
LUAD	650655,142827,100418920,100422407,103689846,100288319,391267,100874247,100132420,653145,80117,140456,100288307,10317,646201,400500,388553,347359,106481693,100421709,118611,387695,254439,283461,128653,246312,340073,203076,794,796,101929110,859,440184,344807,100129297,166979,1038,1041,1094,1057,646096,63924,1047,574016,7401,119467,101927465,414316,1421,389903,360180,1557,100996571,1617,646378,10087…	BP	GO:0000723	telomere maintenance	0.00840709
LUAD	650655,142827,100418920,100422407,103689846,100288319,391267,100874247,100132420,653145,80117,140456,100288307,10317,646201,400500,388553,347359,106481693,100421709,118611,387695,254439,283461,128653,246312,340073,203076,794,796,101929110,859,440184,344807,100129297,166979,1038,1041,1094,1057,646096,63924,1047,574016,7401,119467,101927465,414316,1421,389903,360180,1557,100996571,1617,646378,10087…	BP	GO:1903706	regulation of hemopoiesis	0.0138253
LUAD	650655,142827,100418920,100422407,103689846,100288319,391267,100874247,100132420,653145,80117,140456,100288307,10317,646201,400500,388553,347359,106481693,100421709,118611,387695,254439,283461,128653,246312,340073,203076,794,796,101929110,859,440184,344807,100129297,166979,1038,1041,1094,1057,646096,63924,1047,574016,7401,119467,101927465,414316,1421,389903,360180,1557,100996571,1617,646378,10087…	BP	GO:1903707	negative regulation of hemopoiesis	0.0299474
LUAD	650655,142827,100418920,100422407,103689846,100288319,391267,100874247,100132420,653145,80117,140456,100288307,10317,646201,400500,388553,347359,106481693,100421709,118611,387695,254439,283461,128653,246312,340073,203076,794,796,101929110,859,440184,344807,100129297,166979,1038,1041,1094,1057,646096,63924,1047,574016,7401,119467,101927465,414316,1421,389903,360180,1557,100996571,1617,646378,10087…	BP	GO:0042742	defense response to bacterium	0.0324091
LUAD	650655,142827,100418920,100422407,103689846,100288319,391267,100874247,100132420,653145,80117,140456,100288307,10317,646201,400500,388553,347359,106481693,100421709,118611,387695,254439,283461,128653,246312,340073,203076,794,796,101929110,859,440184,344807,100129297,166979,1038,1041,1094,1057,646096,63924,1047,574016,7401,119467,101927465,414316,1421,389903,360180,1557,100996571,1617,646378,10087…	BP	GO:0006338	chromatin remodeling	0.0443133
LUAD	650655,142827,100418920,100422407,103689846,100288319,391267,100874247,100132420,653145,80117,140456,100288307,10317,646201,400500,388553,347359,106481693,100421709,118611,387695,254439,283461,128653,246312,340073,203076,794,796,101929110,859,440184,344807,100129297,166979,1038,1041,1094,1057,646096,63924,1047,574016,7401,119467,101927465,414316,1421,389903,360180,1557,100996571,1617,646378,10087…	CC	GO:0000786	nucleosome	1.50526e-48
LUAD	650655,142827,100418920,100422407,103689846,100288319,391267,100874247,100132420,653145,80117,140456,100288307,10317,646201,400500,388553,347359,106481693,100421709,118611,387695,254439,283461,128653,246312,340073,203076,794,796,101929110,859,440184,344807,100129297,166979,1038,1041,1094,1057,646096,63924,1047,574016,7401,119467,101927465,414316,1421,389903,360180,1557,100996571,1617,646378,10087…	CC	GO:0044815	DNA packaging complex	1.67395e-47
LUAD	650655,142827,100418920,100422407,103689846,100288319,391267,100874247,100132420,653145,80117,140456,100288307,10317,646201,400500,388553,347359,106481693,100421709,118611,387695,254439,283461,128653,246312,340073,203076,794,796,101929110,859,440184,344807,100129297,166979,1038,1041,1094,1057,646096,63924,1047,574016,7401,119467,101927465,414316,1421,389903,360180,1557,100996571,1617,646378,10087…	CC	GO:0032993	protein-DNA complex	2.51174e-39
LUAD	650655,142827,100418920,100422407,103689846,100288319,391267,100874247,100132420,653145,80117,140456,100288307,10317,646201,400500,388553,347359,106481693,100421709,118611,387695,254439,283461,128653,246312,340073,203076,794,796,101929110,859,440184,344807,100129297,166979,1038,1041,1094,1057,646096,63924,1047,574016,7401,119467,101927465,414316,1421,389903,360180,1557,100996571,1617,646378,10087…	CC	GO:0000785	chromatin	6.40297e-22
LUAD	650655,142827,100418920,100422407,103689846,100288319,391267,100874247,100132420,653145,80117,140456,100288307,10317,646201,400500,388553,347359,106481693,100421709,118611,387695,254439,283461,128653,246312,340073,203076,794,796,101929110,859,440184,344807,100129297,166979,1038,1041,1094,1057,646096,63924,1047,574016,7401,119467,101927465,414316,1421,389903,360180,1557,100996571,1617,646378,10087…	CC	GO:0000788	nuclear nucleosome	1.32068e-16
LUAD	650655,142827,100418920,100422407,103689846,100288319,391267,100874247,100132420,653145,80117,140456,100288307,10317,646201,400500,388553,347359,106481693,100421709,118611,387695,254439,283461,128653,246312,340073,203076,794,796,101929110,859,440184,344807,100129297,166979,1038,1041,1094,1057,646096,63924,1047,574016,7401,119467,101927465,414316,1421,389903,360180,1557,100996571,1617,646378,10087…	CC	GO:0000790	nuclear chromatin	5.46407e-07
LUAD	650655,142827,100418920,100422407,103689846,100288319,391267,100874247,100132420,653145,80117,140456,100288307,10317,646201,400500,388553,347359,106481693,100421709,118611,387695,254439,283461,128653,246312,340073,203076,794,796,101929110,859,440184,344807,100129297,166979,1038,1041,1094,1057,646096,63924,1047,574016,7401,119467,101927465,414316,1421,389903,360180,1557,100996571,1617,646378,10087…	CC	GO:0000228	nuclear chromosome	2.23176e-06
LUAD	650655,142827,100418920,100422407,103689846,100288319,391267,100874247,100132420,653145,80117,140456,100288307,10317,646201,400500,388553,347359,106481693,100421709,118611,387695,254439,283461,128653,246312,340073,203076,794,796,101929110,859,440184,344807,100129297,166979,1038,1041,1094,1057,646096,63924,1047,574016,7401,119467,101927465,414316,1421,389903,360180,1557,100996571,1617,646378,10087…	CC	GO:0044454	nuclear chromosome part	2.34494e-06
LUAD	650655,142827,100418920,100422407,103689846,100288319,391267,100874247,100132420,653145,80117,140456,100288307,10317,646201,400500,388553,347359,106481693,100421709,118611,387695,254439,283461,128653,246312,340073,203076,794,796,101929110,859,440184,344807,100129297,166979,1038,1041,1094,1057,646096,63924,1047,574016,7401,119467,101927465,414316,1421,389903,360180,1557,100996571,1617,646378,10087…	CC	GO:0000784	nuclear chromosome, telomeric region	2.69289e-05
LUAD	650655,142827,100418920,100422407,103689846,100288319,391267,100874247,100132420,653145,80117,140456,100288307,10317,646201,400500,388553,347359,106481693,100421709,118611,387695,254439,283461,128653,246312,340073,203076,794,796,101929110,859,440184,344807,100129297,166979,1038,1041,1094,1057,646096,63924,1047,574016,7401,119467,101927465,414316,1421,389903,360180,1557,100996571,1617,646378,10087…	CC	GO:0000781	chromosome, telomeric region	0.000222737
LUAD	650655,142827,100418920,100422407,103689846,100288319,391267,100874247,100132420,653145,80117,140456,100288307,10317,646201,400500,388553,347359,106481693,100421709,118611,387695,254439,283461,128653,246312,340073,203076,794,796,101929110,859,440184,344807,100129297,166979,1038,1041,1094,1057,646096,63924,1047,574016,7401,119467,101927465,414316,1421,389903,360180,1557,100996571,1617,646378,10087…	MF	GO:0046982	protein heterodimerization activity	2.58048e-22
LUSC	29974,344752,64240,145447,130013,390928,123876,103689846,100128127,183,205147,149992,340120,257629,107126360,337,100533990,55937,10777,142685,401036,429,647219,100423060,100874518,284257,60467,254240,676,647166,145858,162083,388276,92346,148345,338761,338872,388960,731,763,765,2694,126402,196477,1097,3078,100874507,100420342,285888,1269,1370,54544,203413,352905,399697,100288463,1584,414301,613210…	CC	GO:0031225	anchored component of membrane	0.0157328
LUSC	29974,344752,64240,145447,130013,390928,123876,103689846,100128127,183,205147,149992,340120,257629,107126360,337,100533990,55937,10777,142685,401036,429,647219,100423060,100874518,284257,60467,254240,676,647166,145858,162083,388276,92346,148345,338761,338872,388960,731,763,765,2694,126402,196477,1097,3078,100874507,100420342,285888,1269,1370,54544,203413,352905,399697,100288463,1584,414301,613210…	CC	GO:0072562	blood microparticle	0.0275088
LUSC	29974,344752,64240,145447,130013,390928,123876,103689846,100128127,183,205147,149992,340120,257629,107126360,337,100533990,55937,10777,142685,401036,429,647219,100423060,100874518,284257,60467,254240,676,647166,145858,162083,388276,92346,148345,338761,338872,388960,731,763,765,2694,126402,196477,1097,3078,100874507,100420342,285888,1269,1370,54544,203413,352905,399697,100288463,1584,414301,613210…	MF	GO:0005179	hormone activity	0.0120669
OV	140625,642394,125,9370,84740,57016,100862662,285016,248,258,277,642460,100287718,147429,440461,158833,85319,101928040,53630,389206,640,9210,100128849,106480280,414157,118461,146723,127003,127795,128602,100190949,29113,606553,51806,125972,339512,886,6359,339521,166979,255101,114335,93659,1141,1144,387836,154790,93978,392343,205272,1280,728763,200575,102723631,1504,646243,1548,728597,139189,1734,17…	CC	GO:0099055	integral component of postsynaptic membrane	0.0255218
OV	140625,642394,125,9370,84740,57016,100862662,285016,248,258,277,642460,100287718,147429,440461,158833,85319,101928040,53630,389206,640,9210,100128849,106480280,414157,118461,146723,127003,127795,128602,100190949,29113,606553,51806,125972,339512,886,6359,339521,166979,255101,114335,93659,1141,1144,387836,154790,93978,392343,205272,1280,728763,200575,102723631,1504,646243,1548,728597,139189,1734,17…	CC	GO:0098936	intrinsic component of postsynaptic membrane	0.0255218
OV	140625,642394,125,9370,84740,57016,100862662,285016,248,258,277,642460,100287718,147429,440461,158833,85319,101928040,53630,389206,640,9210,100128849,106480280,414157,118461,146723,127003,127795,128602,100190949,29113,606553,51806,125972,339512,886,6359,339521,166979,255101,114335,93659,1141,1144,387836,154790,93978,392343,205272,1280,728763,200575,102723631,1504,646243,1548,728597,139189,1734,17…	MF	GO:0048018	receptor ligand activity	0.000480251
OV	140625,642394,125,9370,84740,57016,100862662,285016,248,258,277,642460,100287718,147429,440461,158833,85319,101928040,53630,389206,640,9210,100128849,106480280,414157,118461,146723,127003,127795,128602,100190949,29113,606553,51806,125972,339512,886,6359,339521,166979,255101,114335,93659,1141,1144,387836,154790,93978,392343,205272,1280,728763,200575,102723631,1504,646243,1548,728597,139189,1734,17…	MF	GO:0030545	receptor regulator activity	0.000514078
OV	140625,642394,125,9370,84740,57016,100862662,285016,248,258,277,642460,100287718,147429,440461,158833,85319,101928040,53630,389206,640,9210,100128849,106480280,414157,118461,146723,127003,127795,128602,100190949,29113,606553,51806,125972,339512,886,6359,339521,166979,255101,114335,93659,1141,1144,387836,154790,93978,392343,205272,1280,728763,200575,102723631,1504,646243,1548,728597,139189,1734,17…	MF	GO:0008083	growth factor activity	0.00131801
OV	140625,642394,125,9370,84740,57016,100862662,285016,248,258,277,642460,100287718,147429,440461,158833,85319,101928040,53630,389206,640,9210,100128849,106480280,414157,118461,146723,127003,127795,128602,100190949,29113,606553,51806,125972,339512,886,6359,339521,166979,255101,114335,93659,1141,1144,387836,154790,93978,392343,205272,1280,728763,200575,102723631,1504,646243,1548,728597,139189,1734,17…	MF	GO:0005179	hormone activity	0.0326668
PAAD	55289,72,27299,84435,10149,136,189,1109,248,115701,219287,8862,403314,100533184,158763,100507524,219681,57412,55515,478,27087,1620,84446,118663,646330,93190,127003,127795,10882,165257,338761,100507410,441054,389336,56934,255022,79012,820,6366,8838,414194,1002,1044,63036,51032,649264,286464,146845,389799,1118,1135,55584,1149,102216268,1208,116173,1264,1269,1296,10815,1378,1379,1412,1428,1439,1447,…	MF	GO:0048018	receptor ligand activity	0.00101536
PAAD	55289,72,27299,84435,10149,136,189,1109,248,115701,219287,8862,403314,100533184,158763,100507524,219681,57412,55515,478,27087,1620,84446,118663,646330,93190,127003,127795,10882,165257,338761,100507410,441054,389336,56934,255022,79012,820,6366,8838,414194,1002,1044,63036,51032,649264,286464,146845,389799,1118,1135,55584,1149,102216268,1208,116173,1264,1269,1296,10815,1378,1379,1412,1428,1439,1447,…	MF	GO:0030545	receptor regulator activity	0.00119507
PAAD	55289,72,27299,84435,10149,136,189,1109,248,115701,219287,8862,403314,100533184,158763,100507524,219681,57412,55515,478,27087,1620,84446,118663,646330,93190,127003,127795,10882,165257,338761,100507410,441054,389336,56934,255022,79012,820,6366,8838,414194,1002,1044,63036,51032,649264,286464,146845,389799,1118,1135,55584,1149,102216268,1208,116173,1264,1269,1296,10815,1378,1379,1412,1428,1439,1447,…	MF	GO:0071855	neuropeptide receptor binding	0.00168011
PAAD	55289,72,27299,84435,10149,136,189,1109,248,115701,219287,8862,403314,100533184,158763,100507524,219681,57412,55515,478,27087,1620,84446,118663,646330,93190,127003,127795,10882,165257,338761,100507410,441054,389336,56934,255022,79012,820,6366,8838,414194,1002,1044,63036,51032,649264,286464,146845,389799,1118,1135,55584,1149,102216268,1208,116173,1264,1269,1296,10815,1378,1379,1412,1428,1439,1447,…	MF	GO:0015276	ligand-gated ion channel activity	0.0134212
PAAD	55289,72,27299,84435,10149,136,189,1109,248,115701,219287,8862,403314,100533184,158763,100507524,219681,57412,55515,478,27087,1620,84446,118663,646330,93190,127003,127795,10882,165257,338761,100507410,441054,389336,56934,255022,79012,820,6366,8838,414194,1002,1044,63036,51032,649264,286464,146845,389799,1118,1135,55584,1149,102216268,1208,116173,1264,1269,1296,10815,1378,1379,1412,1428,1439,1447,…	MF	GO:0022834	ligand-gated channel activity	0.0134212
PAAD	55289,72,27299,84435,10149,136,189,1109,248,115701,219287,8862,403314,100533184,158763,100507524,219681,57412,55515,478,27087,1620,84446,118663,646330,93190,127003,127795,10882,165257,338761,100507410,441054,389336,56934,255022,79012,820,6366,8838,414194,1002,1044,63036,51032,649264,286464,146845,389799,1118,1135,55584,1149,102216268,1208,116173,1264,1269,1296,10815,1378,1379,1412,1428,1439,1447,…	MF	GO:0005249	voltage-gated potassium channel activity	0.0134212
PAAD	55289,72,27299,84435,10149,136,189,1109,248,115701,219287,8862,403314,100533184,158763,100507524,219681,57412,55515,478,27087,1620,84446,118663,646330,93190,127003,127795,10882,165257,338761,100507410,441054,389336,56934,255022,79012,820,6366,8838,414194,1002,1044,63036,51032,649264,286464,146845,389799,1118,1135,55584,1149,102216268,1208,116173,1264,1269,1296,10815,1378,1379,1412,1428,1439,1447,…	MF	GO:0099094	ligand-gated cation channel activity	0.0146549
PAAD	55289,72,27299,84435,10149,136,189,1109,248,115701,219287,8862,403314,100533184,158763,100507524,219681,57412,55515,478,27087,1620,84446,118663,646330,93190,127003,127795,10882,165257,338761,100507410,441054,389336,56934,255022,79012,820,6366,8838,414194,1002,1044,63036,51032,649264,286464,146845,389799,1118,1135,55584,1149,102216268,1208,116173,1264,1269,1296,10815,1378,1379,1412,1428,1439,1447,…	MF	GO:0017171	serine hydrolase activity	0.0199482
PAAD	55289,72,27299,84435,10149,136,189,1109,248,115701,219287,8862,403314,100533184,158763,100507524,219681,57412,55515,478,27087,1620,84446,118663,646330,93190,127003,127795,10882,165257,338761,100507410,441054,389336,56934,255022,79012,820,6366,8838,414194,1002,1044,63036,51032,649264,286464,146845,389799,1118,1135,55584,1149,102216268,1208,116173,1264,1269,1296,10815,1378,1379,1412,1428,1439,1447,…	MF	GO:0005179	hormone activity	0.0228468
PAAD	55289,72,27299,84435,10149,136,189,1109,248,115701,219287,8862,403314,100533184,158763,100507524,219681,57412,55515,478,27087,1620,84446,118663,646330,93190,127003,127795,10882,165257,338761,100507410,441054,389336,56934,255022,79012,820,6366,8838,414194,1002,1044,63036,51032,649264,286464,146845,389799,1118,1135,55584,1149,102216268,1208,116173,1264,1269,1296,10815,1378,1379,1412,1428,1439,1447,…	MF	GO:0022843	voltage-gated cation channel activity	0.0258884
PAAD	55289,72,27299,84435,10149,136,189,1109,248,115701,219287,8862,403314,100533184,158763,100507524,219681,57412,55515,478,27087,1620,84446,118663,646330,93190,127003,127795,10882,165257,338761,100507410,441054,389336,56934,255022,79012,820,6366,8838,414194,1002,1044,63036,51032,649264,286464,146845,389799,1118,1135,55584,1149,102216268,1208,116173,1264,1269,1296,10815,1378,1379,1412,1428,1439,1447,…	MF	GO:0005261	cation channel activity	0.0268771
PAAD	55289,72,27299,84435,10149,136,189,1109,248,115701,219287,8862,403314,100533184,158763,100507524,219681,57412,55515,478,27087,1620,84446,118663,646330,93190,127003,127795,10882,165257,338761,100507410,441054,389336,56934,255022,79012,820,6366,8838,414194,1002,1044,63036,51032,649264,286464,146845,389799,1118,1135,55584,1149,102216268,1208,116173,1264,1269,1296,10815,1378,1379,1412,1428,1439,1447,…	MF	GO:0015079	potassium ion transmembrane transporter activity	0.0268771
PAAD	55289,72,27299,84435,10149,136,189,1109,248,115701,219287,8862,403314,100533184,158763,100507524,219681,57412,55515,478,27087,1620,84446,118663,646330,93190,127003,127795,10882,165257,338761,100507410,441054,389336,56934,255022,79012,820,6366,8838,414194,1002,1044,63036,51032,649264,286464,146845,389799,1118,1135,55584,1149,102216268,1208,116173,1264,1269,1296,10815,1378,1379,1412,1428,1439,1447,…	MF	GO:0001846	opsonin binding	0.0299246
PAAD	55289,72,27299,84435,10149,136,189,1109,248,115701,219287,8862,403314,100533184,158763,100507524,219681,57412,55515,478,27087,1620,84446,118663,646330,93190,127003,127795,10882,165257,338761,100507410,441054,389336,56934,255022,79012,820,6366,8838,414194,1002,1044,63036,51032,649264,286464,146845,389799,1118,1135,55584,1149,102216268,1208,116173,1264,1269,1296,10815,1378,1379,1412,1428,1439,1447,…	MF	GO:0022839	ion gated channel activity	0.0340711
PAAD	55289,72,27299,84435,10149,136,189,1109,248,115701,219287,8862,403314,100533184,158763,100507524,219681,57412,55515,478,27087,1620,84446,118663,646330,93190,127003,127795,10882,165257,338761,100507410,441054,389336,56934,255022,79012,820,6366,8838,414194,1002,1044,63036,51032,649264,286464,146845,389799,1118,1135,55584,1149,102216268,1208,116173,1264,1269,1296,10815,1378,1379,1412,1428,1439,1447,…	MF	GO:0022836	gated channel activity	0.0340711
PAAD	55289,72,27299,84435,10149,136,189,1109,248,115701,219287,8862,403314,100533184,158763,100507524,219681,57412,55515,478,27087,1620,84446,118663,646330,93190,127003,127795,10882,165257,338761,100507410,441054,389336,56934,255022,79012,820,6366,8838,414194,1002,1044,63036,51032,649264,286464,146845,389799,1118,1135,55584,1149,102216268,1208,116173,1264,1269,1296,10815,1378,1379,1412,1428,1439,1447,…	MF	GO:0008236	serine-type peptidase activity	0.0358713
PAAD	55289,72,27299,84435,10149,136,189,1109,248,115701,219287,8862,403314,100533184,158763,100507524,219681,57412,55515,478,27087,1620,84446,118663,646330,93190,127003,127795,10882,165257,338761,100507410,441054,389336,56934,255022,79012,820,6366,8838,414194,1002,1044,63036,51032,649264,286464,146845,389799,1118,1135,55584,1149,102216268,1208,116173,1264,1269,1296,10815,1378,1379,1412,1428,1439,1447,…	MF	GO:0005267	potassium channel activity	0.0425553
PAAD	55289,72,27299,84435,10149,136,189,1109,248,115701,219287,8862,403314,100533184,158763,100507524,219681,57412,55515,478,27087,1620,84446,118663,646330,93190,127003,127795,10882,165257,338761,100507410,441054,389336,56934,255022,79012,820,6366,8838,414194,1002,1044,63036,51032,649264,286464,146845,389799,1118,1135,55584,1149,102216268,1208,116173,1264,1269,1296,10815,1378,1379,1412,1428,1439,1447,…	MF	GO:0008395	steroid hydroxylase activity	0.0425553
PAAD	55289,72,27299,84435,10149,136,189,1109,248,115701,219287,8862,403314,100533184,158763,100507524,219681,57412,55515,478,27087,1620,84446,118663,646330,93190,127003,127795,10882,165257,338761,100507410,441054,389336,56934,255022,79012,820,6366,8838,414194,1002,1044,63036,51032,649264,286464,146845,389799,1118,1135,55584,1149,102216268,1208,116173,1264,1269,1296,10815,1378,1379,1412,1428,1439,1447,…	MF	GO:0005216	ion channel activity	0.0425553
PAAD	55289,72,27299,84435,10149,136,189,1109,248,115701,219287,8862,403314,100533184,158763,100507524,219681,57412,55515,478,27087,1620,84446,118663,646330,93190,127003,127795,10882,165257,338761,100507410,441054,389336,56934,255022,79012,820,6366,8838,414194,1002,1044,63036,51032,649264,286464,146845,389799,1118,1135,55584,1149,102216268,1208,116173,1264,1269,1296,10815,1378,1379,1412,1428,1439,1447,…	MF	GO:0004252	serine-type endopeptidase activity	0.0440792
PAAD	55289,72,27299,84435,10149,136,189,1109,248,115701,219287,8862,403314,100533184,158763,100507524,219681,57412,55515,478,27087,1620,84446,118663,646330,93190,127003,127795,10882,165257,338761,100507410,441054,389336,56934,255022,79012,820,6366,8838,414194,1002,1044,63036,51032,649264,286464,146845,389799,1118,1135,55584,1149,102216268,1208,116173,1264,1269,1296,10815,1378,1379,1412,1428,1439,1447,…	MF	GO:0001848	complement binding	0.0440792
PAAD	55289,72,27299,84435,10149,136,189,1109,248,115701,219287,8862,403314,100533184,158763,100507524,219681,57412,55515,478,27087,1620,84446,118663,646330,93190,127003,127795,10882,165257,338761,100507410,441054,389336,56934,255022,79012,820,6366,8838,414194,1002,1044,63036,51032,649264,286464,146845,389799,1118,1135,55584,1149,102216268,1208,116173,1264,1269,1296,10815,1378,1379,1412,1428,1439,1447,…	MF	GO:0022838	substrate-specific channel activity	0.045891
PRAD	58,8749,441416,124,158798,231,27329,55107,100874239,80117,101929716,40,460,100874205,480,100507097,100874322,80115,100133163,387695,127795,100507249,389649,762,100420043,874,1000,389118,8941,1048,414196,389799,1146,101927096,389383,378832,1280,1339,1440,100169989,100421371,10824,729582,284215,10655,92235,84332,196549,1943,219670,6824,84141,83648,9834,388698,166752,64090,729403,106480740,2731,2723…	CC	GO:0005865	striated muscle thin filament	0.0262024
PRAD	58,8749,441416,124,158798,231,27329,55107,100874239,80117,101929716,40,460,100874205,480,100507097,100874322,80115,100133163,387695,127795,100507249,389649,762,100420043,874,1000,389118,8941,1048,414196,389799,1146,101927096,389383,378832,1280,1339,1440,100169989,100421371,10824,729582,284215,10655,92235,84332,196549,1943,219670,6824,84141,83648,9834,388698,166752,64090,729403,106480740,2731,2723…	CC	GO:0030017	sarcomere	0.0262024
PRAD	58,8749,441416,124,158798,231,27329,55107,100874239,80117,101929716,40,460,100874205,480,100507097,100874322,80115,100133163,387695,127795,100507249,389649,762,100420043,874,1000,389118,8941,1048,414196,389799,1146,101927096,389383,378832,1280,1339,1440,100169989,100421371,10824,729582,284215,10655,92235,84332,196549,1943,219670,6824,84141,83648,9834,388698,166752,64090,729403,106480740,2731,2723…	CC	GO:0036379	myofilament	0.0262024
PRAD	58,8749,441416,124,158798,231,27329,55107,100874239,80117,101929716,40,460,100874205,480,100507097,100874322,80115,100133163,387695,127795,100507249,389649,762,100420043,874,1000,389118,8941,1048,414196,389799,1146,101927096,389383,378832,1280,1339,1440,100169989,100421371,10824,729582,284215,10655,92235,84332,196549,1943,219670,6824,84141,83648,9834,388698,166752,64090,729403,106480740,2731,2723…	CC	GO:0044449	contractile fiber part	0.0296505
PRAD	58,8749,441416,124,158798,231,27329,55107,100874239,80117,101929716,40,460,100874205,480,100507097,100874322,80115,100133163,387695,127795,100507249,389649,762,100420043,874,1000,389118,8941,1048,414196,389799,1146,101927096,389383,378832,1280,1339,1440,100169989,100421371,10824,729582,284215,10655,92235,84332,196549,1943,219670,6824,84141,83648,9834,388698,166752,64090,729403,106480740,2731,2723…	CC	GO:0030016	myofibril	0.0296505
PRAD	58,8749,441416,124,158798,231,27329,55107,100874239,80117,101929716,40,460,100874205,480,100507097,100874322,80115,100133163,387695,127795,100507249,389649,762,100420043,874,1000,389118,8941,1048,414196,389799,1146,101927096,389383,378832,1280,1339,1440,100169989,100421371,10824,729582,284215,10655,92235,84332,196549,1943,219670,6824,84141,83648,9834,388698,166752,64090,729403,106480740,2731,2723…	CC	GO:0043292	contractile fiber	0.0350661
UCEC	344752,24,94160,51554,123876,59,345651,170690,101929335,642394,577,126,127,9370,645220,151,391552,100271873,441282,1645,100874263,259,162282,91074,645784,56899,257629,290,312,316,350,89872,374,440461,100887075,398,390790,100996425,100507117,54829,477,10677,401393,570,100127960,100419324,112401,650,100379249,106480324,254240,283461,317761,388381,644041,100128603,10485,401027,722,152940,100507249,1…	BP	GO:0006334	nucleosome assembly	0.0289845
UCEC	344752,24,94160,51554,123876,59,345651,170690,101929335,642394,577,126,127,9370,645220,151,391552,100271873,441282,1645,100874263,259,162282,91074,645784,56899,257629,290,312,316,350,89872,374,440461,100887075,398,390790,100996425,100507117,54829,477,10677,401393,570,100127960,100419324,112401,650,100379249,106480324,254240,283461,317761,388381,644041,100128603,10485,401027,722,152940,100507249,1…	BP	GO:0045653	negative regulation of megakaryocyte differentiation	0.0289845
UCEC	344752,24,94160,51554,123876,59,345651,170690,101929335,642394,577,126,127,9370,645220,151,391552,100271873,441282,1645,100874263,259,162282,91074,645784,56899,257629,290,312,316,350,89872,374,440461,100887075,398,390790,100996425,100507117,54829,477,10677,401393,570,100127960,100419324,112401,650,100379249,106480324,254240,283461,317761,388381,644041,100128603,10485,401027,722,152940,100507249,1…	BP	GO:0006335	DNA replication-dependent nucleosome assembly	0.0289845
UCEC	344752,24,94160,51554,123876,59,345651,170690,101929335,642394,577,126,127,9370,645220,151,391552,100271873,441282,1645,100874263,259,162282,91074,645784,56899,257629,290,312,316,350,89872,374,440461,100887075,398,390790,100996425,100507117,54829,477,10677,401393,570,100127960,100419324,112401,650,100379249,106480324,254240,283461,317761,388381,644041,100128603,10485,401027,722,152940,100507249,1…	BP	GO:0034723	DNA replication-dependent nucleosome organization	0.0289845
UCEC	344752,24,94160,51554,123876,59,345651,170690,101929335,642394,577,126,127,9370,645220,151,391552,100271873,441282,1645,100874263,259,162282,91074,645784,56899,257629,290,312,316,350,89872,374,440461,100887075,398,390790,100996425,100507117,54829,477,10677,401393,570,100127960,100419324,112401,650,100379249,106480324,254240,283461,317761,388381,644041,100128603,10485,401027,722,152940,100507249,1…	BP	GO:0031497	chromatin assembly	0.0408098
UCEC	344752,24,94160,51554,123876,59,345651,170690,101929335,642394,577,126,127,9370,645220,151,391552,100271873,441282,1645,100874263,259,162282,91074,645784,56899,257629,290,312,316,350,89872,374,440461,100887075,398,390790,100996425,100507117,54829,477,10677,401393,570,100127960,100419324,112401,650,100379249,106480324,254240,283461,317761,388381,644041,100128603,10485,401027,722,152940,100507249,1…	BP	GO:0051937	catecholamine transport	0.0496192
UCEC	344752,24,94160,51554,123876,59,345651,170690,101929335,642394,577,126,127,9370,645220,151,391552,100271873,441282,1645,100874263,259,162282,91074,645784,56899,257629,290,312,316,350,89872,374,440461,100887075,398,390790,100996425,100507117,54829,477,10677,401393,570,100127960,100419324,112401,650,100379249,106480324,254240,283461,317761,388381,644041,100128603,10485,401027,722,152940,100507249,1…	BP	GO:0000183	chromatin silencing at rDNA	0.0496192
UCEC	344752,24,94160,51554,123876,59,345651,170690,101929335,642394,577,126,127,9370,645220,151,391552,100271873,441282,1645,100874263,259,162282,91074,645784,56899,257629,290,312,316,350,89872,374,440461,100887075,398,390790,100996425,100507117,54829,477,10677,401393,570,100127960,100419324,112401,650,100379249,106480324,254240,283461,317761,388381,644041,100128603,10485,401027,722,152940,100507249,1…	BP	GO:0034728	nucleosome organization	0.0496192
UCEC	344752,24,94160,51554,123876,59,345651,170690,101929335,642394,577,126,127,9370,645220,151,391552,100271873,441282,1645,100874263,259,162282,91074,645784,56899,257629,290,312,316,350,89872,374,440461,100887075,398,390790,100996425,100507117,54829,477,10677,401393,570,100127960,100419324,112401,650,100379249,106480324,254240,283461,317761,388381,644041,100128603,10485,401027,722,152940,100507249,1…	CC	GO:0000786	nucleosome	0.000582831
UCEC	344752,24,94160,51554,123876,59,345651,170690,101929335,642394,577,126,127,9370,645220,151,391552,100271873,441282,1645,100874263,259,162282,91074,645784,56899,257629,290,312,316,350,89872,374,440461,100887075,398,390790,100996425,100507117,54829,477,10677,401393,570,100127960,100419324,112401,650,100379249,106480324,254240,283461,317761,388381,644041,100128603,10485,401027,722,152940,100507249,1…	CC	GO:0062023	collagen-containing extracellular matrix	0.000582831
UCEC	344752,24,94160,51554,123876,59,345651,170690,101929335,642394,577,126,127,9370,645220,151,391552,100271873,441282,1645,100874263,259,162282,91074,645784,56899,257629,290,312,316,350,89872,374,440461,100887075,398,390790,100996425,100507117,54829,477,10677,401393,570,100127960,100419324,112401,650,100379249,106480324,254240,283461,317761,388381,644041,100128603,10485,401027,722,152940,100507249,1…	CC	GO:0044815	DNA packaging complex	0.000582831
UCEC	344752,24,94160,51554,123876,59,345651,170690,101929335,642394,577,126,127,9370,645220,151,391552,100271873,441282,1645,100874263,259,162282,91074,645784,56899,257629,290,312,316,350,89872,374,440461,100887075,398,390790,100996425,100507117,54829,477,10677,401393,570,100127960,100419324,112401,650,100379249,106480324,254240,283461,317761,388381,644041,100128603,10485,401027,722,152940,100507249,1…	CC	GO:0000788	nuclear nucleosome	0.00109966
UCEC	344752,24,94160,51554,123876,59,345651,170690,101929335,642394,577,126,127,9370,645220,151,391552,100271873,441282,1645,100874263,259,162282,91074,645784,56899,257629,290,312,316,350,89872,374,440461,100887075,398,390790,100996425,100507117,54829,477,10677,401393,570,100127960,100419324,112401,650,100379249,106480324,254240,283461,317761,388381,644041,100128603,10485,401027,722,152940,100507249,1…	CC	GO:0031012	extracellular matrix	0.00142753
UCEC	344752,24,94160,51554,123876,59,345651,170690,101929335,642394,577,126,127,9370,645220,151,391552,100271873,441282,1645,100874263,259,162282,91074,645784,56899,257629,290,312,316,350,89872,374,440461,100887075,398,390790,100996425,100507117,54829,477,10677,401393,570,100127960,100419324,112401,650,100379249,106480324,254240,283461,317761,388381,644041,100128603,10485,401027,722,152940,100507249,1…	CC	GO:0005921	gap junction	0.0247834
UCEC	344752,24,94160,51554,123876,59,345651,170690,101929335,642394,577,126,127,9370,645220,151,391552,100271873,441282,1645,100874263,259,162282,91074,645784,56899,257629,290,312,316,350,89872,374,440461,100887075,398,390790,100996425,100507117,54829,477,10677,401393,570,100127960,100419324,112401,650,100379249,106480324,254240,283461,317761,388381,644041,100128603,10485,401027,722,152940,100507249,1…	CC	GO:0032993	protein-DNA complex	0.0301212
UCEC	344752,24,94160,51554,123876,59,345651,170690,101929335,642394,577,126,127,9370,645220,151,391552,100271873,441282,1645,100874263,259,162282,91074,645784,56899,257629,290,312,316,350,89872,374,440461,100887075,398,390790,100996425,100507117,54829,477,10677,401393,570,100127960,100419324,112401,650,100379249,106480324,254240,283461,317761,388381,644041,100128603,10485,401027,722,152940,100507249,1…	CC	GO:0005922	connexin complex	0.0301212
UCEC	344752,24,94160,51554,123876,59,345651,170690,101929335,642394,577,126,127,9370,645220,151,391552,100271873,441282,1645,100874263,259,162282,91074,645784,56899,257629,290,312,316,350,89872,374,440461,100887075,398,390790,100996425,100507117,54829,477,10677,401393,570,100127960,100419324,112401,650,100379249,106480324,254240,283461,317761,388381,644041,100128603,10485,401027,722,152940,100507249,1…	MF	GO:0046873	metal ion transmembrane transporter activity	0.00683813
UCEC	344752,24,94160,51554,123876,59,345651,170690,101929335,642394,577,126,127,9370,645220,151,391552,100271873,441282,1645,100874263,259,162282,91074,645784,56899,257629,290,312,316,350,89872,374,440461,100887075,398,390790,100996425,100507117,54829,477,10677,401393,570,100127960,100419324,112401,650,100379249,106480324,254240,283461,317761,388381,644041,100128603,10485,401027,722,152940,100507249,1…	MF	GO:0015267	channel activity	0.00683813
UCEC	344752,24,94160,51554,123876,59,345651,170690,101929335,642394,577,126,127,9370,645220,151,391552,100271873,441282,1645,100874263,259,162282,91074,645784,56899,257629,290,312,316,350,89872,374,440461,100887075,398,390790,100996425,100507117,54829,477,10677,401393,570,100127960,100419324,112401,650,100379249,106480324,254240,283461,317761,388381,644041,100128603,10485,401027,722,152940,100507249,1…	MF	GO:0022803	passive transmembrane transporter activity	0.00683813
UCEC	344752,24,94160,51554,123876,59,345651,170690,101929335,642394,577,126,127,9370,645220,151,391552,100271873,441282,1645,100874263,259,162282,91074,645784,56899,257629,290,312,316,350,89872,374,440461,100887075,398,390790,100996425,100507117,54829,477,10677,401393,570,100127960,100419324,112401,650,100379249,106480324,254240,283461,317761,388381,644041,100128603,10485,401027,722,152940,100507249,1…	MF	GO:0022890	inorganic cation transmembrane transporter activity	0.0188656
UCEC	344752,24,94160,51554,123876,59,345651,170690,101929335,642394,577,126,127,9370,645220,151,391552,100271873,441282,1645,100874263,259,162282,91074,645784,56899,257629,290,312,316,350,89872,374,440461,100887075,398,390790,100996425,100507117,54829,477,10677,401393,570,100127960,100419324,112401,650,100379249,106480324,254240,283461,317761,388381,644041,100128603,10485,401027,722,152940,100507249,1…	MF	GO:0008324	cation transmembrane transporter activity	0.0189173
UCEC	344752,24,94160,51554,123876,59,345651,170690,101929335,642394,577,126,127,9370,645220,151,391552,100271873,441282,1645,100874263,259,162282,91074,645784,56899,257629,290,312,316,350,89872,374,440461,100887075,398,390790,100996425,100507117,54829,477,10677,401393,570,100127960,100419324,112401,650,100379249,106480324,254240,283461,317761,388381,644041,100128603,10485,401027,722,152940,100507249,1…	MF	GO:0030021	extracellular matrix structural constituent conferring compression resistance	0.043695
UCEC	344752,24,94160,51554,123876,59,345651,170690,101929335,642394,577,126,127,9370,645220,151,391552,100271873,441282,1645,100874263,259,162282,91074,645784,56899,257629,290,312,316,350,89872,374,440461,100887075,398,390790,100996425,100507117,54829,477,10677,401393,570,100127960,100419324,112401,650,100379249,106480324,254240,283461,317761,388381,644041,100128603,10485,401027,722,152940,100507249,1…	MF	GO:0008201	heparin binding	0.043695
