# Supplementary material for: Computing microRNA-gene interaction networks in pan-cancer using miRDriver
Source: Sci Rep. 2022 Mar 8;12:3717. doi: 10.1038/s41598-022-07628-z (PMC8904490; doi:10.1038/s41598-022-07628-z)
Supplement: Supplementary file 4 — Supplementary Information 4. [file 41598_2022_7628_MOESM4_ESM.xlsx]

## Sheet: Sheet1
Computing microRNA-gene interaction networks in pan-cancer using miRDriver Banabithi Bose, Matthew Moravec, and Serdar Bozdag
Supplemental Table S4
Enriched GO-terms for 22 common miRNAs across multiple cancers.

## Sheet: Ontology
	ENRICHED GO TERMS FOR 22 COMMON MIRNAS
ONTOLOGY	ID	Description	Adjusted p-value
BP	GO:0006335	DNA replication-dependent nucleosome assembly	5.25413e-07
BP	GO:0034723	DNA replication-dependent nucleosome organization	5.25413e-07
BP	GO:0000183	chromatin silencing at rDNA	5.25413e-07
BP	GO:0006334	nucleosome assembly	1.92128e-06
BP	GO:0034728	nucleosome organization	1.29228e-05
BP	GO:0031497	chromatin assembly	1.38808e-05
BP	GO:0006323	DNA packaging	5.28869e-05
BP	GO:0051290	protein heterotetramerization	0.000115431
BP	GO:0006333	chromatin assembly or disassembly	0.000142874
BP	GO:0042738	exogenous drug catabolic process	0.000560379
BP	GO:0006342	chromatin silencing	0.00116557
BP	GO:0045652	regulation of megakaryocyte differentiation	0.00116557
BP	GO:0065004	protein-DNA complex assembly	0.00149886
BP	GO:0045814	negative regulation of gene expression, epigenetic	0.00208909
BP	GO:0071824	protein-DNA complex subunit organization	0.00330602
BP	GO:0061844	antimicrobial humoral immune response mediated by antimicrobial peptide	0.00397001
BP	GO:0045653	negative regulation of megakaryocyte differentiation	0.00552128
BP	GO:0030219	megakaryocyte differentiation	0.00655126
BP	GO:0042742	defense response to bacterium	0.00655126
BP	GO:0051291	protein heterooligomerization	0.00890759
BP	GO:0038111	interleukin-7-mediated signaling pathway	0.00959771
BP	GO:0071103	DNA conformation change	0.00993382
BP	GO:0048483	autonomic nervous system development	0.0222491
BP	GO:0060964	regulation of gene silencing by miRNA	0.0236242
BP	GO:0060147	regulation of posttranscriptional gene silencing	0.0276747
BP	GO:0060966	regulation of gene silencing by RNA	0.0276747
BP	GO:0050830	defense response to Gram-positive bacterium	0.0276747
BP	GO:0019730	antimicrobial humoral response	0.0453827
BP	GO:0006720	isoprenoid metabolic process	0.046263
BP	GO:0006721	terpenoid metabolic process	0.046263
BP	GO:0031047	gene silencing by RNA	0.0468216
CC	GO:0000786	nucleosome	1.50703e-17
CC	GO:0044815	DNA packaging complex	6.03993e-17
CC	GO:0032993	protein-DNA complex	1.15878e-10
CC	GO:0000788	nuclear nucleosome	2.23838e-09
CC	GO:0000785	chromatin	0.0198686
MF	GO:0004497	monooxygenase activity	0.000496891
MF	GO:0019825	oxygen binding	0.000555388
MF	GO:0005179	hormone activity	0.00152854
MF	GO:0048018	receptor ligand activity	0.00337706
MF	GO:0046982	protein heterodimerization activity	0.00337706
MF	GO:0030545	receptor regulator activity	0.00337706
MF	GO:0022803	passive transmembrane transporter activity	0.0118006
MF	GO:0016705	oxidoreductase activity, acting on paired donors, with incorporation or reduction of molecular oxygen	0.014307
MF	GO:0015267	channel activity	0.0207151
MF	GO:0005506	iron ion binding	0.0207151
MF	GO:0022839	ion gated channel activity	0.0365468
MF	GO:0022836	gated channel activity	0.0365468
MF	GO:0016712	oxidoreductase activity, acting on paired donors, with incorporation or reduction of molecular oxygen, reduced flavin or flavoprotein as one donor, and incorporation of one atom of oxygen	0.0365468
