# Supplementary material for: Computing microRNA-gene interaction networks in pan-cancer using miRDriver
Source: Sci Rep. 2022 Mar 8;12:3717. doi: 10.1038/s41598-022-07628-z (PMC8904490; doi:10.1038/s41598-022-07628-z)
Supplement: Supplementary file 5 — Supplementary Information 5. [file 41598_2022_7628_MOESM5_ESM.xlsx]

## Sheet: Sheet1
Computing microRNA-gene interaction networks in pan-cancer using miRDriver Banabithi Bose, Matthew Moravec, and Serdar Bozdag
Supplemental Table S5
Enriched Hallmark terms and REACTOME pathways for each selected miRNA.

## Sheet: HALLMARK TERMS
HALLMARK TERMS ENRICHED IN THE TARGETS OF MIRNAS
Cancer Types	miRNA	Hallmark Term	Adjusted p-value
ACC	hsa.miR.1538	HALLMARK_ALLOGRAFT_REJECTION	0.0339673
ACC	hsa.miR.1538	HALLMARK_COMPLEMENT	0.0339673
ACC	hsa.miR.1538	HALLMARK_EPITHELIAL_MESENCHYMAL_TRANSITION	0.0339673
ACC,CESC,DLBC	hsa.miR.6808	HALLMARK_PI3K_AKT_MTOR_SIGNALING	0.0455996
ACC,CESC,DLBC	hsa.miR.6808	HALLMARK_APOPTOSIS	0.0455996
ACC,CESC,DLBC	hsa.miR.6808	HALLMARK_E2F_TARGETS	0.0455996
ACC,CESC,DLBC	hsa.miR.6808	HALLMARK_HYPOXIA	0.0455996
ACC,CESC,DLBC	hsa.miR.6808	HALLMARK_INFLAMMATORY_RESPONSE	0.0455996
ACC,CESC,DLBC	hsa.miR.6808	HALLMARK_INTERFERON_GAMMA_RESPONSE	0.0455996
ACC,CESC,DLBC	hsa.miR.6808	HALLMARK_MTORC1_SIGNALING	0.0455996
ACC,CESC,DLBC	hsa.miR.6808	HALLMARK_MYOGENESIS	0.0455996
ACC,CESC,DLBC	hsa.miR.6808	HALLMARK_P53_PATHWAY	0.0455996
ACC,CESC,DLBC	hsa.miR.6808	HALLMARK_TNFA_SIGNALING_VIA_NFKB	0.0455996
ACC,CESC,ESCA,HNSC,KIRC,LIHC,LUAD,UCEC	hsa.miR.4786	HALLMARK_EPITHELIAL_MESENCHYMAL_TRANSITION	0.0120426
ACC	hsa.miR.3198.2	HALLMARK_ESTROGEN_RESPONSE_EARLY	0.0455996
ACC	hsa.miR.3198.2	HALLMARK_ESTROGEN_RESPONSE_LATE	0.0455996
ACC	hsa.miR.3198.2	HALLMARK_HYPOXIA	0.0455996
ACC	hsa.miR.148b	HALLMARK_KRAS_SIGNALING_DN	0.0455996
ACC	hsa.miR.148b	HALLMARK_MYOGENESIS	0.0455996
ACC,DLBC	hsa.miR.200b	HALLMARK_KRAS_SIGNALING_DN	0.0260137
ACC,BRCA,ESCA	hsa.miR.5010	HALLMARK_COMPLEMENT	0.0455996
ACC,DLBC	hsa.miR.429	HALLMARK_KRAS_SIGNALING_DN	0.0467252
BLCA,DLBC	hsa.miR.627	HALLMARK_UV_RESPONSE_DN	0.0328317
BLCA,CESC,ESCA,UCEC	hsa.let.7a.2	HALLMARK_KRAS_SIGNALING_DN	0.0455996
BLCA,CESC,ESCA,LGG,LIHC,LUAD,UCEC	hsa.miR.100	HALLMARK_ADIPOGENESIS	0.0301064
BLCA,BRCA,LUAD,UCEC	hsa.miR.708	HALLMARK_MYOGENESIS	0.0467252
BLCA,BRCA,CESC,LIHC,LUAD,LUSC,PRAD,UCEC	hsa.miR.548k	HALLMARK_KRAS_SIGNALING_UP	0.0455996
BLCA,ESCA,HNSC,LUAD,LUSC,OV,PRAD,UCEC	hsa.miR.486	HALLMARK_COMPLEMENT	0.0253035
BLCA,HNSC,LUAD,OV	hsa.miR.1227	HALLMARK_KRAS_SIGNALING_DN	0.0455996
BLCA,BRCA,ESCA,LUAD,LUSC,PRAD	hsa.miR.449a	HALLMARK_COAGULATION	0.00398062
BLCA,BRCA,ESCA,LIHC,LUSC,PRAD	hsa.miR.5683	HALLMARK_MYOGENESIS	0.000692308
BLCA,BRCA,CESC,ESCA,HNSC,LUAD,LUSC,PAAD	hsa.miR.6510	HALLMARK_FATTY_ACID_METABOLISM	0.0277639
BLCA	hsa.miR.15a	HALLMARK_SPERMATOGENESIS	0.0307798
BLCA	hsa.miR.4647	HALLMARK_COAGULATION	0.0455996
BLCA	hsa.miR.4647	HALLMARK_HEME_METABOLISM	0.0455996
BLCA	hsa.miR.4732	HALLMARK_SPERMATOGENESIS	0.0307798
BLCA,UCEC	hsa.miR.4733	HALLMARK_APICAL_SURFACE	0.0399309
BLCA,UCEC	hsa.miR.6818	HALLMARK_CHOLESTEROL_HOMEOSTASIS	0.0168719
BLCA,BRCA,LUAD,UCEC	hsa.miR.5579	HALLMARK_BILE_ACID_METABOLISM	0.0187494
BLCA,BRCA,HNSC,LIHC,OV	hsa.miR.203b	HALLMARK_APICAL_JUNCTION	0.0455996
BLCA	hsa.miR.6754	HALLMARK_NOTCH_SIGNALING	0.00729594
BLCA,BRCA,ESCA,LUAD,OV,UCEC	hsa.miR.3610	HALLMARK_KRAS_SIGNALING_UP	0.0455996
BLCA,LUAD	hsa.miR.320d.1	HALLMARK_KRAS_SIGNALING_UP	0.0455996
BLCA	hsa.miR.4524a	HALLMARK_BILE_ACID_METABOLISM	0.0255358
BLCA,ESCA,LUAD,PAAD,UCEC	hsa.miR.30e	HALLMARK_COAGULATION	0.0468299
BLCA,LUAD	hsa.miR.3917	HALLMARK_APICAL_SURFACE	0.0399309
BLCA,LUSC,UCEC	hsa.miR.4755	HALLMARK_XENOBIOTIC_METABOLISM	0.0455996
BLCA,CESC	hsa.miR.3920	HALLMARK_COAGULATION	0.0314637
BLCA,BRCA,DLBC,LGG,OV	hsa.miR.4443	HALLMARK_EPITHELIAL_MESENCHYMAL_TRANSITION	0.0455996
BLCA,ESCA,HNSC,LUSC,UCEC	hsa.miR.548d.1	HALLMARK_KRAS_SIGNALING_DN	0.0455996
BLCA	hsa.miR.4523	HALLMARK_SPERMATOGENESIS	0.0307798
BLCA,BRCA,CESC,ESCA,LAML,LIHC,LUSC,UCEC	hsa.miR.3136	HALLMARK_KRAS_SIGNALING_UP	0.0468434
BLCA,CESC,LUAD,UCEC	hsa.miR.125b.1	HALLMARK_APICAL_JUNCTION	0.0455996
BLCA,CESC,LUAD,UCEC	hsa.miR.125b.1	HALLMARK_EPITHELIAL_MESENCHYMAL_TRANSITION	0.0455996
BLCA,CESC,LUAD,UCEC	hsa.miR.125b.1	HALLMARK_GLYCOLYSIS	0.0455996
BLCA,CESC,LUAD,UCEC	hsa.miR.125b.1	HALLMARK_HYPOXIA	0.0455996
BLCA,ESCA,HNSC,LIHC,LUSC,UCEC	hsa.miR.4444.2	HALLMARK_APICAL_JUNCTION	0.0455996
BLCA,BRCA,ESCA,LUAD,PAAD,PRAD	hsa.miR.581	HALLMARK_MYOGENESIS	0.0090261
BLCA,BRCA,ESCA,LUAD,PAAD,PRAD	hsa.miR.581	HALLMARK_COAGULATION	0.0090261
BLCA,BRCA,HNSC	hsa.miR.4522	HALLMARK_SPERMATOGENESIS	0.0162535
BLCA,LUSC	hsa.miR.597	HALLMARK_ADIPOGENESIS	0.0455996
BLCA,HNSC,LGG,LUAD,LUSC,OV,PAAD	hsa.miR.5699	HALLMARK_PANCREAS_BETA_CELLS	0.0142659
BLCA,BRCA,ESCA,HNSC,LIHC,LUAD,LUSC,PAAD	hsa.miR.3187	HALLMARK_XENOBIOTIC_METABOLISM	0.0455996
BLCA,ESCA,LAML,LIHC,LUSC,PRAD,UCEC	hsa.miR.1284	HALLMARK_ESTROGEN_RESPONSE_EARLY	0.0383892
BLCA,ESCA,LAML,LIHC,LUSC,PRAD,UCEC	hsa.miR.1284	HALLMARK_ESTROGEN_RESPONSE_LATE	0.0383892
BLCA,BRCA,KIRC,OV,UCEC	hsa.miR.4728	HALLMARK_E2F_TARGETS	3.82627e-07
BLCA,BRCA,KIRC,OV,UCEC	hsa.miR.4728	HALLMARK_G2M_CHECKPOINT	2.22404e-06
BRCA,LUAD	hsa.miR.320e	HALLMARK_BILE_ACID_METABOLISM	0.0307283
BRCA,LUAD	hsa.miR.320e	HALLMARK_KRAS_SIGNALING_UP	0.0472176
BRCA,LGG	hsa.miR.1291	HALLMARK_ESTROGEN_RESPONSE_EARLY	0.0447881
BRCA,ESCA,LUAD,LUSC,PAAD,PRAD	hsa.miR.5687	HALLMARK_MYOGENESIS	0.00106722
BRCA,ESCA,LUAD,LUSC,PAAD,PRAD	hsa.miR.5687	HALLMARK_COAGULATION	0.00671836
BRCA,ESCA,LUAD,LUSC,PAAD,PRAD	hsa.miR.5687	HALLMARK_GLYCOLYSIS	0.023614
BRCA,ESCA,LUAD,LUSC,PAAD,PRAD,UCEC	hsa.miR.582	HALLMARK_ESTROGEN_RESPONSE_EARLY	0.0394105
BRCA,LUAD,OV,UCEC	hsa.miR.1910	HALLMARK_PROTEIN_SECRETION	0.0455996
BRCA,LUAD,OV,UCEC	hsa.miR.1910	HALLMARK_PI3K_AKT_MTOR_SIGNALING	0.0455996
BRCA,LUAD,OV,UCEC	hsa.miR.1910	HALLMARK_ALLOGRAFT_REJECTION	0.0455996
BRCA,LUAD,OV,UCEC	hsa.miR.1910	HALLMARK_APICAL_JUNCTION	0.0455996
BRCA,LUAD,OV,UCEC	hsa.miR.1910	HALLMARK_GLYCOLYSIS	0.0455996
BRCA,LUAD,OV,UCEC	hsa.miR.1910	HALLMARK_HYPOXIA	0.0455996
BRCA,LGG,LUAD,LUSC,OV,PAAD,UCEC	hsa.miR.4763	HALLMARK_SPERMATOGENESIS	0.0307798
BRCA,OV	hsa.miR.338	HALLMARK_COAGULATION	0.0455996
BRCA,OV	hsa.miR.338	HALLMARK_APOPTOSIS	0.0455996
BRCA,OV	hsa.miR.338	HALLMARK_ALLOGRAFT_REJECTION	0.0455996
BRCA,OV	hsa.miR.338	HALLMARK_COMPLEMENT	0.0455996
BRCA,ESCA,LUSC,OV	hsa.miR.3691	HALLMARK_UV_RESPONSE_UP	0.0360237
BRCA,ESCA,HNSC,LGG,LIHC,LUSC,PAAD	hsa.miR.6720	HALLMARK_KRAS_SIGNALING_DN	0.0467252
BRCA	hsa.miR.4661	HALLMARK_UV_RESPONSE_UP	0.0360237
BRCA	hsa.miR.6761	HALLMARK_ADIPOGENESIS	0.0455996
BRCA,CESC,LUSC,OV,PAAD	hsa.miR.30b	HALLMARK_UV_RESPONSE_UP	0.0360237
BRCA,LUAD,OV	hsa.miR.4758	HALLMARK_KRAS_SIGNALING_DN	0.0455996
BRCA,LAML,LUSC	hsa.miR.671	HALLMARK_HEME_METABOLISM	0.0455996
BRCA,UCEC	hsa.miR.1287	HALLMARK_APICAL_SURFACE	0.0399309
BRCA,DLBC,LGG	hsa.miR.1226	HALLMARK_KRAS_SIGNALING_DN	0.0455996
CESC,LUAD,UCEC	hsa.miR.101.2	HALLMARK_PEROXISOME	0.0161953
CESC,LUSC	hsa.miR.499a	HALLMARK_WNT_BETA_CATENIN_SIGNALING	0.0035165
CESC,ESCA,KIRC,LUSC	hsa.miR.9.3	HALLMARK_SPERMATOGENESIS	0.035328
CESC,ESCA,HNSC,KIRC,OV,UCEC	hsa.miR.375	HALLMARK_ESTROGEN_RESPONSE_EARLY	0.0285321
CESC,ESCA,HNSC	hsa.miR.4775	HALLMARK_INFLAMMATORY_RESPONSE	0.0233626
CESC,ESCA,HNSC	hsa.miR.4775	HALLMARK_KRAS_SIGNALING_DN	0.0233626
CESC,LUSC	hsa.miR.1246	HALLMARK_XENOBIOTIC_METABOLISM	0.0455996
CESC	hsa.miR.877	HALLMARK_HEDGEHOG_SIGNALING	0.0327007
CESC,LUAD	hsa.miR.624	HALLMARK_XENOBIOTIC_METABOLISM	0.0455996
CESC,LUSC	hsa.miR.4492	HALLMARK_ADIPOGENESIS	0.0455996
CESC,LUSC	hsa.miR.3174	HALLMARK_KRAS_SIGNALING_DN	0.0455996
CESC	hsa.miR.138.2	HALLMARK_ESTROGEN_RESPONSE_LATE	0.0455996
CESC,OV,UCEC	hsa.miR.6821	HALLMARK_SPERMATOGENESIS	0.0307798
CESC,HNSC,LUSC,OV	hsa.miR.7704	HALLMARK_KRAS_SIGNALING_DN	0.0455996
CESC,ESCA,HNSC,UCEC	hsa.miR.6513	HALLMARK_HEME_METABOLISM	0.0455996
CESC,LUAD	hsa.miR.1248	HALLMARK_KRAS_SIGNALING_DN	0.0455996
CESC,HNSC	hsa.miR.7845	HALLMARK_HEME_METABOLISM	0.0455996
CESC,LUSC	hsa.miR.7.2	HALLMARK_KRAS_SIGNALING_DN	0.0455996
CESC,DLBC,LUAD,UCEC	hsa.miR.551a	HALLMARK_TNFA_SIGNALING_VIA_NFKB	0.012061
CESC,KIRC,PRAD	hsa.miR.551b	HALLMARK_HEME_METABOLISM	0.0455996
DLBC,LGG,OV	hsa.miR.191	HALLMARK_EPITHELIAL_MESENCHYMAL_TRANSITION	0.0180638
DLBC,LGG,OV	hsa.miR.191	HALLMARK_WNT_BETA_CATENIN_SIGNALING	0.04269
DLBC	hsa.miR.6833	HALLMARK_HEDGEHOG_SIGNALING	0.0250798
DLBC	hsa.miR.6833	HALLMARK_APICAL_SURFACE	0.0250798
DLBC	hsa.miR.6833	HALLMARK_ALLOGRAFT_REJECTION	0.0455996
DLBC	hsa.miR.6833	HALLMARK_APICAL_JUNCTION	0.0455996
DLBC	hsa.miR.6833	HALLMARK_EPITHELIAL_MESENCHYMAL_TRANSITION	0.0455996
DLBC,LUAD,PRAD,UCEC	hsa.miR.4797	HALLMARK_KRAS_SIGNALING_DN	0.0240851
ESCA	hsa.miR.6501	HALLMARK_PI3K_AKT_MTOR_SIGNALING	0.0239398
ESCA,LIHC	hsa.miR.4680	HALLMARK_MYOGENESIS	0.0455996
ESCA,KIRC,UCEC	hsa.miR.3131	HALLMARK_HEME_METABOLISM	0.0455996
ESCA	hsa.miR.5094	HALLMARK_COAGULATION	0.0314637
ESCA,LUSC,PAAD	hsa.miR.6852	HALLMARK_KRAS_SIGNALING_UP	0.0124164
ESCA,HNSC,OV	hsa.miR.4999	HALLMARK_MYOGENESIS	0.0455996
HNSC	hsa.miR.3127	HALLMARK_MYOGENESIS	0.0020694
HNSC	hsa.miR.6718	HALLMARK_KRAS_SIGNALING_DN	0.0455996
HNSC	hsa.miR.6870	HALLMARK_COAGULATION	0.0455996
HNSC	hsa.miR.6870	HALLMARK_INFLAMMATORY_RESPONSE	0.0455996
HNSC,LUSC	hsa.miR.6512	HALLMARK_MYOGENESIS	0.0455996
KIRC,LGG	hsa.miR.765	HALLMARK_KRAS_SIGNALING_DN	0.0455996
KIRC,LIHC	hsa.miR.1537	HALLMARK_SPERMATOGENESIS	0.0307798
LAML	hsa.miR.183	HALLMARK_APICAL_JUNCTION	0.0408846
LAML	hsa.miR.183	HALLMARK_EPITHELIAL_MESENCHYMAL_TRANSITION	0.0408846
LAML	hsa.miR.29a	HALLMARK_CHOLESTEROL_HOMEOSTASIS	0.0337437
LAML	hsa.miR.29a	HALLMARK_APOPTOSIS	0.0367077
LGG,LUAD	hsa.miR.944	HALLMARK_KRAS_SIGNALING_DN	0.0020694
LGG,OV,UCEC	hsa.miR.5193	HALLMARK_EPITHELIAL_MESENCHYMAL_TRANSITION	0.0455996
LIHC	hsa.miR.19a	HALLMARK_HEME_METABOLISM	0.0455996
LIHC	hsa.miR.4735	HALLMARK_SPERMATOGENESIS	0.0307798
LIHC	hsa.miR.181b.1	HALLMARK_SPERMATOGENESIS	0.0307798
LIHC,PRAD	hsa.miR.1180	HALLMARK_INTERFERON_GAMMA_RESPONSE	0.00103846
LIHC,PRAD	hsa.miR.1180	HALLMARK_INTERFERON_ALPHA_RESPONSE	0.011409
LIHC,LUAD,OV,UCEC	hsa.miR.4326	HALLMARK_KRAS_SIGNALING_DN	0.0455996
LIHC,UCEC	hsa.miR.1307	HALLMARK_EPITHELIAL_MESENCHYMAL_TRANSITION	0.0455996
LIHC	hsa.miR.3170	HALLMARK_APICAL_SURFACE	0.0100319
LIHC	hsa.miR.181a.1	HALLMARK_KRAS_SIGNALING_UP	0.0455996
LIHC	hsa.miR.4753	HALLMARK_EPITHELIAL_MESENCHYMAL_TRANSITION	0.0455996
LIHC	hsa.miR.4753	HALLMARK_MYOGENESIS	0.0455996
LIHC,LUAD,UCEC	hsa.miR.378c	HALLMARK_KRAS_SIGNALING_DN	0.0472176
LIHC,LUAD,UCEC	hsa.miR.378c	HALLMARK_MYOGENESIS	0.0472176
LIHC	hsa.miR.18a	HALLMARK_APICAL_SURFACE	0.0100319
LUAD,OV	hsa.miR.296	HALLMARK_KRAS_SIGNALING_DN	0.0455996
LUAD,UCEC	hsa.miR.4800	HALLMARK_HEME_METABOLISM	0.0455996
LUAD,OV	hsa.miR.6813	HALLMARK_KRAS_SIGNALING_UP	0.0455996
LUAD	hsa.miR.3651	HALLMARK_SPERMATOGENESIS	0.0307798
LUAD	hsa.miR.4484	HALLMARK_HEME_METABOLISM	0.0455996
LUAD	hsa.miR.4474	HALLMARK_GLYCOLYSIS	0.0455996
LUAD,LUSC	hsa.miR.887	HALLMARK_KRAS_SIGNALING_DN	0.0455996
LUSC	hsa.miR.3934	HALLMARK_PANCREAS_BETA_CELLS	0.00911993
LUSC	hsa.miR.216b	HALLMARK_KRAS_SIGNALING_DN	0.0455996
OV,UCEC	hsa.miR.639	HALLMARK_BILE_ACID_METABOLISM	0.0255358
OV	hsa.miR.6824	HALLMARK_EPITHELIAL_MESENCHYMAL_TRANSITION	0.0455996
OV,UCEC	hsa.let.7g	HALLMARK_EPITHELIAL_MESENCHYMAL_TRANSITION	0.0455996
OV	hsa.miR.6766	HALLMARK_EPITHELIAL_MESENCHYMAL_TRANSITION	0.0455996
OV	hsa.miR.6872	HALLMARK_EPITHELIAL_MESENCHYMAL_TRANSITION	0.0455996
PAAD	hsa.miR.133a.1	HALLMARK_ADIPOGENESIS	0.0101214
PAAD	hsa.miR.1.2	HALLMARK_ADIPOGENESIS	0.0292033
PAAD	hsa.miR.1.2	HALLMARK_KRAS_SIGNALING_UP	0.0292033
PRAD	hsa.miR.550a.2	HALLMARK_SPERMATOGENESIS	0.0307798
PRAD,UCEC	hsa.miR.3157	HALLMARK_APICAL_JUNCTION	0.0455996
UCEC	hsa.miR.5582	HALLMARK_COMPLEMENT	0.0485385
UCEC	hsa.miR.607	HALLMARK_HEME_METABOLISM	0.0455996
UCEC	hsa.miR.3158.1	HALLMARK_APICAL_JUNCTION	0.0455996
UCEC	hsa.miR.4685	HALLMARK_APICAL_JUNCTION	0.0455996
UCEC	hsa.miR.135b	HALLMARK_HYPOXIA	0.0455996

## Sheet: REACTOME PATHWAYS
ENRICHED REACTOME PATHWAYS IN THE TARGETS OF MIRNAS
Cancer Types	miRNA	REACTOME ID	Pathway
ACC	hsa.miR.1538	R-HSA-168256	Immune System
ACC	hsa.miR.1538	R-HSA-168249	Innate Immune System
ACC	hsa.miR.1538	R-HSA-162582	Signal Transduction
ACC	hsa.miR.1538	R-HSA-1280215	Cytokine Signaling in Immune system
ACC,BLCA,BRCA,LAML,LUSC	hsa.miR.153.2	R-HSA-8854691	Interleukin-20 family signaling
ACC,BLCA,BRCA,ESCA,HNSC,LUAD,LUSC	hsa.miR.6502	R-HSA-6809371	Formation of the cornified envelope
ACC,OV	hsa.miR.6880	R-HSA-1266738	Developmental Biology
ACC,LGG,LUAD	hsa.miR.1228	R-HSA-2559586	DNA Damage/Telomere Stress Induced Senescence
ACC,LGG,LUAD	hsa.miR.1228	R-HSA-449147	Signaling by Interleukins
ACC,LGG,LUAD	hsa.miR.1228	R-HSA-2559583	Cellular Senescence
ACC,DLBC	hsa.miR.200b	R-HSA-913709	O-linked glycosylation of mucins
ACC,DLBC	hsa.miR.200b	R-HSA-5173105	O-linked glycosylation
ACC,DLBC	hsa.miR.200b	R-HSA-5083636	Defective GALNT12 causes colorectal cancer 1 (CRCS1)
ACC,DLBC	hsa.miR.200b	R-HSA-5083625	Defective GALNT3 causes familial hyperphosphatemic tumoral calcinosis (HFTC)
ACC,DLBC	hsa.miR.200b	R-HSA-5083632	Defective C1GALT1C1 causes Tn polyagglutination syndrome (TNPS)
ACC,DLBC	hsa.miR.200b	R-HSA-977068	Termination of O-glycan biosynthesis
ACC,DLBC	hsa.miR.200b	R-HSA-5621480	Dectin-2 family
ACC,DLBC	hsa.miR.200b	R-HSA-5683826	Surfactant metabolism
ACC,DLBC	hsa.miR.200b	R-HSA-392499	Metabolism of proteins
ACC,DLBC	hsa.miR.200b	R-HSA-3906995	Diseases associated with O-glycosylation of proteins
ACC,DLBC	hsa.miR.429	R-HSA-5683826	Surfactant metabolism
ACC,DLBC	hsa.miR.429	R-HSA-1474228	Degradation of the extracellular matrix
ACC,DLBC	hsa.miR.429	R-HSA-5083636	Defective GALNT12 causes colorectal cancer 1 (CRCS1)
ACC,DLBC	hsa.miR.429	R-HSA-5083625	Defective GALNT3 causes familial hyperphosphatemic tumoral calcinosis (HFTC)
ACC,DLBC	hsa.miR.429	R-HSA-5083632	Defective C1GALT1C1 causes Tn polyagglutination syndrome (TNPS)
ACC,DLBC	hsa.miR.200a	R-HSA-913709	O-linked glycosylation of mucins
ACC,DLBC	hsa.miR.200a	R-HSA-5173105	O-linked glycosylation
ACC,DLBC	hsa.miR.200a	R-HSA-5083636	Defective GALNT12 causes colorectal cancer 1 (CRCS1)
ACC,DLBC	hsa.miR.200a	R-HSA-5083625	Defective GALNT3 causes familial hyperphosphatemic tumoral calcinosis (HFTC)
ACC,DLBC	hsa.miR.200a	R-HSA-5083632	Defective C1GALT1C1 causes Tn polyagglutination syndrome (TNPS)
ACC,DLBC	hsa.miR.200a	R-HSA-168249	Innate Immune System
BLCA,BRCA,LUAD	hsa.miR.16.1	R-HSA-382551	Transport of small molecules
BLCA,LUAD	hsa.miR.3613	R-HSA-73728	RNA Polymerase I Promoter Opening
BLCA,LUAD	hsa.miR.3613	R-HSA-5334118	DNA methylation
BLCA,LUAD	hsa.miR.3613	R-HSA-3214815	HDACs deacetylate histones
BLCA,LUAD	hsa.miR.3613	R-HSA-5625886	Activated PKN1 stimulates transcription of AR (androgen receptor) regulated genes KLK2 and KLK3
BLCA,LUAD	hsa.miR.3613	R-HSA-427359	SIRT1 negatively regulates rRNA expression
BLCA,LUAD	hsa.miR.3613	R-HSA-212300	PRC2 methylates histones and DNA
BLCA,LUAD	hsa.miR.3613	R-HSA-2299718	Condensation of Prophase Chromosomes
BLCA,LUAD	hsa.miR.3613	R-HSA-427389	ERCC6 (CSB) and EHMT2 (G9a) positively regulate rRNA expression
BLCA,LUAD	hsa.miR.3613	R-HSA-1500620	Meiosis
BLCA,LUAD	hsa.miR.3613	R-HSA-912446	Meiotic recombination
BLCA,LUAD	hsa.miR.3613	R-HSA-9616222	Transcriptional regulation of granulopoiesis
BLCA,LUAD	hsa.miR.3613	R-HSA-5250924	B-WICH complex positively regulates rRNA expression
BLCA,LUAD	hsa.miR.3613	R-HSA-1221632	Meiotic synapsis
BLCA,LUAD	hsa.miR.3613	R-HSA-73772	RNA Polymerase I Promoter Escape
BLCA,LUAD	hsa.miR.3613	R-HSA-201722	Formation of the beta-catenin:TCF transactivating complex
BLCA,LUAD	hsa.miR.3613	R-HSA-171306	Packaging Of Telomere Ends
BLCA,LUAD	hsa.miR.3613	R-HSA-5625740	RHO GTPases activate PKNs
BLCA,LUAD	hsa.miR.3613	R-HSA-3214847	HATs acetylate histones
BLCA,LUAD	hsa.miR.3613	R-HSA-8936459	RUNX1 regulates genes involved in megakaryocyte differentiation and platelet function
BLCA,LUAD	hsa.miR.3613	R-HSA-110331	Cleavage of the damaged purine
BLCA,LUAD	hsa.miR.3613	R-HSA-73927	Depurination
BLCA,LUAD	hsa.miR.3613	R-HSA-110330	Recognition and association of DNA glycosylase with site containing an affected purine
BLCA,LUAD	hsa.miR.3613	R-HSA-1474165	Reproduction
BLCA,LUAD	hsa.miR.3613	R-HSA-1912408	Pre-NOTCH Transcription and Translation
BLCA,LUAD	hsa.miR.3613	R-HSA-5250913	Positive epigenetic regulation of rRNA expression
BLCA,LUAD	hsa.miR.3613	R-HSA-5578749	Transcriptional regulation by small RNAs
BLCA,LUAD	hsa.miR.3613	R-HSA-110329	Cleavage of the damaged pyrimidine
BLCA,LUAD	hsa.miR.3613	R-HSA-73928	Depyrimidination
BLCA,LUAD	hsa.miR.3613	R-HSA-110328	Recognition and association of DNA glycosylase with site containing an affected pyrimidine
BLCA,LUAD	hsa.miR.3613	R-HSA-427413	NoRC negatively regulates rRNA expression
BLCA,LUAD	hsa.miR.3613	R-HSA-977225	Amyloid fiber formation
BLCA,LUAD	hsa.miR.3613	R-HSA-73929	Base-Excision Repair, AP Site Formation
BLCA,LUAD	hsa.miR.3613	R-HSA-73854	RNA Polymerase I Promoter Clearance
BLCA,LUAD	hsa.miR.3613	R-HSA-2559582	Senescence-Associated Secretory Phenotype (SASP)
BLCA,LUAD	hsa.miR.3613	R-HSA-73864	RNA Polymerase I Transcription
BLCA,LUAD	hsa.miR.3613	R-HSA-5250941	Negative epigenetic regulation of rRNA expression
BLCA,LUAD	hsa.miR.3613	R-HSA-1912422	Pre-NOTCH Expression and Processing
BLCA,LUAD	hsa.miR.3613	R-HSA-5619507	Activation of HOX genes during differentiation
BLCA,LUAD	hsa.miR.3613	R-HSA-5617472	Activation of anterior HOX genes in hindbrain development during early embryogenesis
BLCA,LUAD	hsa.miR.3613	R-HSA-2559580	Oxidative Stress Induced Senescence
BLCA,LUAD	hsa.miR.3613	R-HSA-606279	Deposition of new CENPA-containing nucleosomes at the centromere
BLCA,LUAD	hsa.miR.3613	R-HSA-774815	Nucleosome assembly
BLCA,LUAD	hsa.miR.3613	R-HSA-8939236	RUNX1 regulates transcription of genes involved in differentiation of HSCs
BLCA,LUAD	hsa.miR.3613	R-HSA-2559586	DNA Damage/Telomere Stress Induced Senescence
BLCA,LUAD	hsa.miR.3613	R-HSA-211000	Gene Silencing by RNA
BLCA,LUAD	hsa.miR.3613	R-HSA-157579	Telomere Maintenance
BLCA,LUAD	hsa.miR.3613	R-HSA-68875	Mitotic Prophase
BLCA,LUAD	hsa.miR.3613	R-HSA-212165	Epigenetic regulation of gene expression
BLCA,LUAD	hsa.miR.3613	R-HSA-9018519	Estrogen-dependent gene expression
BLCA,LUAD	hsa.miR.3613	R-HSA-73884	Base Excision Repair
BLCA,LUAD	hsa.miR.3613	R-HSA-201681	TCF dependent signaling in response to WNT
BLCA,LUAD	hsa.miR.3613	R-HSA-73886	Chromosome Maintenance
BLCA,LUAD	hsa.miR.3613	R-HSA-3214858	RMTs methylate histone arginines
BLCA,LUAD	hsa.miR.3613	R-HSA-3247509	Chromatin modifying enzymes
BLCA,LUAD	hsa.miR.3613	R-HSA-4839726	Chromatin organization
BLCA,LUAD	hsa.miR.3613	R-HSA-2559583	Cellular Senescence
BLCA,LUAD	hsa.miR.3613	R-HSA-8939211	ESR-mediated signaling
BLCA,LUAD	hsa.miR.3613	R-HSA-195721	Signaling by WNT
BLCA,LUAD	hsa.miR.3613	R-HSA-157118	Signaling by NOTCH
BLCA,LUAD	hsa.miR.3613	R-HSA-8878171	Transcriptional regulation by RUNX1
BLCA,LUAD	hsa.miR.3613	R-HSA-9006931	Signaling by Nuclear Receptors
BLCA,LUAD	hsa.miR.3613	R-HSA-195258	RHO GTPase Effectors
BLCA,LUAD	hsa.miR.3613	R-HSA-5693571	Nonhomologous End-Joining (NHEJ)
BLCA,LUAD	hsa.miR.3613	R-HSA-5689880	Ub-specific processing proteases
BLCA,LUAD	hsa.miR.3613	R-HSA-5693565	Recruitment and ATM-mediated phosphorylation of repair and signaling proteins at DNA double strand breaks
BLCA,LUAD	hsa.miR.3613	R-HSA-5693606	DNA Double Strand Break Response
BLCA	hsa.miR.1976	R-HSA-445355	Smooth Muscle Contraction
BLCA,BRCA,CESC,ESCA,LGG,LIHC,LUAD,UCEC	hsa.miR.100	R-HSA-5690714	CD22 mediated BCR regulation
BLCA,BRCA,CESC,ESCA,LGG,LIHC,LUAD,UCEC	hsa.miR.100	R-HSA-173623	Classical antibody-mediated complement activation
BLCA,BRCA,CESC,ESCA,LGG,LIHC,LUAD,UCEC	hsa.miR.100	R-HSA-2730905	Role of LAT2/NTAL/LAB on calcium mobilization
BLCA,BRCA,CESC,ESCA,LGG,LIHC,LUAD,UCEC	hsa.miR.100	R-HSA-2168880	Scavenging of heme from plasma
BLCA,BRCA,CESC,ESCA,LGG,LIHC,LUAD,UCEC	hsa.miR.100	R-HSA-2029481	FCGR activation
BLCA,BRCA,CESC,ESCA,LGG,LIHC,LUAD,UCEC	hsa.miR.100	R-HSA-983695	Antigen activates B Cell Receptor (BCR) leading to generation of second messengers
BLCA,BRCA,CESC,ESCA,LGG,LIHC,LUAD,UCEC	hsa.miR.100	R-HSA-166786	Creation of C4 and C2 activators
BLCA,BRCA,CESC,ESCA,LGG,LIHC,LUAD,UCEC	hsa.miR.100	R-HSA-166663	Initial triggering of complement
BLCA,BRCA,CESC,ESCA,LGG,LIHC,LUAD,UCEC	hsa.miR.100	R-HSA-2871809	FCERI mediated Ca+2 mobilization
BLCA,BRCA,CESC,ESCA,LGG,LIHC,LUAD,UCEC	hsa.miR.100	R-HSA-2029485	Role of phospholipids in phagocytosis
BLCA,BRCA,CESC,ESCA,LGG,LIHC,LUAD,UCEC	hsa.miR.100	R-HSA-2871796	FCERI mediated MAPK activation
BLCA,BRCA,CESC,ESCA,LGG,LIHC,LUAD,UCEC	hsa.miR.100	R-HSA-2173782	Binding and Uptake of Ligands by Scavenger Receptors
BLCA,BRCA,CESC,ESCA,LGG,LIHC,LUAD,UCEC	hsa.miR.100	R-HSA-977606	Regulation of Complement cascade
BLCA,BRCA,CESC,ESCA,LGG,LIHC,LUAD,UCEC	hsa.miR.100	R-HSA-166658	Complement cascade
BLCA,BRCA,CESC,ESCA,LGG,LIHC,LUAD,UCEC	hsa.miR.100	R-HSA-2029482	Regulation of actin dynamics for phagocytic cup formation
BLCA,BRCA,CESC,ESCA,LGG,LIHC,LUAD,UCEC	hsa.miR.100	R-HSA-2871837	FCERI mediated NF-kB activation
BLCA,BRCA,CESC,ESCA,LGG,LIHC,LUAD,UCEC	hsa.miR.100	R-HSA-2029480	Fcgamma receptor (FCGR) dependent phagocytosis
BLCA,BRCA,CESC,ESCA,LGG,LIHC,LUAD,UCEC	hsa.miR.100	R-HSA-983705	Signaling by the B Cell Receptor (BCR)
BLCA,BRCA,CESC,ESCA,LGG,LIHC,LUAD,UCEC	hsa.miR.100	R-HSA-2454202	Fc epsilon receptor (FCERI) signaling
BLCA,HNSC,LUAD,LUSC,PAAD	hsa.miR.873	R-HSA-8935690	Digestion
BLCA,HNSC,LUAD,LUSC,PAAD	hsa.miR.873	R-HSA-8963743	Digestion and absorption
BLCA,HNSC,LUAD,LUSC,PAAD	hsa.miR.873	R-HSA-192456	Digestion of dietary lipid
BLCA,LAML,UCEC	hsa.miR.4724	R-HSA-75105	Fatty acyl-CoA biosynthesis
BLCA,UCEC	hsa.miR.423	R-HSA-1474244	Extracellular matrix organization
BLCA,ESCA,HNSC,LUAD,LUSC,OV,PRAD,UCEC	hsa.miR.486	R-HSA-392499	Metabolism of proteins
BLCA,ESCA,HNSC,LUAD,LUSC,OV,PRAD,UCEC	hsa.miR.486	R-HSA-975634	Retinoid metabolism and transport
BLCA,ESCA,HNSC,LUAD,LUSC,OV,PRAD,UCEC	hsa.miR.486	R-HSA-6806667	Metabolism of fat-soluble vitamins
BLCA,ESCA,HNSC,LUAD,LUSC,OV,PRAD,UCEC	hsa.miR.486	R-HSA-597592	Post-translational protein modification
BLCA,ESCA,HNSC,LUAD,LUSC,OV,PRAD,UCEC	hsa.miR.486	R-HSA-2187338	Visual phototransduction
BLCA,BRCA,ESCA,LIHC,LUSC,PRAD	hsa.miR.5683	R-HSA-382551	Transport of small molecules
BLCA,BRCA,CESC,ESCA,HNSC,LUAD,LUSC,PAAD	hsa.miR.6510	R-HSA-211859	Biological oxidations
BLCA,BRCA,CESC,ESCA,HNSC,LUAD,LUSC,PAAD	hsa.miR.6510	R-HSA-211945	Phase I - Functionalization of compounds
BLCA,BRCA,CESC,ESCA,HNSC,LUAD,LUSC,PAAD	hsa.miR.6510	R-HSA-1430728	Metabolism
BLCA,BRCA,CESC,ESCA,HNSC,LUAD,LUSC,PAAD	hsa.miR.6510	R-HSA-556833	Metabolism of lipids
BLCA,BRCA,LUAD	hsa.miR.320d.1	R-HSA-1500620	Meiosis
BLCA,BRCA,LUAD	hsa.miR.320d.1	R-HSA-1474165	Reproduction
BLCA,BRCA,LUAD	hsa.miR.320d.1	R-HSA-73728	RNA Polymerase I Promoter Opening
BLCA,BRCA,LUAD	hsa.miR.320d.1	R-HSA-5334118	DNA methylation
BLCA,BRCA,LUAD	hsa.miR.320d.1	R-HSA-5625886	Activated PKN1 stimulates transcription of AR (androgen receptor) regulated genes KLK2 and KLK3
BLCA,BRCA,LUAD	hsa.miR.320d.1	R-HSA-427359	SIRT1 negatively regulates rRNA expression
BLCA,BRCA,LUAD	hsa.miR.320d.1	R-HSA-212300	PRC2 methylates histones and DNA
BLCA,BRCA,LUAD	hsa.miR.320d.1	R-HSA-2299718	Condensation of Prophase Chromosomes
BLCA,BRCA,LUAD	hsa.miR.320d.1	R-HSA-427389	ERCC6 (CSB) and EHMT2 (G9a) positively regulate rRNA expression
BLCA,BRCA,LUAD	hsa.miR.320d.1	R-HSA-912446	Meiotic recombination
BLCA,BRCA,LUAD	hsa.miR.320d.1	R-HSA-9616222	Transcriptional regulation of granulopoiesis
BLCA,BRCA,LUAD	hsa.miR.320d.1	R-HSA-5250924	B-WICH complex positively regulates rRNA expression
BLCA,BRCA,LUAD	hsa.miR.320d.1	R-HSA-3214815	HDACs deacetylate histones
BLCA,BRCA,LUAD	hsa.miR.320d.1	R-HSA-1221632	Meiotic synapsis
BLCA,BRCA,LUAD	hsa.miR.320d.1	R-HSA-73772	RNA Polymerase I Promoter Escape
BLCA,BRCA,LUAD	hsa.miR.320d.1	R-HSA-201722	Formation of the beta-catenin:TCF transactivating complex
BLCA,BRCA,LUAD	hsa.miR.320d.1	R-HSA-5625740	RHO GTPases activate PKNs
BLCA,BRCA,LUAD	hsa.miR.320d.1	R-HSA-8936459	RUNX1 regulates genes involved in megakaryocyte differentiation and platelet function
BLCA,LAML,UCEC	hsa.miR.365b	R-HSA-1266738	Developmental Biology
BLCA,LAML,UCEC	hsa.miR.365b	R-HSA-162582	Signal Transduction
BLCA,LAML,UCEC	hsa.miR.365b	R-HSA-422475	Axon guidance
BLCA,LAML,UCEC	hsa.miR.365b	R-HSA-400042	Adrenaline,noradrenaline inhibits insulin secretion
BLCA,LAML,UCEC	hsa.miR.365b	R-HSA-373760	L1CAM interactions
BLCA,LAML,UCEC	hsa.miR.365b	R-HSA-112316	Neuronal System
BLCA,LAML,UCEC	hsa.miR.365b	R-HSA-372790	Signaling by GPCR
BLCA,LAML,UCEC	hsa.miR.365b	R-HSA-500792	GPCR ligand binding
BLCA,LAML,UCEC	hsa.miR.365b	R-HSA-5576891	Cardiac conduction
BLCA,ESCA,LUAD,PAAD,UCEC	hsa.miR.30c.1	R-HSA-168256	Immune System
BLCA,BRCA	hsa.miR.449b	R-HSA-1643685	Disease
BLCA,BRCA,CESC,ESCA,LAML,LIHC,LUSC,UCEC	hsa.miR.3136	R-HSA-162582	Signal Transduction
BLCA,BRCA,ESCA,LUAD,PAAD,PRAD	hsa.miR.581	R-HSA-166663	Initial triggering of complement
BLCA,BRCA,ESCA,LUAD,PAAD,PRAD	hsa.miR.581	R-HSA-381426	Regulation of Insulin-like Growth Factor (IGF) transport and uptake by Insulin-like Growth Factor Binding Proteins (IGFBPs)
BLCA,BRCA,ESCA,LUAD,PAAD,PRAD	hsa.miR.581	R-HSA-109582	Hemostasis
BLCA,BRCA,ESCA,LUAD,PAAD,PRAD	hsa.miR.581	R-HSA-166658	Complement cascade
BLCA,BRCA,ESCA,LUAD,PAAD,PRAD	hsa.miR.581	R-HSA-8957275	Post-translational protein phosphorylation
BLCA,BRCA,ESCA,LUAD,PAAD,PRAD	hsa.miR.581	R-HSA-977606	Regulation of Complement cascade
BLCA,BRCA,ESCA,LUAD,PAAD,PRAD	hsa.miR.581	R-HSA-397014	Muscle contraction
BLCA,BRCA,ESCA,LUAD,PAAD,PRAD	hsa.miR.581	R-HSA-112316	Neuronal System
BLCA,BRCA,ESCA,LUAD,PAAD,PRAD	hsa.miR.581	R-HSA-202733	Cell surface interactions at the vascular wall
BLCA,BRCA,ESCA,LUAD,PAAD,PRAD	hsa.miR.581	R-HSA-168256	Immune System
BLCA,CESC,HNSC,LUAD,LUSC,OV	hsa.miR.3193	R-HSA-388396	GPCR downstream signalling
BLCA,CESC,HNSC,LUAD,LUSC,OV	hsa.miR.3193	R-HSA-162582	Signal Transduction
BLCA,CESC,HNSC,LUAD,LUSC,OV	hsa.miR.3193	R-HSA-372790	Signaling by GPCR
BLCA,CESC,HNSC,LUAD,LUSC,OV	hsa.miR.3193	R-HSA-373076	Class A/1 (Rhodopsin-like receptors)
BLCA,CESC,HNSC,LUAD,LUSC,OV	hsa.miR.3193	R-HSA-418594	G alpha (i) signalling events
BLCA,CESC,HNSC,LUAD,LUSC,OV	hsa.miR.3193	R-HSA-500792	GPCR ligand binding
BLCA,CESC,HNSC,LUAD,LUSC,OV	hsa.miR.3193	R-HSA-629587	Highly sodium permeable acetylcholine nicotinic receptors
BLCA,CESC,HNSC,LUAD,LUSC,OV	hsa.miR.3193	R-HSA-622323	Presynaptic nicotinic acetylcholine receptors
BLCA,CESC,HNSC,LUAD,LUSC,OV	hsa.miR.3193	R-HSA-390666	Serotonin receptors
BLCA,CESC,HNSC,LUAD,LUSC,OV	hsa.miR.3193	R-HSA-181431	Acetylcholine binding and downstream events
BLCA,CESC,HNSC,LUAD,LUSC,OV	hsa.miR.3193	R-HSA-622327	Postsynaptic nicotinic acetylcholine receptors
BLCA,BRCA,PAAD,UCEC	hsa.miR.744	R-HSA-500792	GPCR ligand binding
BLCA,BRCA,PAAD,UCEC	hsa.miR.744	R-HSA-372790	Signaling by GPCR
BLCA,BRCA,PAAD,UCEC	hsa.miR.744	R-HSA-162582	Signal Transduction
BLCA,BRCA,PAAD,UCEC	hsa.miR.744	R-HSA-388396	GPCR downstream signalling
BLCA,BRCA,PAAD,UCEC	hsa.miR.744	R-HSA-373076	Class A/1 (Rhodopsin-like receptors)
BLCA,BRCA,PAAD,UCEC	hsa.miR.744	R-HSA-418594	G alpha (i) signalling events
BLCA,BRCA,PAAD,UCEC	hsa.miR.744	R-HSA-8957275	Post-translational protein phosphorylation
BLCA,BRCA,PAAD,UCEC	hsa.miR.744	R-HSA-381426	Regulation of Insulin-like Growth Factor (IGF) transport and uptake by Insulin-like Growth Factor Binding Proteins (IGFBPs)
BLCA,BRCA,PAAD,UCEC	hsa.miR.744	R-HSA-418555	G alpha (s) signalling events
BLCA,BRCA,PAAD,UCEC	hsa.miR.744	R-HSA-375276	Peptide ligand-binding receptors
BLCA,HNSC,LGG,LUAD,LUSC,OV,PAAD	hsa.miR.5699	R-HSA-418594	G alpha (i) signalling events
BLCA,HNSC,LGG,LUAD,LUSC,OV,PAAD	hsa.miR.5699	R-HSA-500792	GPCR ligand binding
BLCA,HNSC,LGG,LUAD,LUSC,OV,PAAD	hsa.miR.5699	R-HSA-373076	Class A/1 (Rhodopsin-like receptors)
BLCA,HNSC,LGG,LUAD,LUSC,OV,PAAD	hsa.miR.5699	R-HSA-388396	GPCR downstream signalling
BLCA,HNSC,LGG,LUAD,LUSC,OV,PAAD	hsa.miR.5699	R-HSA-372790	Signaling by GPCR
BLCA,HNSC,LGG,LUAD,LUSC,OV,PAAD	hsa.miR.5699	R-HSA-162582	Signal Transduction
BLCA,HNSC,LGG,LUAD,LUSC,OV,PAAD	hsa.miR.5699	R-HSA-8939245	RUNX1 regulates transcription of genes involved in BCR signaling
BLCA,HNSC,LGG,LUAD,LUSC,OV,PAAD	hsa.miR.5699	R-HSA-375276	Peptide ligand-binding receptors
BLCA,BRCA,CESC,HNSC,LIHC,LUAD,LUSC,PAAD,UCEC	hsa.miR.3667	R-HSA-3214815	HDACs deacetylate histones
BLCA,BRCA,CESC,HNSC,LIHC,LUAD,LUSC,PAAD,UCEC	hsa.miR.3667	R-HSA-73728	RNA Polymerase I Promoter Opening
BLCA,BRCA,CESC,HNSC,LIHC,LUAD,LUSC,PAAD,UCEC	hsa.miR.3667	R-HSA-5334118	DNA methylation
BLCA,BRCA,CESC,HNSC,LIHC,LUAD,LUSC,PAAD,UCEC	hsa.miR.3667	R-HSA-5625886	Activated PKN1 stimulates transcription of AR (androgen receptor) regulated genes KLK2 and KLK3
BLCA,BRCA,CESC,HNSC,LIHC,LUAD,LUSC,PAAD,UCEC	hsa.miR.3667	R-HSA-427359	SIRT1 negatively regulates rRNA expression
BLCA,BRCA,CESC,HNSC,LIHC,LUAD,LUSC,PAAD,UCEC	hsa.miR.3667	R-HSA-212300	PRC2 methylates histones and DNA
BLCA,BRCA,CESC,HNSC,LIHC,LUAD,LUSC,PAAD,UCEC	hsa.miR.3667	R-HSA-2299718	Condensation of Prophase Chromosomes
BLCA,BRCA,CESC,HNSC,LIHC,LUAD,LUSC,PAAD,UCEC	hsa.miR.3667	R-HSA-427389	ERCC6 (CSB) and EHMT2 (G9a) positively regulate rRNA expression
BLCA,BRCA,CESC,HNSC,LIHC,LUAD,LUSC,PAAD,UCEC	hsa.miR.3667	R-HSA-3214847	HATs acetylate histones
BLCA,BRCA,CESC,HNSC,LIHC,LUAD,LUSC,PAAD,UCEC	hsa.miR.3667	R-HSA-171306	Packaging Of Telomere Ends
BLCA,BRCA,CESC,HNSC,LIHC,LUAD,LUSC,PAAD,UCEC	hsa.miR.3667	R-HSA-912446	Meiotic recombination
BLCA,BRCA,CESC,HNSC,LIHC,LUAD,LUSC,PAAD,UCEC	hsa.miR.3667	R-HSA-9616222	Transcriptional regulation of granulopoiesis
BLCA,BRCA,CESC,HNSC,LIHC,LUAD,LUSC,PAAD,UCEC	hsa.miR.3667	R-HSA-5250924	B-WICH complex positively regulates rRNA expression
BLCA,BRCA,CESC,HNSC,LIHC,LUAD,LUSC,PAAD,UCEC	hsa.miR.3667	R-HSA-73772	RNA Polymerase I Promoter Escape
BLCA,BRCA,CESC,HNSC,LIHC,LUAD,LUSC,PAAD,UCEC	hsa.miR.3667	R-HSA-2559586	DNA Damage/Telomere Stress Induced Senescence
BLCA,BRCA,CESC,HNSC,LIHC,LUAD,LUSC,PAAD,UCEC	hsa.miR.3667	R-HSA-201722	Formation of the beta-catenin:TCF transactivating complex
BLCA,BRCA,CESC,HNSC,LIHC,LUAD,LUSC,PAAD,UCEC	hsa.miR.3667	R-HSA-110331	Cleavage of the damaged purine
BLCA,BRCA,CESC,HNSC,LIHC,LUAD,LUSC,PAAD,UCEC	hsa.miR.3667	R-HSA-73927	Depurination
BLCA,BRCA,CESC,HNSC,LIHC,LUAD,LUSC,PAAD,UCEC	hsa.miR.3667	R-HSA-110330	Recognition and association of DNA glycosylase with site containing an affected purine
BLCA,BRCA,CESC,HNSC,LIHC,LUAD,LUSC,PAAD,UCEC	hsa.miR.3667	R-HSA-5625740	RHO GTPases activate PKNs
BLCA,BRCA,CESC,HNSC,LIHC,LUAD,LUSC,PAAD,UCEC	hsa.miR.3667	R-HSA-8936459	RUNX1 regulates genes involved in megakaryocyte differentiation and platelet function
BLCA,BRCA,CESC,HNSC,LIHC,LUAD,LUSC,PAAD,UCEC	hsa.miR.3667	R-HSA-110329	Cleavage of the damaged pyrimidine
BLCA,BRCA,CESC,HNSC,LIHC,LUAD,LUSC,PAAD,UCEC	hsa.miR.3667	R-HSA-73928	Depyrimidination
BLCA,BRCA,CESC,HNSC,LIHC,LUAD,LUSC,PAAD,UCEC	hsa.miR.3667	R-HSA-110328	Recognition and association of DNA glycosylase with site containing an affected pyrimidine
BLCA,BRCA,CESC,HNSC,LIHC,LUAD,LUSC,PAAD,UCEC	hsa.miR.3667	R-HSA-73929	Base-Excision Repair, AP Site Formation
BLCA,BRCA,CESC,HNSC,LIHC,LUAD,LUSC,PAAD,UCEC	hsa.miR.3667	R-HSA-1912408	Pre-NOTCH Transcription and Translation
BLCA,BRCA,CESC,HNSC,LIHC,LUAD,LUSC,PAAD,UCEC	hsa.miR.3667	R-HSA-5250913	Positive epigenetic regulation of rRNA expression
BLCA,BRCA,CESC,HNSC,LIHC,LUAD,LUSC,PAAD,UCEC	hsa.miR.3667	R-HSA-5578749	Transcriptional regulation by small RNAs
BLCA,BRCA,CESC,HNSC,LIHC,LUAD,LUSC,PAAD,UCEC	hsa.miR.3667	R-HSA-427413	NoRC negatively regulates rRNA expression
BLCA,BRCA,CESC,HNSC,LIHC,LUAD,LUSC,PAAD,UCEC	hsa.miR.3667	R-HSA-977225	Amyloid fiber formation
BLCA,BRCA,CESC,HNSC,LIHC,LUAD,LUSC,PAAD,UCEC	hsa.miR.3667	R-HSA-73854	RNA Polymerase I Promoter Clearance
BLCA,BRCA,CESC,HNSC,LIHC,LUAD,LUSC,PAAD,UCEC	hsa.miR.3667	R-HSA-2559582	Senescence-Associated Secretory Phenotype (SASP)
BLCA,BRCA,CESC,HNSC,LIHC,LUAD,LUSC,PAAD,UCEC	hsa.miR.3667	R-HSA-73864	RNA Polymerase I Transcription
BLCA,BRCA,CESC,HNSC,LIHC,LUAD,LUSC,PAAD,UCEC	hsa.miR.3667	R-HSA-5250941	Negative epigenetic regulation of rRNA expression
BLCA,BRCA,CESC,HNSC,LIHC,LUAD,LUSC,PAAD,UCEC	hsa.miR.3667	R-HSA-606279	Deposition of new CENPA-containing nucleosomes at the centromere
BLCA,BRCA,CESC,HNSC,LIHC,LUAD,LUSC,PAAD,UCEC	hsa.miR.3667	R-HSA-774815	Nucleosome assembly
BLCA,BRCA,CESC,HNSC,LIHC,LUAD,LUSC,PAAD,UCEC	hsa.miR.3667	R-HSA-1500620	Meiosis
BLCA,BRCA,CESC,HNSC,LIHC,LUAD,LUSC,PAAD,UCEC	hsa.miR.3667	R-HSA-1912422	Pre-NOTCH Expression and Processing
BLCA,BRCA,CESC,HNSC,LIHC,LUAD,LUSC,PAAD,UCEC	hsa.miR.3667	R-HSA-5619507	Activation of HOX genes during differentiation
BLCA,BRCA,CESC,HNSC,LIHC,LUAD,LUSC,PAAD,UCEC	hsa.miR.3667	R-HSA-5617472	Activation of anterior HOX genes in hindbrain development during early embryogenesis
BLCA,BRCA,CESC,HNSC,LIHC,LUAD,LUSC,PAAD,UCEC	hsa.miR.3667	R-HSA-2559580	Oxidative Stress Induced Senescence
BLCA,BRCA,CESC,HNSC,LIHC,LUAD,LUSC,PAAD,UCEC	hsa.miR.3667	R-HSA-1221632	Meiotic synapsis
BLCA,BRCA,CESC,HNSC,LIHC,LUAD,LUSC,PAAD,UCEC	hsa.miR.3667	R-HSA-8939236	RUNX1 regulates transcription of genes involved in differentiation of HSCs
BLCA,BRCA,CESC,HNSC,LIHC,LUAD,LUSC,PAAD,UCEC	hsa.miR.3667	R-HSA-157579	Telomere Maintenance
BLCA,BRCA,CESC,HNSC,LIHC,LUAD,LUSC,PAAD,UCEC	hsa.miR.3667	R-HSA-211000	Gene Silencing by RNA
BLCA,BRCA,CESC,HNSC,LIHC,LUAD,LUSC,PAAD,UCEC	hsa.miR.3667	R-HSA-68875	Mitotic Prophase
BLCA,BRCA,CESC,HNSC,LIHC,LUAD,LUSC,PAAD,UCEC	hsa.miR.3667	R-HSA-2559583	Cellular Senescence
BLCA,BRCA,CESC,HNSC,LIHC,LUAD,LUSC,PAAD,UCEC	hsa.miR.3667	R-HSA-1474165	Reproduction
BLCA,BRCA,CESC,HNSC,LIHC,LUAD,LUSC,PAAD,UCEC	hsa.miR.3667	R-HSA-73884	Base Excision Repair
BLCA,BRCA,CESC,HNSC,LIHC,LUAD,LUSC,PAAD,UCEC	hsa.miR.3667	R-HSA-3247509	Chromatin modifying enzymes
BLCA,BRCA,CESC,HNSC,LIHC,LUAD,LUSC,PAAD,UCEC	hsa.miR.3667	R-HSA-4839726	Chromatin organization
BLCA,BRCA,CESC,HNSC,LIHC,LUAD,LUSC,PAAD,UCEC	hsa.miR.3667	R-HSA-212165	Epigenetic regulation of gene expression
BLCA,BRCA,CESC,HNSC,LIHC,LUAD,LUSC,PAAD,UCEC	hsa.miR.3667	R-HSA-9018519	Estrogen-dependent gene expression
BLCA,BRCA,CESC,HNSC,LIHC,LUAD,LUSC,PAAD,UCEC	hsa.miR.3667	R-HSA-3214858	RMTs methylate histone arginines
BLCA,BRCA,CESC,HNSC,LIHC,LUAD,LUSC,PAAD,UCEC	hsa.miR.3667	R-HSA-73886	Chromosome Maintenance
BLCA,BRCA,CESC,HNSC,LIHC,LUAD,LUSC,PAAD,UCEC	hsa.miR.3667	R-HSA-8939211	ESR-mediated signaling
BLCA,BRCA,CESC,HNSC,LIHC,LUAD,LUSC,PAAD,UCEC	hsa.miR.3667	R-HSA-201681	TCF dependent signaling in response to WNT
BLCA,BRCA,CESC,HNSC,LIHC,LUAD,LUSC,PAAD,UCEC	hsa.miR.3667	R-HSA-5689880	Ub-specific processing proteases
BLCA,BRCA,CESC,HNSC,LIHC,LUAD,LUSC,PAAD,UCEC	hsa.miR.3667	R-HSA-157118	Signaling by NOTCH
BLCA,BRCA,CESC,HNSC,LIHC,LUAD,LUSC,PAAD,UCEC	hsa.miR.3667	R-HSA-8878171	Transcriptional regulation by RUNX1
BLCA,BRCA,CESC,HNSC,LIHC,LUAD,LUSC,PAAD,UCEC	hsa.miR.3667	R-HSA-5689901	Metalloprotease DUBs
BLCA,BRCA,CESC,HNSC,LIHC,LUAD,LUSC,PAAD,UCEC	hsa.miR.3667	R-HSA-9006931	Signaling by Nuclear Receptors
BLCA,BRCA,CESC,HNSC,LIHC,LUAD,LUSC,PAAD,UCEC	hsa.miR.3667	R-HSA-195258	RHO GTPase Effectors
BLCA,BRCA,CESC,HNSC,LIHC,LUAD,LUSC,PAAD,UCEC	hsa.miR.3667	R-HSA-5688426	Deubiquitination
BLCA,BRCA,CESC,HNSC,LIHC,LUAD,LUSC,PAAD,UCEC	hsa.miR.3667	R-HSA-195721	Signaling by WNT
BLCA,BRCA,CESC,HNSC,LIHC,LUAD,LUSC,PAAD,UCEC	hsa.miR.3667	R-HSA-2262752	Cellular responses to stress
BLCA,BRCA,CESC,HNSC,LIHC,LUAD,LUSC,PAAD,UCEC	hsa.miR.3667	R-HSA-8953897	Cellular responses to external stimuli
BLCA,BRCA,CESC,HNSC,LIHC,LUAD,LUSC,PAAD,UCEC	hsa.miR.3667	R-HSA-68886	M Phase
BLCA,BRCA,CESC,HNSC,LIHC,LUAD,LUSC,PAAD,UCEC	hsa.miR.3667	R-HSA-5693571	Nonhomologous End-Joining (NHEJ)
BLCA,BRCA,CESC,HNSC,LIHC,LUAD,LUSC,PAAD,UCEC	hsa.miR.3667	R-HSA-5693565	Recruitment and ATM-mediated phosphorylation of repair and signaling proteins at DNA double strand breaks
BLCA,BRCA,CESC,HNSC,LIHC,LUAD,LUSC,PAAD,UCEC	hsa.miR.3667	R-HSA-5693606	DNA Double Strand Break Response
BLCA,BRCA,CESC,HNSC,LIHC,LUAD,LUSC,PAAD,UCEC	hsa.miR.3667	R-HSA-194315	Signaling by Rho GTPases
BLCA,BRCA,CESC,HNSC,LIHC,LUAD,LUSC,PAAD,UCEC	hsa.miR.3667	R-HSA-73894	DNA Repair
BLCA,BRCA,CESC,HNSC,LIHC,LUAD,LUSC,PAAD,UCEC	hsa.miR.3667	R-HSA-1266738	Developmental Biology
BLCA,BRCA,CESC,HNSC,LIHC,LUAD,LUSC,PAAD,UCEC	hsa.miR.3667	R-HSA-69473	G2/M DNA damage checkpoint
BLCA,BRCA,CESC,HNSC,LIHC,LUAD,LUSC,PAAD,UCEC	hsa.miR.3667	R-HSA-5693607	Processing of DNA double-strand break ends
BLCA,BRCA,CESC,HNSC,LIHC,LUAD,LUSC,PAAD,UCEC	hsa.miR.3667	R-HSA-69278	Cell Cycle, Mitotic
BLCA,BRCA,CESC,HNSC,LIHC,LUAD,LUSC,PAAD,UCEC	hsa.miR.3667	R-HSA-5689603	UCH proteinases
BLCA,BRCA,CESC,HNSC,LIHC,LUAD,LUSC,PAAD,UCEC	hsa.miR.3667	R-HSA-5693567	HDR through Homologous Recombination (HRR) or Single Strand Annealing (SSA)
BLCA,BRCA,CESC,HNSC,LIHC,LUAD,LUSC,PAAD,UCEC	hsa.miR.3667	R-HSA-1640170	Cell Cycle
BLCA,BRCA,CESC,HNSC,LIHC,LUAD,LUSC,PAAD,UCEC	hsa.miR.3667	R-HSA-5693538	Homology Directed Repair
BLCA,BRCA,CESC,HNSC,LIHC,LUAD,LUSC,PAAD,UCEC	hsa.miR.3667	R-HSA-8866654	E3 ubiquitin ligases ubiquitinate target proteins
BLCA,BRCA,CESC,HNSC,LIHC,LUAD,LUSC,PAAD,UCEC	hsa.miR.3667	R-HSA-5693532	DNA Double-Strand Break Repair
BLCA,BRCA,CESC,HNSC,LIHC,LUAD,LUSC,PAAD,UCEC	hsa.miR.3667	R-HSA-69481	G2/M Checkpoints
BLCA,BRCA,CESC,HNSC,LIHC,LUAD,LUSC,PAAD,UCEC	hsa.miR.3667	R-HSA-8852135	Protein ubiquitination
BLCA,BRCA,KIRC,OV,UCEC	hsa.miR.4728	R-HSA-1640170	Cell Cycle
BLCA,BRCA,KIRC,OV,UCEC	hsa.miR.4728	R-HSA-69278	Cell Cycle, Mitotic
BLCA,BRCA,KIRC,OV,UCEC	hsa.miR.4728	R-HSA-162582	Signal Transduction
BLCA,BRCA,KIRC,OV,UCEC	hsa.miR.4728	R-HSA-69618	Mitotic Spindle Checkpoint
BLCA,BRCA,KIRC,OV,UCEC	hsa.miR.4728	R-HSA-68886	M Phase
BLCA,BRCA,KIRC,OV,UCEC	hsa.miR.4728	R-HSA-141444	Amplification of signal from unattached kinetochores via a MAD2 inhibitory signal
BLCA,BRCA,KIRC,OV,UCEC	hsa.miR.4728	R-HSA-141424	Amplification of signal from the kinetochores
BLCA,BRCA,KIRC,OV,UCEC	hsa.miR.4728	R-HSA-2467813	Separation of Sister Chromatids
BLCA,BRCA,KIRC,OV,UCEC	hsa.miR.4728	R-HSA-69620	Cell Cycle Checkpoints
BLCA,BRCA,KIRC,OV,UCEC	hsa.miR.4728	R-HSA-68882	Mitotic Anaphase
BLCA,BRCA,KIRC,OV,UCEC	hsa.miR.4728	R-HSA-2555396	Mitotic Metaphase and Anaphase
BLCA,BRCA,KIRC,OV,UCEC	hsa.miR.4728	R-HSA-2500257	Resolution of Sister Chromatid Cohesion
BLCA,BRCA,KIRC,OV,UCEC	hsa.miR.4728	R-HSA-5663220	RHO GTPases Activate Formins
BLCA,BRCA,KIRC,OV,UCEC	hsa.miR.4728	R-HSA-195258	RHO GTPase Effectors
BLCA,BRCA,KIRC,OV,UCEC	hsa.miR.4728	R-HSA-68877	Mitotic Prometaphase
BLCA,BRCA,KIRC,OV,UCEC	hsa.miR.4728	R-HSA-212436	Generic Transcription Pathway
BLCA,BRCA,KIRC,OV,UCEC	hsa.miR.4728	R-HSA-194315	Signaling by Rho GTPases
BLCA,BRCA,KIRC,OV,UCEC	hsa.miR.4728	R-HSA-156711	Polo-like kinase mediated events
BLCA,BRCA,KIRC,OV,UCEC	hsa.miR.4728	R-HSA-73857	RNA Polymerase II Transcription
BLCA,BRCA,KIRC,OV,UCEC	hsa.miR.4728	R-HSA-1474244	Extracellular matrix organization
BLCA,BRCA,KIRC,OV,UCEC	hsa.miR.4728	R-HSA-174178	APC/C:Cdh1 mediated degradation of Cdc20 and other APC/C:Cdh1 targeted proteins in late mitosis/early G1
BLCA,BRCA,KIRC,OV,UCEC	hsa.miR.4728	R-HSA-74160	Gene expression (Transcription)
BLCA,BRCA,KIRC,OV,UCEC	hsa.miR.4728	R-HSA-69275	G2/M Transition
BLCA,BRCA,KIRC,OV,UCEC	hsa.miR.4728	R-HSA-453274	Mitotic G2-G2/M phases
BLCA,BRCA,KIRC,OV,UCEC	hsa.miR.4728	R-HSA-174143	APC/C-mediated degradation of cell cycle proteins
BLCA,BRCA,KIRC,OV,UCEC	hsa.miR.4728	R-HSA-453276	Regulation of mitotic cell cycle
BLCA,BRCA,ESCA,HNSC,LUAD,LUSC,PAAD,UCEC	hsa.miR.210	R-HSA-5689901	Metalloprotease DUBs
BLCA,BRCA,ESCA,HNSC,LUAD,LUSC,PAAD,UCEC	hsa.miR.210	R-HSA-3214858	RMTs methylate histone arginines
BLCA,BRCA,ESCA,HNSC,LUAD,LUSC,PAAD,UCEC	hsa.miR.210	R-HSA-3214815	HDACs deacetylate histones
BLCA,BRCA,ESCA,HNSC,LUAD,LUSC,PAAD,UCEC	hsa.miR.210	R-HSA-5689603	UCH proteinases
BRCA,ESCA,HNSC,LGG,OV,UCEC	hsa.miR.339	R-HSA-5619507	Activation of HOX genes during differentiation
BRCA,ESCA,HNSC,LGG,OV,UCEC	hsa.miR.339	R-HSA-5617472	Activation of anterior HOX genes in hindbrain development during early embryogenesis
BRCA,ESCA,HNSC,LGG,OV,UCEC	hsa.miR.339	R-HSA-1266738	Developmental Biology
BRCA	hsa.miR.642a	R-HSA-211859	Biological oxidations
BRCA	hsa.miR.642a	R-HSA-1430728	Metabolism
BRCA	hsa.miR.642a	R-HSA-71384	Ethanol oxidation
BRCA	hsa.miR.642a	R-HSA-211945	Phase I - Functionalization of compounds
BRCA,LUAD	hsa.miR.769	R-HSA-500792	GPCR ligand binding
BRCA,LUAD	hsa.miR.769	R-HSA-71384	Ethanol oxidation
BRCA	hsa.miR.3190	R-HSA-1266738	Developmental Biology
BRCA,LUAD	hsa.miR.320e	R-HSA-211859	Biological oxidations
BRCA,LUAD	hsa.miR.320e	R-HSA-71384	Ethanol oxidation
BRCA,LUAD	hsa.miR.320e	R-HSA-1430728	Metabolism
BRCA,LGG	hsa.miR.1291	R-HSA-1430728	Metabolism
BRCA,LGG	hsa.miR.1291	R-HSA-112316	Neuronal System
BRCA,LGG	hsa.miR.1291	R-HSA-162582	Signal Transduction
BRCA,LGG	hsa.miR.1291	R-HSA-382551	Transport of small molecules
BRCA,CESC,LGG,UCEC	hsa.miR.1224	R-HSA-629597	Highly calcium permeable nicotinic acetylcholine receptors
BRCA,CESC,LGG,UCEC	hsa.miR.1224	R-HSA-629594	Highly calcium permeable postsynaptic nicotinic acetylcholine receptors
BRCA,CESC,LGG,UCEC	hsa.miR.1224	R-HSA-622323	Presynaptic nicotinic acetylcholine receptors
BRCA,ESCA,LUAD,LUSC,PAAD,PRAD	hsa.miR.5687	R-HSA-109582	Hemostasis
BRCA,ESCA,LUAD,LUSC,PAAD,PRAD	hsa.miR.5687	R-HSA-166658	Complement cascade
BRCA,ESCA,LUAD,LUSC,PAAD,PRAD	hsa.miR.5687	R-HSA-210991	Basigin interactions
BRCA,ESCA,LUAD,LUSC,PAAD,PRAD	hsa.miR.5687	R-HSA-166663	Initial triggering of complement
BRCA,ESCA,LUAD,LUSC,PAAD,PRAD	hsa.miR.5687	R-HSA-202733	Cell surface interactions at the vascular wall
BRCA,ESCA,LUAD,LUSC,PAAD,PRAD	hsa.miR.5687	R-HSA-977606	Regulation of Complement cascade
BRCA,ESCA,LUAD,LUSC,PAAD,PRAD	hsa.miR.5687	R-HSA-382551	Transport of small molecules
BRCA,ESCA,LUAD,LUSC,PAAD,PRAD	hsa.miR.5687	R-HSA-397014	Muscle contraction
BRCA,ESCA,LUAD,LUSC,PAAD,PRAD	hsa.miR.5687	R-HSA-445355	Smooth Muscle Contraction
BRCA,ESCA,LUAD,LUSC,PAAD,PRAD,UCEC	hsa.miR.582	R-HSA-112316	Neuronal System
BRCA,ESCA,LUAD,LUSC,PAAD,PRAD,UCEC	hsa.miR.582	R-HSA-1643685	Disease
BRCA,ESCA,LUAD,LUSC,PAAD,PRAD,UCEC	hsa.miR.582	R-HSA-5619115	Disorders of transmembrane transporters
BRCA,ESCA,LUAD,LUSC,PAAD,PRAD,UCEC	hsa.miR.582	R-HSA-1430728	Metabolism
BRCA,ESCA,LUAD,LUSC,PAAD,PRAD,UCEC	hsa.miR.582	R-HSA-162582	Signal Transduction
BRCA,ESCA,LUAD,LUSC,PAAD,PRAD,UCEC	hsa.miR.582	R-HSA-112315	Transmission across Chemical Synapses
BRCA,LUAD,OV,UCEC	hsa.miR.1910	R-HSA-196807	Nicotinate metabolism
BRCA	hsa.miR.4661	R-HSA-6809371	Formation of the cornified envelope
BRCA,HNSC,OV	hsa.miR.4453	R-HSA-5690714	CD22 mediated BCR regulation
BRCA,LUAD,PAAD,UCEC	hsa.miR.4510	R-HSA-173623	Classical antibody-mediated complement activation
BRCA,LUAD,PAAD,UCEC	hsa.miR.4510	R-HSA-2730905	Role of LAT2/NTAL/LAB on calcium mobilization
BRCA,LUAD,PAAD,UCEC	hsa.miR.4510	R-HSA-2168880	Scavenging of heme from plasma
BRCA,LUAD,PAAD,UCEC	hsa.miR.4510	R-HSA-2029481	FCGR activation
BRCA,LUAD,PAAD,UCEC	hsa.miR.4510	R-HSA-166786	Creation of C4 and C2 activators
BRCA,LUAD,PAAD,UCEC	hsa.miR.4510	R-HSA-166663	Initial triggering of complement
BRCA,LUAD,PAAD,UCEC	hsa.miR.4510	R-HSA-2871809	FCERI mediated Ca+2 mobilization
BRCA,LUAD,PAAD,UCEC	hsa.miR.4510	R-HSA-2029485	Role of phospholipids in phagocytosis
BRCA,LUAD,PAAD,UCEC	hsa.miR.4510	R-HSA-2871796	FCERI mediated MAPK activation
BRCA,LUAD,PAAD,UCEC	hsa.miR.4510	R-HSA-2173782	Binding and Uptake of Ligands by Scavenger Receptors
BRCA,LUAD,PAAD,UCEC	hsa.miR.4510	R-HSA-977606	Regulation of Complement cascade
BRCA,LUAD,PAAD,UCEC	hsa.miR.4510	R-HSA-166658	Complement cascade
BRCA,LUAD,PAAD,UCEC	hsa.miR.4510	R-HSA-2029482	Regulation of actin dynamics for phagocytic cup formation
BRCA,LUAD,PAAD,UCEC	hsa.miR.4510	R-HSA-2871837	FCERI mediated NF-kB activation
BRCA,LUAD,PAAD,UCEC	hsa.miR.4510	R-HSA-2029480	Fcgamma receptor (FCGR) dependent phagocytosis
BRCA,LUAD,PAAD,UCEC	hsa.miR.4510	R-HSA-2454202	Fc epsilon receptor (FCERI) signaling
BRCA,LUAD,PAAD,UCEC	hsa.miR.4510	R-HSA-198933	Immunoregulatory interactions between a Lymphoid and a non-Lymphoid cell
BRCA,LUAD,PAAD,UCEC	hsa.miR.4510	R-HSA-168249	Innate Immune System
BRCA,LUAD,PAAD,UCEC	hsa.miR.4510	R-HSA-202733	Cell surface interactions at the vascular wall
BRCA,LUAD,PAAD,UCEC	hsa.miR.4510	R-HSA-5690714	CD22 mediated BCR regulation
BRCA,LUAD,PAAD,UCEC	hsa.miR.4510	R-HSA-983695	Antigen activates B Cell Receptor (BCR) leading to generation of second messengers
BRCA,LUAD,PAAD,UCEC	hsa.miR.4510	R-HSA-983705	Signaling by the B Cell Receptor (BCR)
BRCA,LUAD,PAAD,UCEC	hsa.miR.4510	R-HSA-168256	Immune System
BRCA,UCEC	hsa.miR.6842	R-HSA-140342	Apoptosis induced DNA fragmentation
BRCA,UCEC	hsa.miR.6842	R-HSA-2559584	Formation of Senescence-Associated Heterochromatin Foci (SAHF)
BRCA,UCEC	hsa.miR.6842	R-HSA-75153	Apoptotic execution phase
BRCA,UCEC	hsa.miR.6842	R-HSA-2559586	DNA Damage/Telomere Stress Induced Senescence
CESC,OV,UCEC	hsa.miR.6810	R-HSA-425410	Metal ion SLC transporters
CESC,LUAD	hsa.miR.4665	R-HSA-3214815	HDACs deacetylate histones
CESC,LUAD	hsa.miR.4665	R-HSA-2559586	DNA Damage/Telomere Stress Induced Senescence
CESC	hsa.miR.877	R-HSA-500792	GPCR ligand binding
CESC	hsa.miR.877	R-HSA-8986944	Transcriptional Regulation by MECP2
CESC	hsa.miR.5684	R-HSA-1266738	Developmental Biology
CESC,HNSC,OV,UCEC	hsa.miR.4525	R-HSA-5690714	CD22 mediated BCR regulation
CESC,HNSC,OV,UCEC	hsa.miR.4525	R-HSA-173623	Classical antibody-mediated complement activation
CESC,HNSC,OV,UCEC	hsa.miR.4525	R-HSA-2730905	Role of LAT2/NTAL/LAB on calcium mobilization
CESC,HNSC,OV,UCEC	hsa.miR.4525	R-HSA-2168880	Scavenging of heme from plasma
CESC,HNSC,OV,UCEC	hsa.miR.4525	R-HSA-2029481	FCGR activation
CESC,HNSC,OV,UCEC	hsa.miR.4525	R-HSA-983695	Antigen activates B Cell Receptor (BCR) leading to generation of second messengers
CESC,HNSC,OV,UCEC	hsa.miR.4525	R-HSA-166786	Creation of C4 and C2 activators
CESC,HNSC,OV,UCEC	hsa.miR.4525	R-HSA-166663	Initial triggering of complement
CESC,HNSC,OV,UCEC	hsa.miR.4525	R-HSA-2871809	FCERI mediated Ca+2 mobilization
CESC,HNSC,OV,UCEC	hsa.miR.4525	R-HSA-2029485	Role of phospholipids in phagocytosis
CESC,HNSC,OV,UCEC	hsa.miR.4525	R-HSA-2871796	FCERI mediated MAPK activation
CESC,HNSC,OV,UCEC	hsa.miR.4525	R-HSA-2173782	Binding and Uptake of Ligands by Scavenger Receptors
CESC,HNSC,OV,UCEC	hsa.miR.4525	R-HSA-977606	Regulation of Complement cascade
CESC,HNSC,OV,UCEC	hsa.miR.4525	R-HSA-166658	Complement cascade
CESC,HNSC,OV,UCEC	hsa.miR.4525	R-HSA-2029482	Regulation of actin dynamics for phagocytic cup formation
CESC,HNSC,OV,UCEC	hsa.miR.4525	R-HSA-2871837	FCERI mediated NF-kB activation
CESC,HNSC,OV,UCEC	hsa.miR.4525	R-HSA-2029480	Fcgamma receptor (FCGR) dependent phagocytosis
CESC,HNSC,OV,UCEC	hsa.miR.4525	R-HSA-983705	Signaling by the B Cell Receptor (BCR)
CESC,HNSC,OV,UCEC	hsa.miR.4525	R-HSA-2454202	Fc epsilon receptor (FCERI) signaling
CESC,HNSC,OV,UCEC	hsa.miR.4525	R-HSA-198933	Immunoregulatory interactions between a Lymphoid and a non-Lymphoid cell
CESC,HNSC,OV,UCEC	hsa.miR.4525	R-HSA-6805567	Keratinization
CESC,LUSC	hsa.miR.3174	R-HSA-6805567	Keratinization
CESC,ESCA,HNSC,UCEC	hsa.miR.6513	R-HSA-6805567	Keratinization
CESC,DLBC,LUAD,UCEC	hsa.miR.551a	R-HSA-168256	Immune System
CESC,DLBC,LUAD,UCEC	hsa.miR.551a	R-HSA-168249	Innate Immune System
CESC,DLBC,LUAD,UCEC	hsa.miR.551a	R-HSA-6785807	Interleukin-4 and Interleukin-13 signaling
CESC,DLBC,LUAD,UCEC	hsa.miR.551a	R-HSA-6798695	Neutrophil degranulation
CESC,DLBC,LUAD,UCEC	hsa.miR.551a	R-HSA-5083636	Defective GALNT12 causes colorectal cancer 1 (CRCS1)
CESC,DLBC,LUAD,UCEC	hsa.miR.551a	R-HSA-5083625	Defective GALNT3 causes familial hyperphosphatemic tumoral calcinosis (HFTC)
CESC,DLBC,LUAD,UCEC	hsa.miR.551a	R-HSA-5083632	Defective C1GALT1C1 causes Tn polyagglutination syndrome (TNPS)
CESC,DLBC,LUAD,UCEC	hsa.miR.551a	R-HSA-977068	Termination of O-glycan biosynthesis
CESC,DLBC,ESCA,HNSC,KIRC,LIHC,PRAD,UCEC	hsa.miR.346	R-HSA-382551	Transport of small molecules
CESC,DLBC,ESCA,HNSC,KIRC,LIHC,PRAD,UCEC	hsa.miR.346	R-HSA-445717	Aquaporin-mediated transport
CESC,DLBC,ESCA,HNSC,KIRC,LIHC,PRAD,UCEC	hsa.miR.346	R-HSA-425366	Transport of bile salts and organic acids, metal ions and amine compounds
CESC,DLBC,ESCA,HNSC,KIRC,LIHC,PRAD,UCEC	hsa.miR.346	R-HSA-425407	SLC-mediated transmembrane transport
ESCA	hsa.miR.6501	R-HSA-1839122	Signaling by activated point mutants of FGFR1
ESCA	hsa.miR.6501	R-HSA-190373	FGFR1c ligand binding and activation
ESCA	hsa.miR.6501	R-HSA-190375	FGFR2c ligand binding and activation
ESCA	hsa.miR.6501	R-HSA-190322	FGFR4 ligand binding and activation
ESCA	hsa.miR.6501	R-HSA-5654228	Phospholipase C-mediated cascade; FGFR4
ESCA	hsa.miR.6501	R-HSA-190242	FGFR1 ligand binding and activation
ESCA	hsa.miR.6501	R-HSA-5654219	Phospholipase C-mediated cascade: FGFR1
ESCA	hsa.miR.6501	R-HSA-2033519	Activated point mutants of FGFR2
ESCA	hsa.miR.6501	R-HSA-5654221	Phospholipase C-mediated cascade; FGFR2
ESCA	hsa.miR.6501	R-HSA-190241	FGFR2 ligand binding and activation
ESCA	hsa.miR.6501	R-HSA-5654720	PI-3K cascade:FGFR4
ESCA	hsa.miR.6501	R-HSA-5654719	SHC-mediated cascade:FGFR4
ESCA	hsa.miR.6501	R-HSA-5654689	PI-3K cascade:FGFR1
ESCA	hsa.miR.6501	R-HSA-5654688	SHC-mediated cascade:FGFR1
ESCA	hsa.miR.6501	R-HSA-5654712	FRS-mediated FGFR4 signaling
ESCA	hsa.miR.6501	R-HSA-5654693	FRS-mediated FGFR1 signaling
ESCA	hsa.miR.6501	R-HSA-5654695	PI-3K cascade:FGFR2
ESCA	hsa.miR.6501	R-HSA-5654699	SHC-mediated cascade:FGFR2
ESCA	hsa.miR.6501	R-HSA-5654700	FRS-mediated FGFR2 signaling
ESCA	hsa.miR.6501	R-HSA-5654716	Downstream signaling of activated FGFR4
ESCA	hsa.miR.6501	R-HSA-5654696	Downstream signaling of activated FGFR2
ESCA	hsa.miR.6501	R-HSA-5654687	Downstream signaling of activated FGFR1
ESCA	hsa.miR.6501	R-HSA-1839124	FGFR1 mutant receptor activation
ESCA	hsa.miR.6501	R-HSA-5654733	Negative regulation of FGFR4 signaling
ESCA	hsa.miR.6501	R-HSA-1839126	FGFR2 mutant receptor activation
ESCA	hsa.miR.6501	R-HSA-5654726	Negative regulation of FGFR1 signaling
ESCA	hsa.miR.6501	R-HSA-5654727	Negative regulation of FGFR2 signaling
ESCA	hsa.miR.6501	R-HSA-5655302	Signaling by FGFR1 in disease
ESCA,LUSC,PAAD	hsa.miR.6852	R-HSA-6809371	Formation of the cornified envelope
ESCA,LUSC,PAAD	hsa.miR.6852	R-HSA-6805567	Keratinization
ESCA,LUSC,PAAD	hsa.miR.6852	R-HSA-1266738	Developmental Biology
LAML	hsa.miR.183	R-HSA-202733	Cell surface interactions at the vascular wall
LAML	hsa.miR.6509	R-HSA-3781865	Diseases of glycosylation
LAML	hsa.miR.6509	R-HSA-5083635	Defective B3GALTL causes Peters-plus syndrome (PpS)
LAML	hsa.miR.6509	R-HSA-5173214	O-glycosylation of TSR domain-containing proteins
LAML,LUAD,UCEC	hsa.miR.212	R-HSA-211859	Biological oxidations
LAML,LUAD,UCEC	hsa.miR.212	R-HSA-71384	Ethanol oxidation
LAML	hsa.miR.29b.1	R-HSA-173623	Classical antibody-mediated complement activation
LAML	hsa.miR.29b.1	R-HSA-2029481	FCGR activation
LAML	hsa.miR.29b.1	R-HSA-166786	Creation of C4 and C2 activators
LAML	hsa.miR.29b.1	R-HSA-166663	Initial triggering of complement
LAML	hsa.miR.29b.1	R-HSA-2029485	Role of phospholipids in phagocytosis
LAML	hsa.miR.29b.1	R-HSA-977606	Regulation of Complement cascade
LAML	hsa.miR.29b.1	R-HSA-166658	Complement cascade
LAML	hsa.miR.29b.1	R-HSA-2029482	Regulation of actin dynamics for phagocytic cup formation
LAML	hsa.miR.29b.1	R-HSA-2029480	Fcgamma receptor (FCGR) dependent phagocytosis
LAML	hsa.miR.29b.1	R-HSA-5690714	CD22 mediated BCR regulation
LAML	hsa.miR.29b.1	R-HSA-2730905	Role of LAT2/NTAL/LAB on calcium mobilization
LAML	hsa.miR.29b.1	R-HSA-2168880	Scavenging of heme from plasma
LAML	hsa.miR.29b.1	R-HSA-983695	Antigen activates B Cell Receptor (BCR) leading to generation of second messengers
LAML	hsa.miR.29b.1	R-HSA-2871809	FCERI mediated Ca+2 mobilization
LAML	hsa.miR.29b.1	R-HSA-2871796	FCERI mediated MAPK activation
LAML	hsa.miR.29b.1	R-HSA-2173782	Binding and Uptake of Ligands by Scavenger Receptors
LAML	hsa.miR.29b.1	R-HSA-2871837	FCERI mediated NF-kB activation
LAML	hsa.miR.29b.1	R-HSA-983705	Signaling by the B Cell Receptor (BCR)
LAML	hsa.miR.29b.1	R-HSA-2454202	Fc epsilon receptor (FCERI) signaling
LAML	hsa.miR.29b.1	R-HSA-198933	Immunoregulatory interactions between a Lymphoid and a non-Lymphoid cell
LAML	hsa.miR.29b.1	R-HSA-202733	Cell surface interactions at the vascular wall
LAML	hsa.miR.29b.1	R-HSA-1280218	Adaptive Immune System
LAML	hsa.miR.29b.1	R-HSA-168256	Immune System
LGG,LUAD	hsa.miR.944	R-HSA-6805567	Keratinization
LGG	hsa.miR.4648	R-HSA-202040	G-protein activation
LIHC	hsa.miR.1288	R-HSA-8957275	Post-translational protein phosphorylation
LIHC,PRAD	hsa.miR.1180	R-HSA-909733	Interferon alpha/beta signaling
LIHC,PRAD	hsa.miR.1180	R-HSA-913531	Interferon Signaling
LIHC,PRAD	hsa.miR.1180	R-HSA-1169410	Antiviral mechanism by IFN-stimulated genes
LIHC,PRAD	hsa.miR.1180	R-HSA-8983711	OAS antiviral response
LUSC,OV	hsa.miR.6814	R-HSA-5690714	CD22 mediated BCR regulation
LUSC,OV	hsa.miR.6814	R-HSA-173623	Classical antibody-mediated complement activation
LUSC,OV	hsa.miR.6814	R-HSA-2730905	Role of LAT2/NTAL/LAB on calcium mobilization
LUSC,OV	hsa.miR.6814	R-HSA-2168880	Scavenging of heme from plasma
LUSC,OV	hsa.miR.6814	R-HSA-2029481	FCGR activation
LUSC,OV	hsa.miR.6814	R-HSA-983695	Antigen activates B Cell Receptor (BCR) leading to generation of second messengers
LUSC,OV	hsa.miR.6814	R-HSA-166786	Creation of C4 and C2 activators
LUSC,OV	hsa.miR.6814	R-HSA-166663	Initial triggering of complement
LUSC,OV	hsa.miR.6814	R-HSA-2871809	FCERI mediated Ca+2 mobilization
LUSC,OV	hsa.miR.6814	R-HSA-2029485	Role of phospholipids in phagocytosis
LUSC,OV	hsa.miR.6814	R-HSA-2871796	FCERI mediated MAPK activation
LUSC,OV	hsa.miR.6814	R-HSA-2173782	Binding and Uptake of Ligands by Scavenger Receptors
LUSC,OV	hsa.miR.6814	R-HSA-977606	Regulation of Complement cascade
LUSC,OV	hsa.miR.6814	R-HSA-166658	Complement cascade
LUSC,OV	hsa.miR.6814	R-HSA-2029482	Regulation of actin dynamics for phagocytic cup formation
LUSC,OV	hsa.miR.6814	R-HSA-2871837	FCERI mediated NF-kB activation
LUSC,OV	hsa.miR.6814	R-HSA-2029480	Fcgamma receptor (FCGR) dependent phagocytosis
LUSC,OV	hsa.miR.6814	R-HSA-983705	Signaling by the B Cell Receptor (BCR)
LUSC,OV	hsa.miR.6814	R-HSA-2454202	Fc epsilon receptor (FCERI) signaling
LUSC,OV	hsa.miR.6814	R-HSA-198933	Immunoregulatory interactions between a Lymphoid and a non-Lymphoid cell
LUSC,OV	hsa.miR.6814	R-HSA-202733	Cell surface interactions at the vascular wall
PRAD,THCA	hsa.miR.5706	R-HSA-199991	Membrane Trafficking
PRAD,THCA	hsa.miR.5706	R-HSA-199977	ER to Golgi Anterograde Transport
PRAD,THCA	hsa.miR.5706	R-HSA-5653656	Vesicle-mediated transport
THCA	hsa.miR.605	R-HSA-372790	Signaling by GPCR
THCA	hsa.miR.605	R-HSA-500792	GPCR ligand binding
THCA	hsa.miR.605	R-HSA-373076	Class A/1 (Rhodopsin-like receptors)
THCA	hsa.miR.605	R-HSA-388396	GPCR downstream signalling
THCA	hsa.miR.605	R-HSA-168256	Immune System
THCA	hsa.miR.605	R-HSA-162582	Signal Transduction
UCEC	hsa.miR.607	R-HSA-2559586	DNA Damage/Telomere Stress Induced Senescence
UCEC	hsa.miR.607	R-HSA-140342	Apoptosis induced DNA fragmentation
UCEC	hsa.miR.607	R-HSA-2559583	Cellular Senescence
UCEC	hsa.miR.607	R-HSA-2559584	Formation of Senescence-Associated Heterochromatin Foci (SAHF)
UCEC	hsa.miR.607	R-HSA-5689901	Metalloprotease DUBs
UCEC	hsa.miR.607	R-HSA-3214858	RMTs methylate histone arginines
UCEC	hsa.miR.3158.1	R-HSA-140342	Apoptosis induced DNA fragmentation
UCEC	hsa.miR.3158.1	R-HSA-2559584	Formation of Senescence-Associated Heterochromatin Foci (SAHF)
UCEC	hsa.miR.3158.1	R-HSA-75153	Apoptotic execution phase
UCEC	hsa.miR.3158.1	R-HSA-2559586	DNA Damage/Telomere Stress Induced Senescence
