# Supplementary material for: Computing microRNA-gene interaction networks in pan-cancer using miRDriver
Source: Sci Rep. 2022 Mar 8;12:3717. doi: 10.1038/s41598-022-07628-z (PMC8904490; doi:10.1038/s41598-022-07628-z)
Supplement: Supplementary file 6 — Supplementary Information 6. [file 41598_2022_7628_MOESM6_ESM.xlsx]

## Sheet: Sheet1
Computing microRNA-gene interaction networks in pan-cancer using miRDriver Banabithi Bose, Matthew Moravec, and Serdar Bozdag
Supplemental Table S6
OncoScore citation frequencies for cancer-specific miRNAs.

## Sheet: Sheet2
miRNA	OncoScore	Cancer	miRNA	OncoScore	Cancer
let-7i	8	LUAD	miR-24-2	3	OV
miR-1-2	2	PAAD	miR-27a	31	OV
miR-107	118	UCEC	miR-299	21	BRCA
miR-10a	8	BRCA	miR-29a	560	LAML
miR-1238	4	OV	miR-29b-1	5	LAML
miR-1256	7	UCEC	miR-3127	5	HNSC
miR-125a	42	LUAD	miR-3129	3	HNSC
miR-125b-2	5	BRCA	miR-3144	4	OV
miR-127	42	BRCA	miR-3150a	1	BRCA
miR-1271	32	LIHC	miR-3151	4	LGG
miR-1275	16	LUSC	miR-3154	2	OV
miR-128-1	140	DLBC	miR-3170	1	LIHC
miR-1288	2	LIHC	miR-3173	2	BRCA
miR-129-1	1	LAML	miR-3189	8	UCEC
miR-129-2	4	PRAD	miR-337	8	BRCA
miR-1292	1	LUAD	miR-3605	1	UCEC
miR-1304	7	BRCA	miR-3651	1	LUAD
miR-133a-1	2	PAAD	miR-3654	1	LAML
miR-133b	6	LUSC	miR-3677	4	BLCA
miR-134	56	HNSC	miR-369	12	HNSC
miR-135a-2	1	PRAD	miR-372	61	OV
miR-135b	173	UCEC	miR-378b	1	OV
miR-136	44	CESC	miR-3916	1	DLBC
miR-138-2	1	CESC	miR-3934	1	LUSC
miR-140	134	PRAD	miR-412	1	BRCA
miR-141	34	OV	miR-431	12	BRCA
miR-144	141	BLCA	miR-432	13	BRCA
miR-148b	3	ACC	miR-4461	2	LUAD
miR-15b	13	CESC	miR-451a	13	BLCA
miR-17	33	LIHC	miR-4521	2	PRAD
miR-181a-1	2	LIHC	miR-4697	1	OV
miR-181a-2	3	PRAD	miR-4701	2	LGG
miR-181b-1	353	LIHC	miR-4732	1	BLCA
miR-181c	359	OV	miR-4791	1	BLCA
miR-181d	7	OV	miR-4802	3	LIHC
miR-182	33	LAML	miR-485	45	BRCA
miR-183	26	LAML	miR-487b	1	BRCA
miR-18a	14	LIHC	miR-493	31	BRCA
miR-1913	2	UCEC	miR-494	102	BRCA
miR-192	100	BRCA	miR-495	57	BRCA
miR-194-1	1	KIRC	miR-5003	1	BLCA
miR-194-2	1	BRCA	miR-520a	1	LUAD
miR-195	197	UCEC	miR-522	11	BRCA
miR-1976	3	BLCA	miR-526b	14	BRCA
miR-199b	1	OV	miR-543	23	BRCA
miR-19a	11	LIHC	miR-552	12	UCEC
miR-19b-1	1	LIHC	miR-559	2	LUSC
miR-203a	1	OV	miR-561	6	HNSC
miR-21	107	BRCA	miR-605	15	THCA
miR-211	76	UCEC	miR-607	4	UCEC
miR-2110	1	LIHC	miR-6125	1	LUAD
miR-215	69	KIRC	miR-641	6	LUSC
miR-216a	73	LUSC	miR-642a	1	BRCA
miR-216b	1	LUSC	miR-643	1	LUAD
miR-217	81	LUSC	miR-655	21	HNSC
miR-23a	9	OV	miR-6875	3	PAAD
miR-877	9	CESC	miR-6892	1	LAML
miR-940	31	BLCA	miR-758	10	BRCA
miR-943	3	BLCA	miR-760	20	PRAD
miR-96	21	LAML	miR-874	29	LUAD
miR-99a	116	BRCA
