# Supplementary material for: Computing microRNA-gene interaction networks in pan-cancer using miRDriver
Source: Sci Rep. 2022 Mar 8;12:3717. doi: 10.1038/s41598-022-07628-z (PMC8904490; doi:10.1038/s41598-022-07628-z)
Supplement: Supplementary file 8 — Supplementary Information 8. [file 41598_2022_7628_MOESM8_ESM.xlsx]

## Sheet: Sheet1
Computing microRNA-gene interaction networks in pan-cancer using miRDriver Banabithi Bose, Matthew Moravec, and Serdar Bozdag
Supplemental Table S8
Count of cis genes, trans genes and filtered miRNAs per GISTIC region

## Sheet: UCEC_miRNA.xlsx
Cancer	Gistic Region	Filtered miRNA count
UCEC	Amplification Peak 5	2
UCEC	Amplification Peak 7	10
UCEC	Amplification Peak 11	1
UCEC	Amplification Peak 21	10
UCEC	Amplification Peak 42	9
UCEC	Amplification Peak 46	1
UCEC	Amplification Peak 49	1
UCEC	Amplification Peak 52	1
UCEC	Amplification Peak 53	1
UCEC	Amplification Peak 54	3
UCEC	Amplification Peak 56	2
UCEC	Amplification Peak 69	2
UCEC	Amplification Peak 71	2
UCEC	Amplification Peak 72	3
UCEC	Amplification Peak 76	3
UCEC	Amplification Peak 77	4
UCEC	Amplification Peak 89	2
UCEC	Amplification Peak 93	2
UCEC	Amplification Peak 94	2
UCEC	Deletion Peak 1	20
UCEC	Deletion Peak 8	11
UCEC	Deletion Peak 9	7
UCEC	Deletion Peak 12	2
UCEC	Deletion Peak 17	2
UCEC	Deletion Peak 19	9
UCEC	Deletion Peak 23	2
UCEC	Deletion Peak 24	3
UCEC	Deletion Peak 28	1
UCEC	Deletion Peak 29	2
UCEC	Deletion Peak 30	2
UCEC	Deletion Peak 36	11
UCEC	Deletion Peak 38	1
UCEC	Deletion Peak 39	4
UCEC	Deletion Peak 43	4
UCEC	Deletion Peak 44	3
UCEC	Deletion Peak 46	4
UCEC	Deletion Peak 48	1
UCEC	Deletion Peak 52	8
UCEC	Deletion Peak 54	1
UCEC	Deletion Peak 58	2
UCEC	Deletion Peak 60	5
UCEC	Deletion Peak 61	2
UCEC	Deletion Peak 63	12
UCEC	Deletion Peak 69	23
UCEC	Deletion Peak 73	1
UCEC	Deletion Peak 78	10

## Sheet: PRAD_miRNA.xlsx
Cancer	Gistic Region	Filtered miRNA count
PRAD	Amplification Peak 1	3
PRAD	Amplification Peak 7	1
PRAD	Amplification Peak 14	1
PRAD	Amplification Peak 19	6
PRAD	Amplification Peak 24	3
PRAD	Amplification Peak 27	2
PRAD	Amplification Peak 28	2
PRAD	Amplification Peak 32	2
PRAD	Amplification Peak 39	1
PRAD	Deletion Peak 2	1
PRAD	Deletion Peak 3	1
PRAD	Deletion Peak 5	2
PRAD	Deletion Peak 7	4
PRAD	Deletion Peak 13	1
PRAD	Deletion Peak 14	1
PRAD	Deletion Peak 17	4
PRAD	Deletion Peak 19	4
PRAD	Deletion Peak 22	1
PRAD	Deletion Peak 23	3
PRAD	Deletion Peak 26	10
PRAD	Deletion Peak 27	1
PRAD	Deletion Peak 30	8
PRAD	Deletion Peak 34	1
PRAD	Deletion Peak 35	3
PRAD	Deletion Peak 38	4
PRAD	Deletion Peak 44	2
PRAD	Deletion Peak 46	4
PRAD	Deletion Peak 47	3

## Sheet: PAAD_miRNA.xlsx
Cancer	Gistic Region	Filtered miRNA count
PAAD	Amplification Peak 1	2
PAAD	Amplification Peak 2	1
PAAD	Amplification Peak 10	2
PAAD	Amplification Peak 11	5
PAAD	Amplification Peak 16	6
PAAD	Amplification Peak 21	1
PAAD	Amplification Peak 25	1
PAAD	Amplification Peak 27	1
PAAD	Amplification Peak 30	4
PAAD	Deletion Peak 1	12
PAAD	Deletion Peak 3	1
PAAD	Deletion Peak 4	6
PAAD	Deletion Peak 6	1
PAAD	Deletion Peak 12	5
PAAD	Deletion Peak 17	1
PAAD	Deletion Peak 20	4
PAAD	Deletion Peak 26	2
PAAD	Deletion Peak 28	1
PAAD	Deletion Peak 29	4
PAAD	Deletion Peak 32	1
PAAD	Deletion Peak 33	3
PAAD	Deletion Peak 37	2
PAAD	Deletion Peak 38	8

## Sheet: OV_miRNA.xlsx
Cancer	Gistic Region	Filtered miRNA count
OV	Amplification Peak 2	10
OV	Amplification Peak 3	7
OV	Amplification Peak 5	4
OV	Amplification Peak 6	9
OV	Amplification Peak 7	2
OV	Amplification Peak 9	1
OV	Amplification Peak 10	2
OV	Amplification Peak 11	8
OV	Amplification Peak 13	2
OV	Amplification Peak 14	12
OV	Amplification Peak 15	1
OV	Amplification Peak 18	6
OV	Amplification Peak 19	2
OV	Amplification Peak 21	1
OV	Amplification Peak 22	1
OV	Amplification Peak 23	3
OV	Amplification Peak 24	2
OV	Amplification Peak 25	7
OV	Amplification Peak 29	40
OV	Amplification Peak 32	1
OV	Amplification Peak 33	7
OV	Amplification Peak 34	1
OV	Deletion Peak 1	26
OV	Deletion Peak 5	10
OV	Deletion Peak 6	2
OV	Deletion Peak 7	11
OV	Deletion Peak 9	2
OV	Deletion Peak 10	1
OV	Deletion Peak 11	8
OV	Deletion Peak 14	1
OV	Deletion Peak 15	6
OV	Deletion Peak 16	4
OV	Deletion Peak 17	11
OV	Deletion Peak 20	5
OV	Deletion Peak 22	13
OV	Deletion Peak 24	5
OV	Deletion Peak 25	1
OV	Deletion Peak 27	5
OV	Deletion Peak 28	5
OV	Deletion Peak 31	1
OV	Deletion Peak 32	7
OV	Deletion Peak 34	2
OV	Deletion Peak 35	1
OV	Deletion Peak 36	7
OV	Deletion Peak 38	25
OV	Deletion Peak 41	2
OV	Deletion Peak 42	2
OV	Deletion Peak 43	8

## Sheet: LUSC_miRNA.xlsx
Cancer	Gistic Region	Filtered miRNA count
LUSC	Amplification Peak 5	7
LUSC	Amplification Peak 9	5
LUSC	Amplification Peak 12	12
LUSC	Amplification Peak 19	1
LUSC	Amplification Peak 22	2
LUSC	Amplification Peak 24	1
LUSC	Amplification Peak 26	2
LUSC	Amplification Peak 30	9
LUSC	Amplification Peak 36	9
LUSC	Amplification Peak 39	5
LUSC	Amplification Peak 42	2
LUSC	Amplification Peak 45	1
LUSC	Amplification Peak 48	5
LUSC	Amplification Peak 50	1
LUSC	Amplification Peak 51	6
LUSC	Amplification Peak 56	1
LUSC	Amplification Peak 59	3
LUSC	Deletion Peak 1	16
LUSC	Deletion Peak 4	15
LUSC	Deletion Peak 8	14
LUSC	Deletion Peak 13	4
LUSC	Deletion Peak 19	5
LUSC	Deletion Peak 22	7
LUSC	Deletion Peak 26	4
LUSC	Deletion Peak 27	2
LUSC	Deletion Peak 30	2
LUSC	Deletion Peak 31	6
LUSC	Deletion Peak 32	3
LUSC	Deletion Peak 36	7
LUSC	Deletion Peak 39	1
LUSC	Deletion Peak 42	4
LUSC	Deletion Peak 44	5
LUSC	Deletion Peak 46	4
LUSC	Deletion Peak 53	5
LUSC	Deletion Peak 55	6
LUSC	Deletion Peak 62	8
LUSC	Deletion Peak 64	31
LUSC	Deletion Peak 67	2
LUSC	Deletion Peak 69	1
LUSC	Deletion Peak 70	6
LUSC	Deletion Peak 71	7

## Sheet: LUAD_miRNA.xlsx
Cancer	Gistic Region	Filtered miRNA count
LUAD	Amplification Peak 1	2
LUAD	Amplification Peak 8	1
LUAD	Amplification Peak 10	2
LUAD	Amplification Peak 14	10
LUAD	Amplification Peak 16	1
LUAD	Amplification Peak 23	2
LUAD	Amplification Peak 27	1
LUAD	Amplification Peak 29	11
LUAD	Amplification Peak 35	5
LUAD	Amplification Peak 36	4
LUAD	Amplification Peak 42	3
LUAD	Amplification Peak 43	4
LUAD	Amplification Peak 44	1
LUAD	Amplification Peak 48	1
LUAD	Amplification Peak 49	1
LUAD	Amplification Peak 51	10
LUAD	Amplification Peak 52	1
LUAD	Amplification Peak 58	1
LUAD	Amplification Peak 61	8
LUAD	Amplification Peak 63	5
LUAD	Deletion Peak 1	15
LUAD	Deletion Peak 2	14
LUAD	Deletion Peak 4	5
LUAD	Deletion Peak 7	1
LUAD	Deletion Peak 8	6
LUAD	Deletion Peak 9	1
LUAD	Deletion Peak 11	3
LUAD	Deletion Peak 14	2
LUAD	Deletion Peak 16	2
LUAD	Deletion Peak 19	1
LUAD	Deletion Peak 21	9
LUAD	Deletion Peak 26	2
LUAD	Deletion Peak 28	5
LUAD	Deletion Peak 30	1
LUAD	Deletion Peak 32	2
LUAD	Deletion Peak 34	1
LUAD	Deletion Peak 37	2
LUAD	Deletion Peak 38	5
LUAD	Deletion Peak 40	8
LUAD	Deletion Peak 45	1
LUAD	Deletion Peak 46	5
LUAD	Deletion Peak 50	52
LUAD	Deletion Peak 51	5
LUAD	Deletion Peak 54	2
LUAD	Deletion Peak 56	4
LUAD	Deletion Peak 58	1
LUAD	Deletion Peak 60	5
LUAD	Deletion Peak 62	23
LUAD	Deletion Peak 63	1
LUAD	Deletion Peak 65	2
LUAD	Deletion Peak 68	7

## Sheet: LIHC_miRNA.xlsx
Cancer	Gistic Region	Filtered miRNA count
LIHC	Amplification Peak 2	13
LIHC	Amplification Peak 5	3
LIHC	Amplification Peak 7	2
LIHC	Amplification Peak 14	1
LIHC	Amplification Peak 15	1
LIHC	Amplification Peak 17	4
LIHC	Amplification Peak 18	4
LIHC	Amplification Peak 21	2
LIHC	Amplification Peak 26	1
LIHC	Amplification Peak 27	11
LIHC	Amplification Peak 34	4
LIHC	Amplification Peak 38	8
LIHC	Amplification Peak 43	1
LIHC	Amplification Peak 47	12
LIHC	Amplification Peak 55	1
LIHC	Deletion Peak 1	21
LIHC	Deletion Peak 6	5
LIHC	Deletion Peak 7	3
LIHC	Deletion Peak 10	5
LIHC	Deletion Peak 12	1
LIHC	Deletion Peak 14	1
LIHC	Deletion Peak 16	5
LIHC	Deletion Peak 20	1
LIHC	Deletion Peak 23	1
LIHC	Deletion Peak 24	9
LIHC	Deletion Peak 27	7
LIHC	Deletion Peak 29	6
LIHC	Deletion Peak 36	2
LIHC	Deletion Peak 39	1
LIHC	Deletion Peak 43	3
LIHC	Deletion Peak 44	1
LIHC	Deletion Peak 46	5
LIHC	Deletion Peak 50	1
LIHC	Deletion Peak 51	6

## Sheet: LGG_miRNA.xlsx
Cancer	Gistic Region	Filtered miRNA count
LGG	Amplification Peak 2	2
LGG	Amplification Peak 12	1
LGG	Amplification Peak 13	1
LGG	Amplification Peak 19	8
LGG	Amplification Peak 20	9
LGG	Amplification Peak 25	1
LGG	Amplification Peak 27	4
LGG	Amplification Peak 28	2
LGG	Amplification Peak 31	3
LGG	Amplification Peak 37	2
LGG	Amplification Peak 39	2
LGG	Deletion Peak 1	8
LGG	Deletion Peak 3	1
LGG	Deletion Peak 6	5
LGG	Deletion Peak 8	10
LGG	Deletion Peak 11	4
LGG	Deletion Peak 13	3
LGG	Deletion Peak 15	14
LGG	Deletion Peak 16	2
LGG	Deletion Peak 18	2
LGG	Deletion Peak 20	2
LGG	Deletion Peak 22	5
LGG	Deletion Peak 25	10
LGG	Deletion Peak 26	5
LGG	Deletion Peak 32	3
LGG	Deletion Peak 34	1
LGG	Deletion Peak 35	4
LGG	Deletion Peak 37	4
LGG	Deletion Peak 38	1
LGG	Deletion Peak 45	26
LGG	Deletion Peak 47	7

## Sheet: LAML_miRNA.xlsx
Cancer	Gistic Region	Filtered miRNA count
LAML	Deletion Peak 3	2
LAML	Deletion Peak 15	12
LAML	Deletion Peak 31	3
LAML	Deletion Peak 33	4

[truncated: 23 more sheets: KIRC_miRNA.xlsx, HNSC_miRNA.xlsx, ESCA_miRNA.xlsx, DLBC_miRNA.xlsx, CESC_miRNA.xlsx, BRCA_miRNA.xlsx, BLCA_miRNA.xlsx, ACC_miRNA.xlsx, UCEC_CisTrans.xlsx, PRAD_CisTrans.xlsx, PAAD_CisTrans.xlsx, LUSC_CisTrans.xlsx, LUAD_CisTrans.xlsx, LIHC_CisTrans.xlsx, LGG_CisTrans.xlsx, LAML_CisTrans.xlsx, KIRC_CisTrans.xlsx, HNSC_CisTrans.xlsx, ESCA_CisTrans.xlsx, DLBC_CisTrans.xlsx …]
