# Supplementary material for: Computing microRNA-gene interaction networks in pan-cancer using miRDriver
Source: Sci Rep. 2022 Mar 8;12:3717. doi: 10.1038/s41598-022-07628-z (PMC8904490; doi:10.1038/s41598-022-07628-z)
Supplement: Supplementary file 9 — Supplementary Information 9. [file 41598_2022_7628_MOESM9_ESM.xlsx]

## Sheet: Sheet1
Computing microRNA-gene interaction networks in pan-cancer using miRDriver Banabithi Bose, Matthew Moravec, and Serdar Bozdag
Supplemental Table S9
miRDriver computed gene-mirna interactions in eighteen different cancer types

## Sheet: Gene-miRNA Interactions
Cancer Type	Gene	miRNA	Relationship
ACC	ACP5	hsa.mir.1538	+
ACC	ADSSL1	hsa.mir.153.2	+
ACC	AGRP	hsa.mir.153.2	+
ACC	ALOX12P2	hsa.mir.6781	+
ACC	APCDD1L	hsa.mir.6808	-
ACC	AQP8	hsa.mir.3199.2	-
ACC	ARHGEF2	hsa.mir.1538	+
ACC	ASPDH	hsa.mir.153.2	-
ACC	ATF3	hsa.mir.153.2	-
ACC	BSN-DT	hsa.mir.149	-
ACC	BTNL8	hsa.mir.3199.2	+
ACC	C10orf90	hsa.mir.4786	+
ACC	C11orf86	hsa.mir.3913.1	-
ACC	C11orf86	hsa.mir.6502	+
ACC	C11orf86	hsa.mir.6880	+
ACC	C1QB	hsa.mir.1538	+
ACC	C1QTNF12	hsa.mir.1538	+
ACC	C1QTNF2	hsa.mir.1538	+
ACC	C2	hsa.mir.1538	+
ACC	C2CD4C	hsa.mir.6784	-
ACC	C6orf223	hsa.mir.6758	+
ACC	CA12	hsa.mir.1228	+
ACC	CA12	hsa.mir.3198.2	-
ACC	CA12	hsa.mir.616	+
ACC	CA12	hsa.mir.6880	-
ACC	CAPG	hsa.mir.1538	+
ACC	CARD16	hsa.mir.3199.2	+
ACC	CARNS1	hsa.mir.6781	-
ACC	CARNS1	hsa.mir.6784	-
ACC	CASC15	hsa.mir.26a.2	+
ACC	CASC15	hsa.mir.6502	+
ACC	CCDC184	hsa.mir.149	-
ACC	CCDC184	hsa.mir.4786	-
ACC	CCDC200	hsa.mir.1538	+
ACC	CCL4L2	hsa.mir.4632	+
ACC	CD209	hsa.mir.1538	+
ACC	CD300LB	hsa.mir.1538	+
ACC	CD72	hsa.mir.1538	+
ACC	CD80	hsa.mir.1538	+
ACC	CD83	hsa.mir.3913.1	-
ACC	CDCA7	hsa.mir.6723	+
ACC	CDCA7	hsa.mir.6758	+
ACC	CDH17	hsa.mir.1538	+
ACC	CDH7	hsa.mir.3198.2	+
ACC	CGREF1	hsa.mir.580	-
ACC	CHST2	hsa.mir.34a	+
ACC	CKAP2L	hsa.mir.3198.2	+
ACC	CKM	hsa.mir.148b	+
ACC	CLCF1	hsa.mir.1538	+
ACC	CLCN3P1	hsa.mir.149	+
ACC	CLCN3P1	hsa.mir.4786	+
ACC	COL1A1	hsa.mir.1538	+
ACC	COL5A3	hsa.mir.4786	+
ACC	COL6A2	hsa.mir.1538	+
ACC	CPN2	hsa.mir.6758	+
ACC	CR1	hsa.mir.1538	+
ACC	CTSW	hsa.mir.616	-
ACC	CWH43	hsa.mir.4786	+
ACC	CXCL10	hsa.mir.1228	+
ACC	CYBRD1	hsa.mir.153.2	-
ACC	CYP26B1	hsa.mir.6880	-
ACC	DCSTAMP	hsa.mir.6781	+
ACC	DCX	hsa.mir.1228	+
ACC	DCX	hsa.mir.6880	+
ACC	DDAH2	hsa.mir.1538	+
ACC	DGCR5	hsa.mir.153.2	+
ACC	DLGAP2	hsa.mir.4786	+
ACC	DNAJC22	hsa.mir.200b	+
ACC	DOK2	hsa.mir.1538	+
ACC	DPYSL5	hsa.mir.149	+
ACC	DZIP1L	hsa.mir.1538	+
ACC	ELOVL3	hsa.mir.149	-
ACC	ELOVL3	hsa.mir.6502	+
ACC	EMILIN2	hsa.mir.1538	+
ACC	EMILIN2	hsa.mir.6502	+
ACC	EN1	hsa.mir.3199.2	-
ACC	EN2	hsa.mir.6880	+
ACC	ENTPD8	hsa.mir.149	+
ACC	EPHA6	hsa.mir.4786	+
ACC	ERFE	hsa.mir.1228	+
ACC	ERFE	hsa.mir.4786	+
ACC	ERMN	hsa.mir.1538	+
ACC	ESRP1	hsa.mir.149	+
ACC	EYA2	hsa.mir.1538	+
ACC	FAM102B	hsa.mir.3198.2	+
ACC	FAM237A	hsa.mir.1538	-
ACC	FAM71F2	hsa.mir.153.2	+
ACC	FAM72B	hsa.mir.4786	+
ACC	FERMT1	hsa.mir.1538	-
ACC	FGF13	hsa.mir.616	+
ACC	FMNL1	hsa.mir.1538	+
ACC	FMO1	hsa.mir.1538	+
ACC	FN1	hsa.mir.1228	+
ACC	FN1	hsa.mir.26a.2	-
ACC	FN1	hsa.mir.616	+
ACC	FOLR3	hsa.mir.4786	+
ACC	FOXO6	hsa.mir.149	+
ACC	FPR2	hsa.mir.26a.2	+
ACC	FPR2	hsa.mir.616	+
ACC	FRMD1	hsa.mir.4786	+
ACC	FSD1	hsa.mir.6758	+
ACC	GAPLINC	hsa.mir.1228	+
ACC	GAPLINC	hsa.mir.1538	+
ACC	GAPLINC	hsa.mir.26a.2	+
ACC	GAPLINC	hsa.mir.3913.1	+
ACC	GAS7	hsa.mir.1538	+
ACC	GBP5	hsa.mir.1538	+
ACC	GBX2	hsa.mir.1538	+
ACC	GFI1	hsa.mir.1538	+
ACC	GJA3	hsa.mir.1228	+
ACC	GJA3	hsa.mir.616	+
ACC	GJC2	hsa.mir.1538	+
ACC	GLIS3	hsa.mir.1538	-
ACC	GLIS3	hsa.mir.3199.2	+
ACC	GNA15	hsa.mir.1538	+
ACC	GNB4	hsa.mir.1538	+
ACC	GPAM	hsa.mir.1538	-
ACC	GPR35	hsa.mir.1228	+
ACC	GPR35	hsa.mir.148b	-
ACC	GPR35	hsa.mir.6502	+
ACC	GPR84	hsa.mir.3199.2	+
ACC	HIST1H1E	hsa.mir.4786	+
ACC	HK3	hsa.mir.1538	+
ACC	HLA-DQA1	hsa.mir.153.2	-
ACC	HPSE	hsa.mir.6502	+
ACC	HSPB1P2	hsa.mir.149	+
ACC	HTR1B	hsa.mir.34b	+
ACC	IGF2BP2	hsa.mir.6758	+
ACC	IGF2BP3	hsa.mir.26a.2	+
ACC	IGFBP4	hsa.mir.1538	+
ACC	IGFL1P1	hsa.mir.5010	+
ACC	IGFL2-AS1	hsa.mir.5010	+
ACC	IGHV3-64	hsa.mir.6502	+
ACC	IL10	hsa.mir.1538	+
ACC	IL20RB	hsa.mir.1228	+
ACC	IL24	hsa.mir.3199.2	+
ACC	IL31RA	hsa.mir.1228	+
ACC	IL32	hsa.mir.1538	+
ACC	IQCN	hsa.mir.153.2	+
ACC	IQUB	hsa.mir.5010	+
ACC	IRF7	hsa.mir.1538	+
ACC	JPH3	hsa.mir.4786	+
ACC	KCNB1	hsa.mir.3199.2	-
ACC	KCNJ15	hsa.mir.3199.2	+
ACC	KCNK12	hsa.mir.4786	+
ACC	KIFC1	hsa.mir.3198.2	+
ACC	KLF5	hsa.mir.4786	-
ACC	KLF5	hsa.mir.6880	-
ACC	KLHDC7B	hsa.mir.616	+
ACC	KRTAP5-9	hsa.mir.6784	+
ACC	LAG3	hsa.mir.3199.2	+
ACC	LAMA3	hsa.mir.3199.2	-
ACC	LGALS7B	hsa.mir.6502	+
ACC	LINC00336	hsa.mir.4632	+
ACC	LINC00337	hsa.mir.149	+
ACC	LINC00612	hsa.mir.153.2	+
ACC	LINC01489	hsa.mir.3199.2	+
ACC	LINC01711	hsa.mir.1228	+
ACC	LINC01711	hsa.mir.3198.2	-
ACC	LINC01790	hsa.mir.34b	+
ACC	LINC02284	hsa.mir.34b	-
ACC	LINC02485	hsa.mir.3198.2	-
ACC	LINC02485	hsa.mir.616	+
ACC	LINC02485	hsa.mir.6758	-
ACC	LINC02633	hsa.mir.153.2	+
ACC	LINC02829	hsa.mir.6784	-
ACC	LRRC25	hsa.mir.5010	+
ACC	LRRC37A7P	hsa.mir.1538	-
ACC	LY6K	hsa.mir.34a	+
ACC	LYPD8	hsa.mir.616	+
ACC	LYVE1	hsa.mir.3199.2	+
ACC	MAGED1	hsa.mir.26a.2	-
ACC	MAGED1	hsa.mir.616	-
ACC	MAGED1	hsa.mir.6502	-
ACC	MAGED1	hsa.mir.6758	-
ACC	MAP4K4	hsa.mir.1538	+
ACC	MARVELD1	hsa.mir.429	+
ACC	MBL1P	hsa.mir.153.2	-
ACC	MEIS3	hsa.mir.149	+
ACC	METRNL	hsa.mir.1538	+
ACC	MGAT3	hsa.mir.616	-
ACC	MICAL1	hsa.mir.1538	+
ACC	MICB	hsa.mir.6502	-
ACC	MMP7	hsa.mir.6758	-
ACC	MTATP6P25	hsa.mir.5010	+
ACC	MTCO1P17	hsa.mir.1306	-
ACC	MTCO1P17	hsa.mir.149	+
ACC	MTCO1P17	hsa.mir.185	-
ACC	MTCO1P17	hsa.mir.6723	-
ACC	MTCO1P17	hsa.mir.6784	-
ACC	MTCYBP35	hsa.mir.34a	+
ACC	MTND2P28	hsa.mir.4786	+
ACC	NCF1B	hsa.mir.153.2	-
ACC	NFAM1	hsa.mir.1538	+
ACC	NKAIN1	hsa.mir.1538	-
ACC	NKAIN1	hsa.mir.580	+
ACC	NKAIN1	hsa.mir.6880	-
ACC	NOS1AP	hsa.mir.4786	-
ACC	NOS1AP	hsa.mir.616	+
ACC	NRN1	hsa.mir.149	+
ACC	NYAP2	hsa.mir.4786	+
ACC	P2RY6	hsa.mir.1538	+
ACC	PCDHA12	hsa.mir.616	+
ACC	PCDHGC3	hsa.mir.6880	+
ACC	PCLO	hsa.mir.5010	+
ACC	PDE10A	hsa.mir.616	+
ACC	PDLIM4	hsa.mir.34c	-
ACC	PDX1	hsa.mir.3199.2	-
ACC	PDZRN3	hsa.mir.185	-
ACC	PEAK3	hsa.mir.6880	-
ACC	PERP	hsa.mir.6502	+
ACC	PERP	hsa.mir.6758	+
ACC	PHETA2	hsa.mir.1538	+
ACC	PLA2G4E	hsa.mir.34b	+
ACC	PLA2G7	hsa.mir.1538	+
ACC	PLEKHO2	hsa.mir.153.2	-
ACC	POPDC3	hsa.mir.1228	+
ACC	POSTN	hsa.mir.1228	+
ACC	PPIAP31	hsa.mir.153.2	+
ACC	PPP1R14D	hsa.mir.3199.2	+
ACC	PPP1R14D	hsa.mir.6726	+
ACC	PPP1R27	hsa.mir.200b	+
ACC	PRSS27	hsa.mir.4786	+
ACC	PRSS8	hsa.mir.6880	+
ACC	PTGES	hsa.mir.1228	+
ACC	PTK6	hsa.mir.616	+
ACC	PTK6	hsa.mir.6880	-
ACC	RAB3B	hsa.mir.4786	+
ACC	RAB42	hsa.mir.6502	+
ACC	RAB42	hsa.mir.6758	+
ACC	RCVRN	hsa.mir.1538	+
ACC	RHBDL2	hsa.mir.6880	-
ACC	RHOXF1	hsa.mir.3199.2	-
ACC	RNF133	hsa.mir.153.2	+
ACC	RNF144B	hsa.mir.1538	+
ACC	RNF148	hsa.mir.153.2	+
ACC	RNU1-70P	hsa.mir.3199.2	-
ACC	ROPN1B	hsa.mir.153.2	+
ACC	RPL17P50	hsa.mir.153.2	-
ACC	RPSAP52	hsa.mir.6783	+
ACC	RS1	hsa.mir.1228	-
ACC	RS1	hsa.mir.26a.2	-
ACC	RS1	hsa.mir.616	-
ACC	RS1	hsa.mir.6758	+
ACC	S1PR5	hsa.mir.1538	+
ACC	SATB1-AS1	hsa.mir.34a	+
ACC	SCARNA7	hsa.mir.149	+
ACC	SCARNA9	hsa.mir.5010	+
ACC	SDK1	hsa.mir.153.2	+
ACC	SGK2	hsa.mir.3199.2	-
ACC	SH2D2A	hsa.mir.1538	+
ACC	SIGLEC1	hsa.mir.1538	+
ACC	SIRPG	hsa.mir.3199.2	+
ACC	SLA	hsa.mir.1538	+
ACC	SLAMF8	hsa.mir.1538	+
ACC	SLC17A9	hsa.mir.616	+
ACC	SLC2A3	hsa.mir.153.2	-
ACC	SLC36A2	hsa.mir.148b	+
ACC	SLC44A4	hsa.mir.148b	-
ACC	SLC44A4	hsa.mir.3198.2	-
ACC	SLC44A4	hsa.mir.6758	+
ACC	SLC4A1	hsa.mir.6880	-
ACC	SLC6A9	hsa.mir.153.2	+
ACC	SLC7A11	hsa.mir.616	+
ACC	SLFNL1	hsa.mir.1305	-
ACC	SMCO3	hsa.mir.6502	+
ACC	SNORD104	hsa.mir.1538	+
ACC	SOAT2	hsa.mir.1538	+
ACC	SOCS3	hsa.mir.153.2	-
ACC	SP140	hsa.mir.1538	+
ACC	SPNS3	hsa.mir.1538	-
ACC	SPRR2D	hsa.mir.148b	-
ACC	SPRR2D	hsa.mir.1538	+
ACC	SPRR2D	hsa.mir.26a.2	+
ACC	SPRR2D	hsa.mir.616	+
ACC	SPRR2D	hsa.mir.6502	+
ACC	STAB1	hsa.mir.6880	-
ACC	STAT4	hsa.mir.153.2	-
ACC	STEAP1	hsa.mir.34a	+
ACC	SYBU	hsa.mir.1305	-
ACC	TBXA2R	hsa.mir.6880	+
ACC	THEM5	hsa.mir.1538	+
ACC	THEM5	hsa.mir.200a	+
ACC	THEMIS2	hsa.mir.1538	+
ACC	TLL1	hsa.mir.6880	+
ACC	TM6SF2	hsa.mir.1538	+
ACC	TMEM106A	hsa.mir.1538	+
ACC	TMEM71	hsa.mir.1538	+
ACC	TMEM74	hsa.mir.26a.2	-
ACC	TMPPE	hsa.mir.616	+
ACC	TMPRSS6	hsa.mir.153.2	+
ACC	TNNI3	hsa.mir.3199.2	-
ACC	TP53I3	hsa.mir.1538	+
ACC	TREH	hsa.mir.4786	-
ACC	TSKU	hsa.mir.200b	+
ACC	TTC22	hsa.mir.6880	-
ACC	UBE2SP1	hsa.mir.1538	+
ACC	UCP2	hsa.mir.6880	-
ACC	USP32P1	hsa.mir.26a.2	-
ACC	USP32P1	hsa.mir.6758	-
ACC	VAMP5	hsa.mir.153.2	-
ACC	VMO1	hsa.mir.1538	+
ACC	XKRX	hsa.mir.6880	+
ACC	ZCCHC12	hsa.mir.616	-
ACC	ZDHHC11B	hsa.mir.1538	-
ACC	ZDHHC11B	hsa.mir.6782	-
ACC	ZDHHC11B	hsa.mir.6783	-
ACC	ZNF663P	hsa.mir.149	+
BLCA	AADACP1	hsa.mir.3680.2	+
BLCA	ABCA4	hsa.mir.6803	-
BLCA	ABCC2	hsa.mir.3662	+
BLCA	ABCG8	hsa.mir.16.1	+
BLCA	ACOD1	hsa.mir.3662	+
BLCA	ACOT12	hsa.mir.3613	+
BLCA	ACTG2	hsa.mir.1976	-
BLCA	ADRA1D	hsa.mir.16.1	-
BLCA	ADRA1D	hsa.mir.3613	+
BLCA	ADRB3	hsa.mir.185	-
BLCA	ADRB3	hsa.mir.5571	-
BLCA	AKR1B10	hsa.mir.6502	+
BLCA	ANKRD62P1-PARP4P3	hsa.mir.33a	+
BLCA	ANKRD7	hsa.mir.3662	+
BLCA	ANTXRLP1	hsa.mir.627	+
BLCA	APCDD1L-DT	hsa.let.7a.2	+
BLCA	APCDD1L-DT	hsa.mir.100	+
BLCA	APCDD1L-DT	hsa.mir.4491	-
BLCA	APLN	hsa.mir.3662	+
BLCA	APOBEC4	hsa.mir.144	+
BLCA	AQP4-AS1	hsa.mir.3176	-
BLCA	ARSF	hsa.mir.876	+
BLCA	ASTL	hsa.mir.3653	+
BLCA	ASXL3	hsa.mir.31	-
BLCA	ASXL3	hsa.mir.873	+
BLCA	ASXL3	hsa.mir.876	+
BLCA	ATP6V0CP2	hsa.mir.6503	+
BLCA	BHMT2	hsa.mir.708	-
BLCA	BNC1	hsa.mir.139	-
BLCA	BNC1	hsa.mir.548k	-
BLCA	BNIP3P24	hsa.mir.4724	+
BLCA	BPIFB4	hsa.mir.423	-
BLCA	BTBD9-AS1	hsa.mir.486	+
BLCA	BTNL3	hsa.mir.1227	+
BLCA	BTNL3	hsa.mir.1229	+
BLCA	BTNL3	hsa.mir.4745	+
BLCA	BTNL3	hsa.mir.6885	+
BLCA	C10orf82	hsa.mir.153.2	+
BLCA	C12orf77	hsa.mir.3150b	+
BLCA	C1QBPP2	hsa.mir.378i	+
BLCA	C1QBPP2	hsa.mir.449a	+
BLCA	C1QBPP2	hsa.mir.4791	+
BLCA	C1QTNF9	hsa.mir.5683	+
BLCA	C2orf69P1	hsa.mir.5703	+
BLCA	C2orf69P1	hsa.mir.6510	+
BLCA	C2orf69P1	hsa.mir.7.3	+
BLCA	C4orf17	hsa.mir.15a	-
BLCA	C4orf17	hsa.mir.3613	-
BLCA	C8orf34-AS1	hsa.let.7a.3	+
BLCA	C8orf34-AS1	hsa.mir.3653	+
BLCA	C8orf34-AS1	hsa.mir.4647	-
BLCA	C8orf34-AS1	hsa.mir.943	-
BLCA	C9orf131	hsa.mir.144	+
BLCA	C9orf147	hsa.mir.144	+
BLCA	CA2	hsa.mir.3680.2	+
BLCA	CA4	hsa.mir.16.1	+
BLCA	CA7	hsa.mir.4662a	+
BLCA	CA7	hsa.mir.876	+
BLCA	CADM2-AS1	hsa.mir.3176	-
BLCA	CADPS	hsa.mir.153.2	+
BLCA	CADPS	hsa.mir.885	+
BLCA	CALML3-AS1	hsa.mir.1247	-
BLCA	CAMKV	hsa.mir.885	+
BLCA	CAPZA3	hsa.mir.144	+
BLCA	CCBE1	hsa.mir.301b	-
BLCA	CCDC144A	hsa.mir.4732	+
BLCA	CCDC162P	hsa.mir.144	+
BLCA	CCDC162P	hsa.mir.4733	+
BLCA	CCDC60	hsa.mir.1306	-
BLCA	CCDC60	hsa.mir.301b	-
BLCA	CCDC83	hsa.mir.16.1	+
BLCA	CCKBR	hsa.mir.876	+
BLCA	CCR3	hsa.mir.3662	+
BLCA	CCR3	hsa.mir.6818	+
BLCA	CCT4P1	hsa.mir.144	+
BLCA	CD36	hsa.mir.3662	-
BLCA	CECR3	hsa.mir.144	+
BLCA	CHGA	hsa.mir.876	+
BLCA	CHRM4	hsa.mir.885	+
BLCA	CHRNA4	hsa.mir.153.2	+
BLCA	CKS1BP3	hsa.mir.5703	+
BLCA	CLECL1	hsa.mir.3150b	+
BLCA	CLSTN2	hsa.mir.3662	+
BLCA	CNR2	hsa.mir.3150b	+
BLCA	CNTN2	hsa.mir.935	+
BLCA	COLCA1	hsa.mir.3662	-
BLCA	CPA1	hsa.mir.3662	+
BLCA	CPA1	hsa.mir.6503	+
BLCA	CPA1	hsa.mir.943	-
BLCA	CPED1	hsa.mir.708	-
BLCA	CRISP3	hsa.mir.15a	+
BLCA	CRISP3	hsa.mir.16.1	+
BLCA	CRISP3	hsa.mir.5579	-
BLCA	CRTAC1	hsa.mir.15a	+
BLCA	CRTAC1	hsa.mir.3613	+
BLCA	CSNK1G2P1	hsa.mir.144	+
BLCA	CSPG4P13	hsa.mir.203b	-
BLCA	CTCFL	hsa.mir.6502	+
BLCA	CTCFL	hsa.mir.873	-
BLCA	CTNNA3	hsa.mir.486	+
BLCA	CTSE	hsa.mir.4647	+
BLCA	CTSG	hsa.mir.16.1	-
BLCA	CXCL5	hsa.mir.3680.2	+
BLCA	CXCR2	hsa.mir.3200	-
BLCA	CYP1A1	hsa.mir.6844	+
BLCA	CYP2C19	hsa.mir.486	+
BLCA	CYP3A4	hsa.mir.486	+
BLCA	CYP4F8	hsa.mir.1227	+
BLCA	CYP4F8	hsa.mir.4745	+
BLCA	CYP4F8	hsa.mir.4746	+
BLCA	CYP4F8	hsa.mir.6885	+
BLCA	CYYR1-AS1	hsa.mir.144	+
BLCA	DAB1	hsa.mir.15a	-
BLCA	DAB1	hsa.mir.16.1	+
BLCA	DIRAS2	hsa.mir.943	+
BLCA	DIRC1	hsa.mir.3653	-
BLCA	DIRC1	hsa.mir.6818	-
BLCA	DLX1	hsa.mir.153.2	+
BLCA	DNAH8	hsa.mir.3653	+
BLCA	DNAH8	hsa.mir.486	+
BLCA	DNAJC6	hsa.mir.31	-
BLCA	DPYSL5	hsa.mir.885	+
BLCA	DRD2	hsa.mir.144	+
BLCA	DRD2	hsa.mir.451a	+
BLCA	DSPP	hsa.mir.486	+
BLCA	DSPP	hsa.mir.6805	+
BLCA	DTNA	hsa.mir.1976	-
BLCA	DTNA	hsa.mir.6731	-
BLCA	DTX1	hsa.mir.6754	-
BLCA	DUOXA2	hsa.mir.15a	+
BLCA	DUSP5P1	hsa.mir.3613	-
BLCA	ECHDC3	hsa.mir.3680.2	+
BLCA	EGFEM1P	hsa.mir.940	+
BLCA	EIF1AX-AS1	hsa.mir.486	+
BLCA	ELFN2	hsa.mir.3618	+
BLCA	EML5	hsa.mir.1247	-
BLCA	EML5	hsa.mir.3177	+
BLCA	EML5	hsa.mir.3610	+
BLCA	EML5	hsa.mir.3677	+
BLCA	EML5	hsa.mir.4647	-
BLCA	EML5	hsa.mir.6503	+
BLCA	EML5	hsa.mir.940	+
BLCA	ERVFRD-3	hsa.mir.144	+
BLCA	F2	hsa.mir.486	+
BLCA	FABP1	hsa.mir.1247	+
BLCA	FAM47A	hsa.mir.144	+
BLCA	FAM47C	hsa.mir.3662	-
BLCA	FCER1A	hsa.mir.6818	-
BLCA	FCRL1	hsa.mir.3150b	+
BLCA	FCRLA	hsa.mir.6818	-
BLCA	FENDRR	hsa.mir.3064	-
BLCA	FGF8	hsa.mir.320d.1	-
BLCA	FILIP1	hsa.mir.708	-
BLCA	FMO9P	hsa.mir.3140	+
BLCA	FSCB	hsa.mir.6805	+
BLCA	FXYD2	hsa.mir.943	-
BLCA	FZD9	hsa.mir.885	+
BLCA	GALNT8	hsa.mir.153.2	+
BLCA	GALNT8	hsa.mir.5579	+
BLCA	GALNT8	hsa.mir.6503	-
BLCA	GAPDHP39	hsa.mir.378i	+
BLCA	GATA5	hsa.mir.4660	-
BLCA	GC	hsa.mir.4524a	+
BLCA	GDNF-AS1	hsa.mir.6731	+
BLCA	GDNF	hsa.mir.6731	+
BLCA	GJA5	hsa.mir.3662	-
BLCA	GJB2	hsa.mir.3664	-
BLCA	GLDN	hsa.mir.30e	+
BLCA	GLP1R	hsa.mir.3653	+
BLCA	GPC3	hsa.mir.486	+
BLCA	GPR50	hsa.mir.153.2	+
BLCA	GPR52	hsa.mir.144	+
BLCA	GPX3	hsa.mir.144	+
BLCA	GRIA4	hsa.mir.3917	+
BLCA	GRIA4	hsa.mir.491	+
BLCA	GRIN2B	hsa.mir.365b	+
BLCA	GSTA1	hsa.mir.6844	-
BLCA	GSTA1	hsa.mir.7705	-
BLCA	HCN4	hsa.mir.153.2	+
BLCA	HELLPAR	hsa.mir.144	+
BLCA	HERC2P10	hsa.mir.144	+
BLCA	HES6	hsa.mir.4755	+
BLCA	HIC2	hsa.mir.3662	-
BLCA	HIST1H2BF	hsa.mir.5680	-
BLCA	HIST1H3F	hsa.mir.5703	+
BLCA	HIST1H4L	hsa.mir.3613	+
BLCA	HIST1H4L	hsa.mir.5003	+
BLCA	HMGB1P7	hsa.mir.144	+
BLCA	HNF1A-AS1	hsa.mir.1247	+
BLCA	HNF1A-AS1	hsa.mir.3064	+
BLCA	HNF1A-AS1	hsa.mir.320d.1	+
BLCA	HNF1A-AS1	hsa.mir.92b	-
BLCA	HOXB-AS3	hsa.mir.365b	-
BLCA	HSD3B1	hsa.mir.144	+
BLCA	HSD3B1	hsa.mir.4733	+
BLCA	HYAL4	hsa.mir.16.1	+
BLCA	HYAL4	hsa.mir.6818	+
BLCA	IDO1	hsa.mir.3917	-
BLCA	IGDCC3	hsa.mir.6818	+
BLCA	IGHEP2	hsa.mir.144	+
BLCA	IGHV3-29	hsa.let.7b	+
BLCA	IGKV2-29	hsa.mir.3662	-
BLCA	IGLON5	hsa.mir.935	+
BLCA	IL20RB	hsa.mir.3920	+
BLCA	IMPA1P1	hsa.mir.16.1	+
BLCA	IMPA1P1	hsa.mir.486	+
BLCA	INSL4	hsa.mir.6502	-
BLCA	INSL6	hsa.mir.486	+
BLCA	IQSEC3	hsa.mir.3662	-
BLCA	ITGAD	hsa.mir.16.1	+
BLCA	KCNB1	hsa.mir.1976	-
BLCA	KCNJ4	hsa.mir.153.2	+
BLCA	KCNMB2	hsa.mir.876	+
BLCA	KCTD8	hsa.mir.935	+
BLCA	KCTD9P1	hsa.mir.144	+
BLCA	KIAA0319	hsa.mir.3662	+
BLCA	KL	hsa.mir.708	-
BLCA	KLF3P1	hsa.mir.144	+
BLCA	KLHL33	hsa.mir.30c.1	-
BLCA	KLK10	hsa.mir.3680.2	+
BLCA	KLK12	hsa.mir.4791	+
BLCA	KLK8	hsa.mir.5579	-
BLCA	KRT16P1	hsa.mir.4443	+
BLCA	KRT24	hsa.mir.4766	+
BLCA	KRT3	hsa.mir.30c.1	-
BLCA	KRT6A	hsa.mir.4691	-
BLCA	KRT6A	hsa.mir.548d.1	-
BLCA	KRT73	hsa.mir.365b	+
BLCA	KRT78	hsa.mir.4791	+
BLCA	KRT79	hsa.mir.365b	+
BLCA	KRTAP24-1	hsa.mir.34b	+
BLCA	LCE3D	hsa.mir.3920	+
BLCA	LCE3D	hsa.mir.873	+
BLCA	LCN10	hsa.mir.3150b	+
BLCA	LDHC	hsa.mir.3200	+
BLCA	LDHC	hsa.mir.3653	+
BLCA	LEXM	hsa.mir.6510	+
BLCA	LGALS4	hsa.mir.5579	+
BLCA	LGSN	hsa.mir.16.1	+
BLCA	LGSN	hsa.mir.3200	+
BLCA	LINC00158	hsa.mir.3150b	+
BLCA	LINC00161	hsa.mir.7.3	-
BLCA	LINC00375	hsa.mir.3200	-
BLCA	LINC00375	hsa.mir.486	+
BLCA	LINC00375	hsa.mir.675	+
BLCA	LINC00379	hsa.mir.449b	+
BLCA	LINC00456	hsa.mir.1306	-
BLCA	LINC00456	hsa.mir.301b	-
BLCA	LINC00456	hsa.mir.6818	+
BLCA	LINC00462	hsa.mir.135a.1	+
BLCA	LINC00487	hsa.mir.627	+
BLCA	LINC00488	hsa.mir.3613	+
BLCA	LINC00643	hsa.mir.6805	+
BLCA	LINC00702	hsa.mir.1976	-
BLCA	LINC00702	hsa.mir.3917	-
BLCA	LINC00702	hsa.mir.6731	-
BLCA	LINC00862	hsa.mir.153.2	+
BLCA	LINC00896	hsa.mir.193a	+
BLCA	LINC00896	hsa.mir.4523	+
BLCA	LINC01030	hsa.mir.4647	-
BLCA	LINC01030	hsa.mir.5698	+
BLCA	LINC01081	hsa.mir.5571	-
BLCA	LINC01093	hsa.mir.144	+
BLCA	LINC01143	hsa.mir.3200	+
BLCA	LINC01146	hsa.mir.144	+
BLCA	LINC01146	hsa.mir.451a	+
BLCA	LINC01146	hsa.mir.4732	+
BLCA	LINC01395	hsa.mir.144	+
BLCA	LINC01508	hsa.mir.4491	+
BLCA	LINC01645	hsa.mir.16.1	+
BLCA	LINC01666	hsa.mir.6503	+
BLCA	LINC01895	hsa.mir.5703	+
BLCA	LINC02038	hsa.mir.15a	-
BLCA	LINC02038	hsa.mir.16.1	+
BLCA	LINC02038	hsa.mir.3613	-
BLCA	LINC02109	hsa.mir.144	+
BLCA	LINC02120	hsa.mir.144	+
BLCA	LINC02132	hsa.mir.3136	+
BLCA	LINC02132	hsa.mir.3150b	+
BLCA	LINC02417	hsa.mir.1305	+
BLCA	LINC02446	hsa.mir.1976	+
BLCA	LINC02532	hsa.mir.486	+
BLCA	LINC02823	hsa.mir.4647	-
BLCA	LINGO3	hsa.mir.153.2	+
BLCA	LMF1-AS1	hsa.mir.125b.1	+
BLCA	LMOD1	hsa.mir.1976	-
BLCA	LMOD1	hsa.mir.3064	-
BLCA	LRIT2	hsa.mir.135a.1	+
BLCA	LRIT2	hsa.mir.3136	+
BLCA	LRIT2	hsa.mir.4444.2	+
BLCA	LRRTM2	hsa.mir.486	+
BLCA	LRRTM2	hsa.mir.935	+
BLCA	LUARIS	hsa.mir.3662	+
BLCA	MACROD2-AS1	hsa.mir.6805	+
BLCA	MAGEA1	hsa.mir.6502	+
BLCA	MAGEA5	hsa.mir.3942	-
BLCA	MAGEA5	hsa.mir.627	-
BLCA	MAL2-AS1	hsa.mir.144	+
BLCA	MAL2-AS1	hsa.mir.4724	+
BLCA	MAP2	hsa.mir.3662	+
BLCA	MED15P4	hsa.mir.3200	+
BLCA	MIAT	hsa.mir.139	-
BLCA	MIAT	hsa.mir.5680	-
BLCA	MIAT	hsa.mir.876	+
BLCA	MIR1205	hsa.mir.4443	+
BLCA	MIR1205	hsa.mir.4791	+
BLCA	MIR1205	hsa.mir.6805	+
BLCA	MIR1205	hsa.mir.6844	+
BLCA	MIR1284	hsa.mir.144	+
BLCA	MIR3657	hsa.mir.4662a	+
BLCA	MIR3939	hsa.mir.144	+
BLCA	MIR4537	hsa.mir.3200	-
BLCA	MIR4539	hsa.mir.3200	-
BLCA	MIR5195	hsa.mir.153.2	-
BLCA	MIR5195	hsa.mir.627	+
BLCA	MIR519D	hsa.mir.144	+
BLCA	MIR526A2	hsa.mir.144	+
BLCA	MIR548Q	hsa.mir.33a	-
BLCA	MIR548Q	hsa.mir.581	+
BLCA	MIR623	hsa.mir.3920	-
BLCA	MIR944	hsa.mir.6805	+
BLCA	MKRN5P	hsa.mir.6818	+
BLCA	MRAP	hsa.mir.4745	-
BLCA	MRPL23-AS1	hsa.mir.4733	+
BLCA	MRPL40P1	hsa.mir.3613	+
BLCA	MT1H	hsa.mir.486	+
BLCA	MT1H	hsa.mir.6805	+
BLCA	MTCO1P27	hsa.mir.144	+
BLCA	MTND2P40	hsa.mir.144	+
BLCA	MTND4P11	hsa.mir.4662a	+
BLCA	MTND4P19	hsa.mir.144	+
BLCA	MTND5P15	hsa.mir.581	+
BLCA	MYH7B	hsa.mir.943	-
BLCA	MYOCD	hsa.mir.1976	-
BLCA	MYOM1	hsa.mir.708	-
BLCA	MYOZ2	hsa.mir.423	-
BLCA	MYOZ2	hsa.mir.632	-
BLCA	MYT1L	hsa.mir.885	+
BLCA	NAA11	hsa.mir.144	-
BLCA	NAA11	hsa.mir.4522	-
BLCA	NAA11	hsa.mir.4523	+
BLCA	NAA11	hsa.mir.4732	-
BLCA	NAA11	hsa.mir.632	-
BLCA	NAT8	hsa.mir.30e	+
BLCA	NBPF22P	hsa.mir.144	+
BLCA	NCAM1	hsa.mir.3613	+
BLCA	NIBAN3	hsa.mir.3150b	+
BLCA	NKX2-5	hsa.mir.153.2	+
BLCA	NOL4	hsa.mir.153.2	+
BLCA	NOL4	hsa.mir.5579	+
BLCA	NOL4	hsa.mir.873	+
BLCA	NOL4	hsa.mir.876	+
BLCA	NPIPB8	hsa.mir.144	+
BLCA	NR1I2	hsa.mir.486	-
BLCA	NRAD1	hsa.mir.486	+
BLCA	NRCAM	hsa.mir.3662	+
BLCA	NUTM2HP	hsa.mir.30e	+
BLCA	NUTM2HP	hsa.mir.3613	+
BLCA	NUTM2HP	hsa.mir.548k	+
BLCA	OGDHL	hsa.mir.153.2	+
BLCA	OGN	hsa.mir.5579	-
BLCA	OR10H5	hsa.mir.3193	+
BLCA	OR10H5	hsa.mir.3653	+
BLCA	OR10H5	hsa.mir.491	+
BLCA	OR10H5	hsa.mir.744	+
BLCA	OR10H5	hsa.mir.876	-
BLCA	OR13D3P	hsa.mir.144	+
BLCA	OR2I1P	hsa.mir.3662	+
BLCA	OR5AC4P	hsa.mir.144	+
BLCA	OR5BH1P	hsa.mir.2115	+
BLCA	OR8B6P	hsa.mir.144	+
BLCA	ORM1	hsa.mir.100	-
BLCA	ORM1	hsa.mir.3680.2	-
BLCA	ORM1	hsa.mir.4645	+
BLCA	ORM1	hsa.mir.597	-
BLCA	OTX2	hsa.mir.1269b	+
BLCA	PAX5	hsa.mir.3940	+
BLCA	PAX5	hsa.mir.5699	-
BLCA	PAX5	hsa.mir.873	+
BLCA	PCDH10	hsa.mir.144	+
BLCA	PCDH10	hsa.mir.4662a	+
BLCA	PCDH10	hsa.mir.4724	+
BLCA	PCDH9	hsa.mir.3664	+
BLCA	PCDHGB8P	hsa.mir.144	+
BLCA	PCDHGB8P	hsa.mir.365b	+
BLCA	PCDHGB8P	hsa.mir.4523	-
BLCA	PCDHGB8P	hsa.mir.632	-
BLCA	PCDHGB9P	hsa.mir.144	+
BLCA	PCDHGB9P	hsa.mir.423	-
BLCA	PCGEM1	hsa.mir.125b.1	+
BLCA	PCOLCE2	hsa.mir.193a	+
BLCA	PCOLCE2	hsa.mir.4522	-
BLCA	PCOLCE2	hsa.mir.632	-
BLCA	PDZD3	hsa.mir.1247	+
BLCA	PDZD3	hsa.mir.16.1	+
BLCA	PDZD3	hsa.mir.203b	-
BLCA	PDZD3	hsa.mir.943	-
BLCA	PES1P2	hsa.mir.125b.1	+
BLCA	PLA2G2A	hsa.mir.3613	-
BLCA	PLA2G2C	hsa.mir.943	-
BLCA	PLP1	hsa.mir.15a	-
BLCA	PLP1	hsa.mir.3613	-
BLCA	PNLDC1	hsa.mir.548d.2	-
BLCA	PNLDC1	hsa.mir.6510	-
BLCA	PNMA6B	hsa.mir.935	+
BLCA	PPARGC1A	hsa.mir.6503	-
BLCA	PPP1R1B	hsa.mir.943	+
BLCA	PPP2R2C	hsa.mir.3662	+
BLCA	PRAMENP	hsa.mir.3150b	+
BLCA	PSORS1C3	hsa.mir.943	+
BLCA	PSPHP1	hsa.mir.4524a	-
BLCA	PSPHP1	hsa.mir.548d.2	-
BLCA	PTCHD3P3	hsa.mir.144	+
BLCA	PTHLH	hsa.mir.6503	-
BLCA	PTPRR	hsa.mir.153.2	+
BLCA	PURG	hsa.mir.1227	-
BLCA	PURG	hsa.mir.3187	-
BLCA	PURG	hsa.mir.3940	+
BLCA	PURG	hsa.mir.4745	+
BLCA	PURG	hsa.mir.4746	+
BLCA	PURG	hsa.mir.6885	+
BLCA	PURG	hsa.mir.7.3	-
BLCA	PZP	hsa.mir.4647	+
BLCA	RAB42P1	hsa.mir.144	+
BLCA	RAC1P9	hsa.mir.1284	+
BLCA	RAC1P9	hsa.mir.3187	+
BLCA	RAC1P9	hsa.mir.3667	+
BLCA	RAC1P9	hsa.mir.4762	+
BLCA	RANBP3L	hsa.mir.1976	-
BLCA	RANBP3L	hsa.mir.3917	-
BLCA	RANBP3L	hsa.mir.6731	-
BLCA	RANBP3L	hsa.mir.708	-
BLCA	RASSF9	hsa.mir.5579	+
BLCA	RELN	hsa.mir.885	+
BLCA	RGMA	hsa.mir.3664	-
BLCA	RGMA	hsa.mir.548k	-
BLCA	RGMA	hsa.mir.7113	-
BLCA	RIMKLA	hsa.mir.153.2	-
BLCA	RIMS4	hsa.mir.153.2	+
BLCA	RN7SL338P	hsa.mir.144	+
BLCA	RN7SL382P	hsa.mir.103a.1	-
BLCA	RN7SL552P	hsa.mir.3662	-
BLCA	RN7SL569P	hsa.mir.144	+
BLCA	RN7SL68P	hsa.mir.144	+
BLCA	RNA5SP123	hsa.mir.144	+
BLCA	RNA5SP18	hsa.mir.4647	-
BLCA	RNA5SP33	hsa.mir.144	+
BLCA	RNF126P1	hsa.mir.3920	-
BLCA	RNF138P1	hsa.mir.144	+
BLCA	RNU2-29P	hsa.mir.144	+
BLCA	RNU5E-4P	hsa.mir.144	+
BLCA	RNU6-203P	hsa.mir.144	+
BLCA	RNU6-249P	hsa.mir.144	+
BLCA	RNU6-711P	hsa.mir.4691	+
BLCA	RNU6-795P	hsa.mir.144	+
BLCA	RNU6-87P	hsa.mir.4762	+
BLCA	RNU6ATAC	hsa.mir.6805	+
BLCA	RNY4P17	hsa.mir.144	+
BLCA	RORB	hsa.mir.548k	-
BLCA	RPL12P9	hsa.mir.144	+
BLCA	RPL12P9	hsa.mir.4523	-
BLCA	RPL23AP90	hsa.mir.451a	+
BLCA	RPL36AP13	hsa.mir.378d.2	+
BLCA	RPL7AP52	hsa.mir.144	+
BLCA	RPL7P39	hsa.mir.144	+
BLCA	RPS14P4	hsa.mir.1249	+
BLCA	RSPO2	hsa.mir.16.1	-
BLCA	RSPO2	hsa.mir.3613	-
BLCA	SALRNA2	hsa.mir.3177	+
BLCA	SCARA5	hsa.mir.139	+
BLCA	SCARNA21	hsa.mir.144	+
BLCA	SCARNA21	hsa.mir.4522	+
BLCA	SCARNA21	hsa.mir.6805	+
BLCA	SCEL	hsa.mir.3920	+
BLCA	SCEL	hsa.mir.708	-
BLCA	SCG3	hsa.mir.876	+
BLCA	SEC24AP1	hsa.mir.144	+
BLCA	SERPINA12	hsa.mir.6731	+
BLCA	SERPINA12	hsa.mir.744	+
BLCA	SGCZ	hsa.mir.597	-
BLCA	SH3PXD2A-AS1	hsa.mir.3940	+
BLCA	SH3PXD2A-AS1	hsa.mir.7.3	+
BLCA	SHISAL1	hsa.mir.1976	-
BLCA	SIX2	hsa.mir.3662	+
BLCA	SLC10A6	hsa.mir.3680.2	+
BLCA	SLC15A5	hsa.mir.144	+
BLCA	SLC17A1	hsa.mir.16.1	+
BLCA	SLC17A6	hsa.mir.876	+
BLCA	SLC28A1	hsa.mir.3662	-
BLCA	SLC2A4	hsa.mir.1976	+
BLCA	SLC2A4	hsa.mir.3653	+
BLCA	SLC2A4	hsa.mir.3917	+
BLCA	SLC7A11	hsa.mir.6502	+
BLCA	SMIM31	hsa.mir.6510	+
BLCA	SMIM36	hsa.mir.144	+
BLCA	SMIM36	hsa.mir.4728	-
BLCA	SNORA12	hsa.mir.6805	+
BLCA	SNORA54	hsa.mir.6805	+
BLCA	SNORD116-1	hsa.mir.144	+
BLCA	SNORD116-14	hsa.mir.144	+
BLCA	SNORD116-26	hsa.mir.144	+
BLCA	SNORD116-29	hsa.mir.144	+
BLCA	SNORD116-29	hsa.mir.4647	-
BLCA	SNORD116-6	hsa.mir.144	+
BLCA	SNORD15B	hsa.mir.6805	+
BLCA	SNTG1	hsa.mir.3662	-
BLCA	SOCS5P5	hsa.mir.144	+
BLCA	SORBS1	hsa.mir.708	-
BLCA	SORCS1	hsa.mir.16.1	-
BLCA	SPDYE22P	hsa.mir.144	+
BLCA	SPINK14	hsa.mir.451a	+
BLCA	STMND1	hsa.mir.1229	+
BLCA	STMND1	hsa.mir.3200	+
BLCA	STUM	hsa.mir.193a	-
BLCA	STUM	hsa.mir.423	-
BLCA	STUM	hsa.mir.4733	-
BLCA	SULT1C2	hsa.mir.4662a	-
BLCA	SULT1C2	hsa.mir.5680	+
BLCA	SYCP2	hsa.mir.16.1	+
BLCA	SYCP2	hsa.mir.320d.1	+
BLCA	SYCP2	hsa.mir.3613	-
BLCA	SYNJ2-IT1	hsa.mir.144	+
BLCA	TAF9BP1	hsa.mir.144	+
BLCA	TAS1R3	hsa.mir.4691	+
BLCA	TAS1R3	hsa.mir.5699	-
BLCA	TAS2R46	hsa.mir.144	+
BLCA	TAT-AS1	hsa.mir.153.2	+
BLCA	TBX20	hsa.mir.1976	-
BLCA	TCAM1P	hsa.mir.203b	+
BLCA	TECTB	hsa.mir.486	+
BLCA	TENM3	hsa.mir.548k	+
BLCA	TEX26	hsa.mir.103a.1	-
BLCA	TF	hsa.mir.16.1	+
BLCA	TF	hsa.mir.3920	-
BLCA	TF	hsa.mir.943	-
BLCA	TGM6	hsa.mir.597	+
BLCA	THEG	hsa.mir.15a	+
BLCA	THSD4-AS1	hsa.mir.5579	-
BLCA	THSD4-AS1	hsa.mir.708	+
BLCA	TIMM8AP1	hsa.mir.6818	-
BLCA	TLR10	hsa.mir.1269b	+
BLCA	TLR10	hsa.mir.3150b	+
BLCA	TM4SF19	hsa.mir.7113	+
BLCA	TMEM132C	hsa.mir.139	+
BLCA	TMEM132D	hsa.mir.486	-
BLCA	TMEM132D	hsa.mir.548k	+
BLCA	TMEM191C	hsa.mir.3662	-
BLCA	TMEM88B	hsa.mir.3680.2	-
BLCA	TMPRSS11A	hsa.mir.6510	+
BLCA	TNFSF18	hsa.mir.1976	+
BLCA	TRAV30	hsa.mir.16.1	+
BLCA	TRAV30	hsa.mir.30e	+
BLCA	TRIM43CP	hsa.mir.548d.1	-
BLCA	TTC29	hsa.mir.320d.1	+
BLCA	UBD	hsa.mir.3662	+
BLCA	UCHL1	hsa.mir.3662	+
BLCA	UGT1A9	hsa.mir.210	-
BLCA	UGT2B10	hsa.mir.3920	+
BLCA	UGT2B10	hsa.mir.5579	+
BLCA	VAV3-AS1	hsa.mir.3150b	+
BLCA	VGLL2	hsa.mir.218.2	+
BLCA	VGLL2	hsa.mir.6511b.1	+
BLCA	VSIG10L	hsa.mir.3662	+
BLCA	VSNL1	hsa.mir.3680.2	+
BLCA	VSTM2L	hsa.mir.3200	-
BLCA	VTI1BP4	hsa.mir.144	+
BLCA	WFDC10A	hsa.mir.6818	+
BLCA	XIAPP3	hsa.mir.144	+
BLCA	XIAPP3	hsa.mir.4523	-
BLCA	XIRP1	hsa.mir.3680.2	-
BLCA	ZBBX	hsa.mir.15a	+
BLCA	ZBBX	hsa.mir.16.1	+
BLCA	ZBBX	hsa.mir.320d.1	-
BLCA	ZDHHC22	hsa.mir.153.2	+
BLCA	ZKSCAN7P1	hsa.mir.144	+
BLCA	ZNF98	hsa.mir.6503	+
BLCA	ZPLD1	hsa.mir.6731	-
BLCA	ZSCAN5DP	hsa.mir.3662	-
BRCA	SMC1B	hsa.mir.744	+
BRCA	CHGB	hsa.mir.744	+
BRCA	TBL1Y	hsa.mir.744	-
BRCA	TDRD1	hsa.mir.744	+
BRCA	MAGEB2	hsa.mir.744	+
BRCA	PCDH11Y	hsa.mir.744	-
BRCA	SEZ6L	hsa.mir.744	+
BRCA	PCDH11X	hsa.mir.744	-
BRCA	AMBP	hsa.mir.744	-
BRCA	RLN2	hsa.mir.744	+
BRCA	PRMT8	hsa.mir.744	+
BRCA	ART4	hsa.mir.744	+
BRCA	BTNL8	hsa.mir.744	-
BRCA	CCL20	hsa.mir.744	+
BRCA	PDC	hsa.mir.339	+
BRCA	PLPPR5	hsa.mir.339	-
BRCA	CNR1	hsa.mir.744	+
BRCA	PPP4R4	hsa.mir.744	+
BRCA	NKX2-3	hsa.mir.1343	+
BRCA	TNFSF11	hsa.mir.4522	-
BRCA	CRISPLD1	hsa.mir.4522	+
BRCA	SPINK4	hsa.mir.339	+
BRCA	PLP1	hsa.mir.744	-
BRCA	SLPI	hsa.mir.1343	-
BRCA	ARHGAP40	hsa.mir.339	-
BRCA	CHST8	hsa.mir.339	+
BRCA	KIRREL2	hsa.mir.339	-
BRCA	AVPR2	hsa.mir.339	-
BRCA	TSPAN8	hsa.mir.642a	+
BRCA	GAD1	hsa.mir.744	+
BRCA	HOXD13	hsa.mir.1343	+
BRCA	KCNC1	hsa.mir.744	+
BRCA	TPH1	hsa.mir.744	+
BRCA	NXNL2	hsa.mir.330	-
BRCA	NXNL2	hsa.mir.769	-
BRCA	UNC13A	hsa.mir.744	+
BRCA	KLHDC7B	hsa.mir.1343	-
BRCA	GATA5	hsa.mir.330	+
BRCA	BPIFA2	hsa.mir.769	-
BRCA	IDO1	hsa.mir.1343	-
BRCA	G6PC	hsa.mir.3190	-
BRCA	G6PC	hsa.mir.330	-
BRCA	PPP1R1B	hsa.mir.3190	-
BRCA	PPP1R1B	hsa.mir.320e	+
BRCA	PPP1R1B	hsa.mir.642a	-
BRCA	NR0B2	hsa.mir.3191	-
BRCA	NR0B2	hsa.mir.320e	-
BRCA	NR0B2	hsa.mir.330	+
BRCA	NR0B2	hsa.mir.642a	+
BRCA	NR0B2	hsa.mir.769	-
BRCA	LIN28A	hsa.mir.3190	+
BRCA	LIN28A	hsa.mir.3191	+
BRCA	SLC6A11	hsa.mir.1291	+
BRCA	RGS22	hsa.mir.744	+
BRCA	HAPLN2	hsa.mir.31	-
BRCA	TPTE2	hsa.mir.339	+
BRCA	CHRM3	hsa.mir.1343	+
BRCA	TMCC2	hsa.mir.320e	+
BRCA	STOML3	hsa.mir.744	-
BRCA	BEX1	hsa.mir.3191	-
BRCA	SEC14L4	hsa.mir.339	+
BRCA	ADAM20	hsa.mir.339	-
BRCA	PEBP4	hsa.mir.339	+
BRCA	CHL1	hsa.mir.339	-
BRCA	LPIN1	hsa.mir.1291	+
BRCA	SLCO1B1	hsa.mir.339	-
BRCA	DSG3	hsa.mir.1291	-
BRCA	DSG3	hsa.mir.330	+
BRCA	DSG3	hsa.mir.769	-
BRCA	PSAT1	hsa.mir.339	+
BRCA	HRK	hsa.mir.1291	+
BRCA	CHAD	hsa.mir.642a	+
BRCA	CHAD	hsa.mir.769	-
BRCA	GALNT5	hsa.mir.642a	+
BRCA	GALNT5	hsa.mir.769	-
BRCA	SCN7A	hsa.mir.3190	-
BRCA	SCN7A	hsa.mir.3191	-
BRCA	SCN7A	hsa.mir.330	-
BRCA	SCN7A	hsa.mir.339	-
BRCA	SCN7A	hsa.mir.642a	-
BRCA	SCN7A	hsa.mir.769	-
BRCA	IL36RN	hsa.mir.339	+
BRCA	WDR38	hsa.mir.1343	+
BRCA	CCL21	hsa.mir.339	-
BRCA	DMRT1	hsa.mir.1343	+
BRCA	MMP7	hsa.mir.1343	-
BRCA	FXYD6	hsa.mir.1291	-
BRCA	CLCA2	hsa.mir.744	-
BRCA	DNASE2B	hsa.mir.1291	-
BRCA	RBP4	hsa.mir.3191	-
BRCA	RBP4	hsa.mir.320e	-
BRCA	RBP4	hsa.mir.642a	-
BRCA	MMRN1	hsa.mir.3190	-
BRCA	MMRN1	hsa.mir.3191	-
BRCA	MMRN1	hsa.mir.339	-
BRCA	MMRN1	hsa.mir.642a	-
BRCA	MMRN1	hsa.mir.769	-
BRCA	INHBE	hsa.mir.31	+
BRCA	KERA	hsa.mir.330	-
BRCA	KERA	hsa.mir.642a	-
BRCA	KERA	hsa.mir.769	-
BRCA	RTN1	hsa.mir.1291	-
BRCA	IGF1R	hsa.mir.1291	+
BRCA	LMAN1L	hsa.mir.3191	+
BRCA	LMAN1L	hsa.mir.320e	+
BRCA	WDR93	hsa.mir.1291	-
BRCA	TICRR	hsa.mir.1224	+
BRCA	TICRR	hsa.mir.1291	+
BRCA	LRRC46	hsa.mir.1291	-
BRCA	ABCA8	hsa.mir.3191	-
BRCA	ABCA8	hsa.mir.320e	-
BRCA	ABCA8	hsa.mir.339	-
BRCA	ABCA8	hsa.mir.642a	-
BRCA	ABCA8	hsa.mir.769	-
BRCA	C17orf64	hsa.mir.3190	-
BRCA	IMPA2	hsa.mir.1291	+
BRCA	PADI1	hsa.mir.320e	-
BRCA	KIF2C	hsa.mir.1291	+
BRCA	ANXA9	hsa.mir.1291	-
BRCA	HORMAD1	hsa.mir.1224	+
BRCA	HORMAD1	hsa.mir.769	+
BRCA	KCNH1	hsa.mir.1291	+
BRCA	HHIPL2	hsa.let.7b	-
BRCA	HHIPL2	hsa.mir.3667	-
BRCA	HHIPL2	hsa.mir.4762	+
BRCA	AQP10	hsa.mir.1291	-
BRCA	NT5DC4	hsa.mir.5687	+
BRCA	CDCA7	hsa.mir.1343	+
BRCA	CCDC150	hsa.mir.581	+
BRCA		hsa.mir.1291	+
BRCA	MYO10	hsa.mir.581	+
BRCA	MYO10	hsa.mir.582	+
BRCA	SKP2	hsa.mir.581	+
BRCA	SKP2	hsa.mir.582	+
BRCA	HAPLN1	hsa.mir.5687	+
BRCA	IQGAP2	hsa.mir.1291	-
BRCA	CXCL14	hsa.mir.642a	+
BRCA	CPLX2	hsa.mir.1291	+
BRCA	DCDC2	hsa.mir.1291	-
BRCA	DCDC2	hsa.mir.4522	-
BRCA	TNFRSF21	hsa.mir.5687	+
BRCA	TNFRSF21	hsa.mir.582	+
BRCA	MLIP	hsa.mir.1291	-
BRCA	PM20D2	hsa.mir.582	+
BRCA	LINC01558	hsa.mir.5687	+
BRCA	EGFR	hsa.mir.1910	+
BRCA	EGFR	hsa.mir.449b	+
BRCA	EGFR	hsa.mir.5687	-
BRCA	IGSF1	hsa.mir.642a	+
BRCA	RGS20	hsa.mir.582	+
BRCA	RSPO2	hsa.mir.5687	+
BRCA	RSPO2	hsa.mir.581	-
BRCA	RSPO2	hsa.mir.582	+
BRCA	FAM83A	hsa.mir.31	+
BRCA	FAM83A	hsa.mir.3190	-
BRCA	FAM83A	hsa.mir.3191	+
BRCA	FAM83A	hsa.mir.320e	-
BRCA	FAM83A	hsa.mir.330	+
BRCA	FAM83A	hsa.mir.642a	+
BRCA	FAM83A	hsa.mir.744	-
BRCA	FAM83A	hsa.mir.769	-
BRCA	FAM135B	hsa.mir.330	-
BRCA	FAM135B	hsa.mir.642a	+
BRCA	FAM135B	hsa.mir.769	-
BRCA	NTRK2	hsa.let.7a.3	+
BRCA	NTRK2	hsa.mir.4763	+
BRCA	NTRK2	hsa.mir.744	+
BRCA	NTRK2	hsa.mir.769	-
BRCA	ZNF462	hsa.mir.582	+
BRCA	PDSS1	hsa.mir.581	+
BRCA	PDSS1	hsa.mir.582	+
BRCA	SLC39A12	hsa.mir.7854	+
BRCA	ANKRD30A	hsa.mir.330	-
BRCA	ANKRD30A	hsa.mir.642a	+
BRCA	CDHR1	hsa.mir.5687	+
BRCA	HABP2	hsa.mir.642a	+
BRCA	ADAM33	hsa.mir.339	-
BRCA	CHEK1	hsa.mir.582	+
BRCA	SCN2B	hsa.mir.3190	-
BRCA	SCN2B	hsa.mir.3191	-
BRCA	SCN2B	hsa.mir.330	-
BRCA	SCN2B	hsa.mir.339	-
BRCA	SCN2B	hsa.mir.642a	-
BRCA	SCN2B	hsa.mir.769	-
BRCA	HMGA2	hsa.mir.1343	+
BRCA	CNKSR2	hsa.mir.582	+
BRCA	MKX	hsa.mir.744	+
BRCA	FRMPD2B	hsa.mir.1291	-
BRCA	MAT1A	hsa.mir.3190	+
BRCA	MAT1A	hsa.mir.320e	+
BRCA	THRSP	hsa.mir.1291	+
BRCA	ITIH2	hsa.mir.330	-
BRCA	KCNJ1	hsa.mir.5687	-
BRCA	KCNJ1	hsa.mir.581	+
BRCA	KCNJ1	hsa.mir.582	+
BRCA	ZNF385D	hsa.mir.1291	-
BRCA	ZNF385D	hsa.mir.642a	+
BRCA	ZNF385D	hsa.mir.769	-
BRCA	CCDC175	hsa.mir.744	+
BRCA	GFRA1	hsa.mir.1291	+
BRCA	TMEM132D	hsa.mir.1291	-
BRCA	SCHIP1	hsa.mir.449b	-
BRCA	SCHIP1	hsa.mir.5687	+
BRCA	SCHIP1	hsa.mir.581	+
BRCA	CCDC74B	hsa.mir.1291	-
BRCA	TUBA3E	hsa.mir.339	+
BRCA	TCF7L1	hsa.mir.582	+
BRCA	SUV39H2	hsa.mir.581	+
BRCA	SUV39H2	hsa.mir.582	+
BRCA	SLC16A12	hsa.mir.330	-
BRCA	SLC16A12	hsa.mir.339	-
BRCA	SLC16A12	hsa.mir.769	-
BRCA	ACMSD	hsa.mir.1291	+
BRCA	ADGRF4	hsa.mir.31	+
BRCA	ADGRF4	hsa.mir.7854	-
BRCA	PLEKHG4B	hsa.mir.582	+
BRCA	CNKSR3	hsa.mir.1910	-
BRCA	DNAAF1	hsa.mir.1291	-
BRCA	UCHL1	hsa.mir.1343	+
BRCA	WNT3A	hsa.mir.3191	+
BRCA	WNT3A	hsa.mir.769	+
BRCA	C10orf90	hsa.mir.5687	+
BRCA	PSMA8	hsa.mir.582	+
BRCA	SKA1	hsa.mir.581	+
BRCA	SKA1	hsa.mir.582	+
BRCA	RAB6B	hsa.mir.1224	+
BRCA	SLC16A1	hsa.mir.5687	+
BRCA	SLC16A1	hsa.mir.582	+
BRCA	SPAG17	hsa.mir.1291	-
BRCA	PSD3	hsa.mir.1291	-
BRCA	ADAMTS3	hsa.mir.5687	+
BRCA	ART3	hsa.mir.769	+
BRCA	SORCS3	hsa.mir.3667	+
BRCA	SORCS3	hsa.mir.4762	-
BRCA	NMNAT2	hsa.mir.1910	-
BRCA	ATP2B2	hsa.mir.3913.1	-
BRCA	TIMP4	hsa.mir.339	-
BRCA	CACNA1D	hsa.mir.1291	-
BRCA	MUM1L1	hsa.mir.1291	-
BRCA	SLC34A2	hsa.mir.582	-
BRCA	TRIM63	hsa.mir.1343	-
BRCA	MRAS	hsa.mir.5687	+
BRCA	MRAS	hsa.mir.582	+
BRCA	TMSB15B	hsa.mir.5687	+
BRCA	CATIP	hsa.mir.1291	-
BRCA	PAGE5	hsa.mir.1224	+
BRCA	CLIC6	hsa.mir.1291	-
BRCA	CLIC6	hsa.mir.3191	+
BRCA	CLIC6	hsa.mir.320e	+
BRCA	CLIC6	hsa.mir.339	+
BRCA	BTG2	hsa.mir.1291	-
BRCA	BTG2	hsa.mir.3190	-
BRCA	BTG2	hsa.mir.3191	-
BRCA	BTG2	hsa.mir.642a	-
BRCA	CARMIL2	hsa.mir.1910	-
BRCA	LYPD5	hsa.mir.582	+
BRCA	TFF1	hsa.mir.1291	+
BRCA	TFF1	hsa.mir.339	+
BRCA	PDE9A	hsa.mir.582	+
BRCA	CBS	hsa.mir.1291	+
BRCA	TMEM190	hsa.mir.1291	-
BRCA	TMEM190	hsa.mir.744	-
BRCA	MYL3	hsa.mir.339	-
BRCA	LY6K	hsa.mir.1224	+
BRCA	SCGB3A1	hsa.mir.3191	-
BRCA	SCGB3A1	hsa.mir.330	-
BRCA	SCGB3A1	hsa.mir.642a	+
BRCA	FAM171A2	hsa.mir.582	+
BRCA	UBXN10	hsa.mir.1291	-
BRCA	PIGR	hsa.mir.6502	+
BRCA	KCNF1	hsa.mir.1291	-
BRCA	C2orf48	hsa.mir.1291	+
BRCA	ACTG2	hsa.mir.1224	+
BRCA	ACTG2	hsa.mir.5687	+
BRCA	ANKRD30BL	hsa.mir.582	+
BRCA	NOSTRIN	hsa.mir.1291	-
BRCA	NOSTRIN	hsa.mir.3191	-
BRCA	NOSTRIN	hsa.mir.330	-
BRCA	NOSTRIN	hsa.mir.769	-
BRCA	C1QTNF7	hsa.mir.1291	-
BRCA	C1QTNF7	hsa.mir.339	-
BRCA	TGFA	hsa.mir.5687	-
BRCA	NIPAL1	hsa.mir.582	+
BRCA	INAVA	hsa.mir.330	+
BRCA	LINC01116	hsa.mir.1291	-
BRCA	CCKAR	hsa.mir.1291	-
BRCA	CCKAR	hsa.mir.3190	-
BRCA	CCKAR	hsa.mir.330	-
BRCA	CCKAR	hsa.mir.642a	-
BRCA	CCKAR	hsa.mir.769	-
BRCA	IGFN1	hsa.mir.1291	-
BRCA	IGFN1	hsa.mir.3191	-
BRCA	IGFN1	hsa.mir.642a	-
BRCA	IGFN1	hsa.mir.769	-
BRCA	CXCR1	hsa.mir.1291	-
BRCA	FCRL1	hsa.let.7a.3	+
BRCA	FCRL1	hsa.mir.3667	+
BRCA	SERPINI1	hsa.mir.1291	+
BRCA	DNASE1L3	hsa.mir.339	-
BRCA	FANCD2OS	hsa.mir.449a	+
BRCA	FANCD2OS	hsa.mir.581	-
BRCA	FANCD2OS	hsa.mir.582	+
BRCA	PCOLCE2	hsa.mir.5687	+
BRCA	CXCL3	hsa.mir.5687	-
BRCA	CPA3	hsa.mir.1291	-
BRCA	GRIK3	hsa.mir.1291	+
BRCA	DNALI1	hsa.mir.1291	-
BRCA	RFC4	hsa.mir.1224	+
BRCA	CDC25A	hsa.mir.1291	+
BRCA	CAMP	hsa.mir.4522	-
BRCA	HPGD	hsa.mir.339	-
BRCA	ACSL6	hsa.mir.1224	+
BRCA	ACSL6	hsa.mir.582	+
BRCA	CSF2	hsa.mir.769	-
BRCA	SHROOM1	hsa.mir.330	-
BRCA	GDF9	hsa.mir.3678	-
BRCA	DACT2	hsa.mir.31	+
BRCA	PI16	hsa.mir.769	-
BRCA	FABP5	hsa.mir.1224	-
BRCA	TRPV6	hsa.mir.449a	-
BRCA	TRPV6	hsa.mir.449b	-
BRCA	TRPV6	hsa.mir.582	+
BRCA	ANKS6	hsa.mir.5687	+
BRCA	FBP1	hsa.mir.1291	-
BRCA	PTCHD1	hsa.mir.1224	+
BRCA	RNF183	hsa.mir.31	+
BRCA	MELK	hsa.mir.1291	+
BRCA	MELK	hsa.mir.581	+
BRCA	MELK	hsa.mir.582	+
BRCA	SLC7A3	hsa.mir.142	-
BRCA	SLC7A3	hsa.mir.152	-
BRCA	SLC7A3	hsa.mir.21	-
BRCA	SLC7A3	hsa.mir.3064	-
BRCA	SLC7A3	hsa.mir.338	-
BRCA	SLC7A3	hsa.mir.3615	-
BRCA	SLC7A3	hsa.mir.3678	-
BRCA	SLC7A3	hsa.mir.454	-
BRCA	SLC7A3	hsa.mir.4726	-
BRCA	SLC7A3	hsa.mir.4728	-
BRCA	SLC7A3	hsa.mir.5010	-
BRCA	SLC7A3	hsa.mir.636	-
BRCA	SLC7A3	hsa.mir.6781	-
BRCA	SLC7A3	hsa.mir.6783	-
BRCA	PHYHIPL	hsa.mir.582	+
BRCA	PHOX2A	hsa.mir.1343	+
BRCA	SKA3	hsa.mir.581	+
BRCA	SKA3	hsa.mir.582	+
BRCA	SLC18A2	hsa.mir.1291	-
BRCA	VWA2	hsa.mir.1291	-
BRCA	LARGE2	hsa.mir.5687	+
BRCA	LARGE2	hsa.mir.582	+
BRCA	PDZRN4	hsa.mir.1343	-
BRCA	PDZRN4	hsa.mir.330	+
BRCA	PDZRN4	hsa.mir.642a	+
BRCA	PDZRN4	hsa.mir.769	-
BRCA	NELL1	hsa.mir.4522	-
BRCA		hsa.mir.744	-
BRCA	GPT2	hsa.mir.5687	+
BRCA	GPT2	hsa.mir.582	+
BRCA	WDR72	hsa.mir.4714	+
BRCA	CLEC4D	hsa.let.7a.3	-
BRCA	CLEC4D	hsa.mir.3667	+
BRCA	RRAD	hsa.mir.339	-
BRCA	TAC3	hsa.mir.3691	+
BRCA	TAC3	hsa.mir.5683	+
BRCA	CHP2	hsa.mir.1910	-
BRCA	CHP2	hsa.mir.3190	-
BRCA	CHP2	hsa.mir.339	-
BRCA	CHP2	hsa.mir.4645	-
BRCA	CHP2	hsa.mir.6720	+
BRCA	CHP2	hsa.mir.744	-
BRCA	MS4A6E	hsa.mir.3191	-
BRCA	MS4A6E	hsa.mir.642a	-
BRCA	MS4A14	hsa.mir.1291	-
BRCA	CCDC178	hsa.mir.3191	-
BRCA	CCDC178	hsa.mir.642a	-
BRCA	CCDC178	hsa.mir.769	-
BRCA	MMP26	hsa.let.7b	+
BRCA	CORO6	hsa.mir.1291	-
BRCA	PLIN4	hsa.mir.1291	+
BRCA		hsa.mir.582	+
BRCA	SCARA5	hsa.mir.769	-
BRCA	PTGDR	hsa.mir.744	+
BRCA	NT5DC2	hsa.mir.582	+
BRCA	CX3CR1	hsa.mir.330	-
BRCA	CX3CR1	hsa.mir.769	-
BRCA	TNXB	hsa.mir.3191	-
BRCA	TNXB	hsa.mir.320e	-
BRCA	TNXB	hsa.mir.330	-
BRCA	TNXB	hsa.mir.339	-
BRCA	TNXB	hsa.mir.642a	-
BRCA	TNXB	hsa.mir.769	-
BRCA	CAVIN2	hsa.mir.3191	-
BRCA	CAVIN2	hsa.mir.769	-
BRCA	CHRM1	hsa.mir.582	+
BRCA	LRP1B	hsa.mir.1291	-
BRCA	LRP1B	hsa.mir.330	+
BRCA	HTR1E	hsa.mir.1291	+
BRCA	ATOH8	hsa.mir.339	-
BRCA	SLC49A3	hsa.mir.1291	-
BRCA	AR	hsa.mir.1291	-
BRCA	ARMC4	hsa.mir.744	+
BRCA	CXCL11	hsa.mir.581	+
BRCA	IL1RAPL1	hsa.mir.1291	-
BRCA	IL1RAPL1	hsa.mir.31	-
BRCA	OR5AU1	hsa.mir.1910	+
BRCA	COL22A1	hsa.mir.330	+
BRCA	ZNF280A	hsa.mir.1291	+
BRCA	ZNF280A	hsa.mir.1343	+
BRCA	ZNF280A	hsa.mir.330	+
BRCA	ZNF280A	hsa.mir.6720	+
BRCA	BUB1	hsa.mir.581	+
BRCA	BUB1	hsa.mir.582	+
BRCA	CHRNA5	hsa.mir.1224	+
BRCA	PYDC1	hsa.mir.320e	+
BRCA	PYDC1	hsa.mir.769	-
BRCA	NSG2	hsa.mir.153.2	+
BRCA	RNF150	hsa.mir.1910	-
BRCA	RNF150	hsa.mir.581	+
BRCA	RNF150	hsa.mir.7854	+
BRCA	FABP4	hsa.mir.3190	-
BRCA	FABP4	hsa.mir.3191	-
BRCA	FABP4	hsa.mir.330	-
BRCA	FABP4	hsa.mir.339	+
BRCA	FABP4	hsa.mir.642a	-
BRCA	ADORA2B	hsa.mir.5687	+
BRCA	HSD17B13	hsa.mir.320e	-
BRCA	HSD17B13	hsa.mir.330	-
BRCA	HSD17B13	hsa.mir.642a	-
BRCA	HSD17B13	hsa.mir.769	-
BRCA	SYT9	hsa.mir.1291	-
BRCA	SYT9	hsa.mir.4714	-
BRCA	TRH	hsa.mir.744	+
BRCA	DCDC1	hsa.mir.3190	+
BRCA	DCDC1	hsa.mir.642a	+
BRCA	ALK	hsa.mir.582	+
BRCA	LRG1	hsa.mir.1291	-
BRCA	LRG1	hsa.mir.582	-
BRCA	KCND3	hsa.mir.582	-
BRCA	NAT1	hsa.mir.3191	+
BRCA	NAT1	hsa.mir.320e	+
BRCA	NAT1	hsa.mir.449a	-
BRCA	NAT1	hsa.mir.581	+
BRCA	NAT1	hsa.mir.642a	+
BRCA	NAT1	hsa.mir.769	+
BRCA	NLRP5	hsa.mir.642a	+
BRCA	ECEL1	hsa.mir.582	+
BRCA	PAH	hsa.mir.338	+
BRCA	NXNL1	hsa.mir.769	-
BRCA	CTPS1	hsa.mir.581	+
BRCA	CTPS1	hsa.mir.582	+
BRCA	CFAP46	hsa.mir.449b	-
BRCA	CFAP46	hsa.mir.581	-
BRCA	CYP4F11	hsa.mir.582	-
BRCA	SCG2	hsa.mir.153.2	+
BRCA	CYP4F22	hsa.mir.582	-
BRCA	DRC3	hsa.mir.581	-
BRCA	LCE1D	hsa.mir.6720	+
BRCA	FRMD3	hsa.mir.582	+
BRCA	ID4	hsa.mir.582	+
BRCA	AZU1	hsa.mir.1291	+
BRCA	TPSAB1	hsa.mir.339	-
BRCA	TPSAB1	hsa.mir.581	-
BRCA	TPSAB1	hsa.mir.582	-
BRCA	CLEC7A	hsa.mir.5687	+
BRCA	TTC36	hsa.mir.582	-
BRCA	CCDC96	hsa.mir.1291	-
BRCA	CCDC96	hsa.mir.582	-
BRCA	RXFP4	hsa.mir.7854	-
BRCA	LRRN3	hsa.mir.582	+
BRCA	ADCY5	hsa.mir.1291	+
BRCA	STOX2	hsa.mir.1291	+
BRCA	STOX2	hsa.mir.581	+
BRCA	STOX2	hsa.mir.582	+
BRCA	INSM1	hsa.mir.153.2	+
BRCA	DAB1	hsa.mir.581	-
BRCA	APOBEC4	hsa.mir.449a	+
BRCA	TAS1R1	hsa.mir.1224	+
BRCA	TAS1R1	hsa.mir.5687	+
BRCA	TAS1R1	hsa.mir.582	+
BRCA	ADGRG2	hsa.mir.582	+
BRCA	CBX2	hsa.mir.4746	+
BRCA	EXO1	hsa.mir.581	+
BRCA	EXO1	hsa.mir.582	+
BRCA	TRHR	hsa.mir.1343	-
BRCA	MYO1H	hsa.mir.582	+
BRCA	UGT8	hsa.mir.3940	+
BRCA	UGT8	hsa.mir.5708	-
BRCA	UGT8	hsa.mir.582	+
BRCA	GRIK1-AS1	hsa.let.7a.3	+
BRCA	WDR49	hsa.mir.449a	+
BRCA	PCP2	hsa.mir.582	-
BRCA	PDZK1	hsa.mir.153.2	+
BRCA	CHST2	hsa.mir.5687	+
BRCA	CHST2	hsa.mir.582	+
BRCA	UBE2C	hsa.mir.581	+
BRCA	CSRP2	hsa.mir.582	+
BRCA	PHYHD1	hsa.mir.3191	-
BRCA	PHYHD1	hsa.mir.330	-
BRCA	PHYHD1	hsa.mir.581	-
BRCA	PHYHD1	hsa.mir.769	-
BRCA	CCNE2	hsa.mir.4661	+
BRCA		hsa.mir.339	+
BRCA	DOK7	hsa.mir.582	-
BRCA	PLEKHD1	hsa.mir.1291	+
BRCA	PLEKHD1	hsa.mir.449b	-
BRCA	PLEKHD1	hsa.mir.582	-
BRCA	TMPRSS7	hsa.mir.1291	-
BRCA	DIRAS1	hsa.mir.1291	+
BRCA	PRR15	hsa.mir.1291	-
BRCA	MIR7-3HG	hsa.mir.153.2	+
BRCA	MIR7-3HG	hsa.mir.5687	+
BRCA	MIR7-3HG	hsa.mir.6516	+
BRCA	KRT18P28	hsa.mir.1291	-
BRCA	SOX11	hsa.mir.3187	+
BRCA	SOX11	hsa.mir.4746	+
BRCA	TCIM	hsa.mir.1291	-
BRCA	EFCAB5	hsa.mir.4728	+
BRCA	ACER2	hsa.mir.1291	+
BRCA	SPACA4	hsa.mir.1291	-
BRCA	AMER3	hsa.mir.153.2	+
BRCA	ZNF454	hsa.mir.582	+
BRCA	STX19	hsa.mir.581	+
BRCA	STX19	hsa.mir.582	+
BRCA	ERFE	hsa.mir.1224	+
BRCA	TMEM139	hsa.mir.582	+
BRCA	ZNF552	hsa.mir.582	-
BRCA	KLHDC7A	hsa.mir.5687	-
BRCA	KLHDC7A	hsa.mir.581	-
BRCA	PXT1	hsa.mir.582	+
BRCA	SMCO3	hsa.let.7a.3	-
BRCA	SMCO3	hsa.mir.449a	-
BRCA	EGR3	hsa.mir.1224	-
BRCA	EGR3	hsa.mir.3190	-
BRCA	EGR3	hsa.mir.3191	-
BRCA	EGR3	hsa.mir.330	-
BRCA	EGR3	hsa.mir.642a	-
BRCA	TPPP2	hsa.mir.21	-
BRCA	TPPP2	hsa.mir.582	+
BRCA	TPPP2	hsa.mir.6510	+
BRCA	FCER1A	hsa.mir.3191	-
BRCA	FCER1A	hsa.mir.330	-
BRCA	FCER1A	hsa.mir.339	-
BRCA	FCER1A	hsa.mir.769	-
BRCA	APOBEC3B	hsa.mir.4661	+
BRCA	APOBEC3B	hsa.mir.581	+
BRCA	ATOH7	hsa.mir.320e	+
BRCA	ATOH7	hsa.mir.769	+
BRCA	FAM216B	hsa.mir.142	+
BRCA	ABCA13	hsa.mir.4746	+
BRCA	C1orf194	hsa.mir.449a	+
BRCA	C1orf194	hsa.mir.449b	-
BRCA	C10orf91	hsa.mir.5687	+
BRCA	PNPLA1	hsa.mir.5687	+
BRCA	MEIOC	hsa.mir.339	+
BRCA	TPRXL	hsa.mir.3940	+
BRCA	SSTR2	hsa.mir.1291	-
BRCA	RPH3AL	hsa.mir.1291	-
BRCA	ADIPOQ	hsa.mir.1291	+
BRCA		hsa.mir.449a	+
BRCA		hsa.mir.449b	-
BRCA	MUC16	hsa.mir.330	+
BRCA	TMEM132C	hsa.mir.3191	-
BRCA	TMEM132C	hsa.mir.642a	-
BRCA	TMEM132C	hsa.mir.769	-
BRCA	FDCSP	hsa.mir.6516	+
BRCA	PLAG1	hsa.mir.582	+
BRCA	FTMT	hsa.mir.125b.2	+
BRCA	PTCHD3	hsa.mir.21	-
BRCA	GABRG3	hsa.mir.582	+
BRCA	NLRP10	hsa.mir.1224	+
BRCA	OR5P3	hsa.mir.339	-
BRCA	IFNL1	hsa.mir.1910	+
BRCA	IFNL1	hsa.mir.7854	+
BRCA	NXPH3	hsa.mir.581	-
BRCA	ABAT	hsa.mir.581	+
BRCA	ABAT	hsa.mir.582	-
BRCA	CHST6	hsa.mir.1291	-
BRCA	CHST6	hsa.mir.5687	+
BRCA	CHST6	hsa.mir.582	+
BRCA	CCDC60	hsa.let.7a.3	-
BRCA	CCDC60	hsa.let.7b	-
BRCA	CCDC60	hsa.mir.3619	-
BRCA	CCDC60	hsa.mir.3667	-
BRCA	CCDC60	hsa.mir.449a	+
BRCA	CCDC60	hsa.mir.4762	-
BRCA	CCDC60	hsa.mir.5687	-
BRCA	CCDC60	hsa.mir.581	+
BRCA	FAM9A	hsa.mir.3691	+
BRCA	FAM9A	hsa.mir.581	+
BRCA	CABCOCO1	hsa.mir.339	+
BRCA	CABCOCO1	hsa.mir.3614	-
BRCA	CABCOCO1	hsa.mir.454	-
BRCA	CABCOCO1	hsa.mir.744	+
BRCA	OR7E38P	hsa.mir.582	+
BRCA	SH2D7	hsa.mir.582	+
BRCA	IZUMO1R	hsa.mir.142	+
BRCA	IZUMO1R	hsa.mir.194.2	+
BRCA	PCBP3	hsa.mir.582	+
BRCA	SLC35F3	hsa.mir.582	+
BRCA	FAM3B	hsa.let.7a.3	+
BRCA	FAM3B	hsa.mir.3667	-
BRCA	FAM3B	hsa.mir.4762	+
BRCA	FAM3B	hsa.mir.744	-
BRCA	SRARP	hsa.mir.582	-
BRCA	PRKX	hsa.mir.582	+
BRCA	KCNH8	hsa.mir.582	+
BRCA	CLDN5	hsa.mir.339	-
BRCA	C11orf72	hsa.mir.6761	+
BRCA	C1QTNF8	hsa.mir.449a	+
BRCA	GAST	hsa.mir.6720	+
BRCA	PTGER4P2	hsa.mir.581	-
BRCA	SLITRK6	hsa.mir.3191	+
BRCA	SLITRK6	hsa.mir.330	-
BRCA	SLITRK6	hsa.mir.642a	+
BRCA	PRSS55	hsa.mir.3065	+
BRCA	CDCA2	hsa.mir.5687	+
BRCA	CDCA2	hsa.mir.581	+
BRCA	AMER1	hsa.mir.5687	+
BRCA	AMER1	hsa.mir.581	+
BRCA	AMER1	hsa.mir.582	+
BRCA	LRRC26	hsa.mir.339	-
BRCA	MGAT4EP	hsa.mir.4728	+
BRCA	DRD1	hsa.mir.3191	+
BRCA	DRD1	hsa.mir.3913.1	-
BRCA	DRD1	hsa.mir.6502	-
BRCA	DRD1	hsa.mir.769	+
BRCA	LCN12	hsa.mir.1291	-
BRCA	WT1	hsa.mir.326	-
BRCA	WT1	hsa.mir.4763	+
BRCA	WT1	hsa.mir.6860	+
BRCA	ROBO2	hsa.mir.449b	+
BRCA	ZNF733P	hsa.mir.3150b	+
BRCA	ZNF733P	hsa.mir.5680	-
BRCA	SGCZ	hsa.mir.139	+
BRCA	KIAA0825	hsa.mir.581	+
BRCA	SPPL2C	hsa.mir.3190	-
BRCA	SPPL2C	hsa.mir.3191	-
BRCA	SPPL2C	hsa.mir.330	-
BRCA	SPPL2C	hsa.mir.642a	-
BRCA	MUC1	hsa.mir.449b	-
BRCA	MUC1	hsa.mir.582	-
BRCA	KCNQ5	hsa.mir.196a.1	-
BRCA	KCNQ5	hsa.mir.21	-
BRCA	KCNQ5	hsa.mir.6510	+
BRCA	ADAMTSL5	hsa.mir.1291	-
BRCA	CCDC190	hsa.mir.582	+
BRCA	HTR3E	hsa.mir.7854	+
BRCA	NBPF6	hsa.mir.449a	-
BRCA	NBPF6	hsa.mir.581	+
BRCA	NBPF6	hsa.mir.582	-
BRCA	KIF18B	hsa.mir.581	+
BRCA	KIF18B	hsa.mir.582	+
BRCA	CYP4F12	hsa.mir.1291	-
BRCA	LCE1E	hsa.mir.31	+
BRCA	LCE1E	hsa.mir.4661	+
BRCA	LCE1E	hsa.mir.636	+
BRCA	LCE1E	hsa.mir.6781	+
BRCA	AQP7P1	hsa.mir.3191	-
BRCA	AQP7P1	hsa.mir.320e	-
BRCA	AQP7P1	hsa.mir.330	-
BRCA	AQP7P1	hsa.mir.642a	-
BRCA	AQP7P1	hsa.mir.769	-
BRCA	AKAP14	hsa.mir.449a	+
BRCA	AKAP14	hsa.mir.449b	-
BRCA	CEACAM19	hsa.mir.582	-
BRCA	LCE1A	hsa.mir.31	+
BRCA	LCE1A	hsa.mir.4661	+
BRCA	LCE1A	hsa.mir.5579	+
BRCA	LCE1A	hsa.mir.636	+
BRCA	LCE1A	hsa.mir.7854	+
BRCA	LCE1A	hsa.mir.99a	+
BRCA	QRFPR	hsa.mir.1343	+
BRCA	MAPT	hsa.mir.581	-
BRCA	MAPT	hsa.mir.582	-
BRCA	CYP4A11	hsa.mir.642a	+
BRCA	CCK	hsa.mir.30b	-
BRCA	CCK	hsa.mir.3191	+
BRCA	CCK	hsa.mir.4661	-
BRCA	CCK	hsa.mir.581	-
BRCA	KCNJ11	hsa.mir.449b	-
BRCA	KCNJ11	hsa.mir.5687	-
BRCA	KCNJ11	hsa.mir.581	-
BRCA	KCNJ11	hsa.mir.582	-
BRCA	C2orf88	hsa.mir.582	+
BRCA	THSD4	hsa.mir.582	-
BRCA	ADH1A	hsa.mir.3191	-
BRCA	ADH1A	hsa.mir.320e	-
BRCA	ADH1A	hsa.mir.642a	-
BRCA	ADH1A	hsa.mir.769	-
BRCA	FYB2	hsa.mir.1291	-
BRCA	FAM72B	hsa.mir.4664	+
BRCA	NANOS1	hsa.mir.6761	+
BRCA	HMX3	hsa.mir.3610	+
BRCA	VWC2	hsa.let.7c	+
BRCA	VWC2	hsa.mir.125b.2	+
BRCA	CNR2	hsa.mir.139	+
BRCA	CNR2	hsa.mir.194.2	+
BRCA	CNR2	hsa.mir.3664	-
BRCA	CNR2	hsa.mir.548k	+
BRCA	CNR2	hsa.mir.6860	-
BRCA	CNR2	hsa.mir.708	-
BRCA	BEND4	hsa.mir.1343	+
BRCA	KLRG2	hsa.mir.4662a	+
BRCA	KLRG2	hsa.mir.5680	+
BRCA	KLRG2	hsa.mir.937	+
BRCA	APOD	hsa.mir.31	-
BRCA	PLAC9	hsa.mir.339	-
BRCA	FAM47E	hsa.mir.1291	-
BRCA	KRT77	hsa.mir.6510	+
BRCA	CXCL17	hsa.mir.4728	+
BRCA	KIF19	hsa.mir.449a	+
BRCA	EVL	hsa.mir.582	-
BRCA	NBPF4	hsa.mir.581	+
BRCA	NBPF4	hsa.mir.582	-
BRCA	FGF16	hsa.mir.1291	-
BRCA	FGF16	hsa.mir.449b	+
BRCA	ARL9	hsa.mir.1343	+
BRCA	ARL9	hsa.mir.6844	+
BRCA	MMP1	hsa.mir.3190	+
BRCA	MMP1	hsa.mir.3191	+
BRCA	MMP1	hsa.mir.5687	+
BRCA	MMP1	hsa.mir.581	+
BRCA	MMP1	hsa.mir.642a	+
BRCA	ADH1B	hsa.mir.3191	-
BRCA	ADH1B	hsa.mir.320e	-
BRCA	ADH1B	hsa.mir.330	-
BRCA	ADH1B	hsa.mir.642a	-
BRCA	ADH1B	hsa.mir.769	-
BRCA	S100A2	hsa.mir.31	+
BRCA	SIGLEC15	hsa.mir.192	-
BRCA	SIGLEC15	hsa.mir.548k	-
BRCA	IFNL3	hsa.mir.7705	+
BRCA	NEK5	hsa.mir.5687	-
BRCA	NEK5	hsa.mir.582	-
BRCA	SERPINA1	hsa.mir.1291	-
BRCA	SERPINA1	hsa.mir.339	+
BRCA	SERPINA1	hsa.mir.449a	-
BRCA	SERPINA1	hsa.mir.581	-
BRCA	SERPINA1	hsa.mir.744	+
BRCA	TPSB2	hsa.mir.339	-
BRCA	TPSB2	hsa.mir.581	-
BRCA	TPSB2	hsa.mir.582	-
BRCA		hsa.mir.6510	+
BRCA	GATA3-AS1	hsa.mir.581	-
BRCA	GATA3-AS1	hsa.mir.582	-
BRCA	SLC22A5	hsa.mir.449b	-
BRCA	SLC22A5	hsa.mir.582	-
BRCA	FABP12	hsa.mir.4746	+
BRCA		hsa.mir.582	+
BRCA	COL4A6	hsa.mir.339	+
BRCA	CFAP43	hsa.mir.1291	-
BRCA	CFAP43	hsa.mir.5687	-
BRCA	CFAP43	hsa.mir.581	-
BRCA	CFAP43	hsa.mir.582	-
BRCA	CFD	hsa.mir.5687	-
BRCA	CFD	hsa.mir.581	-
BRCA	CFD	hsa.mir.582	-
BRCA	MEIG1	hsa.mir.5687	+
BRCA	AKR1B10	hsa.mir.4758	+
BRCA	AKR1B10	hsa.mir.744	-
BRCA	SULT1C2	hsa.mir.31	-
BRCA	PEG3	hsa.mir.3610	+
BRCA	ANKRD35	hsa.mir.153.2	+
BRCA	ANKRD35	hsa.mir.671	+
BRCA	FAM3D	hsa.mir.30b	+
BRCA	FAM3D	hsa.mir.30d	+
BRCA	SMOC1	hsa.mir.582	+
BRCA	APCDD1L	hsa.mir.675	+
BRCA	BRINP2	hsa.mir.744	+
BRCA	RYR3	hsa.mir.1291	+
BRCA	MIR342	hsa.mir.582	-
BRCA	RNU1-94P	hsa.mir.1291	+
BRCA	RNA5SP123	hsa.let.7a.3	+
BRCA		hsa.mir.6514	-
BRCA		hsa.mir.6748	-
BRCA		hsa.mir.6860	-
BRCA		hsa.let.7b	-
BRCA		hsa.mir.4762	-
BRCA		hsa.mir.339	+
BRCA	RNU1-91P	hsa.mir.339	-
BRCA		hsa.mir.194.2	+
BRCA		hsa.mir.6514	-
BRCA		hsa.mir.6748	-
BRCA		hsa.mir.6860	-
BRCA	RHOT1P2	hsa.mir.449a	+
BRCA	CAPN8	hsa.mir.769	-
BRCA	MIR29B2CHG	hsa.mir.582	-
BRCA	RAET1G	hsa.mir.6761	+
BRCA	HSD3B1	hsa.mir.5579	+
BRCA	CYP21A1P	hsa.mir.581	-
BRCA	LY6G6C	hsa.mir.1291	-
BRCA	POTEKP	hsa.mir.6860	-
BRCA	MCCD1	hsa.mir.339	-
BRCA	POU5F1	hsa.mir.582	+
BRCA	MAS1L	hsa.mir.1224	-
BRCA	C9orf135	hsa.mir.3615	+
BRCA	SPATA31A1	hsa.mir.192	+
BRCA	SPATA31A1	hsa.mir.937	-
BRCA		hsa.mir.1291	-
BRCA	SYCE1L	hsa.mir.449b	-
BRCA	SYCE1L	hsa.mir.5687	-
BRCA	SYCE1L	hsa.mir.581	-
BRCA	OR7E36P	hsa.mir.6844	+
BRCA		hsa.mir.3150b	+
BRCA	KRT6A	hsa.mir.31	+
BRCA	DPF3	hsa.mir.582	+
BRCA		hsa.mir.449a	-
BRCA		hsa.mir.5687	-
BRCA		hsa.mir.581	-
BRCA		hsa.mir.582	-
BRCA	CLEC6A	hsa.mir.3150a	+
BRCA	CLEC6A	hsa.mir.3150b	+
BRCA	SERPINB5	hsa.mir.582	+
BRCA	CFAP99	hsa.mir.449a	-
BRCA	CFAP99	hsa.mir.582	-
BRCA		hsa.mir.4664	+
BRCA		hsa.mir.1291	+
BRCA	SNORA80D	hsa.mir.548k	+
BRCA	RNU6-342P	hsa.mir.10a	+
BRCA	RNU6-2	hsa.mir.548k	+
BRCA	RNU6-2	hsa.mir.6879	-
BRCA		hsa.mir.6748	-
BRCA		hsa.mir.6879	-
BRCA	RNU6-813P	hsa.mir.31	-
BRCA		hsa.let.7b	-
BRCA		hsa.mir.3619	-
BRCA		hsa.mir.3667	-
BRCA		hsa.mir.4762	-
BRCA		hsa.mir.4763	-
BRCA	MIR149	hsa.mir.5687	-
BRCA	IGLV1-44	hsa.mir.4453	+
BRCA	IGLV2-23	hsa.mir.339	-
BRCA	IGLC2	hsa.mir.581	-
BRCA	IGLC3	hsa.mir.5687	+
BRCA	IGLC3	hsa.mir.581	-
BRCA	IGHA2	hsa.mir.1343	-
BRCA	IGHG3	hsa.mir.5687	+
BRCA	IGHD3-3	hsa.mir.3150b	+
BRCA	IGHD2-2	hsa.mir.3150b	+
BRCA	IGHD2-2	hsa.mir.3610	+
BRCA	IGHD2-2	hsa.mir.582	+
BRCA	IGHV3-7	hsa.mir.582	+
BRCA	IGHV3-11	hsa.mir.5708	+
BRCA	IGHV3-13	hsa.mir.31	-
BRCA	IGHV1-46	hsa.mir.4453	+
BRCA	IGHV5-51	hsa.mir.1291	-
BRCA	TSSK1B	hsa.mir.1343	+
BRCA		hsa.mir.210	+
BRCA		hsa.mir.5691	-
BRCA	SNORD89	hsa.mir.6748	-
BRCA	RNA5SP297	hsa.mir.339	+
BRCA		hsa.mir.339	-
BRCA	RNA5SP354	hsa.mir.6514	-
BRCA	RNA5SP354	hsa.mir.6747	-
BRCA	RNA5SP354	hsa.mir.6748	-
BRCA	RNA5SP354	hsa.mir.6860	-
BRCA	RNA5SP354	hsa.mir.6879	-
BRCA	RNA5SP354	hsa.mir.7155	-
BRCA	RNU1-56P	hsa.mir.4758	+
BRCA	EWSAT1	hsa.mir.581	-
BRCA		hsa.mir.339	+
BRCA		hsa.mir.4714	-
BRCA	SFT2D2	hsa.mir.1291	+
BRCA	SFT2D2	hsa.mir.582	+
BRCA	ACKR1	hsa.mir.1224	-
BRCA	ACKR1	hsa.mir.153.2	-
BRCA	ACKR1	hsa.mir.3190	-
BRCA	ACKR1	hsa.mir.3191	-
BRCA	ACKR1	hsa.mir.582	-
BRCA	ACKR1	hsa.mir.642a	-
BRCA	ACKR1	hsa.mir.671	-
BRCA	ACKR1	hsa.mir.769	-
BRCA	YWHAZP2	hsa.mir.3150a	+
BRCA	SERBP1P1	hsa.mir.582	+
BRCA	PLAC9P1	hsa.mir.153.2	-
BRCA	PLAC9P1	hsa.mir.326	-
BRCA	PLAC9P1	hsa.mir.330	-
BRCA	PLAC9P1	hsa.mir.339	-
BRCA	PLAC9P1	hsa.mir.548k	-
BRCA	PLAC9P1	hsa.mir.642a	+
BRCA	KRT18P10	hsa.mir.1291	+
BRCA	MINDY4B	hsa.mir.449b	+
BRCA	FOXI3	hsa.mir.1343	+
BRCA	DCDC2C	hsa.mir.3191	-
BRCA	DCDC2C	hsa.mir.642a	-
BRCA	KRT18P11	hsa.mir.1291	+
BRCA	C5orf49	hsa.mir.449a	+
BRCA	ZNF663P	hsa.mir.582	+
BRCA	ANKRD20A11P	hsa.mir.449a	+
BRCA	FAM72D	hsa.mir.4664	+
BRCA	ST13P20	hsa.mir.210	+
BRCA		hsa.mir.3150b	+
BRCA	LINC01644	hsa.mir.581	-
BRCA		hsa.mir.10a	+
BRCA		hsa.mir.153.2	+
BRCA		hsa.mir.21	-
BRCA	LINC02076	hsa.mir.581	-
BRCA		hsa.mir.3687	+
BRCA	RAB6C	hsa.mir.1224	-
BRCA	RAB6C	hsa.mir.582	-
BRCA	PSMB11	hsa.mir.3190	-
BRCA	IGLC6	hsa.mir.581	-
BRCA	RNU2-29P	hsa.mir.3614	+
BRCA	RNU6-564P	hsa.mir.449b	-
BRCA		hsa.mir.4664	+
BRCA	TINCR	hsa.mir.151a	+
BRCA	TINCR	hsa.mir.30b	-
BRCA	TINCR	hsa.mir.3150b	+
BRCA	TINCR	hsa.mir.3610	+
BRCA	TINCR	hsa.mir.937	+
BRCA		hsa.mir.449b	+
BRCA		hsa.mir.1291	-
BRCA	LINC01342	hsa.mir.581	-
BRCA	LINC01342	hsa.mir.582	-
BRCA		hsa.mir.339	+
BRCA		hsa.mir.10a	+
BRCA		hsa.mir.581	+
BRCA		hsa.mir.6510	-
BRCA		hsa.mir.5687	+
BRCA	PHEX-AS1	hsa.mir.6510	+
BRCA		hsa.mir.1910	-
BRCA		hsa.mir.4645	+
BRCA	CHL1-AS2	hsa.mir.339	-
BRCA	CHL1-AS2	hsa.mir.671	-
BRCA		hsa.mir.339	+
BRCA	C4B	hsa.mir.339	-
BRCA	C4B	hsa.mir.581	-
BRCA	LINC01087	hsa.mir.582	-
BRCA	LINC01087	hsa.mir.6860	-
BRCA	LINC01117	hsa.mir.1291	-
BRCA	LINC01117	hsa.mir.5687	-
BRCA	LINC01117	hsa.mir.581	-
BRCA		hsa.mir.1224	+
BRCA	FCF1P7	hsa.mir.339	+
BRCA	IMPDH1P8	hsa.mir.582	+
BRCA	KRT18P39	hsa.mir.1291	-
BRCA	TMEM72-AS1	hsa.mir.581	+
BRCA	TMEM72-AS1	hsa.mir.582	-
BRCA	YBX1P1	hsa.mir.581	+
BRCA	YBX1P1	hsa.mir.582	+
BRCA	PGM5-AS1	hsa.mir.139	+
BRCA	PGM5-AS1	hsa.mir.769	-
BRCA		hsa.mir.1291	+
BRCA		hsa.mir.5687	+
BRCA	LINC00092	hsa.mir.142	+
BRCA	LINC00092	hsa.mir.582	+
BRCA	CT62	hsa.mir.582	-
BRCA	IGKV1OR9-2	hsa.mir.3913.1	-
BRCA	IGKV1OR9-2	hsa.mir.5687	+
BRCA	IGKV1OR9-2	hsa.mir.582	-
BRCA		hsa.mir.210	-
BRCA		hsa.mir.3190	-
BRCA		hsa.mir.642a	-
BRCA	CADM3-AS1	hsa.mir.769	-
BRCA		hsa.mir.5687	-
BRCA		hsa.mir.339	+
BRCA		hsa.mir.339	+
BRCA	P3H2-AS1	hsa.mir.582	+
BRCA		hsa.mir.339	+
BRCA		hsa.mir.581	-
BRCA		hsa.mir.582	+
BRCA	SLC16A1-AS1	hsa.mir.5687	+
BRCA	SLC16A1-AS1	hsa.mir.582	+
BRCA	SCDP1	hsa.mir.196a.1	+
BRCA	SCDP1	hsa.mir.3614	+
BRCA	SCDP1	hsa.mir.3678	+
BRCA	SCDP1	hsa.mir.454	+
BRCA		hsa.mir.1291	-
BRCA		hsa.mir.7854	-
BRCA		hsa.mir.582	-
BRCA		hsa.mir.1291	+
BRCA	GTF2IP7	hsa.mir.581	-
BRCA	RPS3AP53	hsa.mir.339	+
BRCA		hsa.mir.1291	+
BRCA		hsa.mir.339	+
BRCA	SELENOOLP	hsa.mir.3136	+
BRCA	LINC01736	hsa.mir.581	+
BRCA	ORM2	hsa.mir.6761	+
BRCA	PCAT6	hsa.mir.582	+
BRCA	OR7E26P	hsa.mir.3136	+
BRCA		hsa.mir.5708	+
BRCA	ZNF883	hsa.mir.1291	+
BRCA	ZNF883	hsa.mir.582	+
BRCA	LINC02521	hsa.mir.5687	+
BRCA	SRGAP3-AS2	hsa.let.7b	-
BRCA	SRGAP3-AS2	hsa.mir.449a	+
BRCA	SRGAP3-AS2	hsa.mir.449b	-
BRCA	RPSAP1	hsa.mir.339	-
BRCA		hsa.mir.3619	-
BRCA	SATB1-AS1	hsa.mir.582	+
BRCA	LINC02587	hsa.mir.3191	-
BRCA	LINC02587	hsa.mir.642a	-
BRCA		hsa.mir.339	-
BRCA		hsa.mir.5687	+
BRCA		hsa.mir.582	-
BRCA	RPL19P20	hsa.mir.142	+
BRCA	RPL19P20	hsa.mir.21	-
BRCA	RPL19P20	hsa.mir.6783	+
BRCA	LINC00582	hsa.mir.581	-
BRCA	ORM1	hsa.mir.6761	+
BRCA	SPINK8	hsa.mir.339	-
BRCA		hsa.mir.937	-
BRCA		hsa.mir.3190	+
BRCA		hsa.mir.3191	+
BRCA		hsa.mir.5687	-
BRCA		hsa.mir.581	-
BRCA		hsa.mir.642a	+
BRCA		hsa.mir.210	+
BRCA	ANKRD36BP2	hsa.mir.581	-
BRCA	ANKRD36BP2	hsa.mir.582	+
BRCA		hsa.mir.3150b	+
BRCA		hsa.mir.4662a	+
BRCA		hsa.mir.139	-
BRCA		hsa.mir.194.2	-
BRCA		hsa.mir.3664	+
BRCA		hsa.mir.5579	-
BRCA		hsa.mir.6514	-
BRCA		hsa.mir.6748	+
BRCA		hsa.mir.708	+
BRCA	PRRT3-AS1	hsa.mir.449a	-
BRCA	TPRG1-AS2	hsa.mir.5708	+
BRCA	TPRG1-AS2	hsa.mir.744	+
BRCA	LINC01840	hsa.mir.548t	+
BRCA	SIAH1P1	hsa.mir.338	+
BRCA	BANF1P2	hsa.mir.5687	+
BRCA	BANF1P2	hsa.mir.582	+
BRCA		hsa.mir.210	+
BRCA		hsa.mir.4662a	+
BRCA	RPEP3	hsa.mir.339	-
BRCA	STMND1	hsa.mir.1910	+
BRCA	STMND1	hsa.mir.5687	+
BRCA	STMND1	hsa.mir.582	-
BRCA	STMND1	hsa.mir.7854	-
BRCA		hsa.mir.581	-
BRCA		hsa.mir.1291	+
BRCA	LINC00160	hsa.mir.1291	-
BRCA	HAR1B	hsa.mir.153.2	+
BRCA	YBX1P2	hsa.mir.582	+
BRCA	LINC01423	hsa.mir.339	+
BRCA	MTND4LP1	hsa.mir.8072	+
BRCA		hsa.mir.4443	+
BRCA		hsa.mir.582	+
BRCA		hsa.mir.339	+
BRCA		hsa.mir.1291	+
BRCA	GAPDHP59	hsa.mir.210	+
BRCA	LINC01198	hsa.mir.4746	+
BRCA	LINC01198	hsa.mir.4787	+
BRCA	CYP21A2	hsa.mir.1291	-
BRCA	CYP21A2	hsa.mir.581	-
BRCA	CYP21A2	hsa.mir.582	-
BRCA		hsa.mir.1291	-
BRCA		hsa.mir.449b	-
BRCA		hsa.mir.210	+
BRCA		hsa.mir.581	-
BRCA		hsa.mir.1910	+
BRCA	LINC01105	hsa.mir.4728	+
BRCA	LNCPRESS1	hsa.mir.1291	-
BRCA	LNCPRESS1	hsa.mir.3190	-
BRCA	LNCPRESS1	hsa.mir.3191	-
BRCA	LNCPRESS1	hsa.mir.330	-
BRCA	LNCPRESS1	hsa.mir.449a	-
BRCA	LNCPRESS1	hsa.mir.581	-
BRCA	LNCPRESS1	hsa.mir.642a	-
BRCA		hsa.mir.339	+
BRCA	PPIAP35	hsa.mir.582	+
BRCA		hsa.mir.339	-
BRCA		hsa.mir.4746	+
BRCA		hsa.mir.581	-
BRCA		hsa.mir.582	-
BRCA		hsa.mir.125b.2	+
BRCA	TNF	hsa.mir.5687	-
BRCA	ERVH48-1	hsa.mir.1224	+
BRCA	ERVH48-1	hsa.mir.516a.2	+
BRCA	ERVH48-1	hsa.mir.522	-
BRCA	ERVH48-1	hsa.mir.526b	-
BRCA		hsa.mir.1343	+
BRCA		hsa.mir.31	+
BRCA	SYF2P2	hsa.mir.339	+
BRCA		hsa.mir.5708	+
BRCA	AMMECR1LP1	hsa.mir.3648	+
BRCA	FAM53B-AS1	hsa.mir.339	+
BRCA	CHRM3-AS2	hsa.mir.142	+
BRCA		hsa.mir.339	-
BRCA		hsa.mir.3191	+
BRCA		hsa.mir.4728	+
BRCA	ANAPC1P1	hsa.mir.582	+
BRCA	LINC01765	hsa.mir.449a	+
BRCA	LINC01765	hsa.mir.449b	-
BRCA	IGHV3OR16-10	hsa.mir.582	-
BRCA		hsa.mir.581	-
BRCA	LINC01781	hsa.mir.139	+
BRCA	LINC01781	hsa.mir.3664	-
BRCA	LINC01781	hsa.mir.5579	+
BRCA	LINC01781	hsa.mir.6514	+
BRCA	KCNH1-IT1	hsa.mir.135a.1	+
BRCA	KCNH1-IT1	hsa.mir.425	+
BRCA	LINC01505	hsa.mir.582	+
BRCA		hsa.mir.642a	+
BRCA		hsa.mir.1291	-
BRCA		hsa.mir.582	-
BRCA	FOXP4-AS1	hsa.mir.4443	+
BRCA		hsa.mir.210	+
BRCA		hsa.mir.8072	+
BRCA		hsa.mir.708	+
BRCA	MRPL53P1	hsa.mir.339	+
BRCA		hsa.mir.138.1	+
BRCA		hsa.mir.4443	+
BRCA		hsa.mir.4787	+
BRCA		hsa.mir.582	+
BRCA		hsa.mir.339	+
BRCA	PPIAP20	hsa.mir.339	-
BRCA	ANKRD34C	hsa.mir.6860	+
[truncated: 9,549 more rows]
